# Supplementary material for: Strategies for remote enantiocontrol in chiral gold(iii) complexes applied to catalytic enantioselective γ,δ-Diels–Alder reactions
Source: PubMed Central journal article supplement — Chem Sci. 2020 Mar 19;11(25):6450–6. doi: 10.1039/d0sc00497a (PMC8152632; doi:10.1039/d0sc00497a), 2020-03-19
Supplement: SC-011-D0SC00497A-s001.pdf [file SC-011-D0SC00497A-s001.pdf]

## Supporting Information

### Strategies for Remote Enantiocontrol in Chiral Gold(III) Complexes Applied to Catalytic Enantioselective $\gamma,\delta$ -Diels-Alder Reactions

Jolene P. Reid,<sup>†a</sup> Mingyou Hu,<sup>†bc</sup> Susumu Itoh,<sup>b</sup> Banruo Huang,<sup>b</sup> Cynthia M. Hong,<sup>b</sup> Hengye Xiang,<sup>b</sup> Matthew S. Sigman,<sup>\*a</sup> and F. Dean Toste<sup>\*b</sup>

<sup>†</sup>Authors contributed equally

<sup>a</sup> Department of Chemistry, University of Utah, 315 South 1400 East, Salt Lake City, Utah 84112, United States

<sup>b</sup> Department of Chemistry, University of California, Berkeley, California 94720, United States

<sup>c</sup> Department of Chemistry, School of Science, Xi'an Key Laboratory of Sustainable Energy Material Chemistry and MOE Key Laboratory for Nonequilibrium Synthesis and Modulation of Condensed Matter, Xi'an Jiaotong University, Xi'an 710049, P. R. China

\*E-mail: fdtoste@berkeley.edu; tel: (+1) 510-6422850

\*E-mail: sigman@chem.utah.edu; tel: (+1) 801-5850774

---

## Table of Contents

|                                                                                                                |            |
|----------------------------------------------------------------------------------------------------------------|------------|
| <b>1. General Information</b> .....                                                                            | <b>3</b>   |
| <b>2. Preparation of <math>\alpha,\beta,\gamma,\delta</math>-unsaturated aldehydes</b> .....                   | <b>4</b>   |
| <b>3. Preparation of Au(III) complexes</b> .....                                                               | <b>9</b>   |
| <b>4. Characterization of Products</b> .....                                                                   | <b>22</b>  |
| <b>5. Full list of authors in the Gaussian09 reference</b> .....                                               | <b>57</b>  |
| <b>6. Computational Methods</b> .....                                                                          | <b>58</b>  |
| <b>7. Cartesian Coordinates</b> .....                                                                          | <b>59</b>  |
| <b>8. Parameters Collected</b> .....                                                                           | <b>455</b> |
| <b>9. Model development</b> .....                                                                              | <b>462</b> |
| <b>10. <math>^1\text{H}</math> and <math>^{13}\text{C}</math> NMR Spectra of Isolated New Compounds.</b> ..... | <b>465</b> |
| <b>11. Crystal data and structure refinement for 4z-NTf<sub>2</sub>.</b> .....                                 | <b>511</b> |
| <b>12. References</b> .....                                                                                    | <b>512</b> |

---

## 1. General Information

Unless otherwise mentioned, all reactions were performed in oven-dried glassware sealed with rubber septa under a nitrogen atmosphere and were stirred with Teflon-coated magnetic stir bars. Dry tetrahydrofuran (THF), toluene, dimethylformamide (DMF), acetonitrile, triethylamine (TEA) and dichloromethane (DCM) were obtained by passing these previously degassed solvents through activated alumina columns. Dimethyl sulfoxide (DMSO), benzotrifluoride (PhCF<sub>3</sub>) and nitromethane (MeNO<sub>2</sub>) were distilled from CaH<sub>2</sub> and kept in a sealed tube with 4Å molecular sieves. All other reagents were used as received. Reactions were monitored by thin layer chromatography (TLC) on Silicycle Siliplate™ glass backed TLC plates (250 µm thickness, 60 Å porosity, F-254 indicator) and visualized by UV irradiation and Cerium Ammonium Molybdate stain. Volatile solvents were removed under reduced pressure with a rotary evaporator and dried on high vacuum on a Schlenk line. <sup>1</sup>H-NMR, <sup>13</sup>C-NMR, and <sup>19</sup>F-NMR spectra were taken with Bruker spectrometers operating at 300, 400, 500, 600 or 700 MHz for <sup>1</sup>H (75, 100, 125, 150 and 175 MHz for <sup>13</sup>C). Chemical shifts are reported relative to the residual solvent signal. NMR data are reported as follows: chemical shift (multiplicity, coupling constants where applicable, number of hydrogens). Splitting is reported with the following symbols: s = singlet, bs = broad singlet, d = doublet, t = triplet, q = quartets, hept = heptet, dd = doublet of doublets, dt = doublet of triplets, m = multiplet, at = apparent triplet, dq = doublet of quartets. High-resolution mass spectra (HRMS) were performed on a Thermo LTQ-FTICR (7T, ESI) by the QB3 mass spectral facility at the University of California, Berkeley. Elemental Analyses were performed by the Microanalytical Facility at the University of California, Berkeley. Previously reported compounds were synthesized according to literature procedures.

---

## 2. Preparation of $\alpha,\beta,\gamma,\delta$ -unsaturated aldehydes

Compound **1a** ((2E,4E)-hepta-2,4-dienal) was purchased from commercial source with an isomer ratio of 86:14 and used as received. Compounds **1b-1p** and **1s** were prepared according to Wenkert et al.<sup>1</sup> Compound **1q** (ethyl (2E,4E)-5-methyl-6-oxohexa-2,4-dienoate) was prepared by the reaction of ethyl diazoacetate with 3-methylfuran according to the following general procedure. Compound **1r** (ethyl (2E,4E)-6-oxohepta-2,4-dienoate) was prepared by the reaction of ethyl diazoacetate with 2-methylfuran according to the following general procedure. Compound **1t** ((1E,3E)-5-oxopenta-1,3-dien-1-yl acetate) was prepared according to Grabowski et al.<sup>2</sup>

**Typical experimental procedures for the preparation of (2E,4E)-6-oxohexa-2,4-dienoate 1b-1s (1b as an example):**

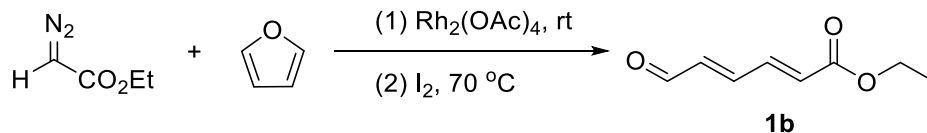

(A modified procedure as described in ref. 1 was used). A solution of 20 mmol of ethyl diazoacetate (2.47 mL, 85% purity in DCM from commercial source) in 2 mL of the required furan was slowly (over 10 min) added to a stirring suspension of 0.01 mmol of dirhodium tetraacetate in 8 mL of furan. The reaction mixture was kept stirring at room temperature for over 12 h. The mixture was filtered through a short column of silica gel to remove  $\text{Rh}_2(\text{OAc})_4$ , washed with DCM or ethyl acetate, and the filtrate was collected in a sealed tube. A small amount of  $\text{I}_2$  (ca. 2~5%) was added into the tube, and the mixture was heated to  $70\text{ }^\circ\text{C}$  for 6 h. Then cooled down to rt, the mixture was washed with  $\text{Na}_2\text{S}_2\text{O}_3$  (aq.), dried over  $\text{Na}_2\text{SO}_4$ , after the solvent was removed under vacuum, the residue was purified by silica gel column



---

chromatography with petroleum ether (PE)/ethyl acetate (EA) (20:1~5:1) as the eluent to give **1b** as a light yellow oil (1.63 g, 53% yield).

**Decyl (2E,4E)-6-oxohexa-2,4-dienoate (1e)**

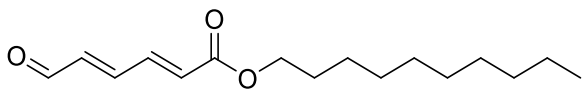

$^1\text{H}$  NMR (700 MHz,  $\text{CDCl}_3$ )  $\delta$  9.66 (d,  $J = 7.5$  Hz, 1H), 7.40 (dd,  $J = 15.1, 11.5$  Hz, 1H), 7.16 (dd,  $J = 15.1, 11.6$  Hz, 1H), 6.41 (dd,  $J = 15.4, 7.6$  Hz, 1H), 6.30 (d,  $J = 15.4$  Hz, 1H), 4.18 (t,  $J = 6.5$  Hz, 2H), 1.70 – 1.63 (m, 2H), 1.40 – 1.19 (m, 14H), 0.87 (t,  $J = 6.8$  Hz, 3H).  $^{13}\text{C}$  NMR (176 MHz,  $\text{CDCl}_3$ )  $\delta$  192.96, 165.55, 147.30, 140.27, 136.97, 130.01, 65.34, 31.89, 29.53, 29.51, 29.30, 29.24, 28.58, 25.91, 22.68, 14.13. HRMS (m/z): calculated for  $\text{C}_{16}\text{H}_{26}\text{NaO}_3$  [ $\text{M} + \text{Na}$ ] $^+$ , 289.1774; observed, 289.1792.

**Isopentyl (2E,4E)-6-oxohexa-2,4-dienoate (1f)**

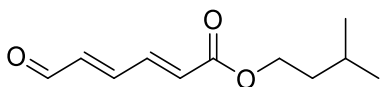

$^1\text{H}$  NMR (700 MHz,  $\text{CDCl}_3$ )  $\delta$  9.66 (d,  $J = 7.7$  Hz, 1H), 7.40 (dd,  $J = 15.3, 11.4$  Hz, 1H), 7.16 (dd,  $J = 15.3, 11.4$  Hz, 1H), 6.41 (dd,  $J = 15.5, 7.7$  Hz, 1H), 6.30 (d,  $J = 15.4$  Hz, 1H), 4.22 (t,  $J = 6.9$  Hz, 2H), 1.71 (dt,  $J = 13.4, 6.7$  Hz, 1H), 1.57 (q,  $J = 6.9$  Hz, 2H), 0.93 (d,  $J = 6.8$  Hz, 6H).  $^{13}\text{C}$  NMR (176 MHz,  $\text{CDCl}_3$ )  $\delta$  192.96, 165.54, 147.28, 140.28, 136.98, 129.99, 63.82, 37.26, 25.07, 22.46. HRMS (m/z): calculated for  $\text{C}_{11}\text{H}_{16}\text{NaO}_3$  [ $\text{M} + \text{Na}$ ] $^+$ , 219.0992; observed, 219.1001.

---

**Benzyl (2E,4E)-6-oxohexa-2,4-dienoate (1g)**

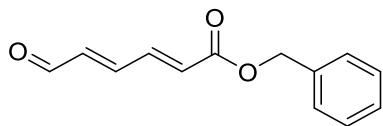

$^1\text{H}$  NMR (700 MHz,  $\text{CDCl}_3$ )  $\delta$  9.67 (d,  $J = 7.7$  Hz, 1H), 7.45 (dd,  $J = 15.3, 11.4$  Hz, 1H), 7.41 – 7.33 (m, 5H), 7.16 (dd,  $J = 15.4, 11.4$  Hz, 1H), 6.41 (dd,  $J = 15.5, 7.7$  Hz, 1H), 6.35 (d,  $J = 15.4$  Hz, 1H), 5.24 (s, 2H).  $^{13}\text{C}$  NMR (176 MHz,  $\text{CDCl}_3$ )  $\delta$  192.92, 165.27, 147.07, 140.84, 137.19, 135.46, 129.53, 128.69, 128.54, 128.44, 66.93. HRMS ( $m/z$ ): calculated for  $\text{C}_{13}\text{H}_{12}\text{NaO}_3$  [ $\text{M} + \text{Na}$ ] $^+$ , 239.0679; observed, 239.0688.

**Phenethyl (2E,4E)-6-oxohexa-2,4-dienoate (1h)**

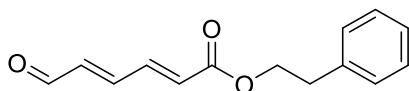

$^1\text{H}$  NMR (700 MHz,  $\text{CDCl}_3$ )  $\delta$  9.67 (d,  $J = 7.7$  Hz, 1H), 7.39 (dd,  $J = 15.4, 11.3$  Hz, 1H), 7.32 (t,  $J = 7.4$  Hz, 2H), 7.26 – 7.23 (m, 3H), 7.15 (dd,  $J = 15.4, 11.3$  Hz, 1H), 6.41 (dd,  $J = 15.4, 7.7$  Hz, 1H), 6.29 (d,  $J = 15.4$  Hz, 1H), 4.42 (t,  $J = 7.0$  Hz, 2H), 3.01 (t,  $J = 7.0$  Hz, 2H).  $^{13}\text{C}$  NMR (176 MHz,  $\text{CDCl}_3$ )  $\delta$  192.94, 165.36, 147.16, 140.55, 137.54, 137.10, 129.70, 128.91, 128.60, 126.73, 65.54, 35.06. HRMS ( $m/z$ ): calculated for  $\text{C}_{14}\text{H}_{14}\text{NaO}_3$  [ $\text{M} + \text{Na}$ ] $^+$ , 253.0835; observed, 253.0847.

**Cyclohexyl (2E,4E)-6-oxohexa-2,4-dienoate (1j)**

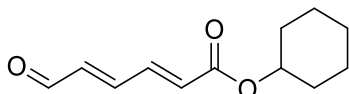

$^1\text{H}$  NMR (700 MHz,  $\text{CDCl}_3$ )  $\delta$  9.66 (d,  $J = 7.7$  Hz, 1H), 7.39 (dd,  $J = 15.3, 11.3$  Hz, 1H), 7.16 (dd,  $J = 15.4, 11.3$  Hz, 1H), 6.41 (dd,  $J = 15.4, 7.7$  Hz, 1H), 6.29 (d,  $J = 15.4$  Hz, 1H), 4.90 – 4.83 (m, 1H), 1.92 – 1.85 (m,

2H), 1.77 – 1.73 (m, 2H), 1.58 – 1.54 (m, 1H), 1.49 – 1.44 (m, 2H), 1.42 – 1.34 (m, 2H), 1.30 – 1.23 (m, 1H). <sup>13</sup>C NMR (176 MHz, CDCl<sub>3</sub>) δ 193.01, 164.90, 147.44, 139.99, 136.85, 130.66, 73.58, 31.60, 25.33, 23.74. HRMS (m/z): calculated for C<sub>12</sub>H<sub>16</sub>NaO<sub>3</sub> [M + Na]<sup>+</sup>, 231.0992; observed, 231.0981.

**((1*s*,3*s*)-adamantan-1-yl)methyl (2*E*,4*E*)-6-oxohexa-2,4-dienoate (1k)**

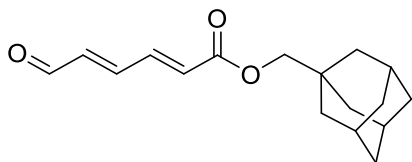

<sup>1</sup>H NMR (700 MHz, CDCl<sub>3</sub>) δ 9.69 – 9.65 (m, *J* = 7.7 Hz, 1H), 7.41 (dd, *J* = 15.3, 11.4 Hz, 1H), 7.17 (dd, *J* = 15.4, 11.4 Hz, 1H), 6.43 (dd, *J* = 15.5, 7.7 Hz, 1H), 6.34 (d, *J* = 15.4 Hz, 1H), 3.80 (s, 2H), 2.00 (s, 3H), 1.76 – 1.73 (m, 3H), 1.68 – 1.64 (m, 3H), 1.56 (s, 6H). <sup>13</sup>C NMR (176 MHz, CDCl<sub>3</sub>) δ 192.97, 165.68, 147.31, 140.21, 136.97, 130.08, 74.64, 39.28, 36.92, 33.36, 28.00. HRMS (m/z): calculated for C<sub>17</sub>H<sub>22</sub>NaO<sub>3</sub> [M + Na]<sup>+</sup>, 297.1461; observed, 297.1475.

**(3*s*,5*s*,7*s*)-Adamantan-1-yl (2*E*,4*E*)-6-oxohexa-2,4-dienoate (1l)**

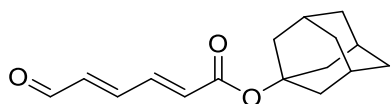

<sup>1</sup>H NMR (700 MHz, CDCl<sub>3</sub>) δ 9.65 (d, *J* = 7.7 Hz, 1H), 7.30 (dd, *J* = 15.0, 11.6 Hz, 1H), 7.14 (dd, *J* = 15.2, 11.5 Hz, 1H), 6.39 (dd, *J* = 15.4, 7.7 Hz, 1H), 6.22 (d, *J* = 15.3 Hz, 1H), 2.19 (s, 3H), 2.15 (s, 6H), 1.71 – 1.63 (m, 6H). <sup>13</sup>C NMR (176 MHz, CDCl<sub>3</sub>) δ 193.09, 164.37, 147.72, 139.26, 136.56, 132.26, 81.69, 41.30, 36.13, 30.85. HRMS (m/z): calculated for C<sub>16</sub>H<sub>20</sub>NaO<sub>3</sub> [M + Na]<sup>+</sup>, 283.1305; observed, 283.1320.

**(1*R*,2*S*,5*S*)-Adamantan-2-yl (2*E*,4*E*)-6-oxohexa-2,4-dienoate (1*m*)**

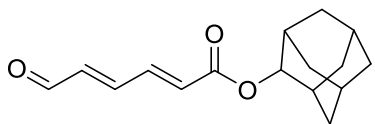

$^1\text{H}$  NMR (700 MHz,  $\text{CDCl}_3$ )  $\delta$  9.68 (d,  $J = 7.7$  Hz, 1H), 7.42 (dd,  $J = 15.3, 11.4$  Hz, 1H), 7.17 (dd,  $J = 15.4, 11.4$  Hz, 1H), 6.43 (dd,  $J = 15.5, 7.7$  Hz, 1H), 6.35 (d,  $J = 15.4$  Hz, 1H), 5.04 (s, 1H), 2.05 (t,  $J = 15.7$  Hz, 4H), 1.91 – 1.70 (m, 9H), 1.61 – 1.57 (m, 1H).  $^{13}\text{C}$  NMR (176 MHz,  $\text{CDCl}_3$ )  $\delta$  193.01, 164.84, 147.47, 139.92, 136.85, 130.84, 77.97, 37.32, 36.31, 31.88, 31.83, 27.19, 26.94. HRMS ( $m/z$ ): calculated for  $\text{C}_{16}\text{H}_{20}\text{NaO}_3$   $[\text{M} + \text{Na}]^+$ , 283.1305; observed, 283.1311.

**Benzo[*d*][1,3]dioxol-5-yl (2*E*,4*E*)-6-oxohexa-2,4-dienoate (1*s*)**

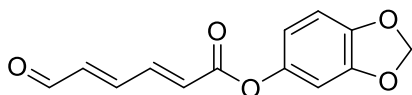

$^1\text{H}$  NMR (700 MHz,  $\text{CDCl}_3$ )  $\delta$  9.71 (d,  $J = 7.6$  Hz, 1H), 7.58 (dd,  $J = 15.4, 11.3$  Hz, 1H), 7.23 (dd,  $J = 15.4, 11.3$  Hz, 1H), 6.79 (d,  $J = 8.4$  Hz, 1H), 6.66 (d,  $J = 2.2$  Hz, 1H), 6.58 (dd,  $J = 8.4, 2.3$  Hz, 1H), 6.50 – 6.45 (m, 2H), 6.00 (s, 2H).  $^{13}\text{C}$  NMR (176 MHz,  $\text{CDCl}_3$ )  $\delta$  192.83, 164.19, 148.11, 146.62, 145.62, 144.66, 142.12, 137.66, 128.73, 113.79, 108.07, 103.54, 101.83. HRMS ( $m/z$ ): calculated for  $\text{C}_{13}\text{H}_{10}\text{NaO}_5$   $[\text{M} + \text{Na}]^+$ , 269.0420; observed, 269.0425.

### 3. Preparation of Au(III) complexes

IPrAu(III)(biphenyl)Cl was prepared according to reference 3.

#### 3.1. Preparation of (biphenyl)Au(III)Cl dimer:

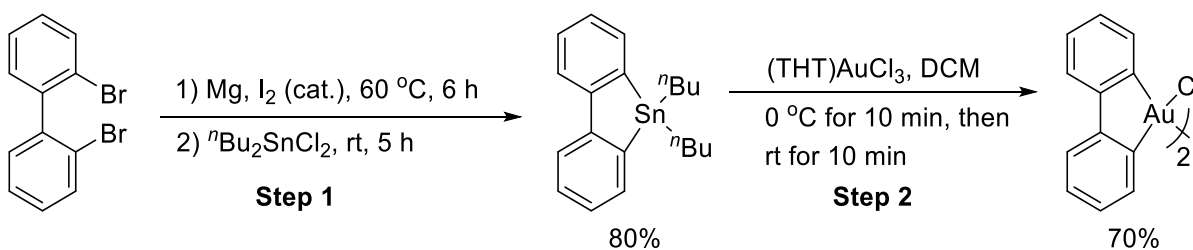

**Step 1:** (A modified procedure by using Grignard reagent was employed) A 100-mL flask charged with a stir bar, a condenser, and Mg (528 mg, 22 mmol), was added 50 mL THF, and a small piece of I<sub>2</sub> (catalytic amount). 1 mL of 2,2'-Dibromo-1,1'-biphenyl (3.12 g, 10 mmol in 10 mL THF) was added, then the reaction mixture was heated with a heat gun, until the color of I<sub>2</sub> disappeared (the reaction was initiated), stopped heating, and the residue 2,2'-Dibromo-1,1'-biphenyl (in THF) was added. The reaction mixture was heated to 60 °C for 6 h, then cooled down to rt, and dibutyltin(II) chloride (3.03 g, 10 mmol) in 10 mL THF was added, and the reaction was stirred at rt for 5 h. The reaction was quenched with water 40 mL, and extracted with Et<sub>2</sub>O, dried over Na<sub>2</sub>SO<sub>4</sub>. After removing the solvent under vacuum, the residue was purified by column chromatography (the silica gel was neutralized by 5% Et<sub>3</sub>N/hexanes) with 2% Et<sub>3</sub>N/hexanes as eluent to give 5,5-dibutyl-5H-dibenzo[b,d]stannole as a white solid (3.08 g, 80% yield).

**Step 2:** 5,5-Dibutyl-5H-dibenzo[b,d]stannole (102 mg, 0.26 mmol) was placed in a 20 mL vial with 5 mL DCM and cooled down to 0 °C, then (THT)AuCl<sub>3</sub> (104 mg, 0.26 mmol) was added portionwise in 10 min.

---

The cold bath was removed and the reaction was kept stirring for additional 10 min. In a 100-mL flask was charged with a stir bar and 70 mL hexanes, the reaction mixture was passed through a pad of celite into the flask with continuous stirring, a white precipitate was formed, the white solid was collected by filtration (73 mg, 72% yield).

**3.2. Preparation of IMesAu(III)(biphenyl)Cl:**<sup>3</sup> (This compound was prepared via a modified procedure according to IPrAu(III)(biphenyl)Cl).

**Method A:**

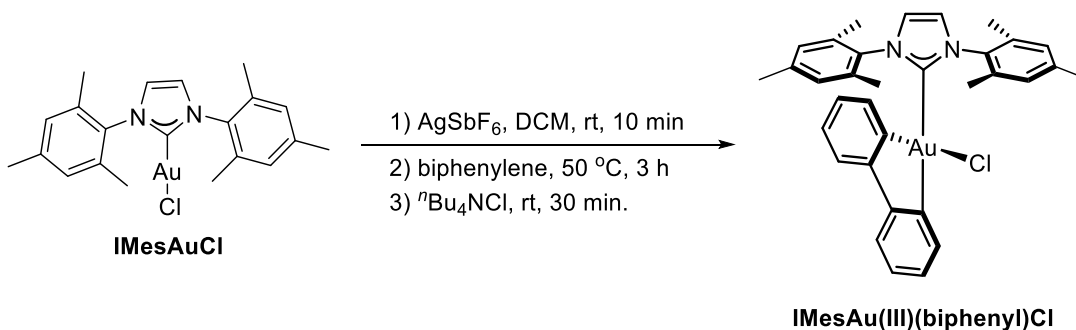

To a mixture of IMesAuCl (43.0 mg, 0.08 mmol) and AgSbF<sub>6</sub> (30.0 mg, 0.09 mmol) was added CH<sub>2</sub>Cl<sub>2</sub> (4 mL) at rt and stirred for 10 min. The reaction mixture was then passed through glass fiber to remove AgCl, then biphenylene (27.4 mg, 0.18 mmol) was added, and the reaction mixture was heated to 50 °C and stirred for 3 h. After this time, tetrabutylammonium chloride (27.0 mg, 0.10 mmol) was added and stirred for another 0.5 h. The title complex 3 was purified by flash column chromatography with hexanes/EA (v/v, 5:1) to give a yellow solid (36 mg, 65% yield).

### Method B:

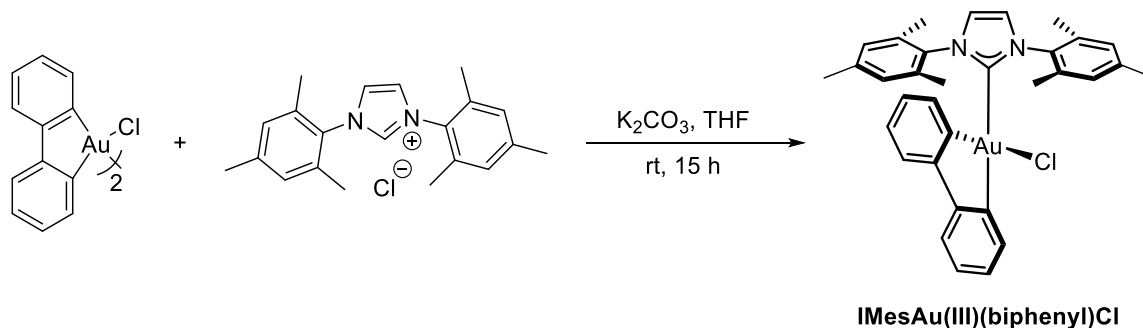

A mixture of (biphenyl)Au(III)Cl dimer (112.6 mg, 0.147 mmol), 1,3-dimesityl-1H-imidazol-3-ium chloride (101 mg, 0.294 mmol), and K<sub>2</sub>CO<sub>3</sub> (102 mg, 0.735 mmol, 2.5 equiv) was contained in a flask and purged with nitrogen gas. THF (6 mL) was added, and the reaction mixture was kept stirring for 15 h at rt. The mixture was filtered through celite, and product was purified by column chromatography with hexanes/EA = 5:1 as eluent to give a yellow solid (198 mg, 98% yield).

**3.3. General procedure for the preparation of (NHC)Au(III)(biphenyl)Cl** (For the C<sub>2</sub> symmetric NHC ligand):<sup>4</sup>

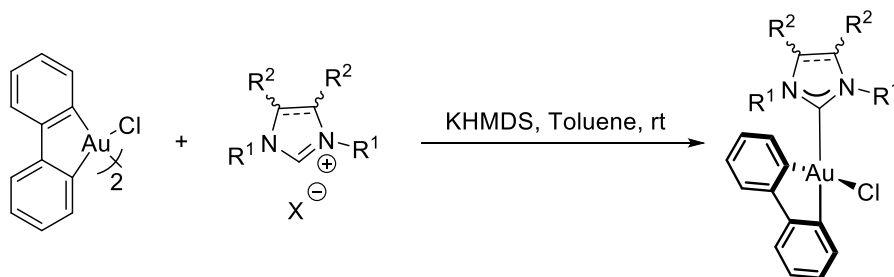

In a glovebox, to the imidazolium salt (1 equiv) in toluene (0.1 M) was added KHMDS (1.2 equiv) in one portion at rt. The reaction mixture was stirred for 2 h and then (biphenyl)Au(III)Cl dimer (0.5 equiv) was added in one portion. The reaction mixture was stirred for 8 h and then the reaction vessel was taken

---

out from the glovebox. The reaction mixture was then passed through celite and dried under vacuum to give the crude product, which was used as received.

### 3.4. Path A: General procedure for the synthesis of 1,2,4-triazolo NHC ligand coordinated Au(III) complexes (Take 4y as an example).

#### 3.4.1. Synthesis of 2-chloronaphthalen-1-amine.<sup>5</sup>

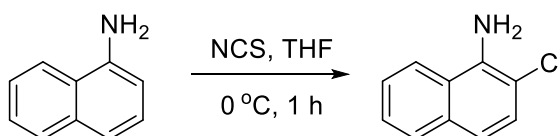

To a solution of naphthalen-1-amine (716 mg, 5.0 mmol) in anhydrous THF (50 mL) at 0 °C was added *N*-chlorosuccinimide (NCS, 668 mg, 5.0 mmol, 1.0 equiv.) in one portion. The ice bath was removed and the mixture was stirred for 1 h. The reaction was quenched with water and extracted with ethyl acetate (50 mL × 3). The combined organic phase was dried over sodium sulfate. The solvent was removed under vacuum and the crude product was purified by column chromatography (eluent: hexanes:EA = 5:1) to afford 2-chloronaphthalen-1-amine as a dark red solid (686 mg, 72 %). This unstable amine was used immediately for next step. <sup>1</sup>H NMR (400 MHz, CDCl<sub>3</sub>) δ 7.84 (d, *J* = 8.1 Hz, 1H), 7.79 (d, *J* = 7.5 Hz, 1H), 7.53 – 7.44 (m, 2H), 7.36 (d, *J* = 8.8 Hz, 1H), 7.28 – 7.25 (m, 1H), 4.90 (bs, 2H).

#### 3.4.2. Synthesis of (2-chloronaphthalen-1-yl)hydrazine hydrogen chloride.<sup>4b</sup>

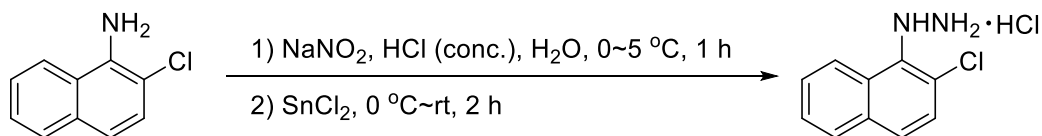

To a 100 mL-flask charged with a stir bar and 2-chloronaphthalen-1-amine (686 mg, 3.86 mmol), was added 8 mL concentrated HCl (12 M). NaNO<sub>2</sub> (320 mg, 4.63 mmol) in 5 mL water was cooled down to 0



°C, then added dropwise to the reaction mixture. After NaNO<sub>2</sub> was added, the reaction mixture was kept stirring at 0 °C for additional 1 h. SnCl<sub>2</sub> (1.46 g, 7.72 mmol) in 3 mL concentrated HCl (12 M) was cooled down to 0 °C and added slowly (note that when SnCl<sub>2</sub> was added, the reaction foamed), the resulting mixture was slowly warmed up to rt in 1 h. The suspension was filtered to collect the solid, washed with cold brine, then water and Et<sub>2</sub>O. The poorly soluble pale yellow solid was used for next step as received.

**3.4.3. Synthesis of (5a*S*,10*bS*)-2-(2-chloronaphthalen-1-yl)-2,5a,6,10*b*-tetrahydro-4*H*-indeno[2,1-*b*][1,2,4]triazolo[4,3-*d*][1,4]oxazin-11-ium chloride.**

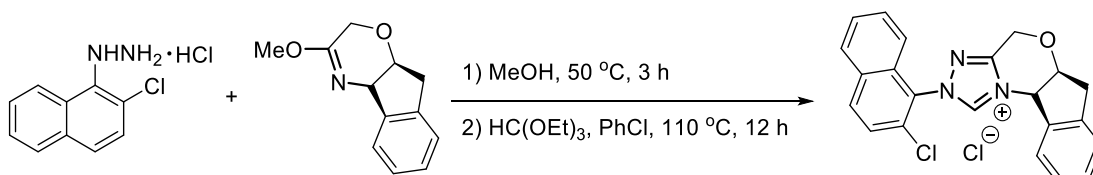

To a flame-dried 10-mL flask was added (4*aS*,9*aS*)-3-methoxy-2,4*a*,9,9*a*-tetrahydroindeno[2,1-*b*][1,4]oxazine (80 mg, 0.4 mmol), (2-chloronaphthalen-1-yl)hydrazine hydrogen chloride (92 mg, 0.4 mmol), and dry MeOH (3 mL). The resulting mixture was heated to 50 °C for 3 h, cooled down and the solvent was removed under reduced pressure. HC(OEt)<sub>3</sub> (1 mL, excess) and PhCl (2 mL) were added, then the reaction mixture was heated to 110 °C for 5 h. Cooled down, and 10 mL of hexanes added. The solid was collected by filtration and washed with Et<sub>2</sub>O. The received solid was used directly for next step.

#### 3.4.4. Synthesis of Complex 4y.

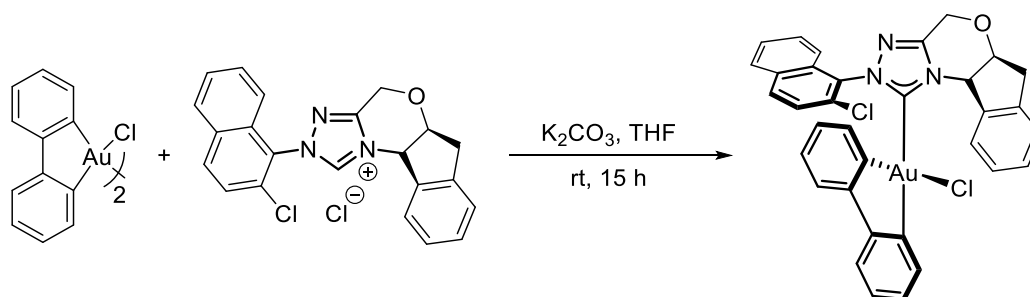

A mixture of (biphenyl)Au(III)Cl dimer (63 mg, 0.15 mmol), (5a*S*,10b*S*)-2-(2-chloronaphthalen-1-yl)-2,5a,6,10b-tetrahydro-4*H*-indeno[2,1-*b*][1,2,4]triazolo[4,3-*d*][1,4] oxazin-11-ium chloride (58 mg, 0.15 mmol), and K<sub>2</sub>CO<sub>3</sub> (42 mg, 0.3 mmol, 2.0 equiv) in a 10 mL Schlenk tube was purged with nitrogen gas, then THF (5 mL) was added, and the reaction mixture was kept stirring for 15 h at rt. The resulting mixture was filtered and washed with DCM, after removing the solvent under reduced pressure, the collected solid (112 mg, 98% yield) was composed of four isomers with a ratio of 1.00: 0.15: 1.57: 3.30 (corresponding chemical shifts: 8.44 / 8.39 / 8.18 / 8.12 ppm). The four isomers can be separated by TLC with hexanes/EA = 2:1; however, separation of the isomers by preparative TLC or column chromatography was less successful, because the isomers quickly formed equilibrium in solution. By carefully running a column chromatography with hexanes/EA = 10:1, we successfully obtained one of the major isomers, which was assumed to be the most stable isomer. The product purified by PTLC or column chromatography was dissolved in DCM, then dropwise added to hexanes, the resulting precipitate was collected by filtration, dried and used as catalyst.

<sup>1</sup>H NMR (600 MHz, CD<sub>2</sub>Cl<sub>2</sub>) δ 8.12 (d, *J* = 8.5 Hz, 1H), 7.90 (dd, *J* = 11.0, 8.9 Hz, 2H), 7.86 (d, *J* = 7.7 Hz, 1H), 7.81 (d, *J* = 7.8 Hz, 1H), 7.66 (t, *J* = 7.2 Hz, 1H), 7.56 (t, *J* = 7.2 Hz, 1H), 7.52 (d, *J* = 8.9 Hz, 1H), 7.41 (d, *J* = 6.7 Hz, 1H), 7.34 (d, *J* = 7.5 Hz, 1H), 7.24 (t, *J* = 7.5 Hz, 1H), 7.22 – 7.20 (m, 1H), 7.16 (d, *J* = 6.3 Hz, 1H), 7.08 (t, *J* = 7.0 Hz, 1H), 7.01 (dd, *J* = 7.4, 6.2 Hz, 1H), 6.93 (dt, *J* = 7.4, 6.9 Hz, 2H), 6.88 (d, *J* = 3.6 Hz,

1H), 6.85 (td,  $J = 7.6, 1.5$  Hz, 1H), 5.27 (d,  $J = 16.3$  Hz, 1H), 5.08 (d,  $J = 16.3$  Hz, 1H), 4.99 (t,  $J = 4.1$  Hz, 1H), 3.44 (dd,  $J = 16.8, 4.4$  Hz, 1H), 3.28 (d,  $J = 16.8$  Hz, 1H).  $^{13}\text{C}$  NMR (126 MHz,  $\text{CDCl}_3$ )  $\delta$  158.14, 153.18, 152.87, 149.44, 140.18, 137.41, 135.10, 132.93, 132.48, 132.26, 131.77, 130.15, 130.05, 128.92, 128.84, 128.07, 127.67, 127.56, 127.46, 127.20, 126.94, 126.83, 126.57, 125.49, 124.62, 123.92, 121.56, 120.66, 78.50, 62.39, 37.47, 31.60. HRMS ( $m/z$ ): calculated for  $\text{C}_{34}\text{H}_{24}\text{AuCl}_2\text{N}_3\text{NaO}$  [ $\text{M} + \text{Na}$ ] $^+$ , 780.0854; observed, 780.0837.

The  $^1\text{H}$ - $^1\text{H}$  COSY and 2D-NOESY analysis showed that the structure of the isomer 4y-1 (likely the most stable isomer) is as followed:

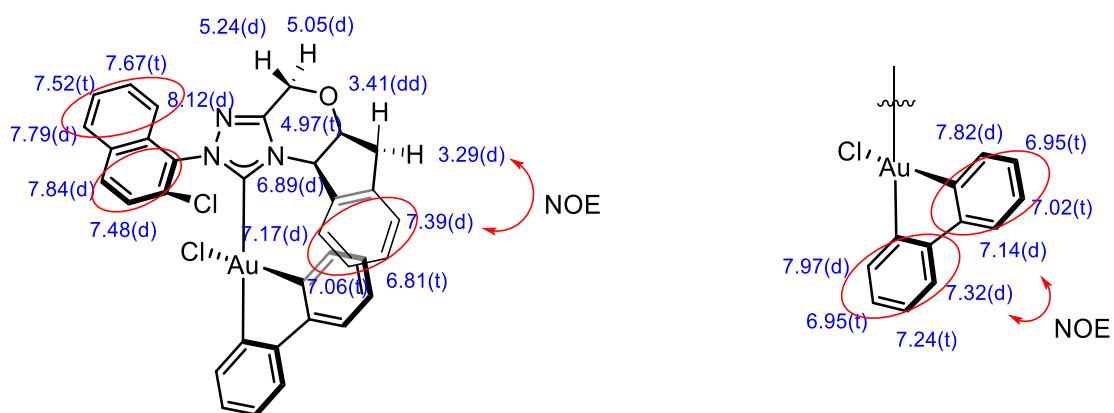

$^1\text{H}$ - $^1\text{H}$  COSY spectrum of **4y-1**:

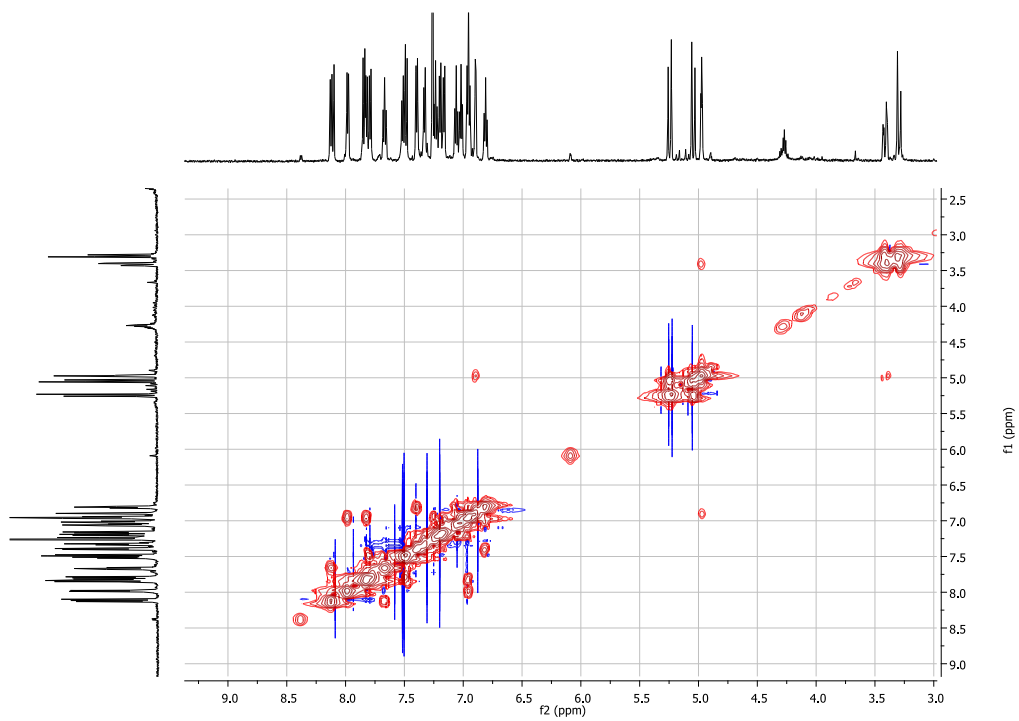

2D-NOESY spectrum of **4y-1**:

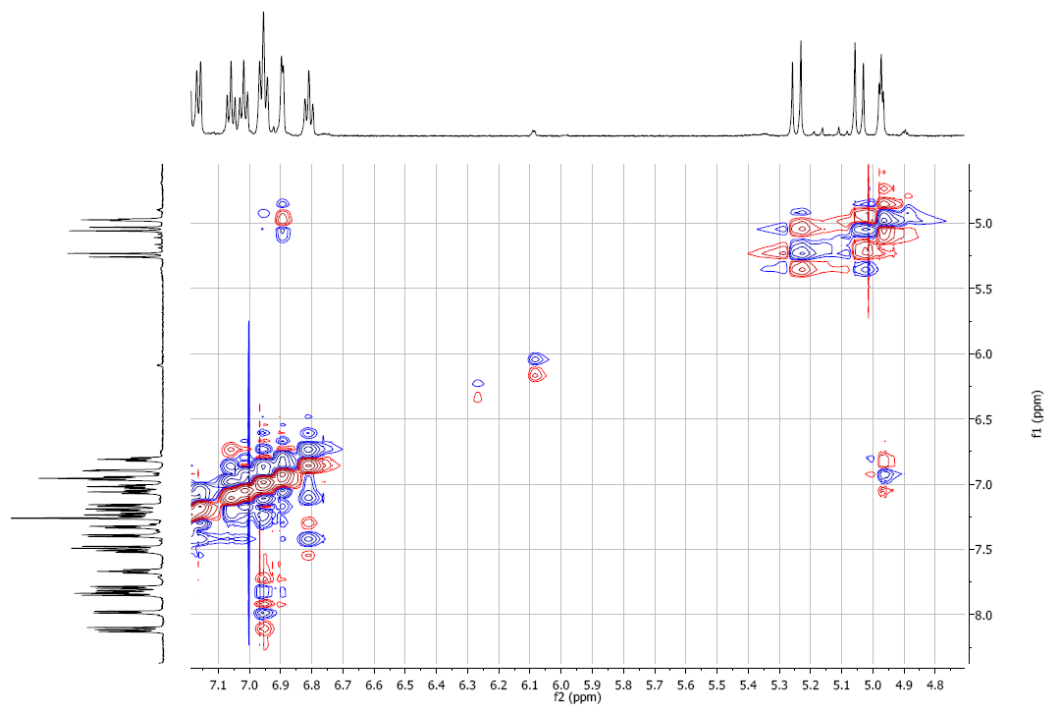

2D-NOESY spectrum of **4y-1**:

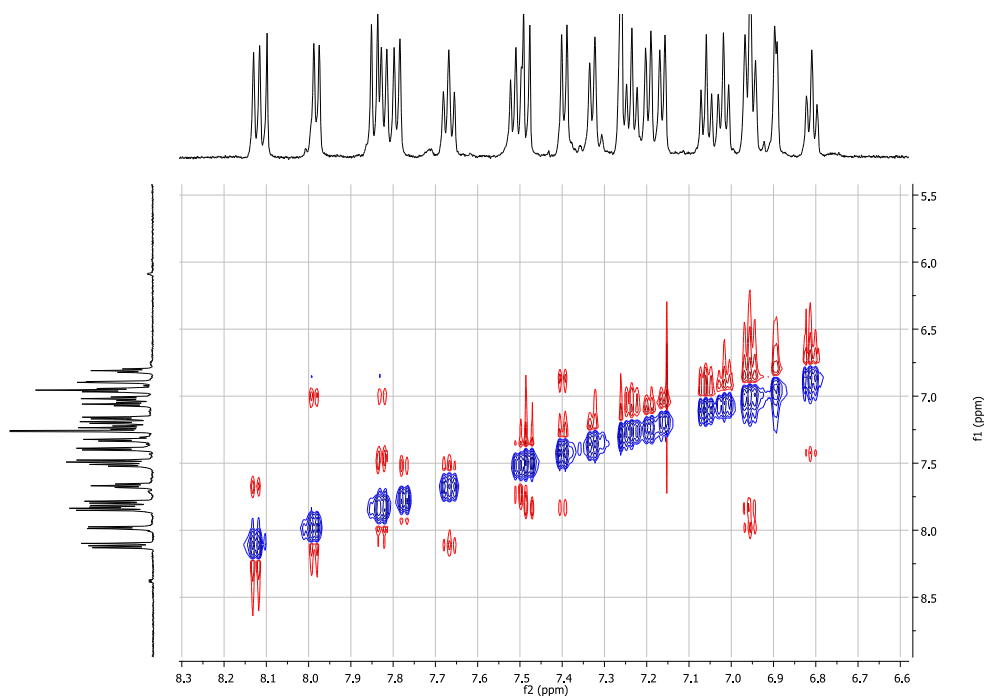

2D-NOESY spectrum of **4y-1**:

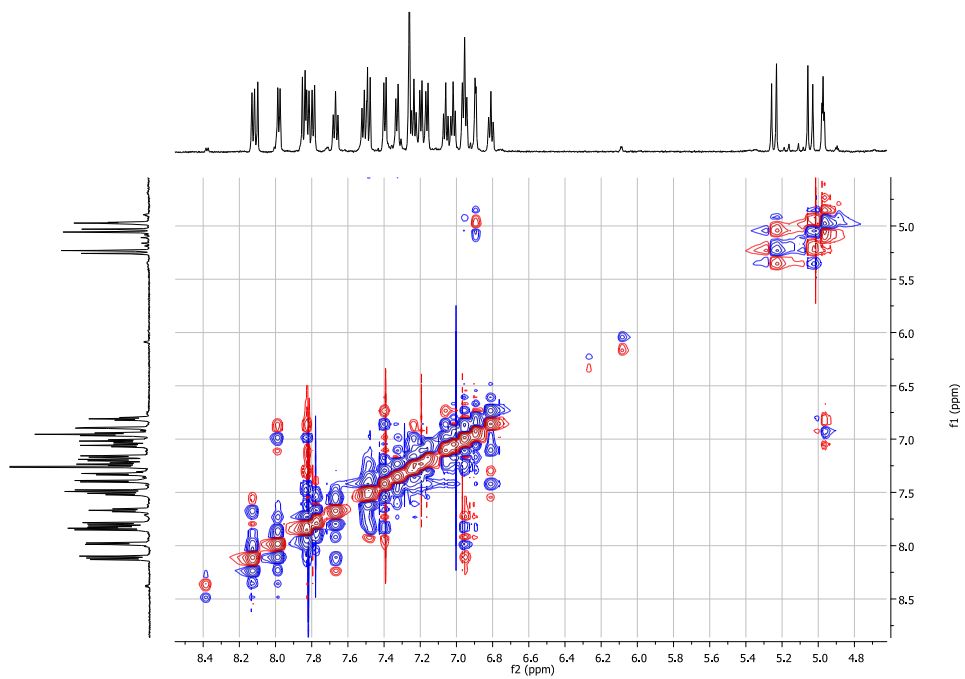

**3.5. Path B: General procedure for the synthesis of 1,2,4-triazolo NHC ligand coordinated Au(III) complexes (Take 4z as an example).**

**3.5.1. Synthesis of di-tert-butyl 1-(1,2,3,4,5,6,7,8-octahydroanthracen-9-yl)hydrazine-1,2-dicarboxylate.**

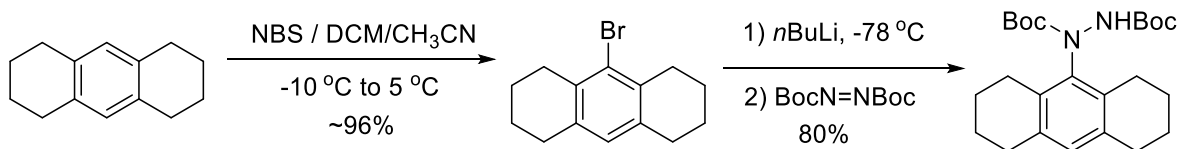

Step 1: 1,2,3,4,5,6,7,8-Octahydroanthracene (2.72 g, 14.6 mmol) was added to a 50-mL flask, 20 mL of DCM and CH<sub>3</sub>CN (v/v = 1:1) were added. The solution was cooled down to -10 °C (an ice/EtOH bath), NBS (2.55 g, 14.3 mmol) was added slowly in 30 min. Note: to reduce the dibromonation side reaction, lower NBS loadings were employed. The reaction was kept stirring at -10~5 °C for 7 h, quenched with Na<sub>2</sub>S<sub>2</sub>O<sub>3</sub> (sat. aq.), the mixture was extracted with Et<sub>2</sub>O (30 mL × 3) and dried over MgSO<sub>4</sub>. After removing the solvent under reduced pressure, the residue was purified by column chromatography with hexanes as eluent to give product containing some 1,2,3,4,5,6,7,8-octahydroanthracene, which was used in the next step.

Step 2: The product of the first step (3.86 g, 96% purity, 14 mmol) was dissolved in 20 mL of THF and added into a 50-mL flask. The resulting mixture was cooled down to -78 °C, <sup>n</sup>BuLi (5.6 mL, 2.5 M in hexane) was added slowly. The resulting mixture was kept stirring at -78 °C for additional 1 h, then di-*tert*-butyl (*E*)-diazene-1,2-dicarboxylate (3.22 g, 14 mmol) was dissolved in 7 mL of THF and added slowly. The reaction stirred at -78 °C for an additional 1 h and then the reaction was quenched with water. The material was extracted with EA (50 mL × 3) and dried over MgSO<sub>4</sub>. After removing the solvent under reduced pressure, the residue was purified by column chromatography with hexanes/EA = 3:1 to give

the product di-*tert*-butyl 1-(1,2,3,4,5,6,7,8-octahydroanthracen-9-yl)hydrazine-1,2-dicarboxylate as a white solid (4.66 g, 80% yield). (Note that the 1,2,3,4,5,6,7,8-octahydroanthracene impurity containing in the starting material could be easily removed by column chromatography at this step.) <sup>1</sup>H NMR (500 MHz, CDCl<sub>3</sub>) δ 6.80 (s, 1H), 6.54 (s, 1H), 2.92 (s, 2H), 2.71 (d, *J* = 5.8 Hz, 4H), 2.65 – 2.45 (m, 2H), 1.87 – 1.65 (m, 8H), 1.52 (s, 6H), 1.46 (s, 9H), 1.36 (s, 3H).

### 3.5.2. Synthesis of (1,2,3,4,5,6,7,8-octahydroanthracen-9-yl)hydrazine hydrochloride.

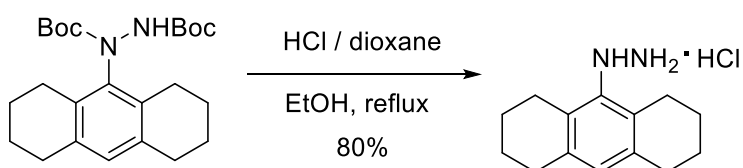

Di-*tert*-butyl 1-(1,2,3,4,5,6,7,8-octahydroanthracen-9-yl)hydrazine-1,2-dicarboxylate (4.66 g, 11.2 mmol) was dissolved in 10 mL of anhydrous EtOH, 20 mL of HCl (1.5 M in 1,4-dioxane) was added at rt. The resulting solution was heated to reflux for 15 min. The solvent was mostly removed and Et<sub>2</sub>O (ca. 20 mL) added. The precipitate was collected by filtration and washed by Et<sub>2</sub>O to give a white solid, which was poorly soluble in MeOH or DMSO, and used without further purification.

### 3.5.3. Synthesis of (5a*S*,10*bR*)-2-(1,2,3,4,5,6,7,8-octahydroanthracen-9-yl)-5a,10*b*-dihydro-4*H*,6*H*-indeno[2,1-*b*][1,2,4]triazolo[4,3-*d*][1,4]oxazin-2-ium chloride.

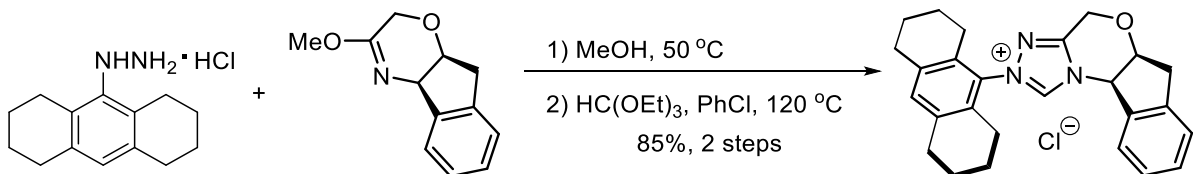

To a flame-dried 10-mL flask was added (4a*S*,9a*S*)-3-methoxy-2,4a,9,9a-tetrahydroindeno[2,1-*b*][1,4]oxazine (72 mg, 0.356 mmol), (1,2,3,4,5,6,7,8-octahydroanthracen-9-yl)hydrazine hydrochloride (90 mg, 0.356 mmol), and dry MeOH (3 mL). The resulting mixture was heated to 50 °C for 16 h, cooled down and the solvent was removed under reduced pressure. HC(OEt)<sub>3</sub> (1 mL, excess) and PhCl (2 mL) were added, then the reaction mixture was heated to 120 °C for 5 h. After cooling, 10 mL of toluene was added, the solid was collected by filtration and washed with toluene to give a brown solid. The received solid was used directly for next step. <sup>1</sup>H NMR (500 MHz, DMSO) δ 11.05 (s, 2H), 7.68 (d, *J* = 5.4 Hz, 1H), 7.38 – 7.23 (m, 4H), 6.98 (s, 1H), 6.70 (s, 1H), 5.02 (s, 1H), 4.74 (t, *J* = 4.3 Hz, 1H), 4.58 (d, *J* = 16.4 Hz, 1H), 4.46 (t, *J* = 13.6 Hz, 1H), 3.43 – 3.24 (m, 1H), 2.98 (d, *J* = 16.9 Hz, 1H), 2.76 – 2.67 (m, 8H), 1.79 – 1.55 (m, 8H).

#### 3.5.4. Synthesis of complex 4z.

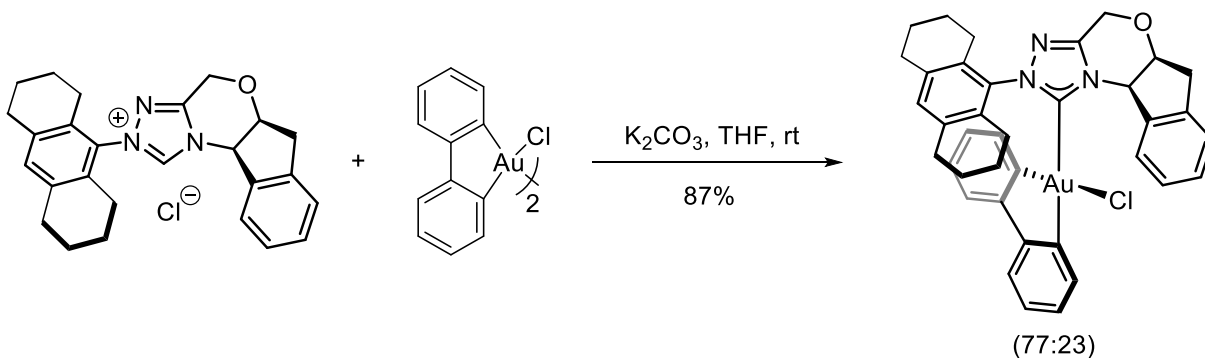

A mixture of (biphenyl)Au(III)Cl dimer (63 mg, 0.15 mmol), (5a*S*,10b*R*)-2-(1,2,3,4,5,6,7,8-octahydroanthracen-9-yl)-5a,10b-dihydro-4H,6H-indeno[2,1-*b*][1,2,4]triazolo[4,3-*d*][1,4] oxazin-2-ium chloride (65 mg, 0.15 mmol), and K<sub>2</sub>CO<sub>3</sub> (42 mg, 0.3 mmol, 2.0 equiv) in a 10 mL Schlenk tube was purged with nitrogen gas, then THF (5 mL) was added, and the reaction mixture was kept stirring for 15 h at rt. This mixture was filtered and washed with DCM. After removing the solvent under reduced pressure, the collected solid (102 mg, 87% yield) was composed of two isomers with a ratio of 77:23



(corresponding chemical shifts: 8.40 / 8.15 ppm). The two isomers cannot be separated by preparative TLC or column chromatography, because the isomers quickly formed equilibrium in solution.

### 3.5.5. X-ray crystallographic analysis of complex **4z**-NTf<sub>2</sub>.

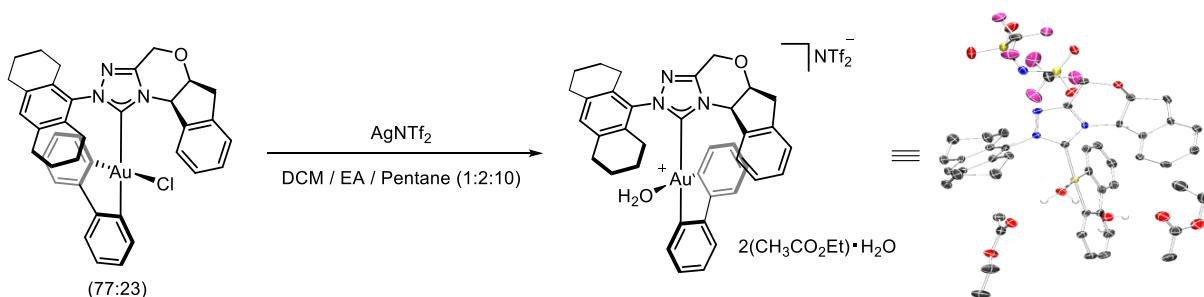

Complex **4z** (10 mg, 0.01279 mmol) and AgNTf<sub>2</sub> (4.96 mg, 0.01279 mmol) was dissolved in 0.5 mL of DCM/EA (1:2, v/v), after stirring at rt for 15 min, the mixture was passed through glass fiber into a 3 mL vial, then pentane (2 mL) was added slowly along the wall of the vial to the top of the solution. The vial was placed in a freezer (the temperature was kept between -20 °C ~ -10 °C) for 53 days, upon which time, needle-like crystals were formed. These were analyzed by X-ray crystallography. (Note that when other silver salts such as AgSbF<sub>6</sub> and AgOTf were used, no crystal was obtained)

## 4. Characterization of Products

**4.1 General procedure for Diels–Alder reaction of 2,4-hexadienal with cyclopentadiene (Take **4y** catalyzed ethyl (2*E*,4*E*)-6-oxohexa-2,4-dienoate (**1b**) with cyclopentadiene as an example).**

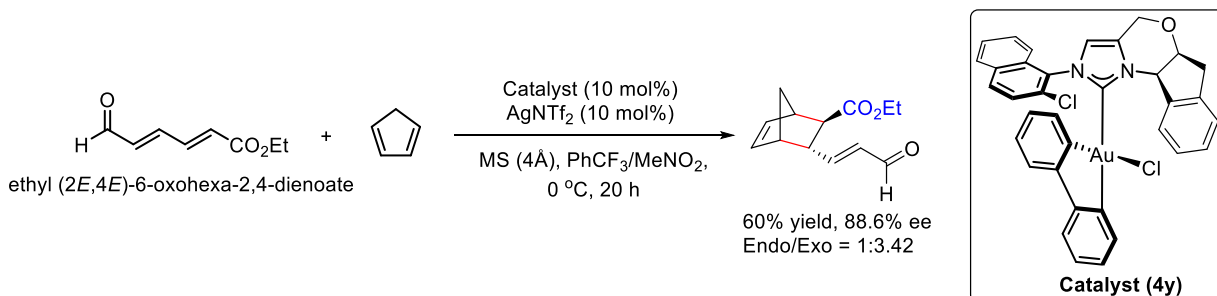

Au(III) catalyst **4y** (2.3 mg, 0.003 mmol, 10 mol%) and AgNTf<sub>2</sub> (1.2 mg, 0.003 mmol, 10 mol%) were added into a 3 mL vial, then dry PhCF<sub>3</sub> (200  $\mu$ L) and MeNO<sub>2</sub> (50  $\mu$ L) were added. The resulting mixture was stirred at rt for 15 min, 4 Å MS (ca. 20 mg) were added, and cooled to 0 °C. Ethyl (2*E*,4*E*)-6-oxohexa-2,4-dienoate (4.6 mg, 3.8  $\mu$ L, 0.03 mmol) and cyclopentadiene (35  $\mu$ L, 0.45 mmol, 15 equiv) were added via a syringe, the vial was capped and wound with parafilm. The mixture was cooled to 0 °C with an ice bath and kept stirring for 24 h. Then the reaction mixture was filtered by glass fiber, and the product was purified by preparative TLC with hexanes/EA = 5:1 as eluent to give product **3b** as a colorless liquid (4 mg, 60% yield).

### **Note:**

(1) Previous reports<sup>3,4a</sup> employed glass fiber to remove AgCl before adding substrates, we tested the reaction in the presence of AgCl and found almost no influence on the yield and selectivity. Therefore, we continued to use the procedure above without removal of AgCl.

(2) The product yields and ee of Diels-Alder reaction referred to the major diastereomer (isolated or  $^1\text{H}$  NMR yields), the minor isomer was often with the same  $R_f$  with double bond isomerized side-products of starting material (or unreacted starting material). The ratio of diastereomers and the side-products could be determined by  $^1\text{H}$  NMR.

(3) Other solvents, such as toluene was used, the operation was similar with this procedure. For rt temperature reactions, the capped vial was placed on a stir plate at rt.

(4) The purification of product can be performed on column chromatography with same eluent as preparative TLC. Specifically, when the reaction was scaled up to 1 mmol scale with 1 mol% catalyst loading, the product was isolated by column chromatography.

#### 4.2 Determination of Absolute Stereochemistry of **3b**

To determine the absolute configuration of the products, the enantioenriched compound **3b** was synthesized from configurationally well-defined compound **A**, which was reported in literature.<sup>6</sup> The following HPLC spectra were enantioenriched compound **3b** (synthesized from reported compound **A**) and mixture of enantioenriched compound **3b** and racemic compound **3b** (synthesized from our method). HPLC analysis of the mixture of racemic and enantioenriched compound **3b** showed the configuration of major enantiomer of the product was as drawn in the manuscript (Figure S1 and S2).

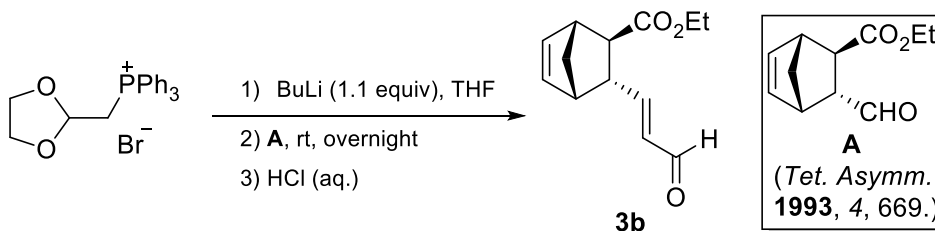

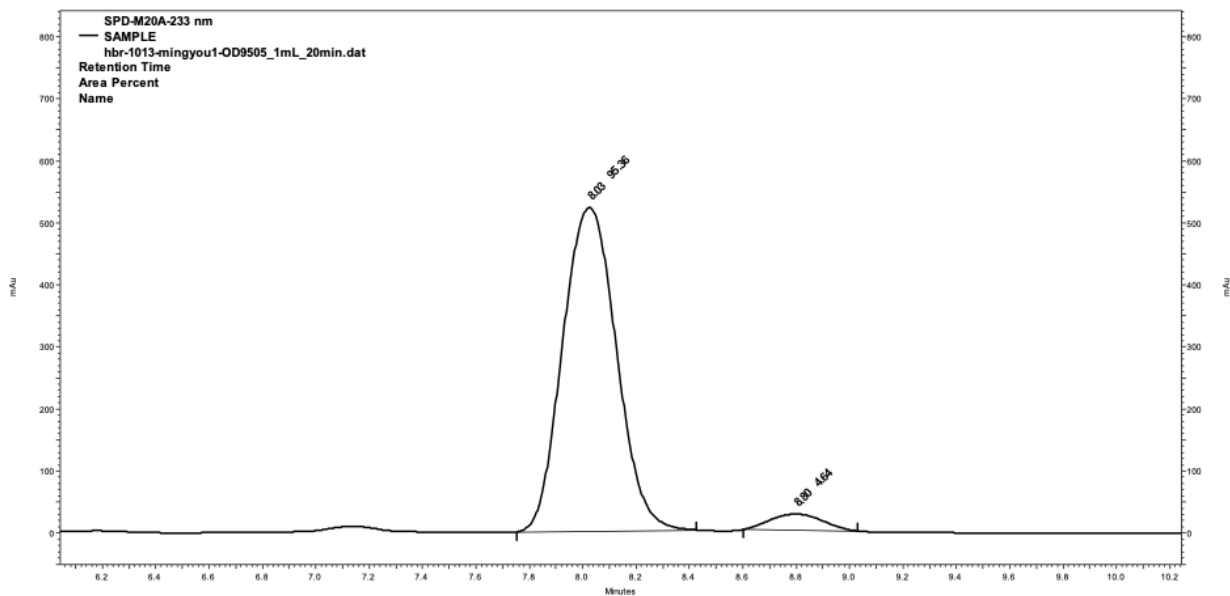

**Figure S1.** HPLC spectrum of enantioenriched compound **3b** synthesized from configurationally well-defined compound **A**.

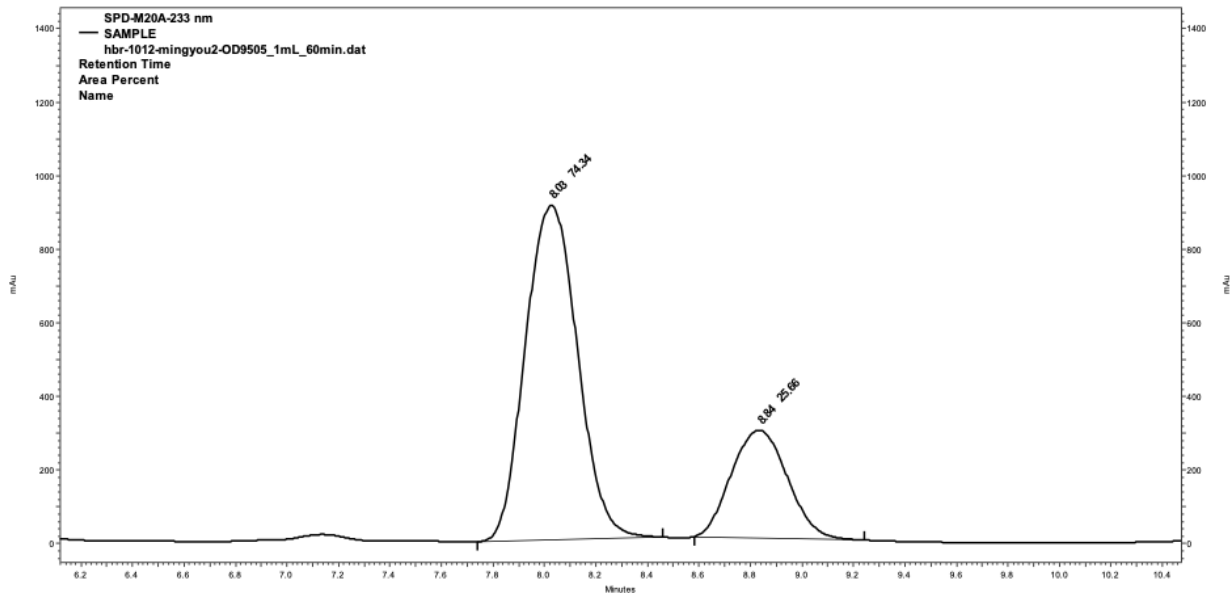

**Figure S2.** HPLC spectrum of mixed sample of enantioenriched compound **5b** and racemic compound **5b**.

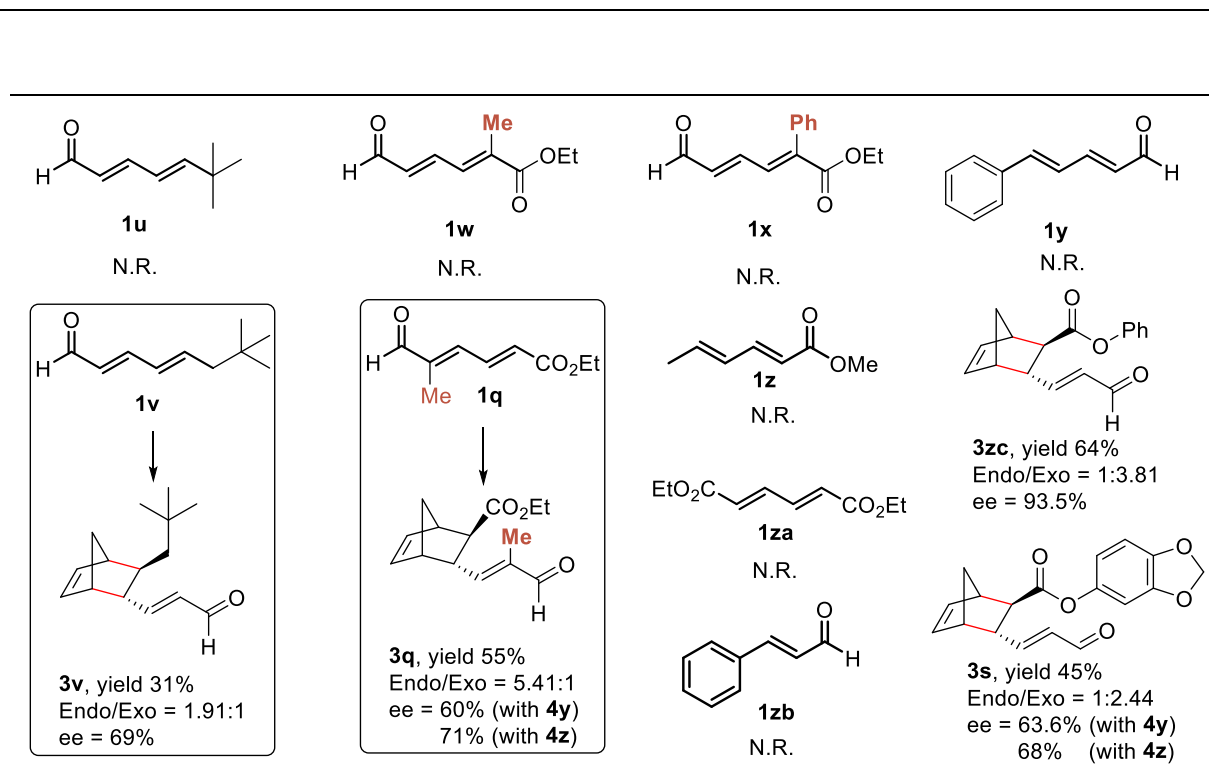

Dienes:

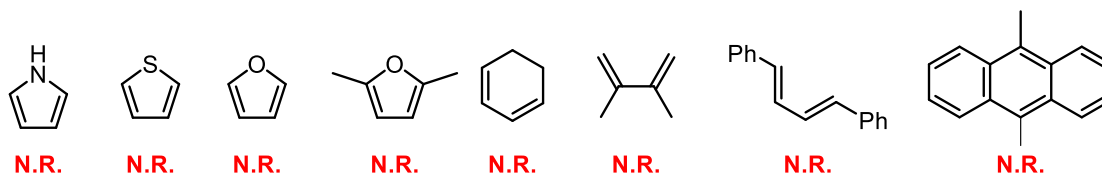

Table S1. Results with other substrates and catalyst.

Ethyl (1*R*,2*R*,3*R*,4*S*)-3-((*E*)-3-oxoprop-1-en-1-yl)bicyclo[2.2.1]hept-5-ene-2-carboxylate (**3b**):

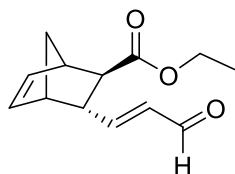

Colorless oil, 4.0 mg, 60% yield. <sup>1</sup>H NMR (600 MHz, CDCl<sub>3</sub>/TMS) δ 9.39 (d, *J* = 7.8 Hz, 1H), 6.45 (dd, *J* = 15.6, 8.2 Hz, 1H), 6.28 (dd, *J* = 5.3, 3.3 Hz, 1H), 6.12 – 6.04 (m, 2H), 4.11 (q, *J* = 7.1 Hz, 2H), 3.23 (dt, *J* = 8.1, 4.0 Hz, 1H), 3.09 (s, 1H), 2.98 (s, 1H), 2.06 (d, *J* = 4.7 Hz, 1H), 1.69 (d, *J* = 8.8 Hz, 1H), 1.49 (d, *J* = 8.8

Hz, 1H), 1.22 (t,  $J = 7.1$  Hz, 3H).  $^{13}\text{C}$  NMR (151 MHz,  $\text{CDCl}_3$ )  $\delta$  193.69, 174.19, 160.44, 137.76, 134.96, 132.82, 60.80, 50.12, 47.63, 47.50, 47.37, 47.21, 14.17. HRMS ( $m/z$ ): calculated for  $\text{C}_{13}\text{H}_{16}\text{NaO}_3[\text{M} + \text{Na}]^+$ , 243.0992; observed, 243.1002. HPLC (Chiralpak OD-H column, 95:5 hexanes/isopropanol, 1 ml/min),  $t_r = 8.65$  min (major), 9.44 min (minor); ee = 89%.

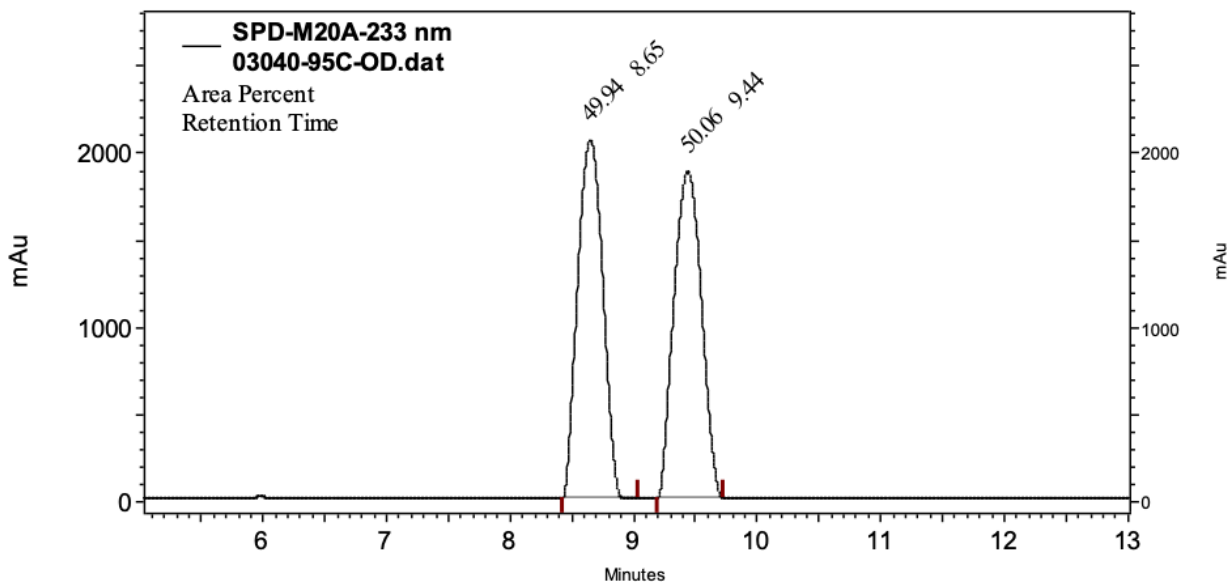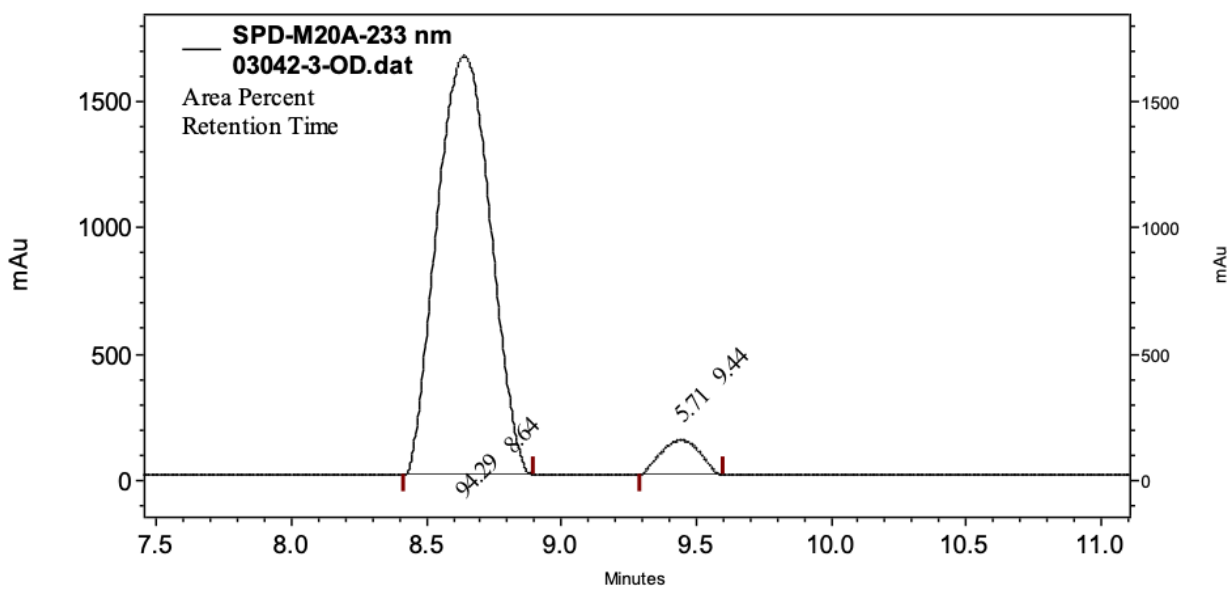

Methyl (1*R*,2*R*,3*R*,4*S*)-3-((*E*)-3-oxoprop-1-en-1-yl)bicyclo[2.2.1]hept-5-ene-2-carboxylate (3)

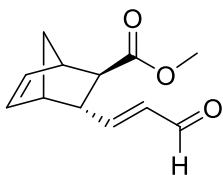

Colorless oil, 4.0 mg, 65% yield.  $^1\text{H}$  NMR (700 MHz,  $\text{CDCl}_3$ )  $\delta$  9.44 (d,  $J = 7.8$  Hz, 1H), 6.49 (dd,  $J = 15.6$ , 8.2 Hz, 1H), 6.32 (dd,  $J = 5.6$ , 3.2 Hz, 1H), 6.17 – 6.10 (m, 2H), 3.71 (s, 3H), 3.28 (dt,  $J = 8.2$ , 4.1 Hz, 1H), 3.14 (s, 1H), 3.03 (s, 1H), 2.12 (dd,  $J = 4.8$ , 1.3 Hz, 1H), 1.74 (d,  $J = 8.8$  Hz, 1H), 1.60 (s, 0H), 1.55 (dd,  $J = 8.8$ , 1.5 Hz, 1H).  $^{13}\text{C}$  NMR (176 MHz,  $\text{CDCl}_3$ )  $\delta$  193.78, 174.80, 160.32, 137.80, 135.05, 132.96, 52.15, 50.03, 47.76, 47.61, 47.44, 47.31. HRMS ( $m/z$ ): calculated for  $\text{C}_{12}\text{H}_{14}\text{NaO}_3[\text{M} + \text{Na}]^+$ , 229.0835; observed, 229.0824. HPLC (Chiralpak OD-H column, 98:2 hexanes/isopropanol, 1 ml/min),  $t_r = 19.90$  min (major), 21.15 min (minor); ee = 81%.

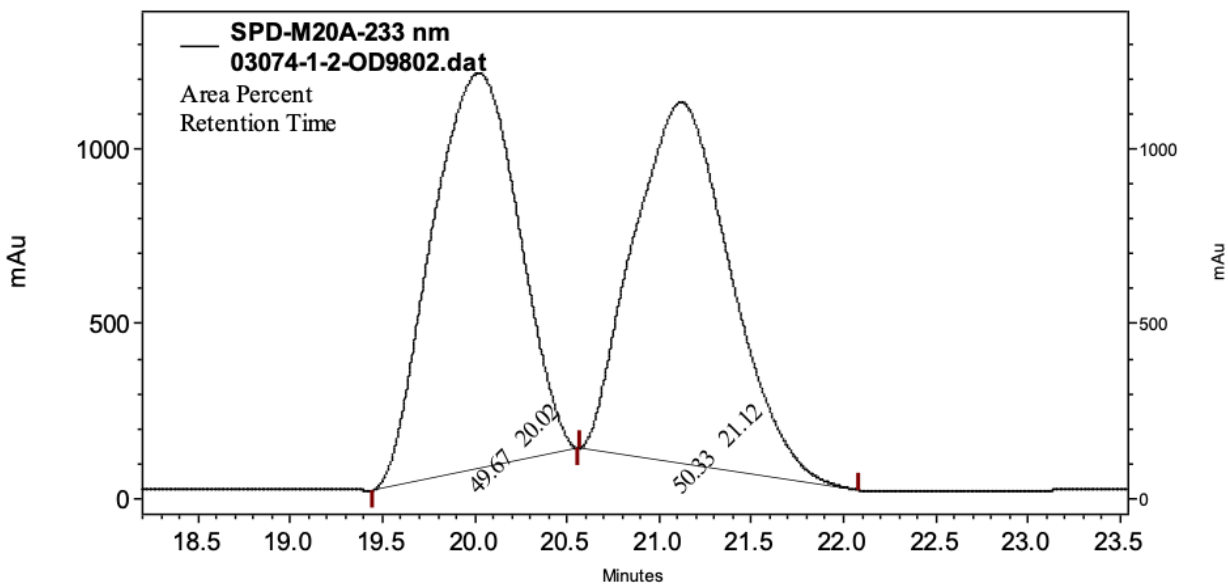

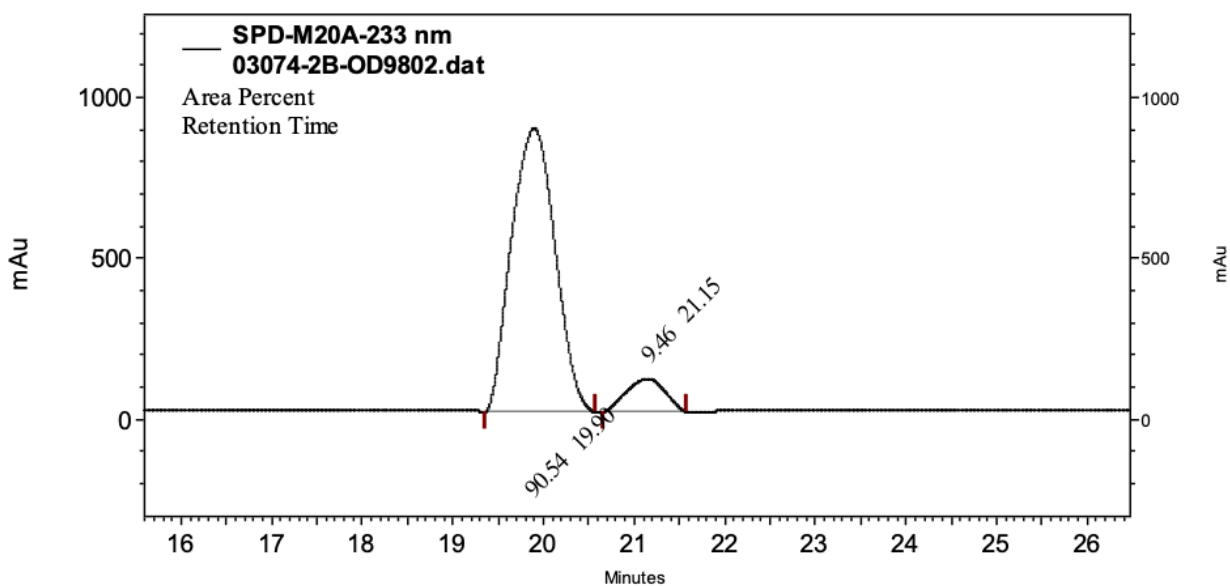

***tert*-Butyl (1*R*,2*R*,3*R*,4*S*)-3-((*E*)-3-oxoprop-1-en-1-yl)bicyclo[2.2.1]hept-5-ene-2-carboxylate (3d):**

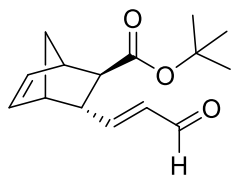

An inseparable mixture with side-product. The product yield was determined by  $^1\text{H}$  NMR. HPLC (Chiralpak OD-H column, 95:5 hexanes/isopropanol, 1 ml/min),  $t_r$  = 6.20 min (major), 6.65 min (minor); ee = 98%.



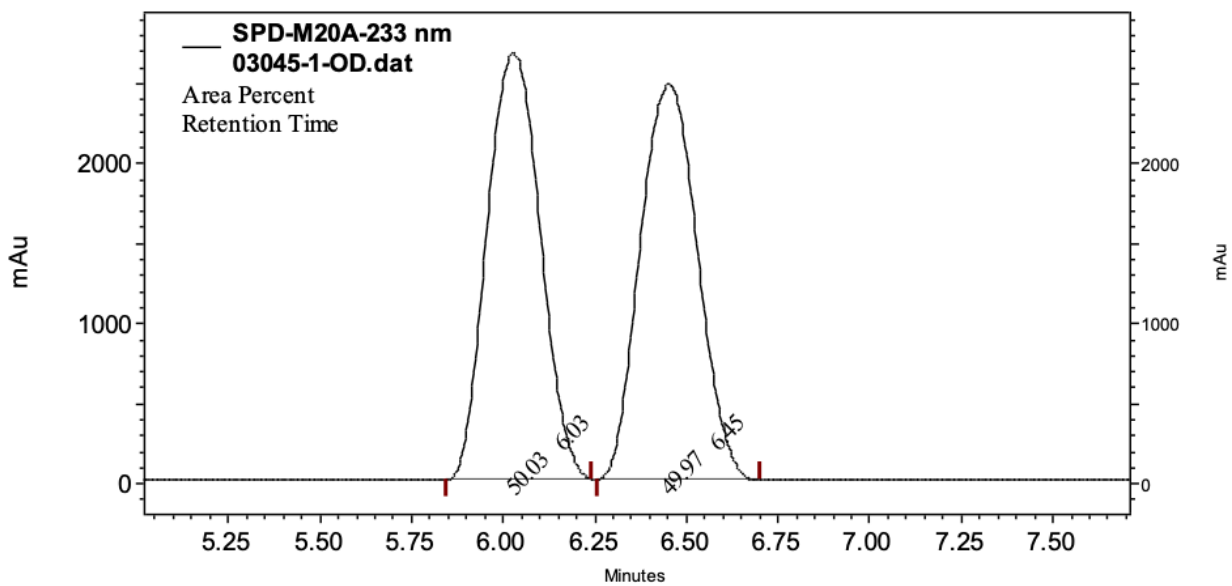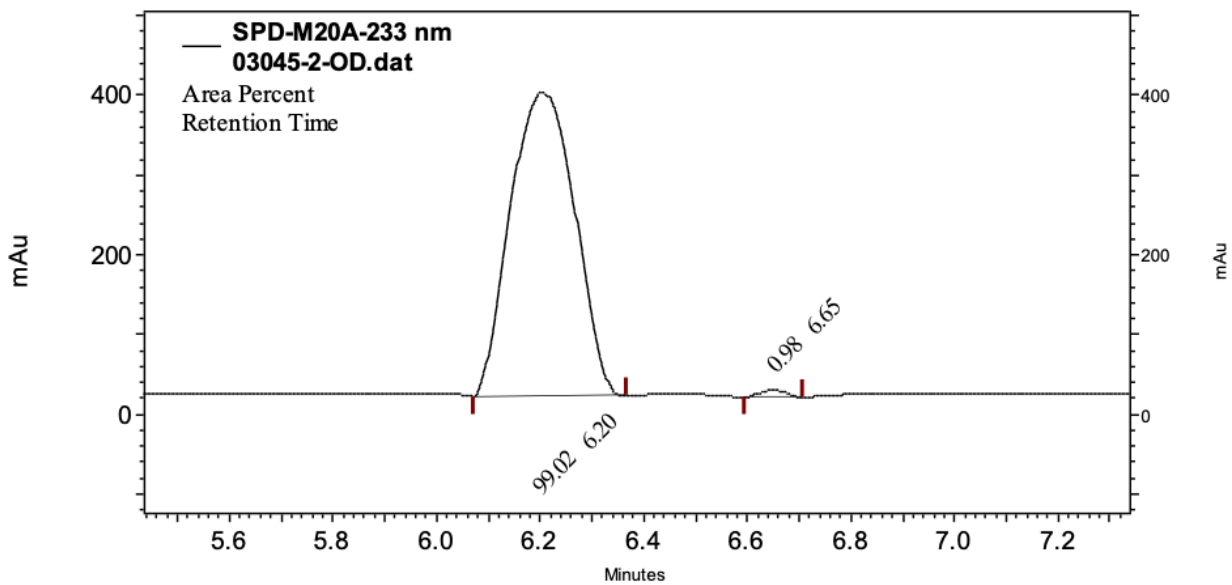

**Decyl (1*R*,2*R*S,3*R*,4*S*)-3-((*E*)-3-oxoprop-1-en-1-yl)bicyclo[2.2.1]hept-5-ene-2-carboxylate (3e):**

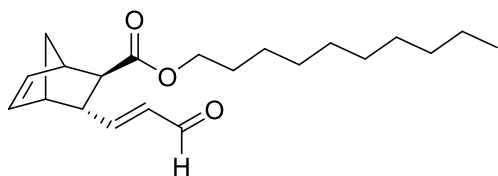

An inseparable mixture with side-product. The product yield was determined by  $^1\text{H}$  NMR. HPLC (Chiralpak OD-H column, 95:5 hexanes/isopropanol, 1 ml/min),  $t_r$  = 27.37 min (minor), 29.91 min (major); ee = 72%.

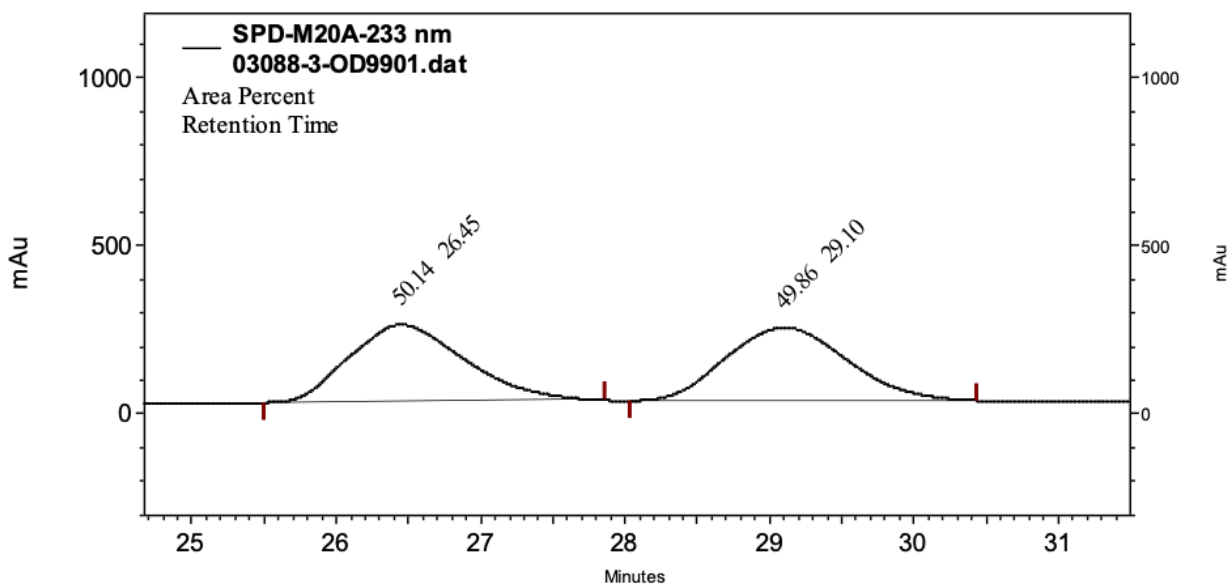

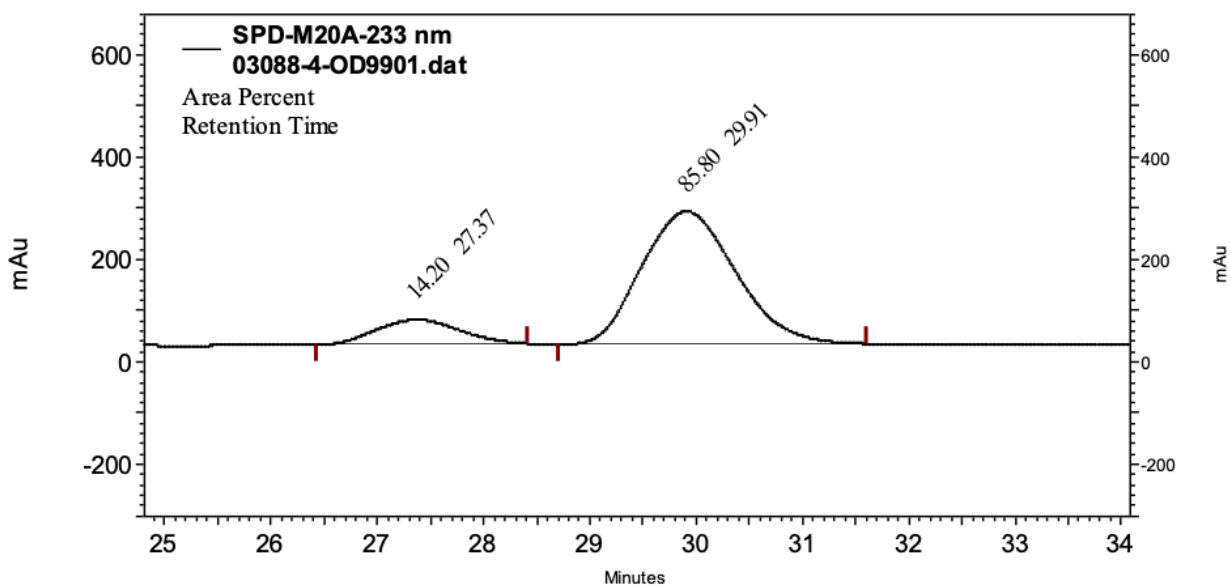

**Isopentyl (1*R*,2*R*,3*R*,4*S*)-3-((*E*)-3-oxoprop-1-en-1-yl)bicyclo[2.2.1]hept-5-ene-2-carboxylate (3f):**

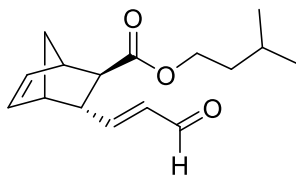

Colorless oil, 4.7 mg, 60% yield.  $^1\text{H}$  NMR (500 MHz,  $\text{CDCl}_3$ )  $\delta$  9.44 (d,  $J = 7.8$  Hz, 1H), 6.49 (dd,  $J = 15.6$ , 8.3 Hz, 1H), 6.32 (dd,  $J = 5.5$ , 3.2 Hz, 1H), 6.17 – 6.07 (m, 2H), 4.12 (t,  $J = 6.9$  Hz, 2H), 3.27 (dt,  $J = 8.1$ , 3.9 Hz, 1H), 3.13 (s, 1H), 3.02 (s, 1H), 2.13 – 2.07 (m, 1H), 1.77 – 1.60 (m, 2H), 1.55-1.50 (m, 3H), 0.91 (d,  $J = 6.6$  Hz, 6H).  $^{13}\text{C}$  NMR (126 MHz,  $\text{CDCl}_3$ )  $\delta$  193.87, 174.41, 160.60, 137.87, 135.03, 132.91, 63.67, 50.25, 47.77, 47.62, 47.43, 47.36, 37.31, 25.12, 22.48. HRMS ( $m/z$ ): calculated for  $\text{C}_{16}\text{H}_{22}\text{NaO}_3[\text{M} + \text{Na}]^+$ , 285.1461; observed, 285.1477. HPLC (Chiralpak OD-H column, 98:2 hexanes/isopropanol, 1 ml/min),  $t_r = 7.00$  min (major), 7.39 min (minor); ee = 94%.

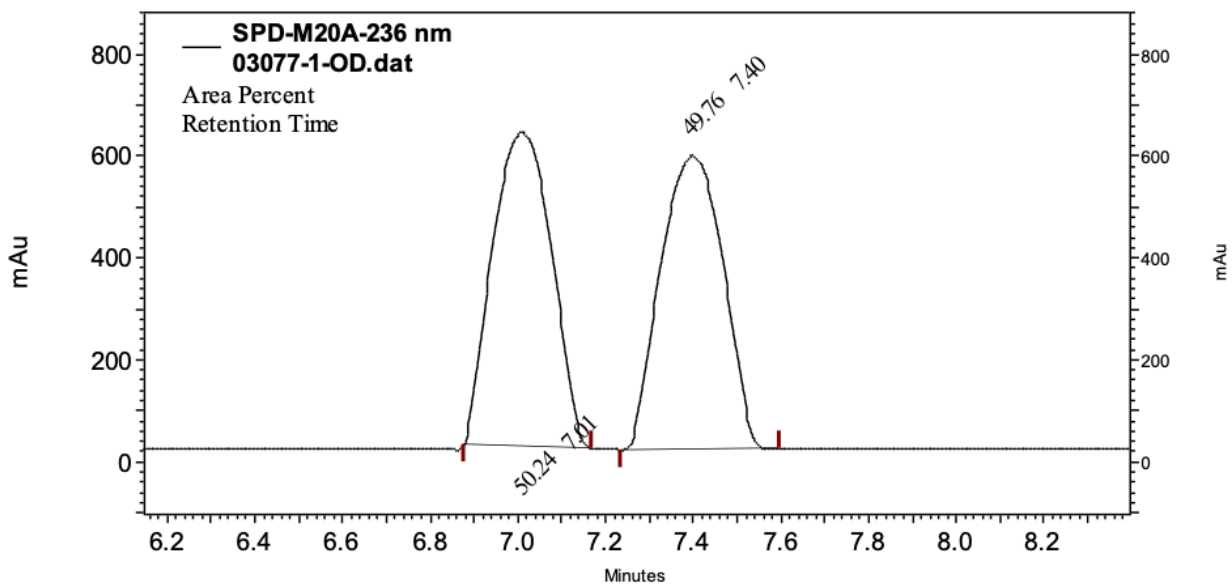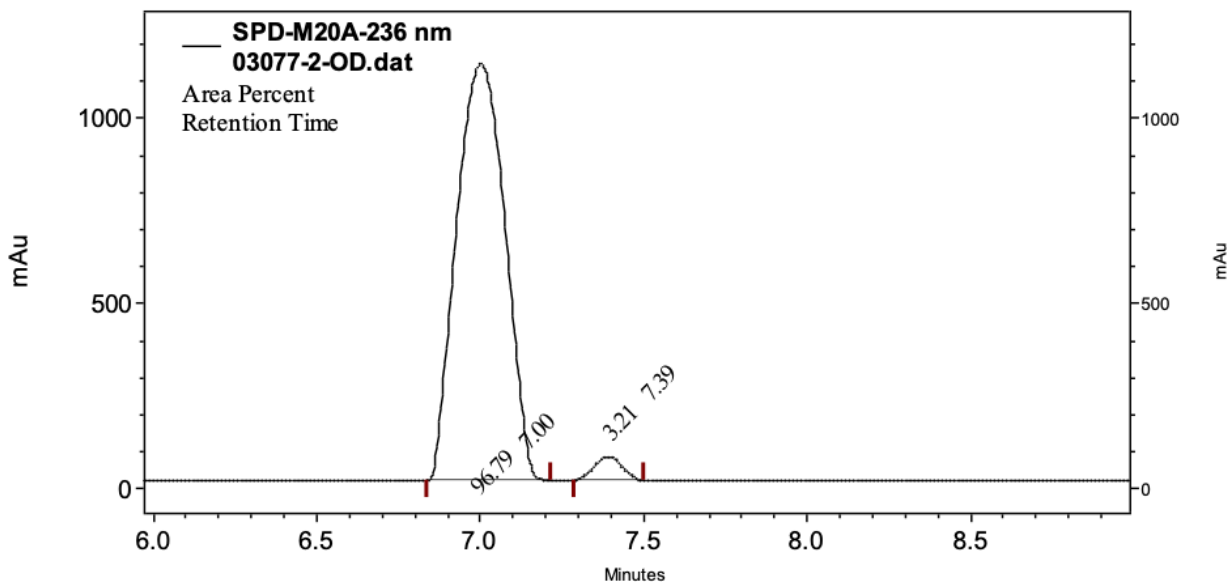

**Benzyl (1*R*,2*R*,3*R*,4*S*)-3-((*E*)-3-oxoprop-1-en-1-yl)bicyclo[2.2.1]hept-5-ene-2-carboxylate (3g):**

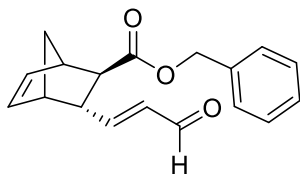

Colorless oil, 6.7 mg, 79% yield.  $^1\text{H}$  NMR (700 MHz,  $\text{CDCl}_3$ )  $\delta$  9.44 (d,  $J = 7.8$  Hz, 1H), 7.41 – 7.27 (m, 5H), 6.48 (dd,  $J = 15.6, 8.3$  Hz, 1H), 6.32 (dd,  $J = 5.2, 3.3$  Hz, 1H), 6.13 (ddd,  $J = 23.4, 10.5, 5.2$  Hz, 2H), 5.15 (s, 2H), 3.29 (dt,  $J = 8.0, 3.9$  Hz, 1H), 3.16 (s, 1H), 3.03 (s, 1H), 2.18 (d,  $J = 4.5$  Hz, 1H), 1.74 (d,  $J = 8.8$  Hz, 1H), 1.55 (d,  $J = 8.8$  Hz, 1H).  $^{13}\text{C}$  NMR (176 MHz,  $\text{CDCl}_3$ )  $\delta$  193.76, 174.14, 160.30, 137.81, 135.82, 135.11, 132.99, 128.67, 128.38, 128.16, 66.75, 50.18, 47.76, 47.67, 47.48, 47.38. HRMS ( $m/z$ ): calculated for  $\text{C}_{18}\text{H}_{18}\text{NaO}_3$  [ $\text{M} + \text{Na}$ ] $^+$ , 305.1148; observed, 305.1139. HPLC (Chiralpak OD-H column, 95:5 hexanes/isopropanol, 1 ml/min),  $t_r = 14.72$  min (major), 16.91 min (minor); ee = 87%.

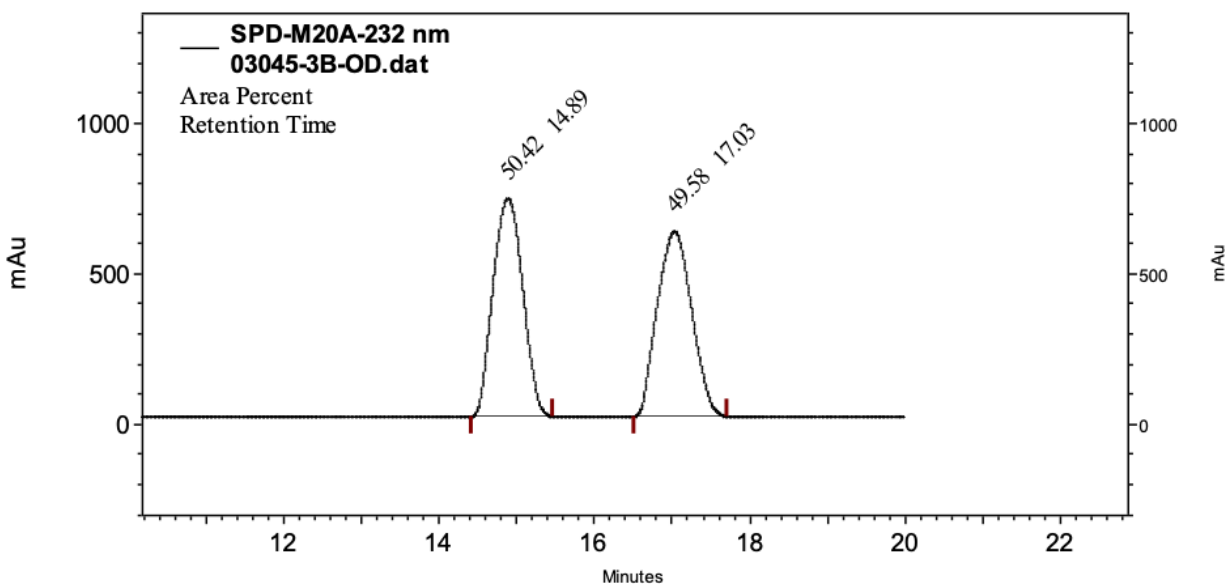

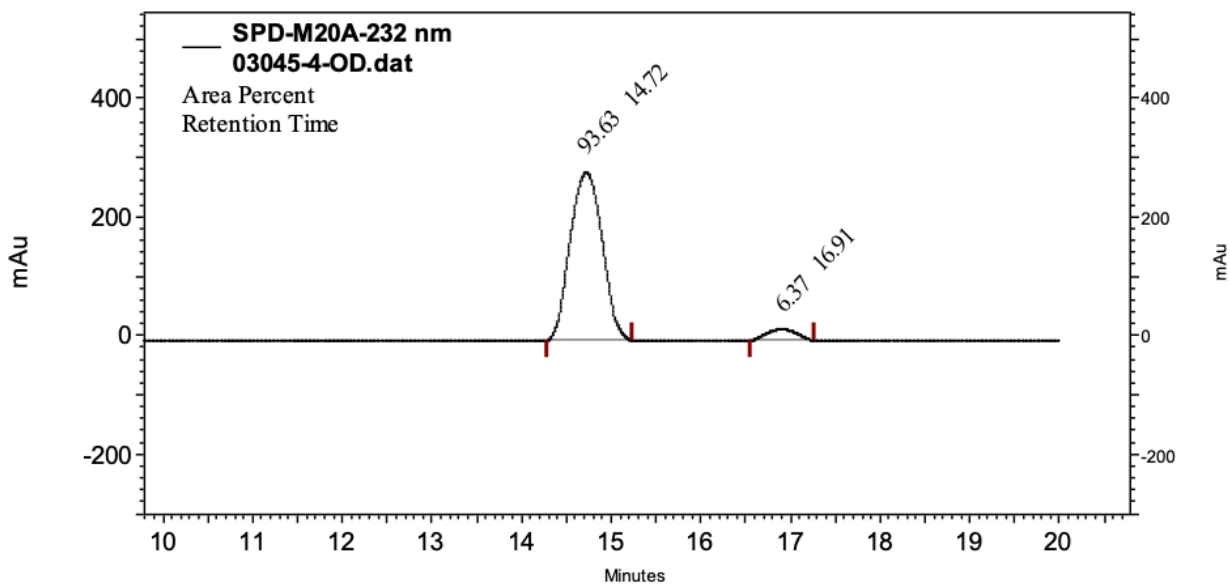

**Phenethyl (1*R*,2*R*,3*R*,4*S*)-3-((*E*)-3-oxoprop-1-en-1-yl)bicyclo[2.2.1]hept-5-ene-2-carboxylate (3h):**

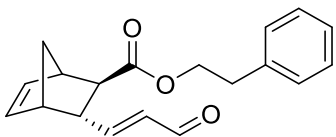

Colorless oil, 7.7 mg, 87% yield.  $^1\text{H}$  NMR (700 MHz,  $\text{CDCl}_3$ )  $\delta$  9.43 (d,  $J = 7.8$  Hz, 1H), 7.30 (t,  $J = 7.4$  Hz, 2H), 7.23 (t,  $J = 7.4$  Hz, 1H), 7.20 (d,  $J = 7.6$  Hz, 2H), 6.45 (dd,  $J = 15.6, 8.2$  Hz, 1H), 6.30 (d,  $J = 3.4$  Hz, 1H), 6.15 – 6.11 (m, 1H), 6.06 (dd,  $J = 15.6, 7.8$  Hz, 1H), 4.39 – 4.31 (m, 2H), 3.20 – 3.16 (m, 1H), 3.08 (s, 1H), 2.99 (s, 1H), 2.95 (t,  $J = 6.9$  Hz, 2H), 2.08 (d,  $J = 4.6$  Hz, 1H), 1.66 (d,  $J = 8.8$  Hz, 1H), 1.51 (d,  $J = 8.8$  Hz, 1H).  $^{13}\text{C}$  NMR (176 MHz,  $\text{CDCl}_3$ )  $\delta$  193.80, 174.23, 160.39, 137.78, 137.60, 135.04, 132.91, 128.89, 128.55, 126.68, 65.24, 50.15, 47.79, 47.58, 47.32, 47.29, 35.10. HRMS ( $m/z$ ): calculated for  $\text{C}_{18}\text{H}_{18}\text{NaO}_3$   $[\text{M} + \text{Na}]^+$ , 319.1305; observed, 319.1312. HPLC (Chiralpak OD-H column, 95:5 hexanes/isopropanol, 1 ml/min),  $t_r = 15.62$  min (major), 17.22 min (minor); ee = 77%.

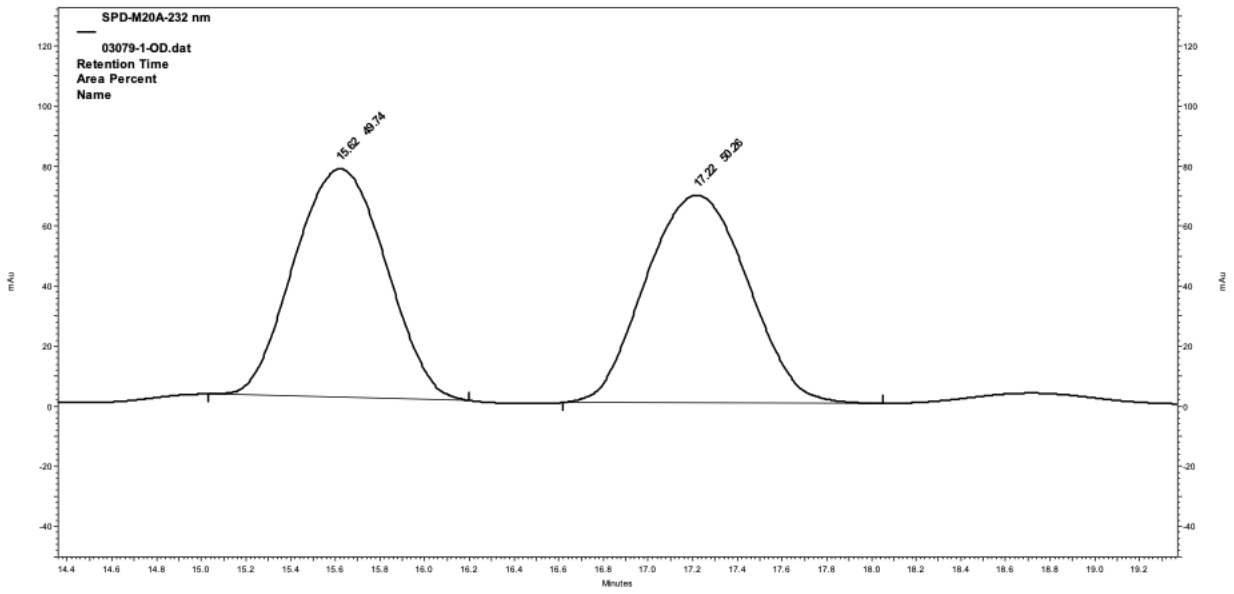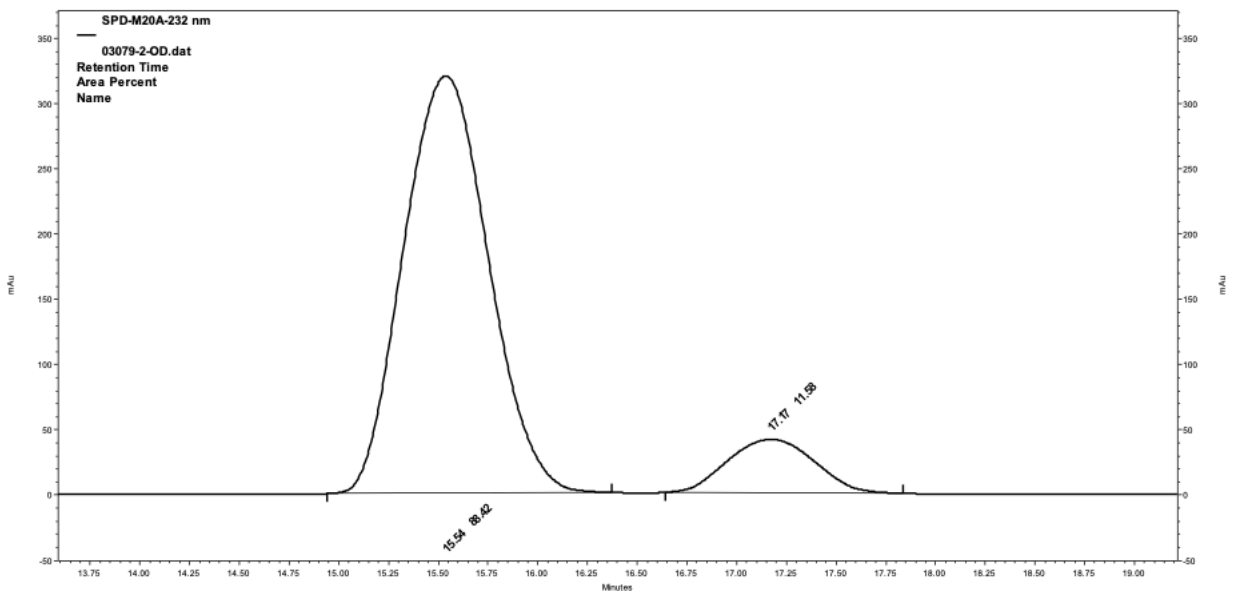

**2,2,2-Trifluoroethyl (1R,2R,3R,4S)-3-((E)-3-oxoprop-1-en-1-yl)bicyclo[2.2.1]hept-5-ene-2-carboxylate**

**(3i):**

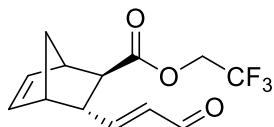

Colorless oil, 5.5 mg, 67% yield.  $^1\text{H}$  NMR (700 MHz,  $\text{CDCl}_3$ )  $\delta$  9.44 (d,  $J = 7.8$  Hz, 1H), 6.46 (dd,  $J = 15.6$ , 8.3 Hz, 1H), 6.34 (dd,  $J = 5.6$ , 3.1 Hz, 1H), 6.17 (dd,  $J = 5.6$ , 2.8 Hz, 1H), 6.12 (dd,  $J = 15.6$ , 7.8 Hz, 1H), 4.50 (qd,  $J = 8.4$ , 2.7 Hz, 2H), 3.31 – 3.26 (m, 1H), 3.18 (s, 1H), 3.05 (s, 1H), 2.23 – 2.18 (m, 1H), 1.70 (d,  $J = 9.0$  Hz, 1H), 1.58 (dd,  $J = 9.0$ , 1.5 Hz, 1H).  $^{13}\text{C}$  NMR (176 MHz,  $\text{CDCl}_3$ )  $\delta$  193.56, 172.81, 159.28, 137.56, 135.30, 133.14, 122.88 (q,  $J = 277.4$  Hz), 60.50 (q,  $J = 36.5$  Hz), 49.75, 47.71, 47.68, 47.43, 47.41. HRMS (m/z): calculated for  $\text{C}_{13}\text{H}_{13}\text{F}_3\text{NaO}_3[\text{M} + \text{Na}]^+$ , 297.0709; observed, 297.0715. HPLC (Chiralpak OD-H column, 95:5 hexanes/isopropanol, 1 ml/min),  $t_r = 9.47$  min (major), 10.94 min (minor); ee = 90%.

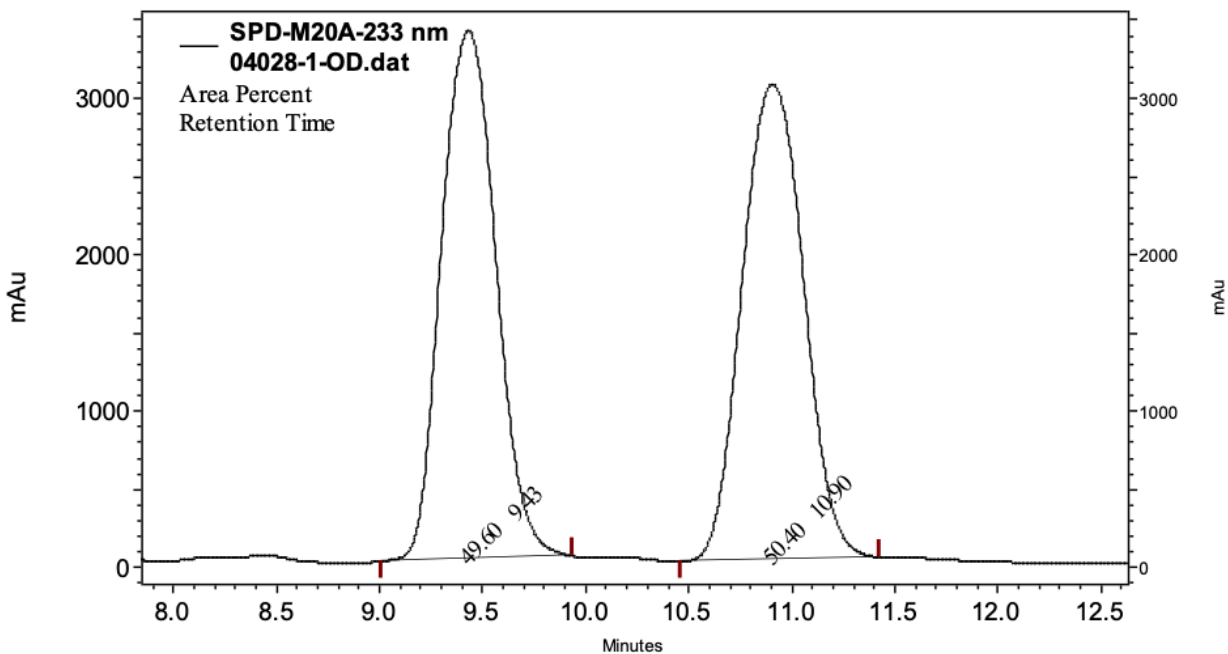



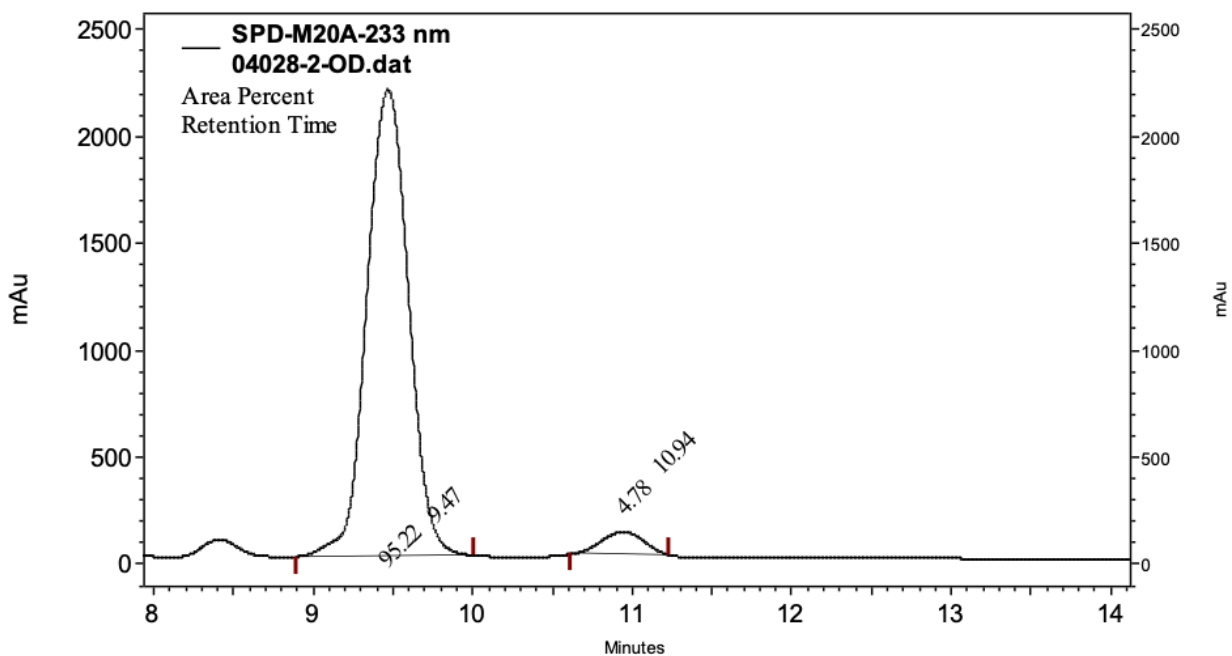

**Cyclohexyl (1R,2R,3R,4S)-3-((E)-3-oxoprop-1-en-1-yl)bicyclo[2.2.1]hept-5-ene-2-carboxylate (3j):**

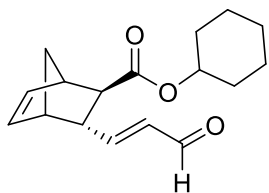

An inseparable mixture with side-product. The product yield was determined by  $^1\text{H}$  NMR. HPLC (Chiralpak OD-H column, 95:5 hexanes/isopropanol, 1 ml/min),  $t_r$  = 6.72 min (major), 7.24 min (minor); ee = 88%.

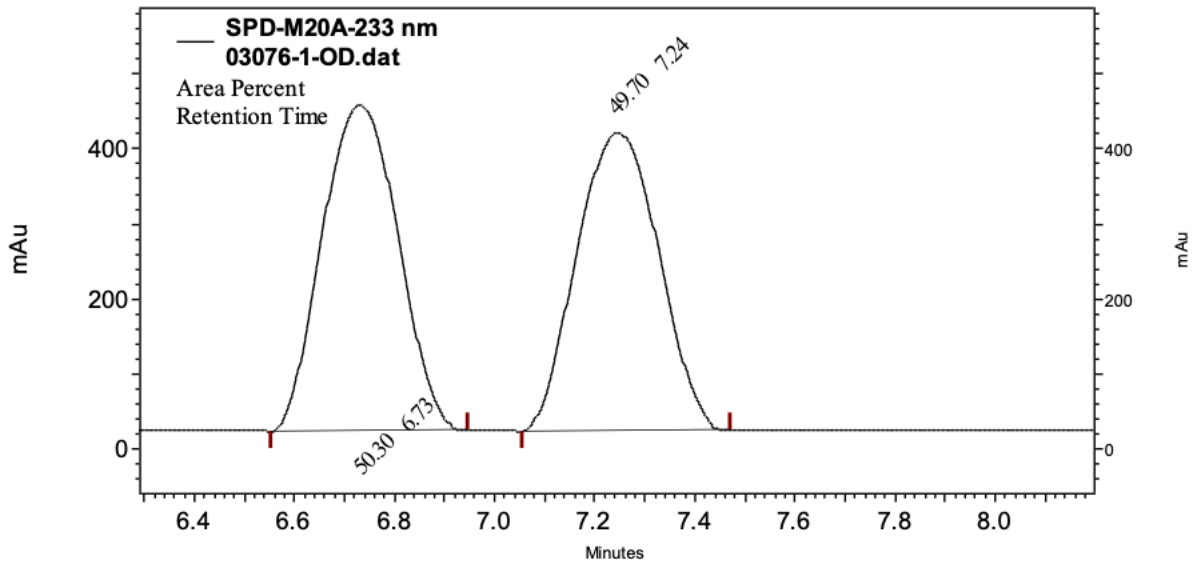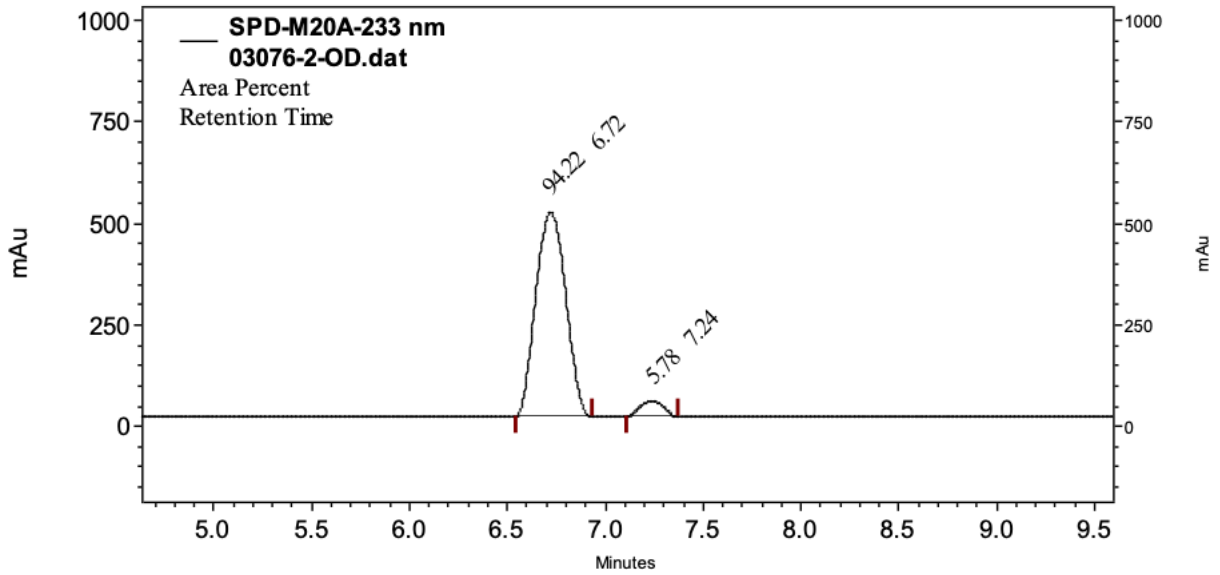

**((3*R*,5*R*,7*R*)-adamantan-1-yl)methyl (1*R*,2*R*,3*R*,4*S*)-3-((*E*)-3-oxoprop-1-en-1-yl)bicyclo[2.2.1]hept-5-ene-2-carboxylate (**3k**):**

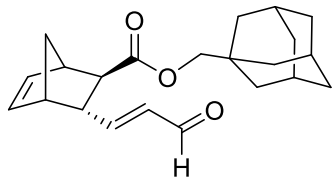

An inseparable mixture with side-product. The product yield was determined by  $^1\text{H}$  NMR. HPLC (Chiralpak OD-H column, 95:5 hexanes/isopropanol, 1 ml/min),  $t_r$  = 6.75 min (major), 7.39 min (minor); ee = 79%.

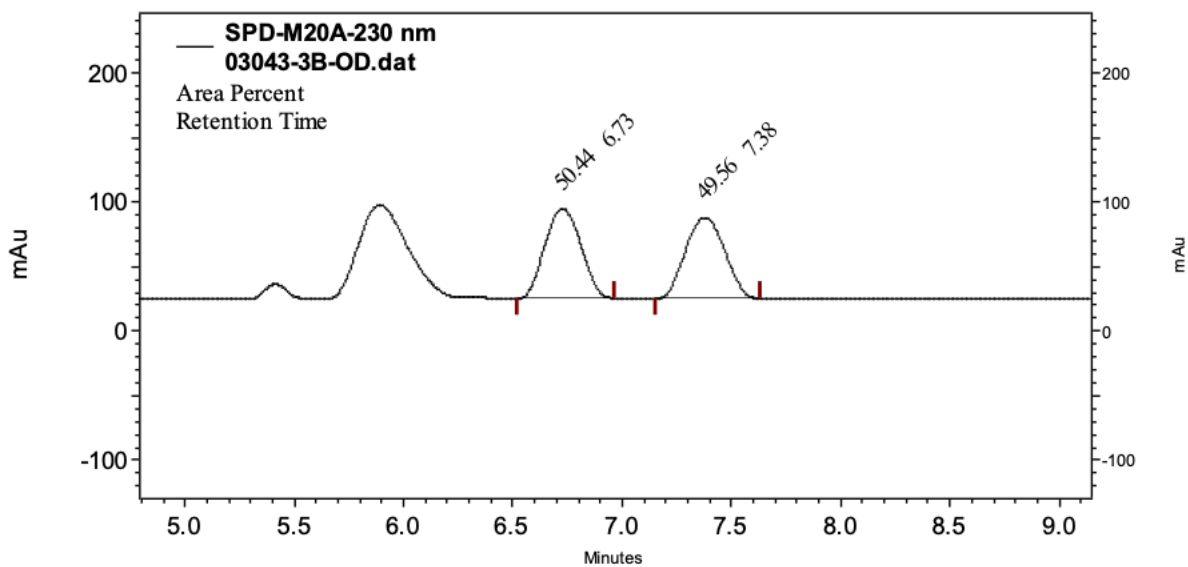

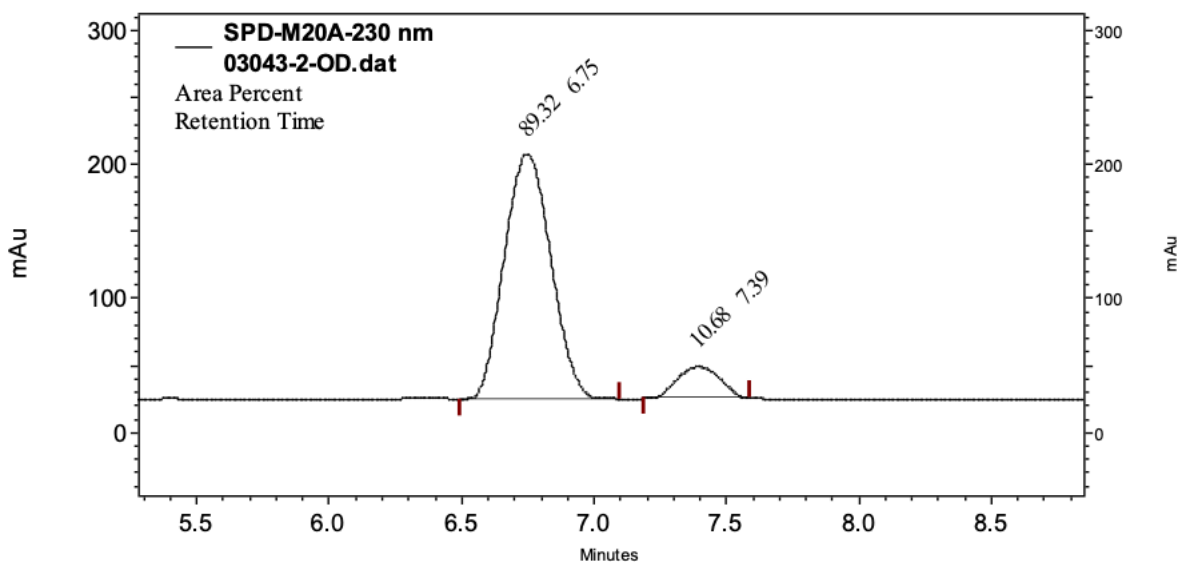

(3*R*,5*R*,7*R*)-adamantan-1-yl (1*R*,2*R*,3*R*,4*S*)-3-((*E*)-3-oxoprop-1-en-1-yl)bicyclo[2.2.1]hept-5-ene-2-carboxylate (**3l**):

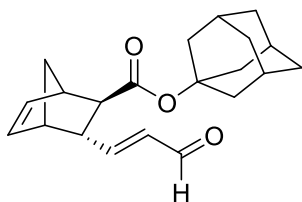

Colorless solid, 3.3 mg, 34% yield.  $^1\text{H}$  NMR (700 MHz,  $\text{CDCl}_3$ )  $\delta$  9.44 (d,  $J = 7.9$  Hz, 1H), 6.47 (dd,  $J = 15.5$ , 9.3 Hz, 1H), 6.32 (dd,  $J = 5.4$ , 3.0 Hz, 1H), 6.07 (dd,  $J = 15.5$ , 7.9 Hz, 1H), 6.04 – 6.00 (m, 1H), 2.86 (s, 1H), 2.63 (s, 1H), 2.45 – 2.40 (m, 1H), 1.54 – 1.36 (m, 4H), 1.25 (s, 3H), 0.89 – 0.85 (m, 8H).  $^{13}\text{C}$  NMR (176 MHz,  $\text{CDCl}_3$ )  $\delta$  194.18, 163.55, 138.84, 133.28, 131.90, 53.18, 50.07, 49.79, 48.19, 46.90, 42.81, 31.16, 30.04. HRMS ( $m/z$ ): calculated for  $\text{C}_{21}\text{H}_{26}\text{NaO}_3[\text{M} + \text{Na}]^+$ , 349.1774; observed, 349.1788. HPLC (Chiralpak OD-H column, 98:2 hexanes/isopropanol, 1 ml/min),  $t_r = 9.93$  min (major), 10.89 min (minor); ee = 94%.

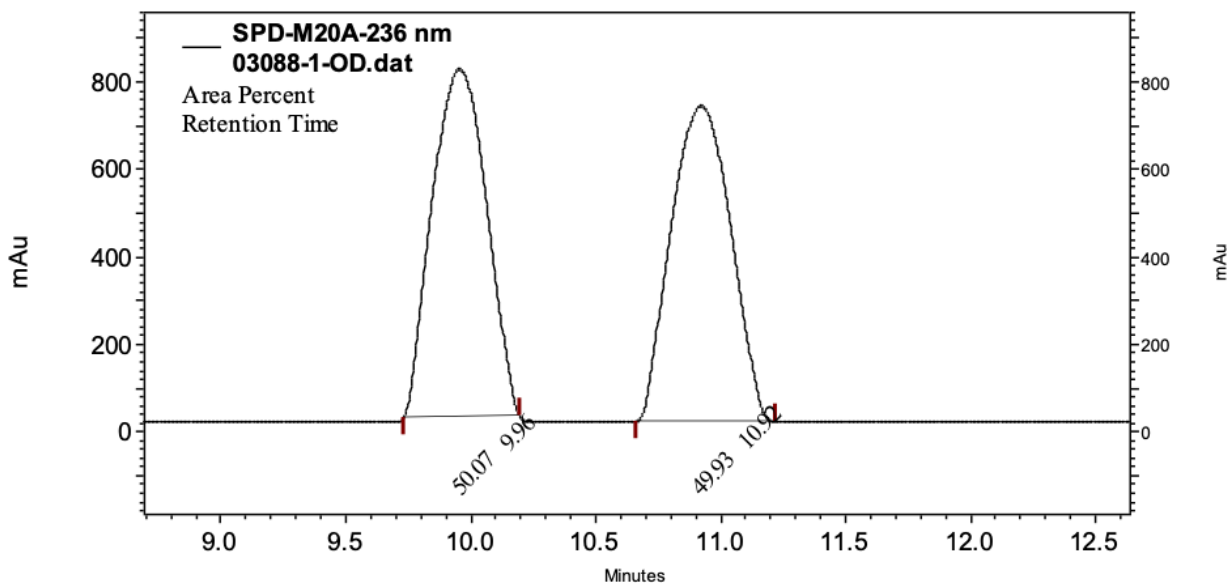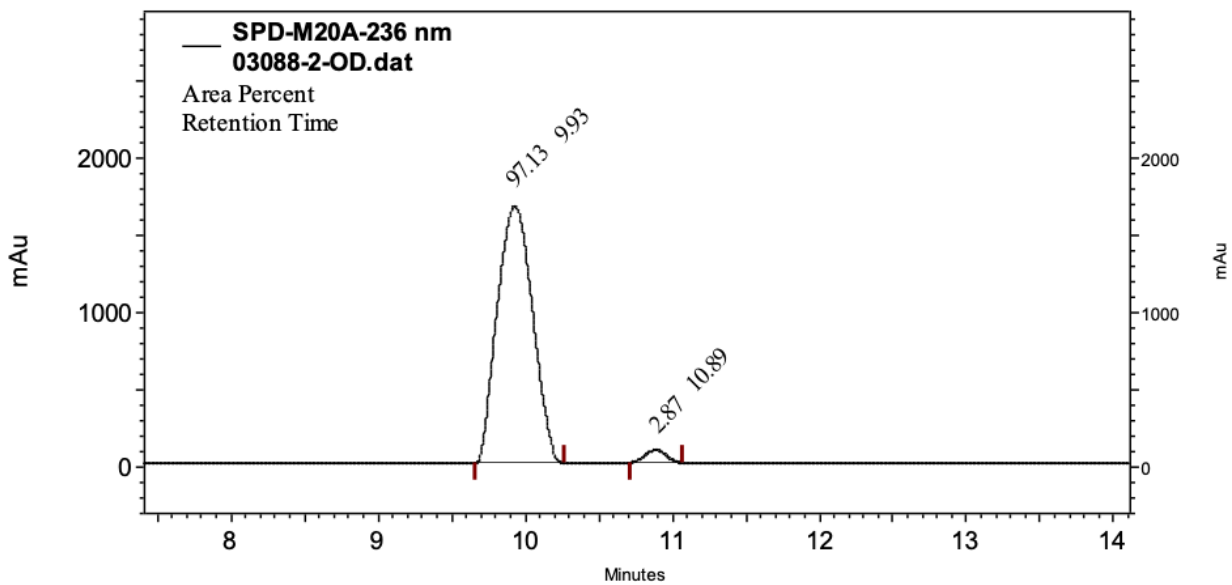

(1*R*,2*S*,5*S*)-adamantan-2-yl (1*R*,2*R*,3*R*,4*S*)-3-((*E*)-3-oxoprop-1-en-1-yl)bicyclo[2.2.1]hept-5-ene-2-carboxylate (3m):

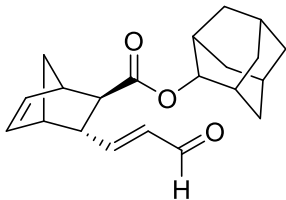

Colorless solid, 3.5 mg, 36% yield. <sup>1</sup>H NMR (499 MHz, CDCl<sub>3</sub>) δ 9.46 (d, *J* = 7.8 Hz, 1H), 6.52 (dd, *J* = 15.6, 8.3 Hz, 1H), 6.35 (s, 1H), 6.15 (t, *J* = 11.3 Hz, 2H), 4.95 (s, 1H), 3.29 (s, 1H), 3.18 (s, 1H), 3.03 (s, 1H), 2.16 (s, 1H), 1.97 (d, *J* = 22.4 Hz, 4H), 1.84 (s, 4H), 1.76 (d, *J* = 23.9 Hz, 6H). <sup>13</sup>C NMR (176 MHz, CDCl<sub>3</sub>) δ 193.83, 173.61, 160.71, 137.94, 134.94, 132.88, 77.60, 50.69, 47.93, 47.64, 47.57, 47.31, 37.33, 36.30, 31.88, 27.17, 26.95. HRMS (*m/z*): calculated for C<sub>21</sub>H<sub>26</sub>NaO<sub>3</sub>[*M* + Na]<sup>+</sup>, 349.1774; observed, 349.1784. HPLC (Chiralpak OD-H column, 95:5 hexanes/isopropanol, 1 ml/min), *tr* = 6.63 min (major), 7.12 min (minor); *ee* = 97%.

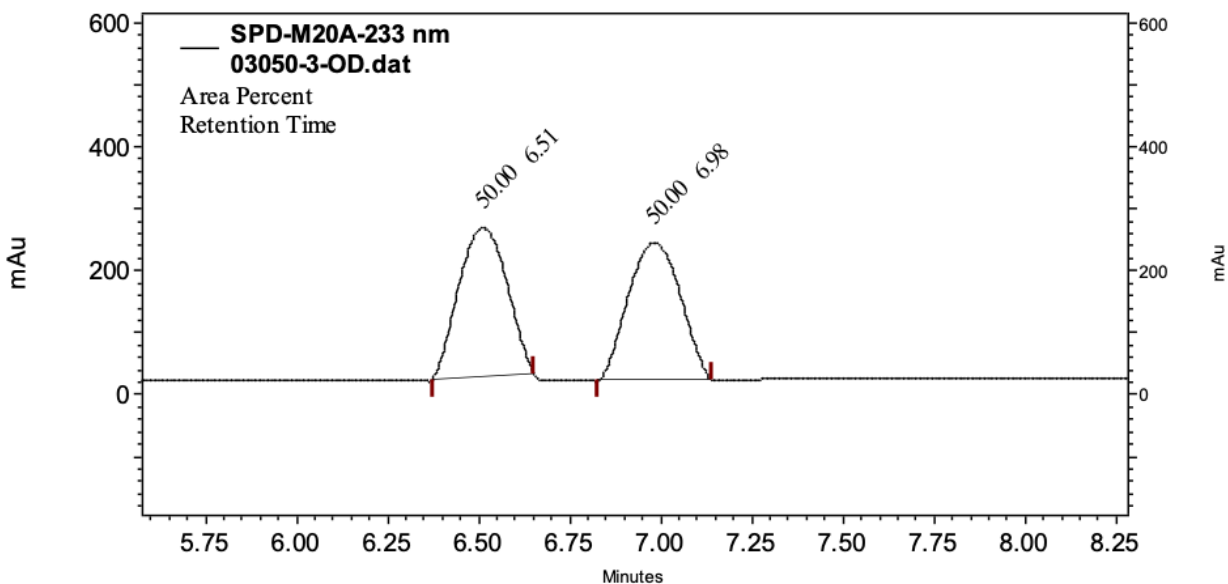

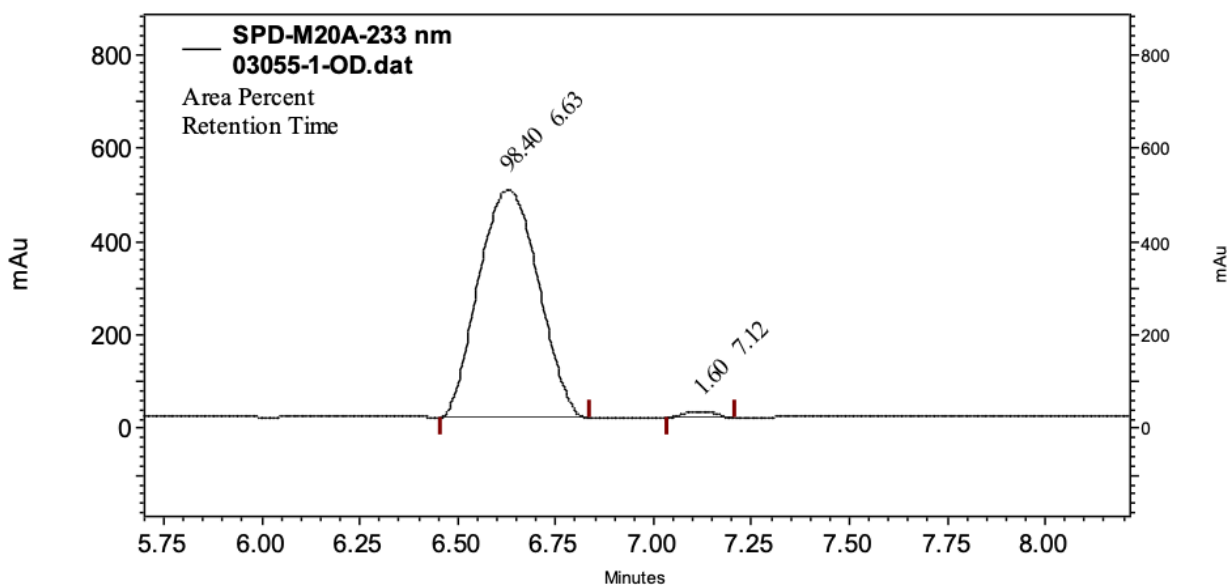

**Furan-2-ylmethyl (1R,2R,3R,4S)-3-((E)-3-oxoprop-1-en-1-yl)bicyclo[2.2.1]hept-5-ene-2-carboxylate**

**(3n):**

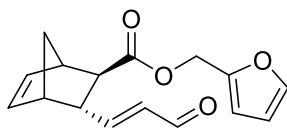

Colorless oil, 5.9 mg, 73% yield.  $^1\text{H}$  NMR (500 MHz,  $\text{CDCl}_3$ )  $\delta$  9.43 (d,  $J = 7.8$  Hz, 1H), 7.42 (s, 1H), 6.46 (dd,  $J = 15.6, 8.3$  Hz, 1H), 6.42 – 6.34 (m, 2H), 6.31 (dd,  $J = 5.3, 3.2$  Hz, 1H), 6.12 (ddd,  $J = 23.4, 10.5, 5.2$  Hz, 2H), 5.09 (s, 2H), 3.28 (dt,  $J = 7.5, 3.7$  Hz, 1H), 3.14 (s, 1H), 3.02 (s, 1H), 2.14 (d,  $J = 4.7$  Hz, 1H), 1.74 (d,  $J = 8.8$  Hz, 1H), 1.54 (d,  $J = 8.9$  Hz, 1H).  $^{13}\text{C}$  NMR (126 MHz,  $\text{CDCl}_3$ )  $\delta$  193.83, 173.99, 160.25, 149.27, 143.40, 137.80, 135.13, 133.00, 110.73, 110.62, 58.51, 50.06, 47.70, 47.65, 47.51, 47.36. HRMS ( $m/z$ ): calculated for  $\text{C}_{16}\text{H}_{16}\text{NaO}_4[\text{M} + \text{Na}]^+$ , 295.0941; observed, 295.0955. HPLC (Chiralpak OD-H column, 95:5 hexanes/isopropanol, 1 ml/min),  $t_r = 13.40$  min (major), 14.58 min (minor); ee = 92%.

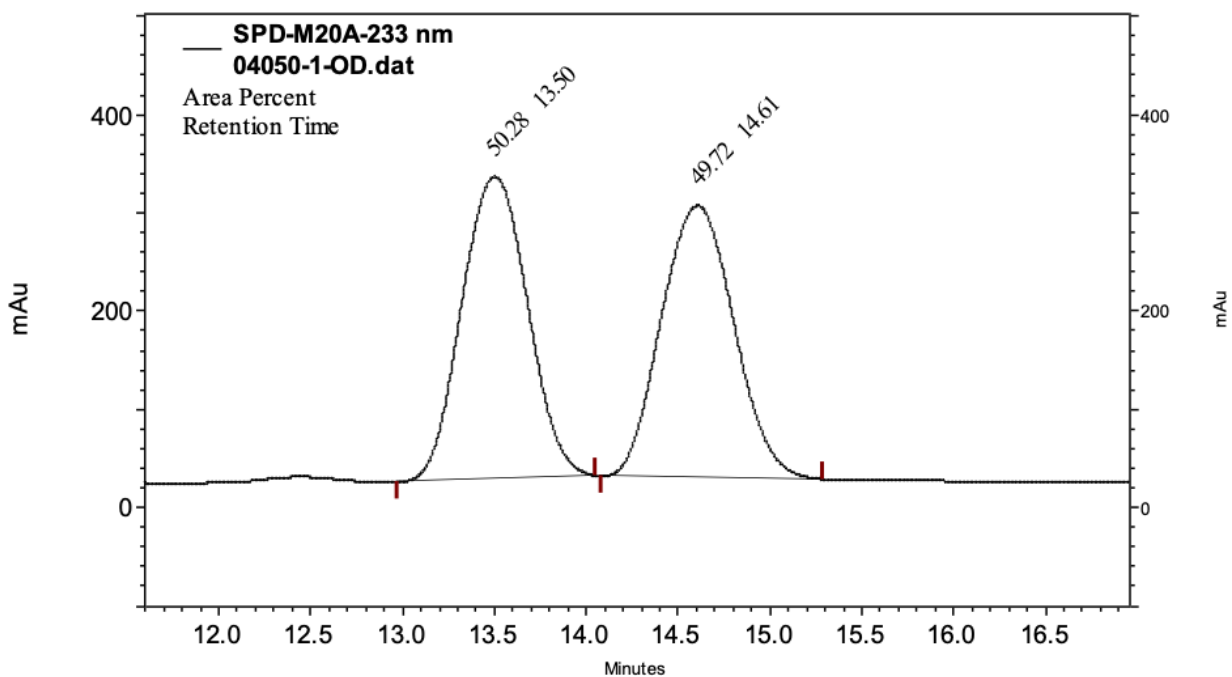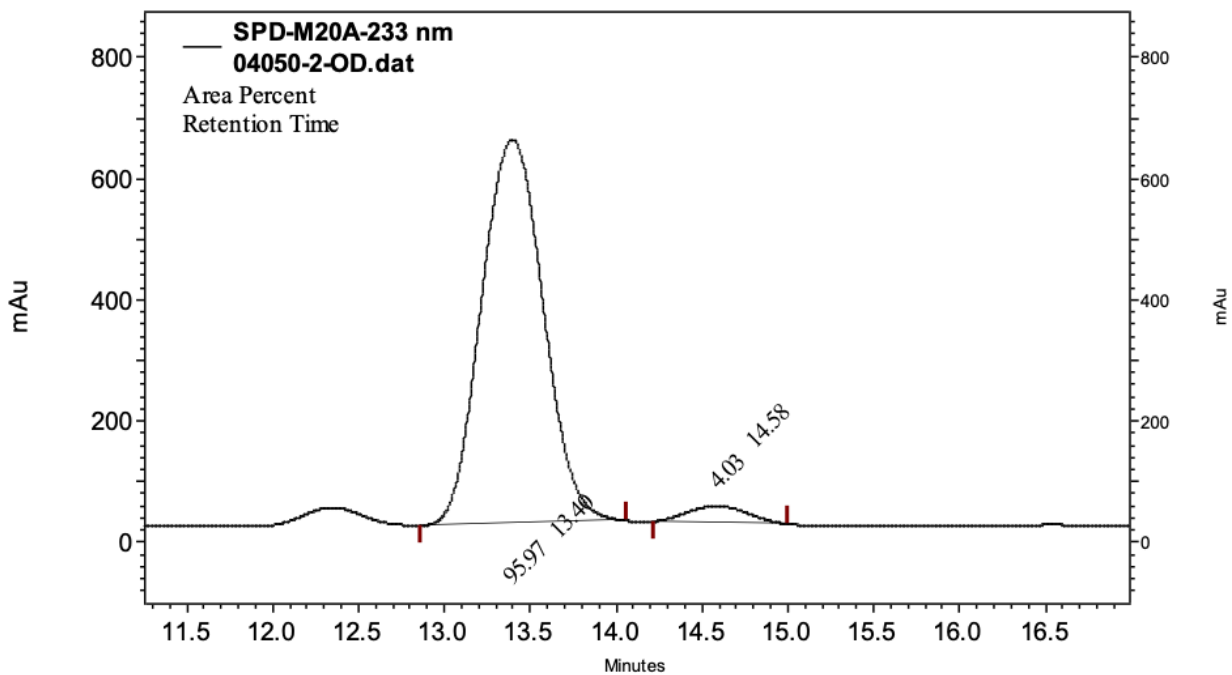



**2-Methylallyl (1*R*,2*R*,3*R*,4*S*)-3-((*E*)-3-oxoprop-1-en-1-yl)bicyclo[2.2.1]hept-5-ene-2-carboxylate (3o):**

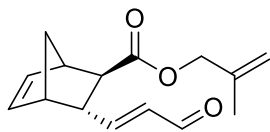

An inseparable mixture with side-product. The product yield was determined by <sup>1</sup>H NMR. HPLC (Chiralpak OD-H column, 98:2 hexanes/isopropanol, 1 ml/min), *t<sub>r</sub>* = 13.48 min (major), 14.27 min (minor); ee = 95%.

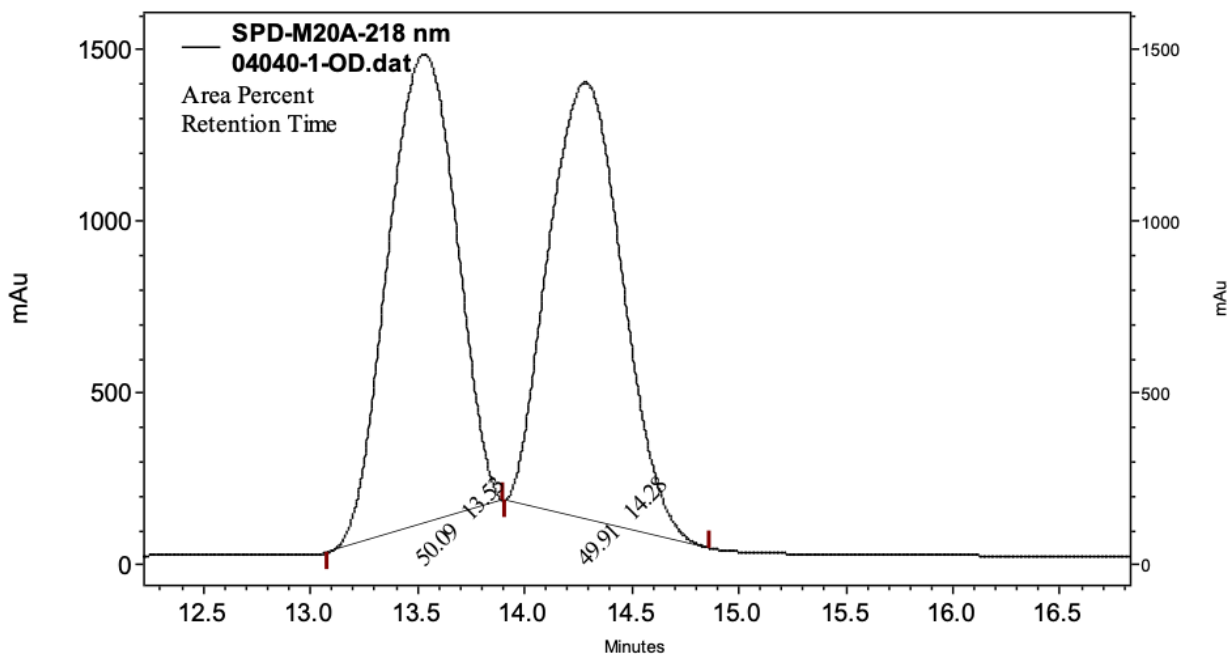

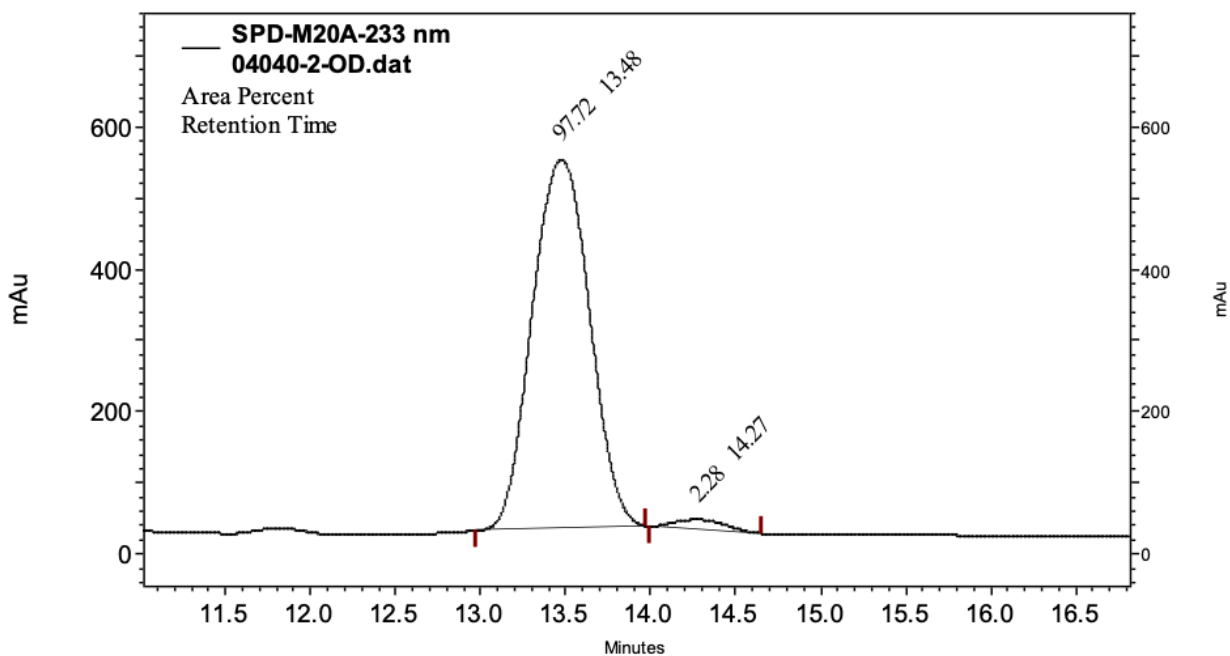

**4-Methylpenta-2,3-dien-1-yl (1R,2R,3R,4S)-3-((E)-3-oxoprop-1-en-1-yl)bicyclo[2.2.1]hept-5-ene-2-carboxylate (3p):**

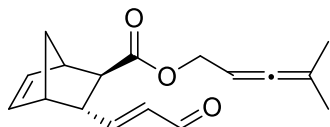

An inseparable mixture with side-product. The product yield was determined by  $^1\text{H}$  NMR. HPLC (Chiralpak OD-H column, 95:5 hexanes/isopropanol, 1 ml/min),  $t_r$  = 7.34 min (major), 8.23 min (minor); ee = 81%.

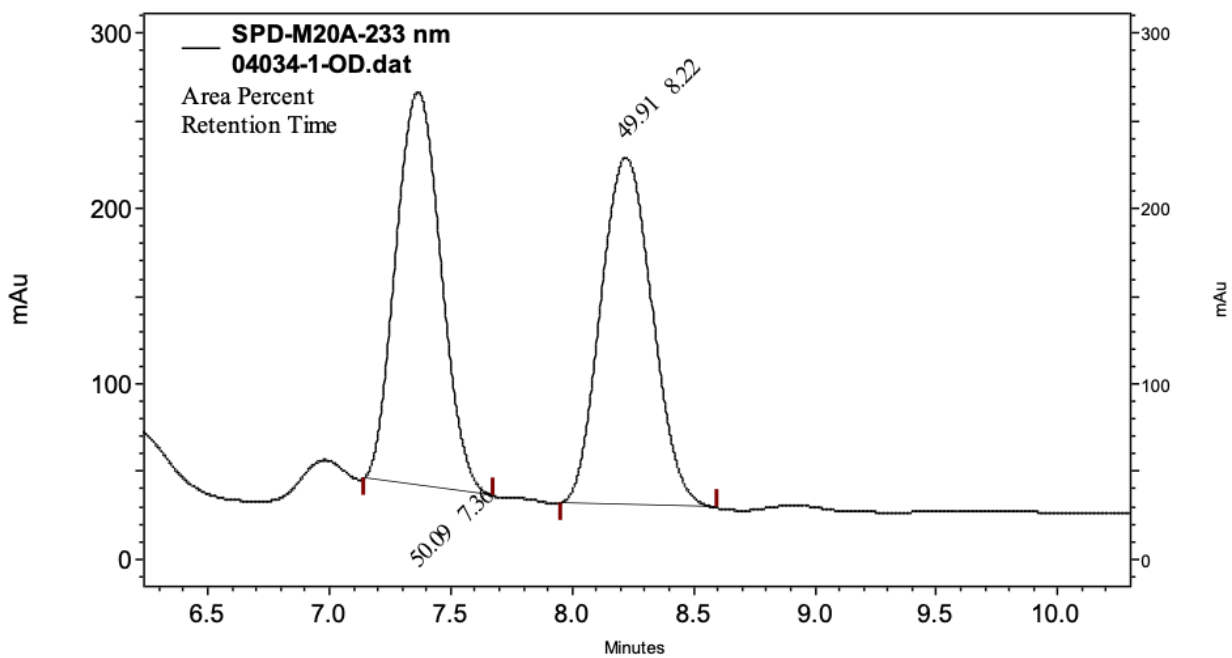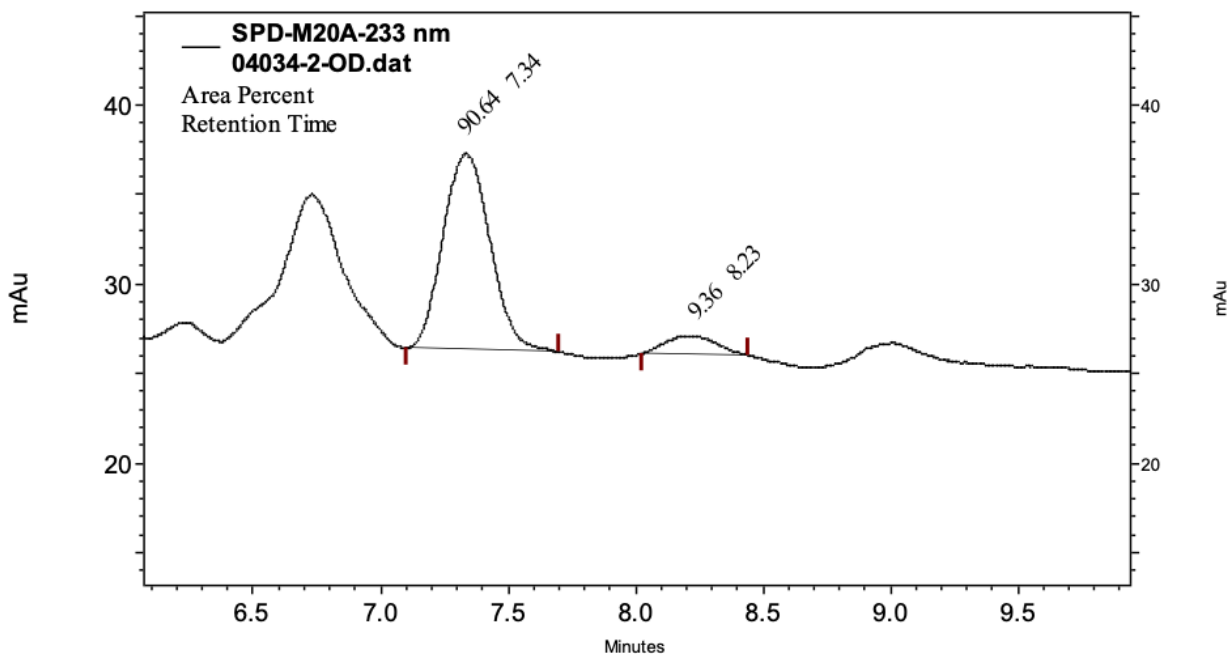

**Ethyl (1R,2R,3S,4S)-3-((E)-2-methyl-3-oxoprop-1-en-1-yl)bicyclo[2.2.1]hept-5-ene-2-carboxylate (3q):**

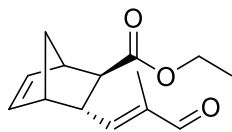

Colorless oil, 3.9 mg, 55% yield.  $^1\text{H}$  NMR (700 MHz,  $\text{CDCl}_3$ )  $\delta$  9.33 (s, 1H), 6.40 – 6.35 (m, 1H), 6.21 (s, 2H), 6.02 (d,  $J = 10.0$  Hz, 1H), 4.16 (q,  $J = 7.3$  Hz, 2H), 3.51 (d,  $J = 9.9$  Hz, 1H), 3.15 (s, 1H), 3.08 (s, 1H), 2.98 (s, 1H), 2.60 (s, 1H), 2.04 (d,  $J = 4.0$  Hz, 1H), 1.81 (s, 3H), 1.77 (d,  $J = 8.7$  Hz, 2H), 1.27 (t,  $J = 7.3$  Hz, 3H).  $^{13}\text{C}$  NMR (176 MHz,  $\text{CDCl}_3$ )  $\delta$  174.53, 157.22, 139.51, 138.03, 135.28, 133.21, 60.87, 47.80, 47.69, 47.36, 45.61, 43.61, 14.27, 14.18. HRMS ( $m/z$ ): calculated for  $\text{C}_{14}\text{H}_{18}\text{NaO}_3[\text{M} + \text{Na}]^+$ , 257.1148; observed, 257.1156. HPLC (Chiralpak OD-H column, 95:5 hexanes/isopropanol, 1 ml/min),  $t_r = 33.38$  min (major), 48.32 min (minor); ee = 60%.

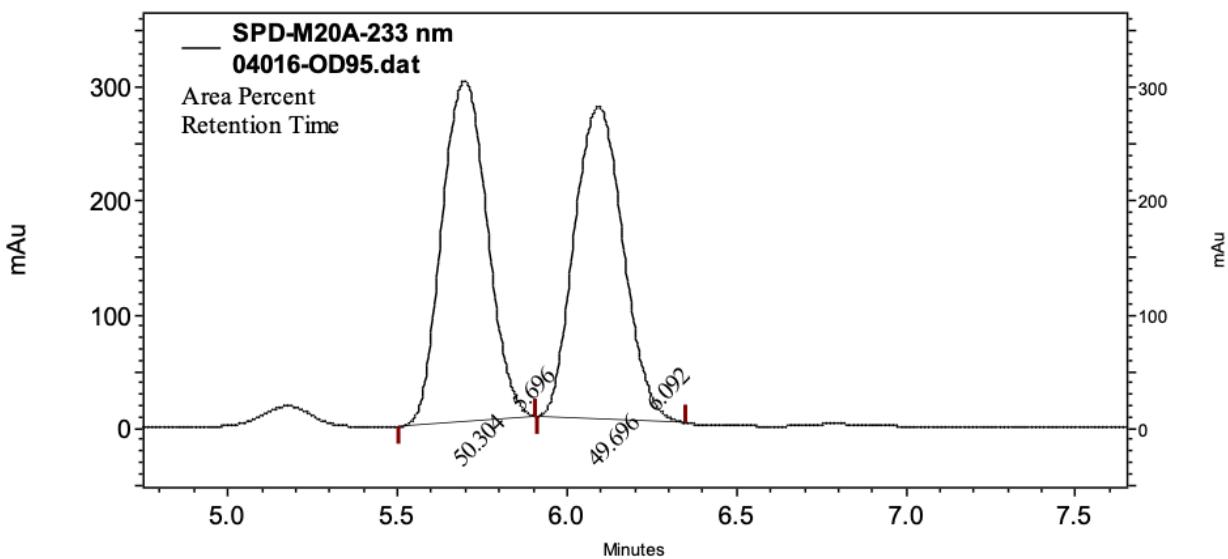

With 4y as catalyst:

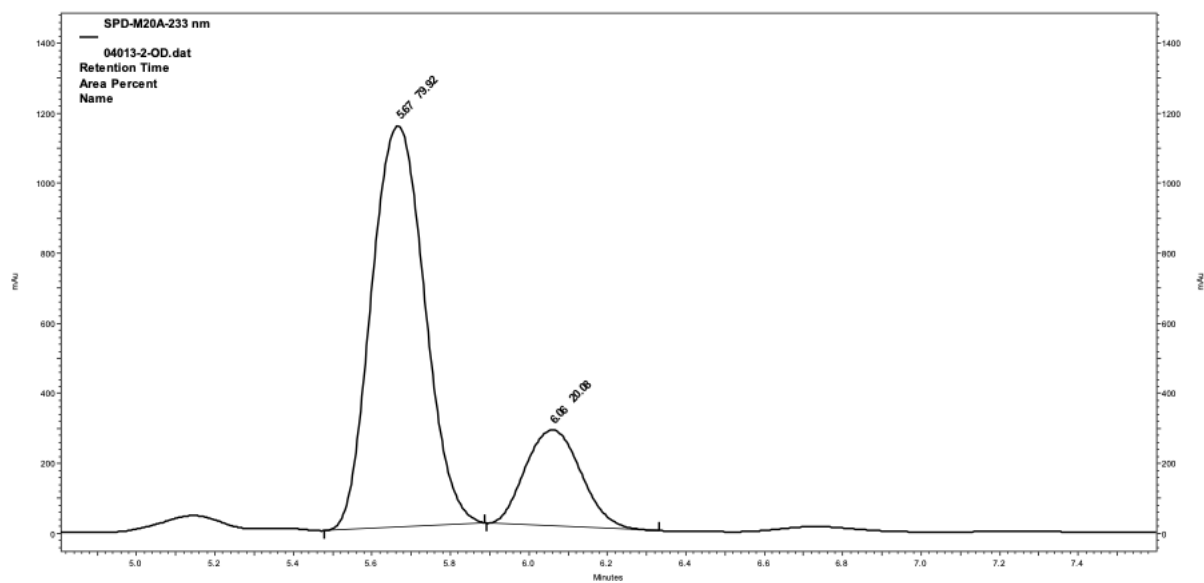

With 4z as catalyst:

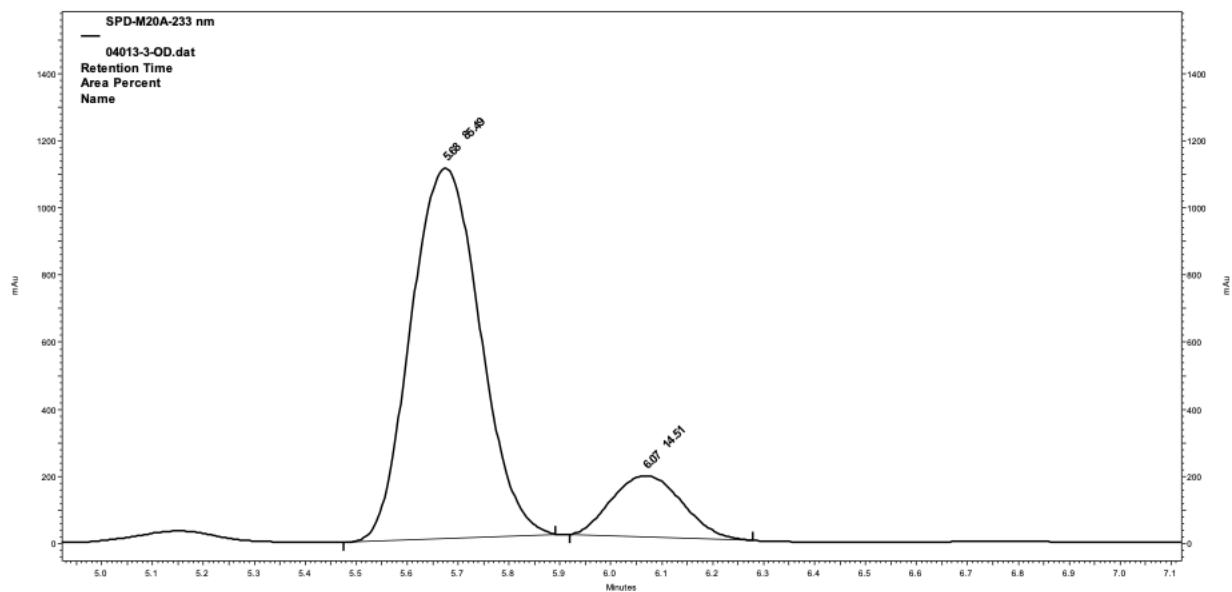

**Ethyl (1R,2R,3R,4S)-3-((E)-3-oxobut-1-en-1-yl)bicyclo[2.2.1]hept-5-ene-2-carboxylate (3r):**

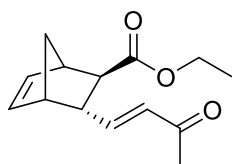

Colorless oil, 1.1 mg, 15% yield.  $^1\text{H}$  NMR (700 MHz,  $\text{CDCl}_3$ )  $\delta$  6.42 (dd,  $J = 15.9, 8.5$  Hz, 1H), 6.30 (dd,  $J = 5.5, 3.2$  Hz, 1H), 6.14 (dd,  $J = 5.6, 2.8$  Hz, 2H), 6.11 (d,  $J = 15.9$  Hz, 1H), 4.15 (q,  $J = 7.1$  Hz, 2H), 3.15 (dt,  $J = 8.3, 4.1$  Hz, 1H), 3.10 (s, 1H), 2.97 (s, 1H), 2.20 (s, 3H), 2.12 (s, 0H), 2.06 (dd,  $J = 4.7, 1.1$  Hz, 1H), 1.71 (d,  $J = 8.8$  Hz, 1H), 1.51 (dd,  $J = 8.8, 1.5$  Hz, 1H), 1.26 (t,  $J = 7.1$  Hz, 3H).  $^{13}\text{C}$  NMR (126 MHz,  $\text{CDCl}_3$ )  $\delta$  198.49, 174.59, 150.30, 137.64, 135.22, 131.20, 77.30, 77.05, 76.79, 60.84, 50.13, 47.70, 47.64, 47.50, 47.10, 27.21, 14.28. HRMS ( $m/z$ ): calculated for  $\text{C}_{14}\text{H}_{18}\text{NaO}_3[\text{M} + \text{Na}]^+$ , 257.1148; observed, 257.1159. HPLC (Chiralpak OD-H column, 95:5 hexanes/isopropanol, 1 ml/min),  $t_r = 20.27$  min (minor), 22.46 min (major); ee = 95%.

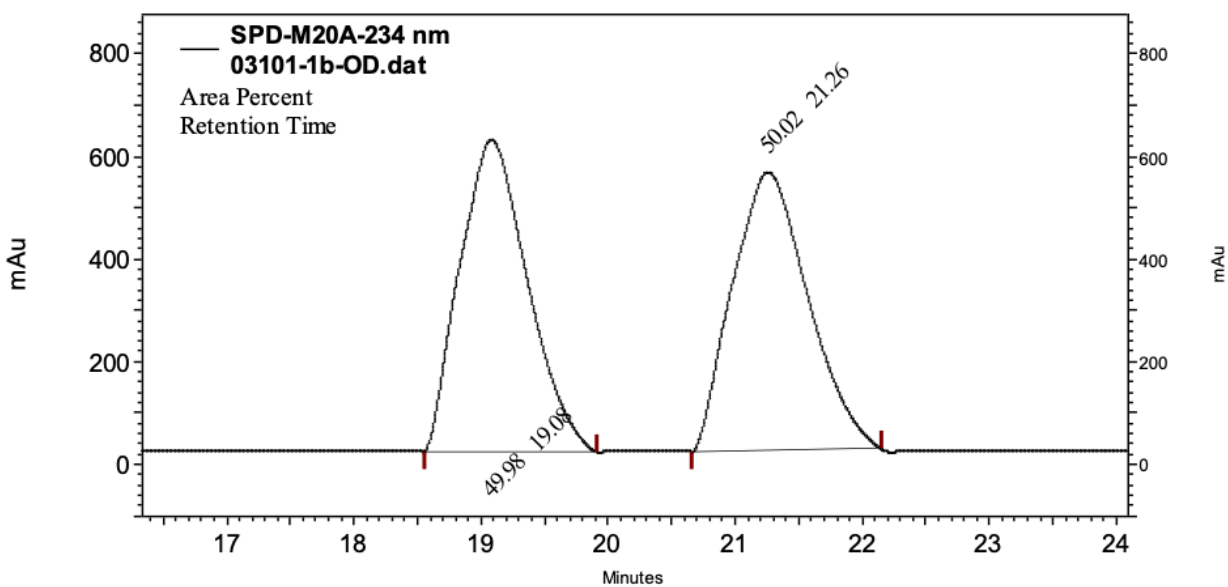

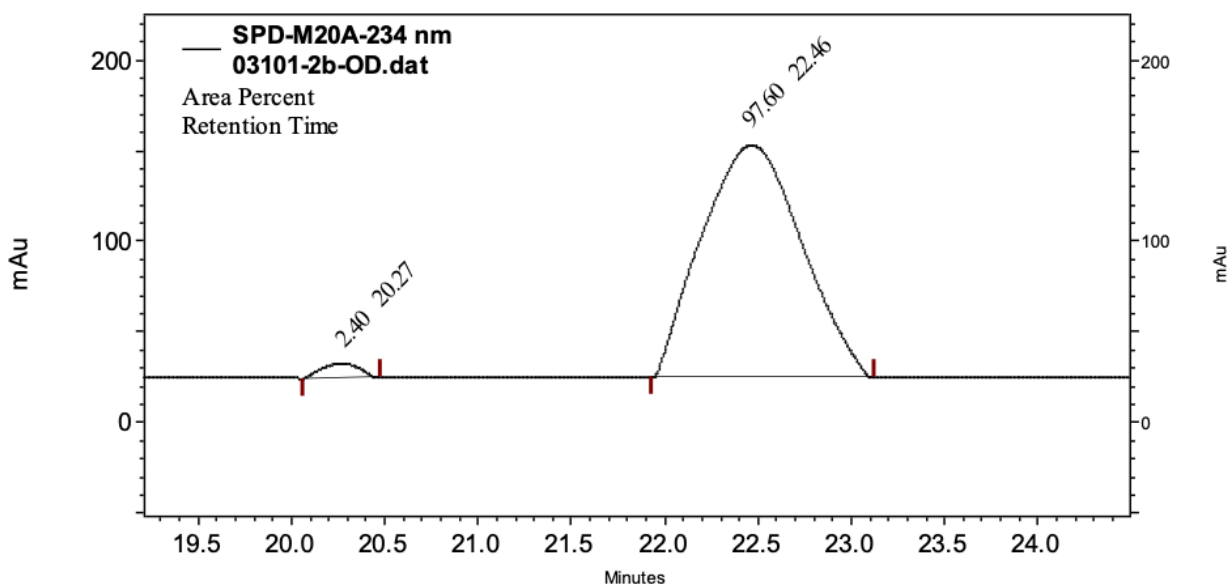

**Benzo[d][1,3]dioxol-5-yl (1R,2R,3R,4S)-3-((E)-3-oxoprop-1-en-1-yl)bicyclo[2.2.1]hept-5-ene-2-carboxylate (3s):**

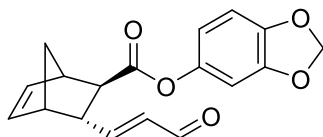

Colorless solid, 4.2 mg, 45% yield.  $^1\text{H}$  NMR (700 MHz,  $\text{CDCl}_3$ )  $\delta$  9.48 (d,  $J = 7.8$  Hz, 1H), 6.59 (s, 1H), 6.56 – 6.51 (m, 2H), 6.41 – 6.38 (m, 1H), 6.22 – 6.17 (m, 2H), 5.98 (s, 2H), 3.40 (dt,  $J = 8.0, 4.0$  Hz, 1H), 3.30 (s, 1H), 3.09 (s, 1H), 2.35 (d,  $J = 4.7$  Hz, 1H), 1.80 (d,  $J = 8.9$  Hz, 1H), 1.62 (d,  $J = 9.0$  Hz, 1H).  $^{13}\text{C}$  NMR (176 MHz,  $\text{CDCl}_3$ )  $\delta$  193.67, 173.26, 159.77, 145.47, 144.96, 137.70, 135.34, 133.15, 113.75, 108.01, 103.57, 101.78, 50.23, 47.79, 47.77, 47.65, 47.51. HRMS ( $m/z$ ): calculated for  $\text{C}_{18}\text{H}_{16}\text{NaO}_5[\text{M} + \text{Na}]^+$ , 335.0890; observed, 335.0905. HPLC (Chiralpak OD-H column, 95:5 hexanes/isopropanol, 1 ml/min),  $t_r = 33.38$  min (major), 48.32 min (minor); ee = 64%.

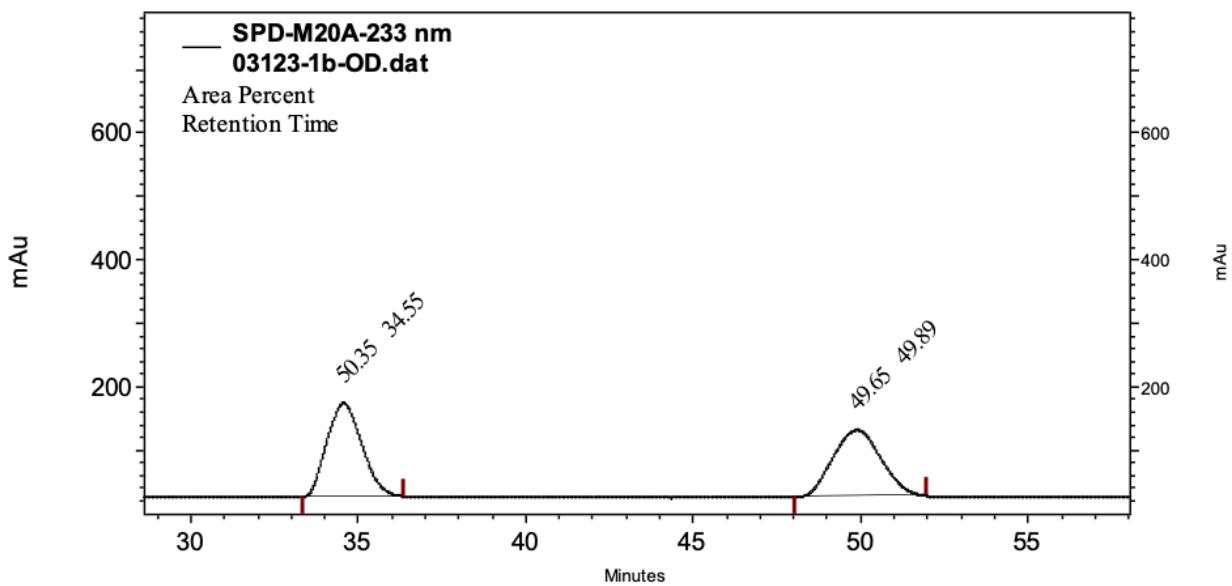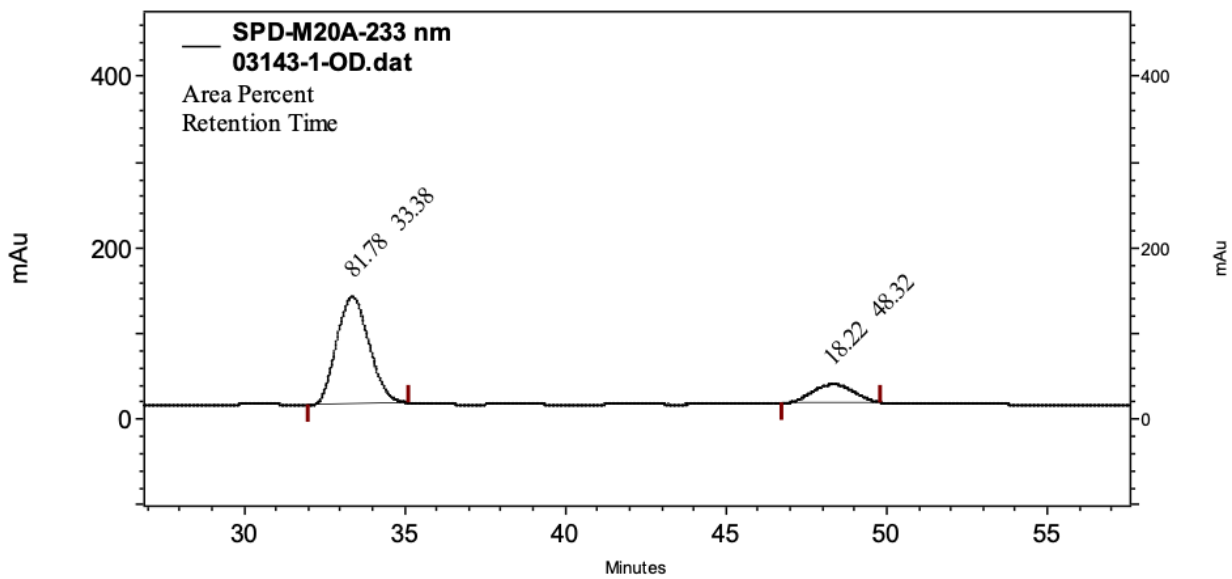



**(1*R*,2*R*,3*R*,4*S*)-3-((*E*)-3-oxoprop-1-en-1-yl)bicyclo[2.2.1]hept-5-en-2-yl acetate (3t):**

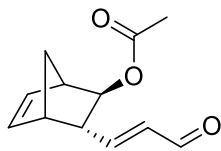

Colorless oil, 3.1 mg, 50% yield.  $^1\text{H}$  NMR (700 MHz,  $\text{CDCl}_3$ )  $\delta$  9.46 (d,  $J = 7.8$  Hz, 1H), 6.64 (dd,  $J = 15.7$ , 7.8 Hz, 1H), 6.25 (s, 1H), 6.18 (d,  $J = 3.7$  Hz, 1H), 6.13 (dd,  $J = 15.7$ , 7.8 Hz, 1H), 4.49 (s, 1H), 2.96 (d,  $J = 14.4$  Hz, 2H), 2.75 (s, 1H), 2.07 (s, 3H), 1.86 (d,  $J = 8.6$  Hz, 1H), 1.75 (d,  $J = 8.6$  Hz, 1H).  $^{13}\text{C}$  NMR (176 MHz,  $\text{CDCl}_3$ )  $\delta$  193.83, 159.46, 138.07, 134.27, 133.58, 133.12, 79.69, 51.19, 48.20, 47.24, 46.38, 21.25. HRMS ( $m/z$ ): calculated for  $\text{C}_{12}\text{H}_{14}\text{NaO}_3$  [ $\text{M} + \text{Na}$ ] $^+$ , 229.0835; observed, 229.0842. HPLC (Chiralpak IA-H column, 99:1 hexanes/isopropanol, 1 ml/min),  $t_r = 21.88$  min (major), 23.80 min (minor); ee = 97%.

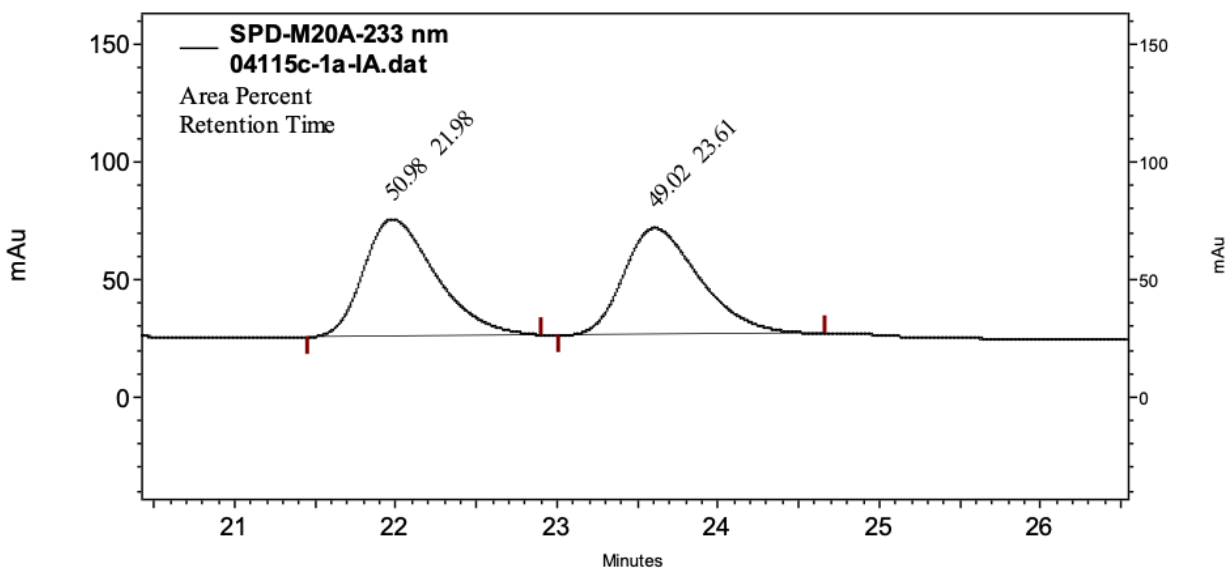

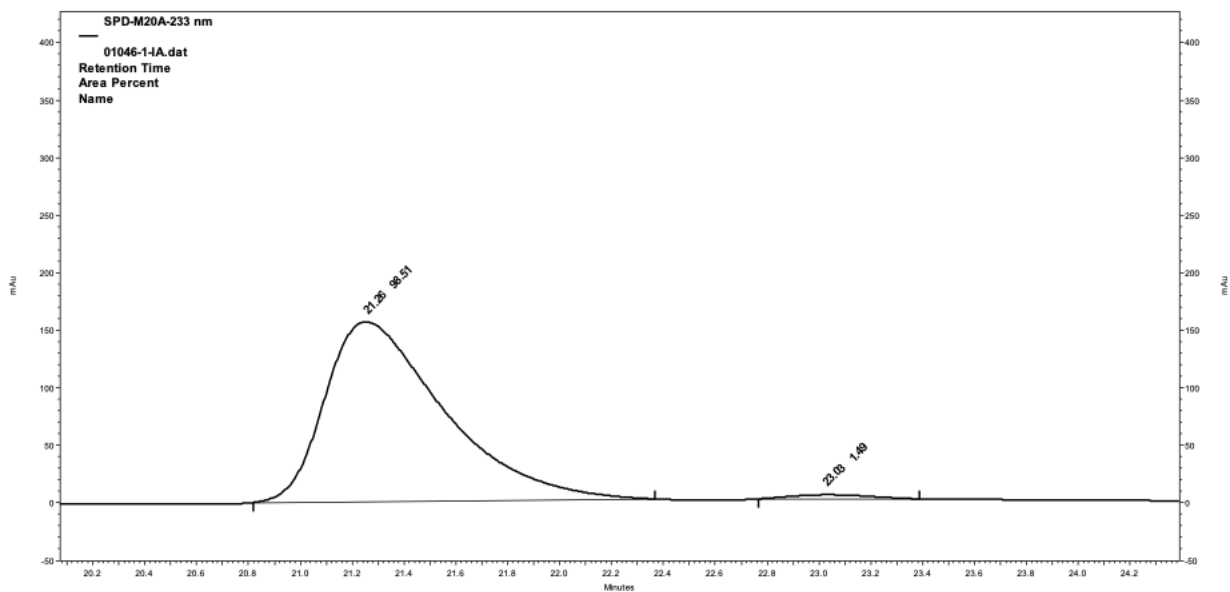

**(E)-3-((1S,2R,3R,4R)-3-neopentylbicyclo[2.2.1]hept-5-en-2-yl)acrylaldehyde (3v):**

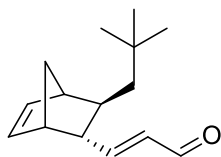

An inseparable mixture with side-product. The product yield was determined by  $^1\text{H}$  NMR. HPLC (Chiralpak OD-H column, 95:5 hexanes/isopropanol, 1 ml/min),  $t_r$  = 33.38 min (major), 48.32 min (minor); ee = 69%.

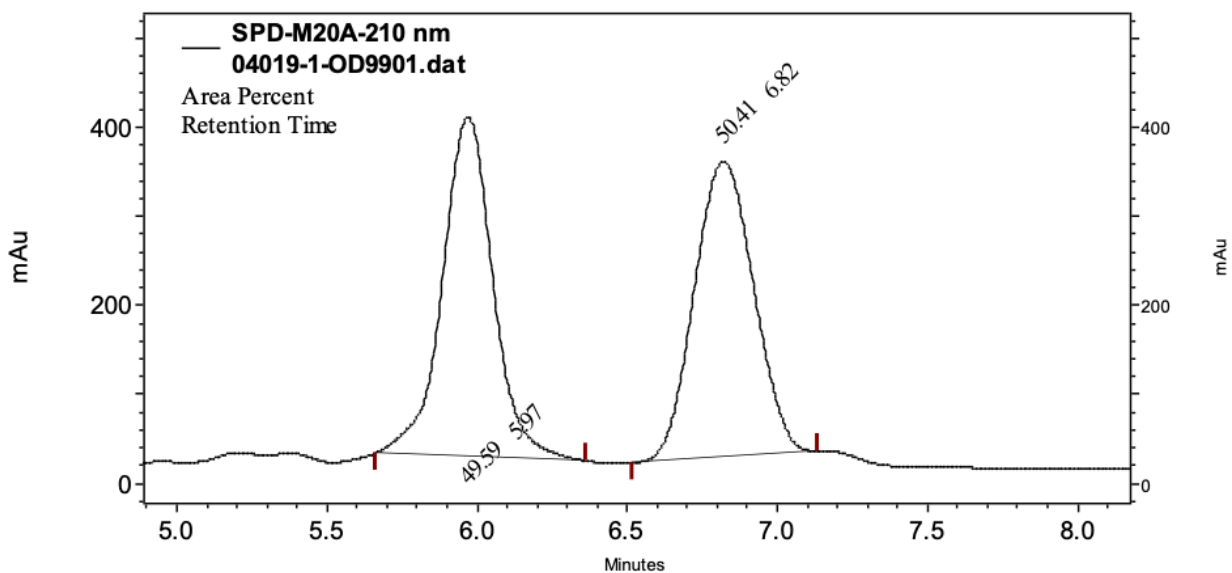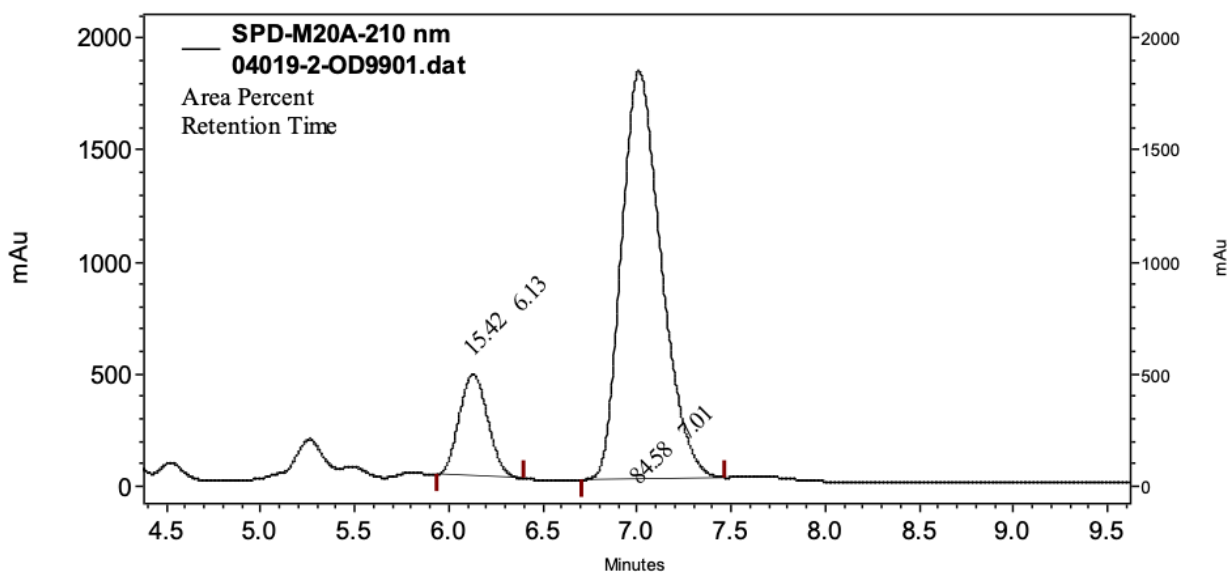

Phenyl (1*R*,2*R*,3*R*,4*S*)-3-((*E*)-3-oxoprop-1-en-1-yl)bicyclo[2.2.1]hept-5-ene-2-carboxylate (3zc):

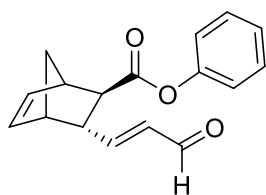

An inseparable mixture with side-product. The product yield was determined by  $^1\text{H}$  NMR. HPLC (Chiralpak OD-H column, 95:5 hexanes/isopropanol, 1 ml/min),  $t_r = 18.91$  min (minor), 20.24 min (major); ee = 94%.

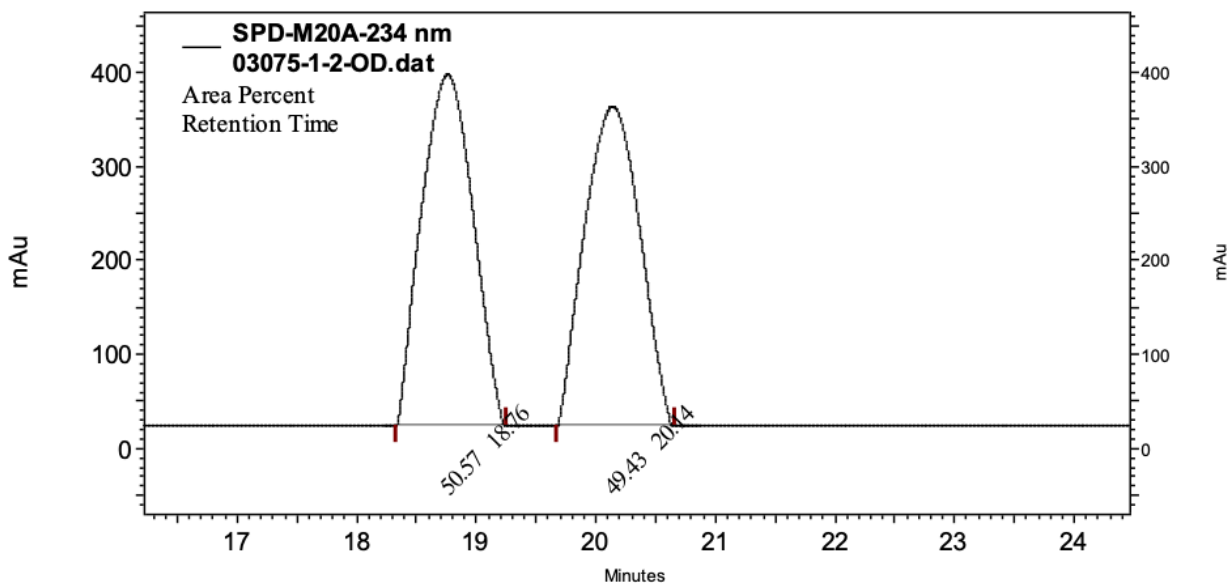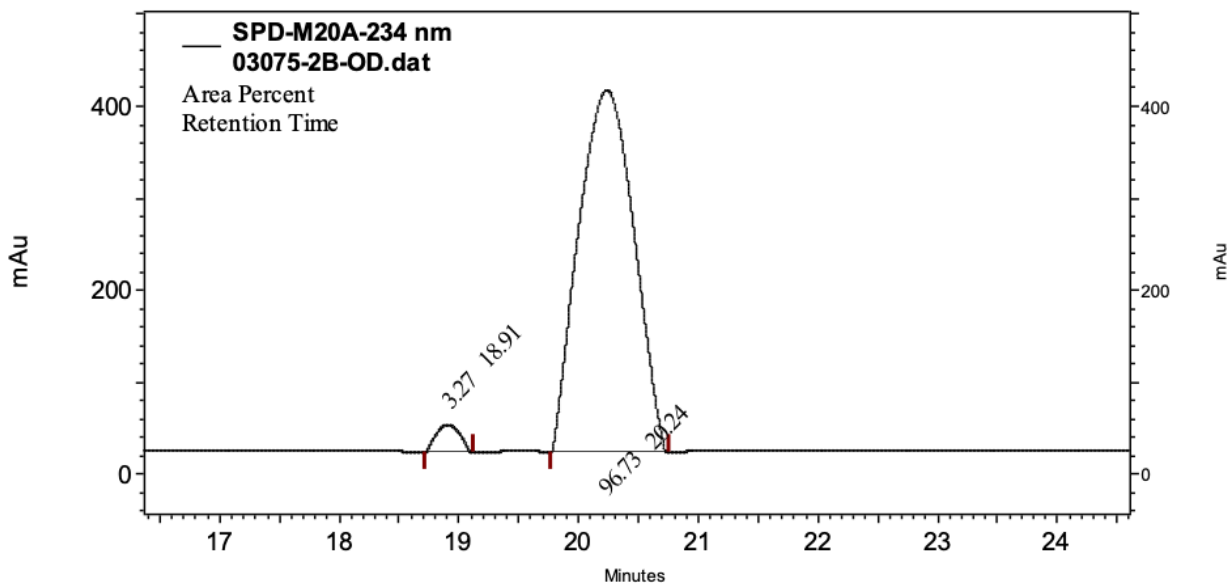

---

## 5. Full list of authors in the Gaussian09 reference

M. J. Frisch, G. W. Trucks, H. B. Schlegel, G. E. Scuseria, M. A. Robb, J. R. Cheeseman, G. Scalmani, V. Barone, B. Mennucci, G. A. Petersson, H. Nakatsuji, M. Caricato, X. Li, H. P. Hratchian, A. F. Izmaylov, J. Bloino, G. Zheng, J. L. Sonnenberg, M. Hada, M. Ehara, K. Toyota, R. Fukuda, J. Hasegawa, M. Ishida, T. Nakajima, Y. Honda, O. Kitao, H. Nakai, T. Vreven, J. A. Montgomery, Jr., J. E. Peralta, F. Ogliaro, M. Bearpark, J. J. Heyd, E. Brothers, K. N. Kudin, V. N. Staroverov, T. Keith, R. Kobayashi, J. Normand, K. Raghavachari, A. Rendell, J. C. Burant, S. S. Iyengar, J. Tomasi, M. Cossi, N. Rega, J. M. Millam, M. Klene, J. E. Knox, J. B. Cross, V. Bakken, C. Adamo, J. Jaramillo, R. Gomperts, R. E. Stratmann, O. Yazyev, A. J. Austin, R. Cammi, C. Pomelli, J. W. Ochterski, R. L. Martin, K. Morokuma, V. G. Zakrzewski, G. A. Voth, P. Salvador, J. J. Dannenberg, S. Dapprich, A. D. Daniels, O. Farkas, J. B. Foresman, J. V. Ortiz, J. Cioslowski, and D. J. Fox, Gaussian, Inc., Wallingford CT, 2013.

---

## 6. Computational Methods

Catalyst-substrate structures (**4g-4y**) were optimized in the gas-phase with the M06 density functional,<sup>7</sup> and the triple- $\zeta$  valence quality def2-TZVP basis set of Weigend and Ahlrichs,<sup>8</sup> as implemented in Gaussian 09 (revision D.01).<sup>9</sup> All of the optimized geometries were verified by frequency computations as minima (zero imaginary frequencies). Parameters were acquired from these ground state structures. NBO charges were calculated using NBO6,<sup>10</sup> at the same level. Sterimol values were calculated using a modified version of Paton's Python script.<sup>11</sup> Multidimensional regression analyses were performed using MATLAB®.<sup>12</sup> Substrate structures, 3b-3s, were optimized with the M06-2X density functional,<sup>7</sup> and the triple- $\zeta$  valence quality def2-TZVP basis set.<sup>8</sup> NBO charges were calculated at the same level using NBO6.<sup>10</sup> For the substrate calculations with the model catalyst system, transition states were located with the B3LYP density functional<sup>13,14</sup> and the split-valence polarized 6-31G(d,p) basis set.<sup>15,16</sup> Single point energy calculations were performed on the resulting structures at the M06-2X/6-31G(d,p) level. These single point calculations were used to correct the gas phase energy. Similarly, parameters were collected from the lowest energy structure determined from this process and NBO charges were calculated at the M06-2X/def2-TZVP level of theory.

Transition states with the full catalyst system were located with the M06 density functional and a mixed basis set of lanl2dz<sup>17,18</sup> for gold and 6-31G(d) for all other atoms, unless otherwise noted. Single point energy calculations were performed on the resulting structures using the M06 density functional and the def2-TZVP basis set. These single point calculations were used to correct the gas phase energy. Free energies in solution were derived from structures optimized in the gas phase by means of a single point calculation using M06/def2-TZVP with the polarizable continuum model (IEFPCM).<sup>19</sup>

---

Conformational searches were performed with Macromodel version 11.7<sup>20</sup> and the OPLS\_2005 force field.<sup>21-23</sup> Other conformers that could not be located using this method were generated by hand.

## 7. Cartesian Coordinates

### 7.1 Cartesian coordinates of the transition state structures with the full catalyst system

#### TS1

M06/lanl2dz-6-31G(d) Energy = -2646.117328

M06/lanl2dz-6-31G(d) Free Energy = -2645.482352

M06/def2-TZVP Derived free energy = -2646.594240

M06/def2-TZVP Derived free energy in solution (toluene) = -2646.625573

M06/def2-TZVP Derived free energy in solution (nitromethane) = -2646.651607

Number of Imaginary Frequencies = 1 (-372.18)

#### M06/lanl2dz-6-31G(d) Geometry

|   |          |          |          |
|---|----------|----------|----------|
| C | 3.67740  | -1.54269 | -0.23666 |
| C | 4.90564  | -2.32652 | 0.26867  |
| C | 2.63767  | -2.35270 | 1.89298  |
| N | 2.63915  | -1.52485 | 0.79476  |
| C | 1.51707  | -0.77260 | 0.81869  |
| N | 0.89270  | -1.19244 | 1.92785  |
| N | 1.57327  | -2.17108 | 2.61503  |
| C | 5.59175  | -2.77683 | -1.01730 |
| C | 4.43871  | -2.94980 | -1.96991 |
| C | 3.31184  | -2.26989 | -1.50449 |
| C | 2.10734  | -2.30701 | -2.19200 |
| C | 2.05041  | -3.03428 | -3.38034 |
| C | 3.17591  | -3.70148 | -3.85932 |
| C | 4.37850  | -3.66688 | -3.15547 |
| C | -0.39998 | -0.78715 | 2.37251  |
| C | -0.55798 | 0.47406  | 3.00800  |
| C | -1.86770 | 0.86075  | 3.41979  |

---

|    |          |          |          |
|----|----------|----------|----------|
| C  | -2.94649 | -0.03363 | 3.21590  |
| C  | -2.76364 | -1.25190 | 2.61493  |
| C  | -1.47577 | -1.62717 | 2.17810  |
| C  | 0.52216  | 1.35723  | 3.24011  |
| C  | 0.30847  | 2.58115  | 3.82348  |
| C  | -0.98834 | 2.97247  | 4.21982  |
| C  | -2.05009 | 2.12504  | 4.02853  |
| H  | 3.94954  | -0.49376 | -0.43781 |
| H  | 5.54331  | -1.71944 | 0.93588  |
| H  | 6.16711  | -3.69378 | -0.84140 |
| H  | 6.29477  | -2.00463 | -1.36422 |
| H  | 1.21173  | -1.80964 | -1.81471 |
| H  | 1.11542  | -3.08484 | -3.93480 |
| H  | 3.11248  | -4.26706 | -4.78707 |
| H  | 5.24981  | -4.20782 | -3.52241 |
| H  | -3.94030 | 0.26188  | 3.55383  |
| H  | -3.59130 | -1.94067 | 2.45860  |
| Cl | -1.28229 | -3.14777 | 1.36927  |
| H  | 1.52822  | 1.06073  | 2.95322  |
| H  | 1.14984  | 3.25272  | 3.98379  |
| H  | -1.14031 | 3.94441  | 4.68424  |
| H  | -3.05312 | 2.41127  | 4.34401  |
| Au | 0.96928  | 0.86167  | -0.49089 |
| C  | 0.50284  | 2.45376  | -1.69731 |
| C  | 1.30983  | 3.59028  | -1.52041 |
| C  | -0.51492 | 2.44184  | -2.63654 |
| C  | 1.06170  | 4.72532  | -2.28867 |
| C  | -0.75092 | 3.58591  | -3.40475 |
| H  | -1.11788 | 1.54793  | -2.79187 |
| C  | 0.03148  | 4.72065  | -3.22527 |
| H  | 1.67375  | 5.61893  | -2.16860 |
| H  | -1.54529 | 3.58369  | -4.14943 |
| H  | -0.15576 | 5.60965  | -3.82448 |
| C  | 2.43124  | 2.16898  | 0.09268  |
| C  | 3.39519  | 1.88557  | 1.04789  |
| C  | 2.36790  | 3.43154  | -0.52541 |



---

|   |          |          |          |
|---|----------|----------|----------|
| C | 4.31919  | 2.87079  | 1.40809  |
| H | 3.44764  | 0.90905  | 1.53044  |
| C | 3.30000  | 4.39970  | -0.15375 |
| C | 4.26732  | 4.12218  | 0.80710  |
| H | 5.07650  | 2.65228  | 2.15878  |
| H | 3.27102  | 5.38432  | -0.61950 |
| H | 4.98616  | 4.89008  | 1.08584  |
| O | -0.72234 | -0.39442 | -1.19564 |
| C | -2.99385 | -0.98117 | -0.97603 |
| C | -1.87235 | -0.17623 | -0.73017 |
| C | -5.35933 | -1.46094 | -0.37722 |
| C | -4.18890 | -0.69194 | -0.34720 |
| C | -6.47835 | -1.18346 | 0.42260  |
| H | -2.02981 | 0.70912  | -0.07944 |
| H | -4.20216 | 0.19941  | 0.29326  |
| H | -2.87779 | -1.86678 | -1.60115 |
| C | -7.36225 | -2.30473 | 0.88969  |
| H | -6.33780 | -0.37727 | 1.15297  |
| H | -5.36264 | -2.36845 | -0.98564 |
| H | -7.49915 | -3.05808 | 0.10356  |
| H | -6.89751 | -2.80995 | 1.74809  |
| H | -8.35089 | -1.95534 | 1.21134  |
| C | -7.77001 | -0.03276 | -0.69900 |
| C | -8.17405 | -0.92263 | -1.69488 |
| C | -7.24674 | -0.88736 | -2.76476 |
| C | -6.33023 | 0.10057  | -2.51797 |
| C | -6.77750 | 0.89677  | -1.34346 |
| H | -8.43595 | 0.29210  | 0.10007  |
| H | -9.01235 | -1.61072 | -1.61770 |
| H | -7.24368 | -1.56158 | -3.61589 |
| H | -5.47684 | 0.35627  | -3.14007 |
| H | -5.98373 | 1.29380  | -0.70289 |
| H | -7.34310 | 1.76873  | -1.71861 |
| C | 3.80644  | -3.24544 | 2.14150  |
| H | 4.47520  | -2.77214 | 2.88463  |
| H | 3.47487  | -4.20475 | 2.55157  |

---

O 4.48246 -3.49868 0.94136

**TS2**

M06/lanl2dz-6-31G(d) Energy = -2646.114718

M06/lanl2dz-6-31G(d) Free Energy = -2645.480221

M06/def2-TZVP Derived free energy = -2646.592129

M06/def2-TZVP Derived free energy in solution (toluene) = -2646.623262

M06/def2-TZVP Derived free energy in solution (nitromethane) = -2646.648663

Number of Imaginary Frequencies = 1 (-381.61)

M06/lanl2dz-6-31G(d) Geometry

|   |          |          |          |
|---|----------|----------|----------|
| C | -0.97518 | 3.08190  | -0.32308 |
| C | -0.83521 | 4.39085  | -1.12960 |
| C | -1.86175 | 2.20314  | -2.49815 |
| N | -1.42080 | 2.00233  | -1.21111 |
| C | -1.44238 | 0.67572  | -0.95069 |
| N | -1.89685 | 0.14739  | -2.09955 |
| N | -2.15825 | 1.07831  | -3.07543 |
| C | -0.99446 | 5.48362  | -0.07819 |
| C | -1.90938 | 4.85059  | 0.93493  |
| C | -1.92972 | 3.46371  | 0.77952  |
| C | -2.70586 | 2.66050  | 1.60302  |
| C | -3.47190 | 3.26918  | 2.59577  |
| C | -3.45020 | 4.65287  | 2.75731  |
| C | -2.66776 | 5.45376  | 1.92773  |
| C | -2.11598 | -1.23832 | -2.34668 |
| C | -0.99647 | -2.11300 | -2.38740 |
| C | -1.24092 | -3.51209 | -2.49729 |
| C | -2.57335 | -3.97626 | -2.60714 |
| C | -3.63100 | -3.10677 | -2.62606 |
| C | -3.39717 | -1.72357 | -2.49309 |
| C | 0.34323  | -1.65424 | -2.33651 |
| C | 1.38516  | -2.54842 | -2.36977 |
| C | 1.14466  | -3.93688 | -2.44415 |
| C | -0.14281 | -4.40452 | -2.51112 |
| H | 0.00234  | 2.76738  | 0.07510  |

---

|    |          |          |          |
|----|----------|----------|----------|
| H  | 0.11741  | 4.43597  | -1.68682 |
| H  | -1.39506 | 6.39668  | -0.53546 |
| H  | -0.01734 | 5.73446  | 0.36153  |
| H  | -2.73428 | 1.57681  | 1.48018  |
| H  | -4.09410 | 2.65714  | 3.24568  |
| H  | -4.05675 | 5.11377  | 3.53458  |
| H  | -2.66321 | 6.53628  | 2.04882  |
| H  | -2.74887 | -5.04813 | -2.68972 |
| H  | -4.65466 | -3.45959 | -2.72368 |
| Cl | -4.76969 | -0.66208 | -2.45717 |
| H  | 0.54424  | -0.58425 | -2.30962 |
| H  | 2.40983  | -2.17806 | -2.36216 |
| H  | 1.98137  | -4.63179 | -2.46460 |
| H  | -0.34295 | -5.47277 | -2.58691 |
| Au | -0.60931 | -0.31394 | 0.80084  |
| C  | 0.19342  | -1.26198 | 2.43677  |
| C  | -0.63515 | -2.23189 | 3.02799  |
| C  | 1.44687  | -0.99197 | 2.96169  |
| C  | -0.16839 | -2.95189 | 4.12501  |
| C  | 1.90242  | -1.71541 | 4.06786  |
| H  | 2.07409  | -0.20820 | 2.53782  |
| C  | 1.10042  | -2.69652 | 4.63816  |
| H  | -0.79845 | -3.70651 | 4.59526  |
| H  | 2.88422  | -1.50239 | 4.48816  |
| H  | 1.45650  | -3.25869 | 5.49938  |
| C  | -2.21977 | -1.42596 | 1.38699  |
| C  | -3.46260 | -1.33326 | 0.78958  |
| C  | -1.96567 | -2.32834 | 2.43409  |
| C  | -4.48228 | -2.19387 | 1.20624  |
| H  | -3.66527 | -0.60338 | 0.00922  |
| C  | -2.99626 | -3.17732 | 2.83444  |
| C  | -4.24300 | -3.11615 | 2.21716  |
| H  | -5.46051 | -2.12901 | 0.73124  |
| H  | -2.82939 | -3.88962 | 3.64206  |
| H  | -5.03637 | -3.78747 | 2.54003  |
| O  | 1.25358  | 0.81245  | 0.23321  |

---

|   |          |          |          |
|---|----------|----------|----------|
| C | 3.48767  | 0.82175  | -0.50987 |
| C | 2.32017  | 0.20118  | -0.04467 |
| C | 5.82448  | 0.56313  | -1.30128 |
| C | 4.61952  | 0.07476  | -0.78597 |
| C | 6.89792  | -0.25673 | -1.68407 |
| H | 2.35373  | -0.90005 | 0.08020  |
| H | 4.55194  | -1.00824 | -0.62086 |
| H | 3.48248  | 1.90262  | -0.65548 |
| C | 7.80338  | 0.17591  | -2.80151 |
| H | 6.69859  | -1.33368 | -1.64609 |
| H | 5.89964  | 1.63710  | -1.48974 |
| H | 7.99448  | 1.25574  | -2.76162 |
| H | 8.76657  | -0.34840 | -2.79116 |
| H | 7.32456  | -0.03656 | -3.76728 |
| C | 8.18770  | -0.37692 | -0.08476 |
| C | 8.66347  | 0.93077  | 0.01686  |
| C | 7.78840  | 1.69149  | 0.83126  |
| C | 6.83441  | 0.85594  | 1.34802  |
| C | 7.19520  | -0.55201 | 1.03193  |
| H | 8.80812  | -1.19799 | -0.44292 |
| H | 9.51804  | 1.32980  | -0.52421 |
| H | 7.84704  | 2.76496  | 0.98347  |
| H | 6.00452  | 1.14586  | 1.98673  |
| H | 7.74380  | -0.96720 | 1.89651  |
| H | 6.35538  | -1.22839 | 0.84300  |
| O | -1.91979 | 4.52351  | -2.02998 |
| C | -1.89535 | 3.58112  | -3.06536 |
| H | -1.01725 | 3.73000  | -3.72121 |
| H | -2.79489 | 3.72300  | -3.67298 |

### TS3

M06/lanl2dz-6-31G(d) Energy = -2646.117014

M06/lanl2dz-6-31G(d) Free Energy = -2645.480715

M06/def2-TZVP Derived free energy = -2646.593025

M06/def2-TZVP Derived free energy in solution (toluene) = -2646.623504

M06/def2-TZVP Derived free energy in solution (nitromethane) = -2646.648284

---

Number of Imaginary Frequencies = 1 (-393.76)

M06/lanl2dz-6-31G(d) Geometry

|   |          |          |          |
|---|----------|----------|----------|
| C | -0.05937 | 3.03952  | 0.23877  |
| C | 0.25686  | 4.43773  | -0.33501 |
| C | -1.34766 | 2.78992  | -1.89525 |
| N | -0.81120 | 2.25677  | -0.74813 |
| C | -1.09170 | 0.93344  | -0.71373 |
| N | -1.78848 | 0.74050  | -1.84595 |
| N | -1.95717 | 1.88191  | -2.59613 |
| C | 0.43637  | 5.30715  | 0.90488  |
| C | -0.47301 | 4.65738  | 1.91202  |
| C | -0.79097 | 3.35608  | 1.51931  |
| C | -1.61768 | 2.55510  | 2.29468  |
| C | -2.12832 | 3.07727  | 3.48194  |
| C | -1.80851 | 4.37367  | 3.87944  |
| C | -0.97844 | 5.17348  | 3.09660  |
| C | -2.33899 | -0.49067 | -2.30752 |
| C | -3.75286 | -0.64770 | -2.33190 |
| C | -4.28008 | -1.91481 | -2.71713 |
| C | -3.39354 | -2.95615 | -3.07946 |
| C | -2.03691 | -2.77060 | -3.07866 |
| C | -1.51182 | -1.52188 | -2.69368 |
| C | -4.65083 | 0.38488  | -1.96713 |
| C | -6.00584 | 0.16326  | -1.97981 |
| C | -6.52988 | -1.09223 | -2.35608 |
| C | -5.68215 | -2.10690 | -2.71866 |
| H | 0.87103  | 2.48331  | 0.42961  |
| H | 1.13372  | 4.42222  | -1.00619 |
| H | 0.18339  | 6.35017  | 0.67819  |
| H | 1.48565  | 5.28620  | 1.23602  |
| H | -1.87812 | 1.54021  | 1.99121  |
| H | -2.78177 | 2.46587  | 4.10107  |
| H | -2.21643 | 4.76805  | 4.80827  |
| H | -0.74015 | 6.19087  | 3.40441  |
| H | -3.80957 | -3.91967 | -3.37129 |

---

|    |          |          |          |
|----|----------|----------|----------|
| H  | -1.35408 | -3.56368 | -3.37184 |
| Cl | 0.21861  | -1.31569 | -2.74185 |
| H  | -4.26277 | 1.36348  | -1.69215 |
| H  | -6.68415 | 0.96787  | -1.70278 |
| H  | -7.60645 | -1.24813 | -2.36275 |
| H  | -6.07282 | -3.07922 | -3.01693 |
| Au | -0.31844 | -0.49977 | 0.73190  |
| C  | 0.42696  | -1.88326 | 2.05331  |
| C  | -0.52282 | -2.77152 | 2.58558  |
| C  | 1.76083  | -1.97396 | 2.41610  |
| C  | -0.10308 | -3.77827 | 3.45201  |
| C  | 2.16992  | -2.98321 | 3.29232  |
| H  | 2.48777  | -1.25527 | 2.03856  |
| C  | 1.24142  | -3.88548 | 3.79762  |
| H  | -0.82425 | -4.47945 | 3.87150  |
| H  | 3.21651  | -3.05672 | 3.58495  |
| H  | 1.56207  | -4.67242 | 4.47762  |
| C  | -2.06339 | -1.36468 | 1.35773  |
| C  | -3.31538 | -0.91989 | 0.97653  |
| C  | -1.89926 | -2.48493 | 2.19188  |
| C  | -4.44591 | -1.62819 | 1.39370  |
| H  | -3.43983 | -0.03378 | 0.35799  |
| C  | -3.03954 | -3.17674 | 2.59726  |
| C  | -4.30322 | -2.75538 | 2.19278  |
| H  | -5.43373 | -1.28744 | 1.08742  |
| H  | -2.94327 | -4.04925 | 3.24281  |
| H  | -5.18329 | -3.30893 | 2.51444  |
| O  | 1.70292  | 0.29126  | 0.13683  |
| C  | 3.72209  | -0.09946 | -1.02479 |
| C  | 2.49283  | -0.48276 | -0.46580 |
| C  | 5.76121  | -0.85589 | -2.24293 |
| C  | 4.49717  | -1.04818 | -1.67459 |
| C  | 6.45241  | 0.36014  | -2.19602 |
| H  | 2.22154  | -1.55229 | -0.56315 |
| H  | 4.07647  | -2.05607 | -1.74048 |
| H  | 4.01215  | 0.94862  | -0.95693 |

---

|   |          |          |          |
|---|----------|----------|----------|
| C | 7.58170  | 0.61322  | -3.15192 |
| H | 5.86947  | 1.24805  | -1.94493 |
| H | 6.23904  | -1.70548 | -2.73227 |
| H | 8.21838  | 1.45170  | -2.84873 |
| H | 8.21386  | -0.27307 | -3.28812 |
| H | 7.16417  | 0.86398  | -4.13713 |
| C | 7.46838  | 0.35126  | -0.36832 |
| C | 6.46996  | 0.35234  | 0.60384  |
| C | 6.14826  | -0.98430 | 0.95865  |
| C | 6.98984  | -1.83279 | 0.29868  |
| C | 8.04289  | -1.04287 | -0.39381 |
| H | 8.07419  | 1.23097  | -0.57969 |
| H | 5.97725  | 1.23788  | 0.99830  |
| H | 5.33289  | -1.27700 | 1.61429  |
| H | 6.97773  | -2.91754 | 0.35052  |
| H | 8.95066  | -1.04565 | 0.23628  |
| H | 8.34995  | -1.42979 | -1.37120 |
| O | -0.86701 | 4.94087  | -1.03391 |
| C | -1.14303 | 4.23248  | -2.20959 |
| H | -0.32001 | 4.33519  | -2.94134 |
| H | -2.04549 | 4.65955  | -2.65899 |

#### TS4

M06/lanl2dz-6-31G(d) Energy = -2646.117511

M06/lanl2dz-6-31G(d) Free Energy = -2645.482023

M06/def2-TZVP Derived free energy = -2646.592162

M06/def2-TZVP Derived free energy in solution (toluene) = -2646.623131

M06/def2-TZVP Derived free energy in solution (nitromethane) = -2646.647825

Number of Imaginary Frequencies = 1 (-401.91)

M06/lanl2dz-6-31G(d) Geometry

|   |          |          |         |
|---|----------|----------|---------|
| C | -3.04534 | -0.66004 | 2.27057 |
| C | -3.50405 | -1.63401 | 3.37424 |
| C | -2.80562 | -2.83229 | 1.00584 |
| N | -2.54353 | -1.48561 | 1.14343 |
| C | -1.78739 | -1.09351 | 0.08994 |

---

|    |          |          |          |
|----|----------|----------|----------|
| N  | -1.62818 | -2.22045 | -0.61321 |
| N  | -2.25261 | -3.31373 | -0.06699 |
| C  | -2.21686 | -1.95617 | 4.16073  |
| C  | -1.45079 | -0.67009 | 4.02670  |
| C  | -1.94735 | 0.09266  | 2.96412  |
| C  | -1.46745 | 1.37237  | 2.70852  |
| C  | -0.42859 | 1.86377  | 3.49748  |
| C  | 0.09360  | 1.09224  | 4.53635  |
| C  | -0.42234 | -0.17250 | 4.81759  |
| C  | -0.90527 | -2.34382 | -1.83669 |
| C  | 0.41800  | -2.85814 | -1.80648 |
| C  | 1.13129  | -2.94111 | -3.03664 |
| C  | 0.49839  | -2.52657 | -4.23352 |
| C  | -0.78538 | -2.04910 | -4.23665 |
| C  | -1.49411 | -1.96002 | -3.02130 |
| C  | 1.05302  | -3.27848 | -0.61440 |
| C  | 2.33723  | -3.76137 | -0.64598 |
| C  | 3.04928  | -3.84266 | -1.86291 |
| C  | 2.45669  | -3.43847 | -3.03207 |
| H  | -3.85693 | -0.03073 | 1.88323  |
| H  | -4.18252 | -1.07526 | 4.03101  |
| H  | -1.66792 | -2.79737 | 3.70832  |
| H  | -2.42772 | -2.23821 | 5.19900  |
| H  | -1.90935 | 1.99121  | 1.92756  |
| H  | -0.04164 | 2.86486  | 3.31546  |
| H  | 0.89239  | 1.49568  | 5.15634  |
| H  | -0.03945 | -0.75031 | 5.65793  |
| H  | 1.05158  | -2.59777 | -5.16948 |
| H  | -1.27524 | -1.73848 | -5.15597 |
| Cl | -3.12466 | -1.36864 | -3.05454 |
| H  | 0.51648  | -3.21535 | 0.33116  |
| H  | 2.81413  | -4.08413 | 0.27792  |
| H  | 4.06637  | -4.23002 | -1.86798 |
| H  | 2.99139  | -3.50000 | -3.97957 |
| Au | -0.85949 | 0.78136  | -0.42955 |
| C  | 0.02399  | 2.57016  | -0.89894 |



---

|   |          |          |          |
|---|----------|----------|----------|
| C | -0.86642 | 3.64012  | -1.08934 |
| C | 1.39307  | 2.75432  | -1.01231 |
| C | -0.35634 | 4.90810  | -1.36374 |
| C | 1.89192  | 4.02965  | -1.29428 |
| H | 2.07537  | 1.90986  | -0.89755 |
| C | 1.01909  | 5.09988  | -1.46117 |
| H | -1.02925 | 5.75222  | -1.51326 |
| H | 2.96709  | 4.18377  | -1.39083 |
| H | 1.41077  | 6.09187  | -1.67816 |
| C | -2.53152 | 1.91029  | -0.74967 |
| C | -3.82249 | 1.41480  | -0.67551 |
| C | -2.27868 | 3.27143  | -1.00163 |
| C | -4.89979 | 2.28956  | -0.84320 |
| H | -4.00846 | 0.35403  | -0.50812 |
| C | -3.36779 | 4.12699  | -1.16366 |
| C | -4.66851 | 3.63894  | -1.08172 |
| H | -5.91756 | 1.90733  | -0.79073 |
| H | -3.20112 | 5.18566  | -1.36109 |
| H | -5.50757 | 4.31949  | -1.21151 |
| O | 1.09919  | -0.19273 | -0.11914 |
| C | 3.02283  | -0.53906 | 1.18578  |
| C | 1.66239  | -0.22380 | 1.00948  |
| C | 5.19981  | -1.04974 | 0.07450  |
| C | 3.82141  | -0.81308 | 0.08347  |
| C | 6.01548  | -0.99772 | 1.21081  |
| H | 1.06661  | 0.01547  | 1.91120  |
| H | 3.30473  | -0.83547 | -0.87967 |
| H | 3.40858  | -0.55825 | 2.20365  |
| C | 7.37312  | -1.63722 | 1.18141  |
| H | 5.51652  | -1.04341 | 2.18055  |
| H | 5.67071  | -1.25956 | -0.88788 |
| H | 8.01593  | -1.31292 | 2.00704  |
| H | 7.25729  | -2.72644 | 1.27208  |
| H | 7.89723  | -1.44741 | 0.23592  |
| C | 6.54255  | 1.01962  | 1.41183  |
| C | 5.35640  | 1.66318  | 1.75705  |

---

|   |          |          |          |
|---|----------|----------|----------|
| C | 4.70727  | 2.13312  | 0.58566  |
| C | 5.50161  | 1.87373  | -0.49461 |
| C | 6.82510  | 1.37765  | -0.02566 |
| H | 7.33951  | 0.84725  | 2.13327  |
| H | 4.96070  | 1.75073  | 2.76627  |
| H | 3.71745  | 2.58295  | 0.55977  |
| H | 5.26388  | 2.09555  | -1.53187 |
| H | 7.27851  | 0.59490  | -0.64273 |
| H | 7.53587  | 2.22359  | -0.02900 |
| O | -4.26198 | -2.71261 | 2.89429  |
| C | -3.58008 | -3.58546 | 2.03337  |
| H | -2.89950 | -4.25576 | 2.58655  |
| H | -4.33204 | -4.21791 | 1.54916  |

### ***Other conformations***

Conformer clustering notation: cyclopentadiene approach (top or bottom), aldehyde orientation (towards or away from the aromatic R substituent), aldehyde coordination site (site 1 or 2), orientation of cyclopentadiene with respect to the aldehyde (*endo* or *exo*) and aromatic group orientation (naphthyl substituent towards the aldehyde or away).

#### Top, away, 1, endo, towards

M06/lanl2dz-6-31G(d) Energy = -2646.116148

M06/lanl2dz-6-31G(d) Free Energy = -2645.478670

M06/def2-TZVP Derived free energy = -2646.589233

M06/def2-TZVP Derived free energy in solution (toluene) = -2646.620268

M06/def2-TZVP Derived free energy in solution (nitromethane) = -2646.645327

Number of Imaginary Frequencies = -1 (-387.23)

#### M06/lanl2dz-6-31G(d) Geometry

|   |          |         |          |
|---|----------|---------|----------|
| C | -3.25798 | 2.45224 | -0.29758 |
| C | -3.52674 | 3.96825 | -0.29219 |
| C | -1.81349 | 3.11191 | 1.66978  |
| N | -2.17508 | 2.20809 | 0.69307  |
| C | -1.36630 | 1.12848 | 0.79642  |

---

|    |          |          |          |
|----|----------|----------|----------|
| N  | -0.56919 | 1.43636  | 1.82880  |
| N  | -0.82722 | 2.66433  | 2.38670  |
| C  | -2.45924 | 4.54664  | -1.24243 |
| C  | -2.29220 | 3.42384  | -2.22832 |
| C  | -2.79320 | 2.22776  | -1.70487 |
| C  | -2.83550 | 1.06608  | -2.46636 |
| C  | -2.29361 | 1.09254  | -3.74969 |
| C  | -1.75784 | 2.27385  | -4.26185 |
| C  | -1.77092 | 3.45078  | -3.51514 |
| C  | 0.55456  | 0.67817  | 2.27011  |
| C  | 0.35481  | -0.53298 | 2.98755  |
| C  | 1.50325  | -1.29439 | 3.35979  |
| C  | 2.79158  | -0.79732 | 3.04858  |
| C  | 2.95500  | 0.38751  | 2.38054  |
| C  | 1.82443  | 1.12335  | 1.97283  |
| C  | -0.92752 | -1.01639 | 3.33845  |
| C  | -1.06549 | -2.21421 | 3.99318  |
| C  | 0.06767  | -2.97761 | 4.34629  |
| C  | 1.32473  | -2.52121 | 4.04172  |
| H  | -4.12838 | 1.85695  | 0.00725  |
| H  | -4.51505 | 4.11926  | -0.74449 |
| H  | -1.51454 | 4.75471  | -0.71521 |
| H  | -2.78194 | 5.49100  | -1.69671 |
| H  | -3.30359 | 0.15886  | -2.08209 |
| H  | -2.30672 | 0.19077  | -4.35912 |
| H  | -1.34844 | 2.28369  | -5.27030 |
| H  | -1.38730 | 4.37780  | -3.93950 |
| H  | 3.66405  | -1.37240 | 3.36008  |
| H  | 3.94344  | 0.78381  | 2.16021  |
| Cl | 2.07438  | 2.58114  | 1.06269  |
| H  | -1.81050 | -0.43684 | 3.08041  |
| H  | -2.06131 | -2.57600 | 4.24264  |
| H  | -0.06008 | -3.92508 | 4.86515  |
| H  | 2.20780  | -3.09505 | 4.32126  |
| Au | -1.25978 | -0.67316 | -0.38251 |
| C  | -1.22480 | -2.38930 | -1.50943 |

---

|   |          |          |          |
|---|----------|----------|----------|
| C | -2.26330 | -3.29744 | -1.24007 |
| C | -0.29054 | -2.65098 | -2.49870 |
| C | -2.32755 | -4.48952 | -1.95837 |
| C | -0.36800 | -3.84902 | -3.21514 |
| H | 0.49162  | -1.92892 | -2.73221 |
| C | -1.37762 | -4.76370 | -2.93872 |
| H | -3.12319 | -5.20900 | -1.76547 |
| H | 0.36253  | -4.06106 | -3.99421 |
| H | -1.43418 | -5.69581 | -3.49781 |
| C | -2.95717 | -1.57359 | 0.31713  |
| C | -3.80396 | -1.01057 | 1.25903  |
| C | -3.21175 | -2.84738 | -0.22339 |
| C | -4.92388 | -1.72529 | 1.69267  |
| H | -3.61186 | -0.02055 | 1.67387  |
| C | -4.33389 | -3.54523 | 0.22306  |
| C | -5.18144 | -2.98961 | 1.17632  |
| H | -5.59169 | -1.28667 | 2.43193  |
| H | -4.55150 | -4.53365 | -0.18068 |
| H | -6.05335 | -3.54735 | 1.51238  |
| O | 0.62975  | 0.12400  | -1.22990 |
| C | 2.96437  | 0.01122  | -1.46027 |
| C | 1.73484  | -0.38125 | -0.90557 |
| C | 5.39493  | -0.42040 | -1.67885 |
| C | 4.12985  | -0.63980 | -1.11206 |
| C | 6.52666  | -1.19800 | -1.39004 |
| H | 1.76033  | -1.20288 | -0.15933 |
| H | 4.04910  | -1.43428 | -0.35896 |
| H | 2.96307  | 0.81113  | -2.20161 |
| C | 7.57474  | -1.41164 | -2.44522 |
| H | 6.34491  | -2.06394 | -0.74324 |
| H | 5.47119  | 0.33642  | -2.46340 |
| H | 7.24109  | -2.18802 | -3.14725 |
| H | 7.74546  | -0.49623 | -3.02607 |
| H | 8.53346  | -1.73933 | -2.02488 |
| C | 7.57578  | -0.21588 | 0.08160  |
| C | 8.01285  | 0.93720  | -0.57262 |

---

|   |          |          |          |
|---|----------|----------|----------|
| C | 6.99996  | 1.92402  | -0.51419 |
| C | 5.97557  | 1.45728  | 0.26781  |
| C | 6.41861  | 0.20656  | 0.94595  |
| H | 8.25504  | -1.01663 | 0.37297  |
| H | 8.94047  | 1.02537  | -1.13278 |
| H | 7.01304  | 2.86950  | -1.04811 |
| H | 5.03829  | 1.97246  | 0.47027  |
| H | 6.82968  | 0.47849  | 1.93544  |
| H | 5.64326  | -0.54835 | 1.11846  |
| O | -3.62841 | 4.51535  | 0.99773  |
| C | -2.45954 | 4.45260  | 1.76955  |
| H | -1.72867 | 5.22376  | 1.46992  |
| H | -2.74192 | 4.66279  | 2.80716  |

M06/lanl2dz-6-31G(d) Energy = -2646.113504

M06/lanl2dz-6-31G(d) Free Energy = -2645.473215

M06/def2-TZVP Derived free energy = -2646.582692

M06/def2-TZVP Derived free energy in solution (toluene) = -2646.613017

M06/def2-TZVP Derived free energy in solution (nitromethane) = -2646.637306

Number of Imaginary Frequencies = -1 (-382.42)

M06/lanl2dz-6-31G(d) Geometry

|   |          |          |         |
|---|----------|----------|---------|
| C | 1.03223  | -0.88431 | 3.51208 |
| C | -0.13686 | -0.90497 | 4.53748 |
| C | 0.61650  | 1.51746  | 3.31726 |
| N | 0.87942  | 0.32717  | 2.68036 |
| C | 1.04614  | 0.56507  | 1.35982 |
| N | 0.90145  | 1.90156  | 1.28194 |
| N | 0.62273  | 2.51320  | 2.48438 |
| C | -1.21423 | -1.76440 | 3.87015 |
| C | -0.41704 | -2.68905 | 2.99918 |
| C | 0.86550  | -2.18139 | 2.78796 |
| C | 1.79597  | -2.85547 | 2.00331 |
| C | 1.41204  | -4.05153 | 1.40150 |
| C | 0.12771  | -4.55811 | 1.60295 |
| C | -0.79123 | -3.88843 | 2.40845 |

---

|    |          |          |          |
|----|----------|----------|----------|
| C  | 1.09135  | 2.70026  | 0.11618  |
| C  | 2.34380  | 3.34722  | -0.06491 |
| C  | 2.56398  | 4.05896  | -1.27906 |
| C  | 1.52449  | 4.13486  | -2.23613 |
| C  | 0.30613  | 3.54865  | -2.01490 |
| C  | 0.09332  | 2.83033  | -0.82203 |
| C  | 3.37681  | 3.30125  | 0.90181  |
| C  | 4.57794  | 3.92213  | 0.66354  |
| C  | 4.80572  | 4.61186  | -0.54717 |
| C  | 3.81708  | 4.67980  | -1.49487 |
| H  | 2.01036  | -0.78763 | 4.00529  |
| H  | 0.24634  | -1.40627 | 5.44295  |
| H  | -1.85388 | -1.10798 | 3.25819  |
| H  | -1.85888 | -2.27173 | 4.59751  |
| H  | 2.80170  | -2.45709 | 1.85835  |
| H  | 2.11582  | -4.59101 | 0.77077  |
| H  | -0.15510 | -5.49703 | 1.12998  |
| H  | -1.78616 | -4.30136 | 2.57033  |
| H  | 1.70361  | 4.68303  | -3.16032 |
| H  | -0.50007 | 3.62379  | -2.73992 |
| Cl | -1.47347 | 2.11478  | -0.55533 |
| H  | 3.20614  | 2.78376  | 1.84473  |
| H  | 5.36151  | 3.88754  | 1.41802  |
| H  | 5.76460  | 5.09593  | -0.71944 |
| H  | 3.97769  | 5.21674  | -2.42911 |
| Au | 1.02621  | -0.89831 | -0.26473 |
| C  | 0.96199  | -2.28803 | -1.77183 |
| C  | 2.08874  | -2.31833 | -2.61062 |
| C  | -0.08179 | -3.18102 | -1.95075 |
| C  | 2.12566  | -3.22826 | -3.66566 |
| C  | -0.03084 | -4.09257 | -3.00920 |
| H  | -0.92708 | -3.19588 | -1.26270 |
| C  | 1.06341  | -4.10527 | -3.86694 |
| H  | 2.98970  | -3.26589 | -4.32894 |
| H  | -0.84770 | -4.79725 | -3.15704 |
| H  | 1.09906  | -4.81381 | -4.69239 |

---

|   |          |          |          |
|---|----------|----------|----------|
| C | 2.89027  | -0.64409 | -1.05941 |
| C | 3.82909  | 0.22273  | -0.53092 |
| C | 3.15024  | -1.39490 | -2.22059 |
| C | 5.05348  | 0.38450  | -1.18487 |
| H | 3.62636  | 0.78813  | 0.37607  |
| C | 4.38078  | -1.22551 | -2.85312 |
| C | 5.32188  | -0.33540 | -2.34259 |
| H | 5.78944  | 1.07769  | -0.77964 |
| H | 4.61201  | -1.79617 | -3.75245 |
| H | 6.27607  | -0.21059 | -2.85106 |
| O | -1.10748 | -1.18328 | 0.38902  |
| C | -3.40284 | -0.86902 | -0.02915 |
| C | -2.04946 | -0.93057 | -0.40259 |
| C | -5.74321 | -0.44106 | -0.74199 |
| C | -4.36172 | -0.52597 | -0.96147 |
| C | -6.67650 | -0.17791 | -1.75700 |
| H | -1.82310 | -0.73784 | -1.47081 |
| H | -4.00792 | -0.32679 | -1.98133 |
| H | -3.67227 | -1.07752 | 1.00710  |
| C | -8.05982 | -0.75821 | -1.66769 |
| H | -6.26087 | -0.14111 | -2.77050 |
| H | -6.11431 | -0.67407 | 0.25919  |
| H | -8.77844 | -0.23313 | -2.30879 |
| H | -8.04192 | -1.80938 | -1.98632 |
| H | -8.43379 | -0.73457 | -0.63614 |
| C | -7.03811 | 1.83686  | -1.74917 |
| C | -7.67641 | 2.03174  | -0.52227 |
| C | -6.70525 | 2.22236  | 0.48947  |
| C | -5.46698 | 2.27520  | -0.09550 |
| C | -5.63020 | 2.34060  | -1.57284 |
| H | -7.56561 | 1.91559  | -2.69964 |
| H | -8.74671 | 1.94209  | -0.35286 |
| H | -6.90949 | 2.26978  | 1.55495  |
| H | -4.51583 | 2.38293  | 0.41986  |
| H | -5.62278 | 3.40487  | -1.87006 |
| H | -4.85270 | 1.84503  | -2.16336 |

---

|   |          |         |         |
|---|----------|---------|---------|
| C | 0.24123  | 1.43831 | 4.75520 |
| H | 1.13135  | 1.30436 | 5.39560 |
| H | -0.27543 | 2.34856 | 5.07187 |
| O | -0.65936 | 0.36174 | 4.88015 |

M06/lanl2dz-6-31G(d) Energy = -2646.114746

M06/lanl2dz-6-31G(d) Free Energy = -2645.476715

M06/def2-TZVP Derived free energy = -2646.586823

M06/def2-TZVP Derived free energy in solution (toluene) = -2646.617614

M06/def2-TZVP Derived free energy in solution (nitromethane) = -2646.642135

Number of Imaginary Frequencies = -1 (-374.98)

M06/lanl2dz-6-31G(d) Geometry

|   |          |          |          |
|---|----------|----------|----------|
| C | 1.89214  | 3.15808  | -0.43963 |
| C | 1.64524  | 4.55329  | -1.04575 |
| C | 0.92201  | 2.46341  | -2.66575 |
| N | 1.27834  | 2.17036  | -1.36644 |
| C | 0.97261  | 0.87317  | -1.12693 |
| N | 0.44712  | 0.46112  | -2.28688 |
| N | 0.40478  | 1.42970  | -3.25866 |
| C | 0.23160  | 4.93315  | -0.56307 |
| C | 0.18462  | 4.26013  | 0.78009  |
| C | 1.15785  | 3.25852  | 0.86447  |
| C | 1.37741  | 2.56360  | 2.04780  |
| C | 0.56096  | 2.83865  | 3.14256  |
| C | -0.43340 | 3.81209  | 3.05188  |
| C | -0.61870 | 4.54019  | 1.87760  |
| C | -0.15712 | -0.80672 | -2.52722 |
| C | 0.65548  | -1.93853 | -2.80144 |
| C | 0.00695  | -3.19002 | -3.02297 |
| C | -1.40583 | -3.25597 | -2.97748 |
| C | -2.16640 | -2.14692 | -2.71140 |
| C | -1.52998 | -0.91165 | -2.47962 |
| C | 2.06803  | -1.87704 | -2.85893 |
| C | 2.80135  | -3.00956 | -3.11051 |
| C | 2.16325  | -4.25024 | -3.32508 |



---

|    |          |          |          |
|----|----------|----------|----------|
| C  | 0.79515  | -4.33557 | -3.28532 |
| H  | 2.95685  | 2.90685  | -0.35058 |
| H  | 2.36723  | 5.23625  | -0.58107 |
| H  | -0.54540 | 4.53447  | -1.23513 |
| H  | 0.08837  | 6.01930  | -0.52023 |
| H  | 2.18937  | 1.84061  | 2.13288  |
| H  | 0.71730  | 2.30704  | 4.07915  |
| H  | -1.05317 | 4.02834  | 3.92026  |
| H  | -1.36907 | 5.32845  | 1.82906  |
| H  | -1.88931 | -4.21576 | -3.15722 |
| H  | -3.25142 | -2.20222 | -2.66762 |
| Cl | -2.50619 | 0.47892  | -2.10459 |
| H  | 2.57243  | -0.92584 | -2.70132 |
| H  | 3.88707  | -2.94848 | -3.14686 |
| H  | 2.76091  | -5.13630 | -3.52708 |
| H  | 0.29198  | -5.28696 | -3.45508 |
| Au | 1.27224  | -0.36080 | 0.61730  |
| C  | 1.65346  | -1.46993 | 2.30498  |
| C  | 3.01602  | -1.69420 | 2.56950  |
| C  | 0.67917  | -1.93667 | 3.17276  |
| C  | 3.38089  | -2.41706 | 3.70317  |
| C  | 1.05776  | -2.65836 | 4.30854  |
| H  | -0.37616 | -1.73996 | 2.98736  |
| C  | 2.40190  | -2.90054 | 4.56647  |
| H  | 4.43199  | -2.60421 | 3.92259  |
| H  | 0.29606  | -3.02930 | 4.99246  |
| H  | 2.69303  | -3.46539 | 5.45007  |
| C  | 3.31746  | -0.38572 | 0.55046  |
| C  | 4.07041  | 0.21533  | -0.44614 |
| C  | 3.92943  | -1.10468 | 1.59337  |
| C  | 5.46388  | 0.11467  | -0.41184 |
| H  | 3.59542  | 0.75917  | -1.26282 |
| C  | 5.32133  | -1.19120 | 1.61126  |
| C  | 6.08254  | -0.58560 | 0.61663  |
| H  | 6.05792  | 0.58623  | -1.19256 |
| H  | 5.81918  | -1.73978 | 2.41028  |

---

|   |          |          |          |
|---|----------|----------|----------|
| H | 7.16747  | -0.66383 | 0.64557  |
| O | -0.93796 | -0.53744 | 0.78938  |
| C | -2.85022 | -1.92704 | 0.75831  |
| C | -1.47781 | -1.66218 | 0.59555  |
| C | -5.08246 | -1.16074 | 1.51496  |
| C | -3.73370 | -0.95877 | 1.20089  |
| C | -5.87723 | -0.18610 | 2.13871  |
| H | -0.83889 | -2.51380 | 0.29370  |
| H | -3.31181 | 0.03702  | 1.37526  |
| H | -3.19227 | -2.94583 | 0.57539  |
| C | -6.97335 | -0.60521 | 3.07637  |
| H | -5.34492 | 0.72569  | 2.43211  |
| H | -5.50144 | -2.15997 | 1.37014  |
| H | -7.71923 | 0.18353  | 3.23461  |
| H | -7.48877 | -1.50166 | 2.70865  |
| H | -6.54424 | -0.85266 | 4.05706  |
| C | -6.90918 | 0.81372  | 0.66580  |
| C | -7.78137 | -0.16916 | 0.19742  |
| C | -7.14086 | -0.92640 | -0.81475 |
| C | -5.92440 | -0.35836 | -1.08203 |
| C | -5.82344 | 0.94256  | -0.36788 |
| H | -7.24865 | 1.66235  | 1.25907  |
| H | -8.76173 | -0.38571 | 0.61481  |
| H | -7.53813 | -1.82984 | -1.26781 |
| H | -5.18641 | -0.71562 | -1.79507 |
| H | -4.82341 | 1.20624  | -0.00787 |
| H | -6.13020 | 1.74072  | -1.06808 |
| C | 1.07867  | 3.83452  | -3.23008 |
| H | 1.54125  | 3.78178  | -4.22189 |
| H | 0.08129  | 4.28898  | -3.36152 |
| O | 1.90964  | 4.62414  | -2.42315 |

Top, towards, 1, endo, towards

M06/lanl2dz-6-31G(d) Energy = -2646.117469

M06/lanl2dz-6-31G(d) Free Energy = -2645.479337

---

M06/def2-TZVP Derived free energy = -2646.588747

M06/def2-TZVP Derived free energy in solution (toluene) = -2646.619903

M06/def2-TZVP Derived free energy in solution (nitromethane) = -2646.645543

Number of Imaginary Frequencies = 1 (-380.15)

M06/lanl2dz-6-31G(d) Geometry

|   |          |          |          |
|---|----------|----------|----------|
| C | 0.35934  | -1.79129 | 2.70294  |
| C | -0.62325 | -2.08957 | 3.85031  |
| C | -0.25252 | 0.57161  | 3.33920  |
| N | 0.26168  | -0.33265 | 2.43398  |
| C | 0.62549  | 0.34412  | 1.31680  |
| N | 0.31359  | 1.61332  | 1.61274  |
| N | -0.23246 | 1.77880  | 2.86150  |
| C | -1.98947 | -2.22334 | 3.14545  |
| C | -1.58314 | -2.82918 | 1.83006  |
| C | -0.21998 | -2.61522 | 1.59105  |
| C | 0.41293  | -3.16350 | 0.48178  |
| C | -0.35629 | -3.87071 | -0.44144 |
| C | -1.72286 | -4.05039 | -0.22892 |
| C | -2.34192 | -3.55039 | 0.91709  |
| C | 0.37248  | 2.72109  | 0.71559  |
| C | 1.62431  | 3.30870  | 0.39354  |
| C | 1.63890  | 4.37329  | -0.55567 |
| C | 0.41765  | 4.82974  | -1.10437 |
| C | -0.78082 | 4.26186  | -0.75791 |
| C | -0.79426 | 3.19052  | 0.15387  |
| C | 2.84670  | 2.87677  | 0.95894  |
| C | 4.03189  | 3.45086  | 0.57371  |
| C | 4.05217  | 4.49237  | -0.37877 |
| C | 2.87884  | 4.94822  | -0.92327 |
| H | 1.40331  | -2.01797 | 2.95428  |
| H | -0.34923 | -3.06990 | 4.26000  |
| H | -2.46665 | -1.23891 | 2.99665  |
| H | -2.69358 | -2.83608 | 3.72062  |
| H | 1.48985  | -3.06315 | 0.34314  |
| H | 0.11847  | -4.29625 | -1.32348 |

---

|    |          |          |          |
|----|----------|----------|----------|
| H  | -2.30929 | -4.61058 | -0.95474 |
| H  | -3.40113 | -3.73624 | 1.09696  |
| H  | 0.44105  | 5.65208  | -1.81845 |
| H  | -1.71899 | 4.61433  | -1.17851 |
| Cl | -2.32220 | 2.43979  | 0.53726  |
| H  | 2.84588  | 2.08315  | 1.70212  |
| H  | 4.96483  | 3.09747  | 1.00924  |
| H  | 5.00076  | 4.93543  | -0.67383 |
| H  | 2.88075  | 5.75944  | -1.65040 |
| Au | 1.52854  | -0.37339 | -0.52126 |
| C  | 2.44492  | -1.10684 | -2.20318 |
| C  | 3.78391  | -1.49662 | -2.03388 |
| C  | 1.80506  | -1.24617 | -3.42255 |
| C  | 4.47323  | -2.03829 | -3.11685 |
| C  | 2.51008  | -1.78969 | -4.50081 |
| H  | 0.76949  | -0.93170 | -3.54279 |
| C  | 3.83462  | -2.18289 | -4.34564 |
| H  | 5.51167  | -2.35111 | -3.00853 |
| H  | 2.01835  | -1.90311 | -5.46574 |
| H  | 4.37754  | -2.60720 | -5.18812 |
| C  | 3.39458  | -0.74722 | 0.23691  |
| C  | 3.75981  | -0.51590 | 1.55425  |
| C  | 4.30807  | -1.28699 | -0.68736 |
| C  | 5.06189  | -0.80827 | 1.96974  |
| H  | 3.05402  | -0.10171 | 2.27517  |
| C  | 5.60311  | -1.57136 | -0.25358 |
| C  | 5.97757  | -1.33068 | 1.06448  |
| H  | 5.35237  | -0.62410 | 3.00255  |
| H  | 6.32944  | -1.98382 | -0.95333 |
| H  | 6.99221  | -1.55678 | 1.38641  |
| O  | -0.39130 | -0.09159 | -1.60991 |
| C  | -2.71717 | -0.41333 | -1.81326 |
| C  | -1.49889 | -0.41381 | -1.11381 |
| C  | -5.17199 | -0.80823 | -1.68941 |
| C  | -3.88094 | -0.73514 | -1.14727 |
| C  | -6.29013 | -1.23448 | -0.95552 |

---

|   |          |          |          |
|---|----------|----------|----------|
| H | -1.54535 | -0.72145 | -0.04731 |
| H | -3.77873 | -0.98795 | -0.08281 |
| H | -2.71914 | -0.14484 | -2.86975 |
| C | -7.42112 | -1.93384 | -1.65609 |
| H | -6.06529 | -1.62050 | 0.04597  |
| H | -5.29225 | -0.60106 | -2.75531 |
| H | -7.62284 | -1.47735 | -2.63352 |
| H | -7.15616 | -2.98494 | -1.83478 |
| H | -8.34902 | -1.92349 | -1.07109 |
| C | -7.19701 | 0.43140  | -0.19123 |
| C | -7.70023 | 1.05766  | -1.33423 |
| C | -6.69866 | 1.88296  | -1.89936 |
| C | -5.61303 | 1.89086  | -1.06279 |
| C | -5.98030 | 1.22018  | 0.21427  |
| H | -7.84648 | -0.04775 | 0.54135  |
| H | -8.67139 | 0.85911  | -1.78103 |
| H | -6.76799 | 2.38575  | -2.85940 |
| H | -4.66989 | 2.40494  | -1.23225 |
| H | -5.17549 | 0.66298  | 0.70607  |
| H | -6.31392 | 1.99629  | 0.92657  |
| C | -0.83136 | 0.13686  | 4.64306  |
| H | -0.42838 | 0.74633  | 5.45954  |
| H | -1.92230 | 0.30424  | 4.62275  |
| O | -0.51826 | -1.20004 | 4.92858  |

M06/lanl2dz-6-31G(d) Energy = -2646.114915

M06/lanl2dz-6-31G(d) Free Energy = -2645.477824

M06/def2-TZVP Derived free energy = -2646.590214

M06/def2-TZVP Derived free energy in solution (toluene) = -2646.621584

M06/def2-TZVP Derived free energy in solution (nitromethane) = -2646.647291

Number of Imaginary Frequencies = 1 (-381.36)

M06/lanl2dz-6-31G(d) Geometry

|   |          |         |          |
|---|----------|---------|----------|
| C | -0.60749 | 3.17936 | -0.11457 |
|---|----------|---------|----------|

---

|    |          |          |          |
|----|----------|----------|----------|
| C  | -0.72619 | 4.65688  | 0.31171  |
| C  | -1.03769 | 2.72261  | 2.30336  |
| N  | -0.95323 | 2.29784  | 0.99706  |
| C  | -1.12881 | 0.95557  | 0.96756  |
| N  | -1.30967 | 0.64649  | 2.25746  |
| N  | -1.25964 | 1.72636  | 3.10642  |
| C  | 0.20531  | 5.38093  | -0.65914 |
| C  | 1.27124  | 4.35326  | -0.93662 |
| C  | 0.82296  | 3.08374  | -0.57258 |
| C  | 1.64033  | 1.97089  | -0.67232 |
| C  | 2.92222  | 2.13432  | -1.19171 |
| C  | 3.36959  | 3.39362  | -1.58632 |
| C  | 2.54969  | 4.51454  | -1.45254 |
| C  | -1.39901 | -0.68120 | 2.77000  |
| C  | -2.63917 | -1.36870 | 2.72744  |
| C  | -2.66668 | -2.72279 | 3.17375  |
| C  | -1.47733 | -3.31392 | 3.66228  |
| C  | -0.29647 | -2.61948 | 3.70757  |
| C  | -0.25985 | -1.29010 | 3.24641  |
| C  | -3.83456 | -0.77519 | 2.25667  |
| C  | -4.99793 | -1.50219 | 2.21288  |
| C  | -5.02610 | -2.84688 | 2.64132  |
| C  | -3.88482 | -3.44021 | 3.11668  |
| H  | -1.30528 | 2.96057  | -0.93878 |
| H  | -1.76975 | 5.01678  | 0.28906  |
| H  | 0.58482  | 6.30552  | -0.20752 |
| H  | -0.34006 | 5.65835  | -1.57361 |
| H  | 1.29854  | 0.99668  | -0.32441 |
| H  | 3.57334  | 1.26485  | -1.28537 |
| H  | 4.37379  | 3.50820  | -1.99222 |
| H  | 2.91474  | 5.50043  | -1.73693 |
| H  | -1.51190 | -4.34660 | 4.00772  |
| H  | 0.61608  | -3.07389 | 4.08491  |
| Cl | 1.25430  | -0.43721 | 3.26323  |
| H  | -3.82980 | 0.26642  | 1.93995  |
| H  | -5.91083 | -1.03550 | 1.84825  |

---

|    |          |          |          |
|----|----------|----------|----------|
| H  | -5.95762 | -3.40694 | 2.59886  |
| H  | -3.89568 | -4.47479 | 3.45792  |
| Au | -1.27490 | -0.43330 | -0.69585 |
| C  | -1.49077 | -1.69754 | -2.29788 |
| C  | -2.52255 | -1.35246 | -3.18756 |
| C  | -0.70418 | -2.81486 | -2.52553 |
| C  | -2.72667 | -2.12672 | -4.32715 |
| C  | -0.92104 | -3.58644 | -3.67100 |
| H  | 0.06678  | -3.11148 | -1.81576 |
| C  | -1.92197 | -3.23662 | -4.56928 |
| H  | -3.52065 | -1.87425 | -5.02951 |
| H  | -0.30682 | -4.46645 | -3.85439 |
| H  | -2.08811 | -3.83815 | -5.46082 |
| C  | -2.94167 | 0.38745  | -1.55235 |
| C  | -3.65742 | 1.44236  | -1.00873 |
| C  | -3.32121 | -0.20141 | -2.77242 |
| C  | -4.76380 | 1.94850  | -1.69754 |
| H  | -3.37953 | 1.88119  | -0.05034 |
| C  | -4.42399 | 0.32213  | -3.44589 |
| C  | -5.13734 | 1.39213  | -2.91421 |
| H  | -5.32995 | 2.77615  | -1.27395 |
| H  | -4.73765 | -0.11612 | -4.39288 |
| H  | -5.99697 | 1.78722  | -3.45185 |
| O  | 0.54498  | -1.44199 | 0.09713  |
| C  | 2.85674  | -1.85843 | 0.04814  |
| C  | 1.64427  | -1.43964 | -0.51691 |
| C  | 5.29148  | -2.21638 | -0.23072 |
| C  | 4.03108  | -1.80420 | -0.68000 |
| C  | 6.44254  | -2.24694 | -1.03370 |
| H  | 1.67522  | -1.08115 | -1.56734 |
| H  | 3.96186  | -1.43827 | -1.71283 |
| H  | 2.84750  | -2.22032 | 1.07693  |
| C  | 7.50356  | -3.27847 | -0.77363 |
| H  | 6.27862  | -2.01604 | -2.09256 |
| H  | 5.36021  | -2.61228 | 0.78576  |
| H  | 7.64915  | -3.43491 | 0.30279  |

---

|   |          |          |          |
|---|----------|----------|----------|
| H | 7.19682  | -4.24028 | -1.20681 |
| H | 8.46930  | -3.01094 | -1.21939 |
| C | 7.45419  | -0.48987 | -0.72241 |
| C | 7.83519  | -0.57794 | 0.61767  |
| C | 6.79048  | -0.08795 | 1.43899  |
| C | 5.80365  | 0.42278  | 0.63740  |
| C | 6.29665  | 0.47037  | -0.76618 |
| H | 8.17092  | -0.56988 | -1.53936 |
| H | 8.74793  | -1.04485 | 0.97988  |
| H | 6.76164  | -0.15114 | 2.52256  |
| H | 4.85746  | 0.84496  | 0.96864  |
| H | 5.54879  | 0.28991  | -1.54611 |
| H | 6.70950  | 1.47916  | -0.94997 |
| O | -0.18527 | 4.82387  | 1.60848  |
| C | -0.92626 | 4.17787  | 2.60965  |
| H | -1.93847 | 4.61448  | 2.69825  |
| H | -0.41126 | 4.33049  | 3.56330  |

M06/lanl2dz-6-31G(d) Energy = -2646.117044

M06/lanl2dz-6-31G(d) Free Energy = -2645.479623

M06/def2-TZVP Derived free energy = -2646.589536

M06/def2-TZVP Derived free energy in solution (toluene) = -2646.620424

M06/def2-TZVP Derived free energy in solution (nitromethane) = -2646.645510

Number of Imaginary Frequencies = 1 (-390.18)

M06/lanl2dz-6-31G(d) Geometry

|   |          |          |         |
|---|----------|----------|---------|
| C | 0.72196  | -1.91830 | 2.68996 |
| C | -0.05586 | -2.29494 | 3.96494 |
| C | 0.12272  | 0.40003  | 3.48593 |
| N | 0.52443  | -0.45926 | 2.48520 |
| C | 0.72544  | 0.26731  | 1.35788 |
| N | 0.43463  | 1.51727  | 1.74250 |
| N | 0.05954  | 1.62507  | 3.05883 |
| C | -1.50359 | -2.49983 | 3.47267 |
| C | -1.26956 | -3.05696 | 2.09587 |
| C | 0.02262  | -2.74766 | 1.65398 |



---

|    |          |          |          |
|----|----------|----------|----------|
| C  | 0.50818  | -3.23504 | 0.44657  |
| C  | -0.34591 | -3.98449 | -0.36097 |
| C  | -1.64617 | -4.26473 | 0.05841  |
| C  | -2.11071 | -3.82108 | 1.29673  |
| C  | 0.38928  | 2.66601  | 0.89684  |
| C  | 1.59357  | 3.31851  | 0.52199  |
| C  | 1.50292  | 4.43263  | -0.36322 |
| C  | 0.23069  | 4.86822  | -0.80220 |
| C  | -0.91923 | 4.23627  | -0.40614 |
| C  | -0.83011 | 3.12007  | 0.44573  |
| C  | 2.86695  | 2.90871  | 0.98007  |
| C  | 4.00040  | 3.55353  | 0.55254  |
| C  | 3.91601  | 4.64534  | -0.33774 |
| C  | 2.69146  | 5.07911  | -0.77781 |
| H  | 1.80183  | -2.09736 | 2.76943  |
| H  | 0.33351  | -3.26310 | 4.30449  |
| H  | -2.05292 | -1.54414 | 3.42395  |
| H  | -2.07643 | -3.16334 | 4.13106  |
| H  | 1.54095  | -3.05734 | 0.14580  |
| H  | 0.01361  | -4.36712 | -1.31420 |
| H  | -2.29691 | -4.86341 | -0.57627 |
| H  | -3.11170 | -4.08586 | 1.63679  |
| H  | 0.17511  | 5.72763  | -1.46935 |
| H  | -1.89662 | 4.57303  | -0.74157 |
| Cl | -2.30022 | 2.30164  | 0.90118  |
| H  | 2.94687  | 2.08036  | 1.67972  |
| H  | 4.97303  | 3.21763  | 0.90734  |
| H  | 4.82442  | 5.14517  | -0.66657 |
| H  | 2.61263  | 5.92805  | -1.45598 |
| Au | 1.40193  | -0.33835 | -0.61018 |
| C  | 2.12516  | -0.94079 | -2.43323 |
| C  | 3.48129  | -1.30762 | -2.44681 |
| C  | 1.35132  | -1.00985 | -3.57868 |
| C  | 4.04973  | -1.75536 | -3.63742 |
| C  | 1.93588  | -1.45864 | -4.76711 |
| H  | 0.30355  | -0.71410 | -3.55654 |

---

|   |          |          |          |
|---|----------|----------|----------|
| C | 3.27589  | -1.82913 | -4.79209 |
| H | 5.09953  | -2.04596 | -3.67355 |
| H | 1.33822  | -1.51401 | -5.67558 |
| H | 3.72492  | -2.17868 | -5.71994 |
| C | 3.35662  | -0.68734 | -0.10867 |
| C | 3.87235  | -0.51216 | 1.16554  |
| C | 4.15836  | -1.16832 | -1.16027 |
| C | 5.21474  | -0.81097 | 1.41355  |
| H | 3.25130  | -0.13792 | 1.97977  |
| C | 5.49514  | -1.46317 | -0.89218 |
| C | 6.01922  | -1.28482 | 0.38425  |
| H | 5.62387  | -0.67274 | 2.41278  |
| H | 6.13696  | -1.83657 | -1.68961 |
| H | 7.06451  | -1.51960 | 0.57557  |
| O | -0.66286 | -0.10420 | -1.41807 |
| C | -2.97319 | -0.55046 | -1.33630 |
| C | -1.67263 | -0.52655 | -0.80284 |
| C | -5.38224 | -1.11581 | -0.89339 |
| C | -4.02003 | -1.01409 | -0.56187 |
| C | -5.96246 | -0.70906 | -2.10248 |
| H | -1.55521 | -0.91218 | 0.23168  |
| H | -3.74563 | -1.37044 | 0.43809  |
| H | -3.10509 | -0.20908 | -2.36343 |
| C | -7.19015 | -1.40556 | -2.61388 |
| H | -5.27199 | -0.37597 | -2.88332 |
| H | -6.03379 | -1.59680 | -0.16249 |
| H | -6.90072 | -2.33775 | -3.11861 |
| H | -7.86637 | -1.67310 | -1.79195 |
| H | -7.74723 | -0.80061 | -3.33971 |
| C | -6.63787 | 1.23473  | -1.80454 |
| C | -7.70778 | 1.03937  | -0.93077 |
| C | -7.23656 | 1.06152  | 0.40324  |
| C | -5.90458 | 1.38711  | 0.39435  |
| C | -5.50460 | 1.78133  | -0.98003 |
| H | -6.77610 | 1.49882  | -2.85250 |
| H | -8.72605 | 0.80279  | -1.22929 |

---

|   |          |          |          |
|---|----------|----------|----------|
| H | -7.82918 | 0.82435  | 1.28188  |
| H | -5.26586 | 1.48098  | 1.26866  |
| H | -5.53963 | 2.88380  | -1.04771 |
| H | -4.48985 | 1.48810  | -1.27336 |
| O | 0.15973  | -1.41881 | 5.03872  |
| C | -0.26624 | -0.09814 | 4.83607  |
| H | -1.35957 | 0.00016  | 4.95334  |
| H | 0.19716  | 0.51651  | 5.61559  |

Bottom, towards, 1, endo, towards

M06/lanl2dz-6-31G(d) Energy = -2646.116371

M06/lanl2dz-6-31G(d) Free Energy = -2645.477696

M06/def2-TZVP Derived free energy = -2646.587205

M06/def2-TZVP Derived free energy in solution (toluene) = -2646.618083

M06/def2-TZVP Derived free energy in solution (nitromethane) = -2646.642749

Number of Imaginary Frequencies = 1 (-375.97)

M06/lanl2dz-6-31G(d) Geometry

|   |          |          |          |
|---|----------|----------|----------|
| C | -2.50661 | 2.50455  | -1.40803 |
| C | -2.90849 | 3.98932  | -1.32981 |
| C | -3.07864 | 2.62965  | 1.04815  |
| N | -2.46483 | 1.99654  | -0.01241 |
| C | -1.86510 | 0.87563  | 0.45709  |
| N | -2.14682 | 0.89714  | 1.76474  |
| N | -2.90255 | 1.97348  | 2.15543  |
| C | -1.58244 | 4.72706  | -1.05274 |
| C | -0.59611 | 3.85664  | -1.78113 |
| C | -1.14174 | 2.59072  | -2.02552 |
| C | -0.45592 | 1.64045  | -2.77287 |
| C | 0.83061  | 1.94408  | -3.21547 |
| C | 1.39413  | 3.19039  | -2.94103 |
| C | 0.68038  | 4.16144  | -2.23863 |
| C | -1.68729 | -0.04993 | 2.72813  |
| C | -2.32782 | -1.31459 | 2.81518  |
| C | -1.82210 | -2.25959 | 3.75486  |

---

|    |          |          |          |
|----|----------|----------|----------|
| C  | -0.73062 | -1.89606 | 4.57897  |
| C  | -0.14144 | -0.66239 | 4.48518  |
| C  | -0.62215 | 0.26659  | 3.54156  |
| C  | -3.43339 | -1.67449 | 2.00947  |
| C  | -3.99176 | -2.92380 | 2.11153  |
| C  | -3.48510 | -3.86615 | 3.03158  |
| C  | -2.42727 | -3.53580 | 3.83982  |
| H  | -3.22653 | 1.89142  | -1.96516 |
| H  | -3.26396 | 4.27735  | -2.32715 |
| H  | -1.35700 | 4.76629  | 0.02503  |
| H  | -1.60460 | 5.76375  | -1.40860 |
| H  | -0.91648 | 0.68456  | -3.02320 |
| H  | 1.38659  | 1.20875  | -3.79460 |
| H  | 2.39450  | 3.41898  | -3.30465 |
| H  | 1.11135  | 5.14718  | -2.06750 |
| H  | -0.35738 | -2.62084 | 5.30186  |
| H  | 0.69539  | -0.38300 | 5.12024  |
| Cl | 0.16670  | 1.80906  | 3.41875  |
| H  | -3.84446 | -0.95236 | 1.30710  |
| H  | -4.83715 | -3.18782 | 1.47890  |
| H  | -3.94121 | -4.85115 | 3.10260  |
| H  | -2.03321 | -4.25115 | 4.56106  |
| Au | -0.64414 | -0.60964 | -0.51528 |
| C  | 0.51231  | -1.97526 | -1.51534 |
| C  | -0.17900 | -2.79778 | -2.42082 |
| C  | 1.88641  | -2.07189 | -1.36920 |
| C  | 0.53579  | -3.72776 | -3.17377 |
| C  | 2.59125  | -3.00826 | -2.13017 |
| H  | 2.40794  | -1.42522 | -0.66112 |
| C  | 1.91627  | -3.83148 | -3.02507 |
| H  | 0.02260  | -4.37740 | -3.88252 |
| H  | 3.67203  | -3.09758 | -2.01975 |
| H  | 2.46749  | -4.56138 | -3.61503 |
| C  | -2.09009 | -1.53328 | -1.62847 |
| C  | -3.43276 | -1.19390 | -1.58846 |
| C  | -1.62030 | -2.55769 | -2.47236 |

---

|   |          |          |          |
|---|----------|----------|----------|
| C | -4.34168 | -1.88609 | -2.39317 |
| H | -3.79351 | -0.40151 | -0.93210 |
| C | -2.54306 | -3.23642 | -3.26769 |
| C | -3.89367 | -2.90371 | -3.22684 |
| H | -5.39789 | -1.62445 | -2.36364 |
| H | -2.20622 | -4.03665 | -3.92625 |
| H | -4.60063 | -3.44474 | -3.85262 |
| O | 1.11262  | 0.15276  | 0.58583  |
| C | 2.88933  | 1.70137  | 0.52955  |
| C | 1.55692  | 1.30806  | 0.32933  |
| C | 5.18249  | 1.08930  | 1.24902  |
| C | 3.82484  | 0.82416  | 1.05309  |
| C | 6.06610  | 0.21799  | 1.90625  |
| H | 0.86372  | 2.06298  | -0.08660 |
| H | 3.44356  | -0.15333 | 1.36831  |
| H | 3.17178  | 2.71578  | 0.24852  |
| C | 7.25966  | 0.77670  | 2.62795  |
| H | 5.59453  | -0.64139 | 2.39560  |
| H | 5.56699  | 2.05812  | 0.91760  |
| H | 8.03091  | 0.01943  | 2.81429  |
| H | 7.71394  | 1.60248  | 2.06551  |
| H | 6.94873  | 1.17518  | 3.60334  |
| C | 6.93184  | -0.97878 | 0.48952  |
| C | 5.71101  | -1.35747 | -0.30591 |
| C | 5.59462  | -0.21864 | -1.25437 |
| C | 6.79537  | 0.43977  | -1.31128 |
| C | 7.64394  | -0.07377 | -0.30048 |
| H | 7.42468  | -1.68238 | 1.15993  |
| H | 4.80706  | -1.60641 | 0.26086  |
| H | 4.72271  | -0.03071 | -1.87678 |
| H | 7.04619  | 1.25127  | -1.98779 |
| O | -3.99014 | 4.23496  | -0.47109 |
| C | -3.76189 | 3.94442  | 0.88254  |
| H | -3.15863 | 4.72821  | 1.37252  |
| H | -4.73740 | 3.93026  | 1.38077  |
| H | 5.97545  | -2.25969 | -0.88743 |

---

H 8.65938 0.26275 -0.10609

Top, away, 2, endo, away

M06/lanl2dz-6-31G(d) Energy = -2646.113520

M06/lanl2dz-6-31G(d) Free Energy = -2645.474132

M06/def2-TZVP Derived free energy = -2646.583704

M06/def2-TZVP Derived free energy in solution (toluene) = -2646.614262

M06/def2-TZVP Derived free energy in solution (nitromethane) = -2646.638492

Number of Imaginary Frequencies = 1 (-381.56)

M06/lanl2dz-6-31G(d) Geometry

|   |          |          |          |
|---|----------|----------|----------|
| C | 0.63319  | 3.20543  | -0.38547 |
| C | 0.79822  | 4.65776  | 0.10092  |
| C | 0.50098  | 2.79444  | 2.10057  |
| N | 0.70371  | 2.33235  | 0.81872  |
| C | 0.84285  | 0.98668  | 0.86856  |
| N | 0.71472  | 0.71357  | 2.17737  |
| N | 0.49740  | 1.82087  | 2.96005  |
| C | 2.32299  | 4.86115  | 0.18577  |
| C | 2.80225  | 3.98467  | -0.93679 |
| C | 1.81926  | 3.05349  | -1.28989 |
| C | 1.98968  | 2.20553  | -2.37779 |
| C | 3.19713  | 2.24589  | -3.07174 |
| C | 4.19499  | 3.14423  | -2.69562 |
| C | 3.99861  | 4.03234  | -1.63958 |
| C | 0.73817  | -0.57977 | 2.77402  |
| C | -0.30945 | -1.49335 | 2.47411  |
| C | -0.22530 | -2.81235 | 3.00702  |
| C | 0.86427  | -3.15258 | 3.84366  |
| C | 1.83550  | -2.23935 | 4.15497  |
| C | 1.77103  | -0.94039 | 3.61140  |
| C | -1.42719 | -1.15146 | 1.67384  |
| C | -2.38873 | -2.08890 | 1.38547  |
| C | -2.29537 | -3.40264 | 1.89158  |

---

|    |          |          |          |
|----|----------|----------|----------|
| C  | -1.23753 | -3.74998 | 2.69278  |
| H  | -0.33357 | 3.00044  | -0.86093 |
| H  | 0.40553  | 5.30570  | -0.69279 |
| H  | 2.72488  | 4.52236  | 1.15386  |
| H  | 2.60574  | 5.91491  | 0.07714  |
| H  | 1.18595  | 1.54538  | -2.70817 |
| H  | 3.35332  | 1.58424  | -3.92124 |
| H  | 5.12983  | 3.17053  | -3.25235 |
| H  | 4.76699  | 4.75958  | -1.38066 |
| H  | 0.91944  | -4.16270 | 4.24754  |
| H  | 2.66898  | -2.49627 | 4.80375  |
| Cl | 3.04677  | 0.17087  | 3.99588  |
| H  | -1.52948 | -0.13631 | 1.29235  |
| H  | -3.23370 | -1.80708 | 0.75555  |
| H  | -3.06351 | -4.13494 | 1.65134  |
| H  | -1.15692 | -4.75624 | 3.10249  |
| Au | 0.94272  | -0.39188 | -0.81019 |
| C  | 0.99873  | -1.68810 | -2.40231 |
| C  | 2.00733  | -2.66540 | -2.34537 |
| C  | 0.13156  | -1.63037 | -3.48167 |
| C  | 2.09571  | -3.61353 | -3.36174 |
| C  | 0.23409  | -2.58260 | -4.50071 |
| H  | -0.61982 | -0.84377 | -3.55808 |
| C  | 1.20455  | -3.57489 | -4.43107 |
| H  | 2.86861  | -4.38109 | -3.33151 |
| H  | -0.44438 | -2.54084 | -5.35119 |
| H  | 1.28163  | -4.31733 | -5.22314 |
| C  | 2.64844  | -1.42670 | -0.37041 |
| C  | 3.46559  | -1.10433 | 0.69492  |
| C  | 2.91402  | -2.52217 | -1.21000 |
| C  | 4.56642  | -1.91914 | 0.97397  |
| H  | 3.26611  | -0.23492 | 1.31702  |
| C  | 4.01893  | -3.31949 | -0.91580 |
| C  | 4.83311  | -3.02407 | 0.17463  |
| H  | 5.20799  | -1.67679 | 1.82016  |
| H  | 4.25294  | -4.17687 | -1.54663 |

---

|   |          |          |          |
|---|----------|----------|----------|
| H | 5.68997  | -3.65823 | 0.39376  |
| O | -1.03619 | 0.59481  | -1.32799 |
| C | -3.38006 | 0.35796  | -1.41969 |
| C | -2.06248 | -0.12684 | -1.43770 |
| C | -5.81437 | -0.25151 | -1.59837 |
| C | -4.43915 | -0.52454 | -1.56932 |
| C | -6.39694 | 1.01526  | -1.45837 |
| H | -1.93528 | -1.22172 | -1.55650 |
| H | -4.16358 | -1.57492 | -1.71434 |
| H | -3.52246 | 1.43477  | -1.32154 |
| C | -7.70293 | 1.31673  | -2.13237 |
| H | -5.70681 | 1.86271  | -1.40734 |
| H | -6.48010 | -1.09064 | -1.80455 |
| H | -7.51650 | 1.57272  | -3.18470 |
| H | -8.36930 | 0.44511  | -2.12081 |
| H | -8.22757 | 2.16592  | -1.67785 |
| C | -6.86717 | 1.22872  | 0.56439  |
| C | -7.92181 | 0.32803  | 0.70056  |
| C | -7.41395 | -0.94805 | 1.04777  |
| C | -6.06378 | -0.84312 | 1.25269  |
| C | -5.66763 | 0.58723  | 1.20703  |
| H | -7.01284 | 2.30818  | 0.54904  |
| H | -8.96377 | 0.54645  | 0.47992  |
| H | -8.00057 | -1.85948 | 1.11310  |
| H | -5.39865 | -1.65168 | 1.54512  |
| H | -5.60485 | 0.96177  | 2.24463  |
| H | -4.68988 | 0.78732  | 0.75058  |
| O | 0.03167  | 4.96864  | 1.23766  |
| C | 0.37141  | 4.25001  | 2.39300  |
| H | 1.31135  | 4.61661  | 2.84093  |
| H | -0.42181 | 4.41612  | 3.12999  |

M06/lanl2dz-6-31G(d) Energy = -2646.114809

M06/lanl2dz-6-31G(d) Free Energy = -2645.476917

M06/def2-TZVP Derived free energy = -2646.586709

M06/def2-TZVP Derived free energy in solution (toluene) = -2646.617400



---

M06/def2-TZVP Derived free energy in solution (nitromethane) = -2646.642040

Number of Imaginary Frequencies = 1 (-373.27)

M06/lanl2dz-6-31G(d) Geometry

|   |          |          |          |
|---|----------|----------|----------|
| C | -1.57697 | -1.01121 | -2.98200 |
| C | -2.37232 | -1.97700 | -3.87578 |
| C | -1.33464 | -3.11214 | -1.61220 |
| N | -1.32358 | -1.73808 | -1.70716 |
| C | -1.02644 | -1.22912 | -0.48852 |
| N | -0.85836 | -2.32399 | 0.26961  |
| N | -1.04181 | -3.50454 | -0.40948 |
| C | -3.82250 | -1.83859 | -3.36477 |
| C | -3.85675 | -0.38574 | -2.97186 |
| C | -2.55703 | 0.10744  | -2.81172 |
| C | -2.31536 | 1.45469  | -2.57713 |
| C | -3.40604 | 2.30608  | -2.41184 |
| C | -4.70470 | 1.81024  | -2.51659 |
| C | -4.94049 | 0.46876  | -2.81943 |
| C | -0.56736 | -2.35703 | 1.66462  |
| C | 0.71462  | -1.94136 | 2.11941  |
| C | 0.96645  | -1.94998 | 3.52239  |
| C | -0.04502 | -2.39434 | 4.40641  |
| C | -1.25862 | -2.82356 | 3.94048  |
| C | -1.51990 | -2.80408 | 2.55579  |
| C | 1.75049  | -1.53382 | 1.24405  |
| C | 2.96503  | -1.13242 | 1.74492  |
| C | 3.21081  | -1.12135 | 3.13347  |
| C | 2.22924  | -1.52657 | 4.00132  |
| H | -0.60205 | -0.72391 | -3.39294 |
| H | -2.32460 | -1.58122 | -4.89804 |
| H | -4.01184 | -2.49425 | -2.49894 |
| H | -4.55929 | -2.10585 | -4.13142 |
| H | -1.29615 | 1.84355  | -2.54175 |
| H | -3.23861 | 3.36170  | -2.20480 |
| H | -5.54767 | 2.48640  | -2.38814 |
| H | -5.95879 | 0.10377  | -2.94679 |

---

|    |          |          |          |
|----|----------|----------|----------|
| H  | 0.15923  | -2.39854 | 5.47633  |
| H  | -2.03416 | -3.17494 | 4.61616  |
| Cl | -3.07486 | -3.35384 | 2.01484  |
| H  | 1.58612  | -1.54542 | 0.16769  |
| H  | 3.74320  | -0.81532 | 1.05025  |
| H  | 4.17821  | -0.79655 | 3.51297  |
| H  | 2.40474  | -1.53344 | 5.07650  |
| Au | -0.82377 | 0.86334  | 0.03180  |
| C  | -0.68231 | 2.85821  | 0.51033  |
| C  | -1.68838 | 3.33912  | 1.36762  |
| C  | 0.28630  | 3.71520  | 0.01310  |
| C  | -1.67295 | 4.67724  | 1.75482  |
| C  | 0.28835  | 5.05818  | 0.40222  |
| H  | 1.03923  | 3.36310  | -0.69223 |
| C  | -0.68122 | 5.53069  | 1.27850  |
| H  | -2.44177 | 5.06563  | 2.42272  |
| H  | 1.04803  | 5.73395  | 0.01252  |
| H  | -0.67658 | 6.57552  | 1.58322  |
| C  | -2.52742 | 1.08242  | 1.13416  |
| C  | -3.46620 | 0.07783  | 1.27383  |
| C  | -2.70915 | 2.35266  | 1.70731  |
| C  | -4.60857 | 0.31925  | 2.04249  |
| H  | -3.33242 | -0.89541 | 0.80589  |
| C  | -3.85367 | 2.57075  | 2.47294  |
| C  | -4.79242 | 1.55734  | 2.64513  |
| H  | -5.34707 | -0.47113 | 2.16761  |
| H  | -4.02178 | 3.54563  | 2.93027  |
| H  | -5.68024 | 1.74353  | 3.24638  |
| O  | 1.01334  | 0.74789  | -1.26412 |
| C  | 3.35691  | 0.76144  | -1.49888 |
| C  | 2.15853  | 1.00286  | -0.80847 |
| C  | 5.83169  | 0.96689  | -1.51578 |
| C  | 4.56967  | 1.09744  | -0.92537 |
| C  | 7.01263  | 1.46311  | -0.93828 |
| H  | 2.24876  | 1.44586  | 0.20426  |
| H  | 4.53447  | 1.54998  | 0.07447  |

---

|   |          |          |          |
|---|----------|----------|----------|
| H | 3.30692  | 0.32799  | -2.49840 |
| C | 8.12298  | 1.95248  | -1.82497 |
| H | 6.86903  | 2.04677  | -0.02168 |
| H | 5.88358  | 0.54238  | -2.52148 |
| H | 9.08680  | 2.00463  | -1.30406 |
| H | 8.23792  | 1.30909  | -2.70642 |
| H | 7.88856  | 2.96352  | -2.18477 |
| C | 7.89932  | -0.06824 | 0.08044  |
| C | 8.26869  | -0.94445 | -0.94241 |
| C | 7.18982  | -1.81499 | -1.23183 |
| C | 6.18869  | -1.58973 | -0.32423 |
| C | 6.69288  | -0.68052 | 0.74030  |
| H | 8.63066  | 0.51335  | 0.64121  |
| H | 9.20064  | -0.89811 | -1.50043 |
| H | 7.15238  | -2.51410 | -2.06176 |
| H | 5.22363  | -2.09003 | -0.29612 |
| H | 5.96187  | 0.01756  | 1.16341  |
| H | 7.05615  | -1.30337 | 1.57793  |
| O | -1.81142 | -3.26160 | -3.95605 |
| C | -1.76186 | -3.97575 | -2.75082 |
| H | -2.74006 | -4.42379 | -2.50302 |
| H | -1.05494 | -4.80131 | -2.88933 |

M06/lanl2dz-6-31G(d) Energy = -2646.115389

M06/lanl2dz-6-31G(d) Free Energy = -2645.478944

M06/def2-TZVP Derived free energy = -2646.590418

M06/def2-TZVP Derived free energy in solution (toluene) = -2646.621733

M06/def2-TZVP Derived free energy in solution (nitromethane) = -2646.647298

Number of Imaginary Frequencies = 1 (-375.46)

M06/lanl2dz-6-31G(d) Geometry

|   |         |         |          |
|---|---------|---------|----------|
| C | 1.53866 | 2.98816 | -0.12385 |
| C | 1.41366 | 4.44374 | 0.37697  |
| C | 1.23923 | 2.45176 | 2.30821  |
| N | 1.31948 | 2.06067 | 0.99268  |
| C | 1.12765 | 0.72387 | 0.92766  |

---

|    |          |          |          |
|----|----------|----------|----------|
| N  | 0.94163  | 0.38018  | 2.21314  |
| N  | 1.00302  | 1.43976  | 3.08737  |
| C  | 2.24796  | 5.24418  | -0.61740 |
| C  | 3.30381  | 4.26198  | -1.04470 |
| C  | 2.91497  | 2.95713  | -0.73866 |
| C  | 3.72737  | 1.87507  | -1.04708 |
| C  | 4.95030  | 2.11776  | -1.67005 |
| C  | 5.34037  | 3.41903  | -1.98035 |
| C  | 4.51913  | 4.50088  | -1.66980 |
| C  | 0.69316  | -0.93529 | 2.70097  |
| C  | -0.53868 | -1.56781 | 2.37919  |
| C  | -0.73298 | -2.91739 | 2.79373  |
| C  | 0.28077  | -3.56445 | 3.53959  |
| C  | 1.44289  | -2.92008 | 3.86938  |
| C  | 1.65130  | -1.59358 | 3.44055  |
| C  | -1.57291 | -0.91944 | 1.66115  |
| C  | -2.72479 | -1.59493 | 1.34007  |
| C  | -2.91264 | -2.93681 | 1.73189  |
| C  | -1.93668 | -3.57852 | 2.45099  |
| H  | 0.75267  | 2.77177  | -0.86466 |
| H  | 0.36058  | 4.76924  | 0.44708  |
| H  | 2.64314  | 6.14947  | -0.14045 |
| H  | 1.62618  | 5.56228  | -1.46779 |
| H  | 3.43221  | 0.85324  | -0.80405 |
| H  | 5.60427  | 1.28301  | -1.91388 |
| H  | 6.30014  | 3.59211  | -2.46356 |
| H  | 4.83135  | 5.51767  | -1.90472 |
| H  | 0.12281  | -4.59525 | 3.85425  |
| H  | 2.22176  | -3.41395 | 4.44475  |
| Cl | 3.16071  | -0.83346 | 3.82829  |
| H  | -1.45270 | 0.12182  | 1.36535  |
| H  | -3.49871 | -1.08014 | 0.77015  |
| H  | -3.83123 | -3.45755 | 1.46764  |
| H  | -2.06989 | -4.61154 | 2.77036  |
| Au | 0.83517  | -0.44805 | -0.88520 |
| C  | 0.52121  | -1.56716 | -2.57770 |

---

|   |          |          |          |
|---|----------|----------|----------|
| C | 1.29317  | -2.73868 | -2.66682 |
| C | -0.37160 | -1.23265 | -3.58302 |
| C | 1.11713  | -3.59043 | -3.75466 |
| C | -0.53431 | -2.09107 | -4.67465 |
| H | -0.93461 | -0.30043 | -3.54875 |
| C | 0.19925  | -3.26871 | -4.75095 |
| H | 1.70377  | -4.50507 | -3.83706 |
| H | -1.23159 | -1.82955 | -5.46888 |
| H | 0.06904  | -3.93710 | -5.59987 |
| C | 2.28960  | -1.86236 | -0.64325 |
| C | 3.20911  | -1.83190 | 0.38822  |
| C | 2.26692  | -2.90053 | -1.59064 |
| C | 4.12034  | -2.88439 | 0.51429  |
| H | 3.24401  | -1.00583 | 1.09584  |
| C | 3.18549  | -3.93899 | -1.44648 |
| C | 4.10028  | -3.93332 | -0.39664 |
| H | 4.84260  | -2.86959 | 1.32919  |
| H | 3.19550  | -4.75782 | -2.16549 |
| H | 4.81081  | -4.75169 | -0.29793 |
| O | -0.86821 | 0.99962  | -1.17993 |
| C | -3.20052 | 1.34841  | -1.13874 |
| C | -2.04627 | 0.56505  | -1.28433 |
| C | -5.68462 | 1.42553  | -1.20419 |
| C | -4.45039 | 0.77203  | -1.28521 |
| C | -6.91123 | 0.80160  | -1.48696 |
| H | -2.20095 | -0.51131 | -1.49918 |
| H | -4.47341 | -0.29836 | -1.52864 |
| H | -3.09213 | 2.41209  | -0.92372 |
| C | -8.04098 | 1.60705  | -2.06302 |
| H | -6.83303 | -0.21996 | -1.87624 |
| H | -5.68368 | 2.49720  | -0.99019 |
| H | -9.01454 | 1.11800  | -1.93686 |
| H | -8.09125 | 2.60379  | -1.60664 |
| H | -7.88098 | 1.74706  | -3.14079 |
| C | -7.69533 | 0.14436  | 0.29048  |
| C | -7.96351 | 1.33792  | 0.96320  |

---

|   |          |          |          |
|---|----------|----------|----------|
| C | -6.80651 | 1.75501  | 1.66571  |
| C | -5.84833 | 0.78296  | 1.54937  |
| C | -6.45396 | -0.42356 | 0.92426  |
| H | -8.48518 | -0.49230 | -0.10719 |
| H | -8.88391 | 1.91056  | 0.87934  |
| H | -6.68982 | 2.70817  | 2.17262  |
| H | -4.84122 | 0.82142  | 1.95768  |
| H | -5.79825 | -1.01041 | 0.27173  |
| H | -6.77857 | -1.10129 | 1.73470  |
| C | 1.36511  | 3.89477  | 2.66068  |
| H | 0.35784  | 4.32060  | 2.82848  |
| H | 1.93804  | 4.01523  | 3.58576  |
| O | 2.03753  | 4.57763  | 1.64054  |

M06/lanl2dz-6-31G(d) Energy = -2646.113570

M06/lanl2dz-6-31G(d) Free Energy = -2645.476042

M06/def2-TZVP Derived free energy = -2646.587495

M06/def2-TZVP Derived free energy in solution (toluene) = -2646.618806

M06/def2-TZVP Derived free energy in solution (nitromethane) = -2646.644433

Number of Imaginary Frequencies = 1 (-385.67)

M06/lanl2dz-6-31G(d) Geometry

|   |          |         |          |
|---|----------|---------|----------|
| C | -0.97985 | 3.07086 | 0.08292  |
| C | -0.58184 | 4.48297 | -0.40071 |
| C | -0.53974 | 2.46749 | -2.31169 |
| N | -0.80615 | 2.10797 | -1.01182 |
| C | -0.83208 | 0.75840 | -0.93425 |
| N | -0.58189 | 0.37606 | -2.19854 |
| N | -0.39109 | 1.42312 | -3.06895 |
| C | -1.36651 | 5.41765 | 0.51344  |
| C | -2.59854 | 4.61908 | 0.83956  |
| C | -2.39436 | 3.26514 | 0.56863  |
| C | -3.39560 | 2.33017 | 0.79244  |
| C | -4.61876 | 2.77196 | 1.29333  |
| C | -4.82508 | 4.12242 | 1.56730  |
| C | -3.81518 | 5.05593 | 1.34294  |

---

|    |          |          |          |
|----|----------|----------|----------|
| C  | -0.50714 | -0.96619 | -2.67009 |
| C  | 0.54608  | -1.80204 | -2.20760 |
| C  | 0.54410  | -3.17117 | -2.60250 |
| C  | -0.46713 | -3.63800 | -3.47576 |
| C  | -1.44430 | -2.80102 | -3.94378 |
| C  | -1.46744 | -1.45409 | -3.52942 |
| C  | 1.58576  | -1.33690 | -1.36551 |
| C  | 2.54597  | -2.20302 | -0.90276 |
| C  | 2.53271  | -3.56440 | -1.27227 |
| C  | 1.55601  | -4.03220 | -2.11423 |
| H  | -0.30989 | 2.73933  | 0.89163  |
| H  | 0.51149  | 4.63773  | -0.37413 |
| H  | -1.57016 | 6.36625  | 0.00156  |
| H  | -0.78252 | 5.64805  | 1.41717  |
| H  | -3.24717 | 1.27172  | 0.57438  |
| H  | -5.41829 | 2.05463  | 1.46694  |
| H  | -5.78728 | 4.45321  | 1.95365  |
| H  | -3.98398 | 6.11247  | 1.54752  |
| H  | -0.45759 | -4.68474 | -3.77681 |
| H  | -2.21921 | -3.15560 | -4.61869 |
| Cl | -2.76729 | -0.44967 | -4.08598 |
| H  | 1.62183  | -0.28457 | -1.08688 |
| H  | 3.32494  | -1.82632 | -0.23825 |
| H  | 3.29735  | -4.23921 | -0.89238 |
| H  | 1.53941  | -5.07801 | -2.41891 |
| Au | -0.91986 | -0.42600 | 0.89185  |
| C  | -0.99626 | -1.55242 | 2.60814  |
| C  | -1.96158 | -2.57498 | 2.60414  |
| C  | -0.18687 | -1.34996 | 3.71429  |
| C  | -2.06717 | -3.41729 | 3.70813  |
| C  | -0.30683 | -2.19745 | 4.82016  |
| H  | 0.52634  | -0.52654 | 3.74767  |
| C  | -1.23555 | -3.23095 | 4.80919  |
| H  | -2.80732 | -4.21704 | 3.72191  |
| H  | 0.32449  | -2.03926 | 5.69286  |
| H  | -1.32480 | -3.89047 | 5.67023  |

---

|   |          |          |          |
|---|----------|----------|----------|
| C | -2.54739 | -1.58754 | 0.47463  |
| C | -3.31199 | -1.43126 | -0.66604 |
| C | -2.80996 | -2.59702 | 1.41577  |
| C | -4.35708 | -2.32737 | -0.90833 |
| H | -3.12116 | -0.62713 | -1.37373 |
| C | -3.85808 | -3.47836 | 1.15474  |
| C | -4.62042 | -3.34799 | -0.00310 |
| H | -4.95852 | -2.21427 | -1.80917 |
| H | -4.08724 | -4.27172 | 1.86555  |
| H | -5.43315 | -4.04652 | -0.19237 |
| O | 0.97072  | 0.72748  | 1.35415  |
| C | 3.32321  | 0.66898  | 1.46165  |
| C | 2.04199  | 0.11033  | 1.59392  |
| C | 5.79583  | 0.28361  | 1.69549  |
| C | 4.44521  | -0.08793 | 1.76442  |
| C | 6.26978  | 1.53297  | 1.27330  |
| H | 1.98936  | -0.94569 | 1.92645  |
| H | 4.25033  | -1.10195 | 2.13044  |
| H | 3.39011  | 1.71013  | 1.14312  |
| C | 7.55421  | 2.07675  | 1.82543  |
| H | 5.50911  | 2.29184  | 1.06662  |
| H | 6.52880  | -0.44031 | 2.05381  |
| H | 7.36264  | 2.53300  | 2.80672  |
| H | 8.29604  | 1.28222  | 1.97410  |
| H | 7.99388  | 2.85169  | 1.18579  |
| C | 6.68995  | 1.35068  | -0.76696 |
| C | 7.82472  | 0.54246  | -0.74283 |
| C | 7.43900  | -0.81957 | -0.79712 |
| C | 6.08318  | -0.88564 | -0.97750 |
| C | 5.55018  | 0.47951  | -1.21944 |
| H | 6.73212  | 2.41726  | -0.98461 |
| H | 8.84331  | 0.89785  | -0.60832 |
| H | 8.11095  | -1.66572 | -0.69008 |
| H | 5.49461  | -1.79501 | -1.06965 |
| H | 5.43642  | 0.61682  | -2.30996 |
| H | 4.56450  | 0.68087  | -0.78150 |



---

|   |          |         |          |
|---|----------|---------|----------|
| C | -0.41016 | 3.90790 | -2.67213 |
| H | 0.66111  | 4.17363 | -2.74853 |
| H | -0.87374 | 4.10170 | -3.64501 |
| O | -1.05953 | 4.69693 | -1.71646 |

Top, towards, 2, endo, away

M06/lanl2dz-6-31G(d) Energy = -2646.115474

M06/lanl2dz-6-31G(d) Free Energy = -2645.475815

M06/def2-TZVP Derived free energy = -2646.586197

M06/def2-TZVP Derived free energy in solution (toluene) = -2646.617317

M06/def2-TZVP Derived free energy in solution (nitromethane) = -2646.642539

Number of Imaginary Frequencies = 1 (-376.41)

M06/lanl2dz-6-31G(d) Geometry

|   |          |          |          |
|---|----------|----------|----------|
| C | 1.49624  | 2.11294  | -0.78507 |
| C | 2.22552  | 3.27192  | -1.49656 |
| C | -0.53453 | 3.44948  | -1.38551 |
| N | 0.04921  | 2.31870  | -0.86044 |
| C | -0.92529 | 1.43319  | -0.55157 |
| N | -2.04642 | 2.07810  | -0.92400 |
| N | -1.82595 | 3.32846  | -1.44314 |
| C | 3.59172  | 3.31184  | -0.81953 |
| C | 3.30159  | 2.81872  | 0.57157  |
| C | 2.09067  | 2.12182  | 0.59895  |
| C | 1.62236  | 1.54314  | 1.77107  |
| C | 2.37744  | 1.69048  | 2.93510  |
| C | 3.57737  | 2.39973  | 2.91534  |
| C | 4.05072  | 2.96464  | 1.73088  |
| C | -3.36100 | 1.53377  | -0.82503 |
| C | -3.65291 | 0.33821  | -1.54061 |
| C | -4.86705 | -0.34189 | -1.23464 |
| C | -5.77550 | 0.23975  | -0.31814 |
| C | -5.50638 | 1.43505  | 0.29246  |
| C | -4.27457 | 2.07549  | 0.05199  |
| C | -2.77508 | -0.23096 | -2.49916 |

---

|    |          |          |          |
|----|----------|----------|----------|
| C  | -3.06435 | -1.44350 | -3.07666 |
| C  | -4.24200 | -2.14117 | -2.73581 |
| C  | -5.12886 | -1.59148 | -1.84523 |
| H  | 1.69040  | 1.16392  | -1.30379 |
| H  | 2.27512  | 3.11820  | -2.58909 |
| H  | 4.01504  | 4.32258  | -0.86523 |
| H  | 4.28552  | 2.63363  | -1.34249 |
| H  | 0.67527  | 1.00076  | 1.79717  |
| H  | 2.01744  | 1.26110  | 3.86801  |
| H  | 4.14616  | 2.52120  | 3.83543  |
| H  | 4.98311  | 3.52919  | 1.72289  |
| H  | -6.70494 | -0.28469 | -0.09958 |
| H  | -6.20434 | 1.88419  | 0.99449  |
| Cl | -3.90795 | 3.50767  | 0.96147  |
| H  | -1.87126 | 0.30163  | -2.79294 |
| H  | -2.37790 | -1.86593 | -3.80809 |
| H  | -4.45039 | -3.10579 | -3.19332 |
| H  | -6.05388 | -2.10855 | -1.59184 |
| Au | -0.91418 | -0.69926 | -0.02768 |
| C  | -1.27647 | -2.70943 | 0.18009  |
| C  | -2.25840 | -3.04407 | 1.12833  |
| C  | -0.74392 | -3.67197 | -0.66182 |
| C  | -2.66882 | -4.37087 | 1.24086  |
| C  | -1.16376 | -4.99977 | -0.53865 |
| H  | -0.02345 | -3.40625 | -1.43537 |
| C  | -2.11668 | -5.34444 | 0.41310  |
| H  | -3.42965 | -4.65093 | 1.96936  |
| H  | -0.74791 | -5.76116 | -1.19657 |
| H  | -2.44277 | -6.37866 | 0.50575  |
| C  | -2.22722 | -0.66212 | 1.54073  |
| C  | -2.54683 | 0.49533  | 2.22515  |
| C  | -2.76197 | -1.91148 | 1.89870  |
| C  | -3.46941 | 0.42742  | 3.27371  |
| H  | -2.09856 | 1.45281  | 1.96301  |
| C  | -3.68952 | -1.95385 | 2.93838  |
| C  | -4.04665 | -0.78978 | 3.61395  |

---

|   |          |          |          |
|---|----------|----------|----------|
| H | -3.73583 | 1.33747  | 3.80924  |
| H | -4.12848 | -2.90639 | 3.23456  |
| H | -4.77084 | -0.83974 | 4.42482  |
| O | 0.81197  | -0.85277 | -1.48584 |
| C | 3.15208  | -1.16078 | -1.47190 |
| C | 1.84401  | -1.44746 | -1.06425 |
| C | 5.56761  | -1.67925 | -1.25332 |
| C | 4.21798  | -1.87758 | -0.95231 |
| C | 6.61024  | -2.50140 | -0.79778 |
| H | 1.72267  | -2.24894 | -0.30724 |
| H | 3.97309  | -2.69506 | -0.26361 |
| H | 3.31874  | -0.37256 | -2.20936 |
| C | 7.86779  | -2.62294 | -1.60978 |
| H | 6.29721  | -3.42196 | -0.29333 |
| H | 5.81919  | -0.85789 | -1.93011 |
| H | 7.70723  | -3.32916 | -2.43580 |
| H | 8.15034  | -1.65885 | -2.05140 |
| H | 8.71455  | -2.99598 | -1.02134 |
| C | 7.30146  | -1.70808 | 0.97212  |
| C | 7.79223  | -0.46057 | 0.58457  |
| C | 6.74192  | 0.48923  | 0.61190  |
| C | 5.61910  | -0.10962 | 1.12162  |
| C | 5.98410  | -1.44940 | 1.65116  |
| H | 7.95471  | -2.52926 | 1.26546  |
| H | 8.79958  | -0.27033 | 0.22201  |
| H | 6.81044  | 1.51079  | 0.24822  |
| H | 4.63980  | 0.34980  | 1.23663  |
| H | 6.18667  | -1.34197 | 2.73199  |
| H | 5.21887  | -2.22636 | 1.55791  |
| C | 0.31861  | 4.59097  | -1.82380 |
| H | 0.40690  | 4.59167  | -2.92568 |
| H | -0.13062 | 5.54247  | -1.52181 |
| O | 1.58034  | 4.49696  | -1.21687 |

M06/lanl2dz-6-31G(d) Energy = -2646.115527

M06/lanl2dz-6-31G(d) Free Energy = -2645.475340

---

M06/def2-TZVP Derived free energy = -2646.585709

M06/def2-TZVP Derived free energy in solution (toluene) = -2646.616976

M06/def2-TZVP Derived free energy in solution (nitromethane) = -2646.642293

Number of Imaginary Frequencies = 1 (-374.05)

M06/lanl2dz-6-31G(d) Geometry

|   |          |          |          |
|---|----------|----------|----------|
| C | 1.55208  | 2.04893  | -0.76134 |
| C | 2.31921  | 3.18271  | -1.47420 |
| C | -0.44097 | 3.41530  | -1.41816 |
| N | 0.11127  | 2.28129  | -0.86675 |
| C | -0.88580 | 1.42114  | -0.55814 |
| N | -1.98761 | 2.08352  | -0.95618 |
| N | -1.73386 | 3.32062  | -1.49175 |
| C | 3.67016  | 3.20993  | -0.76524 |
| C | 3.33805  | 2.74670  | 0.62681  |
| C | 2.11745  | 2.06673  | 0.63466  |
| C | 1.61267  | 1.51131  | 1.80286  |
| C | 2.34152  | 1.66421  | 2.98261  |
| C | 3.55060  | 2.35805  | 2.98245  |
| C | 4.05991  | 2.90040  | 1.80246  |
| C | -3.31491 | 1.56918  | -0.86309 |
| C | -3.62684 | 0.37115  | -1.56592 |
| C | -4.85944 | -0.27680 | -1.26445 |
| C | -5.76373 | 0.33722  | -0.36495 |
| C | -5.47324 | 1.53390  | 0.23299  |
| C | -4.22473 | 2.14280  | -0.00263 |
| C | -2.75283 | -0.22980 | -2.50833 |
| C | -3.06450 | -1.44237 | -3.07393 |
| C | -4.26170 | -2.10822 | -2.73744 |
| C | -5.14445 | -1.52735 | -1.86265 |
| H | 1.73764  | 1.08995  | -1.26343 |
| H | 2.39150  | 3.00944  | -2.56262 |
| H | 4.11315  | 4.21186  | -0.81906 |
| H | 4.36394  | 2.50931  | -1.25910 |
| H | 0.65750  | 0.98301  | 1.81245  |
| H | 1.95418  | 1.25179  | 3.91222  |

---

|    |          |          |          |
|----|----------|----------|----------|
| H  | 4.09804  | 2.48562  | 3.91456  |
| H  | 4.99965  | 3.45263  | 1.80990  |
| H  | -6.70761 | -0.16257 | -0.15053 |
| H  | -6.16770 | 2.00823  | 0.92168  |
| Cl | -3.83617 | 3.57851  | 0.89209  |
| H  | -1.83399 | 0.27762  | -2.79961 |
| H  | -2.38030 | -1.88976 | -3.79251 |
| H  | -4.48800 | -3.07306 | -3.18586 |
| H  | -6.08425 | -2.01899 | -1.61316 |
| Au | -0.92891 | -0.70592 | -0.01381 |
| C  | -1.32938 | -2.70646 | 0.20845  |
| C  | -2.32466 | -3.01549 | 1.15111  |
| C  | -0.80447 | -3.68524 | -0.61927 |
| C  | -2.75776 | -4.33429 | 1.27223  |
| C  | -1.24692 | -5.00479 | -0.48744 |
| H  | -0.07273 | -3.43803 | -1.38835 |
| C  | -2.21402 | -5.32454 | 0.45866  |
| H  | -3.52952 | -4.59497 | 1.99638  |
| H  | -0.83731 | -5.77936 | -1.13376 |
| H  | -2.55799 | -6.35233 | 0.55827  |
| C  | -2.25563 | -0.63023 | 1.54197  |
| C  | -2.56480 | 0.53905  | 2.21102  |
| C  | -2.81615 | -1.86682 | 1.90547  |
| C  | -3.50062 | 0.49670  | 3.24931  |
| H  | -2.09979 | 1.48711  | 1.94377  |
| C  | -3.75682 | -1.88355 | 2.93405  |
| C  | -4.10211 | -0.70725 | 3.59445  |
| H  | -3.75800 | 1.41620  | 3.77306  |
| H  | -4.21595 | -2.82568 | 3.23302  |
| H  | -4.83642 | -0.73719 | 4.39715  |
| O  | 0.78977  | -0.90659 | -1.47099 |
| C  | 3.12691  | -1.21775 | -1.46824 |
| C  | 1.82214  | -1.50089 | -1.04924 |
| C  | 5.54575  | -1.70572 | -1.26236 |
| C  | 4.20213  | -1.92077 | -0.94793 |
| C  | 6.61136  | -2.50101 | -0.81225 |

---

|   |         |          |          |
|---|---------|----------|----------|
| H | 1.70387 | -2.29549 | -0.28438 |
| H | 3.97098 | -2.73400 | -0.24965 |
| H | 3.28534 | -0.43679 | -2.21547 |
| C | 7.86173 | -2.59777 | -1.63902 |
| H | 6.32633 | -3.42574 | -0.29890 |
| H | 5.77599 | -0.88337 | -1.94603 |
| H | 7.70936 | -3.31500 | -2.45703 |
| H | 8.11345 | -1.63039 | -2.09199 |
| H | 8.72509 | -2.94362 | -1.05820 |
| C | 7.30563 | -1.67867 | 0.93848  |
| C | 7.73904 | -0.41119 | 0.54483  |
| C | 6.65241 | 0.49545  | 0.59507  |
| C | 5.56558 | -0.14790 | 1.12825  |
| C | 5.99302 | -1.47352 | 1.64476  |
| H | 7.99719 | -2.47251 | 1.21897  |
| H | 8.73082 | -0.18059 | 0.16325  |
| H | 6.66853 | 1.51961  | 0.23126  |
| H | 4.57179 | 0.27284  | 1.26509  |
| H | 6.21227 | -1.36238 | 2.72196  |
| H | 5.25608 | -2.27879 | 1.56358  |
| C | 0.44360 | 4.52944  | -1.86461 |
| H | 0.55386 | 4.50231  | -2.96425 |
| H | 0.00798 | 5.49648  | -1.59393 |
| O | 1.69126 | 4.42407  | -1.23065 |

M06/lanl2dz-6-31G(d) Energy = -2646.112370

M06/lanl2dz-6-31G(d) Free Energy = -2645.475786

M06/def2-TZVP Derived free energy = -2646.586019

M06/def2-TZVP Derived free energy in solution (toluene) = -2646.616686

M06/def2-TZVP Derived free energy in solution (nitromethane) = -2646.641435

Number of Imaginary Frequencies = 1 (-383.40)

M06/lanl2dz-6-31G(d) Geometry

|   |          |         |          |
|---|----------|---------|----------|
| C | 0.36909  | 2.89240 | -0.16883 |
| C | 0.25437  | 4.40368 | -0.44399 |
| C | -1.20008 | 2.82881 | -2.14604 |

---

|    |          |          |          |
|----|----------|----------|----------|
| N  | -0.62301 | 2.22628  | -1.04851 |
| C  | -1.13901 | 0.98233  | -0.92799 |
| N  | -2.00010 | 0.90267  | -1.95222 |
| N  | -2.05130 | 2.03703  | -2.72407 |
| C  | -0.92955 | 4.85784  | 0.43399  |
| C  | -0.81738 | 3.92059  | 1.60455  |
| C  | -0.02539 | 2.81495  | 1.27602  |
| C  | 0.28805  | 1.84870  | 2.22229  |
| C  | -0.26064 | 1.95716  | 3.49783  |
| C  | -1.08185 | 3.03685  | 3.81771  |
| C  | -1.35123 | 4.03492  | 2.88152  |
| C  | -2.89842 | -0.17630 | -2.20936 |
| C  | -2.38770 | -1.43237 | -2.63603 |
| C  | -3.31208 | -2.50233 | -2.82212 |
| C  | -4.69300 | -2.27036 | -2.61880 |
| C  | -5.15986 | -1.04634 | -2.21958 |
| C  | -4.24860 | 0.00444  | -1.99855 |
| C  | -1.01003 | -1.67155 | -2.85968 |
| C  | -0.57103 | -2.92502 | -3.20916 |
| C  | -1.48170 | -3.98879 | -3.38106 |
| C  | -2.82467 | -3.77535 | -3.20105 |
| H  | 1.35722  | 2.47996  | -0.41134 |
| H  | 1.17083  | 4.87122  | -0.06186 |
| H  | -1.89288 | 4.72847  | -0.08519 |
| H  | -0.85887 | 5.91773  | 0.70588  |
| H  | 0.94650  | 1.01485  | 1.97423  |
| H  | -0.05145 | 1.19312  | 4.24450  |
| H  | -1.50669 | 3.11031  | 4.81702  |
| H  | -1.96505 | 4.89319  | 3.15197  |
| H  | -5.39098 | -3.09159 | -2.77715 |
| H  | -6.21898 | -0.86825 | -2.05209 |
| Cl | -4.87181 | 1.51751  | -1.41123 |
| H  | -0.28951 | -0.86521 | -2.74554 |
| H  | 0.49317  | -3.09373 | -3.36538 |
| H  | -1.11689 | -4.97374 | -3.66435 |
| H  | -3.54141 | -4.58396 | -3.34060 |

---

|    |          |          |          |
|----|----------|----------|----------|
| Au | -0.62567 | -0.67023 | 0.36701  |
| C  | -0.26542 | -2.32925 | 1.51964  |
| C  | -1.13200 | -2.49182 | 2.61534  |
| C  | 0.70798  | -3.27670 | 1.24401  |
| C  | -0.97042 | -3.59131 | 3.45546  |
| C  | 0.85730  | -4.37959 | 2.09016  |
| H  | 1.34255  | -3.18632 | 0.36210  |
| C  | 0.02759  | -4.52683 | 3.19551  |
| H  | -1.63215 | -3.73308 | 4.30962  |
| H  | 1.61919  | -5.12767 | 1.87687  |
| H  | 0.14566  | -5.38527 | 3.85405  |
| C  | -2.17055 | -0.50763 | 1.69367  |
| C  | -3.07635 | 0.53599  | 1.66332  |
| C  | -2.16444 | -1.46371 | 2.72388  |
| C  | -4.02816 | 0.63164  | 2.68170  |
| H  | -3.04659 | 1.29347  | 0.88111  |
| C  | -3.12010 | -1.34432 | 3.73218  |
| C  | -4.04607 | -0.30492 | 3.70840  |
| H  | -4.74787 | 1.44836  | 2.66587  |
| H  | -3.14222 | -2.06775 | 4.54708  |
| H  | -4.78700 | -0.22598 | 4.50172  |
| O  | 1.29079  | -0.74444 | -0.83966 |
| C  | 3.64200  | -0.82449 | -0.97281 |
| C  | 2.41733  | -0.82782 | -0.28695 |
| C  | 6.10773  | -1.07868 | -0.83717 |
| C  | 4.82805  | -0.97537 | -0.27865 |
| C  | 7.25841  | -1.38449 | -0.09319 |
| H  | 2.47163  | -0.92615 | 0.81763  |
| H  | 4.75396  | -1.07455 | 0.81173  |
| H  | 3.63165  | -0.74454 | -2.06034 |
| C  | 8.37844  | -2.15212 | -0.73606 |
| H  | 7.07971  | -1.63074 | 0.95966  |
| H  | 6.19590  | -1.01002 | -1.92436 |
| H  | 8.13097  | -3.22234 | -0.75057 |
| H  | 8.52997  | -1.83637 | -1.77608 |
| H  | 9.32808  | -2.04237 | -0.19840 |



---

|   |          |         |          |
|---|----------|---------|----------|
| C | 8.16441  | 0.38990 | 0.40285  |
| C | 8.57202  | 0.87954 | -0.83888 |
| C | 7.51468  | 1.61626 | -1.42655 |
| C | 6.48817  | 1.70479 | -0.52411 |
| C | 6.95167  | 1.19060 | 0.79282  |
| H | 8.87002  | 0.00984 | 1.14117  |
| H | 9.51597  | 0.64564 | -1.32506 |
| H | 7.50795  | 2.00387 | -2.44083 |
| H | 5.52665  | 2.18309 | -0.68966 |
| H | 7.30513  | 2.04994 | 1.39081  |
| H | 6.19770  | 0.67815 | 1.39885  |
| C | -0.89664 | 4.24243 | -2.51053 |
| H | -0.66759 | 4.31816 | -3.57918 |
| H | -1.79027 | 4.86283 | -2.32534 |
| O | 0.22242  | 4.72168 | -1.81057 |

M06/lanl2dz-6-31G(d) Energy = -2646.115474

M06/lanl2dz-6-31G(d) Free Energy = -2645.475815

M06/def2-TZVP Derived free energy = -2646.586197

M06/def2-TZVP Derived free energy in solution (toluene) = -2646.617317

M06/def2-TZVP Derived free energy in solution (nitromethane) = -2646.642539

Number of Imaginary Frequencies = 1 (-376.41)

M06/lanl2dz-6-31G(d) Geometry

|   |          |         |          |
|---|----------|---------|----------|
| C | 1.49623  | 2.11295 | -0.78506 |
| C | 2.22550  | 3.27193 | -1.49654 |
| C | -0.53455 | 3.44950 | -1.38548 |
| N | 0.04919  | 2.31871 | -0.86043 |
| C | -0.92530 | 1.43319 | -0.55158 |
| N | -2.04643 | 2.07810 | -0.92401 |
| N | -1.82596 | 3.32847 | -1.44313 |
| C | 3.59171  | 3.31185 | -0.81953 |
| C | 3.30158  | 2.81872 | 0.57157  |
| C | 2.09066  | 2.12182 | 0.59895  |
| C | 1.62236  | 1.54313 | 1.77107  |
| C | 2.37744  | 1.69047 | 2.93510  |

---

|    |          |          |          |
|----|----------|----------|----------|
| C  | 3.57737  | 2.39971  | 2.91534  |
| C  | 4.05071  | 2.96463  | 1.73088  |
| C  | -3.36102 | 1.53376  | -0.82504 |
| C  | -3.65290 | 0.33820  | -1.54062 |
| C  | -4.86704 | -0.34192 | -1.23466 |
| C  | -5.77550 | 0.23972  | -0.31816 |
| C  | -5.50640 | 1.43502  | 0.29243  |
| C  | -4.27460 | 2.07547  | 0.05197  |
| C  | -2.77507 | -0.23097 | -2.49916 |
| C  | -3.06432 | -1.44351 | -3.07667 |
| C  | -4.24197 | -2.14119 | -2.73583 |
| C  | -5.12884 | -1.59151 | -1.84525 |
| H  | 1.69038  | 1.16393  | -1.30380 |
| H  | 2.27509  | 3.11823  | -2.58908 |
| H  | 4.01503  | 4.32258  | -0.86523 |
| H  | 4.28550  | 2.63363  | -1.34250 |
| H  | 0.67526  | 1.00075  | 1.79717  |
| H  | 2.01744  | 1.26108  | 3.86801  |
| H  | 4.14617  | 2.52118  | 3.83542  |
| H  | 4.98310  | 3.52918  | 1.72289  |
| H  | -6.70493 | -0.28473 | -0.09960 |
| H  | -6.20437 | 1.88416  | 0.99446  |
| Cl | -3.90799 | 3.50766  | 0.96145  |
| H  | -1.87125 | 0.30163  | -2.79295 |
| H  | -2.37787 | -1.86593 | -3.80810 |
| H  | -4.45035 | -3.10581 | -3.19333 |
| H  | -6.05385 | -2.10859 | -1.59186 |
| Au | -0.91418 | -0.69926 | -0.02768 |
| C  | -1.27646 | -2.70943 | 0.18010  |
| C  | -2.25839 | -3.04407 | 1.12834  |
| C  | -0.74391 | -3.67197 | -0.66180 |
| C  | -2.66879 | -4.37087 | 1.24088  |
| C  | -1.16373 | -4.99977 | -0.53863 |
| H  | -0.02344 | -3.40625 | -1.43536 |
| C  | -2.11666 | -5.34444 | 0.41312  |
| H  | -3.42962 | -4.65093 | 1.96938  |

---

|   |          |          |          |
|---|----------|----------|----------|
| H | -0.74787 | -5.76117 | -1.19654 |
| H | -2.44273 | -6.37867 | 0.50578  |
| C | -2.22722 | -0.66211 | 1.54072  |
| C | -2.54684 | 0.49533  | 2.22514  |
| C | -2.76197 | -1.91148 | 1.89870  |
| C | -3.46942 | 0.42742  | 3.27371  |
| H | -2.09857 | 1.45282  | 1.96299  |
| C | -3.68952 | -1.95385 | 2.93838  |
| C | -4.04666 | -0.78978 | 3.61395  |
| H | -3.73584 | 1.33747  | 3.80923  |
| H | -4.12847 | -2.90639 | 3.23456  |
| H | -4.77084 | -0.83974 | 4.42482  |
| O | 0.81198  | -0.85276 | -1.48583 |
| C | 3.15209  | -1.16077 | -1.47189 |
| C | 1.84402  | -1.44745 | -1.06424 |
| C | 5.56762  | -1.67924 | -1.25332 |
| C | 4.21799  | -1.87757 | -0.95232 |
| C | 6.61025  | -2.50138 | -0.79780 |
| H | 1.72268  | -2.24894 | -0.30723 |
| H | 3.97311  | -2.69506 | -0.26362 |
| H | 3.31875  | -0.37254 | -2.20935 |
| C | 7.86780  | -2.62291 | -1.60980 |
| H | 6.29724  | -3.42194 | -0.29335 |
| H | 5.81919  | -0.85786 | -1.93011 |
| H | 7.70724  | -3.32913 | -2.43582 |
| H | 8.15034  | -1.65881 | -2.05143 |
| H | 8.71457  | -2.99594 | -1.02137 |
| C | 7.30148  | -1.70806 | 0.97211  |
| C | 7.79224  | -0.46056 | 0.58456  |
| C | 6.74192  | 0.48924  | 0.61190  |
| C | 5.61911  | -0.10962 | 1.12161  |
| C | 5.98412  | -1.44940 | 1.65115  |
| H | 7.95473  | -2.52924 | 1.26544  |
| H | 8.79959  | -0.27030 | 0.22200  |
| H | 6.81044  | 1.51080  | 0.24822  |
| H | 4.63980  | 0.34979  | 1.23663  |

---

|   |          |          |          |
|---|----------|----------|----------|
| H | 6.18669  | -1.34197 | 2.73198  |
| H | 5.21890  | -2.22637 | 1.55791  |
| O | 1.58032  | 4.49697  | -1.21684 |
| C | 0.31859  | 4.59100  | -1.82374 |
| H | 0.40686  | 4.59173  | -2.92563 |
| H | -0.13064 | 5.54248  | -1.52172 |

M06/lanl2dz-6-31G(d) Energy = -2646.115527

M06/lanl2dz-6-31G(d) Free Energy = -2645.475340

M06/def2-TZVP Derived free energy = -2646.585709

M06/def2-TZVP Derived free energy in solution (toluene) = -2646.616976

M06/def2-TZVP Derived free energy in solution (nitromethane) = -2646.642293

Number of Imaginary Frequencies = 1 (-374.05)

M06/lanl2dz-6-31G(d) Geometry

|   |          |          |          |
|---|----------|----------|----------|
| C | 1.55209  | 2.04893  | -0.76133 |
| C | 2.31921  | 3.18271  | -1.47421 |
| C | -0.44097 | 3.41530  | -1.41816 |
| N | 0.11127  | 2.28129  | -0.86675 |
| C | -0.88579 | 1.42114  | -0.55814 |
| N | -1.98760 | 2.08352  | -0.95618 |
| N | -1.73386 | 3.32062  | -1.49175 |
| C | 3.67017  | 3.20992  | -0.76524 |
| C | 3.33806  | 2.74670  | 0.62681  |
| C | 2.11746  | 2.06673  | 0.63467  |
| C | 1.61267  | 1.51132  | 1.80286  |
| C | 2.34153  | 1.66422  | 2.98261  |
| C | 3.55060  | 2.35806  | 2.98244  |
| C | 4.05991  | 2.90040  | 1.80246  |
| C | -3.31490 | 1.56919  | -0.86309 |
| C | -3.62684 | 0.37115  | -1.56592 |
| C | -4.85944 | -0.27680 | -1.26445 |
| C | -5.76373 | 0.33723  | -0.36495 |
| C | -5.47323 | 1.53390  | 0.23300  |
| C | -4.22473 | 2.14280  | -0.00262 |
| C | -2.75283 | -0.22980 | -2.50833 |

---

|    |          |          |          |
|----|----------|----------|----------|
| C  | -3.06450 | -1.44237 | -3.07393 |
| C  | -4.26170 | -2.10822 | -2.73744 |
| C  | -5.14445 | -1.52734 | -1.86265 |
| H  | 1.73764  | 1.08995  | -1.26342 |
| H  | 2.39150  | 3.00944  | -2.56262 |
| H  | 4.11315  | 4.21185  | -0.81907 |
| H  | 4.36395  | 2.50931  | -1.25910 |
| H  | 0.65751  | 0.98302  | 1.81245  |
| H  | 1.95419  | 1.25180  | 3.91222  |
| H  | 4.09805  | 2.48563  | 3.91456  |
| H  | 4.99965  | 3.45263  | 1.80989  |
| H  | -6.70761 | -0.16256 | -0.15053 |
| H  | -6.16770 | 2.00823  | 0.92168  |
| Cl | -3.83617 | 3.57851  | 0.89209  |
| H  | -1.83399 | 0.27762  | -2.79961 |
| H  | -2.38030 | -1.88976 | -3.79251 |
| H  | -4.48800 | -3.07306 | -3.18586 |
| H  | -6.08425 | -2.01899 | -1.61316 |
| Au | -0.92891 | -0.70592 | -0.01381 |
| C  | -1.32938 | -2.70646 | 0.20845  |
| C  | -2.32466 | -3.01548 | 1.15111  |
| C  | -0.80447 | -3.68524 | -0.61927 |
| C  | -2.75776 | -4.33428 | 1.27223  |
| C  | -1.24693 | -5.00479 | -0.48744 |
| H  | -0.07274 | -3.43803 | -1.38835 |
| C  | -2.21402 | -5.32454 | 0.45866  |
| H  | -3.52952 | -4.59497 | 1.99638  |
| H  | -0.83732 | -5.77936 | -1.13376 |
| H  | -2.55799 | -6.35233 | 0.55827  |
| C  | -2.25563 | -0.63023 | 1.54197  |
| C  | -2.56480 | 0.53905  | 2.21102  |
| C  | -2.81615 | -1.86681 | 1.90547  |
| C  | -3.50062 | 0.49671  | 3.24931  |
| H  | -2.09978 | 1.48711  | 1.94377  |
| C  | -3.75682 | -1.88355 | 2.93405  |
| C  | -4.10210 | -0.70725 | 3.59445  |

---

|   |          |          |          |
|---|----------|----------|----------|
| H | -3.75800 | 1.41620  | 3.77306  |
| H | -4.21595 | -2.82568 | 3.23302  |
| H | -4.83641 | -0.73719 | 4.39715  |
| O | 0.78977  | -0.90659 | -1.47099 |
| C | 3.12691  | -1.21775 | -1.46825 |
| C | 1.82213  | -1.50089 | -1.04925 |
| C | 5.54575  | -1.70572 | -1.26236 |
| C | 4.20213  | -1.92078 | -0.94793 |
| C | 6.61135  | -2.50101 | -0.81225 |
| H | 1.70387  | -2.29549 | -0.28439 |
| H | 3.97097  | -2.73400 | -0.24966 |
| H | 3.28534  | -0.43678 | -2.21547 |
| C | 7.86173  | -2.59778 | -1.63902 |
| H | 6.32632  | -3.42574 | -0.29890 |
| H | 5.77599  | -0.88337 | -1.94602 |
| H | 8.72508  | -2.94363 | -1.05820 |
| H | 7.70935  | -3.31499 | -2.45703 |
| H | 8.11345  | -1.63039 | -2.09198 |
| C | 7.30562  | -1.67868 | 0.93848  |
| C | 7.73903  | -0.41119 | 0.54484  |
| C | 6.65240  | 0.49545  | 0.59507  |
| C | 5.56557  | -0.14791 | 1.12825  |
| C | 5.99301  | -1.47353 | 1.64476  |
| H | 7.99718  | -2.47252 | 1.21898  |
| H | 8.73082  | -0.18060 | 0.16326  |
| H | 6.66852  | 1.51960  | 0.23127  |
| H | 4.57178  | 0.27283  | 1.26509  |
| H | 6.21226  | -1.36239 | 2.72196  |
| H | 5.25607  | -2.27880 | 1.56357  |
| O | 1.69126  | 4.42407  | -1.23066 |
| C | 0.44360  | 4.52943  | -1.86461 |
| H | 0.55387  | 4.50230  | -2.96426 |
| H | 0.00799  | 5.49647  | -1.59394 |

---

Bottom, towards, 2, endo, away

M06/lanl2dz-6-31G(d) Energy = -2646.112867

M06/lanl2dz-6-31G(d) Free Energy = -2645.477862

M06/def2-TZVP Derived free energy = -2646.588130

M06/def2-TZVP Derived free energy in solution (toluene) = -2646.618801

M06/def2-TZVP Derived free energy in solution (nitromethane) = -2646.643371

Number of Imaginary Frequencies = 1 (-383.21)

M06/lanl2dz-6-31G(d) Geometry

|   |          |          |          |
|---|----------|----------|----------|
| C | -0.07489 | 3.02379  | -0.25987 |
| C | -0.31912 | 4.49407  | -0.65576 |
| C | -1.57146 | 2.66021  | -2.26289 |
| N | -0.95772 | 2.19758  | -1.11901 |
| C | -1.30857 | 0.90434  | -0.94410 |
| N | -2.12074 | 0.65959  | -1.98241 |
| N | -2.29460 | 1.73464  | -2.81675 |
| C | -1.55686 | 4.91099  | 0.16270  |
| C | -1.40572 | 4.07196  | 1.39949  |
| C | -0.51900 | 3.01310  | 1.17413  |
| C | -0.16344 | 2.14711  | 2.19984  |
| C | -0.75482 | 2.30830  | 3.45010  |
| C | -1.66409 | 3.34204  | 3.66832  |
| C | -1.98393 | 4.23961  | 2.65075  |
| C | -2.83431 | -0.55425 | -2.21373 |
| C | -2.11823 | -1.72788 | -2.57479 |
| C | -2.85137 | -2.94247 | -2.71759 |
| C | -4.25564 | -2.92940 | -2.54433 |
| C | -4.92397 | -1.77981 | -2.21625 |
| C | -4.19989 | -0.58491 | -2.03340 |
| C | -0.71562 | -1.74686 | -2.76957 |
| C | -0.07010 | -2.92647 | -3.04818 |
| C | -0.79043 | -4.13292 | -3.17367 |
| C | -2.15376 | -4.13510 | -3.02241 |
| H | 0.95594  | 2.68827  | -0.43472 |
| H | 0.54529  | 5.07039  | -0.30274 |

---

|    |          |          |          |
|----|----------|----------|----------|
| H  | -2.49173 | 4.67007  | -0.36783 |
| H  | -1.57607 | 5.98961  | 0.35903  |
| H  | 0.56703  | 1.35295  | 2.03825  |
| H  | -0.50590 | 1.62306  | 4.25837  |
| H  | -2.11698 | 3.46030  | 4.65095  |
| H  | -2.67099 | 5.06376  | 2.83830  |
| H  | -4.80618 | -3.86109 | -2.66932 |
| H  | -6.00148 | -1.76918 | -2.07449 |
| Cl | -5.07025 | 0.83333  | -1.53208 |
| H  | -0.14033 | -0.82735 | -2.69258 |
| H  | 1.01005  | -2.92444 | -3.18331 |
| H  | -0.26355 | -5.05768 | -3.39914 |
| H  | -2.72373 | -5.05767 | -3.12755 |
| Au | -0.56532 | -0.60445 | 0.40831  |
| C  | 0.05618  | -2.14981 | 1.60580  |
| C  | -0.79964 | -2.45113 | 2.68001  |
| C  | 1.19226  | -2.90738 | 1.37045  |
| C  | -0.47300 | -3.50001 | 3.53656  |
| C  | 1.50656  | -3.96231 | 2.23258  |
| H  | 1.82818  | -2.70358 | 0.50793  |
| C  | 0.68039  | -4.24795 | 3.31349  |
| H  | -1.12224 | -3.75027 | 4.37552  |
| H  | 2.39448  | -4.56584 | 2.05045  |
| H  | 0.92693  | -5.07001 | 3.98290  |
| C  | -2.13538 | -0.67801 | 1.71060  |
| C  | -3.20488 | 0.19678  | 1.64896  |
| C  | -1.99436 | -1.61287 | 2.74999  |
| C  | -4.18690 | 0.13075  | 2.64107  |
| H  | -3.28954 | 0.94070  | 0.85812  |
| C  | -2.98385 | -1.65582 | 3.73170  |
| C  | -4.07355 | -0.79184 | 3.67416  |
| H  | -5.03826 | 0.80784  | 2.59814  |
| H  | -2.90290 | -2.37012 | 4.55064  |
| H  | -4.83964 | -0.84087 | 4.44563  |
| O  | 1.34713  | -0.34230 | -0.77674 |
| C  | 3.60976  | 0.30905  | -0.85125 |



---

|   |          |          |          |
|---|----------|----------|----------|
| C | 2.43469  | -0.08936 | -0.19653 |
| C | 5.97153  | 1.04365  | -0.64246 |
| C | 4.75402  | 0.58686  | -0.12559 |
| C | 7.05508  | 1.44351  | 0.15587  |
| H | 2.49124  | -0.18581 | 0.90832  |
| H | 4.68673  | 0.48086  | 0.96454  |
| H | 3.59393  | 0.40853  | -1.93719 |
| C | 7.99076  | 2.50889  | -0.34024 |
| H | 6.85436  | 1.47416  | 1.23275  |
| H | 6.04842  | 1.17397  | -1.72488 |
| H | 8.18467  | 2.39596  | -1.41447 |
| H | 7.53752  | 3.49846  | -0.19038 |
| H | 8.95165  | 2.50477  | 0.18839  |
| C | 8.30175  | -0.17689 | 0.36913  |
| C | 8.77265  | -0.36791 | -0.93071 |
| C | 7.87058  | -1.19453 | -1.64407 |
| C | 6.90065  | -1.63117 | -0.78084 |
| C | 7.27786  | -1.25347 | 0.60747  |
| H | 8.93405  | 0.20902  | 1.16828  |
| H | 9.64249  | 0.12318  | -1.36020 |
| H | 7.92093  | -1.40780 | -2.70755 |
| H | 6.04985  | -2.25740 | -1.03503 |
| H | 6.44916  | -1.00654 | 1.27872  |
| H | 7.80502  | -2.11086 | 1.06356  |
| O | -0.35719 | 4.70411  | -2.04381 |
| C | -1.41791 | 4.07301  | -2.71249 |
| H | -1.19049 | 4.10457  | -3.78365 |
| H | -2.37155 | 4.60915  | -2.56785 |

M06/lanl2dz-6-31G(d) Energy = -2646.113291

M06/lanl2dz-6-31G(d) Free Energy = -2645.478507

M06/def2-TZVP Derived free energy = -2646.590395

M06/def2-TZVP Derived free energy in solution (toluene) = -2646.621386

M06/def2-TZVP Derived free energy in solution (nitromethane) = -2646.646852

Number of Imaginary Frequencies = 1 (-382.93)

---

M06/lanl2dz-6-31G(d) Geometry

|    |          |          |          |
|----|----------|----------|----------|
| C  | -0.07196 | 3.05451  | -0.33957 |
| C  | 0.15216  | 4.39610  | -1.07410 |
| C  | -1.96988 | 2.83975  | -1.96355 |
| N  | -1.16037 | 2.31350  | -0.98165 |
| C  | -1.52539 | 1.02968  | -0.76851 |
| N  | -2.53371 | 0.84980  | -1.63926 |
| N  | -2.82266 | 1.96037  | -2.39246 |
| C  | 0.77675  | 5.29561  | -0.01248 |
| C  | 0.20023  | 4.76446  | 1.27120  |
| C  | -0.31618 | 3.48107  | 1.08556  |
| C  | -0.90257 | 2.78380  | 2.13271  |
| C  | -0.97218 | 3.39593  | 3.38291  |
| C  | -0.45497 | 4.67574  | 3.57333  |
| C  | 0.13638  | 5.36863  | 2.51885  |
| C  | -3.27336 | -0.35854 | -1.80128 |
| C  | -2.58721 | -1.53029 | -2.22600 |
| C  | -3.29971 | -2.76438 | -2.21579 |
| C  | -4.67076 | -2.77064 | -1.86548 |
| C  | -5.32096 | -1.61918 | -1.50998 |
| C  | -4.60730 | -0.40524 | -1.45827 |
| C  | -1.22638 | -1.53167 | -2.62291 |
| C  | -0.59190 | -2.70974 | -2.93242 |
| C  | -1.28651 | -3.93656 | -2.88761 |
| C  | -2.61660 | -3.95718 | -2.55270 |
| H  | 0.82605  | 2.42252  | -0.42463 |
| H  | 0.77179  | 4.27292  | -1.97994 |
| H  | 0.53192  | 6.34578  | -0.21372 |
| H  | 1.87320  | 5.20309  | -0.03225 |
| H  | -1.31775 | 1.78530  | 1.99131  |
| H  | -1.44036 | 2.87110  | 4.21324  |
| H  | -0.52273 | 5.14306  | 4.55399  |
| H  | 0.52820  | 6.37398  | 2.66884  |
| H  | -5.20952 | -3.71734 | -1.87721 |
| H  | -6.37306 | -1.62166 | -1.23715 |
| Cl | -5.43756 | 1.00493  | -0.87899 |

---

|    |          |          |          |
|----|----------|----------|----------|
| H  | -0.67653 | -0.59544 | -2.68996 |
| H  | 0.45685  | -2.69084 | -3.22377 |
| H  | -0.76925 | -4.86128 | -3.13396 |
| H  | -3.17148 | -4.89469 | -2.53542 |
| Au | -0.56200 | -0.57246 | 0.34007  |
| C  | 0.25685  | -2.22450 | 1.24654  |
| C  | -0.55024 | -2.82639 | 2.22783  |
| C  | 1.47078  | -2.78975 | 0.88953  |
| C  | -0.09776 | -3.97517 | 2.87292  |
| C  | 1.91309  | -3.94499 | 1.54061  |
| H  | 2.07749  | -2.35519 | 0.09441  |
| C  | 1.13437  | -4.52717 | 2.53368  |
| H  | -0.70909 | -4.45358 | 3.63773  |
| H  | 2.86581  | -4.39369 | 1.26219  |
| H  | 1.48017  | -5.42615 | 3.04049  |
| C  | -2.08301 | -1.05304 | 1.61911  |
| C  | -3.26041 | -0.33110 | 1.70257  |
| C  | -1.83704 | -2.16802 | 2.43848  |
| C  | -4.23980 | -0.73416 | 2.61482  |
| H  | -3.44008 | 0.54377  | 1.07980  |
| C  | -2.82563 | -2.54876 | 3.34494  |
| C  | -4.01929 | -1.83766 | 3.42943  |
| H  | -5.17082 | -0.17342 | 2.68136  |
| H  | -2.66399 | -3.40957 | 3.99305  |
| H  | -4.78182 | -2.14984 | 4.14037  |
| O  | 1.25206  | -0.07136 | -0.89585 |
| C  | 3.57171  | 0.31437  | -1.01327 |
| C  | 2.36309  | 0.12236  | -0.33164 |
| C  | 6.01481  | 0.71357  | -0.86820 |
| C  | 4.74866  | 0.51002  | -0.31112 |
| C  | 7.16209  | 1.02036  | -0.11931 |
| H  | 2.40658  | 0.13699  | 0.77675  |
| H  | 4.67380  | 0.54012  | 0.78306  |
| H  | 3.56567  | 0.29007  | -2.10363 |
| C  | 8.25437  | 1.84491  | -0.73864 |
| H  | 6.98780  | 1.21326  | 0.94519  |

---

|   |          |          |          |
|---|----------|----------|----------|
| H | 6.09940  | 0.69532  | -1.95791 |
| H | 8.40466  | 1.57574  | -1.79188 |
| H | 7.97852  | 2.90781  | -0.70715 |
| H | 9.21172  | 1.73916  | -0.21426 |
| C | 8.12417  | -0.74747 | 0.29328  |
| C | 8.51750  | -1.18504 | -0.97236 |
| C | 7.47077  | -1.93804 | -1.55935 |
| C | 6.46964  | -2.08858 | -0.63687 |
| C | 6.94355  | -1.59470 | 0.68324  |
| H | 8.83521  | -0.37091 | 1.02813  |
| H | 9.44270  | -0.90736 | -1.47150 |
| H | 7.45351  | -2.29600 | -2.58429 |
| H | 5.51850  | -2.59004 | -0.79602 |
| H | 6.18539  | -1.12227 | 1.31603  |
| H | 7.33310  | -2.45785 | 1.25246  |
| O | -1.09251 | 4.96849  | -1.42445 |
| C | -1.76618 | 4.24435  | -2.41768 |
| H | -1.20053 | 4.25023  | -3.36790 |
| H | -2.73018 | 4.73138  | -2.59677 |

Top, away, 1, endo, away

M06/lanl2dz-6-31G(d) Energy = -2646.113238

M06/lanl2dz-6-31G(d) Free Energy = -2645.477637

M06/def2-TZVP Derived free energy = -2646.587000

M06/def2-TZVP Derived free energy in solution (toluene) = -2646.617893

M06/def2-TZVP Derived free energy in solution (nitromethane) = -2646.642528

Number of Imaginary Frequencies = 1 (-384.12)

M06/lanl2dz-6-31G(d) Geometry

|   |         |          |         |
|---|---------|----------|---------|
| C | 1.62657 | -1.13186 | 3.34886 |
| C | 0.56720 | -1.29879 | 4.47473 |
| C | 1.15872 | 1.26602  | 3.48503 |
| N | 1.37539 | 0.16477  | 2.68869 |
| C | 1.38278 | 0.55561  | 1.39596 |
| N | 1.19648 | 1.88613  | 1.48929 |

---

|    |          |          |          |
|----|----------|----------|----------|
| N  | 1.03801  | 2.34641  | 2.77743  |
| C  | -0.57181 | -2.07751 | 3.81059  |
| C  | 0.13694  | -2.88010 | 2.76064  |
| C  | 1.39322  | -2.33473 | 2.49187  |
| C  | 2.24678  | -2.89901 | 1.54981  |
| C  | 1.81254  | -4.02478 | 0.85341  |
| C  | 0.55247  | -4.56632 | 1.11085  |
| C  | -0.29002 | -4.00526 | 2.06866  |
| C  | 1.19922  | 2.81887  | 0.41068  |
| C  | 0.04713  | 2.94177  | -0.41051 |
| C  | 0.09210  | 3.85295  | -1.50551 |
| C  | 1.26245  | 4.61915  | -1.72079 |
| C  | 2.34665  | 4.51032  | -0.89169 |
| C  | 2.31036  | 3.60224  | 0.18562  |
| C  | -1.14084 | 2.20829  | -0.17853 |
| C  | -2.21847 | 2.35480  | -1.01685 |
| C  | -2.17265 | 3.24212  | -2.11237 |
| C  | -1.03935 | 3.97877  | -2.34620 |
| H  | 2.64910  | -1.07440 | 3.74872  |
| H  | 1.03837  | -1.90985 | 5.26366  |
| H  | -1.26306 | -1.35485 | 3.34741  |
| H  | -1.14761 | -2.67565 | 4.52663  |
| H  | 3.23323  | -2.47194 | 1.36062  |
| H  | 2.45893  | -4.48302 | 0.10770  |
| H  | 0.23103  | -5.45064 | 0.56315  |
| H  | -1.26583 | -4.44530 | 2.27128  |
| H  | 1.28784  | 5.31229  | -2.56069 |
| H  | 3.24204  | 5.10661  | -1.04669 |
| Cl | 3.70052  | 3.50611  | 1.22173  |
| H  | -1.19775 | 1.53198  | 0.67283  |
| H  | -3.11786 | 1.76968  | -0.82639 |
| H  | -3.03745 | 3.34433  | -2.76580 |
| H  | -0.99024 | 4.67545  | -3.18229 |
| Au | 1.23285  | -0.68522 | -0.39050 |
| C  | 1.08119  | -1.82423 | -2.09652 |
| C  | 2.13671  | -1.66379 | -3.01207 |

---

|   |          |          |          |
|---|----------|----------|----------|
| C | 0.05197  | -2.71405 | -2.36003 |
| C | 2.11220  | -2.36880 | -4.21353 |
| C | 0.04125  | -3.42187 | -3.56577 |
| H | -0.74018 | -2.88903 | -1.63225 |
| C | 1.06182  | -3.23863 | -4.49141 |
| H | 2.91888  | -2.25185 | -4.93710 |
| H | -0.76606 | -4.12225 | -3.77442 |
| H | 1.05027  | -3.78868 | -5.43051 |
| C | 3.02604  | -0.25041 | -1.26254 |
| C | 3.98843  | 0.53665  | -0.65734 |
| C | 3.20731  | -0.78640 | -2.54908 |
| C | 5.16032  | 0.83507  | -1.35859 |
| H | 3.84673  | 0.93581  | 0.34517  |
| C | 4.38415  | -0.47750 | -3.22982 |
| C | 5.34978  | 0.33359  | -2.64038 |
| H | 5.91727  | 1.46406  | -0.89276 |
| H | 4.55408  | -0.87850 | -4.22875 |
| H | 6.26112  | 0.56867  | -3.18691 |
| O | -0.82919 | -1.11608 | 0.42439  |
| C | -3.17370 | -1.07780 | 0.24349  |
| C | -1.86760 | -0.97943 | -0.26871 |
| C | -5.61374 | -0.99059 | -0.22260 |
| C | -4.26373 | -0.88725 | -0.58380 |
| C | -6.67111 | -0.89702 | -1.14319 |
| H | -1.77047 | -0.76414 | -1.35223 |
| H | -4.04907 | -0.66617 | -1.63776 |
| H | -3.30290 | -1.31041 | 1.30180  |
| C | -7.93209 | -1.68041 | -0.90861 |
| H | -6.36463 | -0.83119 | -2.19349 |
| H | -5.84607 | -1.24858 | 0.81367  |
| H | -7.77835 | -2.72548 | -1.21026 |
| H | -8.20555 | -1.68321 | 0.15426  |
| H | -8.78178 | -1.29439 | -1.48491 |
| C | -7.33693 | 1.03448  | -1.13248 |
| C | -7.90034 | 1.15821  | 0.13957  |
| C | -6.89689 | 1.52980  | 1.06659  |

---

|   |          |          |          |
|---|----------|----------|----------|
| C | -5.73402 | 1.76719  | 0.38266  |
| C | -6.01956 | 1.76140  | -1.07828 |
| H | -7.94388 | 1.00572  | -2.03722 |
| H | -8.92640 | 0.90678  | 0.39667  |
| H | -7.02320 | 1.57677  | 2.14400  |
| H | -4.77935 | 2.04962  | 0.82013  |
| H | -6.20481 | 2.80427  | -1.39433 |
| H | -5.22408 | 1.37328  | -1.72399 |
| C | 0.95155  | 1.01005  | 4.93568  |
| H | 1.91112  | 0.82341  | 5.44974  |
| H | 0.46587  | 1.86357  | 5.41668  |
| O | 0.08133  | -0.09528 | 5.03088  |

M06/lanl2dz-6-31G(d) Energy = -2646.111998

M06/lanl2dz-6-31G(d) Free Energy = -2645.474258

M06/def2-TZVP Derived free energy = -2646.585241

M06/def2-TZVP Derived free energy in solution (toluene) = -2646.616245

M06/def2-TZVP Derived free energy in solution (nitromethane) = -2646.641179

Number of Imaginary Frequencies = 1 (-376.94)

M06/lanl2dz-6-31G(d) Geometry

|   |          |          |          |
|---|----------|----------|----------|
| C | -3.79714 | -1.10609 | 1.32210  |
| C | -4.47878 | -2.20713 | 2.15865  |
| C | -2.74327 | -3.13927 | 0.25668  |
| N | -2.76822 | -1.78009 | 0.48156  |
| C | -1.72788 | -1.22291 | -0.18577 |
| N | -1.13291 | -2.27167 | -0.76397 |
| N | -1.74469 | -3.47443 | -0.50348 |
| C | -3.55291 | -2.38904 | 3.37728  |
| C | -3.01786 | -0.99670 | 3.55827  |
| C | -3.19503 | -0.24364 | 2.39268  |
| C | -2.88429 | 1.11090  | 2.35759  |
| C | -2.31083 | 1.69288  | 3.48592  |
| C | -2.09283 | 0.93385  | 4.63524  |
| C | -2.46320 | -0.40897 | 4.68727  |
| C | 0.06110  | -2.27338 | -1.54216 |

---

|    |          |          |          |
|----|----------|----------|----------|
| C  | 1.26465  | -2.69863 | -0.91765 |
| C  | 2.43424  | -2.81303 | -1.72076 |
| C  | 2.37023  | -2.45823 | -3.08995 |
| C  | 1.20399  | -2.02326 | -3.66093 |
| C  | 0.03072  | -1.95068 | -2.88062 |
| C  | 1.33939  | -3.01582 | 0.45982  |
| C  | 2.51837  | -3.45720 | 1.00657  |
| C  | 3.66979  | -3.61278 | 0.20478  |
| C  | 3.62750  | -3.29133 | -1.12911 |
| H  | -4.48285 | -0.58621 | 0.64093  |
| H  | -5.43479 | -1.79646 | 2.50687  |
| H  | -2.74266 | -3.10608 | 3.16872  |
| H  | -4.09372 | -2.77078 | 4.25146  |
| H  | -3.11344 | 1.71633  | 1.48085  |
| H  | -2.05188 | 2.75002  | 3.47243  |
| H  | -1.65468 | 1.40386  | 5.51387  |
| H  | -2.33259 | -0.98160 | 5.60463  |
| H  | 3.27117  | -2.54402 | -3.69675 |
| H  | 1.15169  | -1.75641 | -4.71330 |
| Cl | -1.44725 | -1.48413 | -3.65477 |
| H  | 0.45574  | -2.90242 | 1.08438  |
| H  | 2.56312  | -3.70242 | 2.06580  |
| H  | 4.58947  | -3.99305 | 0.64728  |
| H  | 4.50755  | -3.41490 | -1.76161 |
| Au | -1.11335 | 0.83514  | -0.25680 |
| C  | -0.69303 | 2.85227  | -0.21451 |
| C  | -1.61150 | 3.65949  | -0.90973 |
| C  | 0.34046  | 3.43202  | 0.50617  |
| C  | -1.44475 | 5.04288  | -0.91240 |
| C  | 0.49502  | 4.82134  | 0.50215  |
| H  | 1.02890  | 2.82449  | 1.09389  |
| C  | -0.38815 | 5.62009  | -0.21431 |
| H  | -2.14521 | 5.67966  | -1.45248 |
| H  | 1.30719  | 5.27688  | 1.06664  |
| H  | -0.26431 | 6.70133  | -0.21931 |
| C  | -2.69761 | 1.53611  | -1.34687 |



---

|   |          |          |          |
|---|----------|----------|----------|
| C | -3.68101 | 0.72291  | -1.88639 |
| C | -2.70524 | 2.92832  | -1.54457 |
| C | -4.70924 | 1.30054  | -2.63602 |
| H | -3.65715 | -0.35813 | -1.75504 |
| C | -3.74155 | 3.48382  | -2.29477 |
| C | -4.73604 | 2.67539  | -2.83581 |
| H | -5.48305 | 0.66665  | -3.06499 |
| H | -3.77314 | 4.56015  | -2.46119 |
| H | -5.53705 | 3.12445  | -3.41963 |
| O | 0.73177  | 0.17987  | 0.81796  |
| C | 3.05968  | 0.40905  | 1.12184  |
| C | 1.85496  | 0.58369  | 0.42045  |
| C | 5.44078  | 1.09023  | 1.33794  |
| C | 4.20609  | 1.03750  | 0.67534  |
| C | 6.49210  | 1.93583  | 0.94995  |
| H | 1.91968  | 1.14150  | -0.53634 |
| H | 4.12232  | 1.61308  | -0.25532 |
| H | 3.04458  | -0.15027 | 2.05778  |
| C | 7.41738  | 2.49587  | 1.99300  |
| H | 6.25874  | 2.62235  | 0.12840  |
| H | 5.54182  | 0.53263  | 2.27235  |
| H | 7.64152  | 1.74857  | 2.76478  |
| H | 8.36413  | 2.85256  | 1.56935  |
| H | 6.93827  | 3.34902  | 2.49265  |
| C | 7.77146  | 0.84850  | -0.23627 |
| C | 8.28468  | -0.09338 | 0.65645  |
| C | 7.41097  | -1.20602 | 0.71919  |
| C | 6.41836  | -1.03875 | -0.21100 |
| C | 6.75603  | 0.12328  | -1.07561 |
| H | 8.37072  | 1.66871  | -0.63069 |
| H | 9.16072  | 0.05065  | 1.28384  |
| H | 7.49266  | -2.02814 | 1.42432  |
| H | 5.57737  | -1.70615 | -0.38395 |
| H | 7.28231  | -0.25599 | -1.97025 |
| H | 5.90712  | 0.71114  | -1.43921 |
| C | -3.73074 | -4.05939 | 0.89076  |

---

|   |          |          |         |
|---|----------|----------|---------|
| H | -4.12696 | -4.75716 | 0.14473 |
| H | -3.22092 | -4.66409 | 1.66096 |
| O | -4.81850 | -3.35099 | 1.41922 |

M06/lanl2dz-6-31G(d) Energy = -2646.112232

M06/lanl2dz-6-31G(d) Free Energy = -2645.475812

M06/def2-TZVP Derived free energy = -2646.585535

M06/def2-TZVP Derived free energy in solution (toluene) = -2646.616715

M06/def2-TZVP Derived free energy in solution (nitromethane) = -2646.641731

Number of Imaginary Frequencies = 1 (-390.05)

M06/lanl2dz-6-31G(d) Geometry

|   |          |          |          |
|---|----------|----------|----------|
| C | -2.71433 | -1.24338 | 2.34482  |
| C | -2.89024 | -2.30029 | 3.45342  |
| C | -1.89444 | -3.27304 | 1.09031  |
| N | -2.00527 | -1.90512 | 1.21567  |
| C | -1.41094 | -1.33200 | 0.13943  |
| N | -0.96617 | -2.38297 | -0.56179 |
| N | -1.25645 | -3.59963 | 0.00696  |
| C | -1.57119 | -2.24866 | 4.24841  |
| C | -1.20166 | -0.79821 | 4.11808  |
| C | -1.87945 | -0.21063 | 3.04394  |
| C | -1.78948 | 1.15418  | 2.79707  |
| C | -0.95146 | 1.92343  | 3.60096  |
| C | -0.24507 | 1.33410  | 4.64883  |
| C | -0.37726 | -0.02575 | 4.92537  |
| C | -0.25453 | -2.34154 | -1.79560 |
| C | 1.14105  | -2.61381 | -1.78855 |
| C | 1.84410  | -2.56479 | -3.02771 |
| C | 1.13702  | -2.24230 | -4.21206 |
| C | -0.20912 | -1.99228 | -4.19261 |
| C | -0.91364 | -2.05565 | -2.97112 |
| C | 1.85315  | -2.92474 | -0.60641 |
| C | 3.19722  | -3.19853 | -0.66025 |
| C | 3.89550  | -3.15897 | -1.88657 |
| C | 3.23150  | -2.84000 | -3.04404 |

---

|    |          |          |          |
|----|----------|----------|----------|
| H  | -3.66724 | -0.86731 | 1.95153  |
| H  | -3.70031 | -1.94540 | 4.10279  |
| H  | -0.80322 | -2.90042 | 3.80191  |
| H  | -1.70280 | -2.58055 | 5.28514  |
| H  | -2.38583 | 1.62329  | 2.01472  |
| H  | -0.86859 | 2.99379  | 3.42254  |
| H  | 0.39356  | 1.95068  | 5.27907  |
| H  | 0.14152  | -0.46998 | 5.77413  |
| H  | 1.68219  | -2.20524 | -5.15459 |
| H  | -0.75697 | -1.75766 | -5.10185 |
| Cl | -2.62454 | -1.78618 | -2.99768 |
| H  | 1.32493  | -2.96229 | 0.34363  |
| H  | 3.72706  | -3.46720 | 0.25293  |
| H  | 4.95831  | -3.39439 | -1.91255 |
| H  | 3.75717  | -2.80913 | -3.99798 |
| Au | -1.17607 | 0.75464  | -0.38008 |
| C  | -1.02797 | 2.76895  | -0.76235 |
| C  | -2.25690 | 3.42487  | -0.95290 |
| C  | 0.16122  | 3.48044  | -0.77621 |
| C  | -2.26986 | 4.80077  | -1.17273 |
| C  | 0.13493  | 4.86030  | -0.99910 |
| H  | 1.11578  | 2.98336  | -0.60905 |
| C  | -1.07511 | 5.51400  | -1.19879 |
| H  | -3.21346 | 5.32495  | -1.32299 |
| H  | 1.06727  | 5.42262  | -1.01469 |
| H  | -1.09179 | 6.58812  | -1.37331 |
| C  | -3.16080 | 1.19537  | -0.63908 |
| C  | -4.17938 | 0.25656  | -0.59356 |
| C  | -3.42720 | 2.55283  | -0.89177 |
| C  | -5.50166 | 0.67262  | -0.77317 |
| H  | -3.96836 | -0.80271 | -0.44684 |
| C  | -4.75391 | 2.94638  | -1.06741 |
| C  | -5.78348 | 2.01363  | -1.00384 |
| H  | -6.30538 | -0.06055 | -0.73826 |
| H  | -4.98648 | 3.99260  | -1.26371 |
| H  | -6.81308 | 2.33641  | -1.14471 |

---

|   |          |          |          |
|---|----------|----------|----------|
| O | 1.03760  | 0.52810  | -0.19859 |
| C | 3.11146  | 0.73450  | -1.31687 |
| C | 1.72914  | 0.47294  | -1.25307 |
| C | 5.14340  | 1.63232  | -0.20979 |
| C | 3.80841  | 1.20701  | -0.22031 |
| C | 5.74541  | 2.25019  | 0.89700  |
| H | 1.22648  | 0.23135  | -2.20815 |
| H | 3.23532  | 1.31286  | 0.70739  |
| H | 3.60441  | 0.62075  | -2.28269 |
| C | 6.83732  | 3.26033  | 0.68961  |
| H | 5.07167  | 2.46522  | 1.73377  |
| H | 5.71053  | 1.56553  | -1.14182 |
| H | 7.44333  | 3.41670  | 1.59032  |
| H | 7.50355  | 2.96189  | -0.12994 |
| H | 6.39724  | 4.22981  | 0.41819  |
| C | 6.70505  | 0.76795  | 1.97239  |
| C | 7.72781  | 0.39148  | 1.10146  |
| C | 7.24055  | -0.58166 | 0.19506  |
| C | 5.96104  | -0.91394 | 0.55572  |
| C | 5.65713  | -0.30780 | 1.87981  |
| H | 6.89295  | 1.32040  | 2.89265  |
| H | 8.71207  | 0.85100  | 1.05452  |
| H | 7.77744  | -0.95511 | -0.67193 |
| H | 5.29667  | -1.59435 | 0.02877  |
| H | 4.61852  | -0.00179 | 2.03858  |
| H | 5.88973  | -1.05524 | 2.66003  |
| O | -3.31942 | -3.55172 | 2.98449  |
| C | -2.41915 | -4.20315 | 2.13047  |
| H | -1.57405 | -4.64640 | 2.68547  |
| H | -2.95892 | -5.02849 | 1.65325  |

M06/lanl2dz-6-31G(d) Energy = -2646.111462

M06/lanl2dz-6-31G(d) Free Energy = -2645.473323

M06/def2-TZVP Derived free energy = -2646.583308

M06/def2-TZVP Derived free energy in solution (toluene) = -2646.614592

M06/def2-TZVP Derived free energy in solution (nitromethane) = -2646.639787

---

Number of Imaginary Frequencies = 1 (-405.20)

M06/lanl2dz-6-31G(d) Geometry

|   |          |          |          |
|---|----------|----------|----------|
| C | -2.78784 | -1.74728 | 1.92205  |
| C | -3.03049 | -3.03954 | 2.72819  |
| C | -1.90979 | -3.42708 | 0.25348  |
| N | -2.03278 | -2.12845 | 0.69804  |
| C | -1.39440 | -1.31687 | -0.18092 |
| N | -0.91120 | -2.17139 | -1.09203 |
| N | -1.21913 | -3.48752 | -0.84550 |
| C | -1.75730 | -3.21071 | 3.57989  |
| C | -1.35949 | -1.78186 | 3.81711  |
| C | -1.97113 | -0.93614 | 2.88552  |
| C | -1.83684 | 0.44478  | 2.97147  |
| C | -1.01806 | 0.97467  | 3.96587  |
| C | -0.37685 | 0.13181  | 4.87301  |
| C | -0.55636 | -1.24922 | 4.81681  |
| C | -0.11962 | -1.84385 | -2.23145 |
| C | 1.27805  | -2.10047 | -2.18203 |
| C | 2.06393  | -1.77545 | -3.32606 |
| C | 1.43380  | -1.20606 | -4.45929 |
| C | 0.08479  | -0.97396 | -4.48262 |
| C | -0.70225 | -1.30959 | -3.36025 |
| C | 1.91628  | -2.64724 | -1.04275 |
| C | 3.26916  | -2.87891 | -1.05194 |
| C | 4.04788  | -2.57100 | -2.18862 |
| C | 3.45671  | -2.02273 | -3.29836 |
| H | -3.71647 | -1.26483 | 1.59111  |
| H | -3.87355 | -2.83910 | 3.40092  |
| H | -0.97159 | -3.75616 | 3.03327  |
| H | -1.95175 | -3.77535 | 4.49951  |
| H | -2.38763 | 1.10470  | 2.30109  |
| H | -0.90065 | 2.05337  | 4.04865  |
| H | 0.24792  | 0.56033  | 5.65469  |
| H | -0.08867 | -1.89761 | 5.55681  |
| H | 2.04192  | -0.95677 | -5.32822 |

---

|    |          |          |          |
|----|----------|----------|----------|
| H  | -0.40237 | -0.54575 | -5.35489 |
| Cl | -2.41127 | -1.04779 | -3.45256 |
| H  | 1.32568  | -2.89296 | -0.16261 |
| H  | 3.74608  | -3.31702 | -0.17604 |
| H  | 5.11652  | -2.77922 | -2.18575 |
| H  | 4.04558  | -1.78106 | -4.18280 |
| Au | -1.19816 | 0.83722  | -0.19740 |
| C  | -1.10263 | 2.88886  | -0.12136 |
| C  | -2.33888 | 3.54484  | -0.25439 |
| C  | 0.05875  | 3.60923  | 0.10702  |
| C  | -2.38589 | 4.93467  | -0.16969 |
| C  | -0.00122 | 5.00326  | 0.18901  |
| H  | 1.01615  | 3.10614  | 0.23279  |
| C  | -1.21799 | 5.65989  | 0.04833  |
| H  | -3.33497 | 5.46086  | -0.27075 |
| H  | 0.90928  | 5.57330  | 0.36682  |
| H  | -1.26204 | 6.74539  | 0.11297  |
| C  | -3.17681 | 1.28160  | -0.49446 |
| C  | -4.16212 | 0.33099  | -0.70820 |
| C  | -3.47771 | 2.65522  | -0.46446 |
| C  | -5.48665 | 0.74420  | -0.87687 |
| H  | -3.92279 | -0.73049 | -0.76641 |
| C  | -4.80602 | 3.04538  | -0.63382 |
| C  | -5.80296 | 2.09659  | -0.83504 |
| H  | -6.26438 | 0.00142  | -1.04475 |
| H  | -5.06594 | 4.10334  | -0.61285 |
| H  | -6.83430 | 2.41792  | -0.96609 |
| O  | 0.99627  | 0.62911  | 0.15051  |
| C  | 3.17941  | 1.04479  | -0.65067 |
| C  | 1.80903  | 0.74910  | -0.80557 |
| C  | 4.97818  | 1.79853  | 0.94722  |
| C  | 3.68266  | 1.38830  | 0.59354  |
| C  | 6.09081  | 1.87674  | 0.10108  |
| H  | 1.43281  | 0.63760  | -1.83986 |
| H  | 2.94382  | 1.38668  | 1.39984  |
| H  | 3.78777  | 1.06530  | -1.55532 |

---

|   |          |          |          |
|---|----------|----------|----------|
| C | 7.17152  | 2.88064  | 0.37693  |
| H | 5.91304  | 1.67512  | -0.95998 |
| H | 5.11652  | 2.13362  | 1.97672  |
| H | 6.87207  | 3.85995  | -0.02180 |
| H | 7.33514  | 3.00169  | 1.45525  |
| H | 8.12616  | 2.61518  | -0.09338 |
| C | 7.10666  | 0.06216  | 0.33460  |
| C | 7.54026  | 0.12188  | 1.65824  |
| C | 6.53069  | -0.39104 | 2.50796  |
| C | 5.50926  | -0.88055 | 1.73501  |
| C | 5.92866  | -0.87091 | 0.31038  |
| H | 7.78251  | 0.17152  | -0.51279 |
| H | 8.46576  | 0.58228  | 1.99527  |
| H | 6.55108  | -0.36178 | 3.59333  |
| H | 4.58601  | -1.32681 | 2.09532  |
| H | 6.31151  | -1.87769 | 0.05926  |
| H | 5.13053  | -0.65478 | -0.41072 |
| O | -3.43885 | -4.12943 | 1.94305  |
| C | -2.49223 | -4.57286 | 1.00947  |
| H | -1.68193 | -5.15039 | 1.48731  |
| H | -3.00647 | -5.25066 | 0.31944  |

Bottom, away, 1, endo, away

M06/lanl2dz-6-31G(d) Energy = -2646.116811

M06/lanl2dz-6-31G(d) Free Energy = -2645.478200

M06/def2-TZVP Derived free energy = -2646.588835

M06/def2-TZVP Derived free energy in solution (toluene) = -2646.620188

M06/def2-TZVP Derived free energy in solution (nitromethane) = -2646.645402

Number of Imaginary Frequencies = 1 (-385.43)

M06/lanl2dz-6-31G(d) Geometry

|   |          |          |          |
|---|----------|----------|----------|
| C | -3.84505 | -1.18455 | 1.15008  |
| C | -4.59684 | -2.34813 | 1.82582  |
| C | -2.79066 | -3.12131 | -0.08454 |
| N | -2.80393 | -1.79132 | 0.27467  |

---

|    |          |          |          |
|----|----------|----------|----------|
| C  | -1.73240 | -1.18910 | -0.29627 |
| N  | -1.12826 | -2.18781 | -0.95157 |
| N  | -1.76745 | -3.39872 | -0.83626 |
| C  | -3.74331 | -2.69462 | 3.06183  |
| C  | -3.16290 | -1.35465 | 3.41523  |
| C  | -3.25729 | -0.47274 | 2.33347  |
| C  | -2.88690 | 0.86121  | 2.45930  |
| C  | -2.33968 | 1.29051  | 3.66617  |
| C  | -2.20484 | 0.40295  | 4.73324  |
| C  | -2.63385 | -0.91843 | 4.62293  |
| C  | 0.08722  | -2.10434 | -1.69173 |
| C  | 1.27672  | -2.62058 | -1.10650 |
| C  | 2.48648  | -2.53620 | -1.85582 |
| C  | 2.46602  | -1.93281 | -3.13686 |
| C  | 1.30688  | -1.44325 | -3.67725 |
| C  | 0.10154  | -1.54257 | -2.94984 |
| C  | 1.30917  | -3.19981 | 0.18448  |
| C  | 2.48712  | -3.68460 | 0.69784  |
| C  | 3.68235  | -3.61757 | -0.04850 |
| C  | 3.67972  | -3.05118 | -1.29784 |
| H  | -4.48685 | -0.56419 | 0.51122  |
| H  | -5.55964 | -1.94883 | 2.16825  |
| H  | -2.95233 | -3.42244 | 2.81977  |
| H  | -4.34427 | -3.14039 | 3.86344  |
| H  | -3.04940 | 1.56986  | 1.64712  |
| H  | -2.03528 | 2.32948  | 3.77824  |
| H  | -1.78765 | 0.75528  | 5.67486  |
| H  | -2.56817 | -1.59283 | 5.47580  |
| H  | 3.39548  | -1.87448 | -3.70317 |
| H  | 1.28615  | -0.99292 | -4.66638 |
| Cl | -1.35206 | -0.95984 | -3.69116 |
| H  | 0.39372  | -3.25617 | 0.76969  |
| H  | 2.49761  | -4.13080 | 1.69035  |
| H  | 4.60570  | -4.01197 | 0.37260  |
| H  | 4.59541  | -2.99350 | -1.88772 |
| Au | -1.09185 | 0.86602  | -0.18091 |



---

|   |          |          |          |
|---|----------|----------|----------|
| C | -0.59463 | 2.85096  | 0.00520  |
| C | -1.49268 | 3.74806  | -0.59993 |
| C | 0.49263  | 3.31833  | 0.72644  |
| C | -1.26144 | 5.11811  | -0.49630 |
| C | 0.71244  | 4.69529  | 0.82598  |
| H | 1.16705  | 2.62599  | 1.22912  |
| C | -0.15783 | 5.58760  | 0.21062  |
| H | -1.94524 | 5.82952  | -0.95886 |
| H | 1.56454  | 5.06793  | 1.39265  |
| H | 0.01553  | 6.65924  | 0.28909  |
| C | -2.65542 | 1.70690  | -1.19880 |
| C | -3.67015 | 0.97512  | -1.79352 |
| C | -2.62361 | 3.11121  | -1.27149 |
| C | -4.69319 | 1.64684  | -2.46780 |
| H | -3.67374 | -0.11391 | -1.76309 |
| C | -3.65416 | 3.76170  | -1.95003 |
| C | -4.68176 | 3.03442  | -2.54196 |
| H | -5.49245 | 1.07782  | -2.93907 |
| H | -3.65431 | 4.84906  | -2.01965 |
| H | -5.47823 | 3.55689  | -3.06815 |
| O | 0.72045  | 0.14790  | 0.89418  |
| C | 3.04867  | -0.18094 | 0.90354  |
| C | 1.83280  | 0.19063  | 0.30864  |
| C | 5.48560  | -0.54094 | 0.63126  |
| C | 4.22257  | -0.12961 | 0.18125  |
| C | 6.62453  | -0.58807 | -0.18494 |
| H | 1.87869  | 0.54493  | -0.74318 |
| H | 4.15396  | 0.22080  | -0.85720 |
| H | 3.03286  | -0.54490 | 1.93175  |
| C | 7.67965  | -1.62776 | 0.06746  |
| H | 6.44722  | -0.36280 | -1.24335 |
| H | 5.55663  | -0.93746 | 1.64760  |
| H | 7.36285  | -2.59102 | -0.35791 |
| H | 8.64374  | -1.37155 | -0.38874 |
| H | 7.83561  | -1.78061 | 1.14308  |
| C | 7.65644  | 1.16884  | 0.09520  |

---

|   |          |          |          |
|---|----------|----------|----------|
| C | 8.07480  | 1.07105  | 1.42341  |
| C | 7.05130  | 1.55066  | 2.27593  |
| C | 6.04249  | 2.06531  | 1.50417  |
| C | 6.49853  | 2.12936  | 0.08936  |
| H | 8.34954  | 1.09183  | -0.74231 |
| H | 8.99803  | 0.60364  | 1.75725  |
| H | 7.05138  | 1.47862  | 3.35940  |
| H | 5.10616  | 2.48265  | 1.86488  |
| H | 5.72691  | 1.96655  | -0.66980 |
| H | 6.91139  | 3.13839  | -0.09111 |
| O | -4.92453 | -3.39471 | 0.94819  |
| C | -3.82756 | -4.07547 | 0.40292  |
| H | -4.20046 | -4.67950 | -0.43166 |
| H | -3.37374 | -4.77229 | 1.12880  |

M06/lanl2dz-6-31G(d) Energy = -2646.119554

M06/lanl2dz-6-31G(d) Free Energy = -2645.481060

M06/def2-TZVP Derived free energy = -2646.592952

M06/def2-TZVP Derived free energy in solution (toluene) = -2646.624538

M06/def2-TZVP Derived free energy in solution (nitromethane) = -2646.650402

Number of Imaginary Frequencies = 1 (-381.24)

M06/lanl2dz-6-31G(d) Geometry

|   |          |          |          |
|---|----------|----------|----------|
| C | -3.73115 | -1.29378 | 0.78538  |
| C | -4.92638 | -2.26797 | 0.74135  |
| C | -2.68501 | -2.95285 | -0.76957 |
| N | -2.70806 | -1.71283 | -0.17492 |
| C | -1.61192 | -1.02468 | -0.56850 |
| N | -0.98111 | -1.89186 | -1.37152 |
| N | -1.62990 | -3.09755 | -1.51339 |
| C | -5.56792 | -2.10521 | 2.11598  |
| C | -4.39488 | -1.77190 | 2.99859  |
| C | -3.31102 | -1.34027 | 2.23213  |
| C | -2.09858 | -1.00486 | 2.81783  |
| C | -1.98955 | -1.09364 | 4.20526  |
| C | -3.07345 | -1.50638 | 4.97711  |

---

|    |          |          |          |
|----|----------|----------|----------|
| C  | -4.28367 | -1.85271 | 4.37896  |
| C  | 0.28179  | -1.70222 | -2.00293 |
| C  | 1.41839  | -2.34631 | -1.44112 |
| C  | 2.67344  | -2.18701 | -2.09648 |
| C  | 2.74898  | -1.37840 | -3.25679 |
| C  | 1.64132  | -0.75524 | -3.76775 |
| C  | 0.39012  | -0.93131 | -3.13908 |
| C  | 1.35295  | -3.11987 | -0.25796 |
| C  | 2.48316  | -3.72031 | 0.23991  |
| C  | 3.72307  | -3.58409 | -0.41942 |
| C  | 3.81435  | -2.82976 | -1.56168 |
| H  | -4.05382 | -0.28170 | 0.49291  |
| H  | -5.60515 | -2.05797 | -0.10379 |
| H  | -6.09572 | -3.02325 | 2.40153  |
| H  | -6.30689 | -1.29020 | 2.09665  |
| H  | -1.23456 | -0.70204 | 2.22278  |
| H  | -1.04723 | -0.84144 | 4.68766  |
| H  | -2.97011 | -1.57145 | 6.05861  |
| H  | -5.12233 | -2.19349 | 4.98468  |
| H  | 3.71375  | -1.26075 | -3.75051 |
| H  | 1.69606  | -0.14039 | -4.66266 |
| Cl | -0.99972 | -0.16884 | -3.83975 |
| H  | 0.40159  | -3.23048 | 0.25979  |
| H  | 2.42069  | -4.31412 | 1.14966  |
| H  | 4.60736  | -4.07411 | -0.01465 |
| H  | 4.76844  | -2.71200 | -2.07729 |
| Au | -1.04899 | 1.00594  | -0.06934 |
| C  | -0.60107 | 2.94389  | 0.43870  |
| C  | -1.50469 | 3.90772  | -0.03949 |
| C  | 0.47889  | 3.31228  | 1.22426  |
| C  | -1.29473 | 5.24987  | 0.26820  |
| C  | 0.67842  | 4.66242  | 1.52722  |
| H  | 1.16302  | 2.56351  | 1.62158  |
| C  | -0.20303 | 5.62340  | 1.04702  |
| H  | -1.98285 | 6.01285  | -0.09502 |
| H  | 1.52378  | 4.95884  | 2.14637  |

---

|   |          |          |          |
|---|----------|----------|----------|
| H | -0.04474 | 6.67372  | 1.28446  |
| C | -2.59885 | 1.96756  | -0.99571 |
| C | -3.56218 | 1.32533  | -1.75664 |
| C | -2.60349 | 3.36458  | -0.83339 |
| C | -4.57621 | 2.07923  | -2.35435 |
| H | -3.53066 | 0.24856  | -1.91828 |
| C | -3.62502 | 4.09675  | -1.43640 |
| C | -4.60677 | 3.45782  | -2.18767 |
| H | -5.33539 | 1.58061  | -2.95416 |
| H | -3.65480 | 5.17999  | -1.32323 |
| H | -5.39659 | 4.04408  | -2.65302 |
| O | 0.73505  | 0.14784  | 0.96154  |
| C | 3.05395  | -0.24821 | 1.01191  |
| C | 1.87367  | 0.24090  | 0.43282  |
| C | 5.47948  | -0.68611 | 0.74242  |
| C | 4.25096  | -0.15118 | 0.33196  |
| C | 6.62028  | -0.71256 | -0.07048 |
| H | 1.97394  | 0.74352  | -0.55239 |
| H | 4.22671  | 0.34065  | -0.64946 |
| H | 2.99103  | -0.75031 | 1.97812  |
| C | 7.59488  | -1.84846 | 0.05437  |
| H | 6.47245  | -0.34392 | -1.09255 |
| H | 5.51070  | -1.20919 | 1.70194  |
| H | 7.20010  | -2.73190 | -0.46945 |
| H | 8.57382  | -1.61768 | -0.38305 |
| H | 7.74220  | -2.13103 | 1.10451  |
| C | 7.77345  | 0.93017  | 0.42434  |
| C | 8.16188  | 0.64221  | 1.73259  |
| C | 7.16221  | 1.09014  | 2.63068  |
| C | 6.20449  | 1.76548  | 1.92057  |
| C | 6.68243  | 1.96105  | 0.52526  |
| H | 8.46937  | 0.90094  | -0.41370 |
| H | 9.04401  | 0.07163  | 2.01286  |
| H | 7.14178  | 0.89002  | 3.69778  |
| H | 5.29669  | 2.20613  | 2.32348  |
| H | 5.91200  | 1.94083  | -0.25206 |

---

|   |          |          |          |
|---|----------|----------|----------|
| H | 7.16316  | 2.95413  | 0.46454  |
| C | -3.82033 | -3.89437 | -0.55215 |
| H | -4.52407 | -3.81845 | -1.40206 |
| H | -3.46033 | -4.92710 | -0.50672 |
| O | -4.45813 | -3.60244 | 0.66008  |

Top, towards, 1, endo, away

M06/lanl2dz-6-31G(d) Energy = -2646.113994

M06/lanl2dz-6-31G(d) Free Energy = -2645.476270

M06/def2-TZVP Derived free energy = -2646.585423

M06/def2-TZVP Derived free energy in solution (toluene) = -2646.616502

M06/def2-TZVP Derived free energy in solution (nitromethane) = -2646.641697

Number of Imaginary Frequencies = 1 (-382.04)

M06/lanl2dz-6-31G(d) Geometry

|   |          |          |          |
|---|----------|----------|----------|
| C | -2.79179 | -0.93040 | 2.34281  |
| C | -2.99457 | -1.90980 | 3.51417  |
| C | -2.20275 | -3.09545 | 1.18600  |
| N | -2.18430 | -1.71851 | 1.23616  |
| C | -1.51144 | -1.26230 | 0.14966  |
| N | -1.15308 | -2.38625 | -0.48321 |
| N | -1.57082 | -3.53728 | 0.14064  |
| C | -1.61469 | -1.96336 | 4.20231  |
| C | -1.11298 | -0.56431 | 3.97487  |
| C | -1.82266 | 0.05047  | 2.93594  |
| C | -1.61900 | 1.38796  | 2.61702  |
| C | -0.62796 | 2.09181  | 3.29930  |
| C | 0.11308  | 1.46953  | 4.30387  |
| C | -0.13616 | 0.14494  | 4.66255  |
| C | -0.32043 | -2.49551 | -1.63610 |
| C | 1.03717  | -2.86888 | -1.44157 |
| C | 1.86209  | -3.02738 | -2.59214 |
| C | 1.31049  | -2.79370 | -3.87532 |
| C | 0.00029  | -2.42986 | -4.03334 |
| C | -0.82777 | -2.29055 | -2.89906 |

---

|    |          |          |          |
|----|----------|----------|----------|
| C  | 1.59538  | -3.09024 | -0.15985 |
| C  | 2.90810  | -3.47092 | -0.02952 |
| C  | 3.72183  | -3.65088 | -1.16912 |
| C  | 3.20947  | -3.42390 | -2.42223 |
| H  | -3.72603 | -0.49503 | 1.96627  |
| H  | -3.70994 | -1.44442 | 4.20357  |
| H  | -0.95340 | -2.70722 | 3.72744  |
| H  | -1.69000 | -2.23936 | 5.26071  |
| H  | -2.23338 | 1.88749  | 1.86772  |
| H  | -0.44628 | 3.13695  | 3.05585  |
| H  | 0.87789  | 2.03380  | 4.83445  |
| H  | 0.41316  | -0.31837 | 5.48139  |
| H  | 1.94833  | -2.91594 | -4.74992 |
| H  | -0.42708 | -2.25863 | -5.01799 |
| Cl | -2.49281 | -1.87932 | -3.13854 |
| H  | 0.97038  | -2.98030 | 0.72593  |
| H  | 3.32296  | -3.64623 | 0.96179  |
| H  | 4.75341  | -3.97905 | -1.05121 |
| H  | 3.82765  | -3.55952 | -3.30921 |
| Au | -1.15213 | 0.78159  | -0.45882 |
| C  | -0.92844 | 2.76386  | -0.94140 |
| C  | -2.12222 | 3.44646  | -1.22931 |
| C  | 0.28778  | 3.42515  | -0.93418 |
| C  | -2.07287 | 4.80982  | -1.51233 |
| C  | 0.32370  | 4.79285  | -1.22033 |
| H  | 1.20570  | 2.88381  | -0.70814 |
| C  | -0.85150 | 5.47799  | -1.50774 |
| H  | -2.98621 | 5.35930  | -1.73992 |
| H  | 1.27538  | 5.32236  | -1.21908 |
| H  | -0.81946 | 6.54276  | -1.73099 |
| C  | -3.09944 | 1.25570  | -0.88333 |
| C  | -4.14489 | 0.34672  | -0.84091 |
| C  | -3.31933 | 2.60960  | -1.19649 |
| C  | -5.44599 | 0.78717  | -1.09929 |
| H  | -3.97186 | -0.70854 | -0.62974 |
| C  | -4.62542 | 3.02844  | -1.44839 |

---

|   |          |          |          |
|---|----------|----------|----------|
| C | -5.68111 | 2.12381  | -1.39718 |
| H | -6.27035 | 0.07707  | -1.06986 |
| H | -4.82244 | 4.07232  | -1.69113 |
| H | -6.69447 | 2.46616  | -1.59728 |
| O | 1.01853  | 0.57520  | -0.02157 |
| C | 2.74578  | 0.18322  | 1.54060  |
| C | 1.43527  | 0.05245  | 1.04656  |
| C | 4.97300  | 1.26574  | 1.36918  |
| C | 3.66937  | 1.01150  | 0.92868  |
| C | 5.80781  | 2.24647  | 0.81066  |
| H | 0.72928  | -0.55018 | 1.65299  |
| H | 3.31927  | 1.55180  | 0.04273  |
| H | 3.00007  | -0.34969 | 2.45702  |
| C | 6.84431  | 2.91622  | 1.66754  |
| H | 5.33193  | 2.89824  | 0.07005  |
| H | 5.33189  | 0.72210  | 2.24743  |
| H | 6.37190  | 3.70172  | 2.27319  |
| H | 7.30784  | 2.20176  | 2.36006  |
| H | 7.63729  | 3.39079  | 1.07701  |
| C | 6.94883  | 1.33714  | -0.64455 |
| C | 7.72561  | 0.44520  | 0.09584  |
| C | 7.01147  | -0.76443 | 0.27513  |
| C | 5.84584  | -0.69712 | -0.44302 |
| C | 5.87740  | 0.51351  | -1.30568 |
| H | 7.36477  | 2.23072  | -1.10923 |
| H | 8.68377  | 0.67923  | 0.55347  |
| H | 7.31984  | -1.58523 | 0.91598  |
| H | 5.06219  | -1.45042 | -0.48598 |
| H | 6.26129  | 0.21400  | -2.29767 |
| H | 4.91369  | 1.00171  | -1.48048 |
| O | -3.58586 | -3.12412 | 3.13539  |
| C | -2.82336 | -3.91582 | 2.26590  |
| H | -3.49835 | -4.66173 | 1.83124  |
| H | -2.03202 | -4.46910 | 2.80087  |

Bottom, towards, 1, endo, away

---

M06/lanl2dz-6-31G(d) Energy = -2646.115711  
M06/lanl2dz-6-31G(d) Free Energy = -2645.474883  
M06/def2-TZVP Derived free energy = -2646.584312  
M06/def2-TZVP Derived free energy in solution (toluene) = -2646.615274  
M06/def2-TZVP Derived free energy in solution (nitromethane) = -2646.639785  
Number of Imaginary Frequencies = 1 (-392.92)

M06/lanl2dz-6-31G(d) Geometry

|   |          |          |          |
|---|----------|----------|----------|
| C | -3.31852 | -0.74785 | 1.98797  |
| C | -3.84219 | -1.76084 | 3.02437  |
| C | -2.91963 | -2.88208 | 0.69871  |
| N | -2.69758 | -1.53518 | 0.89109  |
| C | -1.83945 | -1.10840 | -0.06668 |
| N | -1.58969 | -2.21522 | -0.77500 |
| N | -2.24949 | -3.33026 | -0.32044 |
| C | -2.61359 | -2.07814 | 3.90181  |
| C | -1.87659 | -0.76816 | 3.87135  |
| C | -2.30668 | 0.01415  | 2.79333  |
| C | -1.85137 | 1.31615  | 2.61907  |
| C | -0.89537 | 1.81189  | 3.50408  |
| C | -0.43794 | 1.02293  | 4.56046  |
| C | -0.93604 | -0.26436 | 4.76133  |
| C | -0.71164 | -2.31279 | -1.89472 |
| C | 0.58512  | -2.85850 | -1.70052 |
| C | 1.45813  | -2.92795 | -2.82409 |
| C | 1.00588  | -2.46025 | -4.08170 |
| C | -0.25225 | -1.94350 | -4.24248 |
| C | -1.12091 | -1.87425 | -3.13428 |
| C | 1.04297  | -3.32048 | -0.44423 |
| C | 2.30966  | -3.83196 | -0.31228 |
| C | 3.17679  | -3.90743 | -1.42463 |
| C | 2.75791  | -3.46219 | -2.65284 |
| H | -4.11107 | -0.13180 | 1.54469  |
| H | -4.58186 | -1.23403 | 3.64003  |
| H | -2.00554 | -2.88878 | 3.46876  |



---

|    |          |          |          |
|----|----------|----------|----------|
| H  | -2.89859 | -2.40095 | 4.91009  |
| H  | -2.25114 | 1.94894  | 1.82686  |
| H  | -0.52365 | 2.82765  | 3.38030  |
| H  | 0.29405  | 1.42907  | 5.25662  |
| H  | -0.60771 | -0.85566 | 5.61529  |
| H  | 1.67993  | -2.51958 | -4.93559 |
| H  | -0.60296 | -1.58842 | -5.20804 |
| Cl | -2.71482 | -1.23290 | -3.37111 |
| H  | 0.38046  | -3.27061 | 0.41833  |
| H  | 2.65019  | -4.18611 | 0.65916  |
| H  | 4.17417  | -4.32616 | -1.30356 |
| H  | 3.41457  | -3.51903 | -3.52065 |
| Au | -0.89123 | 0.80007  | -0.38181 |
| C  | -0.00219 | 2.63483  | -0.61136 |
| C  | -0.89052 | 3.69336  | -0.86896 |
| C  | 1.36004  | 2.86483  | -0.49384 |
| C  | -0.38974 | 4.98836  | -0.98837 |
| C  | 1.85014  | 4.16765  | -0.61945 |
| H  | 2.04893  | 2.03720  | -0.31601 |
| C  | 0.97682  | 5.22222  | -0.86144 |
| H  | -1.06091 | 5.82334  | -1.18836 |
| H  | 2.91970  | 4.35762  | -0.53080 |
| H  | 1.36161  | 6.23567  | -0.95864 |
| C  | -2.53517 | 1.90992  | -0.87264 |
| C  | -3.80723 | 1.38248  | -1.02126 |
| C  | -2.28850 | 3.28867  | -1.01100 |
| C  | -4.87373 | 2.24197  | -1.29969 |
| H  | -3.98492 | 0.31029  | -0.94385 |
| C  | -3.36771 | 4.12831  | -1.28515 |
| C  | -4.65063 | 3.60801  | -1.42522 |
| H  | -5.87573 | 1.83477  | -1.42208 |
| H  | -3.20709 | 5.20020  | -1.39831 |
| H  | -5.48185 | 4.27609  | -1.64170 |
| O  | 1.02767  | -0.18045 | 0.09937  |
| C  | 2.89900  | -0.41585 | 1.50070  |
| C  | 1.54253  | -0.13949 | 1.25049  |

---

|   |          |          |          |
|---|----------|----------|----------|
| C | 5.12904  | -0.98769 | 0.48978  |
| C | 3.74445  | -0.77345 | 0.45842  |
| C | 5.97729  | -0.75610 | 1.58133  |
| H | 0.90821  | 0.14670  | 2.11135  |
| H | 3.25304  | -0.91764 | -0.50833 |
| H | 3.24643  | -0.34121 | 2.53040  |
| C | 7.26254  | -1.51974 | 1.71137  |
| H | 5.49270  | -0.51404 | 2.53221  |
| H | 5.58666  | -1.36118 | -0.42874 |
| H | 7.99140  | -1.01372 | 2.35608  |
| H | 7.06206  | -2.50418 | 2.15693  |
| H | 7.72459  | -1.69108 | 0.73081  |
| C | 6.64238  | 1.21128  | 1.37495  |
| C | 5.35996  | 1.88647  | 0.97037  |
| C | 5.36616  | 1.71008  | -0.50324 |
| C | 6.63165  | 1.37548  | -0.91367 |
| C | 7.43378  | 1.14075  | 0.22786  |
| H | 7.06408  | 1.31439  | 2.37430  |
| H | 4.44361  | 1.55787  | 1.47543  |
| H | 4.52192  | 1.93881  | -1.14998 |
| H | 6.96084  | 1.27399  | -1.94352 |
| O | -4.53781 | -2.83861 | 2.45678  |
| C | -3.77297 | -3.67445 | 1.63011  |
| H | -3.13397 | -4.35612 | 2.21812  |
| H | -4.47152 | -4.29856 | 1.06220  |
| H | 8.48119  | 0.84994  | 0.20710  |
| H | 5.46577  | 2.96401  | 1.19160  |

Top, away, 2, endo, towards

M06/lanl2dz-6-31G(d) Energy = -2646.113970

M06/lanl2dz-6-31G(d) Free Energy = -2645.476454

M06/def2-TZVP Derived free energy = -2646.587363

M06/def2-TZVP Derived free energy in solution (toluene) = -2646.617844

M06/def2-TZVP Derived free energy in solution (nitromethane) = -2646.641761

Number of Imaginary Frequencies = 1 (-379.89)

---

M06/lanl2dz-6-31G(d) Geometry

|   |          |          |          |
|---|----------|----------|----------|
| C | 0.64396  | 3.02590  | -0.79298 |
| C | -0.08797 | 4.39974  | -0.57558 |
| C | 0.42995  | 2.74048  | 1.67458  |
| N | 0.56119  | 2.20128  | 0.42079  |
| C | 0.68036  | 0.86052  | 0.53289  |
| N | 0.61217  | 0.66243  | 1.86165  |
| N | 0.44416  | 1.82024  | 2.59096  |
| C | 0.94559  | 5.49664  | -0.91006 |
| C | 2.23312  | 4.77494  | -1.17230 |
| C | 2.06576  | 3.39384  | -1.11862 |
| C | 3.12884  | 2.52763  | -1.35650 |
| C | 4.37742  | 3.06778  | -1.64327 |
| C | 4.55174  | 4.45221  | -1.69371 |
| C | 3.48380  | 5.31268  | -1.46230 |
| C | 0.66470  | -0.59083 | 2.53674  |
| C | 1.80036  | -0.89733 | 3.33571  |
| C | 1.87372  | -2.18897 | 3.93363  |
| C | 0.81648  | -3.10786 | 3.73507  |
| C | -0.28482 | -2.77809 | 2.99061  |
| C | -0.35733 | -1.50392 | 2.39638  |
| C | 2.86469  | 0.01388  | 3.54102  |
| C | 3.95039  | -0.34653 | 4.30036  |
| C | 4.02838  | -1.62783 | 4.88770  |
| C | 3.00921  | -2.52733 | 4.70692  |
| H | 0.15362  | 2.44300  | -1.58291 |
| H | -0.94947 | 4.45184  | -1.24879 |
| H | 1.01219  | 6.21881  | -0.08330 |
| H | 0.62230  | 6.07580  | -1.78591 |
| H | 2.99218  | 1.44469  | -1.32398 |
| H | 5.22104  | 2.40822  | -1.83611 |
| H | 5.53410  | 4.86253  | -1.92004 |
| H | 3.62480  | 6.39194  | -1.50803 |
| H | 0.88769  | -4.09380 | 4.19285  |
| H | -1.10390 | -3.47799 | 2.84793  |

---

|    |          |          |          |
|----|----------|----------|----------|
| Cl | -1.79482 | -1.10570 | 1.48699  |
| H  | 2.80749  | 1.01031  | 3.10744  |
| H  | 4.75710  | 0.36699  | 4.45641  |
| H  | 4.89615  | -1.89567 | 5.48659  |
| H  | 3.05553  | -3.51833 | 5.15714  |
| Au | 0.71937  | -0.54593 | -1.13267 |
| C  | 0.69443  | -1.90237 | -2.66958 |
| C  | 1.70304  | -2.87992 | -2.62033 |
| C  | -0.24472 | -1.90027 | -3.68764 |
| C  | 1.73307  | -3.87481 | -3.59447 |
| C  | -0.20119 | -2.90181 | -4.66247 |
| H  | -1.00439 | -1.12156 | -3.74619 |
| C  | 0.77875  | -3.88584 | -4.60853 |
| H  | 2.50519  | -4.64342 | -3.57265 |
| H  | -0.93415 | -2.90471 | -5.46745 |
| H  | 0.80974  | -4.66448 | -5.36827 |
| C  | 2.42806  | -1.58382 | -0.70998 |
| C  | 3.29142  | -1.23818 | 0.31247  |
| C  | 2.66062  | -2.70094 | -1.53182 |
| C  | 4.40325  | -2.04602 | 0.56644  |
| H  | 3.11896  | -0.35367 | 0.92254  |
| C  | 3.77672  | -3.49168 | -1.26389 |
| C  | 4.63610  | -3.17020 | -0.21624 |
| H  | 5.08089  | -1.78530 | 1.37820  |
| H  | 3.98487  | -4.36416 | -1.88279 |
| H  | 5.50102  | -3.80019 | -0.01769 |
| O  | -1.17001 | 0.51098  | -1.72516 |
| C  | -3.51016 | 0.53184  | -1.40824 |
| C  | -2.26197 | -0.09017 | -1.53405 |
| C  | -5.93734 | 0.22954  | -0.96484 |
| C  | -4.62922 | -0.23488 | -1.13475 |
| C  | -7.04029 | -0.61807 | -0.77013 |
| H  | -2.25200 | -1.19553 | -1.45134 |
| H  | -4.47584 | -1.31956 | -1.06398 |
| H  | -3.57496 | 1.61701  | -1.49243 |
| C  | -8.39900 | -0.19510 | -1.25124 |

---

|   |          |          |          |
|---|----------|----------|----------|
| H | -6.82870 | -1.68769 | -0.88063 |
| H | -6.11470 | 1.30387  | -1.05714 |
| H | -9.21028 | -0.74787 | -0.76217 |
| H | -8.56181 | 0.87780  | -1.08754 |
| H | -8.48134 | -0.37821 | -2.33125 |
| C | -7.31914 | -0.81450 | 1.25009  |
| C | -7.70114 | 0.47367  | 1.63044  |
| C | -6.54723 | 1.24859  | 1.90115  |
| C | -5.44588 | 0.43751  | 1.82081  |
| C | -5.89049 | -0.97621 | 1.69579  |
| H | -8.01911 | -1.64963 | 1.23571  |
| H | -8.72009 | 0.85304  | 1.61763  |
| H | -6.53981 | 2.31674  | 2.09617  |
| H | -4.41004 | 0.74324  | 1.94596  |
| H | -5.25385 | -1.62471 | 1.08542  |
| H | -5.91014 | -1.41881 | 2.70798  |
| O | -0.66123 | 4.54853  | 0.70964  |
| C | 0.19520  | 4.20376  | 1.77179  |
| H | 1.14885  | 4.76006  | 1.73226  |
| H | -0.30783 | 4.45489  | 2.71017  |

M06/lanl2dz-6-31G(d) Energy = -2646.113678

M06/lanl2dz-6-31G(d) Free Energy = -2645.473363

M06/def2-TZVP Derived free energy = -2646.582670

M06/def2-TZVP Derived free energy in solution (toluene) = -2646.612880

M06/def2-TZVP Derived free energy in solution (nitromethane) = -2646.637110

Number of Imaginary Frequencies = 1 (-391.81)

M06/lanl2dz-6-31G(d) Geometry

|   |          |          |         |
|---|----------|----------|---------|
| C | -0.77186 | -0.19956 | 3.41218 |
| C | -1.73883 | 0.44293  | 4.44145 |
| C | -0.27909 | 2.11836  | 2.78083 |
| N | -0.53040 | 0.82820  | 2.37678 |
| C | -0.58102 | 0.79565  | 1.02696 |
| N | -0.33578 | 2.07601  | 0.69030 |
| N | -0.15466 | 2.91769  | 1.76584 |

---

|    |          |          |          |
|----|----------|----------|----------|
| C  | -3.12443 | 0.18921  | 3.83395  |
| C  | -2.93311 | -1.12984 | 3.14353  |
| C  | -1.57224 | -1.37138 | 2.93112  |
| C  | -1.12378 | -2.56080 | 2.36791  |
| C  | -2.07173 | -3.50711 | 1.98027  |
| C  | -3.43145 | -3.25782 | 2.16109  |
| C  | -3.87230 | -2.07356 | 2.75117  |
| C  | -0.39675 | 2.63026  | -0.62185 |
| C  | -1.55219 | 3.37558  | -0.98455 |
| C  | -1.64755 | 3.86114  | -2.32045 |
| C  | -0.58771 | 3.61424  | -3.22477 |
| C  | 0.53329  | 2.92674  | -2.84115 |
| C  | 0.62510  | 2.43774  | -1.52364 |
| C  | -2.61027 | 3.64149  | -0.08180 |
| C  | -3.71177 | 4.35097  | -0.49187 |
| C  | -3.81347 | 4.82315  | -1.81843 |
| C  | -2.80081 | 4.58209  | -2.71100 |
| H  | 0.20600  | -0.46775 | 3.83443  |
| H  | -1.63150 | -0.12960 | 5.37714  |
| H  | -3.34888 | 0.99793  | 3.11760  |
| H  | -3.92197 | 0.19357  | 4.58589  |
| H  | -0.05840 | -2.74381 | 2.22431  |
| H  | -1.74625 | -4.44198 | 1.52817  |
| H  | -4.15880 | -4.00570 | 1.85130  |
| H  | -4.93522 | -1.90108 | 2.91406  |
| H  | -0.67124 | 3.99122  | -4.24339 |
| H  | 1.35412  | 2.75040  | -3.53133 |
| Cl | 2.07959  | 1.59466  | -1.05784 |
| H  | -2.53924 | 3.29327  | 0.94767  |
| H  | -4.51303 | 4.55624  | 0.21540  |
| H  | -4.69329 | 5.38435  | -2.12556 |
| H  | -2.86421 | 4.94611  | -3.73586 |
| Au | -0.72330 | -0.98164 | -0.22159 |
| C  | -0.81070 | -2.65993 | -1.39787 |
| C  | -1.89001 | -2.70880 | -2.29620 |
| C  | 0.09897  | -3.70208 | -1.32384 |

---

|   |          |          |          |
|---|----------|----------|----------|
| C | -2.01024 | -3.79912 | -3.15528 |
| C | -0.03576 | -4.79480 | -2.18568 |
| H | 0.90992  | -3.68526 | -0.59504 |
| C | -1.07949 | -4.83339 | -3.10316 |
| H | -2.83692 | -3.85410 | -3.86332 |
| H | 0.67727  | -5.61606 | -2.13437 |
| H | -1.17923 | -5.68213 | -3.77710 |
| C | -2.50383 | -0.66016 | -1.16662 |
| C | -3.33470 | 0.40232  | -0.86683 |
| C | -2.82230 | -1.59143 | -2.17104 |
| C | -4.50107 | 0.58498  | -1.61478 |
| H | -3.08953 | 1.10165  | -0.07007 |
| C | -3.99196 | -1.39310 | -2.90306 |
| C | -4.81952 | -0.30667 | -2.63181 |
| H | -5.15402 | 1.42782  | -1.39336 |
| H | -4.26536 | -2.09591 | -3.68975 |
| H | -5.72703 | -0.16324 | -3.21517 |
| O | 1.32771  | -1.39468 | 0.65689  |
| C | 3.65766  | -1.33384 | 0.25871  |
| C | 2.30927  | -1.40181 | -0.13025 |
| C | 6.02887  | -1.21996 | -0.58948 |
| C | 4.63506  | -1.31892 | -0.72259 |
| C | 6.73679  | -1.06965 | 0.61011  |
| H | 2.12184  | -1.46375 | -1.22091 |
| H | 4.26894  | -1.41312 | -1.75072 |
| H | 3.88756  | -1.29512 | 1.32392  |
| C | 8.13643  | -1.60005 | 0.72315  |
| H | 6.15102  | -1.12994 | 1.53275  |
| H | 6.61409  | -1.30713 | -1.50611 |
| H | 8.10483  | -2.67821 | 0.93287  |
| H | 8.68882  | -1.46388 | -0.21521 |
| H | 8.70272  | -1.12508 | 1.53355  |
| C | 7.02076  | 0.98147  | 0.86151  |
| C | 7.88986  | 1.29195  | -0.18420 |
| C | 7.14028  | 1.59991  | -1.34467 |
| C | 5.80728  | 1.60166  | -1.02187 |

---

|   |          |         |          |
|---|----------|---------|----------|
| C | 5.66122  | 1.47532 | 0.45011  |
| H | 7.33947  | 0.95079 | 1.90290  |
| H | 8.97315  | 1.20955 | -0.14355 |
| H | 7.55714  | 1.76917 | -2.33313 |
| H | 4.98061  | 1.80190 | -1.69971 |
| H | 5.52666  | 2.48756 | 0.87219  |
| H | 4.80035  | 0.88553 | 0.78624  |
| O | -1.54803 | 1.81628 | 4.71411  |
| C | -0.35417 | 2.39444 | 4.23866  |
| H | 0.53161  | 1.99305 | 4.76186  |
| H | -0.40624 | 3.47006 | 4.42848  |

Bottom, away, 2, endo, toward

M06/lanl2dz-6-31G(d) Energy = -2646.116486

M06/lanl2dz-6-31G(d) Free Energy = -2645.479990

M06/def2-TZVP Derived free energy = -2646.591415

M06/def2-TZVP Derived free energy in solution (toluene) = -2646.621836

M06/def2-TZVP Derived free energy in solution (nitromethane) = -2646.646326

Number of Imaginary Frequencies = 1 (-368.67)

M06/lanl2dz-6-31G(d) Geometry

|   |          |         |          |
|---|----------|---------|----------|
| C | -0.55431 | 3.14955 | -0.19132 |
| C | -0.32228 | 4.46281 | -0.96996 |
| C | -1.45937 | 2.36325 | -2.39337 |
| N | -1.04883 | 2.11371 | -1.10578 |
| C | -1.16424 | 0.78793 | -0.86503 |
| N | -1.64503 | 0.30830 | -2.02398 |
| N | -1.83257 | 1.27081 | -2.98940 |
| C | -0.44169 | 5.54453 | 0.09812  |
| C | -1.41067 | 4.94724 | 1.08219  |
| C | -1.50547 | 3.56636 | 0.90194  |
| C | -2.33865 | 2.79435 | 1.69967  |
| C | -3.08697 | 3.42851 | 2.68999  |
| C | -2.99244 | 4.80622 | 2.87484  |
| C | -2.15240 | 5.57557 | 2.07218  |



---

|    |          |          |          |
|----|----------|----------|----------|
| C  | -1.91912 | -1.05887 | -2.31783 |
| C  | -3.26792 | -1.48316 | -2.46886 |
| C  | -3.51739 | -2.87539 | -2.63796 |
| C  | -2.42789 | -3.77659 | -2.69119 |
| C  | -1.13431 | -3.33815 | -2.59131 |
| C  | -0.88519 | -1.96501 | -2.40531 |
| C  | -4.36637 | -0.59078 | -2.42479 |
| C  | -5.65080 | -1.06586 | -2.52600 |
| C  | -5.90116 | -2.44664 | -2.68035 |
| C  | -4.85376 | -3.32964 | -2.73972 |
| H  | 0.39512  | 2.77014  | 0.21678  |
| H  | 0.64328  | 4.46231  | -1.50587 |
| H  | -0.78121 | 6.48641  | -0.35004 |
| H  | 0.53882  | 5.73222  | 0.56107  |
| H  | -2.42246 | 1.71514  | 1.56162  |
| H  | -3.74994 | 2.84067  | 3.32167  |
| H  | -3.58468 | 5.28748  | 3.65081  |
| H  | -2.08874 | 6.65388  | 2.21262  |
| H  | -2.63310 | -4.83835 | -2.82273 |
| H  | -0.29428 | -4.02517 | -2.65053 |
| Cl | 0.77532  | -1.44306 | -2.30443 |
| H  | -4.18737 | 0.47773  | -2.32329 |
| H  | -6.48576 | -0.36855 | -2.49545 |
| H  | -6.92528 | -2.80467 | -2.76025 |
| H  | -5.03117 | -4.39708 | -2.86666 |
| Au | -0.46438 | -0.27619 | 0.90112  |
| C  | 0.21248  | -1.33198 | 2.52670  |
| C  | -0.70024 | -2.26083 | 3.05627  |
| C  | 1.47081  | -1.17928 | 3.08534  |
| C  | -0.31408 | -3.05804 | 4.13118  |
| C  | 1.84524  | -1.98048 | 4.16836  |
| H  | 2.16358  | -0.43061 | 2.70218  |
| C  | 0.95792  | -2.91975 | 4.67993  |
| H  | -1.00722 | -3.78422 | 4.55540  |
| H  | 2.83078  | -1.86064 | 4.61587  |
| H  | 1.25116  | -3.54202 | 5.52341  |

---

|   |          |          |          |
|---|----------|----------|----------|
| C | -2.17054 | -1.28411 | 1.40266  |
| C | -3.38576 | -1.08025 | 0.77704  |
| C | -2.01600 | -2.23807 | 2.42386  |
| C | -4.47735 | -1.87863 | 1.12868  |
| H | -3.50997 | -0.31550 | 0.01404  |
| C | -3.11771 | -3.02165 | 2.76337  |
| C | -4.33655 | -2.84972 | 2.11216  |
| H | -5.42921 | -1.73478 | 0.61833  |
| H | -3.02718 | -3.77093 | 3.54947  |
| H | -5.18520 | -3.47370 | 2.38589  |
| O | 1.49412  | 0.73280  | 0.44265  |
| C | 3.65390  | 0.54828  | -0.48932 |
| C | 2.47500  | 0.03542  | 0.06944  |
| C | 5.86644  | 0.04363  | -1.49990 |
| C | 4.66417  | -0.31264 | -0.87880 |
| C | 6.79688  | -0.89007 | -1.98296 |
| H | 2.42276  | -1.06564 | 0.18599  |
| H | 4.48655  | -1.38440 | -0.72272 |
| H | 3.74890  | 1.62584  | -0.62711 |
| C | 7.64814  | -0.54818 | -3.17250 |
| H | 6.47264  | -1.93581 | -1.93713 |
| H | 6.04918  | 1.10468  | -1.68785 |
| H | 7.96994  | 0.50052  | -3.14166 |
| H | 8.53981  | -1.18237 | -3.24734 |
| H | 7.06784  | -0.68732 | -4.09484 |
| C | 8.19561  | -1.19036 | -0.50846 |
| C | 8.83155  | 0.05013  | -0.44004 |
| C | 8.12451  | 0.89594  | 0.44916  |
| C | 7.12322  | 0.17133  | 1.03992  |
| C | 7.29090  | -1.26488 | 0.69192  |
| H | 8.68052  | -2.07315 | -0.92453 |
| H | 9.67915  | 0.35305  | -1.05001 |
| H | 8.32199  | 1.95280  | 0.60148  |
| H | 6.39002  | 0.54751  | 1.74821  |
| H | 7.86418  | -1.74821 | 1.50354  |
| H | 6.36725  | -1.84115 | 0.57902  |

---

|   |          |         |          |
|---|----------|---------|----------|
| O | -1.37644 | 4.67432 | -1.89176 |
| C | -1.38161 | 3.74732 | -2.94077 |
| H | -0.47219 | 3.84198 | -3.56330 |
| H | -2.24651 | 3.96027 | -3.57728 |

M06/lanl2dz-6-31G(d) Energy = -2646.113547

M06/lanl2dz-6-31G(d) Free Energy = -2645.475886

M06/def2-TZVP Derived free energy = -2646.585819

M06/def2-TZVP Derived free energy in solution (toluene) = -2646.615674

M06/def2-TZVP Derived free energy in solution (nitromethane) = -2646.639410

Number of Imaginary Frequencies = 1 (-384.83)

M06/lanl2dz-6-31G(d) Geometry

|   |          |          |          |
|---|----------|----------|----------|
| C | 0.14458  | 2.79731  | 1.37319  |
| C | -0.07972 | 4.29437  | 1.65423  |
| C | -1.13145 | 3.39713  | -0.71697 |
| N | -0.67188 | 2.45595  | 0.17616  |
| C | -1.01893 | 1.22933  | -0.28206 |
| N | -1.66565 | 1.49972  | -1.42731 |
| N | -1.74665 | 2.84085  | -1.71709 |
| C | -1.38212 | 4.33582  | 2.47807  |
| C | -1.29195 | 3.04426  | 3.24228  |
| C | -0.38279 | 2.17390  | 2.63076  |
| C | -0.04573 | 0.95780  | 3.21359  |
| C | -0.69145 | 0.58114  | 4.38923  |
| C | -1.63041 | 1.42692  | 4.97831  |
| C | -1.92316 | 2.67112  | 4.42138  |
| C | -2.21000 | 0.54459  | -2.33532 |
| C | -3.62092 | 0.46836  | -2.50005 |
| C | -4.14450 | -0.56420 | -3.33117 |
| C | -3.25477 | -1.45194 | -3.98109 |
| C | -1.89798 | -1.33242 | -3.83965 |
| C | -1.37675 | -0.31903 | -3.01262 |
| C | -4.52280 | 1.35212  | -1.85886 |

---

|    |          |          |          |
|----|----------|----------|----------|
| C  | -5.87742 | 1.20723  | -2.02932 |
| C  | -6.39821 | 0.17900  | -2.84407 |
| C  | -5.54634 | -0.68503 | -3.48232 |
| H  | 1.18174  | 2.53587  | 1.13258  |
| H  | 0.74682  | 4.62505  | 2.29580  |
| H  | -2.27218 | 4.35302  | 1.82879  |
| H  | -1.43898 | 5.22562  | 3.11625  |
| H  | 0.72695  | 0.32306  | 2.77792  |
| H  | -0.44995 | -0.37166 | 4.85631  |
| H  | -2.12338 | 1.12262  | 5.89971  |
| H  | -2.62684 | 3.34262  | 4.91169  |
| H  | -3.66748 | -2.23722 | -4.61324 |
| H  | -1.21154 | -2.00033 | -4.35331 |
| Cl | 0.35656  | -0.17722 | -2.89293 |
| H  | -4.13476 | 2.16084  | -1.24315 |
| H  | -6.55840 | 1.89866  | -1.53680 |
| H  | -7.47438 | 0.08050  | -2.96846 |
| H  | -5.93296 | -1.47940 | -4.11986 |
| Au | -0.46249 | -0.69866 | 0.55021  |
| C  | 0.08969  | -2.53434 | 1.28945  |
| C  | -0.94861 | -3.47692 | 1.38678  |
| C  | 1.38078  | -2.86451 | 1.66884  |
| C  | -0.65921 | -4.76728 | 1.82449  |
| C  | 1.65882  | -4.16068 | 2.11431  |
| H  | 2.18024  | -2.12360 | 1.63333  |
| C  | 0.64358  | -5.10739 | 2.17934  |
| H  | -1.45059 | -5.51237 | 1.90366  |
| H  | 2.67182  | -4.42556 | 2.41347  |
| H  | 0.86258  | -6.11692 | 2.52212  |
| C  | -2.29576 | -1.58328 | 0.71945  |
| C  | -3.48321 | -0.91204 | 0.50147  |
| C  | -2.26965 | -2.94624 | 1.06321  |
| C  | -4.68668 | -1.61987 | 0.56319  |
| H  | -3.50126 | 0.15102  | 0.27472  |
| C  | -3.48062 | -3.63418 | 1.12181  |
| C  | -4.67990 | -2.97669 | 0.86094  |

---

|   |          |          |          |
|---|----------|----------|----------|
| H | -5.62333 | -1.09780 | 0.37118  |
| H | -3.49043 | -4.69194 | 1.38372  |
| H | -5.61681 | -3.52877 | 0.90471  |
| O | 1.62891  | 0.14815  | 0.38626  |
| C | 3.70285  | 0.19402  | -0.73228 |
| C | 2.47793  | -0.38899 | -0.37172 |
| C | 5.81694  | -0.09309 | -2.06760 |
| C | 4.56527  | -0.49076 | -1.57292 |
| C | 6.47680  | 1.10613  | -1.77146 |
| H | 2.26202  | -1.39080 | -0.79447 |
| H | 4.20956  | -1.46580 | -1.92221 |
| H | 3.91942  | 1.19465  | -0.35649 |
| C | 7.41318  | 1.71217  | -2.77502 |
| H | 5.92167  | 1.83197  | -1.16959 |
| H | 6.29566  | -0.76213 | -2.78410 |
| H | 8.12389  | 2.41383  | -2.32160 |
| H | 7.97827  | 0.93832  | -3.30982 |
| H | 6.83385  | 2.27107  | -3.52316 |
| C | 7.75341  | 0.68681  | -0.16373 |
| C | 8.69088  | -0.15943 | -0.75275 |
| C | 8.24177  | -1.49958 | -0.66112 |
| C | 7.08932  | -1.52792 | 0.07987  |
| C | 6.84827  | -0.18426 | 0.66321  |
| H | 7.97638  | 1.71892  | 0.10437  |
| H | 9.57981  | 0.16536  | -1.28789 |
| H | 8.71907  | -2.35409 | -1.13157 |
| H | 6.50486  | -2.41110 | 0.32263  |
| H | 5.79531  | 0.11234  | 0.72972  |
| H | 7.23601  | -0.18170 | 1.69783  |
| C | -0.97789 | 4.85837  | -0.46371 |
| H | -0.66340 | 5.36818  | -1.38088 |
| H | -1.95677 | 5.28144  | -0.17723 |
| O | -0.00128 | 5.10692  | 0.51056  |

---

Top, towards, 2, endo, towards

M06/lanl2dz-6-31G(d) Energy = -2646.110778

M06/lanl2dz-6-31G(d) Free Energy = -2645.475430

M06/def2-TZVP Derived free energy = -2646.586242

M06/def2-TZVP Derived free energy in solution (toluene) = -2646.617192

M06/def2-TZVP Derived free energy in solution (nitromethane) = -2646.642700

Number of Imaginary Frequencies = 1 (-373.49)

M06/lanl2dz-6-31G(d) Geometry

|   |          |          |          |
|---|----------|----------|----------|
| C | 0.50995  | 2.86755  | 0.35419  |
| C | 1.01877  | 4.24217  | -0.13632 |
| C | -0.84801 | 2.97442  | -1.74449 |
| N | -0.40162 | 2.29082  | -0.63735 |
| C | -0.89822 | 1.03143  | -0.67711 |
| N | -1.61378 | 1.02482  | -1.81488 |
| N | -1.59475 | 2.22133  | -2.49260 |
| C | 1.38206  | 4.98079  | 1.14716  |
| C | 0.44771  | 4.38664  | 2.16443  |
| C | -0.08093 | 3.17830  | 1.70619  |
| C | -0.96269 | 2.44105  | 2.48586  |
| C | -1.31596 | 2.93574  | 3.74030  |
| C | -0.78941 | 4.14118  | 4.20004  |
| C | 0.09706  | 4.87507  | 3.41486  |
| C | -2.33700 | -0.08174 | -2.35111 |
| C | -3.75772 | -0.02065 | -2.39631 |
| C | -4.46388 | -1.17770 | -2.83582 |
| C | -3.73832 | -2.32399 | -3.23802 |
| C | -2.36948 | -2.34324 | -3.22418 |
| C | -1.66522 | -1.20697 | -2.77939 |
| C | -4.49683 | 1.12015  | -1.99933 |
| C | -5.86919 | 1.10505  | -2.03065 |
| C | -6.57049 | -0.04338 | -2.45587 |
| C | -5.87862 | -1.15880 | -2.85233 |
| H | 1.35527  | 2.16845  | 0.43554  |
| H | 1.85766  | 4.13931  | -0.84785 |

---

|    |          |          |          |
|----|----------|----------|----------|
| H  | 1.26430  | 6.06240  | 1.00773  |
| H  | 2.43454  | 4.79505  | 1.40973  |
| H  | -1.39010 | 1.50206  | 2.13120  |
| H  | -2.01144 | 2.37537  | 4.36173  |
| H  | -1.07978 | 4.51658  | 5.17942  |
| H  | 0.49817  | 5.82243  | 3.77305  |
| H  | -4.29070 | -3.20274 | -3.56880 |
| H  | -1.80929 | -3.21756 | -3.54511 |
| Cl | 0.07517  | -1.27510 | -2.79050 |
| H  | -3.97100 | 2.01940  | -1.68603 |
| H  | -6.42352 | 1.99235  | -1.73057 |
| H  | -7.65806 | -0.03703 | -2.47406 |
| H  | -6.40583 | -2.05138 | -3.18755 |
| Au | -0.48968 | -0.68678 | 0.60894  |
| C  | -0.15192 | -2.41791 | 1.66513  |
| C  | -1.30152 | -3.01698 | 2.20932  |
| C  | 1.08939  | -3.01857 | 1.80248  |
| C  | -1.17991 | -4.21235 | 2.91352  |
| C  | 1.19794  | -4.21852 | 2.51164  |
| H  | 1.98169  | -2.57805 | 1.35961  |
| C  | 0.06890  | -4.80735 | 3.06753  |
| H  | -2.06006 | -4.68898 | 3.34467  |
| H  | 2.17237  | -4.69088 | 2.62579  |
| H  | 0.15741  | -5.74062 | 3.62042  |
| C  | -2.40096 | -1.10491 | 1.21112  |
| C  | -3.48149 | -0.28356 | 0.94458  |
| C  | -2.54014 | -2.28634 | 1.96046  |
| C  | -4.75122 | -0.66019 | 1.39059  |
| H  | -3.36480 | 0.65044  | 0.39877  |
| C  | -3.81469 | -2.64205 | 2.39923  |
| C  | -4.91313 | -1.83814 | 2.10845  |
| H  | -5.60626 | -0.02247 | 1.17192  |
| H  | -3.95342 | -3.55452 | 2.97834  |
| H  | -5.90179 | -2.13265 | 2.45515  |
| O  | 1.69828  | -0.34701 | 0.21370  |
| C  | 3.83980  | -0.24375 | 1.21117  |

---

|   |          |          |          |
|---|----------|----------|----------|
| C | 2.44792  | -0.05448 | 1.18957  |
| C | 5.85634  | -1.23209 | 0.16413  |
| C | 4.49828  | -0.90365 | 0.18513  |
| C | 6.44171  | -2.05193 | -0.81351 |
| H | 1.98717  | 0.37727  | 2.10033  |
| H | 3.87580  | -1.24521 | -0.64900 |
| H | 4.38628  | 0.08388  | 2.09509  |
| C | 7.62353  | -2.90844 | -0.45967 |
| H | 5.74057  | -2.50390 | -1.52382 |
| H | 6.47567  | -0.90362 | 1.00328  |
| H | 8.19142  | -3.22939 | -1.34146 |
| H | 8.30570  | -2.38294 | 0.22063  |
| H | 7.27948  | -3.81554 | 0.05595  |
| C | 7.21492  | -0.81697 | -2.27500 |
| C | 8.22372  | -0.13979 | -1.59047 |
| C | 7.68015  | 1.00734  | -0.96004 |
| C | 6.36949  | 1.13334  | -1.33526 |
| C | 6.07335  | 0.15322  | -2.41400 |
| H | 7.42339  | -1.57847 | -3.02580 |
| H | 9.24646  | -0.49049 | -1.47566 |
| H | 8.20970  | 1.64956  | -0.26284 |
| H | 5.67445  | 1.89555  | -0.99415 |
| H | 5.06352  | -0.26948 | -2.41163 |
| H | 6.19721  | 0.66442  | -3.38586 |
| O | -0.03376 | 4.95909  | -0.74935 |
| C | -0.43629 | 4.38984  | -1.96508 |
| H | -1.27512 | 4.97648  | -2.35317 |
| H | 0.37828  | 4.42878  | -2.71201 |

M06/lanl2dz-6-31G(d) Energy = -2646.109971

M06/lanl2dz-6-31G(d) Free Energy = -2645.473176

M06/def2-TZVP Derived free energy = -2646.584594

M06/def2-TZVP Derived free energy in solution (toluene) = -2646.615405

M06/def2-TZVP Derived free energy in solution (nitromethane) = -2646.640403

Number of Imaginary Frequencies = 1 (-391.46)



---

M06/lanl2dz-6-31G(d) Geometry

|    |          |          |          |
|----|----------|----------|----------|
| C  | -1.36251 | -2.25644 | 0.24005  |
| C  | -1.91462 | -3.68813 | 0.06641  |
| C  | 0.24534  | -3.07000 | -1.52717 |
| N  | -0.14298 | -2.14020 | -0.58947 |
| C  | 0.75394  | -1.12755 | -0.59352 |
| N  | 1.64769  | -1.51639 | -1.51523 |
| N  | 1.35068  | -2.71602 | -2.11216 |
| C  | -1.20468 | -4.52637 | 1.14406  |
| C  | -0.95881 | -3.50916 | 2.21974  |
| C  | -1.05923 | -2.21013 | 1.71145  |
| C  | -0.89295 | -1.10561 | 2.53930  |
| C  | -0.59503 | -1.31238 | 3.88367  |
| C  | -0.48443 | -2.60757 | 4.38873  |
| C  | -0.67371 | -3.71361 | 3.56362  |
| C  | 2.80564  | -0.77769 | -1.90113 |
| C  | 4.08012  | -1.21854 | -1.45452 |
| C  | 5.20748  | -0.39257 | -1.73030 |
| C  | 5.02483  | 0.81347  | -2.44795 |
| C  | 3.79073  | 1.19382  | -2.90473 |
| C  | 2.67176  | 0.38182  | -2.63319 |
| C  | 4.27089  | -2.42372 | -0.73705 |
| C  | 5.52526  | -2.78857 | -0.31502 |
| C  | 6.64339  | -1.96942 | -0.58178 |
| C  | 6.48454  | -0.79664 | -1.27433 |
| H  | -2.05752 | -1.48489 | -0.11454 |
| H  | -2.98489 | -3.64740 | 0.30724  |
| H  | -0.25364 | -4.94038 | 0.77374  |
| H  | -1.81191 | -5.38044 | 1.46723  |
| H  | -0.99757 | -0.09137 | 2.15068  |
| H  | -0.45539 | -0.45915 | 4.54410  |
| H  | -0.25812 | -2.75560 | 5.44300  |
| H  | -0.60184 | -4.72233 | 3.96845  |
| H  | 5.89375  | 1.43924  | -2.64809 |
| H  | 3.65182  | 2.10946  | -3.47362 |
| Cl | 1.12282  | 0.88724  | -3.24103 |

---

|    |          |          |          |
|----|----------|----------|----------|
| H  | 3.41769  | -3.06971 | -0.53874 |
| H  | 5.66148  | -3.72413 | 0.22429  |
| H  | 7.63012  | -2.27561 | -0.24099 |
| H  | 7.34005  | -0.15785 | -1.49135 |
| Au | 0.66807  | 0.90466  | 0.18641  |
| C  | 0.75933  | 2.91235  | 0.61578  |
| C  | 1.91436  | 3.31934  | 1.30700  |
| C  | -0.16215 | 3.84632  | 0.17055  |
| C  | 2.10797  | 4.67278  | 1.57295  |
| C  | 0.04364  | 5.20259  | 0.44167  |
| H  | -1.03474 | 3.54591  | -0.40897 |
| C  | 1.17070  | 5.60910  | 1.14535  |
| H  | 2.99665  | 5.00687  | 2.10791  |
| H  | -0.67743 | 5.93910  | 0.09100  |
| H  | 1.32993  | 6.66532  | 1.35428  |
| C  | 2.41343  | 0.95328  | 1.24157  |
| C  | 3.12568  | -0.18630 | 1.56709  |
| C  | 2.81680  | 2.22988  | 1.66795  |
| C  | 4.30817  | -0.05769 | 2.30066  |
| H  | 2.78182  | -1.17304 | 1.26291  |
| C  | 4.00067  | 2.33502  | 2.39646  |
| C  | 4.74412  | 1.19880  | 2.70274  |
| H  | 4.88139  | -0.94758 | 2.55462  |
| H  | 4.34287  | 3.31161  | 2.73805  |
| H  | 5.66679  | 1.29686  | 3.27154  |
| O  | -1.37706 | 0.88429  | -0.76730 |
| C  | -3.69456 | 1.27594  | -0.72878 |
| C  | -2.39469 | 1.36058  | -0.20354 |
| C  | -6.10782 | 1.90464  | -0.41772 |
| C  | -4.75576 | 1.84550  | -0.04532 |
| C  | -6.65762 | 1.36208  | -1.58631 |
| H  | -2.28082 | 1.88856  | 0.76649  |
| H  | -4.50351 | 2.34282  | 0.89699  |
| H  | -3.81163 | 0.79924  | -1.70316 |
| C  | -7.86404 | 1.99753  | -2.21201 |
| H  | -5.94994 | 0.92897  | -2.29974 |

---

|   |          |          |          |
|---|----------|----------|----------|
| H | -6.77254 | 2.47534  | 0.23216  |
| H | -7.54928 | 2.85966  | -2.81644 |
| H | -8.40530 | 1.31351  | -2.87696 |
| H | -8.56033 | 2.36905  | -1.44973 |
| C | -7.36573 | -0.53812 | -1.06934 |
| C | -8.44124 | -0.22548 | -0.24010 |
| C | -7.98759 | -0.10099 | 1.09585  |
| C | -6.66171 | -0.44367 | 1.14494  |
| C | -6.24978 | -0.99622 | -0.17077 |
| H | -7.49223 | -0.91798 | -2.08249 |
| H | -9.45164 | -0.01083 | -0.57897 |
| H | -8.58845 | 0.24192  | 1.93289  |
| H | -6.03280 | -0.44300 | 2.03097  |
| H | -5.22778 | -0.74964 | -0.48289 |
| H | -6.30280 | -2.09860 | -0.11486 |
| C | -0.55765 | -4.30178 | -1.77344 |
| H | -0.65506 | -4.47222 | -2.85093 |
| H | -0.04237 | -5.18072 | -1.35018 |
| O | -1.85585 | -4.15893 | -1.25575 |

M06/lanl2dz-6-31G(d) Energy = -2646.111477

M06/lanl2dz-6-31G(d) Free Energy = -2645.472980

M06/def2-TZVP Derived free energy = -2646.582211

M06/def2-TZVP Derived free energy in solution (toluene) = -2646.612912

M06/def2-TZVP Derived free energy in solution (nitromethane) = -2646.637682

Number of Imaginary Frequencies = 1 (-388.10)

M06/lanl2dz-6-31G(d) Geometry

|   |          |          |          |
|---|----------|----------|----------|
| C | -1.75958 | -1.52861 | 0.97004  |
| C | -2.63946 | -2.79264 | 1.06801  |
| C | -0.79668 | -2.81082 | -0.97727 |
| N | -0.76064 | -1.75338 | -0.09843 |
| C | 0.32476  | -0.99510 | -0.38567 |
| N | 0.89559  | -1.65528 | -1.40387 |
| N | 0.21436  | -2.78218 | -1.79289 |
| C | -1.91564 | -3.71861 | 2.05952  |

---

|    |          |          |          |
|----|----------|----------|----------|
| C  | -1.20702 | -2.73338 | 2.94360  |
| C  | -1.12846 | -1.47723 | 2.33298  |
| C  | -0.53095 | -0.40374 | 2.98304  |
| C  | 0.02191  | -0.60619 | 4.24448  |
| C  | -0.04673 | -1.86076 | 4.84959  |
| C  | -0.66884 | -2.92946 | 4.20872  |
| C  | 2.09825  | -1.27622 | -2.07082 |
| C  | 3.29168  | -1.99011 | -1.78021 |
| C  | 4.50658  | -1.52577 | -2.36123 |
| C  | 4.47737  | -0.40558 | -3.22581 |
| C  | 3.30732  | 0.24558  | -3.51445 |
| C  | 2.10567  | -0.19727 | -2.92686 |
| C  | 3.32775  | -3.11271 | -0.91861 |
| C  | 4.51948  | -3.73357 | -0.63732 |
| C  | 5.72675  | -3.26754 | -1.20065 |
| C  | 5.71640  | -2.18946 | -2.04800 |
| H  | -2.33850 | -0.63733 | 0.68939  |
| H  | -3.59501 | -2.48239 | 1.51326  |
| H  | -1.19437 | -4.37486 | 1.54748  |
| H  | -2.61298 | -4.37574 | 2.59272  |
| H  | -0.49187 | 0.58474  | 2.52292  |
| H  | 0.50127  | 0.22137  | 4.76311  |
| H  | 0.38216  | -2.00307 | 5.83974  |
| H  | -0.73483 | -3.90214 | 4.69463  |
| H  | 5.41243  | -0.05988 | -3.66513 |
| H  | 3.28341  | 1.10342  | -4.18143 |
| Cl | 0.63972  | 0.66238  | -3.29190 |
| H  | 2.40068  | -3.49055 | -0.49038 |
| H  | 4.53333  | -4.60007 | 0.02122  |
| H  | 6.66194  | -3.77167 | -0.96674 |
| H  | 6.64064  | -1.82361 | -2.49410 |
| Au | 0.83658  | 1.04766  | 0.19062  |
| C  | 1.39992  | 2.99888  | 0.48529  |
| C  | 2.68181  | 3.17547  | 1.03440  |
| C  | 0.63533  | 4.08817  | 0.10185  |
| C  | 3.16692  | 4.46718  | 1.22451  |

---

|   |          |          |          |
|---|----------|----------|----------|
| C | 1.13406  | 5.37990  | 0.29629  |
| H | -0.33726 | 3.95409  | -0.37046 |
| C | 2.39021  | 5.56422  | 0.86133  |
| H | 4.15728  | 4.62562  | 1.65113  |
| H | 0.53779  | 6.24044  | -0.00240 |
| H | 2.77661  | 6.57058  | 1.01122  |
| C | 2.68052  | 0.75703  | 1.01507  |
| C | 3.19348  | -0.49881 | 1.28165  |
| C | 3.38368  | 1.93087  | 1.33494  |
| C | 4.46967  | -0.60450 | 1.84082  |
| H | 2.62273  | -1.39925 | 1.06230  |
| C | 4.65142  | 1.80287  | 1.90036  |
| C | 5.19311  | 0.54321  | 2.14181  |
| H | 4.88926  | -1.59092 | 2.03262  |
| H | 5.22398  | 2.69395  | 2.15653  |
| H | 6.18734  | 0.45956  | 2.57665  |
| O | -1.26480 | 1.45111  | -0.50641 |
| C | -3.49496 | 2.05850  | -0.01611 |
| C | -2.10968 | 2.02329  | 0.23408  |
| C | -5.37185 | 1.46005  | -1.57382 |
| C | -4.03091 | 1.49907  | -1.16848 |
| C | -6.46461 | 1.92921  | -0.83316 |
| H | -1.75602 | 2.53694  | 1.14886  |
| H | -3.29969 | 1.06616  | -1.85677 |
| H | -4.11267 | 2.59474  | 0.70366  |
| C | -7.69756 | 2.41657  | -1.53378 |
| H | -6.23329 | 2.45441  | 0.09829  |
| H | -5.57597 | 1.05786  | -2.56737 |
| H | -8.58263 | 2.40984  | -0.88599 |
| H | -7.54167 | 3.45359  | -1.86262 |
| H | -7.91387 | 1.81867  | -2.42812 |
| C | -7.17856 | 0.27408  | 0.24583  |
| C | -7.71262 | -0.51192 | -0.77251 |
| C | -6.71037 | -1.37406 | -1.28034 |
| C | -5.57651 | -1.23096 | -0.52411 |
| C | -5.87770 | -0.36618 | 0.64689  |

---

|   |          |          |          |
|---|----------|----------|----------|
| H | -7.79594 | 0.83330  | 0.94768  |
| H | -8.71508 | -0.41043 | -1.18107 |
| H | -6.81867 | -2.01797 | -2.14797 |
| H | -4.63950 | -1.76582 | -0.67463 |
| H | -6.08400 | -1.01337 | 1.51893  |
| H | -5.06701 | 0.31045  | 0.94560  |
| C | -1.89165 | -3.82059 | -0.93410 |
| H | -2.25650 | -4.01832 | -1.94755 |
| H | -1.51598 | -4.77587 | -0.53180 |
| O | -2.98140 | -3.33610 | -0.18663 |

Bottom, towards, 2, endo, towards

M06/lanl2dz-6-31G(d) Energy = -2646.113654

M06/lanl2dz-6-31G(d) Free Energy = -2645.477254

M06/def2-TZVP Derived free energy = -2646.589244

M06/def2-TZVP Derived free energy in solution (toluene) = -2646.620131

M06/def2-TZVP Derived free energy in solution (nitromethane) = -2646.644953

Number of Imaginary Frequencies = 1 (-377.16)

M06/lanl2dz-6-31G(d) Geometry

|   |          |         |          |
|---|----------|---------|----------|
| C | 0.62897  | 2.72117 | -0.15304 |
| C | 1.00693  | 4.13964 | -0.63397 |
| C | -1.49057 | 3.21293 | -1.38469 |
| N | -0.68507 | 2.34594 | -0.68385 |
| C | -1.28433 | 1.13140 | -0.64894 |
| N | -2.41810 | 1.33407 | -1.34285 |
| N | -2.56401 | 2.61947 | -1.80855 |
| C | 1.97529  | 4.64286 | 0.43159  |
| C | 1.53554  | 3.91769 | 1.67352  |
| C | 0.73522  | 2.82122 | 1.34741  |
| C | 0.21350  | 1.99665 | 2.33587  |
| C | 0.50501  | 2.28557 | 3.66802  |
| C | 1.30654  | 3.37712 | 3.99589  |
| C | 1.82750  | 4.20113 | 3.00016  |
| C | -3.41681 | 0.36040 | -1.64260 |

---

|    |          |          |          |
|----|----------|----------|----------|
| C  | -4.71545 | 0.50791  | -1.07918 |
| C  | -5.66902 | -0.52408 | -1.31672 |
| C  | -5.30809 | -1.63460 | -2.11515 |
| C  | -4.06392 | -1.73419 | -2.67750 |
| C  | -3.11315 | -0.72125 | -2.44241 |
| C  | -5.09255 | 1.61407  | -0.27939 |
| C  | -6.35315 | 1.68497  | 0.26052  |
| C  | -7.29539 | 0.65938  | 0.03402  |
| C  | -6.95681 | -0.42062 | -0.73984 |
| H  | 1.34263  | 1.99241  | -0.56157 |
| H  | 1.43425  | 4.12633  | -1.65221 |
| H  | 1.92147  | 5.73585  | 0.50740  |
| H  | 3.00877  | 4.38062  | 0.15824  |
| H  | -0.42823 | 1.14891  | 2.09110  |
| H  | 0.09624  | 1.65644  | 4.45619  |
| H  | 1.51951  | 3.59431  | 5.04101  |
| H  | 2.44090  | 5.06278  | 3.26124  |
| H  | -6.04642 | -2.41716 | -2.28621 |
| H  | -3.78924 | -2.57835 | -3.30455 |
| Cl | -1.55435 | -0.88629 | -3.20084 |
| H  | -4.38337 | 2.42111  | -0.10938 |
| H  | -6.63054 | 2.54632  | 0.86530  |
| H  | -8.28970 | 0.73310  | 0.46926  |
| H  | -7.67561 | -1.21756 | -0.92763 |
| Au | -0.55230 | -0.79385 | 0.09371  |
| C  | -0.00655 | -2.70946 | 0.60140  |
| C  | -0.90700 | -3.38379 | 1.44442  |
| C  | 1.10648  | -3.35952 | 0.09349  |
| C  | -0.65139 | -4.70743 | 1.79533  |
| C  | 1.35129  | -4.68888 | 0.45049  |
| H  | 1.78114  | -2.85519 | -0.59749 |
| C  | 0.47857  | -5.35409 | 1.30330  |
| H  | -1.33781 | -5.24636 | 2.44794  |
| H  | 2.22287  | -5.20493 | 0.05068  |
| H  | 0.67093  | -6.38928 | 1.57892  |
| C  | -2.10909 | -1.28694 | 1.32761  |

---

|   |          |          |          |
|---|----------|----------|----------|
| C | -3.11480 | -0.40321 | 1.67361  |
| C | -2.05909 | -2.58840 | 1.85651  |
| C | -4.13275 | -0.82913 | 2.53118  |
| H | -3.12991 | 0.61635  | 1.29481  |
| C | -3.08176 | -2.99272 | 2.71336  |
| C | -4.11595 | -2.12104 | 3.04120  |
| H | -4.93215 | -0.13961 | 2.79699  |
| H | -3.06856 | -3.99762 | 3.13461  |
| H | -4.90888 | -2.45313 | 3.70853  |
| O | 1.35388  | -0.31035 | -0.99655 |
| C | 3.66594  | 0.10630  | -0.88802 |
| C | 2.44695  | -0.35265 | -0.36945 |
| C | 6.09146  | 0.47761  | -0.51543 |
| C | 4.82304  | 0.02824  | -0.13303 |
| C | 7.21019  | 0.46858  | 0.33240  |
| H | 2.46478  | -0.76902 | 0.65855  |
| H | 4.72800  | -0.39294 | 0.87571  |
| H | 3.68056  | 0.51590  | -1.89930 |
| C | 8.28286  | 1.50654  | 0.16459  |
| H | 7.00595  | 0.18427  | 1.37083  |
| H | 6.19625  | 0.92300  | -1.50821 |
| H | 8.47025  | 1.71614  | -0.89626 |
| H | 7.96365  | 2.44688  | 0.63470  |
| H | 9.23020  | 1.21215  | 0.63230  |
| C | 8.23503  | -1.28304 | -0.01685 |
| C | 8.68254  | -1.11385 | -1.32756 |
| C | 7.68521  | -1.55971 | -2.22952 |
| C | 6.66483  | -2.12322 | -1.51039 |
| C | 7.08000  | -2.24455 | -0.08749 |
| H | 8.90748  | -1.24760 | 0.83984  |
| H | 9.61006  | -0.62415 | -1.61436 |
| H | 7.71283  | -1.43538 | -3.30782 |
| H | 5.74119  | -2.52848 | -1.91485 |
| H | 6.28617  | -2.11656 | 0.65535  |
| H | 7.49040  | -3.25934 | 0.06361  |
| O | -0.12789 | 4.98183  | -0.60970 |



---

|   |          |         |          |
|---|----------|---------|----------|
| C | -1.06932 | 4.62833 | -1.58639 |
| H | -0.65249 | 4.75162 | -2.60311 |
| H | -1.92775 | 5.30099 | -1.49191 |

M06/lanl2dz-6-31G(d) Energy = -2646.111884

M06/lanl2dz-6-31G(d) Free Energy = -2645.476002

M06/def2-TZVP Derived free energy = -2646.588265

M06/def2-TZVP Derived free energy in solution (toluene) = -2646.618969

M06/def2-TZVP Derived free energy in solution (nitromethane) = -2646.644018

Number of Imaginary Frequencies = 1 (-385.62)

M06/lanl2dz-6-31G(d) Geometry

|   |          |          |          |
|---|----------|----------|----------|
| C | 0.27077  | 2.88701  | 0.18044  |
| C | 0.64115  | 4.30033  | -0.32394 |
| C | -1.41260 | 2.99406  | -1.66740 |
| N | -0.74291 | 2.29122  | -0.69374 |
| C | -1.19389 | 1.01473  | -0.69574 |
| N | -2.11577 | 1.01990  | -1.67251 |
| N | -2.26541 | 2.23939  | -2.29064 |
| C | 1.14417  | 5.01406  | 0.92669  |
| C | 0.37522  | 4.34923  | 2.03526  |
| C | -0.15599 | 3.13215  | 1.60573  |
| C | -0.90824 | 2.33626  | 2.45908  |
| C | -1.12955 | 2.78176  | 3.76132  |
| C | -0.59804 | 3.99468  | 4.19452  |
| C | 0.16051  | 4.78652  | 3.33453  |
| C | -2.91100 | -0.08735 | -2.09211 |
| C | -4.30798 | -0.06709 | -1.82513 |
| C | -5.07392 | -1.21645 | -2.17593 |
| C | -4.43172 | -2.31662 | -2.79197 |
| C | -3.08998 | -2.29897 | -3.06471 |
| C | -2.32555 | -1.16853 | -2.71417 |
| C | -4.95989 | 1.02608  | -1.20426 |
| C | -6.30615 | 0.97303  | -0.93995 |
| C | -7.06587 | -0.16584 | -1.28276 |
| C | -6.45966 | -1.23523 | -1.89011 |

---

|    |          |          |          |
|----|----------|----------|----------|
| H  | 1.15159  | 2.23109  | 0.12823  |
| H  | 1.37652  | 4.26456  | -1.14706 |
| H  | 0.96810  | 6.09356  | 0.84374  |
| H  | 2.22848  | 4.86449  | 1.04078  |
| H  | -1.33264 | 1.38756  | 2.12740  |
| H  | -1.72597 | 2.17672  | 4.44130  |
| H  | -0.78353 | 4.33066  | 5.21297  |
| H  | 0.56440  | 5.73971  | 3.67353  |
| H  | -5.02744 | -3.18983 | -3.05556 |
| H  | -2.59708 | -3.13754 | -3.54977 |
| Cl | -0.62753 | -1.17918 | -3.09267 |
| H  | -4.39122 | 1.91870  | -0.95083 |
| H  | -6.79498 | 1.82251  | -0.46664 |
| H  | -8.13205 | -0.18884 | -1.06808 |
| H  | -7.03440 | -2.11956 | -2.16358 |
| Au | -0.40788 | -0.73153 | 0.34920  |
| C  | 0.28436  | -2.47043 | 1.20163  |
| C  | -0.64568 | -3.14991 | 2.00820  |
| C  | 1.54307  | -3.00627 | 0.97926  |
| C  | -0.27498 | -4.34486 | 2.62066  |
| C  | 1.90324  | -4.20793 | 1.59563  |
| H  | 2.25307  | -2.51652 | 0.31345  |
| C  | 0.99974  | -4.86676 | 2.42028  |
| H  | -0.98220 | -4.88128 | 3.25280  |
| H  | 2.89165  | -4.63126 | 1.42220  |
| H  | 1.28213  | -5.80098 | 2.90189  |
| C  | -2.09123 | -1.32352 | 1.34827  |
| C  | -3.27407 | -0.60682 | 1.33428  |
| C  | -1.95542 | -2.51021 | 2.08929  |
| C  | -4.37163 | -1.08858 | 2.05252  |
| H  | -3.37093 | 0.32140  | 0.77505  |
| C  | -3.05979 | -2.96853 | 2.80647  |
| C  | -4.26056 | -2.26470 | 2.78326  |
| H  | -5.30760 | -0.53257 | 2.03253  |
| H  | -2.98573 | -3.88666 | 3.38868  |
| H  | -5.11441 | -2.63895 | 3.34468  |

---

|   |          |          |          |
|---|----------|----------|----------|
| O | 1.55572  | -0.12508 | -0.56679 |
| C | 3.86150  | 0.30255  | -0.39623 |
| C | 2.60430  | -0.04177 | 0.12474  |
| C | 6.30226  | 0.63254  | 0.11350  |
| C | 4.96807  | 0.34311  | 0.43699  |
| C | 6.79423  | 0.91501  | -1.16707 |
| H | 2.55263  | -0.24930 | 1.21307  |
| H | 4.77264  | 0.13895  | 1.49497  |
| H | 3.91859  | 0.52570  | -1.46241 |
| C | 8.00472  | 1.78586  | -1.33072 |
| H | 6.05141  | 1.01320  | -1.96442 |
| H | 7.01037  | 0.67818  | 0.94212  |
| H | 7.70691  | 2.84185  | -1.26660 |
| H | 8.73879  | 1.60341  | -0.53591 |
| H | 8.49759  | 1.64528  | -2.30041 |
| C | 7.44915  | -0.91471 | -1.96052 |
| C | 8.55244  | -1.19341 | -1.15626 |
| C | 8.13372  | -1.91807 | -0.01336 |
| C | 6.79922  | -2.20344 | -0.13788 |
| C | 6.33886  | -1.81500 | -1.49420 |
| H | 7.53979  | -0.58643 | -2.99526 |
| H | 9.56141  | -0.82657 | -1.32798 |
| H | 8.76377  | -2.17418 | 0.83318  |
| H | 6.18947  | -2.74446 | 0.58074  |
| H | 6.35098  | -2.71637 | -2.13346 |
| H | 5.31807  | -1.41967 | -1.54715 |
| C | -1.07949 | 4.42559  | -1.91140 |
| H | -0.38252 | 4.49997  | -2.76685 |
| H | -1.98102 | 4.99351  | -2.16275 |
| O | -0.51984 | 4.98409  | -0.75472 |

M06/lanl2dz-6-31G(d) Energy = -2646.113110

M06/lanl2dz-6-31G(d) Free Energy = -2645.474410

M06/def2-TZVP Derived free energy = -2646.584951

M06/def2-TZVP Derived free energy in solution (toluene) = -2646.615416

M06/def2-TZVP Derived free energy in solution (nitromethane) = -2646.640081

---

Number of Imaginary Frequencies = 1 (-376.37)

M06/lanl2dz-6-31G(d) Geometry

|   |          |          |          |
|---|----------|----------|----------|
| C | -0.62077 | 3.28439  | -0.18978 |
| C | -0.75565 | 4.66120  | -0.88011 |
| C | -2.21962 | 2.58008  | -1.98586 |
| N | -1.39428 | 2.28012  | -0.92664 |
| C | -1.38576 | 0.93844  | -0.75431 |
| N | -2.20309 | 0.50129  | -1.72805 |
| N | -2.73171 | 1.50476  | -2.50360 |
| C | -0.51988 | 5.66547  | 0.24330  |
| C | -0.97597 | 4.92909  | 1.47238  |
| C | -1.06163 | 3.55800  | 1.22569  |
| C | -1.44672 | 2.67304  | 2.22466  |
| C | -1.75670 | 3.18322  | 3.48419  |
| C | -1.67316 | 4.55190  | 3.73289  |
| C | -1.28056 | 5.43420  | 2.72890  |
| C | -2.51514 | -0.86499 | -1.99430 |
| C | -3.83340 | -1.33724 | -1.74337 |
| C | -4.07615 | -2.73700 | -1.85821 |
| C | -3.01970 | -3.59710 | -2.23944 |
| C | -1.77285 | -3.11015 | -2.52892 |
| C | -1.52471 | -1.72859 | -2.41198 |
| C | -4.89999 | -0.48865 | -1.35972 |
| C | -6.14403 | -1.00967 | -1.10199 |
| C | -6.38398 | -2.39664 | -1.20580 |
| C | -5.36841 | -3.23975 | -1.57622 |
| H | 0.42597  | 2.94885  | -0.22917 |
| H | -0.05417 | 4.76574  | -1.72633 |
| H | -1.07363 | 6.59111  | 0.04357  |
| H | 0.54692  | 5.92793  | 0.30382  |
| H | -1.52021 | 1.60036  | 2.03864  |
| H | -2.06916 | 2.50631  | 4.27681  |
| H | -1.92243 | 4.93581  | 4.72030  |
| H | -1.22450 | 6.50426  | 2.92461  |
| H | -3.21673 | -4.66579 | -2.31513 |

---

|    |          |          |          |
|----|----------|----------|----------|
| H  | -0.96607 | -3.76502 | -2.84770 |
| Cl | 0.07191  | -1.15636 | -2.81201 |
| H  | -4.73622 | 0.58442  | -1.29106 |
| H  | -6.95738 | -0.34375 | -0.81994 |
| H  | -7.37646 | -2.79109 | -0.99869 |
| H  | -5.53871 | -4.31215 | -1.66565 |
| Au | -0.17715 | -0.36411 | 0.50515  |
| C  | 0.93952  | -1.81876 | 1.43384  |
| C  | 0.19026  | -2.83099 | 2.05875  |
| C  | 2.32100  | -1.90672 | 1.36266  |
| C  | 0.85128  | -3.91925 | 2.62495  |
| C  | 2.97215  | -3.00460 | 1.93228  |
| H  | 2.90256  | -1.13261 | 0.86219  |
| C  | 2.23907  | -4.00307 | 2.56249  |
| H  | 0.28698  | -4.71291 | 3.11395  |
| H  | 4.05897  | -3.08194 | 1.87819  |
| H  | 2.74846  | -4.85619 | 3.00665  |
| C  | -1.67661 | -1.44602 | 1.38009  |
| C  | -3.00664 | -1.06687 | 1.35927  |
| C  | -1.25325 | -2.61157 | 2.04239  |
| C  | -3.95894 | -1.88961 | 1.96742  |
| H  | -3.32666 | -0.14296 | 0.88119  |
| C  | -2.21935 | -3.42090 | 2.63797  |
| C  | -3.56454 | -3.06609 | 2.59179  |
| H  | -5.00905 | -1.60284 | 1.93724  |
| H  | -1.91937 | -4.33161 | 3.15586  |
| H  | -4.30734 | -3.70898 | 3.05998  |
| O  | 1.63393  | 0.73672  | -0.22439 |
| C  | 3.73188  | 1.58908  | 0.44371  |
| C  | 2.35692  | 1.36298  | 0.60567  |
| C  | 5.79860  | 1.12231  | -0.85690 |
| C  | 4.43003  | 1.01094  | -0.60715 |
| C  | 6.42650  | 0.54618  | -1.97481 |
| H  | 1.88592  | 1.75423  | 1.52898  |
| H  | 3.83205  | 0.41840  | -1.30826 |
| H  | 4.24981  | 2.18585  | 1.19369  |

---

|   |          |          |          |
|---|----------|----------|----------|
| C | 7.66642  | 1.17471  | -2.54251 |
| H | 5.74584  | 0.11817  | -2.71900 |
| H | 6.40210  | 1.72779  | -0.17542 |
| H | 8.23568  | 0.48531  | -3.17766 |
| H | 7.39015  | 2.03878  | -3.16232 |
| H | 8.32767  | 1.54008  | -1.74666 |
| C | 7.08064  | -1.32137 | -1.41730 |
| C | 8.06175  | -1.02537 | -0.46933 |
| C | 7.46367  | -0.90044 | 0.80849  |
| C | 6.13891  | -1.23342 | 0.70552  |
| C | 5.88018  | -1.79964 | -0.64578 |
| H | 7.32343  | -1.70555 | -2.40767 |
| H | 9.10638  | -0.82193 | -0.69266 |
| H | 7.96663  | -0.55508 | 1.70665  |
| H | 5.40454  | -1.19702 | 1.50772  |
| H | 5.95248  | -2.90039 | -0.57483 |
| H | 4.89744  | -1.58243 | -1.07657 |
| O | -2.08045 | 4.84682  | -1.33864 |
| C | -2.40258 | 3.99807  | -2.40591 |
| H | -1.77174 | 4.21077  | -3.28880 |
| H | -3.44476 | 4.18412  | -2.68493 |

M06/lanl2dz-6-31G(d) Energy = -2646.112786

M06/lanl2dz-6-31G(d) Free Energy = -2645.474898

M06/def2-TZVP Derived free energy = -2646.584127

M06/def2-TZVP Derived free energy in solution (toluene) = -2646.614664

M06/def2-TZVP Derived free energy in solution (nitromethane) = -2646.638867

Number of Imaginary Frequencies = 1(-373.64)

M06/lanl2dz-6-31G(d) Geometry

|   |          |          |          |
|---|----------|----------|----------|
| C | 1.49858  | -1.51672 | -1.36933 |
| C | 2.91316  | -2.18922 | -1.25402 |
| C | 1.05233  | -2.49901 | 0.87494  |
| N | 0.80515  | -1.54142 | -0.07566 |
| C | -0.22673 | -0.77289 | 0.34059  |
| N | -0.55001 | -1.31993 | 1.52487  |

---

|    |          |          |          |
|----|----------|----------|----------|
| N  | 0.24314  | -2.38747 | 1.88372  |
| C  | 2.94664  | -3.31720 | -2.30738 |
| C  | 1.57703  | -3.34010 | -2.91782 |
| C  | 0.77114  | -2.32590 | -2.40700 |
| C  | -0.53479 | -2.14389 | -2.85310 |
| C  | -1.03281 | -3.00923 | -3.82046 |
| C  | -0.23153 | -4.03233 | -4.33182 |
| C  | 1.07610  | -4.20193 | -3.88912 |
| C  | -1.60029 | -0.89491 | 2.39158  |
| C  | -2.74466 | -1.72683 | 2.53730  |
| C  | -3.82372 | -1.24650 | 3.33398  |
| C  | -3.71070 | 0.01269  | 3.97006  |
| C  | -2.58503 | 0.78092  | 3.83877  |
| C  | -1.51941 | 0.31722  | 3.04213  |
| C  | -2.87000 | -2.98818 | 1.90574  |
| C  | -4.01786 | -3.72757 | 2.05095  |
| C  | -5.09120 | -3.24983 | 2.83296  |
| C  | -4.99083 | -2.03592 | 3.46271  |
| H  | 1.59400  | -0.45850 | -1.64327 |
| H  | 3.68096  | -1.43241 | -1.45689 |
| H  | 3.22679  | -4.27089 | -1.83608 |
| H  | 3.72165  | -3.11836 | -3.06036 |
| H  | -1.15959 | -1.34018 | -2.45805 |
| H  | -2.05026 | -2.88457 | -4.18550 |
| H  | -0.63404 | -4.70259 | -5.08901 |
| H  | 1.69788  | -4.99786 | -4.29730 |
| H  | -4.54263 | 0.36741  | 4.57730  |
| H  | -2.49209 | 1.74440  | 4.33312  |
| Cl | -0.10654 | 1.32050  | 2.89997  |
| H  | -2.04462 | -3.37853 | 1.31371  |
| H  | -4.09841 | -4.69742 | 1.56359  |
| H  | -5.99265 | -3.84953 | 2.93775  |
| H  | -5.80916 | -1.65682 | 4.07390  |
| Au | -0.96346 | 1.10009  | -0.50589 |
| C  | -1.68730 | 2.89931  | -1.17821 |
| C  | -3.04248 | 2.89772  | -1.55145 |

---

|   |          |          |          |
|---|----------|----------|----------|
| C | -0.94141 | 4.06514  | -1.22304 |
| C | -3.62303 | 4.07796  | -2.00929 |
| C | -1.53572 | 5.24472  | -1.68197 |
| H | 0.09322  | 4.08284  | -0.88304 |
| C | -2.86713 | 5.24481  | -2.08017 |
| H | -4.67163 | 4.09746  | -2.30542 |
| H | -0.95388 | 6.16412  | -1.71899 |
| H | -3.32649 | 6.16401  | -2.43870 |
| C | -2.90870 | 0.58461  | -0.85705 |
| C | -3.40686 | -0.68357 | -0.62285 |
| C | -3.71453 | 1.61385  | -1.37395 |
| C | -4.75443 | -0.94564 | -0.88323 |
| H | -2.77452 | -1.47760 | -0.23212 |
| C | -5.05270 | 1.32749  | -1.64040 |
| C | -5.56899 | 0.05834  | -1.39189 |
| H | -5.15418 | -1.93878 | -0.68323 |
| H | -5.70350 | 2.10428  | -2.04086 |
| H | -6.61803 | -0.14473 | -1.59893 |
| O | 1.19406  | 1.68063  | -0.27409 |
| C | 3.32448  | 1.82386  | -1.26493 |
| C | 1.94122  | 2.07908  | -1.20929 |
| C | 5.25468  | 0.56994  | -0.31425 |
| C | 3.92999  | 1.01325  | -0.31718 |
| C | 5.72176  | -0.40864 | 0.57831  |
| H | 1.49113  | 2.64652  | -2.04536 |
| H | 3.27251  | 0.62559  | 0.47070  |
| H | 3.89524  | 2.23335  | -2.09746 |
| C | 6.81800  | -1.34337 | 0.15960  |
| H | 4.95106  | -0.86684 | 1.20739  |
| H | 5.92814  | 0.93535  | -1.09425 |
| H | 7.57114  | -0.83282 | -0.45403 |
| H | 7.32311  | -1.81138 | 1.01323  |
| H | 6.38534  | -2.15405 | -0.44534 |
| C | 6.54901  | 0.58083  | 2.20001  |
| C | 7.64703  | 1.21337  | 1.61981  |
| C | 7.25208  | 2.47626  | 1.10951  |



---

|   |         |          |         |
|---|---------|----------|---------|
| C | 5.95017 | 2.70445  | 1.46507 |
| C | 5.50687 | 1.64437  | 2.40925 |
| H | 6.64813 | -0.27587 | 2.86570 |
| H | 8.63141 | 0.76873  | 1.49358 |
| H | 7.87297 | 3.13050  | 0.50494 |
| H | 5.35405 | 3.57330  | 1.20000 |
| H | 5.63240 | 2.02966  | 3.43728 |
| H | 4.46037 | 1.33521  | 2.32059 |
| O | 3.22740 | -2.63558 | 0.05419 |
| C | 2.20997 | -3.40345 | 0.65904 |
| H | 1.92523 | -4.26869 | 0.03483 |
| H | 2.58931 | -3.78295 | 1.61241 |

M06/lanl2dz-6-31G(d) Energy = -2646.111884

M06/lanl2dz-6-31G(d) Free Energy = -2645.475998

M06/def2-TZVP Derived free energy = -2646.588261

M06/def2-TZVP Derived free energy in solution (toluene) = -2646.618965

M06/def2-TZVP Derived free energy in solution (nitromethane) = -2646.644014

Number of Imaginary Frequencies = 1 (-385.60)

M06/lanl2dz-6-31G(d) Geometry

|   |          |          |          |
|---|----------|----------|----------|
| C | 0.27008  | 2.88720  | 0.18054  |
| C | 0.64066  | 4.30032  | -0.32419 |
| C | -1.41244 | 2.99348  | -1.66811 |
| N | -0.74308 | 2.29101  | -0.69396 |
| C | -1.19387 | 1.01445  | -0.69580 |
| N | -2.11534 | 1.01921  | -1.67295 |
| N | -2.26489 | 2.23851  | -2.29149 |
| C | 1.14305  | 5.01452  | 0.92643  |
| C | 0.37344  | 4.35016  | 2.03483  |
| C | -0.15752 | 3.13291  | 1.60548  |
| C | -0.91034 | 2.33739  | 2.45868  |
| C | -1.13244 | 2.78344  | 3.76059  |
| C | -0.60117 | 3.99653  | 4.19362  |
| C | 0.15793  | 4.78800  | 3.33378  |
| C | -2.91025 | -0.08825 | -2.09258 |

---

|    |          |          |          |
|----|----------|----------|----------|
| C  | -4.30732 | -0.06818 | -1.82603 |
| C  | -5.07296 | -1.21770 | -2.17694 |
| C  | -4.43040 | -2.31786 | -2.79263 |
| C  | -3.08857 | -2.30005 | -3.06491 |
| C  | -2.32443 | -1.16944 | -2.71428 |
| C  | -4.95956 | 1.02496  | -1.20547 |
| C  | -6.30589 | 0.97173  | -0.94155 |
| C  | -7.06534 | -0.16727 | -1.28451 |
| C  | -6.45880 | -1.23664 | -1.89157 |
| H  | 1.15096  | 2.23128  | 0.12912  |
| H  | 1.37642  | 4.26428  | -1.14695 |
| H  | 0.96712  | 6.09400  | 0.84296  |
| H  | 2.22728  | 4.86489  | 1.04116  |
| H  | -1.33455 | 1.38859  | 2.12710  |
| H  | -1.72929 | 2.17869  | 4.44045  |
| H  | -0.78729 | 4.33293  | 5.21182  |
| H  | 0.56162  | 5.74133  | 3.67263  |
| H  | -5.02592 | -3.19118 | -3.05631 |
| H  | -2.59540 | -3.13861 | -3.54971 |
| Cl | -0.62628 | -1.17988 | -3.09219 |
| H  | -4.39109 | 1.91767  | -0.95195 |
| H  | -6.79498 | 1.82119  | -0.46846 |
| H  | -8.13160 | -0.19040 | -1.07017 |
| H  | -7.03334 | -2.12106 | -2.16514 |
| Au | -0.40776 | -0.73141 | 0.34967  |
| C  | 0.28461  | -2.47002 | 1.20259  |
| C  | -0.64542 | -3.14941 | 2.00926  |
| C  | 1.54338  | -3.00580 | 0.98043  |
| C  | -0.27463 | -4.34414 | 2.62207  |
| C  | 1.90364  | -4.20726 | 1.59713  |
| H  | 2.25337  | -2.51616 | 0.31452  |
| C  | 1.00016  | -4.86595 | 2.42192  |
| H  | -0.98184 | -4.88049 | 3.25428  |
| H  | 2.89210  | -4.63054 | 1.42387  |
| H  | 1.28262  | -5.80001 | 2.90381  |
| C  | -2.09120 | -1.32349 | 1.34852  |

---

|   |          |          |          |
|---|----------|----------|----------|
| C | -3.27421 | -0.60710 | 1.33398  |
| C | -1.95528 | -2.50991 | 2.08995  |
| C | -4.37184 | -1.08889 | 2.05211  |
| H | -3.37117 | 0.32090  | 0.77440  |
| C | -3.05972 | -2.96825 | 2.80701  |
| C | -4.26065 | -2.26473 | 2.78328  |
| H | -5.30795 | -0.53312 | 2.03166  |
| H | -2.98559 | -3.88618 | 3.38953  |
| H | -5.11455 | -2.63900 | 3.34461  |
| O | 1.55584  | -0.12458 | -0.56612 |
| C | 3.86167  | 0.30286  | -0.39570 |
| C | 2.60451  | -0.04154 | 0.12532  |
| C | 6.30249  | 0.63262  | 0.11386  |
| C | 4.96832  | 0.34318  | 0.43743  |
| C | 6.79434  | 0.91532  | -1.16670 |
| H | 2.55297  | -0.24939 | 1.21359  |
| H | 4.77299  | 0.13878  | 1.49537  |
| H | 3.91867  | 0.52630  | -1.46183 |
| C | 8.00482  | 1.78619  | -1.33034 |
| H | 6.05142  | 1.01366  | -1.96396 |
| H | 7.01069  | 0.67808  | 0.94241  |
| H | 8.73896  | 1.60362  | -0.53563 |
| H | 8.49760  | 1.64574  | -2.30009 |
| H | 7.70701  | 2.84217  | -1.26604 |
| C | 7.44917  | -0.91428 | -1.96053 |
| C | 8.55251  | -1.19316 | -1.15639 |
| C | 8.13385  | -1.91802 | -0.01361 |
| C | 6.79932  | -2.20332 | -0.13809 |
| C | 6.33888  | -1.81462 | -1.49431 |
| H | 7.53976  | -0.58581 | -2.99522 |
| H | 9.56148  | -0.82631 | -1.32812 |
| H | 8.76394  | -2.17431 | 0.83284  |
| H | 6.18961  | -2.74446 | 0.58047  |
| H | 6.35093  | -2.71587 | -2.13372 |
| H | 5.31810  | -1.41925 | -1.54712 |
| C | -1.07934 | 4.42495  | -1.91245 |

---

|   |          |         |          |
|---|----------|---------|----------|
| H | -0.38205 | 4.49908 | -2.76765 |
| H | -1.98080 | 4.99273 | -2.16433 |
| O | -0.52016 | 4.98389 | -0.75575 |

Top, away, 1, exo, towards

M06/lanl2dz-6-31G(d) Energy = -2646.113121

M06/lanl2dz-6-31G(d) Free Energy = -2645.475339

M06/def2-TZVP Derived free energy = -2646.586116

M06/def2-TZVP Derived free energy in solution (toluene) = -2646.617223

M06/def2-TZVP Derived free energy in solution (nitromethane) = -2646.642272

Number of Imaginary Frequencies = 1 (-380.54)

M06/lanl2dz-6-31G(d) Geometry

|   |          |          |          |
|---|----------|----------|----------|
| C | 3.51244  | -2.20244 | -0.32826 |
| C | 3.94020  | -3.68171 | -0.35945 |
| C | 2.09535  | -3.06951 | 1.57373  |
| N | 2.38462  | -2.10103 | 0.63627  |
| C | 1.47294  | -1.10940 | 0.75723  |
| N | 0.68875  | -1.53040 | 1.75989  |
| N | 1.05683  | -2.74513 | 2.28329  |
| C | 2.96653  | -4.33706 | -1.35913 |
| C | 2.71124  | -3.20678 | -2.31756 |
| C | 3.06503  | -1.98238 | -1.74135 |
| C | 3.00612  | -0.79785 | -2.46512 |
| C | 2.51232  | -0.83815 | -3.76695 |
| C | 2.12269  | -2.05163 | -4.33334 |
| C | 2.23713  | -3.24524 | -3.62221 |
| C | -0.49404 | -0.88231 | 2.22010  |
| C | -0.39163 | 0.35547  | 2.91492  |
| C | -1.59535 | 1.01621  | 3.30024  |
| C | -2.83875 | 0.39702  | 3.02973  |
| C | -2.90778 | -0.80744 | 2.38152  |
| C | -1.72460 | -1.44644 | 1.95920  |
| C | 0.84765  | 0.96361  | 3.22526  |
| C | 0.89009  | 2.18698  | 3.84600  |

---

|    |          |          |          |
|----|----------|----------|----------|
| C  | -0.30044 | 2.85158  | 4.20896  |
| C  | -1.51595 | 2.27028  | 3.95079  |
| H  | 4.30562  | -1.52828 | 0.02081  |
| H  | 4.95099  | -3.71329 | -0.78473 |
| H  | 2.03438  | -4.65712 | -0.86629 |
| H  | 3.39776  | -5.22858 | -1.82977 |
| H  | 3.36392  | 0.13902  | -2.03714 |
| H  | 2.45069  | 0.07994  | -4.34827 |
| H  | 1.74970  | -2.07067 | -5.35567 |
| H  | 1.96852  | -4.19233 | -4.08838 |
| H  | -3.75060 | 0.89834  | 3.35664  |
| H  | -3.85869 | -1.29638 | 2.18346  |
| Cl | -1.87553 | -2.93324 | 1.07794  |
| H  | 1.77429  | 0.45812  | 2.96680  |
| H  | 1.85419  | 2.64462  | 4.06115  |
| H  | -0.24969 | 3.81971  | 4.70228  |
| H  | -2.44211 | 2.76498  | 4.24205  |
| Au | 1.17947  | 0.72552  | -0.34406 |
| C  | 0.94435  | 2.48489  | -1.37672 |
| C  | 1.90096  | 3.47447  | -1.08743 |
| C  | -0.04995 | 2.71639  | -2.31386 |
| C  | 1.82259  | 4.70808  | -1.73014 |
| C  | -0.11607 | 3.95719  | -2.95513 |
| H  | -0.77311 | 1.94106  | -2.56623 |
| C  | 0.81228  | 4.94792  | -2.65734 |
| H  | 2.55483  | 5.48745  | -1.51959 |
| H  | -0.89426 | 4.14269  | -3.69386 |
| H  | 0.75683  | 5.91322  | -3.15710 |
| C  | 2.82068  | 1.74054  | 0.33099  |
| C  | 3.75431  | 1.20648  | 1.20501  |
| C  | 2.92852  | 3.06328  | -0.13393 |
| C  | 4.81455  | 2.00150  | 1.64874  |
| H  | 3.67292  | 0.17910  | 1.56107  |
| C  | 3.99268  | 3.84190  | 0.32251  |
| C  | 4.92558  | 3.31553  | 1.21024  |
| H  | 5.54876  | 1.58735  | 2.33747  |

---

|   |          |          |          |
|---|----------|----------|----------|
| H | 4.09742  | 4.87071  | -0.02078 |
| H | 5.74994  | 3.93603  | 1.55617  |
| O | -0.65730 | -0.24514 | -1.10990 |
| C | -2.98318 | -0.36934 | -1.37651 |
| C | -1.80885 | 0.18803  | -0.84590 |
| C | -5.40230 | -0.14841 | -1.81851 |
| C | -4.21100 | 0.23087  | -1.18026 |
| C | -6.57307 | 0.62989  | -1.84260 |
| H | -1.91868 | 1.07556  | -0.18864 |
| H | -4.24892 | 1.11088  | -0.52563 |
| H | -2.88264 | -1.23771 | -2.02907 |
| C | -7.47585 | 0.53887  | -3.04591 |
| H | -6.47494 | 1.63712  | -1.42992 |
| H | -5.36596 | -1.04147 | -2.44919 |
| H | -6.98538 | 1.00687  | -3.90998 |
| H | -7.68495 | -0.50508 | -3.31521 |
| H | -8.43115 | 1.05307  | -2.89395 |
| C | -7.82859 | -0.13915 | -0.42910 |
| C | -7.32080 | 0.44177  | 0.73600  |
| C | -6.26886 | -0.35578 | 1.23403  |
| C | -6.17701 | -1.49693 | 0.47469  |
| C | -7.36362 | -1.57284 | -0.42019 |
| H | -8.79253 | 0.14757  | -0.84638 |
| H | -7.61386 | 1.41193  | 1.12934  |
| H | -5.61105 | -0.07597 | 2.05244  |
| H | -5.44354 | -2.29215 | 0.59140  |
| H | -7.20440 | -2.04932 | -1.39219 |
| H | -8.14158 | -2.16355 | 0.09772  |
| C | 2.87120  | -4.34051 | 1.65100  |
| H | 3.14380  | -4.55506 | 2.69037  |
| H | 2.23237  | -5.17212 | 1.30616  |
| O | 4.06197  | -4.25818 | 0.91591  |

M06/lanl2dz-6-31G(d) Energy = -2646.117087

M06/lanl2dz-6-31G(d) Free Energy = -2645.476048

M06/def2-TZVP Derived free energy = -2646.585037

---

M06/def2-TZVP Derived free energy in solution (toluene) = -2646.615570

M06/def2-TZVP Derived free energy in solution (nitromethane) = -2646.640144

Number of Imaginary Frequencies = 1 (-390.86)

M06/lanl2dz-6-31G(d) Geometry

|   |          |          |          |
|---|----------|----------|----------|
| C | -0.83448 | -0.16838 | 3.18439  |
| C | -2.36616 | -0.17301 | 3.45698  |
| C | -1.15364 | 2.03793  | 2.17760  |
| N | -0.56552 | 0.79780  | 2.10094  |
| C | 0.29500  | 0.78316  | 1.05816  |
| N | 0.20057  | 2.04122  | 0.58391  |
| N | -0.70304 | 2.83529  | 1.25612  |
| C | -2.89487 | -1.37884 | 2.67989  |
| C | -1.71030 | -2.29536 | 2.60623  |
| C | -0.53182 | -1.59634 | 2.86368  |
| C | 0.71113  | -2.21792 | 2.80539  |
| C | 0.76221  | -3.56542 | 2.45551  |
| C | -0.41507 | -4.26724 | 2.19406  |
| C | -1.65812 | -3.64296 | 2.27753  |
| C | 1.03434  | 2.61084  | -0.42402 |
| C | 2.20611  | 3.30249  | -0.01390 |
| C | 3.09933  | 3.76818  | -1.02092 |
| C | 2.77635  | 3.56017  | -2.38285 |
| C | 1.61408  | 2.93724  | -2.75462 |
| C | 0.73671  | 2.46624  | -1.75899 |
| C | 2.52607  | 3.52936  | 1.34636  |
| C | 3.68781  | 4.17676  | 1.68760  |
| C | 4.58314  | 4.62449  | 0.69216  |
| C | 4.29142  | 4.42489  | -0.63293 |
| H | -0.27160 | 0.20183  | 4.05393  |
| H | -2.50191 | -0.31719 | 4.54241  |
| H | -3.15914 | -1.03483 | 1.66577  |
| H | -3.78937 | -1.82072 | 3.13494  |
| H | 1.62667  | -1.66571 | 3.02530  |
| H | 1.72338  | -4.07090 | 2.38730  |
| H | -0.36020 | -5.32144 | 1.92880  |

---

|    |          |          |          |
|----|----------|----------|----------|
| H  | -2.57069 | -4.20299 | 2.07733  |
| H  | 3.46770  | 3.91819  | -3.14477 |
| H  | 1.35433  | 2.79498  | -3.80036 |
| Cl | -0.75151 | 1.71271  | -2.25768 |
| H  | 1.83783  | 3.19830  | 2.12308  |
| H  | 3.91855  | 4.35375  | 2.73636  |
| H  | 5.49885  | 5.13599  | 0.98057  |
| H  | 4.97051  | 4.77323  | -1.41033 |
| Au | 1.05006  | -0.97405 | -0.02345 |
| C  | 1.67038  | -2.56314 | -1.15735 |
| C  | 3.04366  | -2.58911 | -1.45368 |
| C  | 0.81764  | -3.55036 | -1.62118 |
| C  | 3.54232  | -3.61131 | -2.25810 |
| C  | 1.33228  | -4.57143 | -2.42604 |
| H  | -0.23915 | -3.54386 | -1.35486 |
| C  | 2.68487  | -4.59361 | -2.74689 |
| H  | 4.60351  | -3.65122 | -2.50332 |
| H  | 0.66986  | -5.35058 | -2.79974 |
| H  | 3.08018  | -5.38845 | -3.37658 |
| C  | 3.06627  | -0.65477 | -0.00447 |
| C  | 3.66689  | 0.34214  | 0.74116  |
| C  | 3.81499  | -1.52718 | -0.81433 |
| C  | 5.05000  | 0.52097  | 0.64939  |
| H  | 3.08132  | 0.99277  | 1.38704  |
| C  | 5.19333  | -1.33359 | -0.89036 |
| C  | 5.80390  | -0.30932 | -0.17070 |
| H  | 5.52648  | 1.31804  | 1.21866  |
| H  | 5.79968  | -1.99279 | -1.51131 |
| H  | 6.88058  | -0.16876 | -0.24456 |
| O  | -1.14586 | -1.44232 | -0.16994 |
| C  | -3.19887 | -1.12358 | -1.27500 |
| C  | -1.79826 | -1.22494 | -1.22223 |
| C  | -5.13934 | -0.25974 | -2.58106 |
| C  | -3.79608 | -0.61874 | -2.41654 |
| C  | -6.12608 | -0.42404 | -1.60116 |
| H  | -1.25545 | -1.08473 | -2.17806 |



---

|   |          |          |          |
|---|----------|----------|----------|
| H | -3.13651 | -0.44283 | -3.27234 |
| H | -3.76619 | -1.34068 | -0.36930 |
| C | -7.57118 | -0.41955 | -2.01083 |
| H | -5.89275 | -1.09715 | -0.77394 |
| H | -5.43521 | 0.17217  | -3.53816 |
| H | -8.25534 | -0.31983 | -1.16118 |
| H | -7.78912 | 0.38045  | -2.73003 |
| H | -7.80568 | -1.37168 | -2.50687 |
| C | -6.06835 | 1.29702  | -0.41964 |
| C | -4.86454 | 1.20829  | 0.27703  |
| C | -3.84420 | 1.88506  | -0.44328 |
| C | -4.39789 | 2.48303  | -1.53906 |
| C | -5.88063 | 2.36107  | -1.47075 |
| H | -7.02953 | 1.12657  | 0.06281  |
| H | -4.71250 | 0.68528  | 1.21958  |
| H | -2.78656 | 1.88001  | -0.17931 |
| H | -3.86787 | 3.05970  | -2.29189 |
| H | -6.29148 | 3.30479  | -1.06855 |
| H | -6.38189 | 2.19535  | -2.43039 |
| O | -3.04160 | 1.00186  | 3.04666  |
| C | -2.27847 | 2.18584  | 3.14148  |
| H | -1.91632 | 2.35344  | 4.17107  |
| H | -2.91997 | 3.02680  | 2.86082  |

M06/lanl2dz-6-31G(d) Energy = -2646.117087

M06/lanl2dz-6-31G(d) Free Energy = -2645.476035

M06/def2-TZVP Derived free energy = -2646.585023

M06/def2-TZVP Derived free energy in solution (toluene) = -2646.615556

M06/def2-TZVP Derived free energy in solution (nitromethane) = -2646.640130

Number of Imaginary Frequencies = 1 (-390.84)

M06/lanl2dz-6-31G(d) Geometry

|   |          |          |         |
|---|----------|----------|---------|
| C | -0.83437 | -0.16941 | 3.18416 |
| C | -2.36607 | -0.17446 | 3.45663 |
| C | -1.15393 | 2.03713  | 2.17803 |
| N | -0.56558 | 0.79712  | 2.10097 |

---

|    |          |          |          |
|----|----------|----------|----------|
| C  | 0.29476  | 0.78290  | 1.05805  |
| N  | 0.20002  | 2.04107  | 0.58411  |
| N  | -0.70364 | 2.83479  | 1.25668  |
| C  | -2.89441 | -1.38020 | 2.67917  |
| C  | -1.70964 | -2.29646 | 2.60552  |
| C  | -0.53133 | -1.59722 | 2.86317  |
| C  | 0.71177  | -2.21848 | 2.80484  |
| C  | 0.76319  | -3.56590 | 2.45472  |
| C  | -0.41391 | -4.26795 | 2.19308  |
| C  | -1.65711 | -3.64400 | 2.27659  |
| C  | 1.03355  | 2.61112  | -0.42377 |
| C  | 2.20514  | 3.30305  | -0.01360 |
| C  | 3.09813  | 3.76922  | -1.02060 |
| C  | 2.77509  | 3.56139  | -2.38255 |
| C  | 1.61299  | 2.93817  | -2.75435 |
| C  | 0.73585  | 2.46670  | -1.75874 |
| C  | 2.52516  | 3.52973  | 1.34667  |
| C  | 3.68675  | 4.17738  | 1.68794  |
| C  | 4.58185  | 4.62558  | 0.69252  |
| C  | 4.29007  | 4.42618  | -0.63258 |
| H  | -0.27165 | 0.20075  | 4.05383  |
| H  | -2.50188 | -0.31896 | 4.54201  |
| H  | -3.15843 | -1.03604 | 1.66504  |
| H  | -3.78895 | -1.82235 | 3.13388  |
| H  | 1.62717  | -1.66609 | 3.02490  |
| H  | 1.72448  | -4.07114 | 2.38645  |
| H  | -0.35877 | -5.32209 | 1.92763  |
| H  | -2.56953 | -4.20421 | 2.07621  |
| H  | 3.46627  | 3.91978  | -3.14445 |
| H  | 1.35319  | 2.79604  | -3.80009 |
| Cl | -0.75217 | 1.71279  | -2.25743 |
| H  | 1.83708  | 3.19830  | 2.12338  |
| H  | 3.91753  | 4.35422  | 2.73672  |
| H  | 5.49744  | 5.13729  | 0.98095  |
| H  | 4.96899  | 4.77488  | -1.40998 |
| Au | 1.05026  | -0.97393 | -0.02382 |

---

|   |          |          |          |
|---|----------|----------|----------|
| C | 1.67123  | -2.56276 | -1.15775 |
| C | 3.04462  | -2.58847 | -1.45359 |
| C | 0.81883  | -3.55007 | -1.62199 |
| C | 3.54375  | -3.61050 | -2.25793 |
| C | 1.33392  | -4.57097 | -2.42678 |
| H | -0.23807 | -3.54376 | -1.35609 |
| C | 2.68664  | -4.59290 | -2.74714 |
| H | 4.60503  | -3.65021 | -2.50278 |
| H | 0.67177  | -5.35018 | -2.80081 |
| H | 3.08231  | -5.38760 | -3.37677 |
| C | 3.06640  | -0.65420 | -0.00427 |
| C | 3.66658  | 0.34288  | 0.74148  |
| C | 3.81555  | -1.52644 | -0.81392 |
| C | 5.04967  | 0.52205  | 0.65007  |
| H | 3.08071  | 0.99338  | 1.38722  |
| C | 5.19386  | -1.33254 | -0.88956 |
| C | 5.80399  | -0.30810 | -0.16977 |
| H | 5.52579  | 1.31930  | 1.21940  |
| H | 5.80052  | -1.99159 | -1.51036 |
| H | 6.88066  | -0.16728 | -0.24337 |
| O | -1.14554 | -1.44276 | -0.17065 |
| C | -3.19878 | -1.12351 | -1.27514 |
| C | -1.79818 | -1.22508 | -1.22273 |
| C | -5.13966 | -0.25995 | -2.58076 |
| C | -3.79631 | -0.61876 | -2.41656 |
| C | -6.12610 | -0.42451 | -1.60061 |
| H | -1.25561 | -1.08488 | -2.17870 |
| H | -3.13699 | -0.44292 | -3.27256 |
| H | -3.76589 | -1.34032 | -0.36922 |
| C | -7.57134 | -0.42030 | -2.00980 |
| H | -5.89234 | -1.09762 | -0.77351 |
| H | -5.43585 | 0.17195  | -3.53777 |
| H | -8.25521 | -0.32197 | -1.15975 |
| H | -7.78998 | 0.38047  | -2.72793 |
| H | -7.80553 | -1.37194 | -2.50692 |
| C | -6.06859 | 1.29660  | -0.41916 |

---

|   |          |         |          |
|---|----------|---------|----------|
| C | -4.86477 | 1.20795 | 0.27749  |
| C | -3.84452 | 1.88499 | -0.44272 |
| C | -4.39830 | 2.48303 | -1.53840 |
| C | -5.88101 | 2.36075 | -1.47018 |
| H | -7.02977 | 1.12600 | 0.06325  |
| H | -4.71266 | 0.68482 | 1.21996  |
| H | -2.78689 | 1.88018 | -0.17866 |
| H | -3.86841 | 3.05994 | -2.29114 |
| H | -6.29206 | 3.30436 | -1.06790 |
| H | -6.38220 | 2.19505 | -2.42985 |
| C | -2.27877 | 2.18447 | 3.14198  |
| H | -1.91669 | 2.35163 | 4.17167  |
| H | -2.92039 | 3.02547 | 2.86170  |
| O | -3.04171 | 1.00040 | 3.04658  |

Bottom, away, 1, exo, towards

M06/lanl2dz-6-31G(d) Energy = -2646.114604

M06/lanl2dz-6-31G(d) Free Energy = -2645.475219

M06/def2-TZVP Derived free energy = -2646.585497

M06/def2-TZVP Derived free energy in solution (toluene) = -2646.616502

M06/def2-TZVP Derived free energy in solution (nitromethane) = -2646.641659

Number of Imaginary Frequencies = 1 (-371.45)

M06/lanl2dz-6-31G(d) Geometry

|   |         |          |          |
|---|---------|----------|----------|
| C | 3.87149 | -1.41032 | -0.89913 |
| C | 4.58468 | -2.72645 | -1.25880 |
| C | 2.95075 | -2.88696 | 0.93445  |
| N | 2.89404 | -1.73803 | 0.17399  |
| C | 1.79938 | -1.03757 | 0.54903  |
| N | 1.26254 | -1.79342 | 1.51615  |
| N | 1.95996 | -2.94817 | 1.77202  |
| C | 3.62684 | -3.41476 | -2.25262 |
| C | 3.01462 | -2.23019 | -2.94778 |
| C | 3.19501 | -1.06692 | -2.19195 |
| C | 2.80825 | 0.17736  | -2.67496 |

---

|    |          |          |          |
|----|----------|----------|----------|
| C  | 2.15829  | 0.24009  | -3.90588 |
| C  | 1.93850  | -0.92249 | -4.64378 |
| C  | 2.38193  | -2.16086 | -4.18197 |
| C  | -0.00048 | -1.57308 | 2.14121  |
| C  | -0.14034 | -0.54036 | 3.10712  |
| C  | -1.43062 | -0.31897 | 3.67319  |
| C  | -2.50699 | -1.15263 | 3.28598  |
| C  | -2.34147 | -2.15218 | 2.36296  |
| C  | -1.07608 | -2.35400 | 1.77460  |
| C  | 0.93725  | 0.27886  | 3.51767  |
| C  | 0.73801  | 1.29096  | 4.42246  |
| C  | -0.53962 | 1.51947  | 4.97663  |
| C  | -1.59755 | 0.72484  | 4.61447  |
| H  | 4.55107  | -0.64209 | -0.50887 |
| H  | 5.50451  | -2.45643 | -1.79255 |
| H  | 2.85954  | -4.01049 | -1.73248 |
| H  | 4.15527  | -4.09894 | -2.92705 |
| H  | 3.03216  | 1.08899  | -2.11981 |
| H  | 1.83893  | 1.20359  | -4.29869 |
| H  | 1.43978  | -0.85786 | -5.60916 |
| H  | 2.24392  | -3.05634 | -4.78643 |
| H  | -3.48412 | -0.99004 | 3.74130  |
| H  | -3.16812 | -2.79239 | 2.06291  |
| Cl | -0.91622 | -3.57461 | 0.55298  |
| H  | 1.92869  | 0.10588  | 3.10645  |
| H  | 1.57703  | 1.91925  | 4.71603  |
| H  | -0.67946 | 2.32113  | 5.69854  |
| H  | -2.58521 | 0.88235  | 5.04729  |
| Au | 0.98150  | 0.80627  | -0.21089 |
| C  | 0.25644  | 2.58180  | -0.94688 |
| C  | 0.96234  | 3.72644  | -0.53742 |
| C  | -0.81528 | 2.68696  | -1.81951 |
| C  | 0.55041  | 4.97923  | -0.98776 |
| C  | -1.21578 | 3.94846  | -2.26916 |
| H  | -1.33741 | 1.79683  | -2.17004 |
| C  | -0.53951 | 5.08739  | -1.84681 |

---

|   |          |          |          |
|---|----------|----------|----------|
| H | 1.08352  | 5.87878  | -0.68059 |
| H | -2.05375 | 4.03720  | -2.95926 |
| H | -0.85399 | 6.06841  | -2.19807 |
| C | 2.36053  | 2.09188  | 0.58255  |
| C | 3.44663  | 1.69336  | 1.34563  |
| C | 2.11624  | 3.45202  | 0.31652  |
| C | 4.30862  | 2.65884  | 1.87277  |
| H | 3.64032  | 0.63971  | 1.54838  |
| C | 2.98769  | 4.40003  | 0.85223  |
| C | 4.07369  | 4.00641  | 1.62745  |
| H | 5.16250  | 2.34994  | 2.47308  |
| H | 2.81887  | 5.45937  | 0.66031  |
| H | 4.74483  | 4.75836  | 2.03778  |
| O | -0.66534 | -0.42271 | -1.05875 |
| C | -2.94890 | -1.00024 | -1.00937 |
| C | -1.81924 | -0.29043 | -0.57383 |
| C | -5.37123 | -1.45599 | -0.65558 |
| C | -4.16514 | -0.79383 | -0.38963 |
| C | -6.51439 | -1.31782 | 0.15402  |
| H | -1.97799 | 0.43422  | 0.25219  |
| H | -4.18526 | -0.06119 | 0.42749  |
| H | -2.83124 | -1.73096 | -1.81012 |
| C | -7.51089 | -2.44688 | 0.19977  |
| H | -6.34874 | -0.82666 | 1.11680  |
| H | -5.39310 | -2.17624 | -1.47755 |
| H | -7.78096 | -2.78642 | -0.80885 |
| H | -7.07120 | -3.30597 | 0.72417  |
| H | -8.43064 | -2.17538 | 0.72940  |
| C | -7.66880 | 0.13371  | -0.67026 |
| C | -6.99063 | 1.31109  | -0.33656 |
| C | -6.00635 | 1.58068  | -1.31131 |
| C | -6.12922 | 0.66278  | -2.32555 |
| C | -7.38054 | -0.11448 | -2.12953 |
| H | -8.63009 | -0.12131 | -0.22617 |
| H | -7.12742 | 1.86885  | 0.58676  |
| H | -5.24569 | 2.35347  | -1.24262 |

---

|   |          |          |          |
|---|----------|----------|----------|
| H | -5.49399 | 0.59374  | -3.20430 |
| H | -8.18197 | 0.37666  | -2.71125 |
| H | -7.35128 | -1.15851 | -2.45722 |
| C | 3.99242  | -3.92824 | 0.69936  |
| H | 4.45974  | -4.22007 | 1.64653  |
| H | 3.50820  | -4.82975 | 0.28607  |
| O | 5.01263  | -3.45626 | -0.13875 |

M06/lanl2dz-6-31G(d) Energy = -2646.114604

M06/lanl2dz-6-31G(d) Free Energy = -2645.475220

M06/def2-TZVP Derived free energy = -2646.585498

M06/def2-TZVP Derived free energy in solution (toluene) = -2646.616503

M06/def2-TZVP Derived free energy in solution (nitromethane) = -2646.641660

Number of Imaginary Frequencies = 1 (-371.46)

M06/lanl2dz-6-31G(d) Geometry

|   |          |          |          |
|---|----------|----------|----------|
| C | 3.87147  | -1.41034 | -0.89915 |
| C | 4.58462  | -2.72648 | -1.25885 |
| C | 2.95073  | -2.88700 | 0.93441  |
| N | 2.89402  | -1.73806 | 0.17397  |
| C | 1.79937  | -1.03759 | 0.54902  |
| N | 1.26253  | -1.79345 | 1.51613  |
| N | 1.95994  | -2.94821 | 1.77198  |
| C | 3.62673  | -3.41476 | -2.25266 |
| C | 3.01455  | -2.23016 | -2.94780 |
| C | 3.19498  | -1.06690 | -2.19196 |
| C | 2.80826  | 0.17740  | -2.67495 |
| C | 2.15828  | 0.24016  | -3.90586 |
| C | 1.93845  | -0.92241 | -4.64377 |
| C | 2.38184  | -2.16080 | -4.18198 |
| C | -0.00049 | -1.57310 | 2.14120  |
| C | -0.14033 | -0.54038 | 3.10712  |
| C | -1.43061 | -0.31899 | 3.67319  |
| C | -2.50699 | -1.15264 | 3.28599  |
| C | -2.34148 | -2.15218 | 2.36295  |
| C | -1.07610 | -2.35401 | 1.77459  |

---

|    |          |          |          |
|----|----------|----------|----------|
| C  | 0.93727  | 0.27882  | 3.51768  |
| C  | 0.73804  | 1.29091  | 4.42248  |
| C  | -0.53958 | 1.51943  | 4.97666  |
| C  | -1.59752 | 0.72481  | 4.61449  |
| H  | 4.55108  | -0.64214 | -0.50888 |
| H  | 5.50445  | -2.45648 | -1.79262 |
| H  | 2.85942  | -4.01045 | -1.73250 |
| H  | 4.15513  | -4.09896 | -2.92710 |
| H  | 3.03220  | 1.08901  | -2.11979 |
| H  | 1.83895  | 1.20368  | -4.29866 |
| H  | 1.43971  | -0.85775 | -5.60914 |
| H  | 2.24378  | -3.05626 | -4.78644 |
| H  | -3.48411 | -0.99005 | 3.74131  |
| H  | -3.16814 | -2.79239 | 2.06291  |
| Cl | -0.91625 | -3.57460 | 0.55295  |
| H  | 1.92870  | 0.10583  | 3.10644  |
| H  | 1.57707  | 1.91918  | 4.71606  |
| H  | -0.67941 | 2.32107  | 5.69858  |
| H  | -2.58518 | 0.88232  | 5.04732  |
| Au | 0.98151  | 0.80627  | -0.21089 |
| C  | 0.25646  | 2.58181  | -0.94685 |
| C  | 0.96238  | 3.72644  | -0.53738 |
| C  | -0.81526 | 2.68699  | -1.81948 |
| C  | 0.55046  | 4.97924  | -0.98769 |
| C  | -1.21575 | 3.94851  | -2.26910 |
| H  | -1.33740 | 1.79688  | -2.17002 |
| C  | -0.53946 | 5.08743  | -1.84673 |
| H  | 1.08358  | 5.87879  | -0.68051 |
| H  | -2.05372 | 4.03727  | -2.95920 |
| H  | -0.85394 | 6.06846  | -2.19798 |
| C  | 2.36056  | 2.09185  | 0.58256  |
| C  | 3.44666  | 1.69331  | 1.34563  |
| C  | 2.11628  | 3.45200  | 0.31655  |
| C  | 4.30867  | 2.65877  | 1.87276  |
| H  | 3.64035  | 0.63965  | 1.54835  |
| C  | 2.98775  | 4.39999  | 0.85226  |



---

|   |          |          |          |
|---|----------|----------|----------|
| C | 4.07376  | 4.00635  | 1.62747  |
| H | 5.16256  | 2.34986  | 2.47306  |
| H | 2.81893  | 5.45933  | 0.66036  |
| H | 4.74491  | 4.75829  | 2.03779  |
| O | -0.66534 | -0.42269 | -1.05876 |
| C | -2.94890 | -1.00021 | -1.00939 |
| C | -1.81924 | -0.29041 | -0.57383 |
| C | -5.37124 | -1.45596 | -0.65558 |
| C | -4.16514 | -0.79380 | -0.38963 |
| C | -6.51439 | -1.31779 | 0.15401  |
| H | -1.97799 | 0.43422  | 0.25220  |
| H | -4.18525 | -0.06119 | 0.42751  |
| H | -2.83126 | -1.73090 | -1.81016 |
| C | -7.51089 | -2.44685 | 0.19976  |
| H | -6.34873 | -0.82664 | 1.11679  |
| H | -5.39311 | -2.17620 | -1.47757 |
| H | -7.78097 | -2.78639 | -0.80886 |
| H | -7.07121 | -3.30593 | 0.72417  |
| H | -8.43064 | -2.17535 | 0.72939  |
| C | -7.66880 | 0.13375  | -0.67026 |
| C | -6.99063 | 1.31113  | -0.33654 |
| C | -6.00634 | 1.58072  | -1.31128 |
| C | -6.12920 | 0.66283  | -2.32553 |
| C | -7.38053 | -0.11443 | -2.12953 |
| H | -8.63010 | -0.12128 | -0.22618 |
| H | -7.12743 | 1.86887  | 0.58678  |
| H | -5.24568 | 2.35350  | -1.24257 |
| H | -5.49396 | 0.59379  | -3.20427 |
| H | -8.18196 | 0.37672  | -2.71125 |
| H | -7.35128 | -1.15845 | -2.45723 |
| O | 5.01259  | -3.45632 | -0.13882 |
| C | 3.99238  | -3.92828 | 0.69931  |
| H | 4.45972  | -4.22011 | 1.64647  |
| H | 3.50815  | -4.82979 | 0.28603  |

M06/lanl2dz-6-31G(d) Energy = -2646.116403

---

M06/lanl2dz-6-31G(d) Free Energy = -2645.479329  
M06/def2-TZVP Derived free energy = -2646.591439  
M06/def2-TZVP Derived free energy in solution (toluene) = -2646.622968  
M06/def2-TZVP Derived free energy in solution (nitromethane) = -2646.649015  
Number of Imaginary Frequencies = 1 (-368.00)

M06/lanl2dz-6-31G(d) Geometry

|   |          |          |          |
|---|----------|----------|----------|
| C | 3.87623  | -1.06974 | -0.50339 |
| C | 5.24229  | -1.70163 | -0.16347 |
| C | 3.15907  | -2.14558 | 1.64201  |
| N | 2.94603  | -1.26212 | 0.60954  |
| C | 1.73037  | -0.69752 | 0.77123  |
| N | 1.27154  | -1.27134 | 1.89012  |
| N | 2.14270  | -2.17644 | 2.45097  |
| C | 5.85389  | -1.97845 | -1.53316 |
| C | 4.64803  | -2.25844 | -2.38958 |
| C | 3.49042  | -1.76966 | -1.78172 |
| C | 2.24058  | -1.94375 | -2.35915 |
| C | 2.16824  | -2.60774 | -3.58319 |
| C | 3.32204  | -3.08100 | -4.20447 |
| C | 4.57133  | -2.91323 | -3.60971 |
| C | -0.05220 | -1.13957 | 2.40124  |
| C | -0.39081 | -0.01810 | 3.20295  |
| C | -1.73075 | 0.08176  | 3.68209  |
| C | -2.65790 | -0.93851 | 3.35934  |
| C | -2.30468 | -2.00824 | 2.57851  |
| C | -0.98723 | -2.10189 | 2.08465  |
| C | 0.53530  | 1.00003  | 3.53207  |
| C | 0.14347  | 2.07534  | 4.28995  |
| C | -1.18208 | 2.17852  | 4.76425  |
| C | -2.09590 | 1.19905  | 4.46947  |
| H | 3.98237  | 0.01772  | -0.65036 |
| H | 5.85578  | -1.05015 | 0.48391  |
| H | 6.56235  | -2.81356 | -1.47313 |
| H | 6.40937  | -1.09645 | -1.88590 |
| H | 1.32521  | -1.60413 | -1.87022 |

---

|    |          |          |          |
|----|----------|----------|----------|
| H  | 1.19880  | -2.76307 | -4.05265 |
| H  | 3.24539  | -3.59985 | -5.15820 |
| H  | 5.46862  | -3.30530 | -4.08680 |
| H  | -3.67380 | -0.86095 | 3.74710  |
| H  | -3.01874 | -2.78698 | 2.32050  |
| Cl | -0.57522 | -3.42821 | 1.04791  |
| H  | 1.56274  | 0.92670  | 3.18026  |
| H  | 0.86421  | 2.85422  | 4.53040  |
| H  | -1.47306 | 3.03533  | 5.36810  |
| H  | -3.11924 | 1.26442  | 4.83829  |
| Au | 0.78284  | 0.87006  | -0.36345 |
| C  | -0.03794 | 2.41139  | -1.44462 |
| C  | 0.60952  | 3.64967  | -1.29540 |
| C  | -1.12561 | 2.28065  | -2.29349 |
| C  | 0.13425  | 4.75693  | -1.99449 |
| C  | -1.59277 | 3.39837  | -2.99123 |
| H  | -1.60698 | 1.31388  | -2.43855 |
| C  | -0.96706 | 4.62965  | -2.83666 |
| H  | 0.62287  | 5.72569  | -1.89148 |
| H  | -2.44237 | 3.30011  | -3.66569 |
| H  | -1.33056 | 5.49802  | -3.38288 |
| C  | 2.06273  | 2.37253  | 0.16645  |
| C  | 3.12023  | 2.21431  | 1.04814  |
| C  | 1.76123  | 3.62633  | -0.39615 |
| C  | 3.90993  | 3.31911  | 1.37895  |
| H  | 3.34285  | 1.24503  | 1.49537  |
| C  | 2.56280  | 4.71480  | -0.05532 |
| C  | 3.62973  | 4.56173  | 0.82506  |
| H  | 4.74063  | 3.20047  | 2.07225  |
| H  | 2.35234  | 5.69649  | -0.47855 |
| H  | 4.24383  | 5.42258  | 1.08206  |
| O  | -0.75560 | -0.61311 | -0.96193 |
| C  | -2.98517 | -1.35808 | -0.83248 |
| C  | -1.92603 | -0.50005 | -0.50929 |
| C  | -5.40768 | -1.85815 | -0.54324 |
| C  | -4.24296 | -1.11645 | -0.31222 |

---

|   |          |          |          |
|---|----------|----------|----------|
| C | -6.61925 | -1.61973 | 0.13435  |
| H | -2.15476 | 0.33485  | 0.18526  |
| H | -4.33692 | -0.26524 | 0.37463  |
| H | -2.79281 | -2.19920 | -1.49950 |
| C | -7.60191 | -2.75203 | 0.28171  |
| H | -6.54438 | -0.97348 | 1.01283  |
| H | -5.35178 | -2.70026 | -1.23815 |
| H | -7.77599 | -3.26108 | -0.67551 |
| H | -7.20085 | -3.49968 | 0.97918  |
| H | -8.56851 | -2.42127 | 0.67696  |
| C | -7.71189 | -0.35698 | -1.01593 |
| C | -7.09092 | 0.88058  | -0.81204 |
| C | -6.02393 | 1.02854  | -1.72407 |
| C | -6.03459 | -0.03864 | -2.58870 |
| C | -7.28287 | -0.81831 | -2.38585 |
| H | -8.70690 | -0.56974 | -0.62727 |
| H | -7.32512 | 1.57031  | -0.00476 |
| H | -5.28791 | 1.82789  | -1.71098 |
| H | -5.31430 | -0.22484 | -3.38072 |
| H | -8.03532 | -0.45202 | -3.10804 |
| H | -7.20139 | -1.89897 | -2.53964 |
| C | 4.46484  | -2.85940 | 1.73502  |
| H | 5.12650  | -2.31810 | 2.43714  |
| H | 4.32262  | -3.87330 | 2.12207  |
| O | 5.04825  | -2.95599 | 0.46515  |

M06/lanl2dz-6-31G(d) Energy = -2646.114604

M06/lanl2dz-6-31G(d) Free Energy = -2645.475219

M06/def2-TZVP Derived free energy = -2646.585497

M06/def2-TZVP Derived free energy in solution (toluene) = -2646.616502

M06/def2-TZVP Derived free energy in solution (nitromethane) = -2646.641659

Number of Imaginary Frequencies = 1 (-371.46)

M06/lanl2dz-6-31G(d) Geometry

|   |         |          |          |
|---|---------|----------|----------|
| C | 3.87148 | -1.41033 | -0.89914 |
| C | 4.58466 | -2.72647 | -1.25880 |

---

|    |          |          |          |
|----|----------|----------|----------|
| C  | 2.95078  | -2.88693 | 0.93448  |
| N  | 2.89405  | -1.73802 | 0.17400  |
| C  | 1.79939  | -1.03755 | 0.54903  |
| N  | 1.26257  | -1.79339 | 1.51617  |
| N  | 1.96000  | -2.94813 | 1.77207  |
| C  | 3.62678  | -3.41481 | -2.25258 |
| C  | 3.01457  | -2.23025 | -2.94775 |
| C  | 3.19497  | -1.06696 | -2.19196 |
| C  | 2.80822  | 0.17731  | -2.67500 |
| C  | 2.15823  | 0.24001  | -3.90591 |
| C  | 1.93843  | -0.92259 | -4.64377 |
| C  | 2.38185  | -2.16095 | -4.18194 |
| C  | -0.00045 | -1.57304 | 2.14125  |
| C  | -0.14030 | -0.54029 | 3.10714  |
| C  | -1.43058 | -0.31889 | 3.67320  |
| C  | -2.50695 | -1.15257 | 3.28603  |
| C  | -2.34144 | -2.15214 | 2.36302  |
| C  | -1.07605 | -2.35397 | 1.77466  |
| C  | 0.93728  | 0.27894  | 3.51766  |
| C  | 0.73805  | 1.29106  | 4.42243  |
| C  | -0.53958 | 1.51958  | 4.97660  |
| C  | -1.59751 | 0.72494  | 4.61447  |
| H  | 4.55108  | -0.64211 | -0.50892 |
| H  | 5.50448  | -2.45648 | -1.79258 |
| H  | 2.85948  | -4.01051 | -1.73240 |
| H  | 4.15519  | -4.09902 | -2.92700 |
| H  | 3.03214  | 1.08895  | -2.11987 |
| H  | 1.83887  | 1.20350  | -4.29874 |
| H  | 1.43969  | -0.85798 | -5.60914 |
| H  | 2.24382  | -3.05644 | -4.78637 |
| H  | -3.48408 | -0.98998 | 3.74134  |
| H  | -3.16809 | -2.79236 | 2.06299  |
| Cl | -0.91619 | -3.57460 | 0.55307  |
| H  | 1.92872  | 0.10595  | 3.10644  |
| H  | 1.57707  | 1.91937  | 4.71597  |
| H  | -0.67942 | 2.32126  | 5.69848  |

---

|    |          |          |          |
|----|----------|----------|----------|
| H  | -2.58517 | 0.88245  | 5.04729  |
| Au | 0.98150  | 0.80627  | -0.21091 |
| C  | 0.25643  | 2.58178  | -0.94692 |
| C  | 0.96233  | 3.72643  | -0.53749 |
| C  | -0.81530 | 2.68692  | -1.81955 |
| C  | 0.55039  | 4.97921  | -0.98784 |
| C  | -1.21580 | 3.94842  | -2.26922 |
| H  | -1.33742 | 1.79679  | -2.17006 |
| C  | -0.53953 | 5.08736  | -1.84689 |
| H  | 1.08350  | 5.87878  | -0.68070 |
| H  | -2.05377 | 4.03714  | -2.95932 |
| H  | -0.85402 | 6.06837  | -2.19817 |
| C  | 2.36053  | 2.09189  | 0.58250  |
| C  | 3.44663  | 1.69339  | 1.34559  |
| C  | 2.11623  | 3.45203  | 0.31646  |
| C  | 4.30862  | 2.65888  | 1.87271  |
| H  | 3.64032  | 0.63974  | 1.54834  |
| C  | 2.98768  | 4.40005  | 0.85216  |
| C  | 4.07368  | 4.00644  | 1.62739  |
| H  | 5.16250  | 2.34999  | 2.47303  |
| H  | 2.81885  | 5.45939  | 0.66023  |
| H  | 4.74482  | 4.75840  | 2.03770  |
| O  | -0.66534 | -0.42273 | -1.05873 |
| C  | -2.94890 | -1.00027 | -1.00931 |
| C  | -1.81924 | -0.29044 | -0.57380 |
| C  | -5.37123 | -1.45602 | -0.65551 |
| C  | -4.16514 | -0.79384 | -0.38958 |
| C  | -6.51439 | -1.31783 | 0.15406  |
| H  | -1.97799 | 0.43423  | 0.25219  |
| H  | -4.18526 | -0.06118 | 0.42751  |
| H  | -2.83124 | -1.73102 | -1.81004 |
| C  | -7.51089 | -2.44688 | 0.19983  |
| H  | -6.34875 | -0.82666 | 1.11684  |
| H  | -5.39309 | -2.17629 | -1.47747 |
| H  | -7.78098 | -2.78643 | -0.80879 |
| H  | -7.07121 | -3.30597 | 0.72423  |

---

|   |          |          |          |
|---|----------|----------|----------|
| H | -8.43063 | -2.17538 | 0.72947  |
| C | -7.66879 | 0.13370  | -0.67024 |
| C | -6.99062 | 1.31108  | -0.33657 |
| C | -6.00635 | 1.58066  | -1.31133 |
| C | -6.12923 | 0.66274  | -2.32556 |
| C | -7.38054 | -0.11453 | -2.12951 |
| H | -8.63008 | -0.12131 | -0.22615 |
| H | -7.12739 | 1.86885  | 0.58674  |
| H | -5.24570 | 2.35344  | -1.24266 |
| H | -5.49401 | 0.59369  | -3.20432 |
| H | -8.18199 | 0.37658  | -2.71124 |
| H | -7.35127 | -1.15856 | -2.45717 |
| O | 5.01264  | -3.45626 | -0.13874 |
| C | 3.99244  | -3.92821 | 0.69941  |
| H | 4.45979  | -4.22002 | 1.64658  |
| H | 3.50822  | -4.82974 | 0.28616  |

Top, towards, 1, exo, towards

M06/lanl2dz-6-31G(d) Energy = -2646.112886

M06/lanl2dz-6-31G(d) Free Energy = -2645.476071

M06/def2-TZVP Derived free energy = -2646.588627

M06/def2-TZVP Derived free energy in solution (toluene) = -2646.619972

M06/def2-TZVP Derived free energy in solution (nitromethane) = -2646.645966

Number of Imaginary Frequencies = 1 (-375.11)

M06/lanl2dz-6-31G(d) Geometry

|   |          |         |          |
|---|----------|---------|----------|
| C | 1.07593  | 3.11115 | -0.30776 |
| C | 1.38859  | 4.48294 | -0.94077 |
| C | 1.31936  | 2.27714 | -2.65229 |
| N | 1.22678  | 2.04755 | -1.29839 |
| C | 1.20181  | 0.71001 | -1.08890 |
| N | 1.27644  | 0.20831 | -2.32758 |
| N | 1.35133  | 1.16125 | -3.31549 |
| C | 0.61706  | 5.46666 | -0.06346 |
| C | -0.56871 | 4.65824 | 0.39177  |

---

|    |          |          |          |
|----|----------|----------|----------|
| C  | -0.32473 | 3.29672  | 0.21236  |
| C  | -1.28150 | 2.34440  | 0.52239  |
| C  | -2.49752 | 2.77120  | 1.05224  |
| C  | -2.74223 | 4.12882  | 1.25269  |
| C  | -1.78137 | 5.08233  | 0.91680  |
| C  | 1.10209  | -1.16412 | -2.67141 |
| C  | 2.20736  | -2.05160 | -2.63364 |
| C  | 1.96963  | -3.42332 | -2.94190 |
| C  | 0.66126  | -3.83966 | -3.28410 |
| C  | -0.38782 | -2.95768 | -3.31727 |
| C  | -0.15953 | -1.60596 | -3.00031 |
| C  | 3.51786  | -1.63763 | -2.29593 |
| C  | 4.54265  | -2.55011 | -2.25726 |
| C  | 4.31088  | -3.90981 | -2.55745 |
| C  | 3.05163  | -4.33414 | -2.89586 |
| H  | 1.78147  | 2.89849  | 0.51140  |
| H  | 2.47355  | 4.68095  | -0.99376 |
| H  | 0.35181  | 6.36221  | -0.63834 |
| H  | 1.23698  | 5.78889  | 0.78644  |
| H  | -1.09584 | 1.28766  | 0.33120  |
| H  | -3.25903 | 2.03452  | 1.31183  |
| H  | -3.69590 | 4.45188  | 1.66646  |
| H  | -1.98660 | 6.14293  | 1.05553  |
| H  | 0.49399  | -4.88935 | -3.52347 |
| H  | -1.39229 | -3.27893 | -3.58122 |
| Cl | -1.50338 | -0.50169 | -3.00258 |
| H  | 3.71102  | -0.58962 | -2.07257 |
| H  | 5.54630  | -2.22163 | -1.99509 |
| H  | 5.13608  | -4.61759 | -2.52160 |
| H  | 2.86142  | -5.38042 | -3.13300 |
| Au | 1.23413  | -0.40403 | 0.77261  |
| C  | 1.34681  | -1.35832 | 2.58838  |
| C  | 2.45165  | -0.99353 | 3.37796  |
| C  | 0.42299  | -2.28067 | 3.05110  |
| C  | 2.59567  | -1.54780 | 4.64747  |
| C  | 0.57935  | -2.83198 | 4.32617  |



---

|   |          |          |          |
|---|----------|----------|----------|
| H | -0.41505 | -2.59466 | 2.43116  |
| C | 1.65749  | -2.46081 | 5.12048  |
| H | 3.44509  | -1.27585 | 5.27379  |
| H | -0.14416 | -3.55815 | 4.69320  |
| H | 1.77655  | -2.89144 | 6.11291  |
| C | 3.02734  | 0.32841  | 1.43067  |
| C | 3.86053  | 1.13808  | 0.67446  |
| C | 3.38039  | -0.06970 | 2.73247  |
| C | 5.06179  | 1.59323  | 1.22588  |
| H | 3.60118  | 1.41871  | -0.34630 |
| C | 4.57967  | 0.40064  | 3.26620  |
| C | 5.41152  | 1.22984  | 2.51995  |
| H | 5.71999  | 2.22767  | 0.63486  |
| H | 4.87593  | 0.10753  | 4.27289  |
| H | 6.34537  | 1.58573  | 2.95067  |
| O | -0.67736 | -1.36633 | 0.17171  |
| C | -2.99354 | -1.73324 | 0.29491  |
| C | -1.79228 | -1.14364 | 0.71063  |
| C | -5.44400 | -1.95189 | 0.63212  |
| C | -4.18602 | -1.40412 | 0.91033  |
| C | -6.59453 | -1.65601 | 1.38559  |
| H | -1.84767 | -0.44840 | 1.57490  |
| H | -4.14357 | -0.66098 | 1.71748  |
| H | -2.95803 | -2.45246 | -0.52472 |
| C | -7.68952 | -2.68571 | 1.47683  |
| H | -6.41630 | -1.10510 | 2.31282  |
| H | -5.50898 | -2.70922 | -0.15341 |
| H | -7.94757 | -3.08930 | 0.48891  |
| H | -7.34777 | -3.52826 | 2.09296  |
| H | -8.60190 | -2.29229 | 1.93803  |
| C | -7.59338 | -0.18374 | 0.39260  |
| C | -6.83170 | 0.95928  | 0.65469  |
| C | -5.79712 | 1.06681  | -0.30115 |
| C | -5.96127 | 0.07676  | -1.23841 |
| C | -7.27700 | -0.58004 | -1.02736 |
| H | -8.58621 | -0.32245 | 0.81822  |

---

|   |          |          |          |
|---|----------|----------|----------|
| H | -6.95459 | 1.60430  | 1.52141  |
| H | -4.98226 | 1.78603  | -0.27759 |
| H | -5.30353 | -0.12175 | -2.08027 |
| H | -8.01509 | -0.07934 | -1.68044 |
| H | -7.32356 | -1.64723 | -1.26617 |
| O | 0.82190  | 4.55579  | -2.23536 |
| C | 1.41613  | 3.67774  | -3.15386 |
| H | 2.47834  | 3.93660  | -3.32082 |
| H | 0.89187  | 3.78067  | -4.10909 |

M06/lanl2dz-6-31G(d) Energy = -2646.111661

M06/lanl2dz-6-31G(d) Free Energy = -2645.473139

M06/def2-TZVP Derived free energy = -2646.583813

M06/def2-TZVP Derived free energy in solution (toluene) = -2646.614862

M06/def2-TZVP Derived free energy in solution (nitromethane) = -2646.640289

Number of Imaginary Frequencies = 1 (-380.07)

M06/lanl2dz-6-31G(d) Geometry

|   |          |          |          |
|---|----------|----------|----------|
| C | 3.46341  | -1.65488 | 0.04781  |
| C | 4.58360  | -2.55470 | 0.62425  |
| C | 2.34637  | -2.21511 | 2.22666  |
| N | 2.39429  | -1.50080 | 1.04897  |
| C | 1.34612  | -0.64185 | 1.03107  |
| N | 0.72356  | -0.89177 | 2.19413  |
| N | 1.33205  | -1.86075 | 2.95419  |
| C | 5.24787  | -3.15799 | -0.60704 |
| C | 4.13104  | -3.20426 | -1.61200 |
| C | 3.09296  | -2.34945 | -1.23839 |
| C | 1.98510  | -2.17816 | -2.05695 |
| C | 1.90519  | -2.90526 | -3.24241 |
| C | 2.93078  | -3.77593 | -3.60536 |
| C | 4.05470  | -3.92408 | -2.79606 |
| C | -0.46784 | -0.26716 | 2.66958  |
| C | -0.43273 | 1.10651  | 3.03823  |
| C | -1.64309 | 1.71721  | 3.48117  |
| C | -2.81607 | 0.93320  | 3.57995  |

---

|    |          |          |          |
|----|----------|----------|----------|
| C  | -2.81679 | -0.39570 | 3.24391  |
| C  | -1.63241 | -0.99662 | 2.77256  |
| C  | 0.74400  | 1.88983  | 2.98748  |
| C  | 0.71408  | 3.22109  | 3.32017  |
| C  | -0.48693 | 3.83139  | 3.73976  |
| C  | -1.63726 | 3.08949  | 3.82589  |
| H  | 3.85191  | -0.64324 | -0.15146 |
| H  | 5.27170  | -1.98897 | 1.27682  |
| H  | 5.67655  | -4.13769 | -0.36319 |
| H  | 6.06987  | -2.51493 | -0.95495 |
| H  | 1.19176  | -1.47765 | -1.79534 |
| H  | 1.03953  | -2.78614 | -3.89094 |
| H  | 2.85669  | -4.33960 | -4.53331 |
| H  | 4.86014  | -4.59712 | -3.08691 |
| H  | -3.73052 | 1.40180  | 3.94401  |
| H  | -3.71337 | -1.00407 | 3.34176  |
| Cl | -1.68893 | -2.67368 | 2.32236  |
| H  | 1.68325  | 1.43487  | 2.68375  |
| H  | 1.62980  | 3.80701  | 3.26419  |
| H  | -0.49412 | 4.88654  | 4.00361  |
| H  | -2.56795 | 3.54344  | 4.16506  |
| Au | 0.75032  | 0.82727  | -0.45173 |
| C  | 0.25258  | 2.18691  | -1.90214 |
| C  | 1.21232  | 3.18027  | -2.15192 |
| C  | -0.92559 | 2.13001  | -2.62591 |
| C  | 0.96813  | 4.12264  | -3.14835 |
| C  | -1.15745 | 3.08055  | -3.62415 |
| H  | -1.65918 | 1.35077  | -2.42079 |
| C  | -0.21471 | 4.06967  | -3.88072 |
| H  | 1.69897  | 4.90279  | -3.36007 |
| H  | -2.07879 | 3.04476  | -4.20359 |
| H  | -0.39850 | 4.80782  | -4.65916 |
| C  | 2.39519  | 2.04683  | -0.36750 |
| C  | 3.43220  | 1.89269  | 0.53919  |
| C  | 2.39110  | 3.10653  | -1.29331 |
| C  | 4.50241  | 2.79211  | 0.52402  |

---

|   |          |          |          |
|---|----------|----------|----------|
| H | 3.42474  | 1.08732  | 1.27457  |
| C | 3.47030  | 3.98945  | -1.29741 |
| C | 4.51947  | 3.83186  | -0.39722 |
| H | 5.31650  | 2.67413  | 1.23694  |
| H | 3.48961  | 4.81707  | -2.00592 |
| H | 5.35327  | 4.53086  | -0.41259 |
| O | -1.20037 | -0.20376 | -0.68661 |
| C | -2.63101 | -2.02185 | -1.14312 |
| C | -1.40489 | -1.44728 | -0.77654 |
| C | -4.98393 | -1.71445 | -1.86939 |
| C | -3.72202 | -1.24415 | -1.49260 |
| C | -6.00700 | -0.88416 | -2.36418 |
| H | -0.57695 | -2.14458 | -0.54898 |
| H | -3.56706 | -0.16023 | -1.50319 |
| H | -2.70351 | -3.10906 | -1.14282 |
| C | -7.06491 | -1.48284 | -3.25280 |
| H | -5.69390 | 0.12113  | -2.65594 |
| H | -5.16308 | -2.79275 | -1.82863 |
| H | -7.46941 | -2.41379 | -2.83385 |
| H | -7.89770 | -0.79513 | -3.43573 |
| H | -6.62469 | -1.72950 | -4.22845 |
| C | -7.14267 | -0.34376 | -0.76201 |
| C | -6.37068 | 0.66683  | -0.17900 |
| C | -5.43800 | 0.09354  | 0.71263  |
| C | -5.68647 | -1.25470 | 0.79870  |
| C | -6.97148 | -1.55877 | 0.11579  |
| H | -8.08414 | -0.13200 | -1.26699 |
| H | -6.40489 | 1.71701  | -0.45865 |
| H | -4.61803 | 0.61801  | 1.19835  |
| H | -5.10527 | -1.97706 | 1.36774  |
| H | -7.03645 | -2.53678 | -0.37094 |
| H | -7.77650 | -1.53020 | 0.87285  |
| C | 3.39989  | -3.22157 | 2.53535  |
| H | 4.13373  | -2.78922 | 3.24080  |
| H | 2.95715  | -4.10309 | 3.01045  |
| O | 4.01748  | -3.63050 | 1.34801  |

---

M06/lanl2dz-6-31G(d) Energy = -2646.112885  
M06/lanl2dz-6-31G(d) Free Energy = -2645.476074  
M06/def2-TZVP Derived free energy = -2646.588631  
M06/def2-TZVP Derived free energy in solution (toluene) = -2646.619976  
M06/def2-TZVP Derived free energy in solution (nitromethane) = -2646.645971  
Number of Imaginary Frequencies = 1 (-375.04)

M06/lanl2dz-6-31G(d) Geometry

|   |          |          |          |
|---|----------|----------|----------|
| C | 1.07522  | 3.11115  | -0.30822 |
| C | 1.38772  | 4.48285  | -0.94150 |
| C | 1.31844  | 2.27677  | -2.65264 |
| N | 1.22605  | 2.04740  | -1.29869 |
| C | 1.20133  | 0.70989  | -1.08896 |
| N | 1.27593  | 0.20799  | -2.32757 |
| N | 1.35054  | 1.16077  | -3.31565 |
| C | 0.61628  | 5.46668  | -0.06424 |
| C | -0.56939 | 4.65828  | 0.39130  |
| C | -0.32539 | 3.29674  | 0.21205  |
| C | -1.28210 | 2.34444  | 0.52234  |
| C | -2.49806 | 2.77128  | 1.05229  |
| C | -2.74278 | 4.12892  | 1.25259  |
| C | -1.78199 | 5.08241  | 0.91642  |
| C | 1.10193  | -1.16454 | -2.67115 |
| C | 2.20751  | -2.05165 | -2.63349 |
| C | 1.97018  | -3.42349 | -2.94151 |
| C | 0.66188  | -3.84033 | -3.28335 |
| C | -0.38750 | -2.95870 | -3.31645 |
| C | -0.15959 | -1.60685 | -2.99977 |
| C | 3.51794  | -1.63718 | -2.29613 |
| C | 4.54306  | -2.54930 | -2.25758 |
| C | 4.31169  | -3.90912 | -2.55751 |
| C | 3.05251  | -4.33394 | -2.89558 |
| H | 1.78087  | 2.89867  | 0.51090  |
| H | 2.47266  | 4.68091  | -0.99471 |
| H | 0.35089  | 6.36211  | -0.63924 |

---

|    |          |          |          |
|----|----------|----------|----------|
| H  | 1.23630  | 5.78910  | 0.78551  |
| H  | -1.09644 | 1.28768  | 0.33127  |
| H  | -3.25953 | 2.03464  | 1.31215  |
| H  | -3.69640 | 4.45202  | 1.66643  |
| H  | -1.98724 | 6.14302  | 1.05503  |
| H  | 0.49490  | -4.89011 | -3.52252 |
| H  | -1.39192 | -3.28033 | -3.58014 |
| Cl | -1.50379 | -0.50301 | -3.00205 |
| H  | 3.71079  | -0.58907 | -2.07298 |
| H  | 5.54665  | -2.22044 | -1.99569 |
| H  | 5.13714  | -4.61661 | -2.52176 |
| H  | 2.86260  | -5.38032 | -3.13252 |
| Au | 1.23418  | -0.40386 | 0.77270  |
| C  | 1.34733  | -1.35790 | 2.58857  |
| C  | 2.45224  | -0.99285 | 3.37792  |
| C  | 0.42371  | -2.28032 | 3.05154  |
| C  | 2.59656  | -1.54696 | 4.64746  |
| C  | 0.58037  | -2.83147 | 4.32664  |
| H  | -0.41439 | -2.59450 | 2.43177  |
| C  | 1.65859  | -2.46006 | 5.12072  |
| H  | 3.44604  | -1.27480 | 5.27362  |
| H  | -0.14298 | -3.55770 | 4.69388  |
| H  | 1.77789  | -2.89056 | 6.11319  |
| C  | 3.02735  | 0.32901  | 1.43039  |
| C  | 3.86024  | 1.13877  | 0.67396  |
| C  | 3.38070  | -0.06891 | 2.73217  |
| C  | 5.06149  | 1.59424  | 1.22513  |
| H  | 3.60066  | 1.41925  | -0.34678 |
| C  | 4.57998  | 0.40174  | 3.26565  |
| C  | 5.41152  | 1.23104  | 2.51918  |
| H  | 5.71946  | 2.22876  | 0.63394  |
| H  | 4.87647  | 0.10879  | 4.27232  |
| H  | 6.34537  | 1.58718  | 2.94971  |
| O  | -0.67717 | -1.36670 | 0.17228  |
| C  | -2.99334 | -1.73367 | 0.29564  |
| C  | -1.79211 | -1.14378 | 0.71105  |

---

|   |          |          |          |
|---|----------|----------|----------|
| C | -5.44382 | -1.95209 | 0.63307  |
| C | -4.18580 | -1.40424 | 0.91091  |
| C | -6.59432 | -1.65555 | 1.38636  |
| H | -1.84757 | -0.44805 | 1.57492  |
| H | -4.14330 | -0.66065 | 1.71765  |
| H | -2.95780 | -2.45333 | -0.52360 |
| C | -7.68942 | -2.68508 | 1.47829  |
| H | -6.41601 | -1.10411 | 2.31326  |
| H | -5.50889 | -2.70993 | -0.15197 |
| H | -7.94694 | -3.08990 | 0.49074  |
| H | -7.34801 | -3.52687 | 2.09565  |
| H | -8.60203 | -2.29108 | 1.93852  |
| C | -7.59281 | -0.18373 | 0.39255  |
| C | -6.83066 | 0.95927  | 0.65346  |
| C | -5.79631 | 1.06564  | -0.30275 |
| C | -5.96109 | 0.07487  | -1.23915 |
| C | -7.27698 | -0.58130 | -1.02719 |
| H | -8.58560 | -0.32169 | 0.81853  |
| H | -6.95306 | 1.60506  | 1.51967  |
| H | -4.98111 | 1.78449  | -0.28000 |
| H | -5.30367 | -0.12462 | -2.08102 |
| H | -8.01511 | -0.08095 | -1.68048 |
| H | -7.32391 | -1.64868 | -1.26507 |
| C | 1.41491  | 3.67729  | -3.15449 |
| H | 2.47704  | 3.93626  | -3.32176 |
| H | 0.89040  | 3.77997  | -4.10961 |
| O | 0.82079  | 4.55544  | -2.23601 |

Bottom, towards, 1, exo, towards

M06/lanl2dz-6-31G(d) Energy = -2646.115731

M06/lanl2dz-6-31G(d) Free Energy = -2645.478412

M06/def2-TZVP Derived free energy = -2646.587557

M06/def2-TZVP Derived free energy in solution (toluene) = -2646.618574

M06/def2-TZVP Derived free energy in solution (nitromethane) = -2646.643442

Number of Imaginary Frequencies = 1 (-374.15)

---

M06/lanl2dz-6-31G(d) Geometry

|   |          |          |          |
|---|----------|----------|----------|
| C | -2.10976 | 2.67116  | -1.56610 |
| C | -2.42927 | 4.17745  | -1.50620 |
| C | -2.96962 | 2.80574  | 0.80350  |
| N | -2.26760 | 2.14885  | -0.18543 |
| C | -1.78517 | 0.99504  | 0.33558  |
| N | -2.22186 | 1.02035  | 1.60017  |
| N | -2.96024 | 2.13275  | 1.91463  |
| C | -1.10797 | 4.82176  | -1.03875 |
| C | -0.09158 | 3.90684  | -1.66248 |
| C | -0.67591 | 2.68168  | -2.00628 |
| C | 0.04020  | 1.70456  | -2.68716 |
| C | 1.38591  | 1.93950  | -2.96447 |
| C | 1.98305  | 3.14263  | -2.58819 |
| C | 1.24730  | 4.14146  | -1.95075 |
| C | -1.90018 | 0.05817  | 2.60351  |
| C | -2.62571 | -1.16061 | 2.66231  |
| C | -2.22904 | -2.12640 | 3.63320  |
| C | -1.16273 | -1.82566 | 4.51352  |
| C | -0.49467 | -0.63072 | 4.44981  |
| C | -0.86631 | 0.31620  | 3.47583  |
| C | -3.70851 | -1.45549 | 1.80147  |
| C | -4.34849 | -2.66701 | 1.88127  |
| C | -3.94807 | -3.63231 | 2.83016  |
| C | -2.91547 | -3.36230 | 3.69133  |
| H | -2.78945 | 2.10715  | -2.21750 |
| H | -2.63194 | 4.50378  | -2.53403 |
| H | -1.02292 | 4.81744  | 0.06018  |
| H | -1.01987 | 5.86625  | -1.35981 |
| H | -0.44182 | 0.78353  | -3.01665 |
| H | 1.96501  | 1.18575  | -3.49503 |
| H | 3.03194  | 3.31834  | -2.82241 |
| H | 1.71092  | 5.09504  | -1.70097 |
| H | -0.87588 | -2.56793 | 5.25762  |
| H | 0.32083  | -0.39738 | 5.12938  |



---

|    |          |          |          |
|----|----------|----------|----------|
| Cl | 0.01306  | 1.81234  | 3.39191  |
| H  | -4.04064 | -0.71230 | 1.07934  |
| H  | -5.17552 | -2.88285 | 1.20761  |
| H  | -4.46715 | -4.58694 | 2.88048  |
| H  | -2.60435 | -4.09531 | 4.43493  |
| Au | -0.61640 | -0.61350 | -0.50352 |
| C  | 0.42796  | -2.18253 | -1.31161 |
| C  | -0.28441 | -2.96181 | -2.23800 |
| C  | 1.74209  | -2.47890 | -0.99034 |
| C  | 0.35657  | -4.03380 | -2.85735 |
| C  | 2.37084  | -3.56141 | -1.61268 |
| H  | 2.27098  | -1.87686 | -0.25020 |
| C  | 1.68068  | -4.32845 | -2.54545 |
| H  | -0.17403 | -4.65091 | -3.58207 |
| H  | 3.40199  | -3.81235 | -1.36193 |
| H  | 2.17395  | -5.16865 | -3.03073 |
| C  | -2.07942 | -1.43024 | -1.67865 |
| C  | -3.37052 | -0.93534 | -1.77110 |
| C  | -1.67036 | -2.54300 | -2.43791 |
| C  | -4.28542 | -1.55235 | -2.62869 |
| H  | -3.68917 | -0.07578 | -1.18091 |
| C  | -2.59779 | -3.14480 | -3.28767 |
| C  | -3.89593 | -2.65307 | -3.38196 |
| H  | -5.30031 | -1.16586 | -2.70348 |
| H  | -2.30703 | -4.01007 | -3.88290 |
| H  | -4.60751 | -3.13351 | -4.05050 |
| O  | 1.18446  | 0.06335  | 0.59281  |
| C  | 2.93711  | 1.63463  | 0.76620  |
| C  | 1.61911  | 1.24438  | 0.47784  |
| C  | 5.24075  | 0.94786  | 1.42264  |
| C  | 3.88935  | 0.70960  | 1.15573  |
| C  | 6.09880  | -0.04752 | 1.92893  |
| H  | 0.93060  | 2.03189  | 0.11771  |
| H  | 3.53702  | -0.31951 | 1.28386  |
| H  | 3.19569  | 2.68548  | 0.63695  |
| C  | 7.32067  | 0.37176  | 2.70257  |

---

|   |          |          |          |
|---|----------|----------|----------|
| H | 5.59983  | -0.93540 | 2.32495  |
| H | 5.63211  | 1.95915  | 1.28137  |
| H | 8.00417  | -0.46173 | 2.89774  |
| H | 7.87805  | 1.16220  | 2.18264  |
| H | 7.01345  | 0.77780  | 3.67579  |
| C | 6.96899  | -0.95423 | 0.33902  |
| C | 5.94670  | -1.74557 | -0.19682 |
| C | 5.19189  | -0.98528 | -1.11757 |
| C | 5.79229  | 0.23995  | -1.26794 |
| C | 7.11391  | 0.22495  | -0.59064 |
| H | 7.82955  | -1.39413 | 0.84140  |
| H | 5.70368  | -2.75498 | 0.12838  |
| H | 4.26334  | -1.30030 | -1.58854 |
| H | 5.42511  | 1.05856  | -1.88126 |
| H | 7.88025  | -0.04064 | -1.34172 |
| H | 7.43223  | 1.17177  | -0.14271 |
| O | -3.59572 | 4.47730  | -0.78874 |
| C | -3.56144 | 4.15552  | 0.57697  |
| H | -2.99066 | 4.90084  | 1.15735  |
| H | -4.59352 | 4.18376  | 0.94303  |

M06/lanl2dz-6-31G(d) Energy = -2646.115731

M06/lanl2dz-6-31G(d) Free Energy = -2645.478411

M06/def2-TZVP Derived free energy = -2646.587555

M06/def2-TZVP Derived free energy in solution (toluene) = -2646.618573

M06/def2-TZVP Derived free energy in solution (nitromethane) = -2646.643442

Number of Imaginary Frequencies = 1 (-374.12)

M06/lanl2dz-6-31G(d) Geometry

|   |          |         |          |
|---|----------|---------|----------|
| C | -2.10926 | 2.67132 | -1.56656 |
| C | -2.42847 | 4.17767 | -1.50680 |
| C | -2.96913 | 2.80630 | 0.80301  |
| N | -2.26721 | 2.14917 | -0.18584 |
| C | -1.78494 | 0.99536 | 0.33533  |
| N | -2.22163 | 1.02091 | 1.59993  |
| N | -2.95985 | 2.13346 | 1.91422  |

---

|    |          |          |          |
|----|----------|----------|----------|
| C  | -1.10707 | 4.82176  | -1.03937 |
| C  | -0.09084 | 3.90658  | -1.66298 |
| C  | -0.67541 | 2.68152  | -2.00673 |
| C  | 0.04052  | 1.70420  | -2.68751 |
| C  | 1.38630  | 1.93882  | -2.96474 |
| C  | 1.98368  | 3.14184  | -2.58849 |
| C  | 1.24812  | 4.14088  | -1.95118 |
| C  | -1.90033 | 0.05872  | 2.60338  |
| C  | -2.62625 | -1.15982 | 2.66221  |
| C  | -2.23000 | -2.12566 | 3.63322  |
| C  | -1.16374 | -1.82515 | 4.51368  |
| C  | -0.49533 | -0.63041 | 4.44998  |
| C  | -0.86655 | 0.31654  | 3.47587  |
| C  | -3.70905 | -1.45443 | 1.80127  |
| C  | -4.34940 | -2.66574 | 1.88107  |
| C  | -3.94938 | -3.63110 | 2.83007  |
| C  | -2.91681 | -3.36134 | 3.69135  |
| H  | -2.78907 | 2.10738  | -2.21790 |
| H  | -2.63103 | 4.50396  | -2.53467 |
| H  | -1.02205 | 4.81753  | 0.05957  |
| H  | -1.01875 | 5.86619  | -1.36053 |
| H  | -0.44169 | 0.78324  | -3.01695 |
| H  | 1.96527  | 1.18491  | -3.49522 |
| H  | 3.03263  | 3.31729  | -2.82264 |
| H  | 1.71193  | 5.09437  | -1.70143 |
| H  | -0.87723 | -2.56745 | 5.25789  |
| H  | 0.32013  | -0.39724 | 5.12967  |
| Cl | 0.01326  | 1.81243  | 3.39199  |
| H  | -4.04090 | -0.71116 | 1.07909  |
| H  | -5.17641 | -2.88137 | 1.20729  |
| H  | -4.46875 | -4.58558 | 2.88038  |
| H  | -2.60602 | -4.09438 | 4.43505  |
| Au | -0.61635 | -0.61343 | -0.50362 |
| C  | 0.42779  | -2.18278 | -1.31138 |
| C  | -0.28480 | -2.96237 | -2.23733 |
| C  | 1.74195  | -2.47911 | -0.99023 |

---

|   |          |          |          |
|---|----------|----------|----------|
| C | 0.35598  | -4.03467 | -2.85635 |
| C | 2.37051  | -3.56190 | -1.61226 |
| H | 2.27101  | -1.87681 | -0.25042 |
| C | 1.68013  | -4.32929 | -2.54457 |
| H | -0.17481 | -4.65205 | -3.58071 |
| H | 3.40171  | -3.81280 | -1.36161 |
| H | 2.17325  | -5.16972 | -3.02960 |
| C | -2.07958 | -1.43038 | -1.67836 |
| C | -3.37063 | -0.93535 | -1.77091 |
| C | -1.67074 | -2.54349 | -2.43721 |
| C | -4.28568 | -1.55260 | -2.62815 |
| H | -3.68912 | -0.07549 | -1.18105 |
| C | -2.59832 | -3.14554 | -3.28663 |
| C | -3.89642 | -2.65369 | -3.38100 |
| H | -5.30052 | -1.16599 | -2.70302 |
| H | -2.30772 | -4.01107 | -3.88155 |
| H | -4.60812 | -3.13432 | -4.04927 |
| O | 1.18479  | 0.06342  | 0.59218  |
| C | 2.93735  | 1.63472  | 0.76600  |
| C | 1.61935  | 1.24451  | 0.47756  |
| C | 5.24090  | 0.94777  | 1.42264  |
| C | 3.88952  | 0.70963  | 1.15559  |
| C | 6.09872  | -0.04765 | 1.92923  |
| H | 0.93080  | 2.03208  | 0.11767  |
| H | 3.53709  | -0.31945 | 1.28372  |
| H | 3.19595  | 2.68558  | 0.63688  |
| C | 7.32060  | 0.37159  | 2.70288  |
| H | 5.59956  | -0.93533 | 2.32545  |
| H | 5.63244  | 1.95897  | 1.28123  |
| H | 8.00392  | -0.46198 | 2.89833  |
| H | 7.87819  | 1.16180  | 2.18281  |
| H | 7.01337  | 0.77793  | 3.67597  |
| C | 6.96882  | -0.95501 | 0.33967  |
| C | 5.94639  | -1.74620 | -0.19613 |
| C | 5.19200  | -0.98596 | -1.11726 |
| C | 5.79280  | 0.23904  | -1.26789 |

---

|   |          |          |          |
|---|----------|----------|----------|
| C | 7.11425  | 0.22387  | -0.59027 |
| H | 7.82916  | -1.39506 | 0.84231  |
| H | 5.70302  | -2.75545 | 0.12930  |
| H | 4.26347  | -1.30086 | -1.58835 |
| H | 5.42600  | 1.05756  | -1.88155 |
| H | 7.88072  | -0.04210 | -1.34109 |
| H | 7.43269  | 1.17074  | -0.14252 |
| O | -3.59489 | 4.47782  | -0.78943 |
| C | -3.56076 | 4.15614  | 0.57631  |
| H | -2.98992 | 4.90144  | 1.15667  |
| H | -4.59286 | 4.18455  | 0.94228  |

Top, away, 2, exo, away

M06/lanl2dz-6-31G(d) Energy = -2646.116389

M06/lanl2dz-6-31G(d) Free Energy = -2645.475916

M06/def2-TZVP Derived free energy = -2646.584848

M06/def2-TZVP Derived free energy in solution (toluene) = -2646.616700

M06/def2-TZVP Derived free energy in solution (nitromethane) = -2646.642511

Number of Imaginary Frequencies = 1 (-364.19)

M06/lanl2dz-6-31G(d) Geometry

|   |          |          |          |
|---|----------|----------|----------|
| C | 0.86181  | 2.76491  | 0.08901  |
| C | 2.16322  | 3.58818  | -0.03368 |
| C | 1.97652  | 1.31311  | -1.62493 |
| N | 0.95731  | 1.55473  | -0.73877 |
| C | 0.11954  | 0.49129  | -0.74549 |
| N | 0.67777  | -0.33172 | -1.64672 |
| N | 1.83948  | 0.15696  | -2.20276 |
| C | 1.72669  | 5.01758  | 0.26868  |
| C | 0.29248  | 5.04333  | -0.18469 |
| C | -0.20708 | 3.74717  | -0.31495 |
| C | -1.51889 | 3.51907  | -0.70794 |
| C | -2.33231 | 4.61758  | -0.97779 |
| C | -1.83718 | 5.91378  | -0.84871 |
| C | -0.52068 | 6.13587  | -0.45024 |

---

|    |          |          |          |
|----|----------|----------|----------|
| C  | 0.16159  | -1.59171 | -2.07193 |
| C  | 0.21542  | -2.70120 | -1.18455 |
| C  | -0.36151 | -3.93295 | -1.61142 |
| C  | -0.94185 | -4.01652 | -2.89919 |
| C  | -0.96141 | -2.93837 | -3.74368 |
| C  | -0.40753 | -1.71374 | -3.32127 |
| C  | 0.81047  | -2.63647 | 0.09958  |
| C  | 0.81285  | -3.73667 | 0.92280  |
| C  | 0.23146  | -4.95309 | 0.50694  |
| C  | -0.33884 | -5.04578 | -0.73703 |
| H  | 0.73269  | 2.41435  | 1.12459  |
| H  | 2.95535  | 3.20955  | 0.63856  |
| H  | 2.37602  | 5.73062  | -0.25406 |
| H  | 1.81255  | 5.22147  | 1.34644  |
| H  | -1.91581 | 2.50856  | -0.81539 |
| H  | -3.36157 | 4.45986  | -1.29344 |
| H  | -2.48366 | 6.76145  | -1.06736 |
| H  | -0.13422 | 7.15005  | -0.35762 |
| H  | -1.37809 | -4.96266 | -3.21706 |
| H  | -1.40576 | -3.00148 | -4.73369 |
| Cl | -0.50416 | -0.35439 | -4.39562 |
| H  | 1.27718  | -1.71132 | 0.43754  |
| H  | 1.27235  | -3.66412 | 1.90880  |
| H  | 0.23925  | -5.81381 | 1.17190  |
| H  | -0.78541 | -5.98011 | -1.07541 |
| Au | -1.39506 | 0.08157  | 0.76916  |
| C  | -2.76829 | -0.30408 | 2.24093  |
| C  | -4.03608 | -0.70641 | 1.78682  |
| C  | -2.50524 | -0.17254 | 3.59363  |
| C  | -5.02336 | -1.01662 | 2.71858  |
| C  | -3.50721 | -0.48012 | 4.51973  |
| H  | -1.53875 | 0.18956  | 3.94434  |
| C  | -4.75407 | -0.90914 | 4.08064  |
| H  | -6.01261 | -1.33180 | 2.38725  |
| H  | -3.30926 | -0.37645 | 5.58521  |
| H  | -5.53097 | -1.14844 | 4.80413  |

---

|   |          |          |          |
|---|----------|----------|----------|
| C | -3.04844 | -0.26880 | -0.37525 |
| C | -3.04423 | -0.14260 | -1.75138 |
| C | -4.18246 | -0.69750 | 0.33433  |
| C | -4.19789 | -0.48331 | -2.46352 |
| H | -2.16672 | 0.21719  | -2.28572 |
| C | -5.32216 | -1.03000 | -0.39624 |
| C | -5.32598 | -0.92889 | -1.78512 |
| H | -4.20301 | -0.39237 | -3.54883 |
| H | -6.21939 | -1.36528 | 0.12339  |
| H | -6.22363 | -1.19386 | -2.34050 |
| O | 0.47130  | 0.32196  | 2.02134  |
| C | 2.28422  | -0.87655 | 2.93732  |
| C | 0.92057  | -0.57405 | 2.79063  |
| C | 4.63169  | -0.51408 | 2.23686  |
| C | 3.25446  | -0.32001 | 2.11510  |
| C | 5.59993  | 0.16477  | 1.47513  |
| H | 0.20186  | -1.16535 | 3.38834  |
| H | 2.90024  | 0.34797  | 1.31777  |
| H | 2.57122  | -1.58128 | 3.71797  |
| C | 6.95394  | 0.41949  | 2.08276  |
| H | 5.22109  | 0.98437  | 0.85725  |
| H | 4.97826  | -1.16991 | 3.04086  |
| H | 7.67277  | 0.81731  | 1.35835  |
| H | 6.85831  | 1.15778  | 2.89044  |
| H | 7.37532  | -0.49350 | 2.52361  |
| C | 6.16792  | -1.09817 | -0.04430 |
| C | 5.14465  | -0.92679 | -0.97919 |
| C | 4.08870  | -1.82479 | -0.70153 |
| C | 4.47599  | -2.65151 | 0.32164  |
| C | 5.91907  | -2.43534 | 0.60613  |
| H | 7.17542  | -0.72274 | -0.21506 |
| H | 5.12529  | -0.16730 | -1.75839 |
| H | 3.12825  | -1.83235 | -1.20928 |
| H | 3.86505  | -3.42849 | 0.77519  |
| H | 6.22419  | -2.54640 | 1.65138  |
| H | 6.49185  | -3.18719 | 0.03269  |

---

|   |         |         |          |
|---|---------|---------|----------|
| O | 2.63504 | 3.56993 | -1.37063 |
| C | 3.07570 | 2.30795 | -1.77313 |
| H | 3.94380 | 1.98050 | -1.16388 |
| H | 3.40111 | 2.37320 | -2.81686 |

M06/lanl2dz-6-31G(d) Energy = -2646.113925

M06/lanl2dz-6-31G(d) Free Energy = -2645.475209

M06/def2-TZVP Derived free energy = -2646.584820

M06/def2-TZVP Derived free energy in solution (toluene) = -2646.615634

M06/def2-TZVP Derived free energy in solution (nitromethane) = -2646.640411

Number of Imaginary Frequencies = 1 (-368.28)

M06/lanl2dz-6-31G(d) Geometry

|   |          |          |          |
|---|----------|----------|----------|
| C | 1.69097  | -0.32943 | 3.12357  |
| C | 2.63135  | -0.97040 | 4.15774  |
| C | 1.77497  | -2.66726 | 2.18612  |
| N | 1.55149  | -1.31797 | 2.01961  |
| C | 1.17335  | -1.10430 | 0.73787  |
| N | 1.17018  | -2.33756 | 0.20811  |
| N | 1.53747  | -3.32370 | 1.09119  |
| C | 4.03941  | -0.70695 | 3.58332  |
| C | 3.84032  | 0.63361  | 2.92818  |
| C | 2.47875  | 0.87523  | 2.71245  |
| C | 2.02521  | 2.09715  | 2.23303  |
| C | 2.96664  | 3.06678  | 1.89176  |
| C | 4.32725  | 2.81418  | 2.05967  |
| C | 4.77392  | 1.60597  | 2.59560  |
| C | 0.84572  | -2.68079 | -1.13681 |
| C | -0.49394 | -2.51661 | -1.58668 |
| C | -0.79129 | -2.82043 | -2.94727 |
| C | 0.23778  | -3.30585 | -3.78878 |
| C | 1.50972  | -3.49429 | -3.31979 |
| C | 1.81617  | -3.17759 | -1.98057 |
| C | -1.54329 | -2.07976 | -0.74229 |
| C | -2.81532 | -1.92404 | -1.23592 |
| C | -3.10514 | -2.19596 | -2.58898 |



---

|    |          |          |          |
|----|----------|----------|----------|
| C  | -2.11172 | -2.64192 | -3.42310 |
| H  | 0.68512  | -0.12419 | 3.51030  |
| H  | 2.52438  | -0.39933 | 5.08848  |
| H  | 4.32721  | -1.47475 | 2.84644  |
| H  | 4.81199  | -0.70855 | 4.36117  |
| H  | 0.95675  | 2.30196  | 2.14432  |
| H  | 2.63355  | 4.02592  | 1.49916  |
| H  | 5.05156  | 3.58108  | 1.79207  |
| H  | 5.83689  | 1.43788  | 2.76364  |
| H  | 0.00094  | -3.53927 | -4.82614 |
| H  | 2.29951  | -3.87657 | -3.96124 |
| Cl | 3.44519  | -3.42982 | -1.44029 |
| H  | -1.34383 | -1.87137 | 0.30697  |
| H  | -3.60405 | -1.58260 | -0.56395 |
| H  | -4.11541 | -2.06003 | -2.97234 |
| H  | -2.32211 | -2.87019 | -4.46744 |
| Au | 0.73356  | 0.78433  | -0.22013 |
| C  | 0.39681  | 2.58616  | -1.15429 |
| C  | 1.39066  | 2.97127  | -2.07307 |
| C  | -0.68694 | 3.41277  | -0.90511 |
| C  | 1.25272  | 4.17290  | -2.76421 |
| C  | -0.81296 | 4.61937  | -1.60067 |
| H  | -1.44011 | 3.14562  | -0.16364 |
| C  | 0.14934  | 4.98955  | -2.53235 |
| H  | 2.01178  | 4.48597  | -3.48089 |
| H  | -1.66392 | 5.27009  | -1.40566 |
| H  | 0.04956  | 5.92829  | -3.07408 |
| C  | 2.45689  | 0.94154  | -1.29929 |
| C  | 3.50796  | 0.05268  | -1.17111 |
| C  | 2.52907  | 2.05875  | -2.14825 |
| C  | 4.65501  | 0.24215  | -1.94665 |
| H  | 3.46053  | -0.78628 | -0.47791 |
| C  | 3.68139  | 2.22758  | -2.91494 |
| C  | 4.73182  | 1.31881  | -2.82112 |
| H  | 5.48029  | -0.46321 | -1.86270 |
| H  | 3.76734  | 3.08316  | -3.58425 |

---

|   |          |          |          |
|---|----------|----------|----------|
| H | 5.62336  | 1.46296  | -3.42837 |
| O | -1.11811 | 0.77740  | 1.04365  |
| C | -3.44906 | 0.83113  | 1.34406  |
| C | -2.28137 | 0.84691  | 0.56659  |
| C | -5.90733 | 1.09822  | 1.44521  |
| C | -4.69307 | 0.98417  | 0.75779  |
| C | -7.11894 | 1.49276  | 0.84779  |
| H | -2.41208 | 0.93356  | -0.53110 |
| H | -4.72833 | 1.07726  | -0.33541 |
| H | -3.34771 | 0.75653  | 2.42760  |
| C | -8.12176 | 2.24246  | 1.68666  |
| H | -7.03764 | 1.85280  | -0.18090 |
| H | -5.88137 | 0.98814  | 2.53305  |
| H | -9.08609 | 2.36523  | 1.18183  |
| H | -8.29548 | 1.74377  | 2.64948  |
| H | -7.73570 | 3.24724  | 1.90482  |
| C | -8.19047 | -0.19378 | 0.47740  |
| C | -7.62052 | -0.64287 | -0.71766 |
| C | -6.50949 | -1.46559 | -0.42847 |
| C | -6.43426 | -1.64586 | 0.93005  |
| C | -7.66714 | -1.10339 | 1.55970  |
| H | -9.19818 | 0.21678  | 0.51526  |
| H | -7.92340 | -0.32355 | -1.71184 |
| H | -5.81370 | -1.86457 | -1.16208 |
| H | -5.67121 | -2.21221 | 1.45778  |
| H | -8.38816 | -1.93521 | 1.66194  |
| H | -7.54748 | -0.67062 | 2.55763  |
| O | 2.28138  | -2.28720 | 4.49684  |
| C | 2.34297  | -3.21792 | 3.45037  |
| H | 3.38019  | -3.54218 | 3.25482  |
| H | 1.78240  | -4.10451 | 3.76700  |

Bottom, away, 2, exo, away

M06/lanl2dz-6-31G(d) Energy = -2646.118713

M06/lanl2dz-6-31G(d) Free Energy = -2645.480058

---

M06/def2-TZVP Derived free energy = -2646.589952

M06/def2-TZVP Derived free energy in solution (toluene) = -2646.620680

M06/def2-TZVP Derived free energy in solution (nitromethane) = -2646.645422

Number of Imaginary Frequencies = 1 (-400.85)

M06/lanl2dz-6-31G(d) Geometry

|   |          |          |          |
|---|----------|----------|----------|
| C | 3.01175  | 0.53456  | -2.60254 |
| C | 4.55953  | 0.68802  | -2.65035 |
| C | 2.98723  | 2.70333  | -1.46538 |
| N | 2.50426  | 1.41557  | -1.52980 |
| C | 1.55711  | 1.26069  | -0.57814 |
| N | 1.50255  | 2.47781  | -0.01100 |
| N | 2.38649  | 3.39006  | -0.54242 |
| C | 5.09270  | -0.46107 | -1.78707 |
| C | 4.00527  | -1.49204 | -1.87658 |
| C | 2.82373  | -0.92779 | -2.35942 |
| C | 1.67638  | -1.69058 | -2.55493 |
| C | 1.71915  | -3.04467 | -2.23164 |
| C | 2.88997  | -3.60872 | -1.72332 |
| C | 4.03842  | -2.84065 | -1.54307 |
| C | 0.57968  | 2.90439  | 0.98832  |
| C | -0.69872 | 3.36381  | 0.57057  |
| C | -1.62158 | 3.78618  | 1.57156  |
| C | -1.22770 | 3.75557  | 2.93141  |
| C | 0.02124  | 3.33611  | 3.30393  |
| C | 0.93701  | 2.91235  | 2.31818  |
| C | -1.08630 | 3.42061  | -0.79042 |
| C | -2.33826 | 3.86392  | -1.13772 |
| C | -3.25865 | 4.27257  | -0.14877 |
| C | -2.90474 | 4.23523  | 1.17696  |
| H | 2.53574  | 0.88599  | -3.52930 |
| H | 4.85698  | 0.54578  | -3.70358 |
| H | 5.21840  | -0.10107 | -0.75326 |
| H | 6.07230  | -0.81908 | -2.12525 |
| H | 0.76278  | -1.23987 | -2.94757 |
| H | 0.83318  | -3.66231 | -2.36572 |

---

|    |          |          |          |
|----|----------|----------|----------|
| H  | 2.90552  | -4.66584 | -1.46418 |
| H  | 4.94825  | -3.29112 | -1.14813 |
| H  | -1.93675 | 4.08749  | 3.68917  |
| H  | 0.32936  | 3.32532  | 4.34629  |
| Cl | 2.51805  | 2.41956  | 2.81923  |
| H  | -0.38321 | 3.11089  | -1.56233 |
| H  | -2.62431 | 3.90172  | -2.18693 |
| H  | -4.24593 | 4.62293  | -0.44341 |
| H  | -3.60115 | 4.56277  | 1.94869  |
| Au | 0.58055  | -0.54933 | 0.09931  |
| C  | -0.22224 | -2.32782 | 0.74867  |
| C  | 0.62298  | -3.09775 | 1.56558  |
| C  | -1.46528 | -2.80959 | 0.36839  |
| C  | 0.18388  | -4.33798 | 2.02560  |
| C  | -1.89395 | -4.05722 | 0.83318  |
| H  | -2.10345 | -2.23552 | -0.30416 |
| C  | -1.07420 | -4.81184 | 1.66461  |
| H  | 0.82396  | -4.94679 | 2.66402  |
| H  | -2.86987 | -4.44164 | 0.53553  |
| H  | -1.41122 | -5.78086 | 2.02797  |
| C  | 2.14314  | -1.24032 | 1.22670  |
| C  | 3.34492  | -0.56918 | 1.37179  |
| C  | 1.93117  | -2.49842 | 1.81730  |
| C  | 4.37680  | -1.16291 | 2.10378  |
| H  | 3.50250  | 0.41779  | 0.93777  |
| C  | 2.97414  | -3.07462 | 2.54206  |
| C  | 4.19020  | -2.41295 | 2.68112  |
| H  | 5.32386  | -0.63797 | 2.22085  |
| H  | 2.83774  | -4.05365 | 3.00091  |
| H  | 4.99475  | -2.87654 | 3.24869  |
| O  | -1.24620 | -0.05926 | -1.09485 |
| C  | -3.55481 | 0.38251  | -1.04828 |
| C  | -2.25223 | 0.43432  | -0.52304 |
| C  | -5.96579 | 0.85695  | -0.68118 |
| C  | -4.60974 | 0.94361  | -0.34713 |
| C  | -6.43852 | 0.10664  | -1.76509 |

---

|   |          |          |          |
|---|----------|----------|----------|
| H | -2.13007 | 0.92742  | 0.46429  |
| H | -4.35464 | 1.48172  | 0.57045  |
| H | -3.68228 | -0.10198 | -2.01624 |
| C | -7.82520 | 0.33958  | -2.29014 |
| H | -5.70978 | -0.15747 | -2.53364 |
| H | -6.69101 | 1.35322  | -0.03509 |
| H | -8.19433 | -0.49144 | -2.90153 |
| H | -8.54677 | 0.52670  | -1.48516 |
| H | -7.81959 | 1.23293  | -2.93023 |
| C | -6.58077 | -1.84742 | -1.05974 |
| C | -5.28478 | -2.23600 | -0.71723 |
| C | -5.04448 | -1.94589 | 0.65265  |
| C | -6.19626 | -1.47324 | 1.21221  |
| C | -7.31278 | -1.61027 | 0.23886  |
| H | -7.08490 | -2.23937 | -1.94208 |
| H | -4.55482 | -2.65908 | -1.40485 |
| H | -4.08291 | -2.04952 | 1.15151  |
| H | -6.32172 | -1.14655 | 2.24045  |
| H | -7.87698 | -2.52865 | 0.48181  |
| H | -8.04334 | -0.79440 | 0.24834  |
| O | 5.05314  | 1.92334  | -2.17804 |
| C | 4.17062  | 3.01394  | -2.31296 |
| H | 4.68261  | 3.90966  | -1.95099 |
| H | 3.88170  | 3.18071  | -3.36601 |

M06/lanl2dz-6-31G(d) Energy = -2646.115564

M06/lanl2dz-6-31G(d) Free Energy = -2645.479622

M06/def2-TZVP Derived free energy = -2646.592030

M06/def2-TZVP Derived free energy in solution (toluene) = -2646.623211

M06/def2-TZVP Derived free energy in solution (nitromethane) = -2646.648638

Number of Imaginary Frequencies = 1 (-394.80)

M06/lanl2dz-6-31G(d) Geometry

|   |          |         |          |
|---|----------|---------|----------|
| C | -0.40726 | 3.12921 | -0.16129 |
| C | -0.19636 | 4.46873 | -0.90166 |
| C | -1.78073 | 2.58421 | -2.18863 |

---

|    |          |          |          |
|----|----------|----------|----------|
| N  | -1.17360 | 2.21167  | -1.01191 |
| C  | -1.37562 | 0.88834  | -0.82432 |
| N  | -2.09538 | 0.53371  | -1.90217 |
| N  | -2.35449 | 1.57121  | -2.76419 |
| C  | -0.00080 | 5.48109  | 0.22228  |
| C  | -0.81284 | 4.90259  | 1.34865  |
| C  | -1.07844 | 3.55168  | 1.12094  |
| C  | -1.81086 | 2.80083  | 2.02973  |
| C  | -2.28063 | 3.42568  | 3.18351  |
| C  | -2.01352 | 4.77329  | 3.41666  |
| C  | -1.27748 | 5.52164  | 2.50026  |
| C  | -2.57092 | -0.77995 | -2.18094 |
| C  | -1.62406 | -1.81321 | -2.42060 |
| C  | -2.10402 | -3.14844 | -2.54807 |
| C  | -3.49663 | -3.39310 | -2.48638 |
| C  | -4.39152 | -2.37113 | -2.31572 |
| C  | -3.92136 | -1.05249 | -2.15416 |
| C  | -0.23264 | -1.57343 | -2.54336 |
| C  | 0.63729  | -2.61567 | -2.75269 |
| C  | 0.16750  | -3.94291 | -2.84187 |
| C  | -1.17670 | -4.19868 | -2.74797 |
| H  | 0.55964  | 2.63707  | 0.02953  |
| H  | 0.64489  | 4.42073  | -1.61579 |
| H  | -0.32905 | 6.47590  | -0.10302 |
| H  | 1.06431  | 5.55495  | 0.48887  |
| H  | -2.03014 | 1.74696  | 1.85114  |
| H  | -2.86331 | 2.85610  | 3.90460  |
| H  | -2.39063 | 5.24770  | 4.32065  |
| H  | -1.08109 | 6.57790  | 2.68039  |
| H  | -3.85381 | -4.41709 | -2.58784 |
| H  | -5.46246 | -2.55394 | -2.27971 |
| Cl | -5.08801 | 0.19680  | -1.85677 |
| H  | 0.14282  | -0.55208 | -2.50398 |
| H  | 1.70086  | -2.41027 | -2.87418 |
| H  | 0.87105  | -4.75687 | -3.00232 |
| H  | -1.55668 | -5.21602 | -2.83481 |

---

|    |          |          |          |
|----|----------|----------|----------|
| Au | -0.46868 | -0.39504 | 0.67968  |
| C  | 0.38799  | -1.67492 | 2.04047  |
| C  | -0.49889 | -2.59084 | 2.63328  |
| C  | 1.73404  | -1.68698 | 2.36928  |
| C  | -0.00374 | -3.54438 | 3.51979  |
| C  | 2.21920  | -2.64137 | 3.26782  |
| H  | 2.41640  | -0.94894 | 1.94716  |
| C  | 1.35320  | -3.57187 | 3.82946  |
| H  | -0.67630 | -4.26454 | 3.98514  |
| H  | 3.27543  | -2.65103 | 3.53453  |
| H  | 1.73228  | -4.31596 | 4.52745  |
| C  | -2.14675 | -1.29738 | 1.42244  |
| C  | -3.42950 | -0.90916 | 1.08506  |
| C  | -1.90043 | -2.38339 | 2.28036  |
| C  | -4.51119 | -1.65144 | 1.56800  |
| H  | -3.61567 | -0.04031 | 0.45671  |
| C  | -2.99344 | -3.11033 | 2.74907  |
| C  | -4.28907 | -2.75209 | 2.38600  |
| H  | -5.52394 | -1.35766 | 1.29521  |
| H  | -2.83515 | -3.95881 | 3.41419  |
| H  | -5.13173 | -3.33152 | 2.75813  |
| O  | 1.48140  | 0.45688  | -0.06823 |
| C  | 3.63253  | 0.09761  | -0.97025 |
| C  | 2.36729  | -0.31452 | -0.52260 |
| C  | 5.84231  | -0.61879 | -1.87759 |
| C  | 4.53240  | -0.84633 | -1.44226 |
| C  | 6.45587  | 0.63956  | -1.86189 |
| H  | 2.15035  | -1.39982 | -0.58153 |
| H  | 4.18278  | -1.88311 | -1.46123 |
| H  | 3.85987  | 1.16315  | -0.94784 |
| C  | 7.67611  | 0.88367  | -2.70060 |
| H  | 5.80022  | 1.50633  | -1.76121 |
| H  | 6.42119  | -1.47383 | -2.22866 |
| H  | 8.23858  | 1.77134  | -2.39066 |
| H  | 8.35567  | 0.02225  | -2.69981 |
| H  | 7.36525  | 1.04630  | -3.74215 |

---

|   |          |          |          |
|---|----------|----------|----------|
| C | 7.24690  | 0.84509  | 0.06488  |
| C | 6.14431  | 0.85378  | 0.91703  |
| C | 5.86081  | -0.47046 | 1.34296  |
| C | 6.82091  | -1.30889 | 0.85344  |
| C | 7.90034  | -0.50540 | 0.21991  |
| H | 7.82112  | 1.74492  | -0.14968 |
| H | 5.55973  | 1.73198  | 1.18082  |
| H | 4.99457  | -0.76450 | 1.92892  |
| H | 6.86559  | -2.38500 | 0.99371  |
| H | 8.72498  | -0.39857 | 0.94750  |
| H | 8.34365  | -0.94303 | -0.68090 |
| C | -1.67717 | 3.99309  | -2.66310 |
| H | -0.90240 | 4.06212  | -3.44941 |
| H | -2.62636 | 4.32249  | -3.09797 |
| O | -1.37949 | 4.83631  | -1.58500 |

M06/lanl2dz-6-31G(d) Energy = -2646.115563

M06/lanl2dz-6-31G(d) Free Energy = -2645.479650

M06/def2-TZVP Derived free energy = -2646.592059

M06/def2-TZVP Derived free energy in solution (toluene) = -2646.623239

M06/def2-TZVP Derived free energy in solution (nitromethane) = -2646.648666

Number of Imaginary Frequencies = 1 (-394.79)

M06/lanl2dz-6-31G(d) Geometry

|   |          |         |          |
|---|----------|---------|----------|
| C | -0.40743 | 3.12913 | -0.16190 |
| C | -0.19655 | 4.46850 | -0.90254 |
| C | -1.78074 | 2.58360 | -2.18920 |
| N | -1.17363 | 2.21135 | -1.01238 |
| C | -1.37560 | 0.88805 | -0.82452 |
| N | -2.09528 | 0.53314 | -1.90231 |
| N | -2.35441 | 1.57045 | -2.76457 |
| C | -0.00114 | 5.48112 | 0.22118  |
| C | -0.81323 | 4.90282 | 1.34762  |
| C | -1.07873 | 3.55185 | 1.12019  |
| C | -1.81115 | 2.80115 | 2.02911  |
| C | -2.28105 | 3.42624 | 3.18271  |



---

|    |          |          |          |
|----|----------|----------|----------|
| C  | -2.01404 | 4.77391  | 3.41558  |
| C  | -1.27799 | 5.52210  | 2.49906  |
| C  | -2.57072 | -0.78060 | -2.18085 |
| C  | -1.62378 | -1.81382 | -2.42042 |
| C  | -2.10365 | -3.14908 | -2.54787 |
| C  | -3.49624 | -3.39385 | -2.48608 |
| C  | -4.39120 | -2.37194 | -2.31541 |
| C  | -3.92114 | -1.05325 | -2.15401 |
| C  | -0.23238 | -1.57394 | -2.54313 |
| C  | 0.63762  | -2.61612 | -2.75247 |
| C  | 0.16792  | -3.94339 | -2.84171 |
| C  | -1.17626 | -4.19925 | -2.74779 |
| H  | 0.55949  | 2.63711  | 0.02912  |
| H  | 0.64476  | 4.42040  | -1.61660 |
| H  | -0.32945 | 6.47584  | -0.10436 |
| H  | 1.06394  | 5.55513  | 0.48784  |
| H  | -2.03035 | 1.74723  | 1.85076  |
| H  | -2.86373 | 2.85678  | 3.90390  |
| H  | -2.39124 | 5.24851  | 4.31944  |
| H  | -1.08167 | 6.57841  | 2.67897  |
| H  | -3.85335 | -4.41787 | -2.58748 |
| H  | -5.46212 | -2.55482 | -2.27931 |
| Cl | -5.08787 | 0.19601  | -1.85681 |
| H  | 0.14302  | -0.55258 | -2.50369 |
| H  | 1.70118  | -2.41065 | -2.87391 |
| H  | 0.87152  | -4.75730 | -3.00218 |
| H  | -1.55618 | -5.21662 | -2.83464 |
| Au | -0.46866 | -0.39494 | 0.67981  |
| C  | 0.38799  | -1.67439 | 2.04103  |
| C  | -0.49891 | -2.59007 | 2.63416  |
| C  | 1.73404  | -1.68636 | 2.36985  |
| C  | -0.00378 | -3.54332 | 3.52099  |
| C  | 2.21918  | -2.64045 | 3.26871  |
| H  | 2.41642  | -0.94847 | 1.94749  |
| C  | 1.35316  | -3.57074 | 3.83067  |
| H  | -0.67635 | -4.26331 | 3.98659  |

---

|   |          |          |          |
|---|----------|----------|----------|
| H | 3.27541  | -2.65003 | 3.53543  |
| H | 1.73223  | -4.31461 | 4.52890  |
| C | -2.14674 | -1.29700 | 1.42287  |
| C | -3.42949 | -0.90890 | 1.08534  |
| C | -1.90045 | -2.38270 | 2.28119  |
| C | -4.51120 | -1.65097 | 1.56856  |
| H | -3.61566 | -0.04030 | 0.45665  |
| C | -2.99347 | -3.10944 | 2.75018  |
| C | -4.28909 | -2.75131 | 2.38699  |
| H | -5.52393 | -1.35727 | 1.29567  |
| H | -2.83519 | -3.95767 | 3.41563  |
| H | -5.13176 | -3.33058 | 2.75936  |
| O | 1.48140  | 0.45666  | -0.06849 |
| C | 3.63251  | 0.09725  | -0.97044 |
| C | 2.36736  | -0.31485 | -0.52253 |
| C | 5.84240  | -0.61923 | -1.87743 |
| C | 4.53252  | -0.84678 | -1.44204 |
| C | 6.45579  | 0.63921  | -1.86216 |
| H | 2.15056  | -1.40021 | -0.58091 |
| H | 4.18304  | -1.88362 | -1.46058 |
| H | 3.85971  | 1.16283  | -0.94854 |
| C | 7.67602  | 0.88317  | -2.70093 |
| H | 5.80004  | 1.50594  | -1.76182 |
| H | 6.42141  | -1.47432 | -2.22816 |
| H | 8.23846  | 1.77093  | -2.39120 |
| H | 8.35561  | 0.02177  | -2.69996 |
| H | 7.36514  | 1.04556  | -3.74251 |
| C | 7.24665  | 0.84557  | 0.06458  |
| C | 6.14401  | 0.85429  | 0.91668  |
| C | 5.86077  | -0.46987 | 1.34302  |
| C | 6.82106  | -1.30826 | 0.85380  |
| C | 7.90037  | -0.50474 | 0.22010  |
| H | 7.82069  | 1.74545  | -0.15023 |
| H | 5.55925  | 1.73246  | 1.18019  |
| H | 4.99456  | -0.76392 | 1.92902  |
| H | 6.86595  | -2.38431 | 0.99442  |

---

|   |          |          |          |
|---|----------|----------|----------|
| H | 8.72491  | -0.39749 | 0.94773  |
| H | 8.34387  | -0.94256 | -0.68053 |
| O | -1.37965 | 4.83586  | -1.58606 |
| C | -1.67721 | 3.99238  | -2.66398 |
| H | -0.90239 | 4.06127  | -3.45025 |
| H | -2.62638 | 4.32163  | -3.09900 |

M06/lanl2dz-6-31G(d) Energy = -2646.114897

M06/lanl2dz-6-31G(d) Free Energy = -2645.477070

M06/def2-TZVP Derived free energy = -2646.587338

M06/def2-TZVP Derived free energy in solution (toluene) = -2646.617802

M06/def2-TZVP Derived free energy in solution (nitromethane) = -2646.641824

Number of Imaginary Frequencies = 1 (-395.94)

M06/lanl2dz-6-31G(d) Geometry

|   |          |          |          |
|---|----------|----------|----------|
| C | -0.74379 | 3.23057  | -0.16546 |
| C | -1.33492 | 4.60192  | -0.54579 |
| C | -2.18166 | 2.51928  | -2.11392 |
| N | -1.46641 | 2.21258  | -0.97728 |
| C | -1.50286 | 0.87007  | -0.80117 |
| N | -2.24149 | 0.44460  | -1.83879 |
| N | -2.66864 | 1.45062  | -2.66867 |
| C | -2.59555 | 4.72753  | 0.33236  |
| C | -2.17011 | 3.98807  | 1.56922  |
| C | -1.08106 | 3.15398  | 1.29425  |
| C | -0.43712 | 2.45518  | 2.30860  |
| C | -0.94519 | 2.53937  | 3.60310  |
| C | -2.05727 | 3.33608  | 3.87227  |
| C | -2.66621 | 4.07981  | 2.86275  |
| C | -2.58985 | -0.90660 | -2.13018 |
| C | -1.57260 | -1.80298 | -2.55580 |
| C | -1.92091 | -3.16999 | -2.75742 |
| C | -3.26104 | -3.57876 | -2.55905 |
| C | -4.23276 | -2.68393 | -2.19895 |
| C | -3.89224 | -1.33304 | -1.98825 |
| C | -0.24137 | -1.39293 | -2.81338 |

---

|    |          |          |          |
|----|----------|----------|----------|
| C  | 0.69770  | -2.30321 | -3.23352 |
| C  | 0.36253  | -3.66310 | -3.40454 |
| C  | -0.92233 | -4.08276 | -3.17261 |
| H  | 0.32302  | 3.12309  | -0.39547 |
| H  | -0.61098 | 5.36151  | -0.22482 |
| H  | -3.46754 | 4.24642  | -0.13891 |
| H  | -2.87011 | 5.77324  | 0.51477  |
| H  | 0.46672  | 1.87888  | 2.10677  |
| H  | -0.45839 | 1.99585  | 4.41050  |
| H  | -2.43917 | 3.39883  | 4.88948  |
| H  | -3.50831 | 4.73203  | 3.09044  |
| H  | -3.51711 | -4.62621 | -2.71353 |
| H  | -5.26606 | -2.99260 | -2.06239 |
| Cl | -5.15243 | -0.23878 | -1.51017 |
| H  | 0.02539  | -0.34153 | -2.71196 |
| H  | 1.70832  | -1.96543 | -3.46117 |
| H  | 1.11891  | -4.37074 | -3.73677 |
| H  | -1.20050 | -5.12615 | -3.31688 |
| Au | -0.36373 | -0.28085 | 0.64553  |
| C  | 0.75627  | -1.34767 | 1.99822  |
| C  | 0.06457  | -2.36350 | 2.67965  |
| C  | 2.09093  | -1.09419 | 2.27559  |
| C  | 0.74968  | -3.15762 | 3.59726  |
| C  | 2.76467  | -1.88653 | 3.21087  |
| H  | 2.61268  | -0.26917 | 1.78701  |
| C  | 2.09751  | -2.92263 | 3.85469  |
| H  | 0.23099  | -3.95225 | 4.13325  |
| H  | 3.80982  | -1.68243 | 3.44430  |
| H  | 2.62379  | -3.54106 | 4.57926  |
| C  | -1.82630 | -1.41300 | 1.50929  |
| C  | -3.16936 | -1.23897 | 1.24163  |
| C  | -1.36636 | -2.40702 | 2.39088  |
| C  | -4.09365 | -2.11876 | 1.81220  |
| H  | -3.51672 | -0.43129 | 0.60211  |
| C  | -2.30425 | -3.27413 | 2.94867  |
| C  | -3.65751 | -3.13772 | 2.64991  |

---

|   |          |          |          |
|---|----------|----------|----------|
| H | -5.15352 | -1.99411 | 1.59417  |
| H | -1.97898 | -4.05827 | 3.63196  |
| H | -4.37710 | -3.82579 | 3.08940  |
| O | 1.42721  | 0.80891  | -0.19732 |
| C | 3.56585  | 0.67790  | -1.16828 |
| C | 2.30123  | 0.16640  | -0.83806 |
| C | 5.78815  | 0.26121  | -2.19358 |
| C | 4.46408  | -0.08154 | -1.90371 |
| C | 6.40652  | 1.40860  | -1.68073 |
| H | 2.07734  | -0.87293 | -1.15490 |
| H | 4.11092  | -1.05295 | -2.26151 |
| H | 3.79087  | 1.69381  | -0.84535 |
| C | 7.68577  | 1.90536  | -2.28704 |
| H | 5.75158  | 2.19965  | -1.31170 |
| H | 6.38185  | -0.42472 | -2.79877 |
| H | 7.44936  | 2.48433  | -3.19082 |
| H | 8.24658  | 2.56801  | -1.61833 |
| H | 8.34408  | 1.08341  | -2.59534 |
| C | 7.02365  | 0.87901  | 0.24348  |
| C | 5.87043  | 0.53875  | 0.95080  |
| C | 5.62454  | -0.85501 | 0.81907  |
| C | 6.65737  | -1.42270 | 0.13092  |
| C | 7.73351  | -0.41632 | -0.06834 |
| H | 7.56731  | 1.80292  | 0.43612  |
| H | 5.23071  | 1.23684  | 1.48648  |
| H | 4.73153  | -1.37139 | 1.16455  |
| H | 6.74355  | -2.46947 | -0.14604 |
| H | 8.50816  | -0.57377 | 0.70343  |
| H | 8.24868  | -0.47260 | -1.03323 |
| O | -1.47888 | 4.79350  | -1.92958 |
| C | -2.38829 | 3.92828  | -2.55436 |
| H | -2.23047 | 4.01178  | -3.63512 |
| H | -3.43431 | 4.21988  | -2.35573 |

M06/lanl2dz-6-31G(d) Energy = -2646.114083

M06/lanl2dz-6-31G(d) Free Energy = -2645.476015

---

M06/def2-TZVP Derived free energy = -2646.586008

M06/def2-TZVP Derived free energy in solution (toluene) = -2646.616610

M06/def2-TZVP Derived free energy in solution (nitromethane) = -2646.641125

Number of Imaginary Frequencies = 1 (-376.34)

M06/lanl2dz-6-31G(d) Geometry

|   |          |          |          |
|---|----------|----------|----------|
| C | -1.73878 | -0.38206 | 3.10201  |
| C | -2.75033 | -0.15829 | 4.23950  |
| C | -2.45010 | 1.97302  | 2.54915  |
| N | -1.89622 | 0.76921  | 2.17394  |
| C | -1.52703 | 0.85789  | 0.87476  |
| N | -1.86913 | 2.11060  | 0.54159  |
| N | -2.44098 | 2.82287  | 1.56718  |
| C | -4.08432 | -0.66404 | 3.65070  |
| C | -3.61184 | -1.78443 | 2.76423  |
| C | -2.24352 | -1.65768 | 2.50077  |
| C | -1.54415 | -2.63939 | 1.81074  |
| C | -2.25362 | -3.72303 | 1.29681  |
| C | -3.62772 | -3.82610 | 1.50878  |
| C | -4.31243 | -2.87330 | 2.26342  |
| C | -1.69326 | 2.72859  | -0.73061 |
| C | -0.37922 | 3.06367  | -1.15843 |
| C | -0.22371 | 3.66506  | -2.44129 |
| C | -1.37006 | 3.92289  | -3.22994 |
| C | -2.62720 | 3.62056  | -2.77988 |
| C | -2.78837 | 3.02220  | -1.51423 |
| C | 0.77087  | 2.85154  | -0.35889 |
| C | 2.01389  | 3.21156  | -0.81952 |
| C | 2.17183  | 3.79102  | -2.09615 |
| C | 1.07367  | 4.01134  | -2.88765 |
| H | -0.69215 | -0.39731 | 3.42889  |
| H | -2.45932 | -0.81888 | 5.06580  |
| H | -4.59233 | 0.12183  | 3.06858  |
| H | -4.78633 | -0.98459 | 4.42952  |
| H | -0.46141 | -2.57454 | 1.68886  |
| H | -1.72928 | -4.49465 | 0.73577  |

---

|    |          |          |          |
|----|----------|----------|----------|
| H  | -4.16943 | -4.67922 | 1.10477  |
| H  | -5.37651 | -2.99124 | 2.46414  |
| H  | -1.23936 | 4.38299  | -4.20875 |
| H  | -3.51025 | 3.83252  | -3.37710 |
| Cl | -4.40267 | 2.68006  | -0.97423 |
| H  | 0.66577  | 2.41327  | 0.63279  |
| H  | 2.88326  | 3.05740  | -0.18105 |
| H  | 3.16280  | 4.07367  | -2.44530 |
| H  | 1.17969  | 4.46743  | -3.87150 |
| Au | -0.51589 | -0.64789 | -0.29886 |
| C  | 0.42395  | -2.09274 | -1.42385 |
| C  | -0.32043 | -2.56778 | -2.51912 |
| C  | 1.67984  | -2.61391 | -1.15219 |
| C  | 0.23487  | -3.53150 | -3.35821 |
| C  | 2.22340  | -3.58885 | -1.99440 |
| H  | 2.24841  | -2.28366 | -0.28158 |
| C  | 1.50675  | -4.03435 | -3.09854 |
| H  | -0.32743 | -3.90468 | -4.21391 |
| H  | 3.20667  | -4.00594 | -1.78022 |
| H  | 1.93234  | -4.78991 | -3.75632 |
| C  | -2.01575 | -1.10502 | -1.60194 |
| C  | -3.29135 | -0.58596 | -1.49076 |
| C  | -1.66982 | -2.01650 | -2.61423 |
| C  | -4.24980 | -0.93502 | -2.44632 |
| H  | -3.56113 | 0.09258  | -0.68388 |
| C  | -2.64083 | -2.35052 | -3.55716 |
| C  | -3.91904 | -1.80391 | -3.47875 |
| H  | -5.25195 | -0.51507 | -2.37456 |
| H  | -2.40309 | -3.05204 | -4.35654 |
| H  | -4.66498 | -2.07021 | -4.22509 |
| O  | 1.17948  | -0.29163 | 1.12870  |
| C  | 3.43378  | 0.29688  | 1.49318  |
| C  | 2.30633  | 0.06621  | 0.69289  |
| C  | 5.84899  | 0.89626  | 1.55066  |
| C  | 4.63311  | 0.65307  | 0.90217  |
| C  | 6.98278  | 1.41257  | 0.89591  |

---

|   |          |          |          |
|---|----------|----------|----------|
| H | 2.43825  | 0.20723  | -0.39888 |
| H | 4.62819  | 0.78095  | -0.18814 |
| H | 3.34997  | 0.17082  | 2.57309  |
| C | 8.00308  | 2.16799  | 1.70603  |
| H | 6.80367  | 1.82492  | -0.10017 |
| H | 5.89439  | 0.74037  | 2.63182  |
| H | 8.91032  | 2.39489  | 1.13568  |
| H | 7.57518  | 3.12442  | 2.03548  |
| H | 8.29151  | 1.61347  | 2.60884  |
| C | 8.11449  | -0.17341 | 0.30618  |
| C | 7.41676  | -0.65781 | -0.80456 |
| C | 6.42778  | -1.57202 | -0.37945 |
| C | 6.56703  | -1.77289 | 0.97123  |
| C | 7.82627  | -1.13296 | 1.43304  |
| H | 9.07942  | 0.32204  | 0.20856  |
| H | 7.54455  | -0.30271 | -1.82434 |
| H | 5.65409  | -2.00186 | -1.01010 |
| H | 5.93247  | -2.39852 | 1.59316  |
| H | 7.80662  | -0.71595 | 2.44507  |
| H | 8.62220  | -1.89983 | 1.42420  |
| C | -3.06181 | 2.16962  | 3.89500  |
| H | -2.71272 | 3.10956  | 4.33692  |
| H | -4.15636 | 2.25309  | 3.77802  |
| O | -2.71204 | 1.13793  | 4.77800  |

M06/lanl2dz-6-31G(d) Energy = -2646.115564

M06/lanl2dz-6-31G(d) Free Energy = -2645.479642

M06/def2-TZVP Derived free energy = -2646.592051

M06/def2-TZVP Derived free energy in solution (toluene) = -2646.623231

M06/def2-TZVP Derived free energy in solution (nitromethane) = -2646.648658

Number of Imaginary Frequencies = 1 (-394.80)

M06/lanl2dz-6-31G(d) Geometry

|   |          |         |          |
|---|----------|---------|----------|
| C | -0.40780 | 3.12922 | -0.16152 |
| C | -0.19715 | 4.46874 | -0.90195 |
| C | -1.78114 | 2.58385 | -2.18884 |



---

|    |          |          |          |
|----|----------|----------|----------|
| N  | -1.17392 | 2.21148  | -1.01212 |
| C  | -1.37566 | 0.88811  | -0.82449 |
| N  | -2.09534 | 0.53329  | -1.90232 |
| N  | -2.35468 | 1.57071  | -2.76437 |
| C  | -0.00179 | 5.48119  | 0.22194  |
| C  | -0.81375 | 4.90260  | 1.34833  |
| C  | -1.07909 | 3.55163  | 1.12068  |
| C  | -1.81138 | 2.80068  | 2.02949  |
| C  | -2.28130 | 3.42551  | 3.18323  |
| C  | -2.01445 | 4.77318  | 3.41631  |
| C  | -1.27854 | 5.52162  | 2.49989  |
| C  | -2.57067 | -0.78046 | -2.18101 |
| C  | -1.62365 | -1.81358 | -2.42069 |
| C  | -2.10341 | -3.14888 | -2.54817 |
| C  | -3.49597 | -3.39378 | -2.48636 |
| C  | -4.39101 | -2.37195 | -2.31562 |
| C  | -3.92107 | -1.05323 | -2.15415 |
| C  | -0.23227 | -1.57358 | -2.54348 |
| C  | 0.63780  | -2.61568 | -2.75292 |
| C  | 0.16822  | -3.94299 | -2.84216 |
| C  | -1.17593 | -4.19896 | -2.74818 |
| H  | 0.55919  | 2.63729  | 0.02937  |
| H  | 0.64413  | 4.42087  | -1.61606 |
| H  | -0.33022 | 6.47593  | -0.10341 |
| H  | 1.06329  | 5.55527  | 0.48855  |
| H  | -2.03045 | 1.74676  | 1.85097  |
| H  | -2.86388 | 2.85585  | 3.90435  |
| H  | -2.39167 | 5.24757  | 4.32027  |
| H  | -1.08235 | 6.57792  | 2.67997  |
| H  | -3.85298 | -4.41783 | -2.58779 |
| H  | -5.46192 | -2.55494 | -2.27952 |
| Cl | -5.08791 | 0.19589  | -1.85681 |
| H  | 0.14305  | -0.55219 | -2.50404 |
| H  | 1.70134  | -2.41011 | -2.87443 |
| H  | 0.87188  | -4.75683 | -3.00270 |
| H  | -1.55577 | -5.21636 | -2.83504 |

---

|    |          |          |          |
|----|----------|----------|----------|
| Au | -0.46859 | -0.39506 | 0.67961  |
| C  | 0.38814  | -1.67478 | 2.04053  |
| C  | -0.49876 | -2.59051 | 2.63361  |
| C  | 1.73422  | -1.68691 | 2.36920  |
| C  | -0.00360 | -3.54394 | 3.52024  |
| C  | 2.21939  | -2.64118 | 3.26786  |
| H  | 2.41661  | -0.94901 | 1.94687  |
| C  | 1.35338  | -3.57149 | 3.82977  |
| H  | -0.67616 | -4.26397 | 3.98578  |
| H  | 3.27566  | -2.65088 | 3.53444  |
| H  | 1.73247  | -4.31550 | 4.52784  |
| C  | -2.14664 | -1.29725 | 1.42260  |
| C  | -3.42941 | -0.90908 | 1.08520  |
| C  | -1.90031 | -2.38305 | 2.28078  |
| C  | -4.51110 | -1.65117 | 1.56843  |
| H  | -3.61560 | -0.04041 | 0.45662  |
| C  | -2.99332 | -3.10981 | 2.74977  |
| C  | -4.28896 | -2.75160 | 2.38672  |
| H  | -5.52385 | -1.35740 | 1.29565  |
| H  | -2.83501 | -3.95812 | 3.41511  |
| H  | -5.13162 | -3.33088 | 2.75909  |
| O  | 1.48142  | 0.45686  | -0.06843 |
| C  | 3.63269  | 0.09777  | -0.97016 |
| C  | 2.36744  | -0.31448 | -0.52264 |
| C  | 5.84262  | -0.61839 | -1.87731 |
| C  | 4.53272  | -0.84608 | -1.44205 |
| C  | 6.45601  | 0.64005  | -1.86165 |
| H  | 2.15062  | -1.39981 | -0.58153 |
| H  | 4.18323  | -1.88290 | -1.46102 |
| H  | 3.85990  | 1.16334  | -0.94775 |
| C  | 7.67626  | 0.88429  | -2.70032 |
| H  | 5.80024  | 1.50673  | -1.76105 |
| H  | 6.42165  | -1.47337 | -2.22828 |
| H  | 8.23855  | 1.77209  | -2.39043 |
| H  | 8.35597  | 0.02299  | -2.69940 |
| H  | 7.36542  | 1.04676  | -3.74189 |

---

|   |          |          |          |
|---|----------|----------|----------|
| C | 7.24693  | 0.84580  | 0.06514  |
| C | 6.14429  | 0.85441  | 0.91724  |
| C | 5.86093  | -0.46983 | 1.34324  |
| C | 6.82114  | -1.30819 | 0.85381  |
| C | 7.90052  | -0.50462 | 0.22029  |
| H | 7.82106  | 1.74568  | -0.14945 |
| H | 5.55961  | 1.73256  | 1.18095  |
| H | 4.99470  | -0.76393 | 1.92919  |
| H | 6.86594  | -2.38428 | 0.99416  |
| H | 8.72511  | -0.39765 | 0.94790  |
| H | 8.34391  | -0.94225 | -0.68048 |
| O | -1.38034 | 4.83606  | -1.58532 |
| C | -1.67786 | 3.99274  | -2.66337 |
| H | -0.90312 | 4.06189  | -3.44969 |
| H | -2.62712 | 4.32192  | -3.09825 |

M06/lanl2dz-6-31G(d) Energy = -2646.114897

M06/lanl2dz-6-31G(d) Free Energy = -2645.477065

M06/def2-TZVP Derived free energy = -2646.587333

M06/def2-TZVP Derived free energy in solution (toluene) = -2646.617797

M06/def2-TZVP Derived free energy in solution (nitromethane) = -2646.641819

Number of Imaginary Frequencies = 1 (-395.92)

M06/lanl2dz-6-31G(d) Geometry

|   |          |         |          |
|---|----------|---------|----------|
| C | -0.74383 | 3.23044 | -0.16571 |
| C | -1.33483 | 4.60176 | -0.54634 |
| C | -2.18161 | 2.51894 | -2.11417 |
| N | -1.46643 | 2.21235 | -0.97744 |
| C | -1.50292 | 0.86986 | -0.80119 |
| N | -2.24151 | 0.44430 | -1.83880 |
| N | -2.66859 | 1.45023 | -2.66881 |
| C | -2.59554 | 4.72761 | 0.33165  |
| C | -2.17029 | 3.98834 | 1.56868  |
| C | -1.08126 | 3.15413 | 1.29398  |
| C | -0.43748 | 2.45549 | 2.30854  |
| C | -0.94568 | 2.53997 | 3.60297  |

---

|    |          |          |          |
|----|----------|----------|----------|
| C  | -2.05775 | 3.33678  | 3.87187  |
| C  | -2.66654 | 4.08035  | 2.86213  |
| C  | -2.58983 | -0.90693 | -2.13012 |
| C  | -1.57260 | -1.80326 | -2.55586 |
| C  | -1.92087 | -3.17028 | -2.75746 |
| C  | -3.26096 | -3.57911 | -2.55898 |
| C  | -4.23269 | -2.68432 | -2.19878 |
| C  | -3.89220 | -1.33342 | -1.98810 |
| C  | -0.24142 | -1.39315 | -2.81361 |
| C  | 0.69765  | -2.30337 | -3.23384 |
| C  | 0.36253  | -3.66329 | -3.40480 |
| C  | -0.92229 | -4.08301 | -3.17275 |
| H  | 0.32299  | 3.12283  | -0.39559 |
| H  | -0.61087 | 5.36136  | -0.22544 |
| H  | -3.46752 | 4.24648  | -0.13964 |
| H  | -2.87005 | 5.77337  | 0.51385  |
| H  | 0.46636  | 1.87912  | 2.10694  |
| H  | -0.45900 | 1.99657  | 4.41052  |
| H  | -2.43977 | 3.39975  | 4.88902  |
| H  | -3.50862 | 4.73267  | 3.08960  |
| H  | -3.51701 | -4.62657 | -2.71345 |
| H  | -5.26597 | -2.99302 | -2.06214 |
| Cl | -5.15238 | -0.23920 | -1.50992 |
| H  | 0.02529  | -0.34173 | -2.71228 |
| H  | 1.70822  | -1.96555 | -3.46162 |
| H  | 1.11891  | -4.37090 | -3.73710 |
| H  | -1.20043 | -5.12641 | -3.31699 |
| Au | -0.36372 | -0.28079 | 0.64567  |
| C  | 0.75644  | -1.34727 | 1.99850  |
| C  | 0.06490  | -2.36305 | 2.68017  |
| C  | 2.09108  | -1.09356 | 2.27576  |
| C  | 0.75015  | -3.15687 | 3.59794  |
| C  | 2.76497  | -1.88559 | 3.21119  |
| H  | 2.61271  | -0.26859 | 1.78696  |
| C  | 2.09795  | -2.92163 | 3.85527  |
| H  | 0.23159  | -3.95145 | 4.13412  |

---

|   |          |          |          |
|---|----------|----------|----------|
| H | 3.81010  | -1.68131 | 3.44451  |
| H | 2.62434  | -3.53982 | 4.57997  |
| C | -1.82609 | -1.41306 | 1.50961  |
| C | -3.16917 | -1.23929 | 1.24185  |
| C | -1.36602 | -2.40685 | 2.39140  |
| C | -4.09334 | -2.11913 | 1.81253  |
| H | -3.51661 | -0.43178 | 0.60216  |
| C | -2.30380 | -3.27401 | 2.94929  |
| C | -3.65707 | -3.13787 | 2.65044  |
| H | -5.15322 | -1.99471 | 1.59441  |
| H | -1.97844 | -4.05797 | 3.63274  |
| H | -4.37657 | -3.82599 | 3.09001  |
| O | 1.42707  | 0.80914  | -0.19729 |
| C | 3.56569  | 0.67822  | -1.16831 |
| C | 2.30102  | 0.16675  | -0.83824 |
| C | 5.78792  | 0.26162  | -2.19379 |
| C | 4.46382  | -0.08107 | -1.90402 |
| C | 6.40647  | 1.40874  | -1.68056 |
| H | 2.07702  | -0.87246 | -1.15540 |
| H | 4.11053  | -1.05232 | -2.26214 |
| H | 3.79083  | 1.69401  | -0.84507 |
| C | 7.68584  | 1.90543  | -2.28667 |
| H | 5.75167  | 2.19982  | -1.31134 |
| H | 6.38154  | -0.42421 | -2.79917 |
| H | 7.44957  | 2.48494  | -3.19015 |
| H | 8.24689  | 2.56756  | -1.61766 |
| H | 8.34388  | 1.08343  | -2.59543 |
| C | 7.02338  | 0.87855  | 0.24352  |
| C | 5.87011  | 0.53818  | 0.95072  |
| C | 5.62418  | -0.85555 | 0.81871  |
| C | 6.65705  | -1.42315 | 0.13054  |
| C | 7.73320  | -0.41675 | -0.06856 |
| H | 7.56707  | 1.80237  | 0.43648  |
| H | 5.23042  | 1.23619  | 1.48655  |
| H | 4.73114  | -1.37197 | 1.16405  |
| H | 6.74321  | -2.46986 | -0.14662 |

---

|   |          |          |          |
|---|----------|----------|----------|
| H | 8.50794  | -0.57435 | 0.70308  |
| H | 8.24823  | -0.47288 | -1.03354 |
| C | -2.38812 | 3.92788  | -2.55484 |
| H | -2.23024 | 4.01117  | -3.63562 |
| H | -3.43413 | 4.21960  | -2.35632 |
| O | -1.47867 | 4.79312  | -1.93017 |

M06/lanl2dz-6-31G(d) Energy = -2646.113213

M06/lanl2dz-6-31G(d) Free Energy = -2645.471054

M06/def2-TZVP Derived free energy = -2646.578937

M06/def2-TZVP Derived free energy in solution (toluene) = -2646.610017

M06/def2-TZVP Derived free energy in solution (nitromethane) = -2646.634542

Number of Imaginary Frequencies = 1 (-365.15)

M06/lanl2dz-6-31G(d) Geometry

|   |          |          |          |
|---|----------|----------|----------|
| C | 0.89267  | 2.83226  | -0.17917 |
| C | 1.02308  | 4.36191  | -0.06678 |
| C | -1.35159 | 3.46733  | -1.12444 |
| N | -0.52079 | 2.53843  | -0.53456 |
| C | -1.18027 | 1.35700  | -0.47645 |
| N | -2.36515 | 1.63836  | -1.04358 |
| N | -2.49171 | 2.94129  | -1.45416 |
| C | 0.55918  | 4.67610  | 1.36895  |
| C | 1.03205  | 3.45229  | 2.10378  |
| C | 1.25362  | 2.39792  | 1.21047  |
| C | 1.78507  | 1.18751  | 1.64131  |
| C | 2.03747  | 1.01730  | 3.00121  |
| C | 1.78559  | 2.05392  | 3.89962  |
| C | 1.29726  | 3.28221  | 3.45666  |
| C | -3.44018 | 0.71609  | -1.20695 |
| C | -3.23802 | -0.44034 | -2.01102 |
| C | -4.25081 | -1.44261 | -2.00797 |
| C | -5.44437 | -1.22208 | -1.28056 |
| C | -5.64429 | -0.06678 | -0.57425 |
| C | -4.62344 | 0.90256  | -0.52450 |
| C | -2.07898 | -0.64803 | -2.80191 |

---

|    |          |          |          |
|----|----------|----------|----------|
| C  | -1.92100 | -1.81258 | -3.51327 |
| C  | -2.90214 | -2.82548 | -3.47258 |
| C  | -4.04708 | -2.63509 | -2.74303 |
| H  | 1.51281  | 2.39664  | -0.97032 |
| H  | 2.09355  | 4.59400  | -0.13996 |
| H  | -0.53668 | 4.77424  | 1.42687  |
| H  | 0.98274  | 5.61386  | 1.74746  |
| H  | 2.00744  | 0.39370  | 0.92509  |
| H  | 2.43567  | 0.07012  | 3.36346  |
| H  | 1.98879  | 1.90787  | 4.95892  |
| H  | 1.13539  | 4.09612  | 4.16207  |
| H  | -6.21643 | -1.99025 | -1.29736 |
| H  | -6.56363 | 0.11044  | -0.02188 |
| Cl | -4.87341 | 2.28597  | 0.49585  |
| H  | -1.32296 | 0.13246  | -2.87027 |
| H  | -1.03784 | -1.94738 | -4.13656 |
| H  | -2.75607 | -3.74451 | -4.03565 |
| H  | -4.82606 | -3.39635 | -2.72082 |
| Au | -0.44103 | -0.59749 | 0.11600  |
| C  | 0.25667  | -2.46491 | 0.62488  |
| C  | -0.57931 | -3.19794 | 1.48651  |
| C  | 1.45102  | -3.00882 | 0.17651  |
| C  | -0.21516 | -4.49002 | 1.85844  |
| C  | 1.81123  | -4.30368 | 0.56392  |
| H  | 2.11674  | -2.44185 | -0.47734 |
| C  | 0.97571  | -5.04148 | 1.39357  |
| H  | -0.85448 | -5.07321 | 2.52088  |
| H  | 2.74409  | -4.73884 | 0.20715  |
| H  | 1.25384  | -6.05178 | 1.68769  |
| C  | -1.85145 | -1.14087 | 1.49027  |
| C  | -2.84299 | -0.28700 | 1.93477  |
| C  | -1.75090 | -2.46342 | 1.95458  |
| C  | -3.80562 | -0.77065 | 2.82526  |
| H  | -2.89018 | 0.75004  | 1.61034  |
| C  | -2.72143 | -2.92606 | 2.84192  |
| C  | -3.74867 | -2.08699 | 3.26511  |

---

|   |          |          |          |
|---|----------|----------|----------|
| H | -4.59600 | -0.10387 | 3.16775  |
| H | -2.67132 | -3.94843 | 3.21586  |
| H | -4.50031 | -2.46318 | 3.95648  |
| O | 1.23727  | -0.09327 | -1.28554 |
| C | 3.01635  | -0.82787 | -2.63596 |
| C | 1.67236  | -0.80360 | -2.23838 |
| C | 5.34777  | -0.11100 | -2.07371 |
| C | 3.96454  | -0.12742 | -1.90200 |
| C | 6.18706  | 0.72789  | -1.31293 |
| H | 0.95987  | -1.45912 | -2.77273 |
| H | 3.57340  | 0.49051  | -1.08548 |
| H | 3.30402  | -1.44500 | -3.48571 |
| C | 7.55330  | 1.06492  | -1.84603 |
| H | 5.68470  | 1.55383  | -0.80372 |
| H | 5.79441  | -0.75234 | -2.83818 |
| H | 8.09201  | 0.16705  | -2.17635 |
| H | 7.45178  | 1.72273  | -2.71972 |
| H | 8.17411  | 1.58984  | -1.11201 |
| C | 6.68955  | -0.29626 | 0.36958  |
| C | 5.53047  | -0.25281 | 1.15218  |
| C | 4.69876  | -1.34970 | 0.83280  |
| C | 5.36365  | -2.15625 | -0.05647 |
| C | 6.77052  | -1.69737 | -0.18293 |
| H | 7.58316  | 0.26496  | 0.63947  |
| H | 5.26138  | 0.55777  | 1.82624  |
| H | 3.68374  | -1.51040 | 1.19360  |
| H | 4.96677  | -3.05502 | -0.52176 |
| H | 7.38924  | -2.29475 | 0.51137  |
| H | 7.21911  | -1.81158 | -1.17513 |
| O | 0.42745  | 5.06506  | -1.12441 |
| C | -0.96063 | 4.90048  | -1.24435 |
| H | -1.50645 | 5.48511  | -0.48308 |
| H | -1.25476 | 5.29202  | -2.22393 |



---

Top, towards, 2, exo, away

M06/lanl2dz-6-31G(d) Energy = -2646.116339

M06/lanl2dz-6-31G(d) Free Energy = -2645.476622

M06/def2-TZVP Derived free energy = -2646.587511

M06/def2-TZVP Derived free energy in solution (toluene) = -2646.618516

M06/def2-TZVP Derived free energy in solution (nitromethane) = -2646.643749

Number of Imaginary Frequencies = 1 (-396.46)

M06/lanl2dz-6-31G(d) Geometry

|   |          |          |          |
|---|----------|----------|----------|
| C | -1.77068 | -2.05867 | -0.45136 |
| C | -2.62339 | -3.20141 | -1.06268 |
| C | 0.08420  | -3.23929 | -1.66179 |
| N | -0.37205 | -2.20269 | -0.87472 |
| C | 0.65544  | -1.34837 | -0.65936 |
| N | 1.66732  | -1.91121 | -1.34590 |
| N | 1.33371  | -3.08328 | -1.97257 |
| C | -3.75759 | -3.41373 | -0.06373 |
| C | -3.18565 | -2.92986 | 1.23800  |
| C | -2.03597 | -2.16611 | 1.02799  |
| C | -1.37691 | -1.56082 | 2.09223  |
| C | -1.88020 | -1.74122 | 3.37922  |
| C | -3.02461 | -2.50916 | 3.59128  |
| C | -3.68568 | -3.10780 | 2.52160  |
| C | 2.98940  | -1.37901 | -1.41770 |
| C | 3.17057  | -0.08559 | -1.98426 |
| C | 4.43889  | 0.54282  | -1.82096 |
| C | 5.48881  | -0.16791 | -1.19225 |
| C | 5.30880  | -1.44241 | -0.72606 |
| C | 4.03897  | -2.04574 | -0.82370 |
| C | 2.14117  | 0.62244  | -2.65669 |
| C | 2.35031  | 1.90652  | -3.09826 |
| C | 3.59327  | 2.54318  | -2.90054 |
| C | 4.61670  | 1.86751  | -2.28579 |
| H | -2.11019 | -1.08399 | -0.83827 |
| H | -2.96969 | -2.94620 | -2.08083 |

---

|    |          |          |          |
|----|----------|----------|----------|
| H  | -4.05571 | -4.46950 | -0.05902 |
| H  | -4.64568 | -2.82668 | -0.34710 |
| H  | -0.47511 | -0.96558 | 1.93850  |
| H  | -1.37094 | -1.28208 | 4.22420  |
| H  | -3.40232 | -2.64524 | 4.60288  |
| H  | -4.57776 | -3.70980 | 2.68992  |
| H  | 6.45751  | 0.31834  | -1.08301 |
| H  | 6.11554  | -1.99067 | -0.24616 |
| Cl | 3.82475  | -3.61111 | -0.10442 |
| H  | 1.17964  | 0.14443  | -2.83769 |
| H  | 1.54846  | 2.43370  | -3.61208 |
| H  | 3.74123  | 3.56254  | -3.24994 |
| H  | 5.58887  | 2.33928  | -2.14599 |
| Au | 0.87671  | 0.66287  | 0.18402  |
| C  | 1.41171  | 2.58497  | 0.67978  |
| C  | 2.53072  | 2.69086  | 1.52423  |
| C  | 0.84129  | 3.71625  | 0.11892  |
| C  | 3.04195  | 3.95193  | 1.82312  |
| C  | 1.36293  | 4.97625  | 0.42642  |
| H  | 0.00623  | 3.64264  | -0.57737 |
| C  | 2.45414  | 5.09037  | 1.27980  |
| H  | 3.90839  | 4.05173  | 2.47665  |
| H  | 0.91481  | 5.86766  | -0.00961 |
| H  | 2.85866  | 6.07245  | 1.51728  |
| C  | 2.39448  | 0.27727  | 1.50073  |
| C  | 2.72960  | -1.00038 | 1.90787  |
| C  | 3.05402  | 1.41376  | 1.99777  |
| C  | 3.78683  | -1.16781 | 2.80744  |
| H  | 2.19329  | -1.87498 | 1.54234  |
| C  | 4.11050  | 1.22316  | 2.88753  |
| C  | 4.47878  | -0.06033 | 3.28135  |
| H  | 4.06494  | -2.17255 | 3.12147  |
| H  | 4.64468  | 2.08507  | 3.28673  |
| H  | 5.30437  | -0.19315 | 3.97786  |
| O  | -1.00159 | 1.15751  | -0.97349 |
| C  | -3.19956 | 2.00951  | -0.81340 |

---

|   |          |          |          |
|---|----------|----------|----------|
| C | -1.89592 | 1.78032  | -0.34204 |
| C | -5.44160 | 2.96126  | -0.29279 |
| C | -4.09111 | 2.71653  | -0.02096 |
| C | -6.09999 | 2.46225  | -1.42324 |
| H | -1.65948 | 2.18570  | 0.66271  |
| H | -3.70159 | 3.10256  | 0.92545  |
| H | -3.45442 | 1.64701  | -1.80915 |
| C | -7.41211 | 3.05703  | -1.84475 |
| H | -5.47032 | 2.13255  | -2.25192 |
| H | -6.01548 | 3.54262  | 0.42964  |
| H | -7.98230 | 2.40454  | -2.51533 |
| H | -8.04397 | 3.31105  | -0.98445 |
| H | -7.22026 | 3.99182  | -2.38970 |
| C | -6.66268 | 0.52751  | -0.90839 |
| C | -5.47232 | -0.16570 | -0.68603 |
| C | -5.11295 | -0.07581 | 0.68539  |
| C | -6.10697 | 0.57733  | 1.35730  |
| C | -7.26845 | 0.78068  | 0.45009  |
| H | -7.27629 | 0.35455  | -1.79134 |
| H | -4.87799 | -0.64518 | -1.46248 |
| H | -4.17416 | -0.42312 | 1.11487  |
| H | -6.11077 | 0.81923  | 2.41609  |
| H | -8.00869 | -0.01643 | 0.64402  |
| H | -7.80208 | 1.72813  | 0.57930  |
| C | -0.83439 | -4.34930 | -2.03467 |
| H | -1.21850 | -4.20199 | -3.06084 |
| H | -0.30520 | -5.30702 | -2.00598 |
| O | -1.88471 | -4.40259 | -1.10669 |

M06/lanl2dz-6-31G(d) Energy = -2646.112818

M06/lanl2dz-6-31G(d) Free Energy = -2645.474860

M06/def2-TZVP Derived free energy = -2646.583051

M06/def2-TZVP Derived free energy in solution (toluene) = -2646.613986

M06/def2-TZVP Derived free energy in solution (nitromethane) = -2646.638847

Number of Imaginary Frequencies = 1 (-375.44)

---

M06/lanl2dz-6-31G(d) Geometry

|    |          |          |          |
|----|----------|----------|----------|
| C  | -1.86242 | 1.90137  | -0.59123 |
| C  | -2.86910 | 3.02968  | -0.27557 |
| C  | -1.11731 | 2.41085  | 1.76909  |
| N  | -0.92881 | 1.79316  | 0.55259  |
| C  | 0.20533  | 1.05936  | 0.61826  |
| N  | 0.64311  | 1.28796  | 1.86780  |
| N  | -0.16438 | 2.11798  | 2.60111  |
| C  | -2.22223 | 4.31603  | -0.81416 |
| C  | -1.39279 | 3.79471  | -1.95132 |
| C  | -1.19201 | 2.41584  | -1.83402 |
| C  | -0.46898 | 1.71581  | -2.79284 |
| C  | 0.07969  | 2.41660  | -3.86310 |
| C  | -0.11143 | 3.79366  | -3.97539 |
| C  | -0.85508 | 4.49050  | -3.02610 |
| C  | 1.86507  | 0.78568  | 2.40670  |
| C  | 2.01206  | -0.61506 | 2.60003  |
| C  | 3.30348  | -1.10789 | 2.94746  |
| C  | 4.36434  | -0.19350 | 3.15112  |
| C  | 4.18207  | 1.15593  | 3.00644  |
| C  | 2.92143  | 1.64559  | 2.61284  |
| C  | 0.95337  | -1.54003 | 2.41538  |
| C  | 1.18127  | -2.88943 | 2.53281  |
| C  | 2.46362  | -3.38000 | 2.85726  |
| C  | 3.49757  | -2.50425 | 3.07041  |
| H  | -2.34087 | 0.91660  | -0.70103 |
| H  | -3.77585 | 2.82218  | -0.86022 |
| H  | -1.58603 | 4.79933  | -0.05616 |
| H  | -2.97229 | 5.05816  | -1.11271 |
| H  | -0.33449 | 0.63594  | -2.71923 |
| H  | 0.65110  | 1.88486  | -4.62094 |
| H  | 0.31768  | 4.32769  | -4.82100 |
| H  | -1.01437 | 5.56314  | -3.12824 |
| H  | 5.34389  | -0.58284 | 3.42591  |
| H  | 4.99601  | 1.86027  | 3.15725  |
| Cl | 2.76263  | 3.34973  | 2.31499  |

---

|    |          |          |          |
|----|----------|----------|----------|
| H  | -0.04768 | -1.18394 | 2.17860  |
| H  | 0.36102  | -3.58779 | 2.37715  |
| H  | 2.62631  | -4.45192 | 2.94460  |
| H  | 4.48967  | -2.86883 | 3.33465  |
| Au | 0.98178  | -0.57729 | -0.60210 |
| C  | 1.82056  | -2.25709 | -1.43576 |
| C  | 3.19087  | -2.15282 | -1.73421 |
| C  | 1.15397  | -3.46192 | -1.58626 |
| C  | 3.86700  | -3.26872 | -2.22264 |
| C  | 1.84309  | -4.57479 | -2.07735 |
| H  | 0.10404  | -3.56214 | -1.31136 |
| C  | 3.19122  | -4.47333 | -2.39885 |
| H  | 4.92806  | -3.20570 | -2.46347 |
| H  | 1.32185  | -5.52250 | -2.20243 |
| H  | 3.72560  | -5.34056 | -2.78211 |
| C  | 2.86887  | 0.11425  | -0.95804 |
| C  | 3.24233  | 1.42420  | -0.71984 |
| C  | 3.76496  | -0.83508 | -1.47675 |
| C  | 4.56735  | 1.80108  | -0.95722 |
| H  | 2.52871  | 2.16042  | -0.35304 |
| C  | 5.08220  | -0.43787 | -1.70339 |
| C  | 5.48043  | 0.86936  | -1.43654 |
| H  | 4.87470  | 2.82724  | -0.76101 |
| H  | 5.80422  | -1.15206 | -2.09885 |
| H  | 6.51249  | 1.16378  | -1.61750 |
| O  | -1.13054 | -1.34208 | -0.38634 |
| C  | -3.10318 | -2.15280 | -1.41942 |
| C  | -1.75381 | -1.77270 | -1.40047 |
| C  | -5.22444 | -2.59294 | -0.23562 |
| C  | -3.90418 | -2.14031 | -0.28625 |
| C  | -5.96450 | -2.75396 | 0.95055  |
| H  | -1.20569 | -1.86804 | -2.35649 |
| H  | -3.44582 | -1.79366 | 0.64604  |
| H  | -3.50797 | -2.51428 | -2.36468 |
| C  | -7.06331 | -3.78319 | 0.98201  |
| H  | -5.38953 | -2.68153 | 1.87677  |

---

|   |          |          |          |
|---|----------|----------|----------|
| H | -5.68359 | -2.91736 | -1.17436 |
| H | -7.67136 | -3.72238 | 1.89107  |
| H | -7.72813 | -3.69142 | 0.11284  |
| H | -6.62188 | -4.78847 | 0.94984  |
| C | -7.08154 | -1.05942 | 1.18098  |
| C | -6.15405 | -0.19252 | 1.76386  |
| C | -5.43067 | 0.48188  | 0.75395  |
| C | -5.96865 | 0.14649  | -0.46310 |
| C | -7.22874 | -0.61492 | -0.25146 |
| H | -7.91882 | -1.47224 | 1.74119  |
| H | -5.94952 | -0.12567 | 2.82975  |
| H | -4.57988 | 1.13818  | 0.92753  |
| H | -5.61120 | 0.47841  | -1.43510 |
| H | -8.06970 | 0.10162  | -0.28724 |
| H | -7.44849 | -1.39095 | -0.99113 |
| C | -2.28746 | 3.29914  | 2.00954  |
| H | -2.70930 | 3.10812  | 3.00184  |
| H | -1.97302 | 4.35565  | 1.98923  |
| O | -3.30099 | 3.04312  | 1.06678  |

M06/lanl2dz-6-31G(d) Energy = -2646.112818

M06/lanl2dz-6-31G(d) Free Energy = -2645.474861

M06/def2-TZVP Derived free energy = -2646.583052

M06/def2-TZVP Derived free energy in solution (toluene) = -2646.613987

M06/def2-TZVP Derived free energy in solution (nitromethane) = -2646.638848

Number of Imaginary Frequencies = 1 (-375.44)

M06/lanl2dz-6-31G(d) Geometry

|   |          |         |          |
|---|----------|---------|----------|
| C | -1.86241 | 1.90138 | -0.59123 |
| C | -2.86910 | 3.02968 | -0.27557 |
| C | -1.11732 | 2.41085 | 1.76909  |
| N | -0.92882 | 1.79316 | 0.55259  |
| C | 0.20533  | 1.05936 | 0.61826  |
| N | 0.64310  | 1.28796 | 1.86780  |
| N | -0.16439 | 2.11797 | 2.60112  |
| C | -2.22223 | 4.31603 | -0.81416 |

---

|    |          |          |          |
|----|----------|----------|----------|
| C  | -1.39279 | 3.79473  | -1.95131 |
| C  | -1.19201 | 2.41585  | -1.83401 |
| C  | -0.46898 | 1.71582  | -2.79284 |
| C  | 0.07970  | 2.41662  | -3.86309 |
| C  | -0.11142 | 3.79368  | -3.97538 |
| C  | -0.85507 | 4.49051  | -3.02609 |
| C  | 1.86506  | 0.78567  | 2.40671  |
| C  | 2.01205  | -0.61508 | 2.60003  |
| C  | 3.30346  | -1.10791 | 2.94746  |
| C  | 4.36433  | -0.19352 | 3.15113  |
| C  | 4.18206  | 1.15590  | 3.00646  |
| C  | 2.92142  | 1.64558  | 2.61285  |
| C  | 0.95335  | -1.54004 | 2.41537  |
| C  | 1.18125  | -2.88944 | 2.53278  |
| C  | 2.46360  | -3.38001 | 2.85723  |
| C  | 3.49755  | -2.50427 | 3.07039  |
| H  | -2.34086 | 0.91661  | -0.70104 |
| H  | -3.77585 | 2.82219  | -0.86023 |
| H  | -1.58604 | 4.79934  | -0.05615 |
| H  | -2.97229 | 5.05817  | -1.11271 |
| H  | -0.33448 | 0.63595  | -2.71923 |
| H  | 0.65112  | 1.88489  | -4.62094 |
| H  | 0.31770  | 4.32771  | -4.82099 |
| H  | -1.01437 | 5.56316  | -3.12823 |
| H  | 5.34387  | -0.58287 | 3.42592  |
| H  | 4.99600  | 1.86024  | 3.15728  |
| Cl | 2.76262  | 3.34972  | 2.31501  |
| H  | -0.04770 | -1.18394 | 2.17859  |
| H  | 0.36100  | -3.58780 | 2.37711  |
| H  | 2.62629  | -4.45194 | 2.94457  |
| H  | 4.48965  | -2.86886 | 3.33464  |
| Au | 0.98178  | -0.57728 | -0.60210 |
| C  | 1.82057  | -2.25708 | -1.43576 |
| C  | 3.19088  | -2.15281 | -1.73421 |
| C  | 1.15398  | -3.46191 | -1.58628 |
| C  | 3.86701  | -3.26871 | -2.22265 |

---

|   |          |          |          |
|---|----------|----------|----------|
| C | 1.84310  | -4.57478 | -2.07737 |
| H | 0.10404  | -3.56214 | -1.31137 |
| C | 3.19123  | -4.47332 | -2.39886 |
| H | 4.92807  | -3.20568 | -2.46347 |
| H | 1.32186  | -5.52249 | -2.20245 |
| H | 3.72561  | -5.34055 | -2.78212 |
| C | 2.86887  | 0.11426  | -0.95803 |
| C | 3.24233  | 1.42420  | -0.71983 |
| C | 3.76496  | -0.83508 | -1.47674 |
| C | 4.56736  | 1.80109  | -0.95720 |
| H | 2.52871  | 2.16042  | -0.35302 |
| C | 5.08220  | -0.43786 | -1.70338 |
| C | 5.48043  | 0.86937  | -1.43652 |
| H | 4.87471  | 2.82724  | -0.76099 |
| H | 5.80423  | -1.15205 | -2.09883 |
| H | 6.51250  | 1.16379  | -1.61747 |
| O | -1.13054 | -1.34208 | -0.38635 |
| C | -3.10318 | -2.15279 | -1.41943 |
| C | -1.75381 | -1.77269 | -1.40048 |
| C | -5.22444 | -2.59294 | -0.23564 |
| C | -3.90418 | -2.14031 | -0.28626 |
| C | -5.96449 | -2.75397 | 0.95054  |
| H | -1.20569 | -1.86802 | -2.35651 |
| H | -3.44582 | -1.79367 | 0.64603  |
| H | -3.50797 | -2.51427 | -2.36470 |
| C | -7.06330 | -3.78319 | 0.98200  |
| H | -5.38952 | -2.68155 | 1.87675  |
| H | -5.68359 | -2.91735 | -1.17438 |
| H | -7.67135 | -3.72239 | 1.89105  |
| H | -7.72813 | -3.69142 | 0.11282  |
| H | -6.62188 | -4.78848 | 0.94981  |
| C | -7.08153 | -1.05943 | 1.18098  |
| C | -6.15404 | -0.19253 | 1.76387  |
| C | -5.43066 | 0.48187  | 0.75396  |
| C | -5.96864 | 0.14648  | -0.46310 |
| C | -7.22873 | -0.61492 | -0.25145 |



---

|   |          |          |          |
|---|----------|----------|----------|
| H | -7.91881 | -1.47225 | 1.74119  |
| H | -5.94950 | -0.12569 | 2.82975  |
| H | -4.57987 | 1.13817  | 0.92753  |
| H | -5.61120 | 0.47841  | -1.43510 |
| H | -8.06969 | 0.10162  | -0.28723 |
| H | -7.44850 | -1.39095 | -0.99113 |
| O | -3.30099 | 3.04312  | 1.06678  |
| C | -2.28747 | 3.29913  | 2.00954  |
| H | -2.70931 | 3.10811  | 3.00184  |
| H | -1.97303 | 4.35564  | 1.98923  |

M06/lanl2dz-6-31G(d) Energy = -2646.113423

M06/lanl2dz-6-31G(d) Free Energy = -2645.475871

M06/def2-TZVP Derived free energy = -2646.585567

M06/def2-TZVP Derived free energy in solution (toluene) = -2646.617099

M06/def2-TZVP Derived free energy in solution (nitromethane) = -2646.642590

Number of Imaginary Frequencies = 1 (-390.26)

M06/lanl2dz-6-31G(d) Geometry

|   |          |          |          |
|---|----------|----------|----------|
| C | -1.52312 | 1.96364  | -0.81211 |
| C | -2.31651 | 3.27190  | -0.62989 |
| C | -1.15015 | 2.33423  | 1.65998  |
| N | -0.84619 | 1.68590  | 0.48083  |
| C | 0.19462  | 0.84972  | 0.71433  |
| N | 0.46789  | 1.05157  | 2.01069  |
| N | -0.35852 | 1.96333  | 2.61912  |
| C | -1.29339 | 4.38935  | -0.90546 |
| C | -0.39008 | 3.73180  | -1.91028 |
| C | -0.55105 | 2.34162  | -1.89268 |
| C | 0.12776  | 1.53133  | -2.79415 |
| C | 1.02441  | 2.12040  | -3.68149 |
| C | 1.21253  | 3.50150  | -3.67716 |
| C | 0.49589  | 4.31802  | -2.80378 |
| C | 1.58655  | 0.52612  | 2.72688  |
| C | 1.60211  | -0.83769 | 3.12233  |
| C | 2.75727  | -1.32062 | 3.80638  |

---

|    |          |          |          |
|----|----------|----------|----------|
| C  | 3.82162  | -0.43188 | 4.08664  |
| C  | 3.77685  | 0.88191  | 3.70084  |
| C  | 2.64911  | 1.35869  | 3.00542  |
| C  | 0.53795  | -1.73213 | 2.85542  |
| C  | 0.63139  | -3.05021 | 3.22896  |
| C  | 1.77453  | -3.53293 | 3.90073  |
| C  | 2.81116  | -2.68206 | 4.18730  |
| H  | -2.17344 | 1.10630  | -1.04044 |
| H  | -3.07981 | 3.29648  | -1.41864 |
| H  | -0.73774 | 4.66926  | 0.00324  |
| H  | -1.77270 | 5.30405  | -1.27430 |
| H  | -0.02392 | 0.45114  | -2.81289 |
| H  | 1.58264  | 1.49673  | -4.37732 |
| H  | 1.91566  | 3.94906  | -4.37691 |
| H  | 0.62438  | 5.39932  | -2.82908 |
| H  | 4.69396  | -0.81201 | 4.61693  |
| H  | 4.59601  | 1.56507  | 3.90942  |
| Cl | 2.64470  | 3.01851  | 2.48411  |
| H  | -0.35293 | -1.38110 | 2.33974  |
| H  | -0.18977 | -3.72884 | 3.00626  |
| H  | 1.82844  | -4.57961 | 4.19208  |
| H  | 3.69759  | -3.04032 | 4.70965  |
| Au | 0.97895  | -0.76897 | -0.50548 |
| C  | 1.71510  | -2.31447 | -1.63127 |
| C  | 2.96129  | -2.07253 | -2.23599 |
| C  | 1.06298  | -3.52457 | -1.79786 |
| C  | 3.53994  | -3.06961 | -3.01737 |
| C  | 1.65496  | -4.51682 | -2.58542 |
| H  | 0.10537  | -3.71319 | -1.31331 |
| C  | 2.88567  | -4.28707 | -3.18956 |
| H  | 4.50724  | -2.90503 | -3.49213 |
| H  | 1.15218  | -5.47324 | -2.71953 |
| H  | 3.34446  | -5.06311 | -3.79929 |
| C  | 2.74347  | 0.05798  | -1.10885 |
| C  | 3.12371  | 1.34085  | -0.76211 |
| C  | 3.51904  | -0.75257 | -1.95429 |

---

|   |          |          |          |
|---|----------|----------|----------|
| C | 4.33184  | 1.84030  | -1.25534 |
| H | 2.50079  | 1.96628  | -0.12423 |
| C | 4.71714  | -0.22964 | -2.44024 |
| C | 5.12019  | 1.05583  | -2.08913 |
| H | 4.64648  | 2.84599  | -0.98128 |
| H | 5.34414  | -0.83172 | -3.09752 |
| H | 6.06056  | 1.44715  | -2.47293 |
| O | -0.99912 | -1.75388 | -0.00149 |
| C | -3.30136 | -1.88237 | -0.52590 |
| C | -1.95548 | -1.59317 | -0.80092 |
| C | -5.65578 | -1.66435 | -1.34410 |
| C | -4.26862 | -1.51811 | -1.44969 |
| C | -6.30236 | -2.30733 | -0.28048 |
| H | -1.74707 | -1.18549 | -1.81418 |
| H | -3.90185 | -1.04730 | -2.36784 |
| H | -3.54083 | -2.35508 | 0.42639  |
| C | -7.69960 | -2.82248 | -0.47547 |
| H | -5.68004 | -2.92750 | 0.36777  |
| H | -6.26954 | -1.27815 | -2.15915 |
| H | -8.18964 | -3.09333 | 0.46590  |
| H | -8.33333 | -2.09929 | -1.00422 |
| H | -7.66152 | -3.73032 | -1.09350 |
| C | -6.64793 | -0.84149 | 1.15952  |
| C | -5.37812 | -0.53553 | 1.64232  |
| C | -4.84423 | 0.56209  | 0.91822  |
| C | -5.78712 | 1.02151  | 0.04533  |
| C | -7.07584 | 0.32064  | 0.29945  |
| H | -7.36127 | -1.42672 | 1.73710  |
| H | -4.85588 | -1.08313 | 2.42371  |
| H | -3.83777 | 0.95585  | 1.02520  |
| H | -5.66396 | 1.85075  | -0.64582 |
| H | -7.71436 | 0.97760  | 0.91721  |
| H | -7.66205 | 0.07648  | -0.59306 |
| O | -3.03539 | 3.32243  | 0.57867  |
| C | -2.23977 | 3.34968  | 1.73768  |
| H | -1.80657 | 4.34873  | 1.91185  |

---

H -2.89878 3.13119 2.58613

M06/lanl2dz-6-31G(d) Energy = -2646.114793

M06/lanl2dz-6-31G(d) Free Energy = -2645.475946

M06/def2-TZVP Derived free energy = -2646.586391

M06/def2-TZVP Derived free energy in solution (toluene) = -2646.617543

M06/def2-TZVP Derived free energy in solution (nitromethane) = -2646.642834

Number of Imaginary Frequencies = 1 (-378.06)

M06/lanl2dz-6-31G(d) Geometry

|   |          |          |          |
|---|----------|----------|----------|
| C | 1.44955  | 2.20976  | -0.74704 |
| C | 2.13932  | 3.43913  | -1.38260 |
| C | -0.62561 | 3.48479  | -1.34094 |
| N | -0.00612 | 2.36747  | -0.82439 |
| C | -0.95333 | 1.44119  | -0.55004 |
| N | -2.09083 | 2.04691  | -0.93770 |
| N | -1.90898 | 3.31408  | -1.42976 |
| C | 3.48690  | 3.52266  | -0.67169 |
| C | 3.21728  | 2.89796  | 0.66979  |
| C | 2.03961  | 2.14748  | 0.63760  |
| C | 1.59842  | 1.46182  | 1.76235  |
| C | 2.34579  | 1.55164  | 2.93663  |
| C | 3.51651  | 2.30780  | 2.97425  |
| C | 3.96325  | 2.98167  | 1.83802  |
| C | -3.38221 | 1.44341  | -0.89072 |
| C | -3.58815 | 0.23943  | -1.62243 |
| C | -4.77726 | -0.50266 | -1.36707 |
| C | -5.74968 | 0.03076  | -0.48759 |
| C | -5.56578 | 1.23759  | 0.13274  |
| C | -4.35679 | 1.93791  | -0.05248 |
| C | -2.64703 | -0.28052 | -2.54817 |
| C | -2.85069 | -1.50376 | -3.13954 |
| C | -4.00404 | -2.26146 | -2.84759 |
| C | -4.95148 | -1.76096 | -1.99124 |
| H | 1.68756  | 1.30283  | -1.32169 |
| H | 2.22336  | 3.33753  | -2.47907 |

---

|    |          |          |          |
|----|----------|----------|----------|
| H  | 3.82416  | 4.56526  | -0.62189 |
| H  | 4.24658  | 2.95998  | -1.23795 |
| H  | 0.67418  | 0.88120  | 1.74858  |
| H  | 2.00253  | 1.03874  | 3.83308  |
| H  | 4.08189  | 2.38100  | 3.90170  |
| H  | 4.87209  | 3.58235  | 1.87343  |
| H  | -6.66146 | -0.53775 | -0.30846 |
| H  | -6.31380 | 1.65128  | 0.80457  |
| Cl | -4.10020 | 3.38577  | 0.86864  |
| H  | -1.76030 | 0.29727  | -2.80509 |
| H  | -2.11635 | -1.88713 | -3.84558 |
| H  | -4.14582 | -3.23357 | -3.31468 |
| H  | -5.85866 | -2.32468 | -1.77553 |
| Au | -0.89359 | -0.68226 | -0.00195 |
| C  | -1.19122 | -2.69705 | 0.24414  |
| C  | -2.18165 | -3.04369 | 1.17934  |
| C  | -0.59917 | -3.66060 | -0.55554 |
| C  | -2.54455 | -4.38160 | 1.31912  |
| C  | -0.97112 | -4.99979 | -0.40439 |
| H  | 0.13497  | -3.38666 | -1.31319 |
| C  | -1.93532 | -5.35499 | 0.53222  |
| H  | -3.31062 | -4.67092 | 2.03854  |
| H  | -0.50743 | -5.76313 | -1.02715 |
| H  | -2.22316 | -6.39838 | 0.64655  |
| C  | -2.22937 | -0.65521 | 1.54645  |
| C  | -2.58484 | 0.50250  | 2.21289  |
| C  | -2.73428 | -1.91289 | 1.91833  |
| C  | -3.51382 | 0.42486  | 3.25514  |
| H  | -2.15799 | 1.46723  | 1.94180  |
| C  | -3.67100 | -1.96538 | 2.94925  |
| C  | -4.06351 | -0.80197 | 3.60611  |
| H  | -3.80683 | 1.33383  | 3.77824  |
| H  | -4.08664 | -2.92497 | 3.25607  |
| H  | -4.79307 | -0.85989 | 4.41165  |
| O  | 0.83837  | -0.82756 | -1.44117 |
| C  | 3.17593  | -1.15379 | -1.51823 |

---

|   |          |          |          |
|---|----------|----------|----------|
| C | 1.90301  | -1.30445 | -0.95658 |
| C | 5.59485  | -1.72576 | -1.33173 |
| C | 4.26544  | -1.74440 | -0.90068 |
| C | 6.60154  | -2.50861 | -0.73610 |
| H | 1.84696  | -1.88206 | -0.01126 |
| H | 4.06007  | -2.31772 | 0.01187  |
| H | 3.28362  | -0.60137 | -2.45332 |
| C | 7.80665  | -2.88609 | -1.55519 |
| H | 6.24831  | -3.29654 | -0.06673 |
| H | 5.84429  | -1.13411 | -2.21664 |
| H | 7.51185  | -3.61568 | -2.32150 |
| H | 8.22981  | -2.01826 | -2.07816 |
| H | 8.59763  | -3.34703 | -0.95389 |
| C | 7.48563  | -1.35563 | 0.69622  |
| C | 6.54181  | -1.36720 | 1.72799  |
| C | 5.60594  | -0.32805 | 1.52653  |
| C | 6.01090  | 0.42008  | 0.44961  |
| C | 7.37519  | -0.00226 | 0.04073  |
| H | 8.43866  | -1.87598 | 0.77988  |
| H | 6.47690  | -2.12613 | 2.50411  |
| H | 4.69020  | -0.16802 | 2.09192  |
| H | 5.47429  | 1.27226  | 0.03921  |
| H | 7.58915  | 0.04414  | -1.03186 |
| H | 8.10405  | 0.66510  | 0.53588  |
| C | 0.18488  | 4.67622  | -1.71973 |
| H | 0.31174  | 4.71632  | -2.81706 |
| H | -0.31889 | 5.59588  | -1.40543 |
| O | 1.42734  | 4.61751  | -1.07003 |

M06/lanl2dz-6-31G(d) Energy = -2646.114794

M06/lanl2dz-6-31G(d) Free Energy = -2645.475953

M06/def2-TZVP Derived free energy = -2646.586398

M06/def2-TZVP Derived free energy in solution (toluene) = -2646.617550

M06/def2-TZVP Derived free energy in solution (nitromethane) = -2646.642842

Number of Imaginary Frequencies = 1 (-378.04)

---

M06/lanl2dz-6-31G(d) Geometry

|    |          |          |          |
|----|----------|----------|----------|
| C  | 1.44941  | 2.20989  | -0.74697 |
| C  | 2.13908  | 3.43936  | -1.38246 |
| C  | -0.62584 | 3.48493  | -1.34052 |
| N  | -0.00627 | 2.36757  | -0.82416 |
| C  | -0.95343 | 1.44124  | -0.54980 |
| N  | -2.09099 | 2.04698  | -0.93728 |
| N  | -1.90922 | 3.31420  | -1.42923 |
| C  | 3.48674  | 3.52283  | -0.67170 |
| C  | 3.21730  | 2.89795  | 0.66973  |
| C  | 2.03963  | 2.14746  | 0.63759  |
| C  | 1.59859  | 1.46165  | 1.76231  |
| C  | 2.34610  | 1.55133  | 2.93650  |
| C  | 3.51682  | 2.30750  | 2.97408  |
| C  | 3.96340  | 2.98151  | 1.83788  |
| C  | -3.38236 | 1.44346  | -0.89020 |
| C  | -3.58837 | 0.23952  | -1.62195 |
| C  | -4.77743 | -0.50260 | -1.36649 |
| C  | -5.74974 | 0.03073  | -0.48685 |
| C  | -5.56580 | 1.23754  | 0.13352  |
| C  | -4.35685 | 1.93789  | -0.05181 |
| C  | -2.64736 | -0.28034 | -2.54786 |
| C  | -2.85108 | -1.50353 | -3.13930 |
| C  | -4.00437 | -2.26127 | -2.84725 |
| C  | -4.95171 | -1.76087 | -1.99072 |
| H  | 1.68738  | 1.30304  | -1.32176 |
| H  | 2.22300  | 3.33789  | -2.47896 |
| H  | 3.82397  | 4.56544  | -0.62180 |
| H  | 4.24637  | 2.96025  | -1.23812 |
| H  | 0.67435  | 0.88101  | 1.74858  |
| H  | 2.00296  | 1.03831  | 3.83293  |
| H  | 4.08231  | 2.38058  | 3.90146  |
| H  | 4.87225  | 3.58220  | 1.87325  |
| H  | -6.66148 | -0.53781 | -0.30762 |
| H  | -6.31374 | 1.65116  | 0.80548  |
| Cl | -4.10018 | 3.38570  | 0.86938  |

---

|    |          |          |          |
|----|----------|----------|----------|
| H  | -1.76068 | 0.29749  | -2.80484 |
| H  | -2.11683 | -1.88683 | -3.84547 |
| H  | -4.14619 | -3.23336 | -3.31439 |
| H  | -5.85884 | -2.32463 | -1.77492 |
| Au | -0.89357 | -0.68226 | -0.00192 |
| C  | -1.19106 | -2.69709 | 0.24405  |
| C  | -2.18137 | -3.04387 | 1.17933  |
| C  | -0.59900 | -3.66056 | -0.55573 |
| C  | -2.54414 | -4.38181 | 1.31908  |
| C  | -0.97081 | -4.99979 | -0.40460 |
| H  | 0.13504  | -3.38652 | -1.31344 |
| C  | -1.93489 | -5.35511 | 0.53207  |
| H  | -3.31011 | -4.67124 | 2.03856  |
| H  | -0.50711 | -5.76305 | -1.02744 |
| H  | -2.22262 | -6.39853 | 0.64639  |
| C  | -2.22920 | -0.65542 | 1.54662  |
| C  | -2.58468 | 0.50222  | 2.21318  |
| C  | -2.73402 | -1.91315 | 1.91844  |
| C  | -3.51357 | 0.42445  | 3.25551  |
| H  | -2.15788 | 1.46699  | 1.94215  |
| C  | -3.67066 | -1.96577 | 2.94942  |
| C  | -4.06317 | -0.80244 | 3.60641  |
| H  | -3.80658 | 1.33336  | 3.77871  |
| H  | -4.08622 | -2.92542 | 3.25620  |
| H  | -4.79267 | -0.86046 | 4.41200  |
| O  | 0.83822  | -0.82735 | -1.44134 |
| C  | 3.17577  | -1.15358 | -1.51877 |
| C  | 1.90293  | -1.30430 | -0.95696 |
| C  | 5.59472  | -1.72557 | -1.33263 |
| C  | 4.26536  | -1.74426 | -0.90143 |
| C  | 6.60149  | -2.50846 | -0.73718 |
| H  | 1.84701  | -1.88202 | -0.01170 |
| H  | 4.06011  | -2.31770 | 0.01108  |
| H  | 3.28334  | -0.60105 | -2.45381 |
| C  | 7.80653  | -2.88582 | -1.55644 |
| H  | 6.24834  | -3.29647 | -0.06786 |



---

|   |          |          |          |
|---|----------|----------|----------|
| H | 5.84406  | -1.13381 | -2.21750 |
| H | 7.51168  | -3.61535 | -2.32278 |
| H | 8.22961  | -2.01792 | -2.07937 |
| H | 8.59759  | -3.34678 | -0.95525 |
| C | 7.48569  | -1.35561 | 0.69517  |
| C | 6.54196  | -1.36728 | 1.72703  |
| C | 5.60605  | -0.32812 | 1.52574  |
| C | 6.01091  | 0.42010  | 0.44884  |
| C | 7.37517  | -0.00219 | 0.03981  |
| H | 8.43873  | -1.87595 | 0.77871  |
| H | 6.47713  | -2.12627 | 2.50309  |
| H | 4.69036  | -0.16816 | 2.09122  |
| H | 5.47424  | 1.27228  | 0.03854  |
| H | 7.58903  | 0.04430  | -1.03280 |
| H | 8.10407  | 0.66515  | 0.53494  |
| O | 1.42710  | 4.61768  | -1.06968 |
| C | 0.18457  | 4.67644  | -1.71925 |
| H | 0.31133  | 4.71667  | -2.81658 |
| H | -0.31919 | 5.59604  | -1.40478 |

M06/lanl2dz-6-31G(d) Energy = -2646.109587

M06/lanl2dz-6-31G(d) Free Energy = -2645.474028

M06/def2-TZVP Derived free energy = -2646.584209

M06/def2-TZVP Derived free energy in solution (toluene) = -2646.616515

M06/def2-TZVP Derived free energy in solution (nitromethane) = -2646.643206

Number of Imaginary Frequencies = 1 (-362.68)

M06/lanl2dz-6-31G(d) Geometry

|   |          |         |          |
|---|----------|---------|----------|
| C | -1.14550 | 2.61163 | -0.12137 |
| C | -2.31101 | 3.50150 | 0.36963  |
| C | -1.11918 | 1.88590 | 2.27540  |
| N | -0.68300 | 1.75364 | 0.97543  |
| C | 0.15819  | 0.69258 | 0.91056  |
| N | 0.17543  | 0.24260 | 2.17521  |
| N | -0.61611 | 0.96368 | 3.03678  |
| C | -2.27643 | 4.70271 | -0.56856 |

---

|    |          |          |          |
|----|----------|----------|----------|
| C  | -0.82190 | 4.80664  | -0.93615 |
| C  | -0.15418 | 3.61318  | -0.65628 |
| C  | 1.20203  | 3.47205  | -0.91570 |
| C  | 1.89005  | 4.55422  | -1.46114 |
| C  | 1.22608  | 5.74587  | -1.74554 |
| C  | -0.13618 | 5.88006  | -1.48591 |
| C  | 0.91032  | -0.87892 | 2.66267  |
| C  | 0.52462  | -2.18711 | 2.25934  |
| C  | 1.29685  | -3.28817 | 2.73175  |
| C  | 2.39112  | -3.04763 | 3.59630  |
| C  | 2.72589  | -1.77908 | 3.98873  |
| C  | 1.97668  | -0.68425 | 3.51392  |
| C  | -0.58152 | -2.44424 | 1.41215  |
| C  | -0.88930 | -3.72977 | 1.03946  |
| C  | -0.12021 | -4.81989 | 1.49771  |
| C  | 0.94756  | -4.59918 | 2.32977  |
| H  | -1.50626 | 1.93438  | -0.91401 |
| H  | -3.27448 | 2.95784  | 0.36882  |
| H  | -2.67627 | 5.59054  | -0.06348 |
| H  | -2.90442 | 4.51523  | -1.45303 |
| H  | 1.73365  | 2.54702  | -0.69200 |
| H  | 2.95571  | 4.46539  | -1.66222 |
| H  | 1.77838  | 6.58235  | -2.16932 |
| H  | -0.64988 | 6.81675  | -1.69861 |
| H  | 2.97239  | -3.89736 | 3.95224  |
| H  | 3.56378  | -1.59283 | 4.65547  |
| Cl | 2.44347  | 0.90971  | 4.01761  |
| H  | -1.18317 | -1.61864 | 1.03611  |
| H  | -1.73718 | -3.90935 | 0.37944  |
| H  | -0.37674 | -5.83173 | 1.19183  |
| H  | 1.54842  | -5.43122 | 2.69521  |
| Au | 1.04235  | -0.32529 | -0.80707 |
| C  | 1.88768  | -1.38010 | -2.35237 |
| C  | 3.29026  | -1.31503 | -2.42116 |
| C  | 1.16932  | -2.14473 | -3.25639 |
| C  | 3.95447  | -2.00500 | -3.43222 |

---

|   |          |          |          |
|---|----------|----------|----------|
| C | 1.84742  | -2.83475 | -4.26570 |
| H | 0.08547  | -2.23049 | -3.18691 |
| C | 3.23192  | -2.75767 | -4.35401 |
| H | 5.04103  | -1.96295 | -3.50414 |
| H | 1.28658  | -3.43557 | -4.97966 |
| H | 3.75694  | -3.29331 | -5.14262 |
| C | 3.01657  | 0.05951  | -0.44797 |
| C | 3.45720  | 0.84080  | 0.60523  |
| C | 3.90977  | -0.51585 | -1.36825 |
| C | 4.82935  | 1.05335  | 0.76565  |
| H | 2.76104  | 1.29422  | 1.30902  |
| C | 5.27354  | -0.28827 | -1.19117 |
| C | 5.72919  | 0.48924  | -0.13001 |
| H | 5.18221  | 1.66225  | 1.59640  |
| H | 5.99010  | -0.72146 | -1.88849 |
| H | 6.79743  | 0.65502  | -0.00457 |
| O | -1.08573 | -0.76641 | -1.32547 |
| C | -2.96712 | -0.71504 | -2.73085 |
| C | -1.61659 | -0.47014 | -2.43657 |
| C | -5.12455 | -1.58366 | -1.77392 |
| C | -3.74126 | -1.39141 | -1.80093 |
| C | -5.74938 | -2.40119 | -0.80550 |
| H | -0.99695 | 0.02680  | -3.20433 |
| H | -3.18305 | -1.82826 | -0.96637 |
| H | -3.38416 | -0.33906 | -3.66335 |
| C | -7.14743 | -2.89288 | -1.07190 |
| H | -5.09925 | -3.13877 | -0.32855 |
| H | -5.74554 | -1.08366 | -2.52204 |
| H | -7.59548 | -3.37801 | -0.19799 |
| H | -7.80913 | -2.07679 | -1.39135 |
| H | -7.12770 | -3.63263 | -1.88312 |
| C | -6.03053 | -1.26129 | 0.81854  |
| C | -4.74665 | -1.14082 | 1.37417  |
| C | -4.07831 | -0.05441 | 0.77505  |
| C | -4.95641 | 0.59415  | -0.06196 |
| C | -6.32710 | 0.06829  | 0.16579  |

---

|   |          |          |          |
|---|----------|----------|----------|
| H | -6.81271 | -1.83680 | 1.31309  |
| H | -4.29352 | -1.85092 | 2.06258  |
| H | -3.01325 | 0.16002  | 0.86823  |
| H | -4.71568 | 1.42736  | -0.71890 |
| H | -6.82682 | 0.70478  | 0.91851  |
| H | -6.97870 | 0.04859  | -0.71338 |
| O | -2.04409 | 3.97854  | 1.67186  |
| C | -2.07883 | 2.96643  | 2.63939  |
| H | -3.09631 | 2.54235  | 2.73706  |
| H | -1.80631 | 3.40935  | 3.60281  |

M06/lanl2dz-6-31G(d) Energy = -2646.116339

M06/lanl2dz-6-31G(d) Free Energy = -2645.476622

M06/def2-TZVP Derived free energy = -2646.587511

M06/def2-TZVP Derived free energy in solution (toluene) = -2646.618516

M06/def2-TZVP Derived free energy in solution (nitromethane) = -2646.643749

Number of Imaginary Frequencies = 1 (-396.46)

M06/lanl2dz-6-31G(d) Geometry

|   |          |          |          |
|---|----------|----------|----------|
| C | -1.77068 | -2.05866 | -0.45136 |
| C | -2.62339 | -3.20141 | -1.06268 |
| C | 0.08420  | -3.23929 | -1.66179 |
| N | -0.37206 | -2.20269 | -0.87472 |
| C | 0.65543  | -1.34836 | -0.65936 |
| N | 1.66732  | -1.91120 | -1.34591 |
| N | 1.33370  | -3.08328 | -1.97257 |
| C | -3.75760 | -3.41373 | -0.06372 |
| C | -3.18565 | -2.92986 | 1.23800  |
| C | -2.03597 | -2.16611 | 1.02799  |
| C | -1.37691 | -1.56082 | 2.09223  |
| C | -1.88020 | -1.74122 | 3.37922  |
| C | -3.02461 | -2.50916 | 3.59128  |
| C | -3.68568 | -3.10780 | 2.52160  |
| C | 2.98939  | -1.37901 | -1.41771 |
| C | 3.17056  | -0.08558 | -1.98427 |
| C | 4.43888  | 0.54282  | -1.82097 |

---

|    |          |          |          |
|----|----------|----------|----------|
| C  | 5.48881  | -0.16790 | -1.19226 |
| C  | 5.30880  | -1.44240 | -0.72607 |
| C  | 4.03896  | -2.04573 | -0.82371 |
| C  | 2.14116  | 0.62244  | -2.65670 |
| C  | 2.35030  | 1.90652  | -3.09826 |
| C  | 3.59326  | 2.54319  | -2.90055 |
| C  | 4.61669  | 1.86751  | -2.28580 |
| H  | -2.11019 | -1.08399 | -0.83826 |
| H  | -2.96970 | -2.94620 | -2.08082 |
| H  | -4.05571 | -4.46949 | -0.05902 |
| H  | -4.64568 | -2.82667 | -0.34710 |
| H  | -0.47511 | -0.96558 | 1.93850  |
| H  | -1.37094 | -1.28209 | 4.22421  |
| H  | -3.40232 | -2.64524 | 4.60289  |
| H  | -4.57776 | -3.70980 | 2.68992  |
| H  | 6.45750  | 0.31835  | -1.08302 |
| H  | 6.11553  | -1.99066 | -0.24617 |
| Cl | 3.82475  | -3.61111 | -0.10443 |
| H  | 1.17963  | 0.14443  | -2.83769 |
| H  | 1.54845  | 2.43370  | -3.61209 |
| H  | 3.74122  | 3.56254  | -3.24995 |
| H  | 5.58886  | 2.33928  | -2.14600 |
| Au | 0.87672  | 0.66287  | 0.18402  |
| C  | 1.41172  | 2.58497  | 0.67979  |
| C  | 2.53073  | 2.69085  | 1.52424  |
| C  | 0.84130  | 3.71625  | 0.11893  |
| C  | 3.04196  | 3.95192  | 1.82313  |
| C  | 1.36295  | 4.97624  | 0.42644  |
| H  | 0.00624  | 3.64264  | -0.57735 |
| C  | 2.45416  | 5.09035  | 1.27982  |
| H  | 3.90841  | 4.05172  | 2.47666  |
| H  | 0.91483  | 5.86766  | -0.00959 |
| H  | 2.85868  | 6.07243  | 1.51730  |
| C  | 2.39449  | 0.27726  | 1.50073  |
| C  | 2.72960  | -1.00039 | 1.90787  |
| C  | 3.05403  | 1.41375  | 1.99777  |

---

|   |          |          |          |
|---|----------|----------|----------|
| C | 3.78684  | -1.16783 | 2.80743  |
| H | 2.19329  | -1.87499 | 1.54233  |
| C | 4.11051  | 1.22314  | 2.88752  |
| C | 4.47879  | -0.06036 | 3.28133  |
| H | 4.06494  | -2.17258 | 3.12145  |
| H | 4.64470  | 2.08504  | 3.28672  |
| H | 5.30439  | -0.19318 | 3.97784  |
| O | -1.00159 | 1.15752  | -0.97348 |
| C | -3.19956 | 2.00952  | -0.81339 |
| C | -1.89592 | 1.78032  | -0.34203 |
| C | -5.44160 | 2.96126  | -0.29278 |
| C | -4.09112 | 2.71653  | -0.02095 |
| C | -6.09999 | 2.46225  | -1.42323 |
| H | -1.65949 | 2.18569  | 0.66272  |
| H | -3.70159 | 3.10255  | 0.92546  |
| H | -3.45442 | 1.64703  | -1.80915 |
| C | -7.41210 | 3.05705  | -1.84475 |
| H | -5.47031 | 2.13256  | -2.25192 |
| H | -6.01549 | 3.54261  | 0.42965  |
| H | -7.22025 | 3.99183  | -2.38969 |
| H | -7.98229 | 2.40455  | -2.51533 |
| H | -8.04397 | 3.31105  | -0.98445 |
| C | -6.66268 | 0.52752  | -0.90839 |
| C | -5.47233 | -0.16569 | -0.68603 |
| C | -5.11296 | -0.07581 | 0.68538  |
| C | -6.10698 | 0.57733  | 1.35730  |
| C | -7.26845 | 0.78068  | 0.45008  |
| H | -7.27629 | 0.35456  | -1.79135 |
| H | -4.87799 | -0.64518 | -1.46249 |
| H | -4.17416 | -0.42312 | 1.11486  |
| H | -6.11078 | 0.81923  | 2.41608  |
| H | -8.00869 | -0.01643 | 0.64401  |
| H | -7.80208 | 1.72813  | 0.57929  |
| C | -0.83439 | -4.34930 | -2.03467 |
| H | -1.21851 | -4.20198 | -3.06084 |
| H | -0.30520 | -5.30701 | -2.00598 |

---

O -1.88471 -4.40259 -1.10670

M06/lanl2dz-6-31G(d) Energy = -2646.116339

M06/lanl2dz-6-31G(d) Free Energy = -2645.476622

M06/def2-TZVP Derived free energy = -2646.587511

M06/def2-TZVP Derived free energy in solution (toluene) = -2646.618516

M06/def2-TZVP Derived free energy in solution (nitromethane) = -2646.643749

Number of Imaginary Frequencies = 1 (-396.46)

M06/lanl2dz-6-31G(d) Geometry

C -1.77068 -2.05866 -0.45136  
C -2.62339 -3.20141 -1.06268  
C 0.08420 -3.23929 -1.66179  
N -0.37206 -2.20269 -0.87472  
C 0.65543 -1.34836 -0.65936  
N 1.66732 -1.91120 -1.34591  
N 1.33370 -3.08328 -1.97257  
C -3.75760 -3.41373 -0.06372  
C -3.18565 -2.92986 1.23800  
C -2.03597 -2.16611 1.02799  
C -1.37691 -1.56082 2.09223  
C -1.88020 -1.74122 3.37922  
C -3.02461 -2.50915 3.59128  
C -3.68568 -3.10780 2.52160  
C 2.98939 -1.37901 -1.41771  
C 3.17057 -0.08559 -1.98427  
C 4.43888 0.54282 -1.82097  
C 5.48881 -0.16790 -1.19225  
C 5.30880 -1.44240 -0.72607  
C 4.03896 -2.04573 -0.82371  
C 2.14116 0.62244 -2.65670  
C 2.35030 1.90652 -3.09827  
C 3.59326 2.54318 -2.90055  
C 4.61669 1.86751 -2.28580  
H -2.11019 -1.08399 -0.83826  
H -2.96970 -2.94620 -2.08082

---

|    |          |          |          |
|----|----------|----------|----------|
| H  | -4.05571 | -4.46950 | -0.05902 |
| H  | -4.64568 | -2.82668 | -0.34710 |
| H  | -0.47511 | -0.96558 | 1.93850  |
| H  | -1.37094 | -1.28208 | 4.22421  |
| H  | -3.40232 | -2.64524 | 4.60289  |
| H  | -4.57776 | -3.70980 | 2.68992  |
| H  | 6.45750  | 0.31836  | -1.08302 |
| H  | 6.11553  | -1.99066 | -0.24616 |
| Cl | 3.82475  | -3.61111 | -0.10443 |
| H  | 1.17963  | 0.14443  | -2.83769 |
| H  | 1.54844  | 2.43370  | -3.61209 |
| H  | 3.74122  | 3.56254  | -3.24995 |
| H  | 5.58886  | 2.33928  | -2.14600 |
| Au | 0.87672  | 0.66287  | 0.18402  |
| C  | 1.41172  | 2.58497  | 0.67979  |
| C  | 2.53073  | 2.69085  | 1.52423  |
| C  | 0.84130  | 3.71625  | 0.11893  |
| C  | 3.04196  | 3.95192  | 1.82313  |
| C  | 1.36294  | 4.97624  | 0.42644  |
| H  | 0.00623  | 3.64264  | -0.57735 |
| C  | 2.45416  | 5.09036  | 1.27982  |
| H  | 3.90840  | 4.05172  | 2.47666  |
| H  | 0.91482  | 5.86765  | -0.00959 |
| H  | 2.85867  | 6.07244  | 1.51729  |
| C  | 2.39449  | 0.27726  | 1.50073  |
| C  | 2.72960  | -1.00039 | 1.90787  |
| C  | 3.05403  | 1.41375  | 1.99777  |
| C  | 3.78684  | -1.16783 | 2.80743  |
| H  | 2.19329  | -1.87498 | 1.54234  |
| C  | 4.11051  | 1.22314  | 2.88752  |
| C  | 4.47879  | -0.06035 | 3.28133  |
| H  | 4.06494  | -2.17257 | 3.12146  |
| H  | 4.64470  | 2.08505  | 3.28672  |
| H  | 5.30439  | -0.19317 | 3.97784  |
| O  | -1.00158 | 1.15752  | -0.97348 |
| C  | -3.19956 | 2.00951  | -0.81339 |



---

|   |          |          |          |
|---|----------|----------|----------|
| C | -1.89592 | 1.78032  | -0.34203 |
| C | -5.44160 | 2.96126  | -0.29278 |
| C | -4.09112 | 2.71653  | -0.02096 |
| C | -6.09999 | 2.46225  | -1.42324 |
| H | -1.65949 | 2.18570  | 0.66272  |
| H | -3.70159 | 3.10255  | 0.92546  |
| H | -3.45441 | 1.64702  | -1.80915 |
| C | -7.41210 | 3.05704  | -1.84475 |
| H | -5.47031 | 2.13255  | -2.25192 |
| H | -6.01548 | 3.54261  | 0.42964  |
| H | -7.22025 | 3.99182  | -2.38970 |
| H | -7.98229 | 2.40455  | -2.51534 |
| H | -8.04397 | 3.31105  | -0.98445 |
| C | -6.66268 | 0.52751  | -0.90839 |
| C | -5.47233 | -0.16570 | -0.68603 |
| C | -5.11296 | -0.07581 | 0.68539  |
| C | -6.10697 | 0.57734  | 1.35730  |
| C | -7.26845 | 0.78068  | 0.45009  |
| H | -7.27629 | 0.35455  | -1.79134 |
| H | -4.87800 | -0.64518 | -1.46248 |
| H | -4.17416 | -0.42312 | 1.11487  |
| H | -6.11077 | 0.81924  | 2.41608  |
| H | -8.00869 | -0.01642 | 0.64402  |
| H | -7.80208 | 1.72813  | 0.57929  |
| O | -1.88471 | -4.40259 | -1.10669 |
| C | -0.83439 | -4.34930 | -2.03467 |
| H | -1.21851 | -4.20198 | -3.06084 |
| H | -0.30520 | -5.30702 | -2.00598 |

M06/lanl2dz-6-31G(d) Energy = -2646.114794

M06/lanl2dz-6-31G(d) Free Energy = -2645.475957

M06/def2-TZVP Derived free energy = -2646.586401

M06/def2-TZVP Derived free energy in solution (toluene) = -2646.617554

M06/def2-TZVP Derived free energy in solution (nitromethane) = -2646.642845

Number of Imaginary Frequencies = 1 (-378.03)

---

M06/lanl2dz-6-31G(d) Geometry

|    |          |          |          |
|----|----------|----------|----------|
| C  | 1.44934  | 2.20993  | -0.74713 |
| C  | 2.13896  | 3.43940  | -1.38268 |
| C  | -0.62596 | 3.48489  | -1.34067 |
| N  | -0.00635 | 2.36757  | -0.82427 |
| C  | -0.95348 | 1.44123  | -0.54985 |
| N  | -2.09106 | 2.04692  | -0.93733 |
| N  | -1.90933 | 3.31413  | -1.42934 |
| C  | 3.48665  | 3.52292  | -0.67197 |
| C  | 3.21726  | 2.89808  | 0.66949  |
| C  | 2.03961  | 2.14757  | 0.63742  |
| C  | 1.59861  | 1.46180  | 1.76218  |
| C  | 2.34616  | 1.55154  | 2.93635  |
| C  | 3.51687  | 2.30772  | 2.97385  |
| C  | 3.96341  | 2.98170  | 1.83761  |
| C  | -3.38242 | 1.44338  | -0.89021 |
| C  | -3.58840 | 0.23940  | -1.62191 |
| C  | -4.77744 | -0.50275 | -1.36639 |
| C  | -5.74974 | 0.03059  | -0.48675 |
| C  | -5.56583 | 1.23743  | 0.13356  |
| C  | -4.35691 | 1.93782  | -0.05183 |
| C  | -2.64740 | -0.28046 | -2.54783 |
| C  | -2.85110 | -1.50368 | -3.13923 |
| C  | -4.00437 | -2.26144 | -2.84712 |
| C  | -4.95169 | -1.76104 | -1.99058 |
| H  | 1.68732  | 1.30307  | -1.32190 |
| H  | 2.22284  | 3.33789  | -2.47917 |
| H  | 3.82385  | 4.56554  | -0.62211 |
| H  | 4.24627  | 2.96034  | -1.23840 |
| H  | 0.67439  | 0.88115  | 1.74851  |
| H  | 2.00305  | 1.03856  | 3.83281  |
| H  | 4.08239  | 2.38085  | 3.90121  |
| H  | 4.87224  | 3.58240  | 1.87293  |
| H  | -6.66146 | -0.53797 | -0.30748 |
| H  | -6.31377 | 1.65106  | 0.80551  |
| Cl | -4.10026 | 3.38568  | 0.86929  |

---

|    |          |          |          |
|----|----------|----------|----------|
| H  | -1.76074 | 0.29739  | -2.80484 |
| H  | -2.11687 | -1.88697 | -3.84541 |
| H  | -4.14617 | -3.23354 | -3.31423 |
| H  | -5.85881 | -2.32482 | -1.77474 |
| Au | -0.89355 | -0.68225 | -0.00187 |
| C  | -1.19095 | -2.69708 | 0.24419  |
| C  | -2.18126 | -3.04387 | 1.17946  |
| C  | -0.59883 | -3.66056 | -0.55555 |
| C  | -2.54396 | -4.38182 | 1.31927  |
| C  | -0.97058 | -4.99980 | -0.40436 |
| H  | 0.13520  | -3.38652 | -1.31327 |
| C  | -1.93466 | -5.35513 | 0.53232  |
| H  | -3.30992 | -4.67126 | 2.03876  |
| H  | -0.50684 | -5.76307 | -1.02716 |
| H  | -2.22234 | -6.39856 | 0.64668  |
| C  | -2.22919 | -0.65540 | 1.54666  |
| C  | -2.58472 | 0.50225  | 2.21318  |
| C  | -2.73396 | -1.91314 | 1.91852  |
| C  | -3.51361 | 0.42447  | 3.25550  |
| H  | -2.15794 | 1.46702  | 1.94212  |
| C  | -3.67061 | -1.96576 | 2.94950  |
| C  | -4.06317 | -0.80242 | 3.60644  |
| H  | -3.80665 | 1.33339  | 3.77868  |
| H  | -4.08613 | -2.92541 | 3.25630  |
| H  | -4.79267 | -0.86044 | 4.41204  |
| O  | 0.83826  | -0.82736 | -1.44126 |
| C  | 3.17579  | -1.15369 | -1.51872 |
| C  | 1.90297  | -1.30431 | -0.95686 |
| C  | 5.59473  | -1.72570 | -1.33255 |
| C  | 4.26538  | -1.74434 | -0.90134 |
| C  | 6.60153  | -2.50850 | -0.73701 |
| H  | 1.84705  | -1.88192 | -0.01153 |
| H  | 4.06013  | -2.31769 | 0.01123  |
| H  | 3.28336  | -0.60125 | -2.45381 |
| C  | 7.80656  | -2.88595 | -1.55623 |
| H  | 6.24838  | -3.29644 | -0.06760 |

---

|   |          |          |          |
|---|----------|----------|----------|
| H | 5.84407  | -1.13403 | -2.21748 |
| H | 7.51173  | -3.61569 | -2.32239 |
| H | 8.22953  | -2.01815 | -2.07939 |
| H | 8.59768  | -3.34672 | -0.95498 |
| C | 7.48570  | -1.35547 | 0.69517  |
| C | 6.54200  | -1.36705 | 1.72706  |
| C | 5.60603  | -0.32798 | 1.52567  |
| C | 6.01082  | 0.42014  | 0.44866  |
| C | 7.37510  | -0.00212 | 0.03966  |
| H | 8.43877  | -1.87574 | 0.77877  |
| H | 6.47722  | -2.12596 | 2.50321  |
| H | 4.69035  | -0.16799 | 2.09114  |
| H | 5.47408  | 1.27222  | 0.03825  |
| H | 7.58894  | 0.04425  | -1.03296 |
| H | 8.10397  | 0.66531  | 0.53470  |
| C | 0.18442  | 4.67641  | -1.71945 |
| H | 0.31114  | 4.71662  | -2.81679 |
| H | -0.31937 | 5.59601  | -1.40499 |
| O | 1.42696  | 4.61771  | -1.06991 |

M06/lanl2dz-6-31G(d) Energy = -2646.114794

M06/lanl2dz-6-31G(d) Free Energy = -2645.475953

M06/def2-TZVP Derived free energy = -2646.586397

M06/def2-TZVP Derived free energy in solution (toluene) = -2646.617550

M06/def2-TZVP Derived free energy in solution (nitromethane) = -2646.642842

Number of Imaginary Frequencies = 1 (-378.05)

M06/lanl2dz-6-31G(d) Geometry

|   |          |         |          |
|---|----------|---------|----------|
| C | 1.44942  | 2.20989 | -0.74695 |
| C | 2.13909  | 3.43936 | -1.38243 |
| C | -0.62583 | 3.48494 | -1.34049 |
| N | -0.00627 | 2.36757 | -0.82414 |
| C | -0.95343 | 1.44125 | -0.54980 |
| N | -2.09098 | 2.04699 | -0.93727 |
| N | -1.90921 | 3.31422 | -1.42921 |
| C | 3.48675  | 3.52283 | -0.67166 |

---

|    |          |          |          |
|----|----------|----------|----------|
| C  | 3.21730  | 2.89793  | 0.66977  |
| C  | 2.03963  | 2.14745  | 0.63762  |
| C  | 1.59858  | 1.46163  | 1.76233  |
| C  | 2.34608  | 1.55130  | 2.93653  |
| C  | 3.51680  | 2.30747  | 2.97411  |
| C  | 3.96340  | 2.98149  | 1.83792  |
| C  | -3.38236 | 1.44348  | -0.89021 |
| C  | -3.58836 | 0.23954  | -1.62197 |
| C  | -4.77743 | -0.50258 | -1.36652 |
| C  | -5.74974 | 0.03075  | -0.48688 |
| C  | -5.56580 | 1.23754  | 0.13350  |
| C  | -4.35685 | 1.93790  | -0.05181 |
| C  | -2.64734 | -0.28031 | -2.54788 |
| C  | -2.85107 | -1.50350 | -3.13933 |
| C  | -4.00436 | -2.26124 | -2.84729 |
| C  | -4.95170 | -1.76084 | -1.99077 |
| H  | 1.68739  | 1.30305  | -1.32175 |
| H  | 2.22301  | 3.33790  | -2.47892 |
| H  | 3.82398  | 4.56543  | -0.62175 |
| H  | 4.24638  | 2.96024  | -1.23808 |
| H  | 0.67434  | 0.88100  | 1.74859  |
| H  | 2.00293  | 1.03828  | 3.83295  |
| H  | 4.08229  | 2.38055  | 3.90150  |
| H  | 4.87224  | 3.58218  | 1.87330  |
| H  | -6.66148 | -0.53780 | -0.30767 |
| H  | -6.31375 | 1.65116  | 0.80545  |
| Cl | -4.10018 | 3.38570  | 0.86939  |
| H  | -1.76066 | 0.29752  | -2.80485 |
| H  | -2.11681 | -1.88680 | -3.84551 |
| H  | -4.14618 | -3.23332 | -3.31445 |
| H  | -5.85884 | -2.32461 | -1.77498 |
| Au | -0.89357 | -0.68227 | -0.00193 |
| C  | -1.19107 | -2.69709 | 0.24402  |
| C  | -2.18139 | -3.04388 | 1.17929  |
| C  | -0.59901 | -3.66056 | -0.55577 |
| C  | -2.54416 | -4.38182 | 1.31902  |

---

|   |          |          |          |
|---|----------|----------|----------|
| C | -0.97083 | -4.99978 | -0.40466 |
| H | 0.13504  | -3.38651 | -1.31347 |
| C | -1.93492 | -5.35512 | 0.53201  |
| H | -3.31014 | -4.67125 | 2.03850  |
| H | -0.50713 | -5.76305 | -1.02750 |
| H | -2.22265 | -6.39853 | 0.64631  |
| C | -2.22921 | -0.65543 | 1.54660  |
| C | -2.58469 | 0.50221  | 2.21317  |
| C | -2.73404 | -1.91317 | 1.91840  |
| C | -3.51358 | 0.42442  | 3.25549  |
| H | -2.15788 | 1.46698  | 1.94215  |
| C | -3.67068 | -1.96579 | 2.94938  |
| C | -4.06320 | -0.80246 | 3.60638  |
| H | -3.80660 | 1.33333  | 3.77870  |
| H | -4.08624 | -2.92543 | 3.25615  |
| H | -4.79269 | -0.86049 | 4.41197  |
| O | 0.83823  | -0.82734 | -1.44134 |
| C | 3.17578  | -1.15357 | -1.51876 |
| C | 1.90294  | -1.30430 | -0.95695 |
| C | 5.59473  | -1.72555 | -1.33260 |
| C | 4.26537  | -1.74426 | -0.90142 |
| C | 6.60150  | -2.50845 | -0.73716 |
| H | 1.84701  | -1.88202 | -0.01170 |
| H | 4.06011  | -2.31769 | 0.01109  |
| H | 3.28336  | -0.60103 | -2.45379 |
| C | 7.80654  | -2.88580 | -1.55641 |
| H | 6.24834  | -3.29647 | -0.06785 |
| H | 5.84408  | -1.13379 | -2.21747 |
| H | 7.51169  | -3.61533 | -2.32276 |
| H | 8.22962  | -2.01791 | -2.07933 |
| H | 8.59759  | -3.34678 | -0.95523 |
| C | 7.48569  | -1.35562 | 0.69521  |
| C | 6.54196  | -1.36729 | 1.72706  |
| C | 5.60605  | -0.32814 | 1.52578  |
| C | 6.01091  | 0.42010  | 0.44889  |
| C | 7.37518  | -0.00219 | 0.03986  |

---

|   |          |          |          |
|---|----------|----------|----------|
| H | 8.43873  | -1.87596 | 0.77875  |
| H | 6.47712  | -2.12630 | 2.50312  |
| H | 4.69036  | -0.16818 | 2.09125  |
| H | 5.47425  | 1.27228  | 0.03860  |
| H | 7.58904  | 0.04431  | -1.03275 |
| H | 8.10407  | 0.66514  | 0.53500  |
| C | 0.18459  | 4.67645  | -1.71921 |
| H | 0.31134  | 4.71669  | -2.81654 |
| H | -0.31917 | 5.59605  | -1.40473 |
| O | 1.42711  | 4.61768  | -1.06963 |

M06/lanl2dz-6-31G(d) Energy = -2646.114794

M06/lanl2dz-6-31G(d) Free Energy = -2645.475952

M06/def2-TZVP Derived free energy = -2646.586396

M06/def2-TZVP Derived free energy in solution (toluene) = -2646.617549

M06/def2-TZVP Derived free energy in solution (nitromethane) = -2646.642841

Number of Imaginary Frequencies = 1 (-378.05)

M06/lanl2dz-6-31G(d) Geometry

|   |          |          |          |
|---|----------|----------|----------|
| C | 1.44944  | 2.20990  | -0.74686 |
| C | 2.13913  | 3.43939  | -1.38230 |
| C | -0.62580 | 3.48499  | -1.34036 |
| N | -0.00624 | 2.36760  | -0.82405 |
| C | -0.95341 | 1.44127  | -0.54974 |
| N | -2.09096 | 2.04703  | -0.93720 |
| N | -1.90918 | 3.31428  | -1.42909 |
| C | 3.48678  | 3.52283  | -0.67152 |
| C | 3.21732  | 2.89790  | 0.66988  |
| C | 2.03965  | 2.14741  | 0.63770  |
| C | 1.59859  | 1.46156  | 1.76239  |
| C | 2.34608  | 1.55120  | 2.93660  |
| C | 3.51681  | 2.30736  | 2.97422  |
| C | 3.96341  | 2.98142  | 1.83805  |
| C | -3.38234 | 1.44352  | -0.89016 |
| C | -3.58834 | 0.23962  | -1.62199 |
| C | -4.77741 | -0.50250 | -1.36659 |

---

|    |          |          |          |
|----|----------|----------|----------|
| C  | -5.74974 | 0.03079  | -0.48693 |
| C  | -5.56579 | 1.23756  | 0.13351  |
| C  | -4.35683 | 1.93791  | -0.05176 |
| C  | -2.64731 | -0.28020 | -2.54790 |
| C  | -2.85103 | -1.50336 | -3.13940 |
| C  | -4.00434 | -2.26111 | -2.84741 |
| C  | -4.95169 | -1.76074 | -1.99088 |
| H  | 1.68741  | 1.30307  | -1.32169 |
| H  | 2.22305  | 3.33796  | -2.47879 |
| H  | 3.82402  | 4.56543  | -0.62158 |
| H  | 4.24641  | 2.96025  | -1.23796 |
| H  | 0.67436  | 0.88093  | 1.74863  |
| H  | 2.00293  | 1.03815  | 3.83300  |
| H  | 4.08229  | 2.38041  | 3.90161  |
| H  | 4.87225  | 3.58210  | 1.87345  |
| H  | -6.66149 | -0.53775 | -0.30776 |
| H  | -6.31374 | 1.65115  | 0.80547  |
| Cl | -4.10016 | 3.38566  | 0.86952  |
| H  | -1.76062 | 0.29764  | -2.80484 |
| H  | -2.11677 | -1.88664 | -3.84558 |
| H  | -4.14616 | -3.23317 | -3.31461 |
| H  | -5.85884 | -2.32450 | -1.77514 |
| Au | -0.89358 | -0.68226 | -0.00195 |
| C  | -1.19110 | -2.69710 | 0.24390  |
| C  | -2.18144 | -3.04390 | 1.17915  |
| C  | -0.59907 | -3.66053 | -0.55594 |
| C  | -2.54425 | -4.38185 | 1.31880  |
| C  | -0.97092 | -4.99976 | -0.40490 |
| H  | 0.13499  | -3.38646 | -1.31363 |
| C  | -1.93503 | -5.35511 | 0.53174  |
| H  | -3.31024 | -4.67130 | 2.03826  |
| H  | -0.50724 | -5.76300 | -1.02779 |
| H  | -2.22280 | -6.39853 | 0.64598  |
| C  | -2.22922 | -0.65547 | 1.54657  |
| C  | -2.58468 | 0.50214  | 2.21319  |
| C  | -2.73406 | -1.91322 | 1.91832  |



---

|   |          |          |          |
|---|----------|----------|----------|
| C | -3.51357 | 0.42433  | 3.25551  |
| H | -2.15786 | 1.46691  | 1.94221  |
| C | -3.67070 | -1.96588 | 2.94930  |
| C | -4.06320 | -0.80257 | 3.60635  |
| H | -3.80657 | 1.33321  | 3.77875  |
| H | -4.08629 | -2.92552 | 3.25602  |
| H | -4.79270 | -0.86062 | 4.41193  |
| O | 0.83823  | -0.82730 | -1.44137 |
| C | 3.17578  | -1.15353 | -1.51878 |
| C | 1.90293  | -1.30427 | -0.95699 |
| C | 5.59472  | -1.72553 | -1.33262 |
| C | 4.26536  | -1.74424 | -0.90144 |
| C | 6.60149  | -2.50846 | -0.73720 |
| H | 1.84699  | -1.88203 | -0.01175 |
| H | 4.06009  | -2.31770 | 0.01105  |
| H | 3.28336  | -0.60097 | -2.45379 |
| C | 7.80652  | -2.88579 | -1.55646 |
| H | 6.24832  | -3.29649 | -0.06792 |
| H | 5.84408  | -1.13374 | -2.21747 |
| H | 7.51168  | -3.61528 | -2.32283 |
| H | 8.22962  | -2.01788 | -2.07934 |
| H | 8.59757  | -3.34680 | -0.95529 |
| C | 7.48568  | -1.35569 | 0.69521  |
| C | 6.54194  | -1.36739 | 1.72706  |
| C | 5.60604  | -0.32821 | 1.52581  |
| C | 6.01092  | 0.42006  | 0.44896  |
| C | 7.37518  | -0.00223 | 0.03991  |
| H | 8.43871  | -1.87604 | 0.77874  |
| H | 6.47708  | -2.12641 | 2.50309  |
| H | 4.69035  | -0.16826 | 2.09129  |
| H | 5.47427  | 1.27227  | 0.03870  |
| H | 7.58905  | 0.04431  | -1.03269 |
| H | 8.10408  | 0.66508  | 0.53508  |
| C | 0.18463  | 4.67650  | -1.71904 |
| H | 0.31139  | 4.71678  | -2.81638 |
| H | -0.31913 | 5.59610  | -1.40454 |

---

O 1.42715 4.61771 -1.06947

M06/lanl2dz-6-31G(d) Energy = -2646.121134

M06/lanl2dz-6-31G(d) Free Energy = -2645.481881

M06/def2-TZVP Derived free energy = -2646.592781

M06/def2-TZVP Derived free energy in solution (toluene) = -2646.624417

M06/def2-TZVP Derived free energy in solution (nitromethane) = -2646.650233

Number of Imaginary Frequencies = 1 (-396.08)

M06/lanl2dz-6-31G(d) Geometry

C -1.76812 -2.06333 -0.44733  
C -2.62711 -3.18107 -1.08317  
C -1.81105 -4.45195 -1.22217  
O -0.65797 -4.24881 -2.04811  
C 0.10180 -3.24518 -1.65915  
N -0.36163 -2.22741 -0.84490  
C 0.66574 -1.35928 -0.64971  
N 1.66415 -1.90207 -1.36203  
N 1.34351 -3.07626 -1.99860  
C -3.77107 -3.41656 -0.08073  
C -3.20641 -2.93631 1.22670  
C -2.05172 -2.17778 1.02848  
C -1.39640 -1.58080 2.10062  
C -1.91048 -1.76397 3.38251  
C -3.06114 -2.52659 3.58307  
C -3.71714 -3.11794 2.50655  
C 2.97890 -1.35474 -1.44605  
C 3.13893 -0.05715 -2.00879  
C 4.40032 0.58754 -1.85346  
C 5.46403 -0.11148 -1.23480  
C 5.30405 -1.38983 -0.77182  
C 4.04186 -2.01003 -0.86337  
C 2.09426 0.63894 -2.66994  
C 2.28332 1.92612 -3.11129  
C 3.52000 2.57819 -2.92307  
C 4.55685 1.91531 -2.31695

---

|    |          |          |          |
|----|----------|----------|----------|
| H  | -2.07344 | -1.07435 | -0.82403 |
| H  | -2.98433 | -2.88697 | -2.07900 |
| H  | -2.38141 | -5.24241 | -1.71718 |
| H  | -1.48279 | -4.81759 | -0.23543 |
| H  | -4.08656 | -4.47022 | -0.05580 |
| H  | -4.66558 | -2.83633 | -0.35665 |
| H  | -0.49000 | -0.99044 | 1.95450  |
| H  | -1.40534 | -1.31154 | 4.23352  |
| H  | -3.44715 | -2.66411 | 4.59131  |
| H  | -4.61440 | -3.71490 | 2.66592  |
| H  | 6.42713  | 0.38695  | -1.13103 |
| H  | 6.12123  | -1.92932 | -0.29957 |
| Cl | 3.85357  | -3.58131 | -0.15046 |
| H  | 1.13841  | 0.14724  | -2.84375 |
| H  | 1.47130  | 2.44347  | -3.61910 |
| H  | 3.65238  | 3.59961  | -3.27280 |
| H  | 5.52395  | 2.39945  | -2.18429 |
| Au | 0.88126  | 0.64869  | 0.20122  |
| C  | 1.40844  | 2.57064  | 0.70930  |
| C  | 2.52771  | 2.67531  | 1.55362  |
| C  | 0.83206  | 3.70438  | 0.15933  |
| C  | 3.03172  | 3.93634  | 1.86477  |
| C  | 1.34657  | 4.96441  | 0.47856  |
| H  | -0.00270 | 3.63336  | -0.53755 |
| C  | 2.43726  | 5.07665  | 1.33276  |
| H  | 3.89786  | 4.03485  | 2.51889  |
| H  | 0.89358  | 5.85731  | 0.05067  |
| H  | 2.83610  | 6.05868  | 1.57984  |
| C  | 2.40429  | 0.26094  | 1.51076  |
| C  | 2.75041  | -1.01815 | 1.90376  |
| C  | 3.05918  | 1.39706  | 2.01485  |
| C  | 3.81381  | -1.18734 | 2.79555  |
| H  | 2.21886  | -1.89227 | 1.53088  |
| C  | 4.12055  | 1.20493  | 2.89849  |
| C  | 4.49965  | -0.07976 | 3.27797  |
| H  | 4.10155  | -2.19342 | 3.09638  |

---

|   |          |          |          |
|---|----------|----------|----------|
| H | 4.65133  | 2.06650  | 3.30293  |
| H | 5.32996  | -0.21357 | 3.96866  |
| O | -0.99929 | 1.14895  | -0.95283 |
| C | -3.19345 | 2.01064  | -0.80817 |
| C | -1.89289 | 1.77849  | -0.32829 |
| C | -5.43741 | 2.96465  | -0.30616 |
| C | -4.08843 | 2.72216  | -0.02431 |
| C | -6.08677 | 2.45910  | -1.43920 |
| H | -1.65963 | 2.18667  | 0.67612  |
| H | -3.70468 | 3.11183  | 0.92295  |
| H | -3.44236 | 1.64548  | -1.80439 |
| C | -7.39730 | 3.04916  | -1.87246 |
| H | -5.45005 | 2.12932  | -2.26251 |
| H | -6.01717 | 3.54871  | 0.40935  |
| H | -7.20380 | 3.98231  | -2.41955 |
| H | -7.96077 | 2.39265  | -2.54482 |
| H | -8.03632 | 3.30482  | -1.01793 |
| C | -6.64466 | 0.52707  | -0.92319 |
| C | -5.45492 | -0.16303 | -0.68618 |
| C | -5.11041 | -0.06736 | 0.68863  |
| C | -6.11264 | 0.58597  | 1.34807  |
| C | -7.26549 | 0.78238  | 0.42832  |
| H | -7.24910 | 0.34822  | -1.81136 |
| H | -4.85043 | -0.64240 | -1.45471 |
| H | -4.17432 | -0.40907 | 1.12812  |
| H | -6.12758 | 0.83260  | 2.40566  |
| H | -8.00563 | -0.01604 | 0.61718  |
| H | -7.80297 | 1.72882  | 0.54861  |

Bottom, toward, 2, exo, away

M06/lanl2dz-6-31G(d) Energy = -2646.112490

M06/lanl2dz-6-31G(d) Free Energy = -2645.475892

M06/def2-TZVP Derived free energy = -2646.586364

M06/def2-TZVP Derived free energy in solution (toluene) = -2646.617082

M06/def2-TZVP Derived free energy in solution (nitromethane) = -2646.641563

---

Number of Imaginary Frequencies = 1 (-367.78)

M06/lanl2dz-6-31G(d) Geometry

|   |          |          |          |
|---|----------|----------|----------|
| C | -0.01775 | 3.13430  | -0.21348 |
| C | -0.20122 | 4.62340  | -0.57400 |
| C | -1.77181 | 2.88147  | -2.01282 |
| N | -1.03459 | 2.36787  | -0.96865 |
| C | -1.39412 | 1.07831  | -0.78787 |
| N | -2.33771 | 0.88837  | -1.72374 |
| N | -2.58439 | 1.99199  | -2.49887 |
| C | -1.26703 | 5.13909  | 0.41112  |
| C | -1.03179 | 4.26664  | 1.61057  |
| C | -0.29424 | 3.13087  | 1.26188  |
| C | 0.08564  | 2.20092  | 2.22179  |
| C | -0.31808 | 2.39466  | 3.53995  |
| C | -1.07170 | 3.51547  | 3.88631  |
| C | -1.42330 | 4.46434  | 2.92842  |
| C | -3.06893 | -0.32110 | -1.91173 |
| C | -2.37889 | -1.48004 | -2.36096 |
| C | -3.09065 | -2.71436 | -2.38694 |
| C | -4.46071 | -2.73198 | -2.03255 |
| C | -5.11299 | -1.59156 | -1.64544 |
| C | -4.40207 | -0.37758 | -1.56955 |
| C | -1.01637 | -1.46622 | -2.75073 |
| C | -0.38208 | -2.63327 | -3.09932 |
| C | -1.07737 | -3.86087 | -3.09943 |
| C | -2.40674 | -3.89497 | -2.76248 |
| H | 0.96264  | 2.73682  | -0.50443 |
| H | 0.74986  | 5.12508  | -0.35528 |
| H | -2.28524 | 4.99818  | 0.01501  |
| H | -1.15471 | 6.21113  | 0.61242  |
| H | 0.69415  | 1.33503  | 1.95584  |
| H | -0.03809 | 1.67162  | 4.30332  |
| H | -1.37664 | 3.65853  | 4.92124  |
| H | -1.99226 | 5.34915  | 3.21111  |
| H | -4.99796 | -3.67899 | -2.06830 |

---

|    |          |          |          |
|----|----------|----------|----------|
| H  | -6.16460 | -1.60324 | -1.37109 |
| Cl | -5.23512 | 1.02597  | -0.97561 |
| H  | -0.46680 | -0.52757 | -2.77847 |
| H  | 0.66678  | -2.60544 | -3.38916 |
| H  | -0.55967 | -4.77605 | -3.37851 |
| H  | -2.96003 | -4.83348 | -2.77467 |
| Au | -0.50448 | -0.56349 | 0.31798  |
| C  | 0.19862  | -2.29667 | 1.16630  |
| C  | -0.65303 | -2.88038 | 2.12141  |
| C  | 1.36713  | -2.93485 | 0.78205  |
| C  | -0.28544 | -4.08507 | 2.71666  |
| C  | 1.72372  | -4.14643 | 1.38170  |
| H  | 2.00091  | -2.51548 | -0.00006 |
| C  | 0.90363  | -4.71059 | 2.35176  |
| H  | -0.93154 | -4.54929 | 3.46153  |
| H  | 2.64016  | -4.65249 | 1.08113  |
| H  | 1.18244  | -5.65292 | 2.81972  |
| C  | -2.04514 | -0.97381 | 1.59122  |
| C  | -3.14106 | -0.14222 | 1.72729  |
| C  | -1.88577 | -2.13533 | 2.36521  |
| C  | -4.14177 | -0.49175 | 2.63812  |
| H  | -3.23070 | 0.77486  | 1.14649  |
| C  | -2.89505 | -2.46205 | 3.27016  |
| C  | -4.01722 | -1.64820 | 3.39896  |
| H  | -5.01545 | 0.14906  | 2.74475  |
| H  | -2.80669 | -3.35888 | 3.88294  |
| H  | -4.79872 | -1.91844 | 4.10656  |
| O  | 1.33627  | -0.01037 | -0.86926 |
| C  | 3.61984  | 0.57310  | -0.93210 |
| C  | 2.46314  | 0.08029  | -0.31352 |
| C  | 6.03836  | 1.10207  | -0.70285 |
| C  | 4.81203  | 0.62272  | -0.23070 |
| C  | 7.16617  | 1.28734  | 0.11937  |
| H  | 2.57215  | -0.25298 | 0.73984  |
| H  | 4.79020  | 0.28132  | 0.81179  |
| H  | 3.55951  | 0.90917  | -1.96799 |

---

|   |          |          |          |
|---|----------|----------|----------|
| C | 8.18235  | 2.32819  | -0.27138 |
| H | 6.97704  | 1.22555  | 1.19393  |
| H | 6.09429  | 1.42466  | -1.74605 |
| H | 8.47475  | 2.23151  | -1.32534 |
| H | 7.74758  | 3.32888  | -0.14466 |
| H | 9.08773  | 2.28513  | 0.34360  |
| C | 8.30855  | -0.38723 | -0.04138 |
| C | 7.62728  | -1.30363 | 0.76609  |
| C | 6.63328  | -1.95636 | 0.00461  |
| C | 6.75164  | -1.55943 | -1.30431 |
| C | 8.00483  | -0.77714 | -1.46562 |
| H | 9.27521  | 0.02375  | 0.24595  |
| H | 7.77071  | -1.41771 | 1.83789  |
| H | 5.87438  | -2.62552 | 0.40039  |
| H | 6.10968  | -1.86526 | -2.12581 |
| H | 8.79966  | -1.47148 | -1.79420 |
| H | 7.97114  | 0.03112  | -2.20284 |
| C | -1.61594 | 4.29866  | -2.44676 |
| H | -1.56007 | 4.35179  | -3.53941 |
| H | -2.50128 | 4.88120  | -2.13919 |
| O | -0.42635 | 4.84860  | -1.94276 |

Top, away, 1, exo, away

M06/lanl2dz-6-31G(d) Energy = -2646.114670

M06/lanl2dz-6-31G(d) Free Energy = -2645.478465

M06/def2-TZVP Derived free energy = -2646.588691

M06/def2-TZVP Derived free energy in solution (toluene) = -2646.619770

M06/def2-TZVP Derived free energy in solution (nitromethane) = -2646.644595

Number of Imaginary Frequencies = 1 (-396.76)

M06/lanl2dz-6-31G(d) Geometry

|   |          |          |         |
|---|----------|----------|---------|
| C | 0.42718  | -0.10795 | 3.59688 |
| C | -0.91823 | 0.13906  | 4.33802 |
| C | 0.29850  | 2.24095  | 2.91908 |
| N | 0.57339  | 0.93923  | 2.56597 |

---

|    |          |          |          |
|----|----------|----------|----------|
| C  | 1.01326  | 0.91839  | 1.28854  |
| N  | 1.00405  | 2.22155  | 0.95177  |
| N  | 0.54612  | 3.05960  | 1.94382  |
| C  | -1.92768 | -0.75034 | 3.60635  |
| C  | -1.07750 | -1.86932 | 3.08268  |
| C  | 0.26782  | -1.49815 | 3.06969  |
| C  | 1.25641  | -2.36104 | 2.60920  |
| C  | 0.87348  | -3.61214 | 2.13144  |
| C  | -0.47151 | -3.98416 | 2.13463  |
| C  | -1.45391 | -3.12209 | 2.61743  |
| C  | 1.43883  | 2.77626  | -0.28846 |
| C  | 0.57813  | 2.71876  | -1.41683 |
| C  | 1.05650  | 3.23332  | -2.65691 |
| C  | 2.34794  | 3.80924  | -2.71492 |
| C  | 3.14318  | 3.88834  | -1.60277 |
| C  | 2.68035  | 3.36714  | -0.37816 |
| C  | -0.73076 | 2.18200  | -1.35837 |
| C  | -1.51333 | 2.13756  | -2.48699 |
| C  | -1.03435 | 2.62636  | -3.72065 |
| C  | 0.22354  | 3.16691  | -3.79897 |
| H  | 1.29128  | 0.00404  | 4.26731  |
| H  | -0.77771 | -0.21734 | 5.37295  |
| H  | -2.36143 | -0.17078 | 2.77436  |
| H  | -2.75210 | -1.07194 | 4.25401  |
| H  | 2.30727  | -2.06659 | 2.61822  |
| H  | 1.62615  | -4.30253 | 1.75595  |
| H  | -0.75351 | -4.96917 | 1.76684  |
| H  | -2.49949 | -3.42844 | 2.62944  |
| H  | 2.70502  | 4.20152  | -3.66638 |
| H  | 4.13059  | 4.34086  | -1.64284 |
| Cl | 3.71711  | 3.48553  | 1.00987  |
| H  | -1.11275 | 1.80900  | -0.40841 |
| H  | -2.51941 | 1.71974  | -2.42487 |
| H  | -1.66653 | 2.58171  | -4.60490 |
| H  | 0.60303  | 3.55803  | -4.74237 |
| Au | 1.17051  | -0.78465 | -0.06244 |



---

|   |          |          |          |
|---|----------|----------|----------|
| C | 1.29666  | -2.36443 | -1.37439 |
| C | 2.57627  | -2.58990 | -1.91178 |
| C | 0.23601  | -3.18965 | -1.71234 |
| C | 2.75867  | -3.62080 | -2.83143 |
| C | 0.43155  | -4.22429 | -2.63206 |
| H | -0.74650 | -3.06036 | -1.25791 |
| C | 1.68526  | -4.42845 | -3.19591 |
| H | 3.74260  | -3.80641 | -3.26172 |
| H | -0.40096 | -4.87219 | -2.90194 |
| H | 1.83408  | -5.23111 | -3.91572 |
| C | 3.18221  | -0.80241 | -0.39936 |
| C | 4.06279  | 0.03205  | 0.26360  |
| C | 3.61648  | -1.71803 | -1.37372 |
| C | 5.41920  | -0.01041 | -0.07149 |
| H | 3.71805  | 0.72129  | 1.03199  |
| C | 4.97357  | -1.74462 | -1.69108 |
| C | 5.86642  | -0.89054 | -1.04935 |
| H | 6.11775  | 0.65194  | 0.43738  |
| H | 5.34167  | -2.44438 | -2.44099 |
| H | 6.92231  | -0.92089 | -1.31102 |
| O | -1.07038 | -0.80634 | 0.18300  |
| C | -3.25909 | -0.91521 | -0.66775 |
| C | -1.85981 | -0.82686 | -0.79236 |
| C | -5.45160 | -0.93642 | -1.85945 |
| C | -4.05370 | -0.87252 | -1.80009 |
| C | -6.27184 | -1.10327 | -0.73736 |
| H | -1.45059 | -0.77352 | -1.82091 |
| H | -3.52911 | -0.77016 | -2.75553 |
| H | -3.66921 | -1.04198 | 0.33469  |
| C | -7.67400 | -1.61121 | -0.91511 |
| H | -5.78523 | -1.44618 | 0.17786  |
| H | -5.92452 | -0.87004 | -2.84008 |
| H | -8.30211 | -1.44764 | -0.03259 |
| H | -8.16879 | -1.15873 | -1.78366 |
| H | -7.64074 | -2.69516 | -1.09231 |
| C | -6.63938 | 0.80987  | -0.00780 |

---

|   |          |         |          |
|---|----------|---------|----------|
| C | -5.40474 | 1.28640 | 0.43021  |
| C | -4.76670 | 1.99547 | -0.62072 |
| C | -5.61155 | 2.05547 | -1.69221 |
| C | -6.94646 | 1.53200 | -1.29567 |
| H | -7.42218 | 0.51169 | 0.68783  |
| H | -4.97488 | 1.10883 | 1.41352  |
| H | -3.75824 | 2.39955 | -0.57983 |
| H | -5.40045 | 2.52333 | -2.65003 |
| H | -7.59551 | 2.39251 | -1.05186 |
| H | -7.47420 | 0.95974 | -2.06575 |
| C | -0.35193 | 2.45250 | 4.23975  |
| H | 0.38016  | 2.37745 | 5.06325  |
| H | -0.82322 | 3.43788 | 4.28948  |
| O | -1.36582 | 1.47812 | 4.35102  |

M06/lanl2dz-6-31G(d) Energy = -2646.117592

M06/lanl2dz-6-31G(d) Free Energy = -2645.476165

M06/def2-TZVP Derived free energy = -2646.582986

M06/def2-TZVP Derived free energy in solution (toluene) = -2646.614254

M06/def2-TZVP Derived free energy in solution (nitromethane) = -2646.638935

Number of Imaginary Frequencies = 1 (-363.85)

M06/lanl2dz-6-31G(d) Geometry

|   |          |          |          |
|---|----------|----------|----------|
| C | 0.76564  | -0.81418 | -3.04762 |
| C | 2.29101  | -0.97328 | -3.30620 |
| C | 1.25856  | 1.54405  | -2.61530 |
| N | 0.57463  | 0.41000  | -2.24164 |
| C | -0.22151 | 0.70729  | -1.18745 |
| N | 0.02176  | 2.01810  | -0.99772 |
| N | 0.95169  | 2.55377  | -1.86117 |
| C | 2.77741  | -1.85571 | -2.15513 |
| C | 1.56928  | -2.67618 | -1.81726 |
| C | 0.41813  | -2.08620 | -2.34171 |
| C | -0.83462 | -2.66685 | -2.17804 |
| C | -0.92558 | -3.84696 | -1.44282 |
| C | 0.21986  | -4.42674 | -0.89720 |

---

|    |          |          |          |
|----|----------|----------|----------|
| C  | 1.47563  | -3.85249 | -1.08684 |
| C  | -0.63153 | 2.88015  | -0.06703 |
| C  | -0.21646 | 2.88963  | 1.29073  |
| C  | -0.90804 | 3.74540  | 2.19753  |
| C  | -1.95893 | 4.56190  | 1.71638  |
| C  | -2.31159 | 4.56485  | 0.39312  |
| C  | -1.63281 | 3.71951  | -0.50643 |
| C  | 0.86041  | 2.10786  | 1.77346  |
| C  | 1.22242  | 2.16999  | 3.09783  |
| C  | 0.53002  | 3.00404  | 4.00120  |
| C  | -0.51423 | 3.77350  | 3.55618  |
| H  | 0.20071  | -0.66070 | -3.97801 |
| H  | 2.39774  | -1.49913 | -4.26952 |
| H  | 3.04961  | -1.18804 | -1.32002 |
| H  | 3.66817  | -2.44261 | -2.41422 |
| H  | -1.72634 | -2.21028 | -2.61037 |
| H  | -1.89613 | -4.31531 | -1.29135 |
| H  | 0.13161  | -5.34996 | -0.32737 |
| H  | 2.36679  | -4.32249 | -0.67170 |
| H  | -2.48203 | 5.20953  | 2.41882  |
| H  | -3.10438 | 5.20633  | 0.01726  |
| Cl | -2.07495 | 3.78373  | -2.18470 |
| H  | 1.40096  | 1.45144  | 1.09077  |
| H  | 2.05076  | 1.55633  | 3.45251  |
| H  | 0.82812  | 3.03547  | 5.04683  |
| H  | -1.05588 | 4.42602  | 4.24002  |
| Au | -1.34379 | -0.65270 | 0.11235  |
| C  | -2.40749 | -1.93405 | 1.31386  |
| C  | -3.80556 | -1.82007 | 1.22005  |
| C  | -1.82904 | -2.88499 | 2.13793  |
| C  | -4.60886 | -2.63887 | 2.01131  |
| C  | -2.64518 | -3.70371 | 2.92393  |
| H  | -0.74813 | -3.01942 | 2.16548  |
| C  | -4.02759 | -3.56977 | 2.86757  |
| H  | -5.69454 | -2.56173 | 1.95519  |
| H  | -2.19498 | -4.44852 | 3.57820  |

---

|   |          |          |          |
|---|----------|----------|----------|
| H | -4.66110 | -4.20482 | 3.48403  |
| C | -3.24133 | -0.21900 | -0.50145 |
| C | -3.51830 | 0.64997  | -1.54077 |
| C | -4.26419 | -0.86355 | 0.21647  |
| C | -4.85047 | 0.92422  | -1.86241 |
| H | -2.72040 | 1.13272  | -2.10154 |
| C | -5.58620 | -0.57905 | -0.12221 |
| C | -5.87580 | 0.31484  | -1.14974 |
| H | -5.07472 | 1.61944  | -2.67003 |
| H | -6.40116 | -1.06428 | 0.41430  |
| H | -6.91322 | 0.52984  | -1.39878 |
| O | 0.68989  | -1.16063 | 0.89340  |
| C | 2.33376  | -1.10464 | 2.57942  |
| C | 1.00667  | -1.09403 | 2.11434  |
| C | 4.75343  | -1.07289 | 1.96075  |
| C | 3.38835  | -1.16992 | 1.68444  |
| C | 5.74983  | -1.30886 | 0.99127  |
| H | 0.20520  | -0.99980 | 2.86957  |
| H | 3.10841  | -1.33566 | 0.64002  |
| H | 2.50827  | -1.01678 | 3.65155  |
| C | 7.12264  | -1.71864 | 1.45729  |
| H | 5.40854  | -1.82966 | 0.09250  |
| H | 5.06407  | -0.84838 | 2.98522  |
| H | 7.85214  | -1.74877 | 0.64080  |
| H | 7.50307  | -1.04387 | 2.23556  |
| H | 7.07610  | -2.72523 | 1.89402  |
| C | 6.17583  | 0.45586  | 0.11233  |
| C | 5.11877  | 0.64094  | -0.78835 |
| C | 4.05796  | 1.30852  | -0.13736 |
| C | 4.46681  | 1.66624  | 1.12357  |
| C | 5.92568  | 1.41282  | 1.25227  |
| H | 7.18569  | 0.23710  | -0.23258 |
| H | 5.06928  | 0.25149  | -1.80394 |
| H | 3.06892  | 1.48378  | -0.56088 |
| H | 3.85819  | 2.17525  | 1.86798  |
| H | 6.45650  | 2.35308  | 1.01537  |

---

|   |         |         |          |
|---|---------|---------|----------|
| H | 6.26938 | 1.10082 | 2.24360  |
| O | 3.03829 | 0.22926 | -3.33814 |
| C | 2.30419 | 1.39211 | -3.66038 |
| H | 2.99397 | 2.24114 | -3.64394 |
| H | 1.86022 | 1.32501 | -4.66868 |

M06/lanl2dz-6-31G(d) Energy = -2646.112179

M06/lanl2dz-6-31G(d) Free Energy = -2645.473170

M06/def2-TZVP Derived free energy = -2646.584842

M06/def2-TZVP Derived free energy in solution (toluene) = -2646.616055

M06/def2-TZVP Derived free energy in solution (nitromethane) = -2646.641192

Number of Imaginary Frequencies = 1 (-399.43)

M06/lanl2dz-6-31G(d) Geometry

|   |          |          |          |
|---|----------|----------|----------|
| C | 2.73491  | -1.92998 | -1.12676 |
| C | 4.01812  | -2.82345 | -1.05562 |
| C | 2.07344  | -2.92524 | 1.03611  |
| N | 2.09850  | -1.84829 | 0.18520  |
| C | 1.32172  | -0.86942 | 0.69312  |
| N | 0.86280  | -1.41199 | 1.83074  |
| N | 1.32531  | -2.68914 | 2.07127  |
| C | 3.93409  | -3.75098 | -2.28421 |
| C | 2.51633  | -3.64807 | -2.76701 |
| C | 1.83756  | -2.61988 | -2.11838 |
| C | 0.50392  | -2.33671 | -2.39322 |
| C | -0.14830 | -3.10615 | -3.35172 |
| C | 0.52696  | -4.13349 | -4.01334 |
| C | 1.86000  | -4.41208 | -3.72673 |
| C | -0.05714 | -0.81603 | 2.73906  |
| C | -1.39722 | -1.29128 | 2.74787  |
| C | -2.31326 | -0.70638 | 3.66917  |
| C | -1.86823 | 0.33648  | 4.51824  |
| C | -0.57322 | 0.78036  | 4.48480  |
| C | 0.34699  | 0.18590  | 3.59501  |
| C | -1.85417 | -2.31156 | 1.87757  |
| C | -3.15015 | -2.75868 | 1.95719  |

---

|    |          |          |          |
|----|----------|----------|----------|
| C  | -4.05183 | -2.20243 | 2.89052  |
| C  | -3.64412 | -1.18549 | 3.71683  |
| H  | 2.98448  | -0.90148 | -1.42357 |
| H  | 4.91427  | -2.19379 | -1.08193 |
| H  | 4.23350  | -4.77094 | -2.00562 |
| H  | 4.64272  | -3.42292 | -3.05797 |
| H  | -0.02243 | -1.53269 | -1.87248 |
| H  | -1.19144 | -2.90513 | -3.58959 |
| H  | 0.00312  | -4.72642 | -4.76079 |
| H  | 2.37776  | -5.22031 | -4.24178 |
| H  | -2.57590 | 0.78101  | 5.21725  |
| H  | -0.22759 | 1.57248  | 5.14420  |
| Cl | 1.98947  | 0.73347  | 3.62308  |
| H  | -1.16669 | -2.75398 | 1.15809  |
| H  | -3.48484 | -3.56192 | 1.30215  |
| H  | -5.06746 | -2.58956 | 2.95610  |
| H  | -4.33059 | -0.74516 | 4.43955  |
| Au | 1.04146  | 1.09784  | -0.14937 |
| C  | 0.87739  | 2.96216  | -0.99412 |
| C  | 2.08083  | 3.68221  | -1.08217 |
| C  | -0.30730 | 3.49728  | -1.47206 |
| C  | 2.07356  | 4.95141  | -1.65596 |
| C  | -0.30175 | 4.77316  | -2.04392 |
| H  | -1.23954 | 2.93660  | -1.41221 |
| C  | 0.88340  | 5.49311  | -2.13381 |
| H  | 2.99599  | 5.52645  | -1.73362 |
| H  | -1.22965 | 5.20013  | -2.42115 |
| H  | 0.88436  | 6.48558  | -2.58039 |
| C  | 2.99300  | 1.70669  | -0.01192 |
| C  | 4.00210  | 0.94452  | 0.55494  |
| C  | 3.24390  | 2.98660  | -0.53812 |
| C  | 5.30280  | 1.45509  | 0.59162  |
| H  | 3.80560  | -0.03861 | 0.98120  |
| C  | 4.54895  | 3.47501  | -0.49074 |
| C  | 5.57074  | 2.71387  | 0.06834  |
| H  | 6.09945  | 0.86332  | 1.03869  |

---

|   |          |          |          |
|---|----------|----------|----------|
| H | 4.77138  | 4.46334  | -0.89179 |
| H | 6.58325  | 3.11139  | 0.09939  |
| O | -1.11424 | 0.62720  | -0.50388 |
| C | -3.34994 | 1.20040  | -0.01940 |
| C | -2.00566 | 0.95894  | 0.32492  |
| C | -5.02904 | 1.50340  | -1.83476 |
| C | -3.73578 | 1.28155  | -1.35149 |
| C | -6.15802 | 1.57545  | -1.01124 |
| H | -1.72385 | 1.08193  | 1.38782  |
| H | -2.93590 | 1.16069  | -2.08591 |
| H | -4.04113 | 1.40986  | 0.79582  |
| C | -7.43541 | 2.15969  | -1.53751 |
| H | -5.98304 | 1.75950  | 0.05031  |
| H | -5.16806 | 1.58169  | -2.91398 |
| H | -7.36308 | 3.25601  | -1.51055 |
| H | -7.62037 | 1.87578  | -2.58121 |
| H | -8.31068 | 1.88082  | -0.94018 |
| C | -6.70941 | -0.42105 | -0.69240 |
| C | -5.63664 | -0.98508 | -0.00545 |
| C | -4.71948 | -1.54659 | -0.93310 |
| C | -5.23891 | -1.43721 | -2.19091 |
| C | -6.63930 | -0.94178 | -2.10654 |
| H | -7.65666 | -0.19079 | -0.20709 |
| H | -5.47736 | -0.94219 | 1.07024  |
| H | -3.73759 | -1.93728 | -0.67442 |
| H | -4.76100 | -1.75336 | -3.11375 |
| H | -6.93470 | -0.24553 | -2.89880 |
| H | -7.32412 | -1.80505 | -2.18703 |
| C | 2.95332  | -4.07339 | 0.68969  |
| H | 3.21321  | -4.64669 | 1.58444  |
| H | 2.45629  | -4.75404 | -0.02385 |
| O | 4.14264  | -3.52802 | 0.16730  |

M06/lanl2dz-6-31G(d) Energy = -2646.117876

M06/lanl2dz-6-31G(d) Free Energy = -2645.475846

M06/def2-TZVP Derived free energy = -2646.583584

---

M06/def2-TZVP Derived free energy in solution (toluene) = -2646.614542

M06/def2-TZVP Derived free energy in solution (nitromethane) = -2646.638898

Number of Imaginary Frequencies = 1 (-408.10)

M06/lanl2dz-6-31G(d) Geometry

|   |          |          |          |
|---|----------|----------|----------|
| C | 0.80671  | -0.53883 | -3.20051 |
| C | 2.33634  | -0.60535 | -3.47488 |
| C | 1.16495  | 1.79716  | -2.56744 |
| N | 0.55600  | 0.59510  | -2.28928 |
| C | -0.29587 | 0.76587  | -1.25318 |
| N | -0.16631 | 2.07974  | -0.98109 |
| N | 0.74920  | 2.73543  | -1.77390 |
| C | 2.86498  | -1.63911 | -2.47706 |
| C | 1.67684  | -2.52054 | -2.23156 |
| C | 0.50083  | -1.88715 | -2.63403 |
| C | -0.74067 | -2.49707 | -2.48948 |
| C | -0.79499 | -3.75828 | -1.90010 |
| C | 0.37799  | -4.39334 | -1.49149 |
| C | 1.62080  | -3.78701 | -1.66467 |
| C | -0.96652 | 2.83503  | -0.07179 |
| C | -0.66812 | 2.81782  | 1.31514  |
| C | -1.51616 | 3.54851  | 2.19733  |
| C | -2.60674 | 4.27569  | 1.66415  |
| C | -2.85531 | 4.30235  | 0.31751  |
| C | -2.02092 | 3.57837  | -0.55673 |
| C | 0.43733  | 2.11825  | 1.85322  |
| C | 0.67788  | 2.13117  | 3.20540  |
| C | -0.16677 | 2.84280  | 4.08364  |
| C | -1.23902 | 3.53770  | 3.58507  |
| H | 0.23752  | -0.31658 | -4.11485 |
| H | 2.46091  | -0.96866 | -4.50906 |
| H | 3.15469  | -1.11243 | -1.55139 |
| H | 3.75153  | -2.16869 | -2.84782 |
| H | -1.65271 | -1.99907 | -2.82325 |
| H | -1.75629 | -4.24899 | -1.76096 |
| H | 0.31979  | -5.38306 | -1.04232 |



---

|    |          |          |          |
|----|----------|----------|----------|
| H  | 2.53188  | -4.30148 | -1.35960 |
| H  | -3.25001 | 4.83078  | 2.34571  |
| H  | -3.68508 | 4.86967  | -0.09608 |
| Cl | -2.35963 | 3.64425  | -2.25924 |
| H  | 1.09899  | 1.57201  | 1.18150  |
| H  | 1.53073  | 1.58168  | 3.60539  |
| H  | 0.03768  | 2.84127  | 5.15189  |
| H  | -1.89512 | 4.09840  | 4.24981  |
| Au | -1.19549 | -0.76171 | 0.03645  |
| C  | -2.00964 | -2.14976 | 1.30937  |
| C  | -3.41036 | -2.11230 | 1.41944  |
| C  | -1.26482 | -3.07802 | 2.01734  |
| C  | -4.04686 | -2.99904 | 2.28539  |
| C  | -1.91604 | -3.96515 | 2.87990  |
| H  | -0.18306 | -3.13425 | 1.90019  |
| C  | -3.29839 | -3.91678 | 3.01745  |
| H  | -5.13172 | -2.98439 | 2.38854  |
| H  | -1.33687 | -4.69617 | 3.44169  |
| H  | -3.80167 | -4.60644 | 3.69233  |
| C  | -3.18066 | -0.40939 | -0.28102 |
| C  | -3.64318 | 0.49127  | -1.22185 |
| C  | -4.05545 | -1.14223 | 0.54022  |
| C  | -5.01942 | 0.70703  | -1.33547 |
| H  | -2.95733 | 1.03441  | -1.86859 |
| C  | -5.42429 | -0.91309 | 0.40909  |
| C  | -5.90095 | 0.01130  | -0.51701 |
| H  | -5.39130 | 1.42283  | -2.06719 |
| H  | -6.12775 | -1.46685 | 1.03045  |
| H  | -6.97241 | 0.18035  | -0.60506 |
| O  | 0.95580  | -1.21311 | 0.56356  |
| C  | 2.76209  | -0.99525 | 2.06446  |
| C  | 1.39488  | -0.96235 | 1.71640  |
| C  | 5.10289  | -1.37244 | 1.34141  |
| C  | 3.72131  | -1.51493 | 1.20512  |
| C  | 5.68973  | -0.54084 | 2.30375  |
| H  | 0.67909  | -0.66451 | 2.50440  |

---

|   |         |          |          |
|---|---------|----------|----------|
| H | 3.34566 | -2.05708 | 0.33445  |
| H | 3.02529 | -0.64324 | 3.06120  |
| C | 7.15942 | -0.64257 | 2.58424  |
| H | 5.08364 | -0.28507 | 3.17472  |
| H | 5.75092 | -1.85293 | 0.60658  |
| H | 7.33475 | -1.48524 | 3.26762  |
| H | 7.73994 | -0.84080 | 1.67445  |
| H | 7.56531 | 0.25293  | 3.06828  |
| C | 5.51818 | 1.39221  | 1.53478  |
| C | 4.16055 | 1.66410  | 1.36044  |
| C | 3.77982 | 1.34691  | 0.02607  |
| C | 4.88680 | 0.97988  | -0.68025 |
| C | 6.09952 | 1.19816  | 0.15337  |
| H | 6.09297 | 1.84867  | 2.33957  |
| H | 3.49063 | 2.05789  | 2.12212  |
| H | 2.76243 | 1.36620  | -0.36420 |
| H | 4.89517 | 0.67286  | -1.72332 |
| H | 6.87088 | 0.42639  | 0.05288  |
| H | 6.57367 | 2.14684  | -0.15507 |
| C | 2.26059 | 1.77855  | -3.57296 |
| H | 1.86523 | 1.78352  | -4.60373 |
| H | 2.91317 | 2.64814  | -3.45092 |
| O | 3.02647 | 0.62013  | -3.31638 |

Bottom, away, 1, exo, away

M06/lanl2dz-6-31G(d) Energy = -2646.115809

M06/lanl2dz-6-31G(d) Free Energy = -2645.476282

M06/def2-TZVP Derived free energy = -2646.587388

M06/def2-TZVP Derived free energy in solution (toluene) = -2646.618557

M06/def2-TZVP Derived free energy in solution (nitromethane) = -2646.643353

Number of Imaginary Frequencies = 1 (-399.89)

M06/lanl2dz-6-31G(d) Geometry

|   |          |          |         |
|---|----------|----------|---------|
| C | -3.22720 | -1.16509 | 1.87539 |
| C | -3.70674 | -2.26807 | 2.83990 |

---

|    |          |          |          |
|----|----------|----------|----------|
| C  | -2.41957 | -3.19482 | 0.60760  |
| N  | -2.41749 | -1.83320 | 0.82075  |
| C  | -1.56181 | -1.26827 | -0.06644 |
| N  | -1.08570 | -2.31775 | -0.74782 |
| N  | -1.60518 | -3.52515 | -0.34938 |
| C  | -2.53886 | -2.45116 | 3.82912  |
| C  | -1.96772 | -1.06239 | 3.88312  |
| C  | -2.39320 | -0.30911 | 2.78364  |
| C  | -2.08144 | 1.04074  | 2.67246  |
| C  | -1.26606 | 1.61900  | 3.64268  |
| C  | -0.80623 | 0.86045  | 4.71860  |
| C  | -1.16840 | -0.47835 | 4.85719  |
| C  | -0.10542 | -2.28574 | -1.78258 |
| C  | 1.22017  | -2.70215 | -1.47779 |
| C  | 2.19074  | -2.67153 | -2.52169 |
| C  | 1.80717  | -2.22802 | -3.81032 |
| C  | 0.52201  | -1.83714 | -4.07837 |
| C  | -0.44684 | -1.87810 | -3.05378 |
| C  | 1.61376  | -3.13491 | -0.18883 |
| C  | 2.90945  | -3.52083 | 0.04685  |
| C  | 3.87144  | -3.49879 | -0.98643 |
| C  | 3.51760  | -3.08124 | -2.24317 |
| H  | -4.05068 | -0.64029 | 1.37443  |
| H  | -4.56646 | -1.86083 | 3.38634  |
| H  | -1.79743 | -3.17365 | 3.45251  |
| H  | -2.87935 | -2.82762 | 4.80109  |
| H  | -2.48813 | 1.64561  | 1.86210  |
| H  | -1.00619 | 2.67322  | 3.56775  |
| H  | -0.18119 | 1.32812  | 5.47725  |
| H  | -0.84353 | -1.05123 | 5.72495  |
| H  | 2.55547  | -2.20893 | -4.60207 |
| H  | 0.22287  | -1.50843 | -5.07048 |
| Cl | -2.07482 | -1.43027 | -3.44642 |
| H  | 0.88260  | -3.15800 | 0.61647  |
| H  | 3.20030  | -3.85183 | 1.04235  |
| H  | 4.89238  | -3.81426 | -0.77821 |

---

|    |          |          |          |
|----|----------|----------|----------|
| H  | 4.24707  | -3.06335 | -3.05282 |
| Au | -1.01926 | 0.79880  | -0.35859 |
| C  | -0.57802 | 2.79875  | -0.52528 |
| C  | -1.66296 | 3.61856  | -0.88139 |
| C  | 0.66096  | 3.35215  | -0.24427 |
| C  | -1.47679 | 4.99718  | -0.96645 |
| C  | 0.83692  | 4.73568  | -0.33415 |
| H  | 1.49595  | 2.71913  | 0.05632  |
| C  | -0.22872 | 5.55127  | -0.69636 |
| H  | -2.30576 | 5.64893  | -1.24108 |
| H  | 1.80989  | 5.17577  | -0.11747 |
| H  | -0.09101 | 6.62861  | -0.76550 |
| C  | -2.85036 | 1.50464  | -0.94183 |
| C  | -3.95265 | 0.69722  | -1.17003 |
| C  | -2.91126 | 2.89852  | -1.12311 |
| C  | -5.15770 | 1.28258  | -1.56854 |
| H  | -3.89420 | -0.38523 | -1.06250 |
| C  | -4.12493 | 3.46208  | -1.51695 |
| C  | -5.23997 | 2.65961  | -1.73583 |
| H  | -6.02648 | 0.65356  | -1.75323 |
| H  | -4.20052 | 4.53919  | -1.66282 |
| H  | -6.17849 | 3.11396  | -2.04706 |
| O  | 1.05963  | 0.22901  | 0.19320  |
| C  | 3.32329  | 0.01073  | -0.44968 |
| C  | 1.96080  | 0.27691  | -0.68706 |
| C  | 5.10369  | -0.62740 | 1.16233  |
| C  | 3.77436  | -0.37899 | 0.80151  |
| C  | 6.18224  | -0.48017 | 0.28318  |
| H  | 1.68179  | 0.55314  | -1.72252 |
| H  | 3.00808  | -0.48848 | 1.57209  |
| H  | 3.98830  | 0.06644  | -1.31018 |
| C  | 7.50295  | -1.11532 | 0.60802  |
| H  | 5.95005  | -0.45372 | -0.78338 |
| H  | 5.31221  | -0.92233 | 2.19202  |
| H  | 8.33620  | -0.68143 | 0.04397  |
| H  | 7.73802  | -1.05391 | 1.67811  |

---

|   |          |          |          |
|---|----------|----------|----------|
| H | 7.46094  | -2.18302 | 0.34883  |
| C | 6.67524  | 1.55479  | 0.35063  |
| C | 5.55954  | 2.23277  | -0.13766 |
| C | 4.70045  | 2.57629  | 0.94024  |
| C | 5.29504  | 2.21404  | 2.11378  |
| C | 6.68905  | 1.76979  | 1.84401  |
| H | 7.59289  | 1.45934  | -0.22785 |
| H | 5.35449  | 2.43383  | -1.18641 |
| H | 3.71214  | 3.01685  | 0.83546  |
| H | 4.87370  | 2.32963  | 3.10813  |
| H | 7.37141  | 2.61186  | 2.05848  |
| H | 7.03794  | 0.93194  | 2.45674  |
| C | -3.24496 | -4.11865 | 1.43771  |
| H | -3.79385 | -4.81165 | 0.79027  |
| H | -2.58444 | -4.72857 | 2.07792  |
| O | -4.19453 | -3.41221 | 2.18839  |

M06/lanl2dz-6-31G(d) Energy = -2646.115959

M06/lanl2dz-6-31G(d) Free Energy = -2645.477485

M06/def2-TZVP Derived free energy = -2646.587889

M06/def2-TZVP Derived free energy in solution (toluene) = -2646.619334

M06/def2-TZVP Derived free energy in solution (nitromethane) = -2646.644655

Number of Imaginary Frequencies = 1 (-376.33)

M06/lanl2dz-6-31G(d) Geometry

|   |          |          |          |
|---|----------|----------|----------|
| C | -3.92190 | -1.15960 | 0.95277  |
| C | -4.71984 | -2.32474 | 1.57056  |
| C | -2.82845 | -3.08935 | -0.25822 |
| N | -2.84125 | -1.76618 | 0.12637  |
| C | -1.72776 | -1.17240 | -0.36738 |
| N | -1.10350 | -2.16833 | -1.00849 |
| N | -1.76815 | -3.36969 | -0.95563 |
| C | -3.93144 | -2.70125 | 2.84015  |
| C | -3.36133 | -1.37200 | 3.24730  |
| C | -3.39199 | -0.47152 | 2.17697  |
| C | -3.01687 | 0.85646  | 2.34402  |

---

|    |          |          |          |
|----|----------|----------|----------|
| C  | -2.52956 | 1.26069  | 3.58482  |
| C  | -2.45898 | 0.35474  | 4.64264  |
| C  | -2.89279 | -0.96054 | 4.48803  |
| C  | 0.15523  | -2.09035 | -1.67311 |
| C  | 1.29740  | -2.65239 | -1.03730 |
| C  | 2.55183  | -2.56546 | -1.70947 |
| C  | 2.62052  | -1.91574 | -2.96561 |
| C  | 1.50490  | -1.38698 | -3.55822 |
| C  | 0.25593  | -1.48918 | -2.90894 |
| C  | 1.23959  | -3.27985 | 0.22983  |
| C  | 2.37390  | -3.81017 | 0.79348  |
| C  | 3.61410  | -3.73717 | 0.12480  |
| C  | 3.69955  | -3.12269 | -1.09839 |
| H  | -4.52244 | -0.52381 | 0.28923  |
| H  | -5.69344 | -1.91905 | 1.87232  |
| H  | -3.13316 | -3.42871 | 2.62180  |
| H  | -4.57407 | -3.15872 | 3.60178  |
| H  | -3.12976 | 1.57906  | 1.53585  |
| H  | -2.22222 | 2.29463  | 3.73035  |
| H  | -2.08729 | 0.68768  | 5.60999  |
| H  | -2.87666 | -1.64919 | 5.33182  |
| H  | 3.58485  | -1.85244 | -3.46990 |
| H  | 1.55286  | -0.90335 | -4.53071 |
| Cl | -1.14080 | -0.86039 | -3.71983 |
| H  | 0.28814  | -3.33845 | 0.75406  |
| H  | 2.31442  | -4.29526 | 1.76585  |
| H  | 4.50265  | -4.16519 | 0.58576  |
| H  | 4.65402  | -3.05376 | -1.62220 |
| Au | -1.03571 | 0.85719  | -0.15630 |
| C  | -0.48600 | 2.81878  | 0.11836  |
| C  | -1.33706 | 3.76133  | -0.48560 |
| C  | 0.58826  | 3.23174  | 0.89082  |
| C  | -1.07495 | 5.12040  | -0.32347 |
| C  | 0.84078  | 4.59793  | 1.04687  |
| H  | 1.22681  | 2.50541  | 1.39230  |
| C  | 0.01487  | 5.53477  | 0.43674  |

---

|   |          |          |          |
|---|----------|----------|----------|
| H | -1.72265 | 5.86592  | -0.78417 |
| H | 1.68231  | 4.92689  | 1.65510  |
| H | 0.21263  | 6.59795  | 0.56035  |
| C | -2.52110 | 1.77705  | -1.22109 |
| C | -3.52177 | 1.09872  | -1.89808 |
| C | -2.45382 | 3.18211  | -1.22869 |
| C | -4.49635 | 1.82599  | -2.58649 |
| H | -3.55073 | 0.00981  | -1.92144 |
| C | -3.43718 | 3.88851  | -1.92095 |
| C | -4.45239 | 3.21491  | -2.59232 |
| H | -5.28489 | 1.29871  | -3.12032 |
| H | -3.40964 | 4.97759  | -1.93957 |
| H | -5.21242 | 3.78015  | -3.12802 |
| O | 0.68564  | 0.03968  | 0.98586  |
| C | 3.01155  | -0.31873 | 1.09946  |
| C | 1.83105  | 0.09891  | 0.46781  |
| C | 5.46377  | -0.67125 | 0.88187  |
| C | 4.21094  | -0.24162 | 0.42201  |
| C | 6.60461  | -0.72036 | 0.06199  |
| H | 1.94075  | 0.51120  | -0.55786 |
| H | 4.17992  | 0.16151  | -0.59891 |
| H | 2.95036  | -0.73482 | 2.10568  |
| C | 7.68355  | -1.72277 | 0.37682  |
| H | 6.41764  | -0.58297 | -1.00690 |
| H | 5.52607  | -1.07499 | 1.89639  |
| H | 7.95540  | -1.70255 | 1.44051  |
| H | 7.32202  | -2.73680 | 0.15382  |
| H | 8.59288  | -1.56398 | -0.21313 |
| C | 7.63611  | 1.01319  | 0.36228  |
| C | 6.88038  | 1.95291  | -0.34635 |
| C | 5.84393  | 2.44121  | 0.47788  |
| C | 6.00241  | 1.91936  | 1.73859  |
| C | 7.31897  | 1.23447  | 1.81984  |
| H | 8.62607  | 0.70138  | 0.03213  |
| H | 7.00495  | 2.18601  | -1.40107 |
| H | 5.02724  | 3.08087  | 0.15457  |

---

|   |          |          |          |
|---|----------|----------|----------|
| H | 5.34370  | 2.08749  | 2.58617  |
| H | 8.05686  | 1.95787  | 2.21224  |
| H | 7.36174  | 0.35685  | 2.47283  |
| C | -3.90253 | -4.03713 | 0.15617  |
| H | -4.24044 | -4.61992 | -0.70801 |
| H | -3.49433 | -4.75401 | 0.88988  |
| O | -5.01632 | -3.35174 | 0.65930  |

M06/lanl2dz-6-31G(d) Energy = -2646.115959

M06/lanl2dz-6-31G(d) Free Energy = -2645.477487

M06/def2-TZVP Derived free energy = -2646.587891

M06/def2-TZVP Derived free energy in solution (toluene) = -2646.619336

M06/def2-TZVP Derived free energy in solution (nitromethane) = -2646.644657

Number of Imaginary Frequencies = 1 (-376.33)

M06/lanl2dz-6-31G(d) Geometry

|   |          |          |          |
|---|----------|----------|----------|
| C | -3.92191 | -1.15959 | 0.95276  |
| C | -4.71985 | -2.32473 | 1.57056  |
| C | -2.82846 | -3.08934 | -0.25822 |
| N | -2.84127 | -1.76617 | 0.12637  |
| C | -1.72778 | -1.17239 | -0.36739 |
| N | -1.10352 | -2.16833 | -1.00849 |
| N | -1.76817 | -3.36969 | -0.95563 |
| C | -3.93145 | -2.70123 | 2.84015  |
| C | -3.36134 | -1.37198 | 3.24730  |
| C | -3.39201 | -0.47150 | 2.17696  |
| C | -3.01688 | 0.85648  | 2.34400  |
| C | -2.52958 | 1.26071  | 3.58480  |
| C | -2.45899 | 0.35476  | 4.64262  |
| C | -2.89280 | -0.96051 | 4.48802  |
| C | 0.15521  | -2.09034 | -1.67312 |
| C | 1.29738  | -2.65240 | -1.03731 |
| C | 2.55181  | -2.56547 | -1.70948 |
| C | 2.62050  | -1.91573 | -2.96562 |
| C | 1.50488  | -1.38697 | -3.55822 |
| C | 0.25591  | -1.48916 | -2.90895 |



---

|    |          |          |          |
|----|----------|----------|----------|
| C  | 1.23957  | -3.27988 | 0.22980  |
| C  | 2.37388  | -3.81021 | 0.79345  |
| C  | 3.61408  | -3.73720 | 0.12477  |
| C  | 3.69952  | -3.12270 | -1.09841 |
| H  | -4.52246 | -0.52380 | 0.28922  |
| H  | -5.69345 | -1.91905 | 1.87233  |
| H  | -3.13316 | -3.42870 | 2.62180  |
| H  | -4.57407 | -3.15870 | 3.60178  |
| H  | -3.12978 | 1.57907  | 1.53583  |
| H  | -2.22223 | 2.29465  | 3.73033  |
| H  | -2.08730 | 0.68771  | 5.60998  |
| H  | -2.87666 | -1.64916 | 5.33182  |
| H  | 3.58483  | -1.85243 | -3.46990 |
| H  | 1.55284  | -0.90332 | -4.53070 |
| Cl | -1.14082 | -0.86036 | -3.71983 |
| H  | 0.28812  | -3.33847 | 0.75404  |
| H  | 2.31440  | -4.29530 | 1.76581  |
| H  | 4.50262  | -4.16523 | 0.58573  |
| H  | 4.65400  | -3.05377 | -1.62223 |
| Au | -1.03571 | 0.85719  | -0.15629 |
| C  | -0.48596 | 2.81876  | 0.11836  |
| C  | -1.33700 | 3.76133  | -0.48559 |
| C  | 0.58832  | 3.23170  | 0.89082  |
| C  | -1.07485 | 5.12040  | -0.32348 |
| C  | 0.84087  | 4.59790  | 1.04685  |
| H  | 1.22685  | 2.50536  | 1.39230  |
| C  | 0.01498  | 5.53475  | 0.43672  |
| H  | -1.72254 | 5.86593  | -0.78418 |
| H  | 1.68241  | 4.92684  | 1.65507  |
| H  | 0.21276  | 6.59793  | 0.56032  |
| C  | -2.52108 | 1.77708  | -1.22108 |
| C  | -3.52176 | 1.09876  | -1.89807 |
| C  | -2.45378 | 3.18213  | -1.22868 |
| C  | -4.49634 | 1.82605  | -2.58647 |
| H  | -3.55074 | 0.00986  | -1.92143 |
| C  | -3.43712 | 3.88855  | -1.92094 |

---

|   |          |          |          |
|---|----------|----------|----------|
| C | -4.45235 | 3.21497  | -2.59231 |
| H | -5.28488 | 1.29879  | -3.12030 |
| H | -3.40956 | 4.97763  | -1.93956 |
| H | -5.21237 | 3.78023  | -3.12800 |
| O | 0.68563  | 0.03965  | 0.98587  |
| C | 3.01154  | -0.31877 | 1.09947  |
| C | 1.83104  | 0.09888  | 0.46783  |
| C | 5.46376  | -0.67128 | 0.88187  |
| C | 4.21093  | -0.24165 | 0.42202  |
| C | 6.60460  | -0.72037 | 0.06198  |
| H | 1.94075  | 0.51119  | -0.55784 |
| H | 4.17990  | 0.16150  | -0.59889 |
| H | 2.95034  | -0.73487 | 2.10569  |
| C | 7.68354  | -1.72277 | 0.37678  |
| H | 6.41761  | -0.58296 | -1.00690 |
| H | 5.52607  | -1.07504 | 1.89638  |
| H | 7.95541  | -1.70256 | 1.44048  |
| H | 7.32202  | -2.73681 | 0.15379  |
| H | 8.59286  | -1.56398 | -0.21317 |
| C | 7.63608  | 1.01318  | 0.36229  |
| C | 6.88034  | 1.95291  | -0.34632 |
| C | 5.84390  | 2.44119  | 0.47794  |
| C | 6.00240  | 1.91931  | 1.73864  |
| C | 7.31896  | 1.23443  | 1.81986  |
| H | 8.62604  | 0.70138  | 0.03212  |
| H | 7.00489  | 2.18603  | -1.40103 |
| H | 5.02719  | 3.08085  | 0.15465  |
| H | 5.34369  | 2.08742  | 2.58623  |
| H | 8.05685  | 1.95783  | 2.21225  |
| H | 7.36174  | 0.35680  | 2.47283  |
| O | -5.01633 | -3.35173 | 0.65931  |
| C | -3.90254 | -4.03712 | 0.15618  |
| H | -4.24046 | -4.61992 | -0.70800 |
| H | -3.49435 | -4.75400 | 0.88988  |

M06/lanl2dz-6-31G(d) Energy = -2646.118888

---

M06/lanl2dz-6-31G(d) Free Energy = -2645.480577  
M06/def2-TZVP Derived free energy = -2646.592373  
M06/def2-TZVP Derived free energy in solution (toluene) = -2646.624068  
M06/def2-TZVP Derived free energy in solution (nitromethane) = -2646.649991  
Number of Imaginary Frequencies = 1 (-377.56)

M06/lanl2dz-6-31G(d) Geometry

|   |          |          |          |
|---|----------|----------|----------|
| C | -3.77248 | -1.23636 | 0.67888  |
| C | -4.99090 | -2.17699 | 0.57490  |
| C | -2.71241 | -2.90347 | -0.85857 |
| N | -2.72519 | -1.67107 | -0.24788 |
| C | -1.59834 | -1.00689 | -0.59273 |
| N | -0.96111 | -1.87975 | -1.38454 |
| N | -1.63549 | -3.06596 | -1.56655 |
| C | -5.68161 | -2.01385 | 1.92514  |
| C | -4.53592 | -1.72381 | 2.85737  |
| C | -3.41138 | -1.31158 | 2.14052  |
| C | -2.21622 | -1.01252 | 2.77896  |
| C | -2.16569 | -1.12063 | 4.16832  |
| C | -3.28949 | -1.51620 | 4.89059  |
| C | -4.48277 | -1.82434 | 4.23973  |
| C | 0.32790  | -1.71232 | -1.96799 |
| C | 1.42731  | -2.39407 | -1.37781 |
| C | 2.70973  | -2.25111 | -1.98242 |
| C | 2.84834  | -1.41909 | -3.11999 |
| C | 1.77487  | -0.76139 | -3.65992 |
| C | 0.49677  | -0.92246 | -3.08371 |
| C | 1.29865  | -3.18942 | -0.21432 |
| C | 2.39451  | -3.82837 | 0.31131  |
| C | 3.66067  | -3.71047 | -0.30005 |
| C | 3.81363  | -2.93442 | -1.42069 |
| H | -4.05597 | -0.21225 | 0.38825  |
| H | -5.62906 | -1.93837 | -0.29400 |
| H | -6.24498 | -2.92039 | 2.17765  |
| H | -6.39684 | -1.17851 | 1.88842  |
| H | -1.32268 | -0.72219 | 2.22293  |

---

|    |          |          |          |
|----|----------|----------|----------|
| H  | -1.23809 | -0.89639 | 4.69136  |
| H  | -3.23143 | -1.59680 | 5.97441  |
| H  | -5.35354 | -2.15053 | 4.80703  |
| H  | 3.83369  | -1.31284 | -3.57417 |
| H  | 1.87753  | -0.13007 | -4.53895 |
| Cl | -0.84779 | -0.11679 | -3.82369 |
| H  | 0.32632  | -3.28573 | 0.26584  |
| H  | 2.28396  | -4.43892 | 1.20523  |
| H  | 4.51574  | -4.23330 | 0.12560  |
| H  | 4.78899  | -2.83077 | -1.89824 |
| Au | -0.99844 | 1.00122  | -0.05233 |
| C  | -0.51375 | 2.92141  | 0.48855  |
| C  | -1.37801 | 3.91361  | -0.00482 |
| C  | 0.55321  | 3.25407  | 1.30716  |
| C  | -1.14159 | 5.24668  | 0.32224  |
| C  | 0.78022  | 4.59557  | 1.62851  |
| H  | 1.20555  | 2.48339  | 1.71602  |
| C  | -0.06230 | 5.58405  | 1.13420  |
| H  | -1.79908 | 6.03113  | -0.05178 |
| H  | 1.61563  | 4.86410  | 2.27340  |
| H  | 0.11693  | 6.62761  | 1.38619  |
| C  | -2.49192 | 2.01363  | -1.01717 |
| C  | -3.44558 | 1.40650  | -1.81828 |
| C  | -2.46656 | 3.40833  | -0.83706 |
| C  | -4.42085 | 2.19358  | -2.43728 |
| H  | -3.43681 | 0.33157  | -1.99500 |
| C  | -3.45036 | 4.17398  | -1.46119 |
| C  | -4.42328 | 3.57007  | -2.25181 |
| H  | -5.17130 | 1.72257  | -3.06954 |
| H  | -3.45680 | 5.25607  | -1.33441 |
| H  | -5.18326 | 4.18232  | -2.73307 |
| O  | 0.71956  | 0.07273  | 1.02270  |
| C  | 3.02618  | -0.38982 | 1.12835  |
| C  | 1.87991  | 0.16131  | 0.54015  |
| C  | 5.45738  | -0.84443 | 0.91237  |
| C  | 4.24901  | -0.26765 | 0.49953  |

---

|   |          |          |          |
|---|----------|----------|----------|
| C | 6.61322  | -0.85590 | 0.11457  |
| H | 2.02679  | 0.70710  | -0.41563 |
| H | 4.27303  | 0.29484  | -0.44312 |
| H | 2.91873  | -0.95476 | 2.05518  |
| C | 7.58972  | -1.99120 | 0.26870  |
| H | 6.47140  | -0.52121 | -0.91701 |
| H | 5.45953  | -1.40784 | 1.84986  |
| H | 7.82457  | -2.18318 | 1.32409  |
| H | 7.14431  | -2.91162 | -0.13661 |
| H | 8.52921  | -1.81901 | -0.26772 |
| C | 7.78729  | 0.70755  | 0.73051  |
| C | 7.15100  | 1.80426  | 0.14371  |
| C | 6.12082  | 2.26245  | 0.99476  |
| C | 6.17195  | 1.55238  | 2.16858  |
| C | 7.41505  | 0.73728  | 2.19061  |
| H | 8.76009  | 0.35329  | 0.39269  |
| H | 7.34735  | 2.17784  | -0.85837 |
| H | 5.38390  | 3.01955  | 0.74217  |
| H | 5.49174  | 1.65812  | 3.00905  |
| H | 8.19455  | 1.31808  | 2.71685  |
| H | 7.34550  | -0.22767 | 2.70266  |
| C | -3.87894 | -3.81754 | -0.69553 |
| H | -4.54732 | -3.71435 | -1.57072 |
| H | -3.54750 | -4.85977 | -0.64904 |
| O | -4.55466 | -3.52239 | 0.49494  |

M06/lanl2dz-6-31G(d) Energy = -2646.115959

M06/lanl2dz-6-31G(d) Free Energy = -2645.477487

M06/def2-TZVP Derived free energy = -2646.587891

M06/def2-TZVP Derived free energy in solution (toluene) = -2646.619336

M06/def2-TZVP Derived free energy in solution (nitromethane) = -2646.644657

Number of Imaginary Frequencies = 1 (-376.33)

M06/lanl2dz-6-31G(d) Geometry

|   |          |          |         |
|---|----------|----------|---------|
| C | -3.92191 | -1.15959 | 0.95276 |
| C | -4.71985 | -2.32473 | 1.57056 |

---

|    |          |          |          |
|----|----------|----------|----------|
| C  | -2.82847 | -3.08934 | -0.25822 |
| N  | -2.84127 | -1.76617 | 0.12636  |
| C  | -1.72778 | -1.17239 | -0.36739 |
| N  | -1.10352 | -2.16833 | -1.00849 |
| N  | -1.76817 | -3.36968 | -0.95563 |
| C  | -3.93145 | -2.70123 | 2.84015  |
| C  | -3.36134 | -1.37198 | 3.24729  |
| C  | -3.39201 | -0.47150 | 2.17696  |
| C  | -3.01689 | 0.85648  | 2.34400  |
| C  | -2.52958 | 1.26071  | 3.58480  |
| C  | -2.45899 | 0.35476  | 4.64262  |
| C  | -2.89280 | -0.96051 | 4.48802  |
| C  | 0.15521  | -2.09034 | -1.67312 |
| C  | 1.29738  | -2.65240 | -1.03732 |
| C  | 2.55181  | -2.56546 | -1.70948 |
| C  | 2.62050  | -1.91573 | -2.96562 |
| C  | 1.50488  | -1.38696 | -3.55822 |
| C  | 0.25591  | -1.48916 | -2.90895 |
| C  | 1.23956  | -3.27988 | 0.22980  |
| C  | 2.37388  | -3.81021 | 0.79345  |
| C  | 3.61408  | -3.73720 | 0.12477  |
| C  | 3.69952  | -3.12270 | -1.09842 |
| H  | -4.52247 | -0.52380 | 0.28922  |
| H  | -5.69345 | -1.91904 | 1.87232  |
| H  | -3.13317 | -3.42869 | 2.62180  |
| H  | -4.57408 | -3.15870 | 3.60178  |
| H  | -3.12979 | 1.57907  | 1.53583  |
| H  | -2.22224 | 2.29466  | 3.73033  |
| H  | -2.08731 | 0.68772  | 5.60997  |
| H  | -2.87667 | -1.64916 | 5.33182  |
| H  | 3.58483  | -1.85243 | -3.46990 |
| H  | 1.55284  | -0.90332 | -4.53070 |
| Cl | -1.14082 | -0.86036 | -3.71983 |
| H  | 0.28812  | -3.33847 | 0.75404  |
| H  | 2.31440  | -4.29531 | 1.76581  |
| H  | 4.50262  | -4.16523 | 0.58572  |

---

|    |          |          |          |
|----|----------|----------|----------|
| H  | 4.65399  | -3.05377 | -1.62223 |
| Au | -1.03571 | 0.85719  | -0.15629 |
| C  | -0.48596 | 2.81876  | 0.11836  |
| C  | -1.33699 | 3.76133  | -0.48559 |
| C  | 0.58832  | 3.23170  | 0.89082  |
| C  | -1.07484 | 5.12040  | -0.32348 |
| C  | 0.84088  | 4.59789  | 1.04685  |
| H  | 1.22685  | 2.50536  | 1.39230  |
| C  | 0.01500  | 5.53474  | 0.43671  |
| H  | -1.72253 | 5.86593  | -0.78418 |
| H  | 1.68243  | 4.92683  | 1.65507  |
| H  | 0.21278  | 6.59792  | 0.56032  |
| C  | -2.52108 | 1.77708  | -1.22108 |
| C  | -3.52176 | 1.09876  | -1.89807 |
| C  | -2.45377 | 3.18214  | -1.22868 |
| C  | -4.49634 | 1.82606  | -2.58647 |
| H  | -3.55074 | 0.00986  | -1.92143 |
| C  | -3.43711 | 3.88855  | -1.92094 |
| C  | -4.45234 | 3.21498  | -2.59230 |
| H  | -5.28488 | 1.29880  | -3.12030 |
| H  | -3.40955 | 4.97764  | -1.93955 |
| H  | -5.21236 | 3.78024  | -3.12800 |
| O  | 0.68563  | 0.03964  | 0.98587  |
| C  | 3.01153  | -0.31877 | 1.09947  |
| C  | 1.83104  | 0.09887  | 0.46783  |
| C  | 5.46376  | -0.67128 | 0.88187  |
| C  | 4.21093  | -0.24165 | 0.42202  |
| C  | 6.60460  | -0.72037 | 0.06198  |
| H  | 1.94075  | 0.51118  | -0.55784 |
| H  | 4.17990  | 0.16150  | -0.59889 |
| H  | 2.95034  | -0.73488 | 2.10569  |
| C  | 7.68354  | -1.72278 | 0.37678  |
| H  | 6.41761  | -0.58297 | -1.00690 |
| H  | 5.52607  | -1.07505 | 1.89638  |
| H  | 7.95541  | -1.70256 | 1.44047  |
| H  | 7.32201  | -2.73681 | 0.15379  |

---

|   |          |          |          |
|---|----------|----------|----------|
| H | 8.59286  | -1.56399 | -0.21318 |
| C | 7.63608  | 1.01318  | 0.36229  |
| C | 6.88033  | 1.95291  | -0.34631 |
| C | 5.84389  | 2.44118  | 0.47795  |
| C | 6.00240  | 1.91930  | 1.73864  |
| C | 7.31896  | 1.23443  | 1.81986  |
| H | 8.62604  | 0.70138  | 0.03212  |
| H | 7.00488  | 2.18603  | -1.40103 |
| H | 5.02719  | 3.08085  | 0.15466  |
| H | 5.34370  | 2.08741  | 2.58624  |
| H | 8.05685  | 1.95782  | 2.21226  |
| H | 7.36175  | 0.35679  | 2.47282  |
| O | -5.01634 | -3.35173 | 0.65931  |
| C | -3.90254 | -4.03712 | 0.15617  |
| H | -4.24046 | -4.61992 | -0.70800 |
| H | -3.49435 | -4.75400 | 0.88988  |

Top, toward, 1, exo, away

M06/lanl2dz-6-31G(d) Energy = -2646.112313

M06/lanl2dz-6-31G(d) Free Energy = -2645.473743

M06/def2-TZVP Derived free energy = -2646.584174

M06/def2-TZVP Derived free energy in solution (toluene) = -2646.615566

M06/def2-TZVP Derived free energy in solution (nitromethane) = -2646.640945

Number of Imaginary Frequencies = 1 (-384.24)

M06/lanl2dz-6-31G(d) Geometry

|   |          |          |          |
|---|----------|----------|----------|
| C | -3.46890 | -1.32251 | 0.91661  |
| C | -4.59678 | -2.37094 | 1.04896  |
| C | -2.39966 | -3.10083 | -0.49148 |
| N | -2.44307 | -1.80887 | -0.01896 |
| C | -1.39519 | -1.12529 | -0.54115 |
| N | -0.77027 | -2.04964 | -1.28747 |
| N | -1.37929 | -3.28345 | -1.27391 |
| C | -5.19465 | -2.09389 | 2.42396  |
| C | -4.02605 | -1.55711 | 3.20329  |



---

|    |          |          |          |
|----|----------|----------|----------|
| C  | -3.01756 | -1.12323 | 2.34163  |
| C  | -1.85428 | -0.54982 | 2.83559  |
| C  | -1.69718 | -0.43515 | 4.21531  |
| C  | -2.69779 | -0.87779 | 5.07782  |
| C  | -3.87213 | -1.43600 | 4.57717  |
| C  | 0.45285  | -1.87585 | -1.99972 |
| C  | 1.61199  | -2.55656 | -1.53217 |
| C  | 2.83765  | -2.35297 | -2.22940 |
| C  | 2.86318  | -1.48920 | -3.35119 |
| C  | 1.73181  | -0.85335 | -3.78571 |
| C  | 0.51216  | -1.05770 | -3.10695 |
| C  | 1.60304  | -3.41603 | -0.40585 |
| C  | 2.75011  | -4.05739 | -0.00777 |
| C  | 3.96000  | -3.87274 | -0.70936 |
| C  | 3.99992  | -3.03345 | -1.79508 |
| H  | -3.86810 | -0.38747 | 0.49321  |
| H  | -5.32240 | -2.30448 | 0.21943  |
| H  | -5.63118 | -3.01049 | 2.83906  |
| H  | -6.00005 | -1.34837 | 2.34725  |
| H  | -1.07523 | -0.18430 | 2.16535  |
| H  | -0.78796 | 0.00554  | 4.61968  |
| H  | -2.56193 | -0.78423 | 6.15355  |
| H  | -4.65281 | -1.77951 | 5.25457  |
| H  | 3.80592  | -1.34521 | -3.87927 |
| H  | 1.74393  | -0.20101 | -4.65511 |
| Cl | -0.90162 | -0.25873 | -3.71410 |
| H  | 0.67215  | -3.59369 | 0.12840  |
| H  | 2.72217  | -4.72614 | 0.85035  |
| H  | 4.85477  | -4.40793 | -0.39576 |
| H  | 4.92604  | -2.88518 | -2.35216 |
| Au | -0.90439 | 0.98560  | -0.32603 |
| C  | -0.56385 | 2.98593  | -0.02600 |
| C  | -1.64518 | 3.83117  | -0.32272 |
| C  | 0.61874  | 3.48909  | 0.48700  |
| C  | -1.52039 | 5.19839  | -0.08688 |
| C  | 0.73155  | 4.86334  | 0.71663  |

---

|   |          |          |          |
|---|----------|----------|----------|
| H | 1.44815  | 2.82092  | 0.71323  |
| C | -0.33395 | 5.70945  | 0.43244  |
| H | -2.34606 | 5.87404  | -0.30881 |
| H | 1.65708  | 5.27058  | 1.12108  |
| H | -0.24253 | 6.77865  | 0.61422  |
| C | -2.66265 | 1.75712  | -1.04404 |
| C | -3.64252 | 0.99856  | -1.66465 |
| C | -2.80187 | 3.14872  | -0.89436 |
| C | -4.81352 | 1.62033  | -2.10750 |
| H | -3.50704 | -0.06927 | -1.83458 |
| C | -3.98129 | 3.74819  | -1.33506 |
| C | -4.98309 | 2.98783  | -1.93027 |
| H | -5.58533 | 1.02988  | -2.59797 |
| H | -4.11520 | 4.82402  | -1.22611 |
| H | -5.89612 | 3.47136  | -2.27193 |
| O | 1.14253  | 0.47458  | 0.39952  |
| C | 2.74796  | -0.65884 | 1.70965  |
| C | 1.48863  | -0.51171 | 1.10456  |
| C | 4.95781  | 0.34268  | 2.25994  |
| C | 3.70980  | 0.33229  | 1.62581  |
| C | 5.81201  | 1.46030  | 2.24681  |
| H | 0.75767  | -1.32448 | 1.27974  |
| H | 3.44961  | 1.21384  | 1.03034  |
| H | 2.93271  | -1.56699 | 2.28348  |
| C | 6.80789  | 1.63362  | 3.36142  |
| H | 5.36265  | 2.39117  | 1.89270  |
| H | 5.24450  | -0.53204 | 2.85053  |
| H | 7.35236  | 0.70228  | 3.56642  |
| H | 7.53911  | 2.42271  | 3.15514  |
| H | 6.27999  | 1.91082  | 4.28402  |
| C | 7.09196  | 1.19491  | 0.66458  |
| C | 6.28567  | 1.47683  | -0.44258 |
| C | 5.57648  | 0.31452  | -0.81563 |
| C | 6.00859  | -0.73082 | -0.03531 |
| C | 7.21405  | -0.30710 | 0.72256  |
| H | 7.90711  | 1.84988  | 0.96905  |

---

|   |          |          |          |
|---|----------|----------|----------|
| H | 6.14084  | 2.46457  | -0.87352 |
| H | 4.76777  | 0.26856  | -1.54150 |
| H | 5.60045  | -1.73870 | -0.04380 |
| H | 7.33755  | -0.75410 | 1.71400  |
| H | 8.10694  | -0.58876 | 0.13483  |
| C | -3.46837 | -4.06762 | -0.11387 |
| H | -4.22281 | -4.11710 | -0.92107 |
| H | -3.04934 | -5.07078 | 0.01550  |
| O | -4.04812 | -3.67525 | 1.09828  |

M06/lanl2dz-6-31G(d) Energy = -2646.112669

M06/lanl2dz-6-31G(d) Free Energy = -2645.472837

M06/def2-TZVP Derived free energy = -2646.584630

M06/def2-TZVP Derived free energy in solution (toluene) = -2646.616379

M06/def2-TZVP Derived free energy in solution (nitromethane) = -2646.642697

Number of Imaginary Frequencies = 1 (-368.92)

M06/lanl2dz-6-31G(d) Geometry

|   |          |          |          |
|---|----------|----------|----------|
| C | 1.35656  | 2.70186  | -1.18096 |
| C | 1.41126  | 3.88124  | -2.17797 |
| C | 0.33237  | 1.49036  | -3.11527 |
| N | 0.90114  | 1.48561  | -1.86197 |
| C | 0.86750  | 0.21887  | -1.37838 |
| N | 0.27103  | -0.46545 | -2.36575 |
| N | -0.06486 | 0.30223  | -3.45669 |
| C | 1.26713  | 5.11315  | -1.28953 |
| C | 0.42354  | 4.61429  | -0.14813 |
| C | 0.44282  | 3.21977  | -0.09965 |
| C | -0.26119 | 2.52749  | 0.87314  |
| C | -0.98917 | 3.25166  | 1.81597  |
| C | -1.00929 | 4.64524  | 1.77291  |
| C | -0.30329 | 5.33540  | 0.78874  |
| C | -0.05141 | -1.85334 | -2.33012 |
| C | -1.41822 | -2.24252 | -2.25087 |
| C | -1.70841 | -3.62797 | -2.08772 |
| C | -0.64523 | -4.56138 | -2.02517 |

---

|    |          |          |          |
|----|----------|----------|----------|
| C  | 0.65813  | -4.16273 | -2.13812 |
| C  | 0.95415  | -2.79347 | -2.29927 |
| C  | -2.49461 | -1.32477 | -2.31653 |
| C  | -3.79318 | -1.76769 | -2.22886 |
| C  | -4.08229 | -3.13716 | -2.05537 |
| C  | -3.05605 | -4.04606 | -1.98575 |
| H  | 2.36081  | 2.49360  | -0.77890 |
| H  | 2.33193  | 3.86926  | -2.78665 |
| H  | 0.81503  | 5.93842  | -1.85287 |
| H  | 2.25399  | 5.45152  | -0.94051 |
| H  | -0.24621 | 1.43791  | 0.90260  |
| H  | -1.53506 | 2.72392  | 2.59860  |
| H  | -1.57743 | 5.20050  | 2.51694  |
| H  | -0.32747 | 6.42361  | 0.75388  |
| H  | -0.88196 | -5.61655 | -1.89424 |
| H  | 1.47672  | -4.87702 | -2.10716 |
| Cl | 2.62490  | -2.34071 | -2.44893 |
| H  | -2.29061 | -0.26706 | -2.47107 |
| H  | -4.61355 | -1.05459 | -2.31303 |
| H  | -5.11616 | -3.47135 | -1.99433 |
| H  | -3.26116 | -5.10883 | -1.86093 |
| Au | 1.59216  | -0.59918 | 0.51626  |
| C  | 2.24662  | -1.22636 | 2.35277  |
| C  | 3.54170  | -0.80628 | 2.69968  |
| C  | 1.47607  | -1.96954 | 3.23058  |
| C  | 4.04164  | -1.12443 | 3.96000  |
| C  | 1.99187  | -2.28568 | 4.49107  |
| H  | 0.48602  | -2.32022 | 2.94279  |
| C  | 3.26433  | -1.85875 | 4.85214  |
| H  | 5.04308  | -0.80860 | 4.25162  |
| H  | 1.39502  | -2.87312 | 5.18682  |
| H  | 3.66186  | -2.10643 | 5.83453  |
| C  | 3.52494  | 0.06352  | 0.44113  |
| C  | 4.11189  | 0.59861  | -0.69353 |
| C  | 4.25193  | -0.10539 | 1.63309  |
| C  | 5.44115  | 1.02893  | -0.63705 |

---

|   |          |          |          |
|---|----------|----------|----------|
| H | 3.56534  | 0.66136  | -1.63440 |
| C | 5.57323  | 0.33837  | 1.67101  |
| C | 6.16004  | 0.90968  | 0.54592  |
| H | 5.91043  | 1.44743  | -1.52571 |
| H | 6.15752  | 0.22015  | 2.58299  |
| H | 7.19383  | 1.24652  | 0.58967  |
| O | -0.42085 | -1.52554 | 0.69199  |
| C | -2.71673 | -1.36938 | 1.16477  |
| C | -1.37563 | -1.00744 | 1.32833  |
| C | -5.08936 | -0.85739 | 1.64697  |
| C | -3.71255 | -0.66497 | 1.81417  |
| C | -6.07503 | -0.20725 | 2.41390  |
| H | -1.16295 | -0.20372 | 2.06644  |
| H | -3.40110 | 0.11060  | 2.52528  |
| H | -2.96196 | -2.16386 | 0.45843  |
| C | -7.41697 | -0.87144 | 2.58063  |
| H | -5.71098 | 0.29494  | 3.31363  |
| H | -5.40458 | -1.60006 | 0.90709  |
| H | -7.81485 | -1.22678 | 1.62071  |
| H | -7.31292 | -1.74763 | 3.23442  |
| H | -8.15979 | -0.20886 | 3.03802  |
| C | -6.61946 | 1.45171  | 1.38703  |
| C | -5.58012 | 2.34363  | 1.67823  |
| C | -4.52675 | 2.15792  | 0.75794  |
| C | -4.92960 | 1.24831  | -0.18864 |
| C | -6.38464 | 0.98806  | -0.02960 |
| H | -7.62473 | 1.59430  | 1.78118  |
| H | -5.54639 | 2.99522  | 2.54812  |
| H | -3.54195 | 2.61561  | 0.82098  |
| H | -4.31605 | 0.86601  | -1.00050 |
| H | -6.93276 | 1.68090  | -0.69412 |
| H | -6.72152 | -0.02256 | -0.28202 |
| C | 0.28135  | 2.75572  | -3.89992 |
| H | 1.14660  | 2.79819  | -4.58724 |
| H | -0.62963 | 2.79697  | -4.50543 |
| O | 0.27736  | 3.85140  | -3.02571 |

---

Bottom, towards, 1, exo, away

M06/lanl2dz-6-31G(d) Energy = -2646.115312

M06/lanl2dz-6-31G(d) Free Energy = -2645.478520

M06/def2-TZVP Derived free energy = -2646.588861

M06/def2-TZVP Derived free energy in solution (toluene) = -2646.620766

M06/def2-TZVP Derived free energy in solution (nitromethane) = -2646.646888

Number of Imaginary Frequencies = 1 (-374.34)

M06/lanl2dz-6-31G(d) Geometry

|   |          |          |          |
|---|----------|----------|----------|
| C | 0.94570  | -0.23501 | 3.19821  |
| C | 0.44926  | 0.34432  | 4.53929  |
| C | 1.34821  | 2.21545  | 2.74877  |
| N | 1.21239  | 0.91753  | 2.30111  |
| C | 1.39697  | 0.91371  | 0.95722  |
| N | 1.61599  | 2.20154  | 0.67191  |
| N | 1.59352  | 3.02929  | 1.76715  |
| C | -1.06302 | 0.56013  | 4.32549  |
| C | -1.39639 | -0.56516 | 3.38807  |
| C | -0.23996 | -1.05003 | 2.76538  |
| C | -0.28029 | -2.17337 | 1.94653  |
| C | -1.51370 | -2.77456 | 1.69812  |
| C | -2.67401 | -2.26994 | 2.28638  |
| C | -2.62272 | -1.17230 | 3.14617  |
| C | 1.86392  | 2.75247  | -0.62081 |
| C | 0.80175  | 3.40373  | -1.30189 |
| C | 1.07211  | 3.96063  | -2.58518 |
| C | 2.37376  | 3.84511  | -3.12935 |
| C | 3.38196  | 3.21632  | -2.44797 |
| C | 3.12253  | 2.67115  | -1.17416 |
| C | -0.50153 | 3.51580  | -0.76482 |
| C | -1.48840 | 4.15887  | -1.46921 |
| C | -1.22372 | 4.71601  | -2.73899 |
| C | 0.03086  | 4.61531  | -3.28390 |
| H | 1.87907  | -0.80443 | 3.29070  |

---

|    |          |          |          |
|----|----------|----------|----------|
| H  | 0.58457  | -0.43945 | 5.29529  |
| H  | -1.27181 | 1.53942  | 3.86624  |
| H  | -1.62145 | 0.52837  | 5.26851  |
| H  | 0.63381  | -2.59356 | 1.52632  |
| H  | -1.56249 | -3.65518 | 1.06008  |
| H  | -3.62866 | -2.76180 | 2.10104  |
| H  | -3.52649 | -0.81346 | 3.63892  |
| H  | 2.56856  | 4.27287  | -4.11222 |
| H  | 4.38296  | 3.13205  | -2.86313 |
| Cl | 4.42769  | 1.91352  | -0.31733 |
| H  | -0.71894 | 3.08767  | 0.21299  |
| H  | -2.48657 | 4.24188  | -1.04147 |
| H  | -2.01657 | 5.22744  | -3.28087 |
| H  | 0.24783  | 5.04026  | -4.26340 |
| Au | 1.28012  | -0.67268 | -0.50440 |
| C  | 1.14107  | -2.22889 | -1.82921 |
| C  | 2.10904  | -3.23528 | -1.67249 |
| C  | 0.15686  | -2.33004 | -2.79837 |
| C  | 2.06707  | -4.35253 | -2.50399 |
| C  | 0.12687  | -3.45522 | -3.62739 |
| H  | -0.57909 | -1.53695 | -2.92509 |
| C  | 1.07708  | -4.45897 | -3.47744 |
| H  | 2.80981  | -5.14357 | -2.40201 |
| H  | -0.63889 | -3.54156 | -4.39684 |
| H  | 1.05273  | -5.33264 | -4.12615 |
| C  | 2.92283  | -1.75175 | 0.06376  |
| C  | 3.79676  | -1.35652 | 1.06337  |
| C  | 3.09117  | -2.96842 | -0.62361 |
| C  | 4.86509  | -2.19116 | 1.40407  |
| H  | 3.68020  | -0.39737 | 1.56858  |
| C  | 4.16210  | -3.78649 | -0.26539 |
| C  | 5.04030  | -3.40088 | 0.74294  |
| H  | 5.55997  | -1.88530 | 2.18408  |
| H  | 4.31741  | -4.73395 | -0.78087 |
| H  | 5.87341  | -4.04848 | 1.00892  |
| O  | -0.55352 | 0.33693  | -1.26495 |

---

|   |          |          |          |
|---|----------|----------|----------|
| C | -2.86827 | 0.71770  | -1.02539 |
| C | -1.63799 | 0.15263  | -0.65441 |
| C | -5.29555 | 0.89454  | -0.48879 |
| C | -3.99113 | 0.42765  | -0.27539 |
| C | -6.34218 | 0.69061  | 0.42962  |
| H | -1.64850 | -0.50197 | 0.24016  |
| H | -3.84261 | -0.21826 | 0.60028  |
| H | -2.90923 | 1.36815  | -1.90001 |
| C | -7.47918 | 1.67812  | 0.46746  |
| H | -6.03258 | 0.32310  | 1.41205  |
| H | -5.48304 | 1.51478  | -1.36945 |
| H | -7.87267 | 1.87824  | -0.53797 |
| H | -8.30812 | 1.34137  | 1.09955  |
| H | -7.12393 | 2.63464  | 0.87384  |
| C | -7.34412 | -0.97164 | -0.16365 |
| C | -6.49546 | -2.01019 | 0.23641  |
| C | -5.53937 | -2.25235 | -0.77246 |
| C | -5.84110 | -1.46933 | -1.86065 |
| C | -7.17598 | -0.84927 | -1.65751 |
| H | -8.30466 | -0.79587 | 0.31900  |
| H | -6.50748 | -2.47968 | 1.21762  |
| H | -4.67701 | -2.90815 | -0.68616 |
| H | -5.26920 | -1.41171 | -2.78265 |
| H | -7.31290 | 0.14672  | -2.09021 |
| H | -7.93137 | -1.50543 | -2.12747 |
| O | 1.20269  | 1.43248  | 4.99943  |
| C | 1.16262  | 2.57318  | 4.18347  |
| H | 0.21650  | 3.12871  | 4.30474  |
| H | 1.96964  | 3.23675  | 4.51237  |

M06/lanl2dz-6-31G(d) Energy = -2646.117956

M06/lanl2dz-6-31G(d) Free Energy = -2645.479615

M06/def2-TZVP Derived free energy = -2646.588656

M06/def2-TZVP Derived free energy in solution (toluene) = -2646.619839

M06/def2-TZVP Derived free energy in solution (nitromethane) = -2646.644561

Number of Imaginary Frequencies = 1 (-366.91)



---

M06/lanl2dz-6-31G(d) Geometry

|   |          |          |          |
|---|----------|----------|----------|
| C | -3.49880 | -1.18651 | 1.45788  |
| C | -4.08767 | -2.34356 | 2.28971  |
| C | -2.62234 | -3.13772 | 0.11606  |
| N | -2.59709 | -1.80006 | 0.44873  |
| C | -1.63166 | -1.19941 | -0.28815 |
| N | -1.12376 | -2.20409 | -1.01103 |
| N | -1.72410 | -3.41785 | -0.77977 |
| C | -3.01398 | -2.62729 | 3.35964  |
| C | -2.43835 | -1.25658 | 3.57800  |
| C | -2.74945 | -0.41371 | 2.50508  |
| C | -2.42229 | 0.93732  | 2.53265  |
| C | -1.70493 | 1.42767  | 3.62294  |
| C | -1.35953 | 0.58147  | 4.67723  |
| C | -1.73819 | -0.76077 | 4.67105  |
| C | -0.05897 | -2.11752 | -1.95588 |
| C | 1.24055  | -2.53893 | -1.56648 |
| C | 2.28902  | -2.45553 | -2.52671 |
| C | 2.00245  | -1.96319 | -3.82325 |
| C | 0.73886  | -1.57002 | -4.17563 |
| C | -0.30401 | -1.65554 | -3.23001 |
| C | 1.53195  | -3.03009 | -0.27157 |
| C | 2.80570  | -3.42486 | 0.05225  |
| C | 3.84500  | -3.35610 | -0.90123 |
| C | 3.59094  | -2.87656 | -2.16198 |
| H | -4.25858 | -0.60939 | 0.91580  |
| H | -4.98363 | -1.95426 | 2.78911  |
| H | -2.24843 | -3.32695 | 2.98798  |
| H | -3.44031 | -3.07628 | 4.26447  |
| H | -2.74265 | 1.60933  | 1.73697  |
| H | -1.43366 | 2.48142  | 3.65631  |
| H | -0.81411 | 0.98140  | 5.53023  |
| H | -1.50418 | -1.40314 | 5.51906  |
| H | 2.80968  | -1.90751 | -4.55299 |
| H | 0.51552  | -1.20140 | -5.17360 |

---

|    |          |          |          |
|----|----------|----------|----------|
| Cl | -1.90126 | -1.18823 | -3.71628 |
| H  | 0.73671  | -3.09376 | 0.46893  |
| H  | 3.01727  | -3.79623 | 1.05343  |
| H  | 4.84526  | -3.69443 | -0.63368 |
| H  | 4.38188  | -2.82541 | -2.91036 |
| Au | -0.90058 | 0.82602  | -0.26680 |
| C  | -0.23215 | 2.76309  | -0.18626 |
| C  | -1.15078 | 3.72771  | -0.63427 |
| C  | 1.01092  | 3.13825  | 0.29949  |
| C  | -0.79722 | 5.07541  | -0.58994 |
| C  | 1.35342  | 4.49313  | 0.33982  |
| H  | 1.72095  | 2.38528  | 0.64700  |
| C  | 0.45155  | 5.45383  | -0.10500 |
| H  | -1.49398 | 5.83900  | -0.93551 |
| H  | 2.32827  | 4.79757  | 0.72095  |
| H  | 0.72051  | 6.50800  | -0.07446 |
| C  | -2.52423 | 1.77547  | -1.06366 |
| C  | -3.66538 | 1.12091  | -1.49697 |
| C  | -2.41780 | 3.17810  | -1.11566 |
| C  | -4.73785 | 1.86930  | -1.98992 |
| H  | -3.73159 | 0.03340  | -1.47624 |
| C  | -3.49973 | 3.90599  | -1.60988 |
| C  | -4.65159 | 3.25527  | -2.04197 |
| H  | -5.63653 | 1.36153  | -2.33538 |
| H  | -3.44471 | 4.99303  | -1.66158 |
| H  | -5.48733 | 3.83745  | -2.42501 |
| O  | 0.98159  | 0.01594  | 0.51323  |
| C  | 2.56857  | -0.31792 | 2.20410  |
| C  | 1.26634  | -0.08324 | 1.74256  |
| C  | 4.96713  | -0.60701 | 1.59765  |
| C  | 3.61466  | -0.43301 | 1.29774  |
| C  | 5.95362  | -0.83197 | 0.61721  |
| H  | 0.46049  | 0.03700  | 2.49047  |
| H  | 3.33656  | -0.40746 | 0.23840  |
| H  | 2.74332  | -0.37826 | 3.27745  |
| C  | 7.22357  | -1.53617 | 1.01610  |

---

|   |          |          |          |
|---|----------|----------|----------|
| H | 5.57010  | -1.11919 | -0.36598 |
| H | 5.26996  | -0.59986 | 2.64910  |
| H | 7.98313  | -1.51396 | 0.22705  |
| H | 7.65832  | -1.10205 | 1.92640  |
| H | 7.00579  | -2.59156 | 1.23252  |
| C | 6.69664  | 0.98791  | 0.10717  |
| C | 5.73830  | 1.45392  | -0.79992 |
| C | 4.71076  | 2.12545  | -0.10249 |
| C | 5.06048  | 2.19980  | 1.22347  |
| C | 6.47127  | 1.75811  | 1.38441  |
| H | 7.69552  | 0.69471  | -0.21293 |
| H | 5.73042  | 1.23522  | -1.86497 |
| H | 3.77630  | 2.47518  | -0.53560 |
| H | 4.45099  | 2.62066  | 2.01967  |
| H | 7.11679  | 2.65468  | 1.34659  |
| H | 6.70697  | 1.24212  | 2.32034  |
| C | -3.54392 | -4.09599 | 0.79178  |
| H | -4.04985 | -4.71988 | 0.04686  |
| H | -2.95630 | -4.77239 | 1.43642  |
| O | -4.53886 | -3.42200 | 1.51456  |

Top, away, 2, exo, towards

M06/lanl2dz-6-31G(d) Energy = -2646.115119

M06/lanl2dz-6-31G(d) Free Energy = -2645.475567

M06/def2-TZVP Derived free energy = -2646.585845

M06/def2-TZVP Derived free energy in solution (toluene) = -2646.617329

M06/def2-TZVP Derived free energy in solution (nitromethane) = -2646.643237

Number of Imaginary Frequencies = 1 (-374.53)

M06/lanl2dz-6-31G(d) Geometry

|   |          |          |         |
|---|----------|----------|---------|
| C | 1.57310  | -1.16128 | 1.85913 |
| C | 2.88868  | -0.98519 | 2.64320 |
| C | 1.40505  | 1.31335  | 2.19495 |
| N | 0.97694  | 0.15263  | 1.59850 |
| C | -0.02120 | 0.45190  | 0.73390 |

---

|    |          |          |          |
|----|----------|----------|----------|
| N  | -0.13253 | 1.78518  | 0.85046  |
| N  | 0.74928  | 2.34307  | 1.74869  |
| C  | 3.07151  | -2.32575 | 3.34751  |
| C  | 1.65454  | -2.77937 | 3.57666  |
| C  | 0.77654  | -2.08792 | 2.74043  |
| C  | -0.58871 | -2.33339 | 2.76916  |
| C  | -1.07184 | -3.29063 | 3.65972  |
| C  | -0.19849 | -3.98565 | 4.49389  |
| C  | 1.17206  | -3.73538 | 4.45822  |
| C  | -1.01061 | 2.62596  | 0.10658  |
| C  | -2.09634 | 3.25962  | 0.77002  |
| C  | -3.01142 | 4.01585  | -0.01770 |
| C  | -2.79524 | 4.13763  | -1.41070 |
| C  | -1.71790 | 3.55141  | -2.02108 |
| C  | -0.81906 | 2.79322  | -1.24753 |
| C  | -2.31556 | 3.15312  | 2.16470  |
| C  | -3.40263 | 3.75999  | 2.74394  |
| C  | -4.31813 | 4.49948  | 1.96403  |
| C  | -4.12220 | 4.62549  | 0.61286  |
| H  | 1.77086  | -1.60855 | 0.87243  |
| H  | 3.72888  | -0.69936 | 1.98087  |
| H  | 3.65551  | -2.19738 | 4.26707  |
| H  | 3.62091  | -3.02546 | 2.69970  |
| H  | -1.27915 | -1.78915 | 2.12259  |
| H  | -2.13973 | -3.49432 | 3.70356  |
| H  | -0.59220 | -4.72710 | 5.18647  |
| H  | 1.84930  | -4.27388 | 5.11984  |
| H  | -3.50206 | 4.71951  | -2.00097 |
| H  | -1.54133 | 3.65740  | -3.08822 |
| Cl | 0.55638  | 2.07983  | -2.05093 |
| H  | -1.60706 | 2.59903  | 2.77770  |
| H  | -3.55624 | 3.67642  | 3.81809  |
| H  | -5.17252 | 4.97490  | 2.44091  |
| H  | -4.81611 | 5.20046  | 0.00070  |
| Au | -1.00320 | -0.94177 | -0.63424 |
| C  | -1.92633 | -2.21325 | -1.95469 |

---

|   |          |          |          |
|---|----------|----------|----------|
| C | -3.32913 | -2.12688 | -1.98238 |
| C | -1.25389 | -3.09829 | -2.78098 |
| C | -4.04080 | -2.90623 | -2.89093 |
| C | -1.98018 | -3.88214 | -3.68297 |
| H | -0.17160 | -3.20872 | -2.72516 |
| C | -3.36438 | -3.77483 | -3.74336 |
| H | -5.12828 | -2.84935 | -2.93152 |
| H | -1.45727 | -4.58064 | -4.33390 |
| H | -3.92640 | -4.38339 | -4.44915 |
| C | -2.95690 | -0.62560 | -0.12454 |
| C | -3.34550 | 0.16227  | 0.94236  |
| C | -3.89614 | -1.24103 | -0.97016 |
| C | -4.70675 | 0.39480  | 1.15819  |
| H | -2.61513 | 0.60609  | 1.61549  |
| C | -5.24894 | -0.99931 | -0.73664 |
| C | -5.64968 | -0.17876 | 0.31457  |
| H | -5.01373 | 1.02887  | 1.98884  |
| H | -5.99988 | -1.46285 | -1.37584 |
| H | -6.70984 | 0.00268  | 0.48075  |
| O | 1.10186  | -1.30186 | -1.31021 |
| C | 2.73314  | -0.71551 | -2.91654 |
| C | 1.43213  | -1.04426 | -2.50339 |
| C | 5.08919  | -0.22669 | -2.30771 |
| C | 3.76826  | -0.57591 | -2.00852 |
| C | 6.13516  | -0.25072 | -1.36595 |
| H | 0.64811  | -1.07146 | -3.28175 |
| H | 3.52831  | -0.77982 | -0.95842 |
| H | 2.90555  | -0.55022 | -3.97951 |
| C | 7.54779  | -0.42625 | -1.85763 |
| H | 5.91408  | -0.77768 | -0.43391 |
| H | 5.33090  | 0.01776  | -3.34613 |
| H | 8.29078  | -0.27048 | -1.06788 |
| H | 7.67993  | -1.44880 | -2.23585 |
| H | 7.77488  | 0.25812  | -2.68576 |
| C | 6.25790  | 1.61809  | -0.58032 |
| C | 5.19023  | 1.63610  | 0.32360  |

---

|   |         |          |          |
|---|---------|----------|----------|
| C | 4.01065 | 2.03552  | -0.34174 |
| C | 4.33670 | 2.39514  | -1.62753 |
| C | 5.81566 | 2.44416  | -1.76107 |
| H | 7.29435 | 1.60670  | -0.24620 |
| H | 5.25291 | 1.28400  | 1.35206  |
| H | 3.00027 | 2.02199  | 0.06787  |
| H | 3.63805 | 2.71868  | -2.39489 |
| H | 6.21746 | 2.16489  | -2.73995 |
| H | 6.13957 | 3.48437  | -1.57289 |
| O | 2.72724 | -0.00962 | 3.65714  |
| C | 2.53396 | 1.28601  | 3.16811  |
| H | 3.44633 | 1.67281  | 2.67431  |
| H | 2.32173 | 1.93947  | 4.02091  |

M06/lanl2dz-6-31G(d) Energy = -2646.114936

M06/lanl2dz-6-31G(d) Free Energy = -2645.476607

M06/def2-TZVP Derived free energy = -2646.586391

M06/def2-TZVP Derived free energy in solution (toluene) = -2646.616693

M06/def2-TZVP Derived free energy in solution (nitromethane) = -2646.641241

Number of Imaginary Frequencies = 1 (-367.41)

M06/lanl2dz-6-31G(d) Geometry

|   |          |          |         |
|---|----------|----------|---------|
| C | -1.06036 | -0.63265 | 3.24803 |
| C | -1.71816 | -0.19024 | 4.56551 |
| C | -0.92654 | 1.86663  | 2.94094 |
| N | -0.92218 | 0.59444  | 2.41554 |
| C | -0.75578 | 0.68672  | 1.07526 |
| N | -0.65692 | 2.00848  | 0.86800 |
| N | -0.76028 | 2.76203  | 2.01377 |
| C | -3.22260 | -0.12825 | 4.22827 |
| C | -3.34657 | -1.23535 | 3.21638 |
| C | -2.09062 | -1.57113 | 2.69830 |
| C | -1.92627 | -2.64927 | 1.83734 |
| C | -3.05969 | -3.34716 | 1.42420 |
| C | -4.31953 | -2.98393 | 1.89717 |
| C | -4.47100 | -1.94318 | 2.81352 |

---

|    |          |          |          |
|----|----------|----------|----------|
| C  | -0.45634 | 2.66004  | -0.38411 |
| C  | -1.53583 | 3.37565  | -0.97137 |
| C  | -1.33560 | 3.96028  | -2.25586 |
| C  | -0.07364 | 3.83934  | -2.88378 |
| C  | 0.96485  | 3.18247  | -2.27852 |
| C  | 0.76665  | 2.59446  | -1.01484 |
| C  | -2.79259 | 3.53065  | -0.33905 |
| C  | -3.80591 | 4.21320  | -0.96459 |
| C  | -3.61703 | 4.77311  | -2.24592 |
| C  | -2.40422 | 4.65179  | -2.87377 |
| H  | -0.05754 | -1.05730 | 3.37434  |
| H  | -1.55796 | -0.99644 | 5.29226  |
| H  | -3.50247 | 0.84665  | 3.79667  |
| H  | -3.85098 | -0.27112 | 5.11536  |
| H  | -0.93323 | -2.95907 | 1.50728  |
| H  | -2.95615 | -4.18073 | 0.73187  |
| H  | -5.19566 | -3.54060 | 1.56999  |
| H  | -5.45463 | -1.70124 | 3.21409  |
| H  | 0.06778  | 4.29064  | -3.86523 |
| H  | 1.94003  | 3.10467  | -2.75241 |
| Cl | 2.12136  | 1.79435  | -0.25820 |
| H  | -2.94424 | 3.12585  | 0.65953  |
| H  | -4.76532 | 4.33081  | -0.46399 |
| H  | -4.43255 | 5.30773  | -2.72796 |
| H  | -2.24103 | 5.08896  | -3.85827 |
| Au | -0.64620 | -0.93602 | -0.35566 |
| C  | -0.53421 | -2.43713 | -1.75266 |
| C  | -1.55721 | -2.42968 | -2.71773 |
| C  | 0.45393  | -3.40804 | -1.77796 |
| C  | -1.54257 | -3.38294 | -3.73346 |
| C  | 0.45508  | -4.36388 | -2.79875 |
| H  | 1.22197  | -3.44692 | -1.00565 |
| C  | -0.53295 | -4.34089 | -3.77602 |
| H  | -2.32464 | -3.39110 | -4.49235 |
| H  | 1.22993  | -5.12837 | -2.82387 |
| H  | -0.52779 | -5.08338 | -4.57180 |

---

|   |          |          |          |
|---|----------|----------|----------|
| C | -2.39936 | -0.62125 | -1.34924 |
| C | -3.36283 | 0.27132  | -0.91818 |
| C | -2.59327 | -1.42564 | -2.48609 |
| C | -4.53044 | 0.42686  | -1.67020 |
| H | -3.22921 | 0.84600  | -0.00294 |
| C | -3.76270 | -1.25243 | -3.22462 |
| C | -4.71908 | -0.32309 | -2.82421 |
| H | -5.28606 | 1.14047  | -1.34518 |
| H | -3.94028 | -1.86023 | -4.11150 |
| H | -5.62701 | -0.19802 | -3.41106 |
| O | 1.22526  | -1.45273 | 0.75685  |
| C | 3.57232  | -1.29413 | 0.89739  |
| C | 2.35183  | -1.31545 | 0.20979  |
| C | 6.04459  | -1.13061 | 0.74927  |
| C | 4.75735  | -1.14844 | 0.19924  |
| C | 7.22446  | -1.18252 | -0.01684 |
| H | 2.40231  | -1.20527 | -0.89223 |
| H | 4.68659  | -1.06944 | -0.89313 |
| H | 3.56641  | -1.39958 | 1.98269  |
| C | 8.46400  | -1.76591 | 0.61033  |
| H | 7.08927  | -1.44398 | -1.06916 |
| H | 6.13250  | -1.16728 | 1.83869  |
| H | 9.35826  | -1.61102 | -0.00294 |
| H | 8.64957  | -1.34133 | 1.60601  |
| H | 8.33605  | -2.84938 | 0.73637  |
| C | 7.84203  | 0.72905  | -0.29828 |
| C | 6.99352  | 1.17025  | -1.31944 |
| C | 5.80243  | 1.67780  | -0.75686 |
| C | 5.92974  | 1.68352  | 0.61019  |
| C | 7.33781  | 1.37073  | 0.96991  |
| H | 8.90388  | 0.55613  | -0.46759 |
| H | 7.17779  | 1.03803  | -2.38294 |
| H | 4.91300  | 1.96675  | -1.31067 |
| H | 5.16767  | 1.99323  | 1.32071  |
| H | 7.87857  | 2.32731  | 1.09122  |
| H | 7.48092  | 0.81181  | 1.89983  |



---

|   |          |         |         |
|---|----------|---------|---------|
| O | -1.11959 | 0.94265 | 5.14147 |
| C | -1.20515 | 2.11894 | 4.38469 |
| H | -2.19903 | 2.59109 | 4.47768 |
| H | -0.47496 | 2.82547 | 4.79494 |

Bottom, away, 2, exo, toward

M06/lanl2dz-6-31G(d) Energy = -2646.118224

M06/lanl2dz-6-31G(d) Free Energy = -2645.480488

M06/def2-TZVP Derived free energy = -2646.590631

M06/def2-TZVP Derived free energy in solution (toluene) = -2646.621333

M06/def2-TZVP Derived free energy in solution (nitromethane) = -2646.645687

Number of Imaginary Frequencies = 1 (-400.64)

M06/lanl2dz-6-31G(d) Geometry

|   |          |          |          |
|---|----------|----------|----------|
| C | -3.21985 | -0.60917 | -2.51547 |
| C | -4.75973 | -0.81633 | -2.38713 |
| C | -2.98466 | -2.76521 | -1.36835 |
| N | -2.55670 | -1.46335 | -1.50904 |
| C | -1.49348 | -1.26974 | -0.70064 |
| N | -1.31807 | -2.47828 | -0.14120 |
| N | -2.24000 | -3.42235 | -0.53245 |
| C | -5.25591 | 0.36484  | -1.54496 |
| C | -4.19733 | 1.41016  | -1.74236 |
| C | -3.04672 | 0.86048  | -2.30816 |
| C | -1.93490 | 1.64283  | -2.60663 |
| C | -1.97926 | 3.00083  | -2.30120 |
| C | -3.11823 | 3.55141  | -1.71169 |
| C | -4.23361 | 2.76472  | -1.43233 |
| C | -0.20139 | -2.86689 | 0.65671  |
| C | -0.24138 | -2.70013 | 2.06572  |
| C | 0.91430  | -3.06450 | 2.81843  |
| C | 2.03550  | -3.60656 | 2.14435  |
| C | 2.03995  | -3.77820 | 0.78397  |
| C | 0.90925  | -3.39409 | 0.03411  |
| C | -1.37038 | -2.18496 | 2.74357  |

---

|    |          |          |          |
|----|----------|----------|----------|
| C  | -1.34309 | -2.01333 | 4.10454  |
| C  | -0.19749 | -2.36167 | 4.85213  |
| C  | 0.90417  | -2.88173 | 4.22152  |
| H  | -2.84357 | -0.95476 | -3.48913 |
| H  | -5.17341 | -0.76220 | -3.40913 |
| H  | -5.31819 | 0.05096  | -0.49067 |
| H  | -6.25938 | 0.69405  | -1.84032 |
| H  | -1.04778 | 1.20283  | -3.06691 |
| H  | -1.12065 | 3.63320  | -2.51890 |
| H  | -3.13627 | 4.61287  | -1.47170 |
| H  | -5.12194 | 3.20679  | -0.98279 |
| H  | 2.90567  | -3.89963 | 2.73159  |
| H  | 2.89536  | -4.20527 | 0.26518  |
| Cl | 0.96023  | -3.56712 | -1.69230 |
| H  | -2.26146 | -1.92262 | 2.17791  |
| H  | -2.21616 | -1.60552 | 4.61049  |
| H  | -0.19492 | -2.22254 | 5.93097  |
| H  | 1.78903  | -3.16488 | 4.79086  |
| Au | -0.53246 | 0.55857  | -0.06358 |
| C  | 0.27523  | 2.32606  | 0.60154  |
| C  | -0.53847 | 3.05659  | 1.48400  |
| C  | 1.50017  | 2.82612  | 0.18874  |
| C  | -0.08812 | 4.28464  | 1.96565  |
| C  | 1.94157  | 4.05927  | 0.67936  |
| H  | 2.11337  | 2.27572  | -0.52602 |
| C  | 1.15066  | 4.77996  | 1.56707  |
| H  | -0.70250 | 4.86759  | 2.65161  |
| H  | 2.90449  | 4.45679  | 0.35776  |
| H  | 1.49613  | 5.73924  | 1.94796  |
| C  | -2.04510 | 1.18514  | 1.16174  |
| C  | -3.22151 | 0.48301  | 1.36363  |
| C  | -1.82000 | 2.42340  | 1.78923  |
| C  | -4.20728 | 1.01415  | 2.19978  |
| H  | -3.40375 | -0.47443 | 0.87339  |
| C  | -2.81921 | 2.94187  | 2.61314  |
| C  | -4.00488 | 2.24288  | 2.81668  |

---

|   |          |          |          |
|---|----------|----------|----------|
| H | -5.13300 | 0.46287  | 2.35965  |
| H | -2.67100 | 3.90386  | 3.10323  |
| H | -4.77267 | 2.66002  | 3.46537  |
| O | 1.26354  | 0.08133  | -1.28297 |
| C | 3.53322  | -0.53360 | -1.21133 |
| C | 2.23161  | -0.46252 | -0.69059 |
| C | 5.91081  | -1.09516 | -0.77443 |
| C | 4.54745  | -1.11050 | -0.46366 |
| C | 6.43380  | -0.40881 | -1.87769 |
| H | 2.07412  | -0.89850 | 0.31865  |
| H | 4.25186  | -1.58667 | 0.47652  |
| H | 3.69891  | -0.11406 | -2.20314 |
| C | 7.82195  | -0.71486 | -2.35851 |
| H | 5.73370  | -0.14906 | -2.67346 |
| H | 6.60379  | -1.59203 | -0.09435 |
| H | 8.24338  | 0.08142  | -2.98223 |
| H | 8.51299  | -0.91080 | -1.52930 |
| H | 7.79321  | -1.62486 | -2.97406 |
| C | 6.62529  | 1.56815  | -1.25160 |
| C | 5.33816  | 2.01576  | -0.94948 |
| C | 5.06692  | 1.79671  | 0.42838  |
| C | 6.19154  | 1.30819  | 1.02730  |
| C | 7.32781  | 1.36294  | 0.06870  |
| H | 7.15701  | 1.90335  | -2.14110 |
| H | 4.63376  | 2.43449  | -1.66576 |
| H | 4.10223  | 1.95568  | 0.90658  |
| H | 6.28903  | 1.02361  | 2.07098  |
| H | 7.92083  | 2.27033  | 0.28215  |
| H | 8.02754  | 0.52207  | 0.12454  |
| O | -5.14218 | -2.03334 | -1.78271 |
| C | -4.27011 | -3.11386 | -2.03175 |
| H | -4.70682 | -4.01318 | -1.58892 |
| H | -4.13391 | -3.28900 | -3.11366 |

M06/lanl2dz-6-31G(d) Energy = -2646.117014

M06/lanl2dz-6-31G(d) Free Energy = -2645.480715

---

M06/def2-TZVP Derived free energy = -2646.593025

M06/def2-TZVP Derived free energy in solution (toluene) = -2646.623504

M06/def2-TZVP Derived free energy in solution (nitromethane) = -2646.648284

Number of Imaginary Frequencies = 1 (-393.76)

M06/lanl2dz-6-31G(d) Geometry

|   |          |          |          |
|---|----------|----------|----------|
| C | -0.05937 | 3.03952  | 0.23877  |
| C | 0.25686  | 4.43773  | -0.33501 |
| C | -1.34766 | 2.78992  | -1.89525 |
| N | -0.81120 | 2.25677  | -0.74813 |
| C | -1.09170 | 0.93344  | -0.71373 |
| N | -1.78848 | 0.74050  | -1.84595 |
| N | -1.95717 | 1.88191  | -2.59613 |
| C | 0.43637  | 5.30715  | 0.90488  |
| C | -0.47301 | 4.65738  | 1.91202  |
| C | -0.79097 | 3.35608  | 1.51931  |
| C | -1.61768 | 2.55510  | 2.29468  |
| C | -2.12832 | 3.07727  | 3.48194  |
| C | -1.80851 | 4.37367  | 3.87944  |
| C | -0.97844 | 5.17348  | 3.09660  |
| C | -2.33899 | -0.49067 | -2.30752 |
| C | -3.75286 | -0.64770 | -2.33190 |
| C | -4.28008 | -1.91481 | -2.71713 |
| C | -3.39354 | -2.95615 | -3.07946 |
| C | -2.03691 | -2.77060 | -3.07866 |
| C | -1.51182 | -1.52188 | -2.69368 |
| C | -4.65083 | 0.38488  | -1.96713 |
| C | -6.00584 | 0.16326  | -1.97981 |
| C | -6.52988 | -1.09223 | -2.35608 |
| C | -5.68215 | -2.10690 | -2.71866 |
| H | 0.87103  | 2.48331  | 0.42961  |
| H | 1.13372  | 4.42222  | -1.00619 |
| H | 0.18339  | 6.35017  | 0.67819  |
| H | 1.48565  | 5.28620  | 1.23602  |
| H | -1.87812 | 1.54021  | 1.99121  |
| H | -2.78177 | 2.46587  | 4.10107  |

---

|    |          |          |          |
|----|----------|----------|----------|
| H  | -2.21643 | 4.76805  | 4.80827  |
| H  | -0.74015 | 6.19087  | 3.40441  |
| H  | -3.80957 | -3.91967 | -3.37129 |
| H  | -1.35408 | -3.56368 | -3.37184 |
| Cl | 0.21861  | -1.31569 | -2.74185 |
| H  | -4.26277 | 1.36348  | -1.69215 |
| H  | -6.68415 | 0.96787  | -1.70278 |
| H  | -7.60645 | -1.24813 | -2.36275 |
| H  | -6.07282 | -3.07922 | -3.01693 |
| Au | -0.31844 | -0.49977 | 0.73190  |
| C  | 0.42696  | -1.88326 | 2.05331  |
| C  | -0.52282 | -2.77152 | 2.58558  |
| C  | 1.76083  | -1.97396 | 2.41610  |
| C  | -0.10308 | -3.77827 | 3.45201  |
| C  | 2.16992  | -2.98321 | 3.29232  |
| H  | 2.48777  | -1.25527 | 2.03856  |
| C  | 1.24142  | -3.88548 | 3.79762  |
| H  | -0.82425 | -4.47945 | 3.87150  |
| H  | 3.21651  | -3.05672 | 3.58495  |
| H  | 1.56207  | -4.67242 | 4.47762  |
| C  | -2.06339 | -1.36468 | 1.35773  |
| C  | -3.31538 | -0.91989 | 0.97653  |
| C  | -1.89926 | -2.48493 | 2.19188  |
| C  | -4.44591 | -1.62819 | 1.39370  |
| H  | -3.43983 | -0.03378 | 0.35799  |
| C  | -3.03954 | -3.17674 | 2.59726  |
| C  | -4.30322 | -2.75538 | 2.19278  |
| H  | -5.43373 | -1.28744 | 1.08742  |
| H  | -2.94327 | -4.04925 | 3.24281  |
| H  | -5.18329 | -3.30893 | 2.51444  |
| O  | 1.70292  | 0.29126  | 0.13683  |
| C  | 3.72209  | -0.09946 | -1.02479 |
| C  | 2.49283  | -0.48276 | -0.46580 |
| C  | 5.76121  | -0.85589 | -2.24293 |
| C  | 4.49717  | -1.04818 | -1.67459 |
| C  | 6.45241  | 0.36014  | -2.19602 |

---

|   |          |          |          |
|---|----------|----------|----------|
| H | 2.22154  | -1.55229 | -0.56315 |
| H | 4.07647  | -2.05607 | -1.74048 |
| H | 4.01215  | 0.94862  | -0.95693 |
| C | 7.58170  | 0.61322  | -3.15192 |
| H | 5.86947  | 1.24805  | -1.94493 |
| H | 6.23904  | -1.70548 | -2.73227 |
| H | 8.21838  | 1.45170  | -2.84873 |
| H | 8.21386  | -0.27307 | -3.28812 |
| H | 7.16417  | 0.86398  | -4.13713 |
| C | 7.46838  | 0.35126  | -0.36832 |
| C | 6.46996  | 0.35234  | 0.60384  |
| C | 6.14826  | -0.98430 | 0.95865  |
| C | 6.98984  | -1.83279 | 0.29868  |
| C | 8.04289  | -1.04287 | -0.39381 |
| H | 8.07419  | 1.23097  | -0.57969 |
| H | 5.97725  | 1.23788  | 0.99830  |
| H | 5.33289  | -1.27700 | 1.61429  |
| H | 6.97773  | -2.91754 | 0.35052  |
| H | 8.95066  | -1.04565 | 0.23628  |
| H | 8.34995  | -1.42979 | -1.37120 |
| C | -1.14303 | 4.23248  | -2.20959 |
| H | -0.32001 | 4.33519  | -2.94134 |
| H | -2.04549 | 4.65955  | -2.65899 |
| O | -0.86701 | 4.94087  | -1.03391 |

M06/lanl2dz-6-31G(d) Energy = -2646.117014

M06/lanl2dz-6-31G(d) Free Energy = -2645.480715

M06/def2-TZVP Derived free energy = -2646.593025

M06/def2-TZVP Derived free energy in solution (toluene) = -2646.623504

M06/def2-TZVP Derived free energy in solution (nitromethane) = -2646.648284

Number of Imaginary Frequencies = 1 (-393.76)

M06/lanl2dz-6-31G(d) Geometry

|   |          |         |          |
|---|----------|---------|----------|
| C | -0.05937 | 3.03952 | 0.23877  |
| C | 0.25686  | 4.43773 | -0.33501 |
| C | -1.34766 | 2.78992 | -1.89525 |

---

|    |          |          |          |
|----|----------|----------|----------|
| N  | -0.81120 | 2.25677  | -0.74813 |
| C  | -1.09170 | 0.93344  | -0.71373 |
| N  | -1.78848 | 0.74050  | -1.84595 |
| N  | -1.95717 | 1.88191  | -2.59613 |
| C  | 0.43637  | 5.30715  | 0.90488  |
| C  | -0.47301 | 4.65738  | 1.91202  |
| C  | -0.79097 | 3.35608  | 1.51931  |
| C  | -1.61768 | 2.55510  | 2.29468  |
| C  | -2.12832 | 3.07727  | 3.48194  |
| C  | -1.80851 | 4.37367  | 3.87944  |
| C  | -0.97844 | 5.17348  | 3.09660  |
| C  | -2.33899 | -0.49067 | -2.30752 |
| C  | -3.75286 | -0.64770 | -2.33190 |
| C  | -4.28008 | -1.91481 | -2.71713 |
| C  | -3.39354 | -2.95615 | -3.07946 |
| C  | -2.03691 | -2.77060 | -3.07866 |
| C  | -1.51182 | -1.52188 | -2.69368 |
| C  | -4.65083 | 0.38488  | -1.96713 |
| C  | -6.00584 | 0.16326  | -1.97981 |
| C  | -6.52988 | -1.09223 | -2.35608 |
| C  | -5.68215 | -2.10690 | -2.71866 |
| H  | 0.87103  | 2.48331  | 0.42961  |
| H  | 1.13372  | 4.42222  | -1.00619 |
| H  | 0.18339  | 6.35017  | 0.67819  |
| H  | 1.48565  | 5.28620  | 1.23602  |
| H  | -1.87812 | 1.54021  | 1.99121  |
| H  | -2.78177 | 2.46587  | 4.10107  |
| H  | -2.21643 | 4.76805  | 4.80827  |
| H  | -0.74015 | 6.19087  | 3.40441  |
| H  | -3.80957 | -3.91967 | -3.37129 |
| H  | -1.35408 | -3.56368 | -3.37184 |
| Cl | 0.21861  | -1.31569 | -2.74185 |
| H  | -4.26277 | 1.36348  | -1.69215 |
| H  | -6.68415 | 0.96787  | -1.70278 |
| H  | -7.60645 | -1.24813 | -2.36275 |
| H  | -6.07282 | -3.07922 | -3.01693 |

---

|    |          |          |          |
|----|----------|----------|----------|
| Au | -0.31844 | -0.49977 | 0.73190  |
| C  | 0.42696  | -1.88326 | 2.05331  |
| C  | -0.52282 | -2.77152 | 2.58558  |
| C  | 1.76083  | -1.97396 | 2.41610  |
| C  | -0.10308 | -3.77827 | 3.45201  |
| C  | 2.16992  | -2.98321 | 3.29232  |
| H  | 2.48777  | -1.25527 | 2.03856  |
| C  | 1.24142  | -3.88548 | 3.79762  |
| H  | -0.82425 | -4.47945 | 3.87150  |
| H  | 3.21651  | -3.05672 | 3.58495  |
| H  | 1.56207  | -4.67242 | 4.47762  |
| C  | -2.06339 | -1.36468 | 1.35773  |
| C  | -3.31538 | -0.91989 | 0.97653  |
| C  | -1.89926 | -2.48493 | 2.19188  |
| C  | -4.44591 | -1.62819 | 1.39370  |
| H  | -3.43983 | -0.03378 | 0.35799  |
| C  | -3.03954 | -3.17674 | 2.59726  |
| C  | -4.30322 | -2.75538 | 2.19278  |
| H  | -5.43373 | -1.28744 | 1.08742  |
| H  | -2.94327 | -4.04925 | 3.24281  |
| H  | -5.18329 | -3.30893 | 2.51444  |
| O  | 1.70292  | 0.29126  | 0.13683  |
| C  | 3.72209  | -0.09946 | -1.02479 |
| C  | 2.49283  | -0.48276 | -0.46580 |
| C  | 5.76121  | -0.85589 | -2.24293 |
| C  | 4.49717  | -1.04818 | -1.67459 |
| C  | 6.45241  | 0.36014  | -2.19602 |
| H  | 2.22154  | -1.55229 | -0.56315 |
| H  | 4.07647  | -2.05607 | -1.74048 |
| H  | 4.01215  | 0.94862  | -0.95693 |
| C  | 7.58170  | 0.61322  | -3.15192 |
| H  | 5.86947  | 1.24805  | -1.94493 |
| H  | 6.23904  | -1.70548 | -2.73227 |
| H  | 8.21838  | 1.45170  | -2.84873 |
| H  | 8.21386  | -0.27307 | -3.28812 |
| H  | 7.16417  | 0.86398  | -4.13713 |



---

|   |          |          |          |
|---|----------|----------|----------|
| C | 7.46838  | 0.35126  | -0.36832 |
| C | 6.46996  | 0.35234  | 0.60384  |
| C | 6.14826  | -0.98430 | 0.95865  |
| C | 6.98984  | -1.83279 | 0.29868  |
| C | 8.04289  | -1.04287 | -0.39381 |
| H | 8.07419  | 1.23097  | -0.57969 |
| H | 5.97725  | 1.23788  | 0.99830  |
| H | 5.33289  | -1.27700 | 1.61429  |
| H | 6.97773  | -2.91754 | 0.35052  |
| H | 8.95066  | -1.04565 | 0.23628  |
| H | 8.34995  | -1.42979 | -1.37120 |
| C | -1.14303 | 4.23248  | -2.20959 |
| H | -0.32001 | 4.33519  | -2.94134 |
| H | -2.04549 | 4.65955  | -2.65899 |
| O | -0.86701 | 4.94087  | -1.03391 |

M06/lanl2dz-6-31G(d) Energy = -2646.116288

M06/lanl2dz-6-31G(d) Free Energy = -2645.476814

M06/def2-TZVP Derived free energy = -2646.586448

M06/def2-TZVP Derived free energy in solution (toluene) = -2646.616380

M06/def2-TZVP Derived free energy in solution (nitromethane) = -2646.639931

Number of Imaginary Frequencies = 1 (-389.34)

M06/lanl2dz-6-31G(d) Geometry

|   |          |         |          |
|---|----------|---------|----------|
| C | -0.21849 | 3.17171 | 0.53321  |
| C | -0.64936 | 4.65040 | 0.50416  |
| C | -1.86904 | 3.06347 | -1.36805 |
| N | -1.10843 | 2.43593 | -0.40811 |
| C | -1.29160 | 1.09702 | -0.52642 |
| N | -2.16066 | 0.99590 | -1.54640 |
| N | -2.52949 | 2.20487 | -2.08499 |
| C | -1.80927 | 4.73596 | 1.51486  |
| C | -1.40484 | 3.69407 | 2.51987  |
| C | -0.46776 | 2.81346 | 1.96888  |
| C | 0.13503  | 1.82783 | 2.74238  |
| C | -0.26469 | 1.68543 | 4.06932  |

---

|    |          |          |          |
|----|----------|----------|----------|
| C  | -1.22610 | 2.53765  | 4.61100  |
| C  | -1.78992 | 3.55813  | 3.84721  |
| C  | -2.72424 | -0.20022 | -2.08141 |
| C  | -4.11664 | -0.43794 | -1.90738 |
| C  | -4.65320 | -1.67044 | -2.38058 |
| C  | -3.79652 | -2.60463 | -3.00900 |
| C  | -2.46512 | -2.34148 | -3.19012 |
| C  | -1.93283 | -1.12158 | -2.72944 |
| C  | -4.97939 | 0.47394  | -1.25199 |
| C  | -6.30813 | 0.17428  | -1.08000 |
| C  | -6.84272 | -1.04236 | -1.55513 |
| C  | -6.02882 | -1.94357 | -2.19199 |
| H  | 0.80946  | 3.00695  | 0.19254  |
| H  | 0.19428  | 5.23243  | 0.89594  |
| H  | -2.77528 | 4.48711  | 1.04700  |
| H  | -1.91465 | 5.74181  | 1.93856  |
| H  | 0.93009  | 1.20397  | 2.33331  |
| H  | 0.19072  | 0.91702  | 4.69072  |
| H  | -1.52192 | 2.42024  | 5.65181  |
| H  | -2.50999 | 4.24541  | 4.28960  |
| H  | -4.21571 | -3.54677 | -3.36013 |
| H  | -1.80782 | -3.04961 | -3.68777 |
| Cl | -0.24636 | -0.80536 | -3.03393 |
| H  | -4.58681 | 1.42355  | -0.89475 |
| H  | -6.95911 | 0.88677  | -0.57729 |
| H  | -7.89934 | -1.25991 | -1.41498 |
| H  | -6.42588 | -2.88787 | -2.56320 |
| Au | -0.17925 | -0.46374 | 0.50673  |
| C  | 0.92880  | -1.92550 | 1.43250  |
| C  | 0.20403  | -3.05473 | 1.84890  |
| C  | 2.29337  | -1.83752 | 1.66166  |
| C  | 0.87990  | -4.11558 | 2.44878  |
| C  | 2.95889  | -2.90190 | 2.27820  |
| H  | 2.84750  | -0.93968 | 1.38352  |
| C  | 2.25465  | -4.04001 | 2.65514  |
| H  | 0.33452  | -5.00105 | 2.77465  |

---

|   |          |          |          |
|---|----------|----------|----------|
| H | 4.02953  | -2.83275 | 2.47213  |
| H | 2.77455  | -4.86885 | 3.13190  |
| C | -1.67473 | -1.71752 | 1.11671  |
| C | -3.01614 | -1.41178 | 0.99912  |
| C | -1.23968 | -2.93861 | 1.66179  |
| C | -3.96728 | -2.36431 | 1.37633  |
| H | -3.34545 | -0.44671 | 0.62260  |
| C | -2.20340 | -3.87600 | 2.02986  |
| C | -3.55826 | -3.59436 | 1.87573  |
| H | -5.02607 | -2.13112 | 1.27071  |
| H | -1.89553 | -4.83261 | 2.45142  |
| H | -4.29854 | -4.33775 | 2.16511  |
| O | 1.66211  | 0.71620  | -0.04374 |
| C | 3.74911  | 0.77391  | -1.13178 |
| C | 2.44342  | 0.29907  | -0.93979 |
| C | 5.86793  | 0.57086  | -2.41638 |
| C | 4.52198  | 0.28089  | -2.17298 |
| C | 6.65110  | 1.35246  | -1.55768 |
| H | 2.10038  | -0.50980 | -1.61427 |
| H | 4.03488  | -0.42058 | -2.85621 |
| H | 4.11013  | 1.54462  | -0.45116 |
| C | 7.95189  | 1.92260  | -2.04198 |
| H | 6.12141  | 1.99196  | -0.84930 |
| H | 6.34186  | 0.12438  | -3.29130 |
| H | 7.74503  | 2.82309  | -2.63716 |
| H | 8.61643  | 2.22359  | -1.22435 |
| H | 8.49330  | 1.22511  | -2.69307 |
| C | 7.29716  | 0.03541  | -0.07099 |
| C | 6.14276  | -0.41329 | 0.57144  |
| C | 5.67407  | -1.59521 | -0.06133 |
| C | 6.56600  | -1.96246 | -1.02753 |
| C | 7.77754  | -1.10526 | -0.93468 |
| H | 7.98753  | 0.73352  | 0.40025  |
| H | 5.64673  | 0.09037  | 1.39874  |
| H | 4.73057  | -2.09091 | 0.15622  |
| H | 6.47205  | -2.81334 | -1.69609 |

---

|   |          |          |          |
|---|----------|----------|----------|
| H | 8.55101  | -1.65527 | -0.36889 |
| H | 8.23601  | -0.83728 | -1.89233 |
| O | -0.86976 | 5.15282  | -0.78899 |
| C | -1.92699 | 4.54882  | -1.48263 |
| H | -1.84151 | 4.84542  | -2.53375 |
| H | -2.90853 | 4.90545  | -1.12430 |

M06/lanl2dz-6-31G(d) Energy = -2646.117014

M06/lanl2dz-6-31G(d) Free Energy = -2645.480715

M06/def2-TZVP Derived free energy = -2646.593025

M06/def2-TZVP Derived free energy in solution (toluene) = -2646.623504

M06/def2-TZVP Derived free energy in solution (nitromethane) = -2646.648284

Number of Imaginary Frequencies = 1 (-393.76)

M06/lanl2dz-6-31G(d) Geometry

|   |          |          |          |
|---|----------|----------|----------|
| C | -0.05937 | 3.03952  | 0.23877  |
| C | 0.25686  | 4.43773  | -0.33501 |
| C | -1.34766 | 2.78992  | -1.89525 |
| N | -0.81120 | 2.25677  | -0.74813 |
| C | -1.09170 | 0.93344  | -0.71373 |
| N | -1.78848 | 0.74050  | -1.84595 |
| N | -1.95717 | 1.88191  | -2.59613 |
| C | 0.43637  | 5.30715  | 0.90488  |
| C | -0.47301 | 4.65738  | 1.91202  |
| C | -0.79097 | 3.35608  | 1.51931  |
| C | -1.61768 | 2.55510  | 2.29468  |
| C | -2.12832 | 3.07727  | 3.48194  |
| C | -1.80851 | 4.37367  | 3.87944  |
| C | -0.97844 | 5.17348  | 3.09660  |
| C | -2.33899 | -0.49067 | -2.30752 |
| C | -3.75286 | -0.64770 | -2.33190 |
| C | -4.28008 | -1.91481 | -2.71713 |
| C | -3.39354 | -2.95615 | -3.07946 |
| C | -2.03691 | -2.77060 | -3.07866 |
| C | -1.51182 | -1.52188 | -2.69368 |
| C | -4.65083 | 0.38488  | -1.96713 |

---

|    |          |          |          |
|----|----------|----------|----------|
| C  | -6.00584 | 0.16326  | -1.97981 |
| C  | -6.52988 | -1.09222 | -2.35608 |
| C  | -5.68215 | -2.10690 | -2.71866 |
| H  | 0.87103  | 2.48331  | 0.42961  |
| H  | 1.13372  | 4.42222  | -1.00619 |
| H  | 0.18339  | 6.35017  | 0.67819  |
| H  | 1.48565  | 5.28620  | 1.23602  |
| H  | -1.87812 | 1.54021  | 1.99121  |
| H  | -2.78177 | 2.46587  | 4.10107  |
| H  | -2.21643 | 4.76805  | 4.80827  |
| H  | -0.74015 | 6.19087  | 3.40441  |
| H  | -3.80957 | -3.91967 | -3.37129 |
| H  | -1.35408 | -3.56368 | -3.37184 |
| Cl | 0.21861  | -1.31569 | -2.74185 |
| H  | -4.26277 | 1.36348  | -1.69215 |
| H  | -6.68415 | 0.96787  | -1.70278 |
| H  | -7.60645 | -1.24813 | -2.36275 |
| H  | -6.07282 | -3.07922 | -3.01693 |
| Au | -0.31844 | -0.49977 | 0.73190  |
| C  | 0.42696  | -1.88326 | 2.05331  |
| C  | -0.52282 | -2.77152 | 2.58558  |
| C  | 1.76083  | -1.97396 | 2.41610  |
| C  | -0.10308 | -3.77827 | 3.45201  |
| C  | 2.16992  | -2.98321 | 3.29232  |
| H  | 2.48777  | -1.25527 | 2.03856  |
| C  | 1.24142  | -3.88548 | 3.79762  |
| H  | -0.82425 | -4.47945 | 3.87150  |
| H  | 3.21651  | -3.05672 | 3.58495  |
| H  | 1.56207  | -4.67242 | 4.47762  |
| C  | -2.06339 | -1.36468 | 1.35773  |
| C  | -3.31538 | -0.91989 | 0.97653  |
| C  | -1.89926 | -2.48493 | 2.19188  |
| C  | -4.44591 | -1.62819 | 1.39370  |
| H  | -3.43983 | -0.03378 | 0.35799  |
| C  | -3.03954 | -3.17674 | 2.59726  |
| C  | -4.30322 | -2.75538 | 2.19278  |

---

|   |          |          |          |
|---|----------|----------|----------|
| H | -5.43373 | -1.28744 | 1.08742  |
| H | -2.94327 | -4.04925 | 3.24281  |
| H | -5.18329 | -3.30893 | 2.51444  |
| O | 1.70292  | 0.29126  | 0.13683  |
| C | 3.72209  | -0.09946 | -1.02479 |
| C | 2.49283  | -0.48276 | -0.46580 |
| C | 5.76121  | -0.85589 | -2.24293 |
| C | 4.49717  | -1.04818 | -1.67459 |
| C | 6.45241  | 0.36014  | -2.19602 |
| H | 2.22154  | -1.55229 | -0.56315 |
| H | 4.07647  | -2.05607 | -1.74048 |
| H | 4.01215  | 0.94862  | -0.95693 |
| C | 7.58170  | 0.61322  | -3.15192 |
| H | 5.86947  | 1.24805  | -1.94493 |
| H | 6.23904  | -1.70548 | -2.73227 |
| H | 8.21838  | 1.45170  | -2.84873 |
| H | 8.21386  | -0.27307 | -3.28812 |
| H | 7.16417  | 0.86398  | -4.13713 |
| C | 7.46838  | 0.35126  | -0.36832 |
| C | 6.46996  | 0.35234  | 0.60384  |
| C | 6.14826  | -0.98430 | 0.95865  |
| C | 6.98984  | -1.83279 | 0.29868  |
| C | 8.04289  | -1.04287 | -0.39381 |
| H | 8.07419  | 1.23097  | -0.57969 |
| H | 5.97725  | 1.23788  | 0.99830  |
| H | 5.33289  | -1.27700 | 1.61429  |
| H | 6.97773  | -2.91754 | 0.35052  |
| H | 8.95066  | -1.04565 | 0.23628  |
| H | 8.34995  | -1.42979 | -1.37120 |
| O | -0.86701 | 4.94087  | -1.03391 |
| C | -1.14303 | 4.23248  | -2.20959 |
| H | -0.32001 | 4.33519  | -2.94134 |
| H | -2.04549 | 4.65955  | -2.65899 |

M06/lanl2dz-6-31G(d) Energy = -2646.116287

M06/lanl2dz-6-31G(d) Free Energy = -2645.476828

---

M06/def2-TZVP Derived free energy = -2646.586463

M06/def2-TZVP Derived free energy in solution (toluene) = -2646.616396

M06/def2-TZVP Derived free energy in solution (nitromethane) = -2646.639947

Number of Imaginary Frequencies = 1 (-389.33)

M06/lanl2dz-6-31G(d) Geometry

|   |          |          |          |
|---|----------|----------|----------|
| C | -0.21841 | 3.17138  | 0.53471  |
| C | -0.64958 | 4.64998  | 0.50650  |
| C | -1.86829 | 3.06411  | -1.36719 |
| N | -1.10796 | 2.43608  | -0.40736 |
| C | -1.29124 | 1.09724  | -0.52628 |
| N | -2.16004 | 0.99664  | -1.54652 |
| N | -2.52866 | 2.20588  | -2.08465 |
| C | -1.81000 | 4.73453  | 1.51670  |
| C | -1.40576 | 3.69204  | 2.52120  |
| C | -0.46815 | 2.81210  | 1.97004  |
| C | 0.13457  | 1.82610  | 2.74309  |
| C | -0.26580 | 1.68257  | 4.06972  |
| C | -1.22775 | 2.53410  | 4.61153  |
| C | -1.79147 | 3.55500  | 3.84824  |
| C | -2.72376 | -0.19922 | -2.08196 |
| C | -4.11619 | -0.43684 | -1.90803 |
| C | -4.65287 | -1.66915 | -2.38159 |
| C | -3.79627 | -2.60324 | -3.01028 |
| C | -2.46484 | -2.34018 | -3.19129 |
| C | -1.93243 | -1.12048 | -2.73022 |
| C | -4.97886 | 0.47496  | -1.25241 |
| C | -6.30764 | 0.17539  | -1.08052 |
| C | -6.84234 | -1.04108 | -1.55600 |
| C | -6.02852 | -1.94219 | -2.19310 |
| H | 0.80968  | 3.00702  | 0.19426  |
| H | 0.19374  | 5.23192  | 0.89912  |
| H | -2.77571 | 4.48574  | 1.04821  |
| H | -1.91586 | 5.74007  | 1.94105  |
| H | 0.93004  | 1.20282  | 2.33394  |
| H | 0.18952  | 0.91382  | 4.69078  |

---

|    |          |          |          |
|----|----------|----------|----------|
| H  | -1.52409 | 2.41580  | 5.65210  |
| H  | -2.51195 | 4.24175  | 4.29078  |
| H  | -4.21556 | -3.54523 | -3.36169 |
| H  | -1.80760 | -3.04823 | -3.68913 |
| Cl | -0.24590 | -0.80437 | -3.03447 |
| H  | -4.58619 | 1.42443  | -0.89491 |
| H  | -6.95855 | 0.88780  | -0.57762 |
| H  | -7.89898 | -1.25856 | -1.41592 |
| H  | -6.42566 | -2.88636 | -2.56457 |
| Au | -0.17922 | -0.46402 | 0.50644  |
| C  | 0.92853  | -1.92629 | 1.43176  |
| C  | 0.20351  | -3.05542 | 1.84800  |
| C  | 2.29316  | -1.83876 | 1.66071  |
| C  | 0.87917  | -4.11659 | 2.44755  |
| C  | 2.95848  | -2.90347 | 2.27691  |
| H  | 2.84749  | -0.94102 | 1.38271  |
| C  | 2.25398  | -4.04145 | 2.65371  |
| H  | 0.33359  | -5.00198 | 2.77328  |
| H  | 4.02918  | -2.83467 | 2.47067  |
| H  | 2.77371  | -4.87055 | 3.13021  |
| C  | -1.67496 | -1.71765 | 1.11607  |
| C  | -3.01630 | -1.41159 | 0.99849  |
| C  | -1.24019 | -2.93891 | 1.66099  |
| C  | -3.96766 | -2.36395 | 1.37559  |
| H  | -3.34538 | -0.44641 | 0.62207  |
| C  | -2.20412 | -3.87611 | 2.02899  |
| C  | -3.55891 | -3.59414 | 1.87489  |
| H  | -5.02640 | -2.13053 | 1.26996  |
| H  | -1.89647 | -4.83283 | 2.45045  |
| H  | -4.29936 | -4.33738 | 2.16421  |
| O  | 1.66225  | 0.71607  | -0.04336 |
| C  | 3.74932  | 0.77444  | -1.13121 |
| C  | 2.44363  | 0.29945  | -0.93959 |
| C  | 5.86825  | 0.57224  | -2.41572 |
| C  | 4.52230  | 0.28202  | -2.17262 |
| C  | 6.65124  | 1.35349  | -1.55654 |



---

|   |          |          |          |
|---|----------|----------|----------|
| H | 2.10063  | -0.50902 | -1.61457 |
| H | 4.03533  | -0.41913 | -2.85625 |
| H | 4.11023  | 1.54483  | -0.45018 |
| C | 7.95205  | 1.92396  | -2.04038 |
| H | 6.12139  | 1.99261  | -0.84793 |
| H | 6.34232  | 0.12626  | -3.29082 |
| H | 7.74520  | 2.82464  | -2.63529 |
| H | 8.61638  | 2.22474  | -1.22250 |
| H | 8.49369  | 1.22677  | -2.69160 |
| C | 7.29717  | 0.03585  | -0.07033 |
| C | 6.14272  | -0.41333 | 0.57168  |
| C | 5.67438  | -1.59509 | -0.06166 |
| C | 6.56658  | -1.96179 | -1.02781 |
| C | 7.77792  | -1.10436 | -0.93443 |
| H | 7.98733  | 0.73385  | 0.40139  |
| H | 5.64646  | 0.08986  | 1.39912  |
| H | 4.73092  | -2.09104 | 0.15549  |
| H | 6.47292  | -2.81241 | -1.69675 |
| H | 8.55148  | -1.65442 | -0.36882 |
| H | 8.23639  | -0.83587 | -1.89194 |
| O | -0.86943 | 5.15324  | -0.78640 |
| C | -1.92617 | 4.54953  | -1.48107 |
| H | -1.83995 | 4.84666  | -2.53198 |
| H | -2.90797 | 4.90595  | -1.12325 |

M06/lanl2dz-6-31G(d) Energy = -2646.114488

M06/lanl2dz-6-31G(d) Free Energy = -2645.478540

M06/def2-TZVP Derived free energy = -2646.587736

M06/def2-TZVP Derived free energy in solution (toluene) = -2646.617764

M06/def2-TZVP Derived free energy in solution (nitromethane) = -2646.641506

Number of Imaginary Frequencies = 1 (-360.03)

M06/lanl2dz-6-31G(d) Geometry

|   |          |         |          |
|---|----------|---------|----------|
| C | -0.52513 | 3.20651 | 0.72144  |
| C | -0.98267 | 4.66301 | 0.51970  |
| C | -1.46164 | 3.00192 | -1.60770 |

---

|    |          |          |          |
|----|----------|----------|----------|
| N  | -1.04790 | 2.42106  | -0.43126 |
| C  | -1.14248 | 1.07475  | -0.56254 |
| N  | -1.61331 | 0.92206  | -1.81172 |
| N  | -1.81617 | 2.10648  | -2.47946 |
| C  | -2.40985 | 4.70079  | 1.09960  |
| C  | -2.30199 | 3.69714  | 2.21312  |
| C  | -1.19988 | 2.85847  | 2.01504  |
| C  | -0.82862 | 1.92080  | 2.97156  |
| C  | -1.62139 | 1.77918  | 4.10839  |
| C  | -2.74316 | 2.58684  | 4.29036  |
| C  | -3.08168 | 3.56285  | 3.35418  |
| C  | -1.88614 | -0.30631 | -2.48181 |
| C  | -3.23423 | -0.63518 | -2.79525 |
| C  | -3.49516 | -1.90078 | -3.39538 |
| C  | -2.41627 | -2.77115 | -3.67871 |
| C  | -1.12290 | -2.41677 | -3.40170 |
| C  | -0.86135 | -1.16783 | -2.80532 |
| C  | -4.32367 | 0.22286  | -2.50871 |
| C  | -5.60785 | -0.16154 | -2.80594 |
| C  | -5.86822 | -1.41385 | -3.40294 |
| C  | -4.83081 | -2.26293 | -3.69084 |
| H  | 0.56283  | 3.07761  | 0.72291  |
| H  | -0.33700 | 5.28779  | 1.14990  |
| H  | -3.15874 | 4.39028  | 0.35343  |
| H  | -2.69427 | 5.70551  | 1.43408  |
| H  | 0.08185  | 1.33302  | 2.85377  |
| H  | -1.35140 | 1.04637  | 4.86614  |
| H  | -3.34755 | 2.47171  | 5.18809  |
| H  | -3.93470 | 4.21826  | 3.52515  |
| H  | -2.62843 | -3.73705 | -4.13559 |
| H  | -0.29013 | -3.07449 | -3.63631 |
| Cl | 0.80323  | -0.73846 | -2.51469 |
| H  | -4.13638 | 1.19799  | -2.06366 |
| H  | -6.43499 | 0.51008  | -2.58448 |
| H  | -6.89192 | -1.69868 | -3.63608 |
| H  | -5.01544 | -3.23225 | -4.15289 |

---

|    |          |          |          |
|----|----------|----------|----------|
| Au | -0.42545 | -0.43125 | 0.84186  |
| C  | 0.31892  | -1.85114 | 2.12286  |
| C  | -0.50737 | -2.96865 | 2.32903  |
| C  | 1.54718  | -1.74844 | 2.75590  |
| C  | -0.06127 | -4.00117 | 3.15077  |
| C  | 1.98133  | -2.78791 | 3.58443  |
| H  | 2.16839  | -0.86218 | 2.62319  |
| C  | 1.18287  | -3.91034 | 3.77009  |
| H  | -0.68629 | -4.87682 | 3.32459  |
| H  | 2.94342  | -2.71304 | 4.08923  |
| H  | 1.52328  | -4.71897 | 4.41430  |
| C  | -2.03847 | -1.68038 | 0.96986  |
| C  | -3.26173 | -1.40191 | 0.39226  |
| C  | -1.81008 | -2.87546 | 1.67574  |
| C  | -4.27941 | -2.35751 | 0.45815  |
| H  | -3.44647 | -0.45469 | -0.10787 |
| C  | -2.83776 | -3.81509 | 1.73165  |
| C  | -4.06026 | -3.56214 | 1.11487  |
| H  | -5.24019 | -2.14924 | -0.01095 |
| H  | -2.68626 | -4.75190 | 2.26755  |
| H  | -4.85170 | -4.30758 | 1.16351  |
| O  | 1.47606  | 0.77934  | 0.77734  |
| C  | 3.60311  | 0.99863  | -0.22503 |
| C  | 2.47499  | 0.28097  | 0.19023  |
| C  | 5.76906  | 0.93125  | -1.44479 |
| C  | 4.61233  | 0.34941  | -0.91496 |
| C  | 6.64533  | 0.25753  | -2.31570 |
| H  | 2.47987  | -0.80766 | -0.01684 |
| H  | 4.47299  | -0.72257 | -1.10523 |
| H  | 3.65071  | 2.07098  | -0.03240 |
| C  | 7.47167  | 1.06806  | -3.27912 |
| H  | 6.26845  | -0.68237 | -2.72634 |
| H  | 5.95265  | 1.98873  | -1.23598 |
| H  | 8.22536  | 0.46544  | -3.79725 |
| H  | 6.81668  | 1.50402  | -4.04546 |
| H  | 7.98104  | 1.89959  | -2.77406 |

---

|   |          |          |          |
|---|----------|----------|----------|
| C | 8.13242  | -0.54303 | -1.17659 |
| C | 7.51720  | -1.66535 | -0.61516 |
| C | 6.86222  | -1.29674 | 0.58100  |
| C | 7.15371  | 0.01615  | 0.85478  |
| C | 8.21045  | 0.48661  | -0.07811 |
| H | 8.90867  | -0.63165 | -1.93514 |
| H | 7.46228  | -2.64588 | -1.08203 |
| H | 6.20345  | -1.93574 | 1.16214  |
| H | 6.77485  | 0.59348  | 1.69354  |
| H | 8.14759  | 1.53688  | -0.37988 |
| H | 9.18818  | 0.36041  | 0.42196  |
| C | -1.53587 | 4.48193  | -1.77355 |
| H | -1.12084 | 4.77135  | -2.74523 |
| H | -2.59487 | 4.79450  | -1.76750 |
| O | -0.79364 | 5.14436  | -0.78656 |

M06/lanl2dz-6-31G(d) Energy = -2646.116288

M06/lanl2dz-6-31G(d) Free Energy = -2645.476826

M06/def2-TZVP Derived free energy = -2646.586460

M06/def2-TZVP Derived free energy in solution (toluene) = -2646.616393

M06/def2-TZVP Derived free energy in solution (nitromethane) = -2646.639944

Number of Imaginary Frequencies = 1 (-389.34)

M06/lanl2dz-6-31G(d) Geometry

|   |          |         |          |
|---|----------|---------|----------|
| C | -0.21861 | 3.17157 | 0.53391  |
| C | -0.64973 | 4.65019 | 0.50532  |
| C | -1.86889 | 3.06375 | -1.36761 |
| N | -1.10834 | 2.43599 | -0.40778 |
| C | -1.29150 | 1.09710 | -0.52640 |
| N | -2.16048 | 0.99622 | -1.54646 |
| N | -2.52929 | 2.20531 | -2.08479 |
| C | -1.80987 | 4.73514 | 1.51581  |
| C | -1.40545 | 3.69294 | 2.52052  |
| C | -0.46805 | 2.81276 | 1.96940  |
| C | 0.13479  | 1.82696 | 2.74264  |
| C | -0.26524 | 1.68390 | 4.06942  |

---

|    |          |          |          |
|----|----------|----------|----------|
| C  | -1.22699 | 2.53568  | 4.61120  |
| C  | -1.79084 | 3.55636  | 3.84771  |
| C  | -2.72411 | -0.19980 | -2.08165 |
| C  | -4.11652 | -0.43751 | -1.90760 |
| C  | -4.65311 | -1.66994 | -2.38095 |
| C  | -3.79648 | -2.60404 | -3.00956 |
| C  | -2.46508 | -2.34090 | -3.19068 |
| C  | -1.93275 | -1.12109 | -2.72983 |
| C  | -4.97922 | 0.47429  | -1.25205 |
| C  | -6.30796 | 0.17463  | -1.08003 |
| C  | -6.84259 | -1.04194 | -1.55531 |
| C  | -6.02873 | -1.94307 | -2.19234 |
| H  | 0.80942  | 3.00708  | 0.19332  |
| H  | 0.19373  | 5.23222  | 0.89750  |
| H  | -2.77573 | 4.48628  | 1.04765  |
| H  | -1.91554 | 5.74082  | 1.93987  |
| H  | 0.93012  | 1.20349  | 2.33350  |
| H  | 0.19019  | 0.91533  | 4.69061  |
| H  | -1.52306 | 2.41775  | 5.65188  |
| H  | -2.51116 | 4.24329  | 4.29021  |
| H  | -4.21571 | -3.54612 | -3.36081 |
| H  | -1.80781 | -3.04897 | -3.68845 |
| Cl | -0.24627 | -0.80488 | -3.03425 |
| H  | -4.58661 | 1.42384  | -0.89470 |
| H  | -6.95891 | 0.88706  | -0.57719 |
| H  | -7.89920 | -1.25950 | -1.41513 |
| H  | -6.42582 | -2.88732 | -2.56365 |
| Au | -0.17920 | -0.46384 | 0.50651  |
| C  | 0.92882  | -1.92574 | 1.43208  |
| C  | 0.20402  | -3.05495 | 1.84849  |
| C  | 2.29343  | -1.83788 | 1.66107  |
| C  | 0.87988  | -4.11588 | 2.44823  |
| C  | 2.95894  | -2.90233 | 2.27749  |
| H  | 2.84757  | -0.94006 | 1.38292  |
| C  | 2.25467  | -4.04041 | 2.65445  |
| H  | 0.33448  | -5.00133 | 2.77410  |

---

|   |          |          |          |
|---|----------|----------|----------|
| H | 4.02961  | -2.83327 | 2.47130  |
| H | 2.77455  | -4.86932 | 3.13110  |
| C | -1.67471 | -1.71763 | 1.11639  |
| C | -3.01610 | -1.41183 | 0.99882  |
| C | -1.23970 | -2.93874 | 1.66146  |
| C | -3.96728 | -2.36432 | 1.37605  |
| H | -3.34538 | -0.44676 | 0.62230  |
| C | -2.20345 | -3.87608 | 2.02957  |
| C | -3.55830 | -3.59438 | 1.87547  |
| H | -5.02606 | -2.13109 | 1.27042  |
| H | -1.89561 | -4.83270 | 2.45113  |
| H | -4.29860 | -4.33773 | 2.16489  |
| O | 1.66216  | 0.71626  | -0.04368 |
| C | 3.74926  | 0.77427  | -1.13147 |
| C | 2.44352  | 0.29942  | -0.93982 |
| C | 5.86819  | 0.57183  | -2.41596 |
| C | 4.52222  | 0.28169  | -2.17281 |
| C | 6.65121  | 1.35312  | -1.55686 |
| H | 2.10048  | -0.50913 | -1.61467 |
| H | 4.03521  | -0.41949 | -2.85638 |
| H | 4.11023  | 1.54468  | -0.45049 |
| C | 7.95203  | 1.92353  | -2.04078 |
| H | 6.12140  | 1.99229  | -0.84828 |
| H | 6.34222  | 0.12576  | -3.29103 |
| H | 7.74519  | 2.82425  | -2.63562 |
| H | 8.61646  | 2.22422  | -1.22295 |
| H | 8.49355  | 1.22632  | -2.69209 |
| C | 7.29720  | 0.03551  | -0.07060 |
| C | 6.14276  | -0.41357 | 0.57150  |
| C | 5.67429  | -1.59529 | -0.06178 |
| C | 6.56639  | -1.96209 | -1.02800 |
| C | 7.77781  | -1.10476 | -0.93469 |
| H | 7.98744  | 0.73349  | 0.40103  |
| H | 5.64659  | 0.08969  | 1.39895  |
| H | 4.73081  | -2.09117 | 0.15546  |
| H | 6.47261  | -2.81270 | -1.69691 |

---

|   |          |          |          |
|---|----------|----------|----------|
| H | 8.55133  | -1.65488 | -0.36908 |
| H | 8.23629  | -0.83634 | -1.89222 |
| C | -1.92689 | 4.54913  | -1.48183 |
| H | -1.84108 | 4.84601  | -2.53284 |
| H | -2.90859 | 4.90559  | -1.12374 |
| O | -0.86994 | 5.15305  | -0.78768 |

M06/lanl2dz-6-31G(d) Energy = -2646.114237

M06/lanl2dz-6-31G(d) Free Energy = -2645.473742

M06/def2-TZVP Derived free energy = -2646.582003

M06/def2-TZVP Derived free energy in solution (toluene) = -2646.612629

M06/def2-TZVP Derived free energy in solution (nitromethane) = -2646.636959

Number of Imaginary Frequencies = 1 (-365.19)

M06/lanl2dz-6-31G(d) Geometry

|   |          |          |          |
|---|----------|----------|----------|
| C | 0.76557  | 2.77095  | 0.23695  |
| C | 0.78468  | 4.27419  | 0.57504  |
| C | -1.48016 | 3.40651  | -0.70246 |
| N | -0.60923 | 2.44757  | -0.23447 |
| C | -1.18697 | 1.23125  | -0.40305 |
| N | -2.37199 | 1.52788  | -0.96093 |
| N | -2.57315 | 2.87341  | -1.15690 |
| C | 0.23304  | 4.34678  | 2.01185  |
| C | 0.76271  | 3.06470  | 2.59076  |
| C | 1.09838  | 2.16697  | 1.57023  |
| C | 1.72285  | 0.95801  | 1.85574  |
| C | 1.94821  | 0.62060  | 3.18869  |
| C | 1.57590  | 1.49429  | 4.20975  |
| C | 0.99762  | 2.72883  | 3.91773  |
| C | -3.37570 | 0.60748  | -1.38559 |
| C | -4.63334 | 0.60069  | -0.71906 |
| C | -5.59405 | -0.37623 | -1.11057 |
| C | -5.28243 | -1.28137 | -2.15228 |
| C | -4.07823 | -1.23270 | -2.80178 |
| C | -3.12255 | -0.27263 | -2.41528 |
| C | -4.95792 | 1.49396  | 0.33075  |

---

|    |          |          |          |
|----|----------|----------|----------|
| C  | -6.17546 | 1.41448  | 0.96095  |
| C  | -7.12737 | 0.44640  | 0.57550  |
| C  | -6.83974 | -0.42741 | -0.44102 |
| H  | 1.44919  | 2.49348  | -0.57303 |
| H  | 1.83889  | 4.57923  | 0.59584  |
| H  | -0.86848 | 4.36317  | 2.02313  |
| H  | 0.56956  | 5.24567  | 2.54184  |
| H  | 2.04812  | 0.30038  | 1.04941  |
| H  | 2.42396  | -0.32850 | 3.43280  |
| H  | 1.76059  | 1.21995  | 5.24673  |
| H  | 0.74810  | 3.42322  | 4.71894  |
| H  | -6.02615 | -2.02298 | -2.44102 |
| H  | -3.84183 | -1.91392 | -3.61489 |
| Cl | -1.62575 | -0.22247 | -3.30476 |
| H  | -4.24237 | 2.25788  | 0.62665  |
| H  | -6.41189 | 2.11115  | 1.76287  |
| H  | -8.08825 | 0.40023  | 1.08344  |
| H  | -7.56548 | -1.17778 | -0.75279 |
| Au | -0.28044 | -0.71677 | -0.07143 |
| C  | 0.60544  | -2.55289 | 0.21506  |
| C  | -0.18042 | -3.49246 | 0.90607  |
| C  | 1.88349  | -2.88589 | -0.20805 |
| C  | 0.32437  | -4.77042 | 1.13676  |
| C  | 2.38275  | -4.16930 | 0.03600  |
| H  | 2.51127  | -2.16410 | -0.73342 |
| C  | 1.60204  | -5.10785 | 0.69921  |
| H  | -0.27367 | -5.50888 | 1.67033  |
| H  | 3.38541  | -4.43455 | -0.29926 |
| H  | 1.99027  | -6.10772 | 0.88362  |
| C  | -1.70337 | -1.62110 | 1.08241  |
| C  | -2.83004 | -0.97069 | 1.54703  |
| C  | -1.46622 | -2.97694 | 1.36774  |
| C  | -3.79067 | -1.69239 | 2.26038  |
| H  | -2.98514 | 0.08956  | 1.36713  |
| C  | -2.43276 | -3.67892 | 2.08621  |
| C  | -3.59371 | -3.04331 | 2.51762  |



---

|   |          |          |          |
|---|----------|----------|----------|
| H | -4.69048 | -1.18557 | 2.60695  |
| H | -2.27870 | -4.73297 | 2.31609  |
| H | -4.34319 | -3.60725 | 3.06948  |
| O | 1.42800  | 0.13435  | -1.23888 |
| C | 3.25894  | -0.23748 | -2.66608 |
| C | 1.90885  | -0.34916 | -2.30557 |
| C | 5.54676  | 0.45861  | -1.95410 |
| C | 4.16395  | 0.36077  | -1.79993 |
| C | 6.36442  | 1.19915  | -1.07709 |
| H | 1.23848  | -0.91264 | -2.97838 |
| H | 3.73753  | 0.81196  | -0.89627 |
| H | 3.58829  | -0.67292 | -3.60822 |
| C | 7.70642  | 1.67176  | -1.56844 |
| H | 5.84055  | 1.91496  | -0.43947 |
| H | 6.01263  | -0.03349 | -2.81258 |
| H | 8.27077  | 0.86014  | -2.04645 |
| H | 7.56364  | 2.45601  | -2.32413 |
| H | 8.32237  | 2.09691  | -0.76870 |
| C | 6.93705  | -0.05714 | 0.40898  |
| C | 5.79970  | -0.14543 | 1.22033  |
| C | 4.96849  | -1.19104 | 0.76140  |
| C | 5.61359  | -1.84647 | -0.25818 |
| C | 7.01508  | -1.36123 | -0.34523 |
| H | 7.83348  | 0.46858  | 0.73493  |
| H | 5.54485  | 0.55001  | 2.01703  |
| H | 3.96600  | -1.41631 | 1.12056  |
| H | 5.21170  | -2.67000 | -0.84384 |
| H | 7.65126  | -2.04655 | 0.24421  |
| H | 7.44419  | -1.32433 | -1.35163 |
| O | 0.18993  | 5.08770  | -0.40064 |
| C | -1.17878 | 4.86281  | -0.60385 |
| H | -1.78849 | 5.30594  | 0.20317  |
| H | -1.45986 | 5.36770  | -1.53430 |

Top, towards, 2, exo, towards

---

M06/lanl2dz-6-31G(d) Energy = -2646.109704  
M06/lanl2dz-6-31G(d) Free Energy = -2645.473166  
M06/def2-TZVP Derived free energy = -2646.583008  
M06/def2-TZVP Derived free energy in solution (toluene) = -2646.613677  
M06/def2-TZVP Derived free energy in solution (nitromethane) = -2646.638488  
Number of Imaginary Frequencies = 1 (-375.92)

M06/lanl2dz-6-31G(d) Geometry

|   |          |          |          |
|---|----------|----------|----------|
| C | -1.18182 | 1.93108  | -1.29741 |
| C | -2.59453 | 2.56678  | -1.07482 |
| C | -0.61203 | 2.71023  | 0.97360  |
| N | -0.48786 | 1.77592  | -0.02352 |
| C | 0.42619  | 0.85576  | 0.34959  |
| N | 0.81235  | 1.29265  | 1.56063  |
| N | 0.16799  | 2.43846  | 1.97493  |
| C | -2.73402 | 3.64877  | -2.16336 |
| C | -1.34463 | 3.86249  | -2.69135 |
| C | -0.47013 | 2.89150  | -2.21086 |
| C | 0.87111  | 2.87432  | -2.57671 |
| C | 1.33345  | 3.86150  | -3.44076 |
| C | 0.46265  | 4.83955  | -3.92524 |
| C | -0.87962 | 4.84650  | -3.55778 |
| C | 1.77596  | 0.67030  | 2.40726  |
| C | 3.03692  | 1.30079  | 2.59042  |
| C | 4.02208  | 0.61800  | 3.36032  |
| C | 3.70780  | -0.63708 | 3.93399  |
| C | 2.47646  | -1.21175 | 3.76399  |
| C | 1.50318  | -0.54766 | 2.99136  |
| C | 3.36439  | 2.55093  | 2.01164  |
| C | 4.61675  | 3.08811  | 2.18239  |
| C | 5.59563  | 2.41153  | 2.94139  |
| C | 5.29980  | 1.20401  | 3.52030  |
| H | -1.26941 | 0.92703  | -1.73189 |
| H | -3.36626 | 1.79114  | -1.16307 |
| H | -3.18998 | 4.55289  | -1.73618 |
| H | -3.41269 | 3.30756  | -2.95845 |

---

|    |          |          |          |
|----|----------|----------|----------|
| H  | 1.54719  | 2.10416  | -2.20031 |
| H  | 2.37845  | 3.87059  | -3.74343 |
| H  | 0.83921  | 5.60577  | -4.60023 |
| H  | -1.55296 | 5.61256  | -3.94038 |
| H  | 4.46983  | -1.14924 | 4.52021  |
| H  | 2.23168  | -2.17327 | 4.20765  |
| Cl | -0.04311 | -1.31684 | 2.78292  |
| H  | 2.61248  | 3.08951  | 1.43741  |
| H  | 4.85459  | 4.05093  | 1.73418  |
| H  | 6.58125  | 2.85405  | 3.06902  |
| H  | 6.04537  | 0.67244  | 4.11063  |
| Au | 0.81861  | -1.04674 | -0.62504 |
| C  | 1.18770  | -2.89631 | -1.44056 |
| C  | 2.53283  | -3.14193 | -1.76882 |
| C  | 0.22693  | -3.87811 | -1.62091 |
| C  | 2.89051  | -4.37729 | -2.30264 |
| C  | 0.59791  | -5.11448 | -2.15829 |
| H  | -0.81160 | -3.71169 | -1.33629 |
| C  | 1.92238  | -5.35802 | -2.50022 |
| H  | 3.92816  | -4.58509 | -2.56321 |
| H  | -0.15475 | -5.88793 | -2.30209 |
| H  | 2.20835  | -6.32156 | -2.91767 |
| C  | 2.83218  | -0.89545 | -0.92102 |
| C  | 3.56168  | 0.23803  | -0.61072 |
| C  | 3.43738  | -2.03209 | -1.48380 |
| C  | 4.94054  | 0.24554  | -0.83688 |
| H  | 3.08835  | 1.12023  | -0.18464 |
| C  | 4.81287  | -2.00171 | -1.70790 |
| C  | 5.55917  | -0.87229 | -1.38216 |
| H  | 5.51889  | 1.13248  | -0.58293 |
| H  | 5.31018  | -2.86873 | -2.14182 |
| H  | 6.63274  | -0.86770 | -1.56046 |
| O  | -1.40414 | -1.26691 | -0.41664 |
| C  | -3.55235 | -1.72223 | -1.28748 |
| C  | -2.16456 | -1.53761 | -1.38968 |
| C  | -5.54399 | -1.98849 | 0.16974  |

---

|   |          |          |          |
|---|----------|----------|----------|
| C | -4.19790 | -1.69819 | -0.05918 |
| C | -6.07926 | -2.17016 | 1.45850  |
| H | -1.71681 | -1.64655 | -2.39613 |
| H | -3.57266 | -1.48671 | 0.81503  |
| H | -4.10414 | -1.95919 | -2.19679 |
| C | -7.28693 | -3.05316 | 1.62386  |
| H | -5.34486 | -2.25219 | 2.26311  |
| H | -6.18683 | -2.17889 | -0.69447 |
| H | -7.70806 | -3.00696 | 2.63391  |
| H | -8.07744 | -2.79587 | 0.90651  |
| H | -7.00326 | -4.09730 | 1.43445  |
| C | -6.88606 | -0.38185 | 2.03876  |
| C | -5.76164 | 0.37058  | 2.38315  |
| C | -5.26401 | 1.03908  | 1.24007  |
| C | -6.12724 | 0.81581  | 0.19801  |
| C | -7.35114 | 0.14027  | 0.70360  |
| H | -7.58652 | -0.74979 | 2.78671  |
| H | -5.28425 | 0.36510  | 3.36019  |
| H | -4.33921 | 1.61069  | 1.19143  |
| H | -6.00967 | 1.17805  | -0.82027 |
| H | -8.11446 | 0.91580  | 0.89741  |
| H | -7.81012 | -0.58478 | 0.02354  |
| O | -2.78286 | 3.08196  | 0.23443  |
| C | -1.66681 | 3.74200  | 0.79901  |
| H | -1.31932 | 4.57353  | 0.16273  |
| H | -1.97479 | 4.15233  | 1.76480  |

M06/lanl2dz-6-31G(d) Energy = -2646.115040

M06/lanl2dz-6-31G(d) Free Energy = -2645.475921

M06/def2-TZVP Derived free energy = -2646.587187

M06/def2-TZVP Derived free energy in solution (toluene) = -2646.618038

M06/def2-TZVP Derived free energy in solution (nitromethane) = -2646.642416

Number of Imaginary Frequencies = 1 (-389.19)

M06/lanl2dz-6-31G(d) Geometry

|   |          |          |         |
|---|----------|----------|---------|
| C | -1.69721 | -1.81300 | 0.38918 |
|---|----------|----------|---------|

---

|    |          |          |          |
|----|----------|----------|----------|
| C  | -2.43161 | -3.17001 | 0.39592  |
| C  | -0.19431 | -3.06221 | -1.20314 |
| N  | -0.46063 | -1.97207 | -0.40658 |
| C  | 0.56448  | -1.09478 | -0.52428 |
| N  | 1.40530  | -1.72004 | -1.36117 |
| N  | 0.95292  | -2.93998 | -1.80085 |
| C  | -1.84740 | -3.93668 | 1.59640  |
| C  | -1.49963 | -2.81664 | 2.53465  |
| C  | -1.42552 | -1.59821 | 1.85056  |
| C  | -1.15703 | -0.41295 | 2.52604  |
| C  | -0.92361 | -0.46135 | 3.89778  |
| C  | -0.98039 | -1.67734 | 4.57826  |
| C  | -1.27854 | -2.86016 | 3.90494  |
| C  | 2.66478  | -1.21941 | -1.80781 |
| C  | 3.85085  | -1.78360 | -1.26593 |
| C  | 5.09797  | -1.20311 | -1.63521 |
| C  | 5.11470  | -0.11899 | -2.54505 |
| C  | 3.95813  | 0.38512  | -3.07841 |
| C  | 2.71990  | -0.17314 | -2.70225 |
| C  | 3.84221  | -2.87022 | -0.35878 |
| C  | 5.01839  | -3.34757 | 0.16447  |
| C  | 6.25495  | -2.76801 | -0.19250 |
| C  | 6.29050  | -1.72023 | -1.07641 |
| H  | -2.27736 | -1.01435 | -0.09168 |
| H  | -3.48945 | -2.95909 | 0.60743  |
| H  | -0.94865 | -4.50869 | 1.31715  |
| H  | -2.56184 | -4.65843 | 2.01011  |
| H  | -1.12901 | 0.54238  | 1.99870  |
| H  | -0.70256 | 0.45487  | 4.44124  |
| H  | -0.80165 | -1.70047 | 5.65151  |
| H  | -1.34158 | -3.80272 | 4.44723  |
| H  | 6.07416  | 0.31528  | -2.82356 |
| H  | 3.97006  | 1.21294  | -3.78252 |
| Cl | 1.27027  | 0.50115  | -3.38543 |
| H  | 2.89617  | -3.33650 | -0.08915 |
| H  | 4.99896  | -4.18872 | 0.85489  |

---

|    |          |          |          |
|----|----------|----------|----------|
| H  | 7.17778  | -3.16035 | 0.22936  |
| H  | 7.23845  | -1.26771 | -1.36561 |
| Au | 0.70907  | 1.01182  | 0.02074  |
| C  | 0.96727  | 3.02733  | 0.31743  |
| C  | 2.07358  | 3.37820  | 1.11038  |
| C  | 0.18167  | 4.00419  | -0.27184 |
| C  | 2.34726  | 4.72455  | 1.33945  |
| C  | 0.46745  | 5.35280  | -0.03745 |
| H  | -0.63981 | 3.74036  | -0.93698 |
| C  | 1.53963  | 5.70682  | 0.77239  |
| H  | 3.19892  | 5.01597  | 1.95387  |
| H  | -0.14729 | 6.12385  | -0.49871 |
| H  | 1.75943  | 6.75698  | 0.95514  |
| C  | 2.38126  | 0.97982  | 1.19114  |
| C  | 2.98230  | -0.19294 | 1.60832  |
| C  | 2.84636  | 2.24102  | 1.60070  |
| C  | 4.11550  | -0.11993 | 2.42270  |
| H  | 2.59173  | -1.16462 | 1.31282  |
| C  | 3.97335  | 2.29045  | 2.41945  |
| C  | 4.60711  | 1.11761  | 2.82027  |
| H  | 4.60294  | -1.03861 | 2.74473  |
| H  | 4.36013  | 3.25356  | 2.75166  |
| H  | 5.48908  | 1.17246  | 3.45552  |
| O  | -1.28647 | 1.10013  | -1.03893 |
| C  | -3.60141 | 1.49333  | -1.04663 |
| C  | -2.29200 | 1.69036  | -0.57245 |
| C  | -6.02062 | 1.98311  | -0.76541 |
| C  | -4.66643 | 2.14738  | -0.45088 |
| C  | -6.47870 | 1.10703  | -1.75799 |
| H  | -2.16115 | 2.40761  | 0.26467  |
| H  | -4.42588 | 2.84014  | 0.36066  |
| H  | -3.72591 | 0.82449  | -1.89814 |
| C  | -7.86347 | 1.27321  | -2.31284 |
| H  | -5.74311 | 0.76684  | -2.48931 |
| H  | -6.75458 | 2.55934  | -0.20091 |
| H  | -7.85755 | 2.09560  | -3.04154 |

---

|   |          |          |          |
|---|----------|----------|----------|
| H | -8.22264 | 0.38097  | -2.83760 |
| H | -8.59136 | 1.53820  | -1.53579 |
| C | -6.61901 | -0.75236 | -0.84235 |
| C | -5.32317 | -1.09287 | -0.45309 |
| C | -5.09043 | -0.63634 | 0.87301  |
| C | -6.24612 | -0.10364 | 1.36816  |
| C | -7.35781 | -0.36705 | 0.41597  |
| H | -7.11791 | -1.24650 | -1.67487 |
| H | -4.59272 | -1.59608 | -1.08603 |
| H | -4.13101 | -0.65701 | 1.38948  |
| H | -6.37585 | 0.34617  | 2.34822  |
| H | -7.91326 | -1.25621 | 0.76538  |
| H | -8.09633 | 0.43639  | 0.32536  |
| C | -1.15576 | -4.19661 | -1.30988 |
| H | -1.26230 | -4.49591 | -2.35784 |
| H | -0.77456 | -5.07223 | -0.75796 |
| O | -2.42890 | -3.81102 | -0.85417 |

M06/lanl2dz-6-31G(d) Energy = -2646.115039

M06/lanl2dz-6-31G(d) Free Energy = -2645.475921

M06/def2-TZVP Derived free energy = -2646.587187

M06/def2-TZVP Derived free energy in solution (toluene) = -2646.618037

M06/def2-TZVP Derived free energy in solution (nitromethane) = -2646.642416

Number of Imaginary Frequencies = 1 (-398.19)

M06/lanl2dz-6-31G(d) Geometry

|   |          |          |          |
|---|----------|----------|----------|
| C | -1.69721 | -1.81300 | 0.38917  |
| C | -2.43160 | -3.17001 | 0.39591  |
| C | -0.19431 | -3.06221 | -1.20315 |
| N | -0.46063 | -1.97207 | -0.40659 |
| C | 0.56448  | -1.09478 | -0.52429 |
| N | 1.40530  | -1.72004 | -1.36118 |
| N | 0.95293  | -2.93998 | -1.80086 |
| C | -1.84739 | -3.93668 | 1.59638  |
| C | -1.49962 | -2.81664 | 2.53464  |
| C | -1.42552 | -1.59821 | 1.85055  |

---

|    |          |          |          |
|----|----------|----------|----------|
| C  | -1.15703 | -0.41295 | 2.52603  |
| C  | -0.92361 | -0.46136 | 3.89777  |
| C  | -0.98038 | -1.67735 | 4.57824  |
| C  | -1.27852 | -2.86017 | 3.90493  |
| C  | 2.66478  | -1.21941 | -1.80780 |
| C  | 3.85085  | -1.78361 | -1.26592 |
| C  | 5.09798  | -1.20311 | -1.63519 |
| C  | 5.11471  | -0.11899 | -2.54502 |
| C  | 3.95814  | 0.38513  | -3.07839 |
| C  | 2.71991  | -0.17313 | -2.70224 |
| C  | 3.84220  | -2.87023 | -0.35877 |
| C  | 5.01837  | -3.34758 | 0.16448  |
| C  | 6.25494  | -2.76802 | -0.19248 |
| C  | 6.29050  | -1.72024 | -1.07638 |
| H  | -2.27736 | -1.01435 | -0.09169 |
| H  | -3.48945 | -2.95910 | 0.60742  |
| H  | -0.94864 | -4.50869 | 1.31713  |
| H  | -2.56183 | -4.65844 | 2.01010  |
| H  | -1.12902 | 0.54238  | 1.99869  |
| H  | -0.70256 | 0.45486  | 4.44123  |
| H  | -0.80163 | -1.70047 | 5.65150  |
| H  | -1.34157 | -3.80272 | 4.44722  |
| H  | 6.07418  | 0.31529  | -2.82352 |
| H  | 3.97008  | 1.21294  | -3.78250 |
| Cl | 1.27029  | 0.50116  | -3.38543 |
| H  | 2.89616  | -3.33651 | -0.08915 |
| H  | 4.99894  | -4.18874 | 0.85490  |
| H  | 7.17777  | -3.16036 | 0.22939  |
| H  | 7.23845  | -1.26772 | -1.36557 |
| Au | 0.70907  | 1.01182  | 0.02073  |
| C  | 0.96726  | 3.02733  | 0.31742  |
| C  | 2.07357  | 3.37820  | 1.11038  |
| C  | 0.18167  | 4.00420  | -0.27185 |
| C  | 2.34724  | 4.72456  | 1.33945  |
| C  | 0.46745  | 5.35280  | -0.03747 |
| H  | -0.63981 | 3.74036  | -0.93700 |



---

|   |          |          |          |
|---|----------|----------|----------|
| C | 1.53962  | 5.70683  | 0.77238  |
| H | 3.19890  | 5.01598  | 1.95388  |
| H | -0.14729 | 6.12385  | -0.49873 |
| H | 1.75942  | 6.75699  | 0.95513  |
| C | 2.38126  | 0.97983  | 1.19114  |
| C | 2.98229  | -0.19293 | 1.60833  |
| C | 2.84635  | 2.24102  | 1.60071  |
| C | 4.11548  | -0.11993 | 2.42271  |
| H | 2.59172  | -1.16462 | 1.31282  |
| C | 3.97333  | 2.29046  | 2.41946  |
| C | 4.60709  | 1.11762  | 2.82028  |
| H | 4.60293  | -1.03861 | 2.74475  |
| H | 4.36011  | 3.25357  | 2.75167  |
| H | 5.48906  | 1.17247  | 3.45554  |
| O | -1.28647 | 1.10013  | -1.03895 |
| C | -3.60141 | 1.49332  | -1.04663 |
| C | -2.29200 | 1.69036  | -0.57246 |
| C | -6.02062 | 1.98310  | -0.76540 |
| C | -4.66643 | 2.14737  | -0.45087 |
| C | -6.47870 | 1.10702  | -1.75798 |
| H | -2.16115 | 2.40760  | 0.26466  |
| H | -4.42587 | 2.84014  | 0.36065  |
| H | -3.72591 | 0.82448  | -1.89813 |
| C | -7.86348 | 1.27321  | -2.31282 |
| H | -5.74312 | 0.76682  | -2.48930 |
| H | -6.75458 | 2.55934  | -0.20091 |
| H | -7.85756 | 2.09558  | -3.04154 |
| H | -8.22266 | 0.38095  | -2.83755 |
| H | -8.59136 | 1.53821  | -1.53577 |
| C | -6.61902 | -0.75237 | -0.84233 |
| C | -5.32318 | -1.09288 | -0.45307 |
| C | -5.09042 | -0.63634 | 0.87302  |
| C | -6.24611 | -0.10363 | 1.36817  |
| C | -7.35781 | -0.36704 | 0.41599  |
| H | -7.11793 | -1.24651 | -1.67485 |
| H | -4.59273 | -1.59610 | -1.08602 |

---

|   |          |          |          |
|---|----------|----------|----------|
| H | -4.13101 | -0.65702 | 1.38948  |
| H | -6.37583 | 0.34619  | 2.34823  |
| H | -7.91326 | -1.25620 | 0.76541  |
| H | -8.09633 | 0.43640  | 0.32538  |
| C | -1.15576 | -4.19660 | -1.30989 |
| H | -1.26231 | -4.49590 | -2.35786 |
| H | -0.77455 | -5.07223 | -0.75798 |
| O | -2.42890 | -3.81102 | -0.85418 |

Bottom, towards, 2, exo, towards

M06/lanl2dz-6-31G(d) Energy = -2646.114073

M06/lanl2dz-6-31G(d) Free Energy = -2645.476611

M06/def2-TZVP Derived free energy = -2646.587840

M06/def2-TZVP Derived free energy in solution (toluene) = -2646.618718

M06/def2-TZVP Derived free energy in solution (nitromethane) = -2646.643592

Number of Imaginary Frequencies = 1 (-362.24)

M06/lanl2dz-6-31G(d) Geometry

|   |          |          |          |
|---|----------|----------|----------|
| C | 0.00479  | 3.04252  | -0.17828 |
| C | 0.05245  | 4.50715  | -0.67035 |
| C | -2.20107 | 3.04860  | -1.35911 |
| N | -1.19951 | 2.38308  | -0.69134 |
| C | -1.50937 | 1.06531  | -0.65338 |
| N | -2.68252 | 1.00962  | -1.30583 |
| N | -3.12846 | 2.23086  | -1.75338 |
| C | 0.90239  | 5.21938  | 0.37667  |
| C | 0.64788  | 4.42598  | 1.62824  |
| C | 0.10336  | 3.17756  | 1.32036  |
| C | -0.21213 | 2.26817  | 2.32138  |
| C | 0.02320  | 2.62798  | 3.64749  |
| C | 0.56939  | 3.87187  | 3.95742  |
| C | 0.88668  | 4.77933  | 2.94870  |
| C | -3.45319 | -0.16019 | -1.57346 |
| C | -4.72184 | -0.30224 | -0.94536 |
| C | -5.44538 | -1.51060 | -1.16145 |

---

|    |          |          |          |
|----|----------|----------|----------|
| C  | -4.89655 | -2.50687 | -2.00328 |
| C  | -3.68595 | -2.33320 | -2.61954 |
| C  | -2.96100 | -1.14423 | -2.40412 |
| C  | -5.28038 | 0.68644  | -0.09894 |
| C  | -6.49515 | 0.47855  | 0.50635  |
| C  | -7.21134 | -0.71933 | 0.29673  |
| C  | -6.69510 | -1.69013 | -0.52249 |
| H  | 0.85664  | 2.48470  | -0.59178 |
| H  | 0.45121  | 4.58340  | -1.69713 |
| H  | 0.60944  | 6.27403  | 0.44799  |
| H  | 1.96419  | 5.19148  | 0.08905  |
| H  | -0.65187 | 1.29661  | 2.09267  |
| H  | -0.22818 | 1.93220  | 4.44554  |
| H  | 0.74232  | 4.14002  | 4.99801  |
| H  | 1.30140  | 5.75624  | 3.19433  |
| H  | -5.45891 | -3.42620 | -2.16234 |
| H  | -3.26889 | -3.09117 | -3.27752 |
| Cl | -1.43588 | -0.95967 | -3.22148 |
| H  | -4.75061 | 1.62373  | 0.05722  |
| H  | -6.91399 | 1.24980  | 1.14991  |
| H  | -8.17469 | -0.86548 | 0.78064  |
| H  | -7.23834 | -2.61830 | -0.69727 |
| Au | -0.30882 | -0.62472 | 0.01308  |
| C  | 0.74670  | -2.32063 | 0.51497  |
| C  | 0.12298  | -3.14717 | 1.46642  |
| C  | 1.94883  | -2.70396 | -0.06219 |
| C  | 0.74275  | -4.33252 | 1.85749  |
| C  | 2.55735  | -3.90001 | 0.33117  |
| H  | 2.41701  | -2.09929 | -0.83912 |
| C  | 1.95997  | -4.70426 | 1.29508  |
| H  | 0.27196  | -4.97995 | 2.59690  |
| H  | 3.49384  | -4.21035 | -0.13336 |
| H  | 2.43464  | -5.63482 | 1.60052  |
| C  | -1.59964 | -1.44659 | 1.37053  |
| C  | -2.79043 | -0.85217 | 1.74612  |
| C  | -1.16910 | -2.65755 | 1.94002  |

---

|   |          |          |          |
|---|----------|----------|----------|
| C | -3.60625 | -1.48998 | 2.68422  |
| H | -3.10432 | 0.10117  | 1.32791  |
| C | -1.99331 | -3.27390 | 2.88042  |
| C | -3.20680 | -2.69713 | 3.24379  |
| H | -4.55180 | -1.03201 | 2.97007  |
| H | -1.68659 | -4.21516 | 3.33564  |
| H | -3.84128 | -3.19435 | 3.97485  |
| O | 1.31559  | 0.20838  | -1.28644 |
| C | 3.64330  | 0.57982  | -1.43240 |
| C | 2.44396  | 0.37578  | -0.74401 |
| C | 6.12410  | 0.71961  | -1.22862 |
| C | 4.82692  | 0.64066  | -0.71512 |
| C | 7.26473  | 0.87001  | -0.41480 |
| H | 2.51431  | 0.34172  | 0.36388  |
| H | 4.74014  | 0.62005  | 0.37847  |
| H | 3.63381  | 0.60537  | -2.52233 |
| C | 8.51139  | 1.45815  | -1.02081 |
| H | 7.06880  | 1.18978  | 0.61161  |
| H | 6.25189  | 0.69909  | -2.31414 |
| H | 8.76578  | 0.96943  | -1.97058 |
| H | 8.34734  | 2.52272  | -1.23539 |
| H | 9.37711  | 1.38852  | -0.35349 |
| C | 7.92560  | -0.99348 | 0.02962  |
| C | 7.01460  | -1.43477 | 0.99649  |
| C | 5.90035  | -2.02656 | 0.36242  |
| C | 6.14696  | -2.08355 | -0.98771 |
| C | 7.56286  | -1.71421 | -1.24488 |
| H | 8.96030  | -0.76258 | 0.28005  |
| H | 7.10122  | -1.24988 | 2.06458  |
| H | 4.97625  | -2.32995 | 0.85070  |
| H | 5.45860  | -2.44773 | -1.74680 |
| H | 8.16047  | -2.64323 | -1.28096 |
| H | 7.75256  | -1.18250 | -2.18268 |
| O | -1.24036 | 5.07756  | -0.61997 |
| C | -2.10825 | 4.52107  | -1.56906 |
| H | -3.09097 | 4.98811  | -1.44707 |

---

H -1.76006 4.72760 -2.59801

M06/lanl2dz-6-31G(d) Energy = -2646.111520

M06/lanl2dz-6-31G(d) Free Energy = -2645.476543

M06/def2-TZVP Derived free energy = -2646.587704

M06/def2-TZVP Derived free energy in solution (toluene) = -2646.618332

M06/def2-TZVP Derived free energy in solution (nitromethane) = -2646.642955

Number of Imaginary Frequencies = 1 (-368.83)

M06/lanl2dz-6-31G(d) Geometry

|   |          |          |          |
|---|----------|----------|----------|
| C | 0.37256  | 2.93587  | 0.22322  |
| C | 0.32562  | 4.47297  | 0.09723  |
| C | -1.35819 | 3.12452  | -1.60255 |
| N | -0.68293 | 2.38557  | -0.65820 |
| C | -1.16459 | 1.12134  | -0.67970 |
| N | -2.11820 | 1.17353  | -1.62160 |
| N | -2.25464 | 2.40605  | -2.21062 |
| C | -0.71904 | 4.92633  | 1.13364  |
| C | -0.59360 | 3.86239  | 2.18586  |
| C | 0.05196  | 2.73096  | 1.67610  |
| C | 0.32204  | 1.63605  | 2.48761  |
| C | -0.09950 | 1.66302  | 3.81427  |
| C | -0.76002 | 2.78253  | 4.31919  |
| C | -1.00137 | 3.89295  | 3.51333  |
| C | -2.97190 | 0.09553  | -2.00132 |
| C | -4.31990 | 0.10613  | -1.55115 |
| C | -5.12619 | -1.03629 | -1.82202 |
| C | -4.57572 | -2.11320 | -2.55741 |
| C | -3.28506 | -2.08110 | -3.01451 |
| C | -2.47591 | -0.96305 | -2.72980 |
| C | -4.88041 | 1.18235  | -0.82180 |
| C | -6.17463 | 1.11498  | -0.36894 |
| C | -6.97035 | -0.02296 | -0.62163 |
| C | -6.45511 | -1.07275 | -1.33772 |
| H | 1.32753  | 2.51122  | -0.10994 |
| H | 1.30900  | 4.84787  | 0.40790  |

---

|    |          |          |          |
|----|----------|----------|----------|
| H  | -1.73435 | 4.94122  | 0.70659  |
| H  | -0.51975 | 5.93994  | 1.50155  |
| H  | 0.86189  | 0.76984  | 2.10225  |
| H  | 0.09707  | 0.81060  | 4.46113  |
| H  | -1.07736 | 2.79432  | 5.36017  |
| H  | -1.49538 | 4.77374  | 3.92171  |
| H  | -5.20196 | -2.98051 | -2.76329 |
| H  | -2.86405 | -2.90299 | -3.58776 |
| Cl | -0.83558 | -0.96323 | -3.30310 |
| H  | -4.28258 | 2.07202  | -0.63201 |
| H  | -6.59568 | 1.95186  | 0.18518  |
| H  | -7.99387 | -0.05918 | -0.25491 |
| H  | -7.06039 | -1.95365 | -1.54920 |
| Au | -0.39458 | -0.72505 | 0.17593  |
| C  | 0.22257  | -2.59951 | 0.75171  |
| C  | -0.69422 | -3.31094 | 1.54673  |
| C  | 1.39759  | -3.19791 | 0.32642  |
| C  | -0.39225 | -4.61409 | 1.93532  |
| C  | 1.68887  | -4.50768 | 0.71961  |
| H  | 2.08689  | -2.67120 | -0.33325 |
| C  | 0.79933  | -5.20677 | 1.52638  |
| H  | -1.09042 | -5.18044 | 2.55136  |
| H  | 2.60959  | -4.98238 | 0.38343  |
| H  | 1.02668  | -6.22683 | 1.83037  |
| C  | -1.99706 | -1.28724 | 1.30677  |
| C  | -3.06784 | -0.44977 | 1.55873  |
| C  | -1.91389 | -2.57349 | 1.86593  |
| C  | -4.12144 | -0.91498 | 2.34986  |
| H  | -3.10311 | 0.55917  | 1.15245  |
| C  | -2.97157 | -3.01493 | 2.66014  |
| C  | -4.07127 | -2.19371 | 2.89166  |
| H  | -4.97888 | -0.26895 | 2.53225  |
| H  | -2.93690 | -4.00895 | 3.10544  |
| H  | -4.89229 | -2.55501 | 3.50800  |
| O  | 1.49733  | -0.06779 | -0.84696 |
| C  | 3.77715  | 0.50819  | -0.80302 |

---

|   |          |          |          |
|---|----------|----------|----------|
| C | 2.62377  | -0.09885 | -0.28686 |
| C | 6.19980  | 0.97718  | -0.51650 |
| C | 4.98091  | 0.40880  | -0.12898 |
| C | 7.35153  | 0.97019  | 0.29220  |
| H | 2.73395  | -0.63712 | 0.67832  |
| H | 4.97931  | -0.14748 | 0.81683  |
| H | 3.70251  | 1.04889  | -1.74765 |
| C | 8.36970  | 2.06487  | 0.11136  |
| H | 7.19304  | 0.67243  | 1.33176  |
| H | 6.23101  | 1.51841  | -1.46613 |
| H | 8.61410  | 2.21976  | -0.94788 |
| H | 7.96064  | 3.01065  | 0.49186  |
| H | 9.30003  | 1.86972  | 0.65572  |
| C | 8.46642  | -0.64009 | -0.26989 |
| C | 7.78908  | -1.70603 | 0.33008  |
| C | 6.76395  | -2.15769 | -0.52969 |
| C | 6.85736  | -1.47821 | -1.71904 |
| C | 8.12092  | -0.69646 | -1.73641 |
| H | 9.44579  | -0.31274 | 0.07576  |
| H | 7.95671  | -2.05992 | 1.34447  |
| H | 5.99985  | -2.88625 | -0.27326 |
| H | 6.18647  | -1.58108 | -2.56745 |
| H | 8.89457  | -1.30975 | -2.23363 |
| H | 8.08603  | 0.25679  | -2.27313 |
| C | -1.05755 | 4.56886  | -1.82102 |
| H | -0.96359 | 4.77166  | -2.89344 |
| H | -1.89359 | 5.18422  | -1.44644 |
| O | 0.16181  | 4.92378  | -1.22287 |

M06/lanl2dz-6-31G(d) Energy = -2646.110578

M06/lanl2dz-6-31G(d) Free Energy = -2645.474224

M06/def2-TZVP Derived free energy = -2646.584209

M06/def2-TZVP Derived free energy in solution (toluene) = -2646.614890

M06/def2-TZVP Derived free energy in solution (nitromethane) = -2646.639294

Number of Imaginary Frequencies = 1 (-362.46)

---

M06/lanl2dz-6-31G(d) Geometry

|    |          |          |          |
|----|----------|----------|----------|
| C  | -0.94983 | 2.59743  | -0.93881 |
| C  | -1.41843 | 4.05963  | -0.76561 |
| C  | -0.18556 | 2.95573  | 1.44014  |
| N  | -0.21296 | 2.20701  | 0.28612  |
| C  | 0.49225  | 1.07120  | 0.49654  |
| N  | 0.92770  | 1.21159  | 1.75832  |
| N  | 0.51435  | 2.37138  | 2.36641  |
| C  | -0.26826 | 4.92223  | -1.31594 |
| C  | 0.33503  | 4.01775  | -2.34991 |
| C  | -0.05720 | 2.69141  | -2.14442 |
| C  | 0.35525  | 1.68468  | -3.00972 |
| C  | 1.19785  | 2.01116  | -4.06863 |
| C  | 1.60019  | 3.33160  | -4.26587 |
| C  | 1.16444  | 4.34451  | -3.41509 |
| C  | 1.72964  | 0.27482  | 2.47464  |
| C  | 3.09868  | 0.57857  | 2.70453  |
| C  | 3.91177  | -0.41647 | 3.31955  |
| C  | 3.32872  | -1.64574 | 3.70870  |
| C  | 1.99737  | -1.89959 | 3.51092  |
| C  | 1.19325  | -0.92497 | 2.88821  |
| C  | 3.68870  | 1.80778  | 2.32456  |
| C  | 5.02699  | 2.02988  | 2.53495  |
| C  | 5.83781  | 1.04086  | 3.13257  |
| C  | 5.28776  | -0.15450 | 3.51866  |
| H  | -1.78416 | 1.89169  | -1.04031 |
| H  | -2.29299 | 4.19044  | -1.41476 |
| H  | 0.46760  | 5.16725  | -0.53386 |
| H  | -0.62892 | 5.87747  | -1.71601 |
| H  | 0.02007  | 0.65501  | -2.87800 |
| H  | 1.53307  | 1.23396  | -4.75218 |
| H  | 2.25020  | 3.57572  | -5.10397 |
| H  | 1.46427  | 5.37742  | -3.58763 |
| H  | 3.96066  | -2.39838 | 4.17865  |
| H  | 1.54563  | -2.83879 | 3.81932  |
| Cl | -0.49239 | -1.28506 | 2.64426  |



---

|    |          |          |          |
|----|----------|----------|----------|
| H  | 3.06999  | 2.58288  | 1.87595  |
| H  | 5.46748  | 2.98148  | 2.24338  |
| H  | 6.89650  | 1.23376  | 3.29203  |
| H  | 5.90053  | -0.92391 | 3.98711  |
| Au | 0.58518  | -0.78147 | -0.64056 |
| C  | 0.69590  | -2.64667 | -1.49480 |
| C  | 1.99526  | -3.08064 | -1.81268 |
| C  | -0.39227 | -3.48166 | -1.68847 |
| C  | 2.17535  | -4.34686 | -2.36428 |
| C  | -0.19970 | -4.75212 | -2.23954 |
| H  | -1.39552 | -3.16940 | -1.40015 |
| C  | 1.07843  | -5.17591 | -2.58245 |
| H  | 3.17478  | -4.69627 | -2.62287 |
| H  | -1.05305 | -5.40991 | -2.39596 |
| H  | 1.22609  | -6.16364 | -3.01520 |
| C  | 2.60128  | -0.91023 | -0.93278 |
| C  | 3.47207  | 0.12363  | -0.64131 |
| C  | 3.04570  | -2.11451 | -1.50440 |
| C  | 4.83885  | -0.05561 | -0.87110 |
| H  | 3.11201  | 1.06761  | -0.23664 |
| C  | 4.41266  | -2.27158 | -1.72891 |
| C  | 5.30270  | -1.25161 | -1.40525 |
| H  | 5.53295  | 0.74769  | -0.62947 |
| H  | 4.78883  | -3.19783 | -2.16255 |
| H  | 6.36761  | -1.39107 | -1.58164 |
| O  | -1.65823 | -0.62977 | -0.54760 |
| C  | -3.76629 | -0.55078 | -1.61152 |
| C  | -2.38376 | -0.78583 | -1.57211 |
| C  | -5.84081 | 0.11760  | -0.42376 |
| C  | -4.46616 | -0.11875 | -0.49367 |
| C  | -6.48000 | 0.68579  | 0.69538  |
| H  | -1.91277 | -1.13817 | -2.50904 |
| H  | -3.87492 | 0.07911  | 0.40679  |
| H  | -4.28783 | -0.73559 | -2.55028 |
| C  | -7.79303 | 1.39521  | 0.49547  |
| H  | -5.81787 | 1.16110  | 1.42289  |

---

|   |          |          |          |
|---|----------|----------|----------|
| H | -6.44670 | -0.11516 | -1.30440 |
| H | -8.48730 | 0.79689  | -0.10928 |
| H | -8.28537 | 1.64472  | 1.44166  |
| H | -7.62106 | 2.33735  | -0.04242 |
| C | -7.08700 | -0.85814 | 1.87698  |
| C | -5.90328 | -1.21331 | 2.53181  |
| C | -5.19651 | -2.15823 | 1.75534  |
| C | -5.97169 | -2.50562 | 0.67727  |
| C | -7.33124 | -1.92980 | 0.84491  |
| H | -7.90844 | -0.36939 | 2.39889  |
| H | -5.53381 | -0.75308 | 3.44512  |
| H | -4.18827 | -2.51125 | 1.95308  |
| H | -5.68584 | -3.18377 | -0.12203 |
| H | -7.83836 | -1.62717 | -0.07669 |
| H | -7.97114 | -2.69846 | 1.31575  |
| C | -0.89894 | 4.26103  | 1.53252  |
| H | -1.41072 | 4.33695  | 2.49791  |
| H | -0.17566 | 5.09260  | 1.48288  |
| O | -1.87720 | 4.35758  | 0.53055  |

M06/lanl2dz-6-31G(d) Energy = -2646.115650

M06/lanl2dz-6-31G(d) Free Energy = -2645.479172

M06/def2-TZVP Derived free energy = -2646.590894

M06/def2-TZVP Derived free energy in solution (toluene) = -2646.621557

M06/def2-TZVP Derived free energy in solution (nitromethane) = -2646.646225

Number of Imaginary Frequencies = 1 (-398.04)

M06/lanl2dz-6-31G(d) Geometry

|   |          |         |          |
|---|----------|---------|----------|
| C | 0.19398  | 3.05342 | -0.13619 |
| C | 0.32772  | 4.50432 | -0.65260 |
| C | -1.90586 | 3.09158 | -1.49661 |
| N | -0.98403 | 2.41685 | -0.73020 |
| C | -1.33790 | 1.11094 | -0.67951 |
| N | -2.45484 | 1.07085 | -1.42518 |
| N | -2.82430 | 2.28953 | -1.94220 |
| C | 1.10172  | 5.21956 | 0.44993  |

---

|    |          |          |          |
|----|----------|----------|----------|
| C  | 0.72590  | 4.45778  | 1.69071  |
| C  | 0.17646  | 3.21705  | 1.36222  |
| C  | -0.23853 | 2.33257  | 2.34938  |
| C  | -0.10235 | 2.71187  | 3.68368  |
| C  | 0.44613  | 3.94942  | 4.01498  |
| C  | 0.86570  | 4.83041  | 3.02025  |
| C  | -3.22946 | -0.09152 | -1.71311 |
| C  | -4.53372 | -0.20219 | -1.15705 |
| C  | -5.24497 | -1.42114 | -1.35395 |
| C  | -4.65038 | -2.45630 | -2.11370 |
| C  | -3.40834 | -2.30939 | -2.67210 |
| C  | -2.69436 | -1.11170 | -2.47042 |
| C  | -5.13816 | 0.82716  | -0.39523 |
| C  | -6.38405 | 0.64634  | 0.15267  |
| C  | -7.08502 | -0.56498 | -0.03069 |
| C  | -6.52547 | -1.57388 | -0.77178 |
| H  | 1.06048  | 2.46322  | -0.46709 |
| H  | 0.81833  | 4.54470  | -1.64105 |
| H  | 0.82693  | 6.28118  | 0.47597  |
| H  | 2.18317  | 5.16459  | 0.25440  |
| H  | -0.67927 | 1.36607  | 2.10030  |
| H  | -0.43321 | 2.03718  | 4.47072  |
| H  | 0.53956  | 4.23405  | 5.06127  |
| H  | 1.28309  | 5.80175  | 3.28267  |
| H  | -5.20247 | -3.38444 | -2.25672 |
| H  | -2.95561 | -3.09785 | -3.26764 |
| Cl | -1.12150 | -0.96690 | -3.20394 |
| H  | -4.61760 | 1.77311  | -0.26047 |
| H  | -6.84014 | 1.44946  | 0.72839  |
| H  | -8.07143 | -0.69102 | 0.41058  |
| H  | -7.05720 | -2.51218 | -0.92659 |
| Au | -0.28910 | -0.63520 | 0.10674  |
| C  | 0.59492  | -2.40857 | 0.64562  |
| C  | -0.16116 | -3.21783 | 1.50973  |
| C  | 1.80196  | -2.85729 | 0.13195  |
| C  | 0.33537  | -4.46527 | 1.88414  |

---

|   |          |          |          |
|---|----------|----------|----------|
| C | 2.28545  | -4.11452 | 0.50762  |
| H | 2.36344  | -2.25130 | -0.57946 |
| C | 1.55794  | -4.90790 | 1.38748  |
| H | -0.23694 | -5.10574 | 2.55487  |
| H | 3.22899  | -4.47683 | 0.09880  |
| H | 1.93661  | -5.88538 | 1.67998  |
| C | -1.73799 | -1.38709 | 1.34238  |
| C | -2.89875 | -0.70526 | 1.65645  |
| C | -1.44133 | -2.64042 | 1.90806  |
| C | -3.81987 | -1.29233 | 2.52837  |
| H | -3.11241 | 0.27545  | 1.23578  |
| C | -2.37094 | -3.20591 | 2.77939  |
| C | -3.55464 | -2.53838 | 3.08236  |
| H | -4.74467 | -0.76545 | 2.75996  |
| H | -2.16960 | -4.17685 | 3.23151  |
| H | -4.27116 | -2.99471 | 3.76256  |
| O | 1.55866  | 0.05300  | -0.98108 |
| C | 3.85964  | 0.51025  | -0.76858 |
| C | 2.55151  | 0.38252  | -0.27795 |
| C | 6.24312  | 0.98215  | -0.24464 |
| C | 4.88391  | 0.91400  | 0.07579  |
| C | 6.76043  | 0.56425  | -1.47681 |
| H | 2.40341  | 0.58810  | 0.80417  |
| H | 4.60076  | 1.18126  | 1.09809  |
| H | 4.01999  | 0.29880  | -1.82543 |
| C | 8.13759  | 0.98911  | -1.89349 |
| H | 6.05271  | 0.46703  | -2.30197 |
| H | 6.93775  | 1.33306  | 0.51942  |
| H | 8.83459  | 1.01708  | -1.04657 |
| H | 8.56376  | 0.34976  | -2.67464 |
| H | 8.08733  | 2.00780  | -2.30296 |
| C | 7.00141  | -1.50791 | -1.28887 |
| C | 5.72727  | -2.02773 | -1.06506 |
| C | 5.47350  | -2.08548 | 0.33182  |
| C | 6.60263  | -1.71086 | 1.00127  |
| C | 7.72314  | -1.55599 | 0.03579  |

---

|   |          |          |          |
|---|----------|----------|----------|
| H | 7.52153  | -1.63965 | -2.23655 |
| H | 5.01520  | -2.30485 | -1.83979 |
| H | 4.51737  | -2.33927 | 0.78434  |
| H | 6.71268  | -1.63468 | 2.07920  |
| H | 8.41212  | -0.73219 | 0.25038  |
| H | 8.33193  | -2.47777 | 0.05618  |
| C | -1.74586 | 4.55318  | -1.73921 |
| H | -1.30074 | 4.71674  | -2.73821 |
| H | -2.71873 | 5.05463  | -1.71862 |
| O | -0.94663 | 5.11131  | -0.73201 |

### Major Endo product

B3LYP/lanl2dz-6-31G(d) Energy = -2647.680522

B3LYP/lanl2dz-6-31G(d) Free Energy = -2647.044305

M06/def2-TZVP Derived free energy = -2646.585124

Number of Imaginary Frequencies = 1 (-354.40)

### B3LYP/lanl2dz-6-31G(d) Geometry

|   |          |          |          |
|---|----------|----------|----------|
| C | 3.44663  | -1.86897 | 0.01328  |
| C | 4.75034  | -2.50488 | 0.57766  |
| C | 2.93515  | -1.46684 | 2.43773  |
| N | 2.68553  | -1.23033 | 1.10234  |
| C | 1.65285  | -0.35197 | 1.00176  |
| N | 1.32136  | -0.11793 | 2.28548  |
| N | 2.11173  | -0.79895 | 3.19344  |
| C | 5.10340  | -3.58481 | -0.45623 |
| C | 3.74945  | -4.00089 | -0.99228 |
| C | 2.77613  | -3.03954 | -0.68906 |
| C | 1.44730  | -3.21392 | -1.06798 |
| C | 1.10406  | -4.37512 | -1.76968 |
| C | 2.07301  | -5.33179 | -2.08503 |
| C | 3.40410  | -5.15100 | -1.69635 |
| C | 0.21329  | 0.64861  | 2.77747  |
| C | 0.31600  | 2.06953  | 2.87846  |
| C | -0.80904 | 2.79371  | 3.39585  |
| C | -1.96443 | 2.07858  | 3.80585  |

---

|    |          |          |          |
|----|----------|----------|----------|
| C  | -2.02892 | 0.70874  | 3.71651  |
| C  | -0.92812 | -0.01183 | 3.19816  |
| C  | 1.47797  | 2.79389  | 2.50246  |
| C  | 1.51675  | 4.16611  | 2.61845  |
| C  | 0.40344  | 4.88297  | 3.11735  |
| C  | -0.73316 | 4.20789  | 3.49963  |
| H  | 3.69778  | -1.07466 | -0.69949 |
| H  | 5.54398  | -1.75973 | 0.73280  |
| H  | 5.66254  | -4.39687 | 0.01838  |
| H  | 5.73884  | -3.15920 | -1.24470 |
| H  | 0.67904  | -2.48824 | -0.81835 |
| H  | 0.07181  | -4.53400 | -2.06831 |
| H  | 1.78898  | -6.22846 | -2.62855 |
| H  | 4.15212  | -5.90394 | -1.93006 |
| H  | -2.80762 | 2.63314  | 4.20912  |
| H  | -2.90669 | 0.16293  | 4.04345  |
| Cl | -1.05267 | -1.75016 | 3.10635  |
| H  | 2.34163  | 2.26273  | 2.12235  |
| H  | 2.41393  | 4.70296  | 2.32503  |
| H  | 0.45236  | 5.96427  | 3.20233  |
| H  | -1.59033 | 4.74745  | 3.89359  |
| Au | 0.86745  | 0.55422  | -0.80039 |
| C  | 0.20318  | 1.42379  | -2.54106 |
| C  | 1.07920  | 2.38251  | -3.09077 |
| C  | -0.98966 | 1.11255  | -3.18435 |
| C  | 0.72423  | 3.04067  | -4.27257 |
| C  | -1.33435 | 1.77570  | -4.37127 |
| H  | -1.65386 | 0.35086  | -2.79003 |
| C  | -0.48249 | 2.74004  | -4.90756 |
| H  | 1.38637  | 3.78364  | -4.70857 |
| H  | -2.26515 | 1.53024  | -4.87587 |
| H  | -0.75014 | 3.25355  | -5.82661 |
| C  | 2.47190  | 1.75899  | -1.19414 |
| C  | 3.62034  | 1.82698  | -0.41349 |
| C  | 2.32781  | 2.56713  | -2.34243 |
| C  | 4.65117  | 2.71050  | -0.76620 |

---

|   |          |          |          |
|---|----------|----------|----------|
| H | 3.73588  | 1.21181  | 0.47208  |
| C | 3.36592  | 3.44442  | -2.67728 |
| C | 4.51967  | 3.51658  | -1.89481 |
| H | 5.54757  | 2.76276  | -0.15454 |
| H | 3.27686  | 4.07498  | -3.55726 |
| H | 5.31547  | 4.20249  | -2.17025 |
| O | -0.93493 | -0.70496 | -0.52192 |
| C | -3.22222 | -1.07955 | -0.09747 |
| C | -2.08767 | -0.26248 | -0.22824 |
| C | -5.64891 | -1.25320 | 0.42935  |
| C | -4.46034 | -0.53672 | 0.22669  |
| C | -6.84152 | -0.67717 | 0.94617  |
| H | -2.21698 | 0.81906  | -0.07186 |
| H | -4.50013 | 0.54430  | 0.38005  |
| H | -3.10290 | -2.15036 | -0.24160 |
| C | -7.70910 | -1.50151 | 1.88088  |
| H | -6.73681 | 0.36333  | 1.26007  |
| H | -5.61492 | -2.33314 | 0.30067  |
| H | -7.82454 | -2.52829 | 1.51996  |
| H | -7.23797 | -1.55018 | 2.87041  |
| H | -8.70474 | -1.06508 | 2.01096  |
| C | -8.04514 | -0.24308 | -0.57873 |
| C | -8.39157 | -1.49728 | -1.12714 |
| C | -7.41441 | -1.88737 | -2.07289 |
| C | -6.52374 | -0.84928 | -2.24423 |
| C | -7.05454 | 0.36946  | -1.55563 |
| H | -8.78207 | 0.37023  | -0.06661 |
| H | -9.22017 | -2.11478 | -0.79799 |
| H | -7.35616 | -2.85941 | -2.54944 |
| H | -5.65116 | -0.85672 | -2.88707 |
| H | -6.30173 | 1.03630  | -1.13235 |
| H | -7.63278 | 0.95831  | -2.28775 |
| C | 4.09187  | -2.32724 | 2.85722  |
| H | 4.92951  | -1.68132 | 3.16938  |
| H | 3.81252  | -2.95527 | 3.70616  |
| O | 4.47380  | -3.18424 | 1.80199  |

---

**Minor Endo product**

B3LYP/lanl2dz-6-31G(d) Energy = -2647.681910

B3LYP/lanl2dz-6-31G(d) Free Energy = -2647.044844

M06/def2-TZVP Derived free energy = -2646.584476

Number of Imaginary Frequencies = 1 (-347.88)

## B3LYP/lanl2dz-6-31G(d) Geometry

|   |          |          |          |
|---|----------|----------|----------|
| C | -0.55949 | 3.03026  | -0.43091 |
| C | -0.22566 | 4.25343  | -1.33419 |
| C | -1.45297 | 2.07222  | -2.57200 |
| N | -1.06735 | 1.91904  | -1.25929 |
| C | -1.20196 | 0.61003  | -0.91283 |
| N | -1.68173 | 0.04368  | -2.03923 |
| N | -1.84005 | 0.93852  | -3.08306 |
| C | -0.31140 | 5.45140  | -0.37633 |
| C | -1.34423 | 5.00663  | 0.63772  |
| C | -1.52311 | 3.61781  | 0.58893  |
| C | -2.42993 | 2.98263  | 1.43367  |
| C | -3.16412 | 3.76012  | 2.33582  |
| C | -2.98385 | 5.14511  | 2.39089  |
| C | -2.07107 | 5.77760  | 1.54101  |
| C | -2.01827 | -1.33121 | -2.26583 |
| C | -3.39438 | -1.69408 | -2.40180 |
| C | -3.71305 | -3.07509 | -2.61324 |
| C | -2.66240 | -4.02561 | -2.69746 |
| C | -1.34582 | -3.64626 | -2.60025 |
| C | -1.02598 | -2.28503 | -2.39522 |
| C | -4.45561 | -0.75102 | -2.34020 |
| C | -5.76504 | -1.16113 | -2.46910 |
| C | -6.08140 | -2.52630 | -2.66618 |
| C | -5.07401 | -3.46084 | -2.73824 |
| H | 0.35258  | 2.65705  | 0.04640  |
| H | 0.75022  | 4.14814  | -1.82995 |
| H | -0.58684 | 6.35720  | -0.92508 |
| H | 0.66533  | 5.63065  | 0.09332  |



---

|    |          |          |          |
|----|----------|----------|----------|
| H  | -2.58166 | 1.90841  | 1.39974  |
| H  | -3.88021 | 3.28075  | 2.99692  |
| H  | -3.56223 | 5.73646  | 3.09496  |
| H  | -1.94182 | 6.85605  | 1.57897  |
| H  | -2.91160 | -5.07136 | -2.85470 |
| H  | -0.54345 | -4.36992 | -2.68642 |
| Cl | 0.66834  | -1.84400 | -2.35731 |
| H  | -4.23172 | 0.30189  | -2.21238 |
| H  | -6.56362 | -0.42611 | -2.42704 |
| H  | -7.11877 | -2.83062 | -2.76668 |
| H  | -5.30422 | -4.51103 | -2.89590 |
| Au | -0.46666 | -0.26235 | 0.94546  |
| C  | 0.27205  | -1.07421 | 2.68228  |
| C  | -0.65888 | -1.83072 | 3.42392  |
| C  | 1.57495  | -0.91745 | 3.14131  |
| C  | -0.24772 | -2.46058 | 4.60282  |
| C  | 1.97533  | -1.54757 | 4.32891  |
| H  | 2.28474  | -0.29890 | 2.60241  |
| C  | 1.06855  | -2.32374 | 5.04909  |
| H  | -0.95084 | -3.05109 | 5.18375  |
| H  | 2.99304  | -1.42308 | 4.68948  |
| H  | 1.37956  | -2.81363 | 5.96741  |
| C  | -2.18627 | -1.07440 | 1.69025  |
| C  | -3.43392 | -0.92051 | 1.10399  |
| C  | -2.01818 | -1.82491 | 2.87314  |
| C  | -4.54877 | -1.54423 | 1.68344  |
| H  | -3.56501 | -0.33133 | 0.20547  |
| C  | -3.14149 | -2.44395 | 3.43256  |
| C  | -4.39811 | -2.30777 | 2.83887  |
| H  | -5.52434 | -1.43107 | 1.21950  |
| H  | -3.03973 | -3.02699 | 4.34354  |
| H  | -5.25998 | -2.79426 | 3.28649  |
| O  | 1.48430  | 0.62013  | 0.28303  |
| C  | 3.68919  | 0.44424  | -0.54836 |
| C  | 2.49395  | -0.08213 | -0.03181 |
| C  | 5.96636  | -0.01591 | -1.45530 |

---

|   |          |          |          |
|---|----------|----------|----------|
| C | 4.74641  | -0.39715 | -0.88040 |
| C | 6.92473  | -0.94205 | -1.95164 |
| H | 2.44222  | -1.17100 | 0.11070  |
| H | 4.58951  | -1.46633 | -0.71984 |
| H | 3.76274  | 1.51856  | -0.69908 |
| C | 7.70831  | -0.58924 | -3.20363 |
| H | 6.59323  | -1.98204 | -1.92984 |
| H | 6.13126  | 1.04357  | -1.64088 |
| H | 8.05075  | 0.45015  | -3.18347 |
| H | 8.57853  | -1.23912 | -3.34076 |
| H | 7.06454  | -0.70952 | -4.08366 |
| C | 8.32238  | -1.21240 | -0.56345 |
| C | 8.96838  | 0.03892  | -0.46016 |
| C | 8.28064  | 0.85259  | 0.47081  |
| C | 7.29157  | 0.10236  | 1.06989  |
| C | 7.46676  | -1.33400 | 0.68716  |
| H | 8.83305  | -2.07617 | -0.98142 |
| H | 9.79993  | 0.36451  | -1.07565 |
| H | 8.47729  | 1.90357  | 0.65003  |
| H | 6.58139  | 0.45563  | 1.80855  |
| H | 8.08032  | -1.82686 | 1.46032  |
| H | 6.54633  | -1.91229 | 0.59335  |
| O | -1.24837 | 4.43989  | -2.31249 |
| C | -1.31913 | 3.39812  | -3.26238 |
| H | -0.42274 | 3.38116  | -3.90454 |
| H | -2.18722 | 3.58969  | -3.89741 |

**Major Endo product (optimized with ultrafine grid)**

M06/lanl2dz-6-31G(d) Energy = -2646.117300

M06/lanl2dz-6-31G(d) Free Energy = -2645.483204

M06/def2-TZVP Derived free energy = -2646.593843

Number of Imaginary Frequencies = 1 (-378.16)

M06/lanl2dz-6-31G(d) Geometry

|   |         |          |          |
|---|---------|----------|----------|
| C | 3.63504 | -1.61463 | -0.20688 |
| C | 4.82792 | -2.45093 | 0.29909  |

---

|    |          |          |          |
|----|----------|----------|----------|
| C  | 2.54752  | -2.41724 | 1.90207  |
| N  | 2.58586  | -1.57711 | 0.81357  |
| C  | 1.49038  | -0.78668 | 0.83983  |
| N  | 0.84300  | -1.19814 | 1.93966  |
| N  | 1.48453  | -2.20832 | 2.61840  |
| C  | 5.51265  | -2.90632 | -0.98547 |
| C  | 4.36766  | -3.01639 | -1.95670 |
| C  | 3.26054  | -2.30305 | -1.49438 |
| C  | 2.06880  | -2.27434 | -2.20502 |
| C  | 2.00531  | -2.97101 | -3.41121 |
| C  | 3.11165  | -3.67261 | -3.88563 |
| C  | 4.30117  | -3.70313 | -3.15987 |
| C  | -0.44068 | -0.75865 | 2.37822  |
| C  | -0.57478 | 0.51291  | 2.99874  |
| C  | -1.87719 | 0.92889  | 3.40501  |
| C  | -2.97345 | 0.05452  | 3.21059  |
| C  | -2.81436 | -1.17284 | 2.62224  |
| C  | -1.53411 | -1.57762 | 2.19097  |
| C  | 0.52044  | 1.38011  | 3.21983  |
| C  | 0.32830  | 2.61496  | 3.78771  |
| C  | -0.96080 | 3.03418  | 4.17947  |
| C  | -2.03745 | 2.20321  | 3.99811  |
| H  | 3.94703  | -0.57236 | -0.38411 |
| H  | 5.47948  | -1.87836 | 0.98314  |
| H  | 6.04907  | -3.84829 | -0.81825 |
| H  | 6.25060  | -2.15716 | -1.30975 |
| H  | 1.18739  | -1.74780 | -1.83378 |
| H  | 1.07990  | -2.96999 | -3.98374 |
| H  | 3.04265  | -4.21299 | -4.82792 |
| H  | 5.15754  | -4.26860 | -3.52500 |
| H  | -3.96151 | 0.37400  | 3.54338  |
| H  | -3.65709 | -1.84329 | 2.46550  |
| Cl | -1.37463 | -3.10718 | 1.39106  |
| H  | 1.52189  | 1.06554  | 2.93610  |
| H  | 1.18203  | 3.27280  | 3.93987  |
| H  | -1.09559 | 4.01388  | 4.63253  |

---

|    |          |          |          |
|----|----------|----------|----------|
| H  | -3.03536 | 2.51058  | 4.30993  |
| Au | 0.99546  | 0.85882  | -0.47653 |
| C  | 0.58412  | 2.45319  | -1.70032 |
| C  | 1.42703  | 3.56408  | -1.53144 |
| C  | -0.42794 | 2.46744  | -2.64611 |
| C  | 1.22508  | 4.69796  | -2.31452 |
| C  | -0.61951 | 3.61052  | -3.42785 |
| H  | -1.06150 | 1.59469  | -2.79895 |
| C  | 0.20124  | 4.71925  | -3.25756 |
| H  | 1.86898  | 5.56961  | -2.19870 |
| H  | -1.40950 | 3.62732  | -4.17701 |
| H  | 0.05009  | 5.60692  | -3.86888 |
| C  | 2.48735  | 2.12961  | 0.11053  |
| C  | 3.43069  | 1.82926  | 1.08106  |
| C  | 2.47034  | 3.38441  | -0.52488 |
| C  | 4.38190  | 2.78967  | 1.43704  |
| H  | 3.44254  | 0.85916  | 1.57884  |
| C  | 3.42809  | 4.32824  | -0.15667 |
| C  | 4.37653  | 4.03331  | 0.81781  |
| H  | 5.12375  | 2.55758  | 2.19907  |
| H  | 3.43464  | 5.30662  | -0.63627 |
| H  | 5.11692  | 4.78153  | 1.09384  |
| O  | -0.71679 | -0.36740 | -1.18358 |
| C  | -2.99202 | -0.93186 | -0.95630 |
| C  | -1.86789 | -0.12461 | -0.73307 |
| C  | -5.36187 | -1.37978 | -0.35514 |
| C  | -4.19180 | -0.61008 | -0.35221 |
| C  | -6.48796 | -1.06599 | 0.42131  |
| H  | -2.02094 | 0.78052  | -0.10900 |
| H  | -4.20980 | 0.31224  | 0.24262  |
| H  | -2.87475 | -1.84398 | -1.54198 |
| C  | -7.36831 | -2.16749 | 0.94043  |
| H  | -6.35717 | -0.22081 | 1.10813  |
| H  | -5.35754 | -2.31762 | -0.91574 |
| H  | -7.49477 | -2.95884 | 0.19077  |
| H  | -6.90699 | -2.62661 | 1.82616  |

---

|   |          |          |          |
|---|----------|----------|----------|
| H | -8.36149 | -1.80883 | 1.23709  |
| C | -7.78038 | 0.01164  | -0.76572 |
| C | -8.17019 | -0.93476 | -1.71398 |
| C | -7.23923 | -0.94620 | -2.78113 |
| C | -6.33415 | 0.06336  | -2.58436 |
| C | -6.79279 | 0.91494  | -1.45384 |
| H | -8.45381 | 0.37243  | 0.01135  |
| H | -9.00160 | -1.62658 | -1.60292 |
| H | -7.22540 | -1.66520 | -3.59471 |
| H | -5.48188 | 0.29471  | -3.21736 |
| H | -6.00320 | 1.34708  | -0.83085 |
| H | -7.36188 | 1.76371  | -1.87417 |
| C | 3.68124  | -3.35438 | 2.14873  |
| H | 4.36154  | -2.91311 | 2.90125  |
| H | 3.31361  | -4.30591 | 2.54604  |
| O | 4.35562  | -3.61699 | 0.94973  |

**Minor Endo product (optimized with ultrafine grid)**

M06/lanl2dz-6-31G(d) Energy = -2646.115071

M06/lanl2dz-6-31G(d) Free Energy = -2645.481698

M06/def2-TZVP Derived free energy = -2646.592361

Number of Imaginary Frequencies = 1 (-375.65)

M06/lanl2dz-6-31G(d) Geometry

|   |          |          |          |
|---|----------|----------|----------|
| C | -1.19165 | 3.02552  | -0.49749 |
| C | -1.13468 | 4.29350  | -1.37693 |
| C | -1.99334 | 1.96476  | -2.62385 |
| N | -1.55576 | 1.86922  | -1.32385 |
| C | -1.48818 | 0.56131  | -0.98777 |
| N | -1.89295 | -0.06259 | -2.10582 |
| N | -2.20526 | 0.79068  | -3.13707 |
| C | -1.38165 | 5.43120  | -0.39219 |
| C | -2.25944 | 4.79427  | 0.65055  |
| C | -2.17907 | 3.40276  | 0.57799  |
| C | -2.90361 | 2.59596  | 1.44423  |
| C | -3.72150 | 3.20584  | 2.39382  |

---

|    |          |          |          |
|----|----------|----------|----------|
| C  | -3.80130 | 4.59472  | 2.47167  |
| C  | -3.06976 | 5.39930  | 1.60033  |
| C  | -1.97999 | -1.47258 | -2.29279 |
| C  | -0.78034 | -2.23394 | -2.32645 |
| C  | -0.88595 | -3.65108 | -2.42921 |
| C  | -2.16674 | -4.24442 | -2.52819 |
| C  | -3.30553 | -3.48377 | -2.53871 |
| C  | -3.20846 | -2.08316 | -2.42044 |
| C  | 0.50770  | -1.64603 | -2.27965 |
| C  | 1.63291  | -2.43303 | -2.31190 |
| C  | 1.53037  | -3.83806 | -2.38567 |
| C  | 0.29477  | -4.43059 | -2.44675 |
| H  | -0.19693 | 2.80386  | -0.07970 |
| H  | -0.18137 | 4.37340  | -1.92911 |
| H  | -1.84195 | 6.28445  | -0.90536 |
| H  | -0.42954 | 5.77744  | 0.03754  |
| H  | -2.85279 | 1.50779  | 1.38699  |
| H  | -4.30398 | 2.59051  | 3.07654  |
| H  | -4.44768 | 5.05579  | 3.21609  |
| H  | -3.14377 | 6.48465  | 1.65629  |
| H  | -2.23699 | -5.32859 | -2.60731 |
| H  | -4.28972 | -3.93661 | -2.62759 |
| Cl | -4.67688 | -1.15823 | -2.40510 |
| H  | 0.60501  | -0.56179 | -2.24449 |
| H  | 2.61488  | -1.96086 | -2.29812 |
| H  | 2.43110  | -4.44778 | -2.40839 |
| H  | 0.20063  | -5.51358 | -2.51937 |
| Au | -0.60391 | -0.26053 | 0.81827  |
| C  | 0.24131  | -1.05402 | 2.51542  |
| C  | -0.55110 | -2.00462 | 3.18258  |
| C  | 1.48825  | -0.70714 | 3.01071  |
| C  | -0.05225 | -2.63319 | 4.32082  |
| C  | 1.97610  | -1.33740 | 4.15931  |
| H  | 2.08673  | 0.06610  | 2.52917  |
| C  | 1.21187  | -2.30380 | 4.80210  |
| H  | -0.65313 | -3.37476 | 4.84687  |

---

|   |          |          |          |
|---|----------|----------|----------|
| H | 2.95307  | -1.06313 | 4.55459  |
| H | 1.59403  | -2.79516 | 5.69489  |
| C | -2.17286 | -1.37528 | 1.50089  |
| C | -3.41986 | -1.37323 | 0.90456  |
| C | -1.88268 | -2.18553 | 2.61160  |
| C | -4.40824 | -2.23062 | 1.39615  |
| H | -3.64803 | -0.71824 | 0.06610  |
| C | -2.88284 | -3.03233 | 3.08645  |
| C | -4.13431 | -3.05967 | 2.47694  |
| H | -5.38965 | -2.23912 | 0.92421  |
| H | -2.68688 | -3.67167 | 3.94695  |
| H | -4.90392 | -3.72793 | 2.85837  |
| O | 1.21319  | 0.86220  | 0.11535  |
| C | 3.45282  | 0.84056  | -0.61874 |
| C | 2.30681  | 0.25995  | -0.05779 |
| C | 5.81955  | 0.53577  | -1.30951 |
| C | 4.61674  | 0.10154  | -0.74281 |
| C | 6.93062  | -0.29880 | -1.51057 |
| H | 2.38698  | -0.80171 | 0.25109  |
| H | 4.57949  | -0.93845 | -0.39296 |
| H | 3.40980  | 1.87974  | -0.94679 |
| C | 7.86237  | -0.03587 | -2.65926 |
| H | 6.76353  | -1.35905 | -1.28923 |
| H | 5.86578  | 1.56165  | -1.68359 |
| H | 8.02282  | 1.04044  | -2.80085 |
| H | 8.83860  | -0.51834 | -2.52884 |
| H | 7.42415  | -0.42766 | -3.58744 |
| C | 8.16826  | -0.09054 | 0.11888  |
| C | 8.59577  | 1.23258  | 0.00162  |
| C | 7.66839  | 2.08887  | 0.64441  |
| C | 6.72539  | 1.31988  | 1.27330  |
| C | 7.14545  | -0.10615 | 1.22247  |
| H | 8.82750  | -0.93669 | -0.07305 |
| H | 9.45381  | 1.56381  | -0.57833 |
| H | 7.68512  | 3.17390  | 0.60660  |
| H | 5.86507  | 1.68441  | 1.82810  |

---

|   |          |          |          |
|---|----------|----------|----------|
| H | 7.67971  | -0.33906 | 2.16123  |
| H | 6.33709  | -0.83914 | 1.13479  |
| O | -2.21576 | 4.29818  | -2.29092 |
| C | -2.11294 | 3.30276  | -3.27041 |
| H | -1.23690 | 3.47411  | -3.92378 |
| H | -3.01098 | 3.34801  | -3.89507 |

## 7.2 Cartesian coordinates of the catalyst-substrate structures

### Catalyst 4g

|   |          |          |          |
|---|----------|----------|----------|
| C | -2.91041 | -1.49163 | -0.00155 |
| C | -4.02977 | -2.47205 | -0.39125 |
| C | -1.51932 | -2.95709 | -1.45933 |
| N | -1.70050 | -1.79239 | -0.76280 |
| C | -0.59572 | -1.03237 | -0.90885 |
| N | 0.19096  | -1.77742 | -1.68789 |
| N | -0.36101 | -2.98075 | -2.03183 |
| C | -4.96207 | -2.43847 | 0.80839  |
| C | -4.02919 | -2.17284 | 1.95232  |
| C | -2.82173 | -1.66349 | 1.49016  |
| C | -1.79147 | -1.36676 | 2.35937  |
| C | -1.98943 | -1.57665 | 3.71643  |
| C | -3.19753 | -2.06991 | 4.18322  |
| C | -4.22563 | -2.37436 | 3.30374  |
| C | 1.50067  | -1.44832 | -2.13983 |
| C | 2.49311  | -2.41107 | -2.07764 |
| C | 3.77288  | -2.08268 | -2.48664 |
| C | 1.75928  | -0.17668 | -2.62540 |
| H | -3.20418 | -0.46636 | -0.25851 |
| H | -4.50994 | -2.19627 | -1.34087 |
| H | -5.51297 | -3.37639 | 0.89461  |
| H | -5.69583 | -1.63362 | 0.69438  |
| H | -0.83557 | -0.99458 | 2.00368  |
| H | -1.19246 | -1.35573 | 4.41590  |
| H | -3.33552 | -2.22937 | 5.24597  |



---

|    |          |          |          |
|----|----------|----------|----------|
| H  | -5.16252 | -2.77742 | 3.67195  |
| Au | -0.15536 | 0.88082  | -0.01570 |
| C  | 0.18239  | 2.70956  | 0.84811  |
| C  | -0.59352 | 3.75536  | 0.33291  |
| C  | 1.06595  | 2.93275  | 1.88319  |
| C  | -0.45516 | 5.02758  | 0.86616  |
| C  | 1.19422  | 4.21416  | 2.41018  |
| H  | 1.65023  | 2.12327  | 2.30668  |
| C  | 0.43861  | 5.25386  | 1.90029  |
| H  | -1.04775 | 5.84992  | 0.47995  |
| H  | 1.88524  | 4.39333  | 3.22556  |
| H  | 0.54096  | 6.24972  | 2.31436  |
| C  | -1.45975 | 2.00963  | -1.09333 |
| C  | -2.22029 | 1.51209  | -2.13050 |
| C  | -1.48981 | 3.36607  | -0.74641 |
| C  | -3.05553 | 2.37375  | -2.83459 |
| H  | -2.17288 | 0.46746  | -2.41709 |
| C  | -2.33574 | 4.20481  | -1.45880 |
| C  | -3.11386 | 3.71160  | -2.49270 |
| H  | -3.65383 | 1.99082  | -3.65269 |
| H  | -2.38097 | 5.25899  | -1.20822 |
| H  | -3.76554 | 4.38088  | -3.04111 |
| O  | 1.41396  | -0.19641 | 1.14401  |
| C  | 3.64101  | -0.83948 | 1.47063  |
| C  | 2.60330  | -0.13165 | 0.81209  |
| C  | 6.04527  | -1.37058 | 1.61394  |
| C  | 4.91803  | -0.71405 | 1.04405  |
| C  | 7.28846  | -1.19021 | 1.14612  |
| H  | 2.90478  | 0.50174  | -0.04318 |
| H  | 5.11144  | -0.05640 | 0.19612  |
| H  | 3.37787  | -1.47344 | 2.31169  |
| C  | 8.50271  | -1.82448 | 1.68737  |
| H  | 7.41983  | -0.51684 | 0.29979  |
| H  | 5.87574  | -2.03232 | 2.46041  |
| H  | 9.01610  | -2.40085 | 0.91227  |
| H  | 9.21738  | -1.06453 | 2.01692  |

---

|   |          |          |          |
|---|----------|----------|----------|
| H | 8.28150  | -2.48385 | 2.52650  |
| C | -2.61503 | -3.95725 | -1.53753 |
| H | -3.12147 | -3.85506 | -2.51085 |
| H | -2.21081 | -4.96864 | -1.48215 |
| O | -3.50897 | -3.78211 | -0.48023 |
| C | 4.05344  | -0.80637 | -2.94873 |
| C | 3.04695  | 0.14309  | -3.02053 |
| H | 4.55558  | -2.83019 | -2.44281 |
| H | 3.25544  | 1.13165  | -3.41095 |
| H | 5.05580  | -0.55699 | -3.27583 |
| H | 2.25338  | -3.40326 | -1.71618 |
| H | 0.95632  | 0.54627  | -2.71927 |

#### Catalyst 4h

|   |          |          |          |
|---|----------|----------|----------|
| C | -3.07101 | -1.76119 | -0.21806 |
| C | -3.98992 | -2.90418 | -0.68109 |
| C | -1.26689 | -3.24898 | -1.07429 |
| N | -1.69770 | -2.02216 | -0.64428 |
| C | -0.65345 | -1.16939 | -0.66139 |
| N | 0.35484  | -1.93028 | -1.10184 |
| N | -0.00633 | -3.22596 | -1.35415 |
| C | -5.17358 | -2.80861 | 0.26695  |
| C | -4.55120 | -2.29224 | 1.53044  |
| C | -3.31052 | -1.72401 | 1.26680  |
| C | -2.53019 | -1.21017 | 2.28267  |
| C | -3.01670 | -1.25636 | 3.58075  |
| C | -4.26166 | -1.80495 | 3.84541  |
| C | -5.03617 | -2.33069 | 2.82197  |
| C | 1.71284  | -1.54654 | -1.26544 |
| C | 2.70398  | -2.43859 | -0.89670 |
| C | 4.02318  | -2.04346 | -1.02686 |
| C | 2.01171  | -0.29192 | -1.76812 |
| H | -3.38141 | -0.81903 | -0.68664 |
| H | -4.25727 | -2.81643 | -1.74372 |
| H | -5.65826 | -3.78001 | 0.37720  |
| H | -5.91826 | -2.10995 | -0.12846 |

---

|    |          |          |          |
|----|----------|----------|----------|
| H  | -1.54555 | -0.79514 | 2.08954  |
| H  | -2.41727 | -0.86474 | 4.39344  |
| H  | -4.62704 | -1.83591 | 4.86485  |
| H  | -6.00036 | -2.77781 | 3.03692  |
| Au | -0.64614 | 0.88321  | 0.03318  |
| C  | -0.77383 | 2.79599  | 0.75418  |
| C  | -1.61774 | 3.64689  | 0.03100  |
| C  | -0.14539 | 3.23315  | 1.90082  |
| C  | -1.80503 | 4.94794  | 0.47215  |
| C  | -0.34099 | 4.54173  | 2.33206  |
| H  | 0.48365  | 2.57039  | 2.48509  |
| C  | -1.16448 | 5.39211  | 1.61759  |
| H  | -2.45648 | 5.62157  | -0.07399 |
| H  | 0.14892  | 4.88936  | 3.23400  |
| H  | -1.31638 | 6.40917  | 1.95821  |
| C  | -1.89122 | 1.69252  | -1.35851 |
| C  | -2.33189 | 1.00585  | -2.46942 |
| C  | -2.21996 | 3.03714  | -1.14612 |
| C  | -3.15492 | 1.65469  | -3.38493 |
| H  | -2.03994 | -0.02242 | -2.65126 |
| C  | -3.04778 | 3.66073  | -2.06916 |
| C  | -3.51536 | 2.97265  | -3.17635 |
| H  | -3.50392 | 1.12356  | -4.26240 |
| H  | -3.32173 | 4.70050  | -1.92786 |
| H  | -4.15745 | 3.47563  | -3.88913 |
| O  | 0.90099  | 0.15580  | 1.46758  |
| C  | 3.19785  | -0.04423 | 1.90116  |
| C  | 2.05606  | 0.58389  | 1.34516  |
| C  | 5.65896  | -0.08783 | 2.08943  |
| C  | 4.42522  | 0.46542  | 1.64686  |
| C  | 6.83994  | 0.45320  | 1.75603  |
| H  | 2.24181  | 1.50739  | 0.76597  |
| H  | 4.48612  | 1.36938  | 1.03878  |
| H  | 3.06106  | -0.94700 | 2.48875  |
| C  | 8.15776  | -0.06274 | 2.16268  |
| H  | 6.83025  | 1.34820  | 1.13411  |

---

|    |          |          |          |
|----|----------|----------|----------|
| H  | 5.62616  | -0.98284 | 2.70700  |
| H  | 8.76462  | -0.30236 | 1.28448  |
| H  | 8.71611  | 0.70078  | 2.71220  |
| H  | 8.07484  | -0.95341 | 2.78519  |
| C  | -2.23382 | -4.36574 | -1.23360 |
| H  | -2.49980 | -4.45381 | -2.29930 |
| H  | -1.77846 | -5.30903 | -0.92994 |
| O  | -3.36432 | -4.14848 | -0.44489 |
| C  | 4.36062  | -0.78705 | -1.50091 |
| C  | 3.34268  | 0.07775  | -1.85987 |
| Cl | 3.73651  | 1.66345  | -2.41800 |
| H  | 1.23090  | 0.38364  | -2.09795 |
| H  | 2.45160  | -3.41927 | -0.51681 |
| Cl | 5.27758  | -3.12828 | -0.55494 |
| H  | 5.39754  | -0.48843 | -1.58917 |

#### **Catalyst 4i**

|   |          |          |          |
|---|----------|----------|----------|
| C | -3.27325 | -1.95051 | -0.47186 |
| C | -4.05687 | -3.11862 | -1.09609 |
| C | -1.29991 | -3.16962 | -1.38306 |
| N | -1.86096 | -2.04290 | -0.84188 |
| C | -0.89914 | -1.10990 | -0.69682 |
| N | 0.19453  | -1.72655 | -1.16161 |
| N | -0.03445 | -3.00864 | -1.58160 |
| C | -5.28028 | -3.24036 | -0.20314 |
| C | -4.76568 | -2.80123 | 1.13521  |
| C | -3.58360 | -2.08477 | 0.99438  |
| C | -2.91203 | -1.59103 | 2.09533  |
| C | -3.44891 | -1.81605 | 3.35434  |
| C | -4.63346 | -2.52094 | 3.49809  |
| C | -5.29933 | -3.02092 | 2.38918  |
| C | 1.52126  | -1.22417 | -1.18593 |
| C | 2.56267  | -2.07216 | -0.85469 |
| C | 3.85304  | -1.57650 | -0.82747 |
| C | 1.75839  | 0.09905  | -1.50773 |
| H | -3.64562 | -0.99640 | -0.86479 |

---

|    |          |          |          |
|----|----------|----------|----------|
| H  | -4.29060 | -2.94118 | -2.15548 |
| H  | -5.66741 | -4.26035 | -0.21722 |
| H  | -6.07688 | -2.58017 | -0.56167 |
| H  | -1.97416 | -1.05147 | 1.99815  |
| H  | -2.93535 | -1.44204 | 4.23161  |
| H  | -5.03791 | -2.69130 | 4.48863  |
| H  | -6.21694 | -3.58625 | 2.50761  |
| Au | -1.09863 | 0.85535  | 0.19601  |
| C  | -1.38670 | 2.69108  | 1.05729  |
| C  | -2.13260 | 3.59389  | 0.29148  |
| C  | -0.93822 | 3.03258  | 2.31546  |
| C  | -2.40064 | 4.85358  | 0.80457  |
| C  | -1.21490 | 4.30014  | 2.81859  |
| H  | -0.39113 | 2.32416  | 2.92812  |
| C  | -1.93869 | 5.20399  | 2.06291  |
| H  | -2.97877 | 5.56668  | 0.22678  |
| H  | -0.86750 | 4.57324  | 3.80808  |
| H  | -2.15351 | 6.18897  | 2.45927  |
| C  | -2.20226 | 1.74936  | -1.26388 |
| C  | -2.51502 | 1.13746  | -2.45865 |
| C  | -2.56545 | 3.07531  | -0.99742 |
| C  | -3.22954 | 1.84969  | -3.41708 |
| H  | -2.20594 | 0.12075  | -2.67322 |
| C  | -3.27792 | 3.76440  | -1.96840 |
| C  | -3.61004 | 3.15449  | -3.16657 |
| H  | -3.47814 | 1.37800  | -4.36026 |
| H  | -3.57183 | 4.79296  | -1.79009 |
| H  | -4.16465 | 3.70759  | -3.91478 |
| O  | 0.33188  | 0.04870  | 1.72091  |
| C  | 2.62333  | -0.11664 | 2.21814  |
| C  | 1.46469  | 0.54946  | 1.74725  |
| C  | 5.08967  | -0.11955 | 2.34472  |
| C  | 3.83085  | 0.47404  | 2.05183  |
| C  | 6.24794  | 0.48441  | 2.04024  |
| H  | 1.62087  | 1.57227  | 1.35841  |
| H  | 3.85297  | 1.47532  | 1.61677  |

---

|   |          |          |          |
|---|----------|----------|----------|
| H | 2.52689  | -1.12050 | 2.62184  |
| C | 7.58475  | -0.09707 | 2.24432  |
| H | 6.20202  | 1.47591  | 1.58877  |
| H | 5.09781  | -1.11012 | 2.79353  |
| H | 8.10531  | -0.19232 | 1.28601  |
| H | 8.20602  | 0.55909  | 2.86042  |
| H | 7.53562  | -1.08107 | 2.71091  |
| C | -2.15033 | -4.33967 | -1.71948 |
| H | -2.36964 | -4.32169 | -2.79924 |
| H | -1.61886 | -5.26814 | -1.50738 |
| O | -3.32141 | -4.31757 | -0.96261 |
| C | 4.10722  | -0.24860 | -1.12082 |
| C | 3.05398  | 0.58469  | -1.44904 |
| C | 3.27750  | 2.04425  | -1.74039 |
| H | 0.94230  | 0.74938  | -1.80696 |
| H | 2.35965  | -3.10841 | -0.61156 |
| C | 4.95682  | -2.51426 | -0.41758 |
| H | 5.11782  | 0.13529  | -1.08779 |
| F | 4.51768  | 2.41979  | -1.45331 |
| F | 3.04071  | 2.32839  | -3.01260 |
| F | 2.45056  | 2.79543  | -1.00519 |
| F | 6.13104  | -1.90092 | -0.33348 |
| F | 4.69294  | -3.04610 | 0.77972  |
| F | 5.07679  | -3.51866 | -1.27435 |

**Catalyst 4j**

|   |          |          |          |
|---|----------|----------|----------|
| C | -3.60713 | -1.74937 | -0.56642 |
| C | -4.47339 | -2.76967 | -1.32483 |
| C | -1.73013 | -2.95490 | -1.67559 |
| N | -2.21230 | -1.88413 | -0.97344 |
| C | -1.19266 | -1.03001 | -0.74755 |
| N | -0.15162 | -1.62834 | -1.32901 |
| N | -0.46350 | -2.82960 | -1.90248 |
| C | -5.69691 | -2.92269 | -0.43644 |
| C | -5.14212 | -2.70491 | 0.93990  |

---

|    |          |          |          |
|----|----------|----------|----------|
| C  | -3.91365 | -2.05830 | 0.87360  |
| C  | -3.19427 | -1.77060 | 2.01562  |
| C  | -3.72843 | -2.13496 | 3.24310  |
| C  | -4.95909 | -2.76858 | 3.31499  |
| C  | -5.67429 | -3.05982 | 2.16303  |
| C  | 1.18816  | -1.14208 | -1.37369 |
| C  | 2.22541  | -1.99551 | -1.08771 |
| C  | 3.54546  | -1.54885 | -1.08596 |
| C  | 1.41324  | 0.19426  | -1.63631 |
| H  | -3.91858 | -0.72883 | -0.82189 |
| H  | -4.70186 | -2.44001 | -2.34851 |
| H  | -6.15859 | -3.90106 | -0.57916 |
| H  | -6.44402 | -2.16368 | -0.69085 |
| H  | -2.22277 | -1.28830 | 1.96992  |
| H  | -3.17762 | -1.92491 | 4.15188  |
| H  | -5.36112 | -3.04929 | 4.28116  |
| H  | -6.62851 | -3.57139 | 2.22312  |
| Au | -1.18871 | 0.84193  | 0.32034  |
| C  | -1.22382 | 2.64621  | 1.29578  |
| C  | -1.88328 | 3.67337  | 0.60987  |
| C  | -0.66423 | 2.87583  | 2.53608  |
| C  | -1.96178 | 4.93228  | 1.18613  |
| C  | -0.75208 | 4.14297  | 3.10422  |
| H  | -0.17327 | 2.08002  | 3.08537  |
| C  | -1.39594 | 5.16368  | 2.42958  |
| H  | -2.46902 | 5.74010  | 0.66968  |
| H  | -0.31900 | 4.32533  | 4.08086  |
| H  | -1.46359 | 6.14823  | 2.87655  |
| C  | -2.22305 | 1.94389  | -1.04221 |
| C  | -2.63397 | 1.45446  | -2.26411 |
| C  | -2.42486 | 3.28363  | -0.68459 |
| C  | -3.28968 | 2.30227  | -3.15119 |
| H  | -2.44641 | 0.42702  | -2.55512 |
| C  | -3.08488 | 4.10928  | -1.58447 |
| C  | -3.51790 | 3.62075  | -2.80591 |
| H  | -3.61560 | 1.92358  | -4.11264 |

---

|   |          |          |          |
|---|----------|----------|----------|
| H | -3.25799 | 5.14934  | -1.33035 |
| H | -4.03028 | 4.27927  | -3.49676 |
| O | 0.09484  | -0.16282 | 1.83556  |
| C | 2.23660  | -0.53879 | 2.71934  |
| C | 1.31213  | 0.05710  | 1.82408  |
| C | 4.58506  | -0.75425 | 3.44592  |
| C | 3.55046  | -0.23169 | 2.61898  |
| C | 5.86839  | -0.40255 | 3.28369  |
| H | 1.74019  | 0.76068  | 1.08563  |
| H | 3.85603  | 0.46415  | 1.83485  |
| H | 1.86411  | -1.22920 | 3.46991  |
| C | 7.00010  | -0.91315 | 4.07539  |
| H | 6.10094  | 0.31571  | 2.49751  |
| H | 4.30985  | -1.46499 | 4.22220  |
| H | 7.72497  | -1.41045 | 3.42334  |
| H | 7.54121  | -0.09158 | 4.55339  |
| H | 6.67904  | -1.61705 | 4.84312  |
| C | -2.65674 | -4.02255 | -2.13179 |
| H | -2.88651 | -3.86352 | -3.19764 |
| H | -2.18526 | -5.00175 | -2.04011 |
| O | -3.81920 | -4.02099 | -1.35861 |
| C | 3.76176  | -0.20487 | -1.44532 |
| C | 2.69997  | 0.70782  | -1.63706 |
| C | 2.91253  | 2.22254  | -1.76595 |
| H | 0.56915  | 0.83288  | -1.85757 |
| H | 1.98907  | -3.02521 | -0.85574 |
| C | 4.62055  | -2.56760 | -0.66450 |
| O | 5.03003  | 0.27870  | -1.59313 |
| C | 1.58051  | 2.96776  | -1.84280 |
| C | 3.63125  | 2.73524  | -0.51386 |
| C | 3.71106  | 2.61039  | -3.01080 |
| C | 5.93841  | -1.95096 | -0.19517 |
| C | 4.10787  | -3.38683 | 0.52957  |
| C | 4.88908  | -3.53777 | -1.81613 |
| H | 1.77864  | 4.04087  | -1.87029 |
| H | 1.01123  | 2.71992  | -2.74366 |



---

|   |         |          |          |
|---|---------|----------|----------|
| H | 0.94731 | 2.77983  | -0.96954 |
| H | 3.80529 | 3.81058  | -0.60439 |
| H | 3.01294 | 2.58433  | 0.37805  |
| H | 4.59550 | 2.24890  | -0.36561 |
| H | 3.67212 | 3.69476  | -3.13958 |
| H | 4.75990 | 2.33198  | -2.93778 |
| H | 3.28620 | 2.15635  | -3.91026 |
| H | 6.54692 | -2.73958 | 0.25458  |
| H | 6.52806 | -1.50704 | -0.99258 |
| H | 5.63279 | -4.27902 | -1.51214 |
| H | 3.98125 | -4.07253 | -2.10531 |
| H | 5.26892 | -3.02925 | -2.70405 |
| H | 4.89928 | -4.05962 | 0.86641  |
| H | 3.83661 | -2.74053 | 1.36972  |
| H | 3.24810 | -4.01189 | 0.28851  |
| H | 5.76908 | -1.18457 | 0.56510  |
| C | 5.63569 | -0.02463 | -2.83600 |
| H | 6.56080 | 0.54887  | -2.88961 |
| H | 5.87300 | -1.08816 | -2.92465 |
| H | 4.98982 | 0.25643  | -3.67328 |

**Catalyst 4k**

|   |          |          |          |
|---|----------|----------|----------|
| C | -2.94630 | -1.70748 | 0.01013  |
| C | -3.99592 | -2.67692 | -0.56276 |
| C | -1.51213 | -2.64598 | -1.80140 |
| N | -1.75221 | -1.71000 | -0.82802 |
| C | -0.70854 | -0.85911 | -0.79497 |
| N | 0.11018  | -1.33138 | -1.73535 |
| N | -0.37549 | -2.43954 | -2.37633 |
| C | -4.84957 | -3.03133 | 0.64404  |
| C | -3.88108 | -2.93899 | 1.78562  |
| C | -2.76314 | -2.20154 | 1.41792  |
| C | -1.72507 | -1.98413 | 2.30147  |
| C | -1.82289 | -2.51579 | 3.57878  |
| C | -2.93986 | -3.24614 | 3.95353  |
| C | -3.97656 | -3.46492 | 3.05873  |

---

|    |          |          |          |
|----|----------|----------|----------|
| C  | 1.38069  | -0.80198 | -2.08400 |
| C  | 2.52594  | -1.55819 | -1.82463 |
| C  | 3.77165  | -1.04075 | -2.16696 |
| C  | 1.46637  | 0.46051  | -2.67607 |
| H  | -3.34255 | -0.68453 | 0.00681  |
| H  | -4.55973 | -2.22805 | -1.39336 |
| H  | -5.29909 | -4.01797 | 0.52069  |
| H  | -5.66460 | -2.30867 | 0.75567  |
| H  | -0.84005 | -1.42563 | 2.01191  |
| H  | -1.01944 | -2.36091 | 4.28865  |
| H  | -2.99966 | -3.65740 | 4.95416  |
| H  | -4.84176 | -4.04904 | 3.35210  |
| Au | -0.39320 | 0.93554  | 0.34030  |
| C  | -0.09012 | 2.70198  | 1.33951  |
| C  | -0.90765 | 3.76044  | 0.92480  |
| C  | 0.83589  | 2.88543  | 2.34599  |
| C  | -0.76842 | 5.00278  | 1.52505  |
| C  | 0.96449  | 4.13565  | 2.94248  |
| H  | 1.45370  | 2.06550  | 2.69552  |
| C  | 0.16795  | 5.18771  | 2.52927  |
| H  | -1.39444 | 5.83333  | 1.21674  |
| H  | 1.68728  | 4.28078  | 3.73694  |
| H  | 0.27051  | 6.15966  | 2.99676  |
| C  | -1.82686 | 2.07813  | -0.54700 |
| C  | -2.66451 | 1.62099  | -1.54259 |
| C  | -1.85679 | 3.41269  | -0.12322 |
| C  | -3.56907 | 2.50010  | -2.12870 |
| H  | -2.61207 | 0.59931  | -1.90070 |
| C  | -2.76341 | 4.27408  | -0.72734 |
| C  | -3.61443 | 3.82065  | -1.72077 |
| H  | -4.23018 | 2.14565  | -2.91071 |
| H  | -2.80566 | 5.31242  | -0.41734 |
| H  | -4.31712 | 4.50486  | -2.18076 |
| O  | 1.26007  | -0.15139 | 1.35748  |
| C  | 3.52043  | -0.68751 | 1.62901  |
| C  | 2.43932  | 0.01725  | 1.03396  |

---

|   |          |          |          |
|---|----------|----------|----------|
| C | 5.94468  | -1.13312 | 1.68983  |
| C | 4.78303  | -0.46684 | 1.20258  |
| C | 7.17019  | -0.87732 | 1.21133  |
| H | 2.70068  | 0.74312  | 0.24171  |
| H | 4.93379  | 0.26970  | 0.41247  |
| H | 3.29519  | -1.40857 | 2.40892  |
| C | 8.41431  | -1.52139 | 1.66753  |
| H | 7.26218  | -0.12831 | 0.42532  |
| H | 5.81473  | -1.87057 | 2.47934  |
| H | 8.92512  | -2.01193 | 0.83389  |
| H | 9.11557  | -0.77311 | 2.04858  |
| H | 8.23139  | -2.25834 | 2.44951  |
| C | -2.53314 | -3.68232 | -2.10021 |
| H | -3.10772 | -3.37857 | -2.98993 |
| H | -2.05193 | -4.63394 | -2.32781 |
| O | -3.37164 | -3.86620 | -0.99780 |
| C | 3.84534  | 0.21742  | -2.73707 |
| C | 2.71958  | 0.98078  | -2.98510 |
| H | 4.67240  | -1.61362 | -1.99326 |
| H | 2.81222  | 1.95430  | -3.44535 |
| H | 4.81663  | 0.61610  | -3.00663 |
| O | 2.32701  | -2.73854 | -1.22819 |
| O | 0.30688  | 1.08475  | -2.90367 |
| C | 0.33105  | 2.44097  | -3.30304 |
| C | 3.43627  | -3.58411 | -1.01934 |
| H | 3.04743  | -4.49501 | -0.57046 |
| H | 3.92958  | -3.83102 | -1.96366 |
| H | 4.16369  | -3.13020 | -0.33760 |
| H | -0.70562 | 2.77407  | -3.31281 |
| H | 0.89555  | 3.05093  | -2.58959 |
| H | 0.76043  | 2.55524  | -4.30214 |

**Catalyst 4I**

|   |         |          |          |
|---|---------|----------|----------|
| C | 3.36023 | -0.80478 | -0.42086 |
| C | 4.72471 | -1.34341 | 0.04481  |
| C | 2.51269 | -1.98800 | 1.60238  |

---

|    |          |          |          |
|----|----------|----------|----------|
| N  | 2.33536  | -1.10403 | 0.57263  |
| C  | 1.06658  | -0.64806 | 0.61921  |
| N  | 0.54121  | -1.29393 | 1.65659  |
| N  | 1.42362  | -2.12737 | 2.28744  |
| C  | 5.49095  | -1.53567 | -1.25444 |
| C  | 4.40976  | -1.87000 | -2.23922 |
| C  | 3.17020  | -1.47334 | -1.75390 |
| C  | 2.01341  | -1.68842 | -2.47577 |
| C  | 2.11320  | -2.31025 | -3.71194 |
| C  | 3.34856  | -2.70134 | -4.20463 |
| C  | 4.50603  | -2.48471 | -3.47184 |
| C  | -0.84501 | -1.28792 | 2.02313  |
| C  | -1.63712 | -2.33165 | 1.53544  |
| C  | -2.98465 | -2.30467 | 1.86734  |
| C  | -1.33287 | -0.25280 | 2.81751  |
| H  | 3.40343  | 0.28605  | -0.52778 |
| H  | 5.21346  | -0.66397 | 0.75824  |
| H  | 6.24790  | -2.31370 | -1.14317 |
| H  | 6.00672  | -0.60954 | -1.52876 |
| H  | 1.04125  | -1.39140 | -2.09303 |
| H  | 1.21904  | -2.49423 | -4.29500 |
| H  | 3.40910  | -3.18932 | -5.17011 |
| H  | 5.46750  | -2.80698 | -3.85582 |
| Au | 0.13980  | 0.98879  | -0.41953 |
| C  | -0.68871 | 2.63692  | -1.32517 |
| C  | -0.16173 | 3.86310  | -0.90278 |
| C  | -1.67594 | 2.59492  | -2.28946 |
| C  | -0.66241 | 5.03993  | -1.43912 |
| C  | -2.16511 | 3.78219  | -2.82463 |
| H  | -2.06503 | 1.65107  | -2.65521 |
| C  | -1.66485 | 4.99715  | -2.39406 |
| H  | -0.26504 | 5.99796  | -1.12169 |
| H  | -2.93617 | 3.75056  | -3.58551 |
| H  | -2.04937 | 5.91953  | -2.81239 |
| C  | 1.28736  | 2.45123  | 0.42288  |
| C  | 2.29185  | 2.21895  | 1.33976  |

---

|   |          |          |          |
|---|----------|----------|----------|
| C | 0.91461  | 3.75567  | 0.07162  |
| C | 2.95074  | 3.29669  | 1.92243  |
| H | 2.57749  | 1.21433  | 1.63023  |
| C | 1.58466  | 4.81588  | 0.66697  |
| C | 2.59530  | 4.58898  | 1.58507  |
| H | 3.73972  | 3.11570  | 2.64269  |
| H | 1.31110  | 5.83325  | 0.40961  |
| H | 3.10736  | 5.42781  | 2.04070  |
| O | -1.36679 | -0.38517 | -1.30231 |
| C | -3.62075 | -0.96197 | -1.56739 |
| C | -2.53900 | -0.32007 | -0.91013 |
| C | -6.04098 | -1.43367 | -1.63762 |
| C | -4.87355 | -0.84790 | -1.07184 |
| C | -7.25511 | -1.27441 | -1.09189 |
| H | -2.79521 | 0.27646  | -0.01511 |
| H | -5.00943 | -0.26342 | -0.16132 |
| H | -3.41189 | -1.53077 | -2.46859 |
| C | -8.50732 | -1.84428 | -1.61828 |
| H | -7.32956 | -0.67260 | -0.18683 |
| H | -5.92740 | -2.02548 | -2.54322 |
| H | -8.98670 | -2.48087 | -0.86891 |
| H | -9.22685 | -1.05067 | -1.84020 |
| H | -8.34270 | -2.43016 | -2.52248 |
| C | 3.84612  | -2.60353 | 1.82372  |
| H | 4.38021  | -2.04012 | 2.60583  |
| H | 3.73706  | -3.63046 | 2.17364  |
| O | 4.56967  | -2.61939 | 0.62937  |
| C | -3.50570 | -1.28570 | 2.64510  |
| C | -2.69205 | -0.27228 | 3.11264  |
| H | -3.63499 | -3.09928 | 1.51863  |
| H | -3.10986 | 0.51050  | 3.73555  |
| H | -4.55919 | -1.29013 | 2.90148  |
| C | -1.05112 | -3.48180 | 0.74808  |
| C | -0.43680 | 0.80850  | 3.40497  |
| C | -0.98468 | 2.21590  | 3.22294  |
| C | -0.17479 | 0.50165  | 4.87470  |

---

|   |          |          |          |
|---|----------|----------|----------|
| H | 0.52927  | 0.76865  | 2.89294  |
| C | -0.81962 | -4.66578 | 1.68197  |
| C | -1.89177 | -3.89776 | -0.44698 |
| H | -0.07800 | -3.16811 | 0.35142  |
| H | -0.34735 | -5.49073 | 1.14443  |
| H | -0.18225 | -4.39108 | 2.52443  |
| H | -1.77174 | -5.02731 | 2.08071  |
| H | 0.50446  | 1.24137  | 5.30394  |
| H | -1.10445 | 0.52726  | 5.44949  |
| H | 0.27039  | -0.48858 | 4.99705  |
| H | -1.40387 | -4.72373 | -0.96812 |
| H | -2.88412 | -4.24753 | -0.15141 |
| H | -2.01190 | -3.07922 | -1.15933 |
| H | -0.22524 | 2.94924  | 3.50477  |
| H | -1.26604 | 2.41340  | 2.18396  |
| H | -1.86132 | 2.39456  | 3.85033  |

#### **Catalyst 4m**

|   |          |          |          |
|---|----------|----------|----------|
| C | -2.97292 | -1.58688 | 0.07080  |
| C | -4.09496 | -2.50107 | -0.45211 |
| C | -1.66103 | -2.60423 | -1.78765 |
| N | -1.81814 | -1.65023 | -0.81901 |
| C | -0.72589 | -0.85807 | -0.82290 |
| N | 0.03870  | -1.38137 | -1.77933 |
| N | -0.52706 | -2.46817 | -2.39307 |
| C | -4.90904 | -2.81076 | 0.79376  |
| C | -3.88444 | -2.77108 | 1.88874  |
| C | -2.74695 | -2.09423 | 1.46770  |
| C | -1.65603 | -1.93759 | 2.29928  |
| C | -1.72092 | -2.46694 | 3.57991  |
| C | -2.85776 | -3.13415 | 4.00874  |
| C | -3.94717 | -3.29334 | 3.16529  |
| C | 1.37862  | -0.99651 | -2.12356 |
| C | 2.41452  | -1.79735 | -1.62383 |
| C | 3.70927  | -1.44170 | -1.96450 |
| C | 1.59249  | 0.11395  | -2.93323 |

---

|    |          |          |          |
|----|----------|----------|----------|
| H  | -3.31740 | -0.54548 | 0.08487  |
| H  | -4.67150 | -2.02339 | -1.25766 |
| H  | -5.41502 | -3.77229 | 0.69346  |
| H  | -5.67902 | -2.04632 | 0.94139  |
| H  | -0.75732 | -1.42445 | 1.96938  |
| H  | -0.87633 | -2.35918 | 4.24953  |
| H  | -2.89183 | -3.54345 | 5.01133  |
| H  | -4.82783 | -3.82972 | 3.50065  |
| Au | -0.37300 | 0.94409  | 0.28957  |
| C  | -0.07901 | 2.71460  | 1.28512  |
| C  | -0.91251 | 3.76305  | 0.87798  |
| C  | 0.85448  | 2.90657  | 2.28284  |
| C  | -0.77900 | 5.00707  | 1.47633  |
| C  | 0.97639  | 4.15822  | 2.87752  |
| H  | 1.48338  | 2.09241  | 2.62619  |
| C  | 0.16545  | 5.20185  | 2.47090  |
| H  | -1.41528 | 5.83159  | 1.17314  |
| H  | 1.70544  | 4.31104  | 3.66473  |
| H  | 0.26355  | 6.17538  | 2.93597  |
| C  | -1.82753 | 2.07195  | -0.58759 |
| C  | -2.66314 | 1.61333  | -1.58457 |
| C  | -1.86622 | 3.40640  | -0.16232 |
| C  | -3.57221 | 2.48828  | -2.17042 |
| H  | -2.61844 | 0.58888  | -1.93737 |
| C  | -2.77984 | 4.26195  | -0.76266 |
| C  | -3.62742 | 3.80621  | -1.75806 |
| H  | -4.23045 | 2.13145  | -2.95369 |
| H  | -2.82804 | 5.29946  | -0.45093 |
| H  | -4.33389 | 4.48732  | -2.21666 |
| O  | 1.31057  | -0.10429 | 1.27147  |
| C  | 3.58995  | -0.53933 | 1.53683  |
| C  | 2.48432  | 0.14846  | 0.97501  |
| C  | 6.02295  | -0.91971 | 1.57509  |
| C  | 4.84658  | -0.25301 | 1.13023  |
| C  | 7.24064  | -0.61005 | 1.10705  |
| H  | 2.71139  | 0.94024  | 0.23765  |

---

|   |          |          |          |
|---|----------|----------|----------|
| H | 4.97756  | 0.53266  | 0.38542  |
| H | 3.38856  | -1.31471 | 2.27054  |
| C | 8.49932  | -1.25863 | 1.51221  |
| H | 7.31247  | 0.18755  | 0.36830  |
| H | 5.91107  | -1.70881 | 2.31614  |
| H | 9.00567  | -1.69319 | 0.64529  |
| H | 9.19465  | -0.52186 | 1.92516  |
| H | 8.33788  | -2.04153 | 2.25315  |
| C | -2.75022 | -3.58078 | -2.04696 |
| H | -3.34111 | -3.24051 | -2.91256 |
| H | -2.33354 | -4.55705 | -2.29620 |
| O | -3.55218 | -3.72083 | -0.91202 |
| C | 3.95666  | -0.33891 | -2.76702 |
| C | 2.91475  | 0.42845  | -3.23961 |
| H | 4.54012  | -2.03297 | -1.59850 |
| H | 3.11574  | 1.27919  | -3.88147 |
| H | 4.97642  | -0.08706 | -3.03527 |
| C | 2.10667  | -2.98913 | -0.75990 |
| C | 0.49206  | 0.96583  | -3.49518 |
| H | -0.48546 | 0.55147  | -3.23940 |
| C | 0.57518  | 2.41634  | -3.04095 |
| H | 0.55504  | 0.92646  | -4.58754 |
| C | 3.30193  | -3.73757 | -0.21062 |
| H | 1.46403  | -2.66525 | 0.07087  |
| H | 1.48590  | -3.67966 | -1.34040 |
| H | 2.96976  | -4.57354 | 0.40514  |
| H | 3.92360  | -4.14934 | -1.00806 |
| H | 3.93562  | -3.10048 | 0.41330  |
| H | -0.28138 | 2.98817  | -3.40317 |
| H | 0.58276  | 2.49364  | -1.94866 |
| H | 1.48013  | 2.90045  | -3.41203 |

**Catalyst 4n**

|   |          |          |          |
|---|----------|----------|----------|
| C | -3.06903 | -1.23505 | 0.24975  |
| C | -4.32668 | -2.04401 | -0.11074 |
| C | -2.00172 | -2.62415 | -1.51912 |



---

|    |          |          |          |
|----|----------|----------|----------|
| N  | -1.98972 | -1.54144 | -0.68161 |
| C  | -0.81175 | -0.90085 | -0.83284 |
| N  | -0.17190 | -1.63483 | -1.73963 |
| N  | -0.89384 | -2.71248 | -2.18003 |
| C  | -5.09586 | -2.09861 | 1.19956  |
| C  | -4.00524 | -2.09533 | 2.22991  |
| C  | -2.81845 | -1.62807 | 1.67917  |
| C  | -1.65905 | -1.55891 | 2.42468  |
| C  | -1.70333 | -1.95810 | 3.75272  |
| C  | -2.88767 | -2.41291 | 4.31108  |
| C  | -4.04673 | -2.48723 | 3.55297  |
| C  | 1.18167  | -1.45562 | -2.17371 |
| C  | 2.15466  | -2.25369 | -1.57370 |
| C  | 3.46688  | -2.07583 | -1.98828 |
| C  | 1.46127  | -0.51603 | -3.16010 |
| H  | -3.27849 | -0.16149 | 0.16703  |
| H  | -4.88528 | -1.58940 | -0.94161 |
| H  | -5.73668 | -2.98109 | 1.23378  |
| H  | -5.73947 | -1.21809 | 1.29571  |
| H  | -0.72240 | -1.21760 | 1.99279  |
| H  | -0.80502 | -1.91777 | 4.35665  |
| H  | -2.90507 | -2.72487 | 5.34840  |
| H  | -4.96571 | -2.86194 | 3.98993  |
| Au | -0.14119 | 0.93580  | 0.06162  |
| C  | 0.41334  | 2.72188  | 0.90944  |
| C  | -0.36345 | 3.82066  | 0.52414  |
| C  | 1.43355  | 2.87468  | 1.82573  |
| C  | -0.09062 | 5.06922  | 1.06199  |
| C  | 1.69961  | 4.13287  | 2.35665  |
| H  | 2.02302  | 2.02784  | 2.15943  |
| C  | 0.94104  | 5.22314  | 1.97355  |
| H  | -0.68542 | 5.92955  | 0.77439  |
| H  | 2.49911  | 4.25346  | 3.07832  |
| H  | 1.14862  | 6.20069  | 2.39173  |
| C  | -1.50359 | 2.16698  | -0.82032 |
| C  | -2.43160 | 1.74715  | -1.75118 |

---

|   |          |          |          |
|---|----------|----------|----------|
| C | -1.41442 | 3.51092  | -0.43472 |
| C | -3.31182 | 2.67279  | -2.30145 |
| H | -2.48301 | 0.71414  | -2.07573 |
| C | -2.30559 | 4.41578  | -0.99482 |
| C | -3.24945 | 3.99914  | -1.91794 |
| H | -4.04188 | 2.34800  | -3.03322 |
| H | -2.25866 | 5.46091  | -0.70959 |
| H | -3.93702 | 4.71832  | -2.34629 |
| O | 1.45060  | -0.23710 | 1.06813  |
| C | 3.68777  | -0.83629 | 1.38273  |
| C | 2.63714  | -0.13806 | 0.73352  |
| C | 6.10390  | -1.30165 | 1.54800  |
| C | 4.96544  | -0.66917 | 0.97392  |
| C | 7.34713  | -1.07960 | 1.09777  |
| H | 2.92311  | 0.52834  | -0.10067 |
| H | 5.14784  | 0.00136  | 0.13333  |
| H | 3.43105  | -1.49097 | 2.21032  |
| C | 8.57242  | -1.68613 | 1.64552  |
| H | 7.46918  | -0.39107 | 0.26237  |
| H | 5.94344  | -1.97855 | 2.38429  |
| H | 9.11151  | -2.23619 | 0.86875  |
| H | 9.26065  | -0.91030 | 1.99393  |
| H | 8.36063  | -2.36330 | 2.47282  |
| C | -3.21599 | -3.47549 | -1.61048 |
| H | -3.80251 | -3.17051 | -2.49220 |
| H | -2.93734 | -4.52085 | -1.74666 |
| O | -3.97134 | -3.37051 | -0.44049 |
| C | 3.78297  | -1.13907 | -2.95663 |
| C | 2.79202  | -0.36783 | -3.53432 |
| H | 4.24514  | -2.68587 | -1.54150 |
| H | 3.04160  | 0.35043  | -4.30722 |
| H | 4.81167  | -1.01931 | -3.27650 |
| C | 1.79656  | -3.26063 | -0.53150 |
| C | 0.38669  | 0.29421  | -3.80650 |
| H | 0.74391  | 0.72891  | -4.73944 |
| H | -0.49394 | -0.31197 | -4.03034 |

---

|   |         |          |          |
|---|---------|----------|----------|
| H | 0.05857 | 1.11922  | -3.16616 |
| H | 2.69290 | -3.71192 | -0.10624 |
| H | 1.22038 | -2.81041 | 0.28434  |
| H | 1.18162 | -4.05981 | -0.95161 |

**Catalyst 4o**

|    |          |          |          |
|----|----------|----------|----------|
| C  | -3.01403 | -1.43058 | 0.08628  |
| C  | -4.14567 | -2.39186 | -0.31616 |
| C  | -1.64787 | -2.87511 | -1.42180 |
| N  | -1.80975 | -1.72847 | -0.68593 |
| C  | -0.69517 | -0.98402 | -0.80565 |
| N  | 0.08250  | -1.72235 | -1.60007 |
| N  | -0.49160 | -2.90239 | -1.99581 |
| C  | -5.06505 | -2.38219 | 0.89423  |
| C  | -4.12027 | -2.14621 | 2.03490  |
| C  | -2.91487 | -1.63248 | 1.57296  |
| C  | -1.87636 | -1.35485 | 2.43869  |
| C  | -2.06352 | -1.59027 | 3.79293  |
| C  | -3.26922 | -2.08936 | 4.26010  |
| C  | -4.30584 | -2.37339 | 3.38389  |
| C  | 1.38627  | -1.38819 | -2.03453 |
| C  | 2.48904  | -2.09729 | -1.57611 |
| C  | 3.76704  | -1.78190 | -1.98467 |
| C  | 1.59943  | -0.34187 | -2.92332 |
| H  | -3.29748 | -0.39733 | -0.14842 |
| H  | -4.63415 | -2.08691 | -1.25253 |
| H  | -5.61918 | -3.31960 | 0.96405  |
| H  | -5.79652 | -1.57205 | 0.80660  |
| H  | -0.92247 | -0.97831 | 2.08141  |
| H  | -1.26018 | -1.38552 | 4.49002  |
| H  | -3.39857 | -2.26947 | 5.32064  |
| H  | -5.24102 | -2.78007 | 3.75242  |
| Au | -0.20831 | 0.92163  | 0.06899  |
| C  | 0.18648  | 2.74600  | 0.92011  |
| C  | -0.58759 | 3.80437  | 0.42873  |
| C  | 1.10150  | 2.95567  | 1.93077  |

---

|   |          |          |          |
|---|----------|----------|----------|
| C | -0.41389 | 5.07390  | 0.95778  |
| C | 1.26586  | 4.23446  | 2.45396  |
| H | 1.68280  | 2.13794  | 2.34260  |
| C | 0.51304  | 5.28613  | 1.96544  |
| H | -1.00455 | 5.90555  | 0.58905  |
| H | 1.98166  | 4.40168  | 3.25031  |
| H | 0.64268  | 6.28012  | 2.37635  |
| C | -1.52290 | 2.07389  | -0.97170 |
| C | -2.32487 | 1.58705  | -1.98098 |
| C | -1.52326 | 3.42908  | -0.62103 |
| C | -3.17523 | 2.46034  | -2.65128 |
| H | -2.29325 | 0.54540  | -2.27765 |
| C | -2.38385 | 4.27993  | -1.30058 |
| C | -3.20579 | 3.79803  | -2.30518 |
| H | -3.80592 | 2.08638  | -3.44896 |
| H | -2.40736 | 5.33390  | -1.04629 |
| H | -3.86937 | 4.47598  | -2.82806 |
| O | 1.36928  | -0.20216 | 1.18196  |
| C | 3.60774  | -0.79151 | 1.52905  |
| C | 2.56573  | -0.05150 | 0.91296  |
| C | 6.02535  | -1.24935 | 1.70436  |
| C | 4.89311  | -0.56853 | 1.17448  |
| C | 7.27509  | -0.97658 | 1.30224  |
| H | 2.87058  | 0.68983  | 0.14989  |
| H | 5.08862  | 0.18934  | 0.41453  |
| H | 3.33832  | -1.53300 | 2.27459  |
| C | 8.49372  | -1.63268 | 1.80582  |
| H | 7.40799  | -0.20426 | 0.54512  |
| H | 5.85396  | -2.01021 | 2.46260  |
| H | 9.04588  | -2.10283 | 0.98681  |
| H | 9.17490  | -0.89477 | 2.23977  |
| H | 8.27109  | -2.38882 | 2.55842  |
| C | -2.75937 | -3.85609 | -1.52094 |
| H | -3.27659 | -3.71387 | -2.48337 |
| H | -2.36840 | -4.87386 | -1.50375 |
| O | -3.63680 | -3.70282 | -0.44638 |

---

|   |         |          |          |
|---|---------|----------|----------|
| C | 3.94451 | -0.72577 | -2.86243 |
| C | 2.86830 | 0.00627  | -3.33376 |
| F | 0.55330 | 0.32258  | -3.37556 |
| F | 2.29409 | -3.07422 | -0.71186 |
| H | 4.59863 | -2.36236 | -1.60507 |
| H | 2.99084 | 0.82604  | -4.02931 |
| H | 4.94369 | -0.47162 | -3.19408 |

**Catalyst 4p**

|    |          |          |          |
|----|----------|----------|----------|
| C  | -3.10964 | -1.20072 | 0.32328  |
| C  | -4.36620 | -1.99971 | -0.06088 |
| C  | -2.02259 | -2.59780 | -1.43012 |
| N  | -2.01473 | -1.51517 | -0.58855 |
| C  | -0.83600 | -0.87824 | -0.72244 |
| N  | -0.19089 | -1.61884 | -1.62313 |
| N  | -0.90930 | -2.69183 | -2.07871 |
| C  | -5.16073 | -2.04606 | 1.23476  |
| C  | -4.08981 | -2.05041 | 2.28587  |
| C  | -2.88883 | -1.59489 | 1.75673  |
| C  | -1.74258 | -1.53475 | 2.52226  |
| C  | -1.81457 | -1.93041 | 3.84994  |
| C  | -3.01324 | -2.37290 | 4.38749  |
| C  | -4.15916 | -2.43869 | 3.60875  |
| C  | 1.15245  | -1.44716 | -2.03706 |
| C  | 2.15247  | -2.22597 | -1.45951 |
| C  | 3.46959  | -2.07941 | -1.85531 |
| C  | 1.48999  | -0.51398 | -3.01176 |
| H  | -3.30888 | -0.12586 | 0.23597  |
| H  | -4.90456 | -1.54154 | -0.90319 |
| H  | -5.80945 | -2.92311 | 1.25774  |
| H  | -5.79869 | -1.16004 | 1.31729  |
| H  | -0.79617 | -1.20586 | 2.10329  |
| H  | -0.92692 | -1.89796 | 4.46985  |
| H  | -3.05219 | -2.68233 | 5.42501  |
| H  | -5.08915 | -2.80418 | 4.02987  |
| Au | -0.18356 | 0.98507  | 0.13683  |

---

|   |          |          |          |
|---|----------|----------|----------|
| C | 0.33516  | 2.79160  | 0.96187  |
| C | -0.47275 | 3.86792  | 0.57694  |
| C | 1.35833  | 2.97437  | 1.86918  |
| C | -0.22665 | 5.12569  | 1.10592  |
| C | 1.59716  | 4.24177  | 2.39104  |
| H | 1.97029  | 2.14363  | 2.20309  |
| C | 0.80860  | 5.31047  | 2.00778  |
| H | -0.84467 | 5.96950  | 0.81842  |
| H | 2.39886  | 4.38624  | 3.10584  |
| H | 0.99524  | 6.29538  | 2.41849  |
| C | -1.57371 | 2.17957  | -0.75436 |
| C | -2.47803 | 1.73179  | -1.69456 |
| C | -1.51887 | 3.52644  | -0.37591 |
| C | -3.37853 | 2.63216  | -2.25354 |
| H | -2.48923 | 0.69979  | -2.02635 |
| C | -2.42962 | 4.40588  | -0.94534 |
| C | -3.35634 | 3.96062  | -1.87210 |
| H | -4.09109 | 2.28663  | -2.99311 |
| H | -2.40969 | 5.45370  | -0.66701 |
| H | -4.05955 | 4.65971  | -2.30823 |
| O | 1.45828  | -0.14481 | 1.12204  |
| C | 3.71124  | -0.67594 | 1.44290  |
| C | 2.64163  | 0.00146  | 0.80110  |
| C | 6.14152  | -1.03651 | 1.65006  |
| C | 4.98845  | -0.43419 | 1.07189  |
| C | 7.38423  | -0.73613 | 1.24629  |
| H | 2.90988  | 0.68627  | -0.02555 |
| H | 5.16134  | 0.28343  | 0.26865  |
| H | 3.46773  | -1.37155 | 2.24024  |
| C | 8.62189  | -1.30832 | 1.80337  |
| H | 7.49600  | -0.00577 | 0.44551  |
| H | 5.99175  | -1.75644 | 2.45167  |
| H | 9.20679  | -1.79951 | 1.02031  |
| H | 9.26321  | -0.51742 | 2.20338  |
| H | 8.42004  | -2.02939 | 2.59528  |
| C | -3.24047 | -3.44217 | -1.53849 |

---

|    |          |          |          |
|----|----------|----------|----------|
| H  | -3.80936 | -3.13586 | -2.43115 |
| H  | -2.96491 | -4.48931 | -1.66667 |
| O  | -4.01440 | -3.32923 | -0.38187 |
| C  | 3.78714  | -1.14575 | -2.82562 |
| C  | 2.80877  | -0.35754 | -3.40255 |
| Cl | 0.26569  | 0.44643  | -3.74587 |
| Cl | 1.75234  | -3.35921 | -0.22636 |
| H  | 4.23223  | -2.69538 | -1.39564 |
| H  | 3.05070  | 0.36924  | -4.16688 |
| H  | 4.81686  | -1.03447 | -3.14349 |

**Catalyst 4q**

|   |          |          |          |
|---|----------|----------|----------|
| C | 3.07339  | -1.38019 | -0.36767 |
| C | 4.23290  | -2.28989 | 0.07302  |
| C | 1.81000  | -2.61205 | 1.39302  |
| N | 1.92493  | -1.56387 | 0.51605  |
| C | 0.80327  | -0.82062 | 0.58905  |
| N | 0.06677  | -1.47155 | 1.48916  |
| N | 0.67333  | -2.58463 | 2.00566  |
| C | 5.05255  | -2.45773 | -1.19676 |
| C | 4.01878  | -2.37193 | -2.28072 |
| C | 2.85696  | -1.78126 | -1.79999 |
| C | 1.75074  | -1.61149 | -2.60759 |
| C | 1.82405  | -2.03684 | -3.92590 |
| C | 2.98528  | -2.61495 | -4.41458 |
| C | 4.09024  | -2.78954 | -3.59466 |
| C | -1.27218 | -1.18221 | 1.85466  |
| C | -2.31420 | -1.87434 | 1.24205  |
| C | -3.62548 | -1.62024 | 1.60242  |
| C | -1.55844 | -0.23631 | 2.83270  |
| H | 3.37775  | -0.32886 | -0.29507 |
| H | 4.79329  | -1.86162 | 0.91665  |
| H | 5.59954  | -3.40174 | -1.17894 |
| H | 5.78834  | -1.65130 | -1.28163 |
| H | 0.83258  | -1.17172 | -2.22952 |
| H | 0.96685  | -1.91875 | -4.57741 |

---

|    |          |          |          |
|----|----------|----------|----------|
| H  | 3.02575  | -2.94436 | -5.44589 |
| H  | 4.98976  | -3.25848 | -3.97778 |
| Au | 0.37428  | 1.07795  | -0.33651 |
| C  | 0.07403  | 2.90272  | -1.22925 |
| C  | 0.99324  | 3.89372  | -0.86479 |
| C  | -0.90768 | 3.16684  | -2.16201 |
| C  | 0.89862  | 5.15206  | -1.43943 |
| C  | -0.99325 | 4.43418  | -2.73013 |
| H  | -1.60453 | 2.39927  | -2.47959 |
| C  | -0.09512 | 5.42012  | -2.36668 |
| H  | 1.60360  | 5.93086  | -1.16931 |
| H  | -1.76233 | 4.64260  | -3.46467 |
| H  | -0.16327 | 6.40494  | -2.81289 |
| C  | 1.87612  | 2.14036  | 0.54327  |
| C  | 2.71317  | 1.62949  | 1.51310  |
| C  | 1.98044  | 3.47003  | 0.11695  |
| C  | 3.70625  | 2.44080  | 2.05163  |
| H  | 2.59906  | 0.61842  | 1.88757  |
| C  | 2.98008  | 4.26065  | 0.66794  |
| C  | 3.84123  | 3.74760  | 1.62208  |
| H  | 4.36654  | 2.04395  | 2.81366  |
| H  | 3.08283  | 5.29269  | 0.35108  |
| H  | 4.61589  | 4.37771  | 2.04195  |
| O  | -1.36208 | 0.11912  | -1.33515 |
| C  | -3.65951 | -0.15979 | -1.67165 |
| C  | -2.52464 | 0.38346  | -1.01395 |
| C  | -6.11719 | -0.30201 | -1.82973 |
| C  | -4.90280 | 0.17880  | -1.26350 |
| C  | -7.31857 | 0.07483  | -1.36892 |
| H  | -2.72401 | 1.07912  | -0.17712 |
| H  | -4.99367 | 0.87362  | -0.42749 |
| H  | -3.49139 | -0.85059 | -2.49223 |
| C  | -8.61538 | -0.37738 | -1.90114 |
| H  | -7.34570 | 0.77485  | -0.53442 |
| H  | -6.05035 | -0.99587 | -2.66481 |
| H  | -9.20530 | -0.86257 | -1.11799 |



---

|    |          |          |          |
|----|----------|----------|----------|
| H  | -9.21092 | 0.47625  | -2.23779 |
| H  | -8.49767 | -1.07221 | -2.73255 |
| C  | 2.93885  | -3.56173 | 1.56529  |
| H  | 3.51633  | -3.27531 | 2.45902  |
| H  | 2.56091  | -4.57187 | 1.72575  |
| O  | 3.74177  | -3.56669 | 0.42347  |
| C  | -3.89514 | -0.66822 | 2.56951  |
| C  | -2.87104 | 0.02867  | 3.18394  |
| Br | -0.16995 | 0.68194  | 3.70800  |
| Br | -1.95808 | -3.15498 | -0.09036 |
| H  | -4.42615 | -2.17345 | 1.12757  |
| H  | -3.07963 | 0.76474  | 3.94950  |
| H  | -4.92126 | -0.47458 | 2.85894  |

**Catalyst 4r**

|   |          |          |          |
|---|----------|----------|----------|
| C | 3.10318  | -1.22089 | -0.32324 |
| C | 4.25016  | -2.19870 | -0.01963 |
| C | 1.71345  | -2.91995 | 0.84640  |
| N | 1.88112  | -1.65391 | 0.34997  |
| C | 0.73385  | -0.96638 | 0.52274  |
| N | -0.06750 | -1.86338 | 1.09945  |
| N | 0.51922  | -3.08246 | 1.30949  |
| C | 5.21107  | -1.97498 | -1.17567 |
| C | 4.29282  | -1.62683 | -2.31023 |
| C | 3.05385  | -1.22404 | -1.82633 |
| C | 2.02563  | -0.88526 | -2.68169 |
| C | 2.25622  | -0.94400 | -4.04842 |
| C | 3.49435  | -1.33157 | -4.53592 |
| C | 4.52152  | -1.67746 | -3.67010 |
| C | -1.45192 | -1.73376 | 1.40595  |
| C | -2.39024 | -2.32136 | 0.56172  |
| C | -3.73622 | -2.23654 | 0.88117  |
| C | -1.86202 | -1.07349 | 2.55994  |
| H | 3.35155  | -0.22410 | 0.06003  |
| H | 4.69015  | -2.02439 | 0.97312  |
| H | 5.81634  | -2.86525 | -1.35275 |

---

|    |          |          |          |
|----|----------|----------|----------|
| H  | 5.89289  | -1.15021 | -0.94379 |
| H  | 1.04785  | -0.59444 | -2.30839 |
| H  | 1.46130  | -0.69084 | -4.73918 |
| H  | 3.65714  | -1.37726 | -5.60607 |
| H  | 5.48151  | -1.99981 | -4.05779 |
| Au | 0.37573  | 1.08879  | -0.04698 |
| C  | 0.20448  | 3.02817  | -0.69810 |
| C  | 1.14615  | 3.91536  | -0.16415 |
| C  | -0.69743 | 3.45542  | -1.65100 |
| C  | 1.15132  | 5.23602  | -0.58642 |
| C  | -0.68279 | 4.78335  | -2.06588 |
| H  | -1.40645 | 2.77105  | -2.10341 |
| C  | 0.23574  | 5.66774  | -1.53213 |
| H  | 1.87552  | 5.93489  | -0.18182 |
| H  | -1.38921 | 5.11947  | -2.81592 |
| H  | 0.24605  | 6.70028  | -1.85943 |
| C  | 1.85266  | 1.95833  | 1.05999  |
| C  | 2.57075  | 1.29093  | 2.02960  |
| C  | 2.04253  | 3.32346  | 0.81740  |
| C  | 3.54099  | 1.98020  | 2.74899  |
| H  | 2.38160  | 0.24887  | 2.26149  |
| C  | 3.02174  | 3.98859  | 1.54318  |
| C  | 3.77014  | 3.31984  | 2.49594  |
| H  | 4.10703  | 1.46279  | 3.51441  |
| H  | 3.19175  | 5.04570  | 1.37083  |
| H  | 4.52782  | 3.85362  | 3.05668  |
| O  | -1.39042 | 0.36372  | -1.20662 |
| C  | -3.69946 | 0.32059  | -1.59281 |
| C  | -2.53171 | 0.71470  | -0.88987 |
| C  | -6.15277 | 0.44207  | -1.80685 |
| C  | -4.91243 | 0.75790  | -1.18433 |
| C  | -7.32033 | 0.92978  | -1.36219 |
| H  | -2.68587 | 1.37758  | -0.01721 |
| H  | -4.95418 | 1.40821  | -0.30956 |
| H  | -3.58506 | -0.32493 | -2.45791 |
| C  | -8.63784 | 0.66413  | -1.96430 |

---

|   |          |          |          |
|---|----------|----------|----------|
| H | -7.29922 | 1.58322  | -0.49058 |
| H | -6.13393 | -0.20805 | -2.67884 |
| H | -9.32022 | 0.22981  | -1.22799 |
| H | -9.10483 | 1.59923  | -2.28782 |
| H | -8.56969 | -0.00677 | -2.82047 |
| C | 2.85327  | -3.87252 | 0.86190  |
| H | 3.30388  | -3.86787 | 1.86746  |
| H | 2.50171  | -4.88526 | 0.66277  |
| O | 3.78916  | -3.53036 | -0.11487 |
| C | -4.14813 | -1.56409 | 2.01432  |
| C | -3.21475 | -0.98324 | 2.84942  |
| C | -0.88481 | -0.41198 | 3.50406  |
| C | -2.01757 | -3.11014 | -0.67661 |
| H | -4.46446 | -2.70064 | 0.22790  |
| H | -3.52942 | -0.47043 | 3.74903  |
| H | -5.20207 | -1.50402 | 2.25523  |
| F | -0.56582 | 0.80510  | 3.05687  |
| F | -1.40996 | -0.26545 | 4.70943  |
| F | 0.24564  | -1.09668 | 3.64181  |
| F | -2.97262 | -2.99945 | -1.59967 |
| F | -0.88611 | -2.70346 | -1.24039 |
| F | -1.89163 | -4.39779 | -0.38922 |

#### **Catalyst 4s**

|   |          |          |          |
|---|----------|----------|----------|
| C | -3.49427 | -1.41922 | 0.00125  |
| C | -4.55689 | -2.41776 | -0.48894 |
| C | -1.92342 | -2.94083 | -1.19693 |
| N | -2.19205 | -1.74868 | -0.57381 |
| C | -1.06829 | -1.00633 | -0.56598 |
| N | -0.18029 | -1.79754 | -1.16941 |
| N | -0.68948 | -3.00343 | -1.57277 |
| C | -5.62751 | -2.35030 | 0.58879  |
| C | -4.84172 | -2.03632 | 1.82767  |
| C | -3.59037 | -1.53214 | 1.49656  |
| C | -2.67294 | -1.19254 | 2.47022  |
| C | -3.03177 | -1.35306 | 3.80045  |

---

|    |          |          |          |
|----|----------|----------|----------|
| C  | -4.28442 | -1.84207 | 4.13674  |
| C  | -5.19740 | -2.19089 | 3.15247  |
| C  | 1.19831  | -1.53266 | -1.34599 |
| C  | 2.12854  | -2.10792 | -0.48079 |
| C  | 3.47706  | -1.86505 | -0.64789 |
| C  | 1.64003  | -0.71611 | -2.38016 |
| H  | -3.75043 | -0.40635 | -0.33357 |
| H  | -4.91946 | -2.17237 | -1.49750 |
| H  | -6.18008 | -3.28976 | 0.64072  |
| H  | -6.34598 | -1.55682 | 0.35879  |
| H  | -1.68301 | -0.82510 | 2.21553  |
| H  | -2.32626 | -1.09820 | 4.58181  |
| H  | -4.54862 | -1.96384 | 5.18038  |
| H  | -6.16878 | -2.59084 | 3.42115  |
| Au | -0.75751 | 1.01641  | 0.11998  |
| C  | -0.55481 | 2.95381  | 0.76593  |
| C  | -1.31437 | 3.89324  | 0.05917  |
| C  | 0.22019  | 3.34288  | 1.83894  |
| C  | -1.26674 | 5.22662  | 0.43620  |
| C  | 0.25906  | 4.68393  | 2.20758  |
| H  | 0.78574  | 2.62022  | 2.41640  |
| C  | -0.47857 | 5.61897  | 1.50576  |
| H  | -1.84910 | 5.96749  | -0.10081 |
| H  | 0.86501  | 4.99132  | 3.05191  |
| H  | -0.44687 | 6.66188  | 1.79673  |
| C  | -1.99902 | 1.94947  | -1.20055 |
| C  | -2.66241 | 1.29942  | -2.21993 |
| C  | -2.10272 | 3.33538  | -1.02942 |
| C  | -3.47493 | 2.03175  | -3.07902 |
| H  | -2.55025 | 0.23315  | -2.38084 |
| C  | -2.92016 | 4.04523  | -1.89826 |
| C  | -3.60512 | 3.39766  | -2.91178 |
| H  | -3.99787 | 1.52607  | -3.88208 |
| H  | -3.01847 | 5.11917  | -1.78513 |
| H  | -4.23850 | 3.96647  | -3.58158 |
| O  | 0.72634  | 0.20107  | 1.56451  |

---

|    |          |          |          |
|----|----------|----------|----------|
| C  | 2.91852  | 0.00213  | 2.36017  |
| C  | 1.93321  | 0.44172  | 1.44214  |
| C  | 5.30651  | -0.09547 | 2.97239  |
| C  | 4.22241  | 0.29076  | 2.13709  |
| C  | 6.57787  | 0.21859  | 2.67946  |
| H  | 2.29313  | 1.02913  | 0.57617  |
| H  | 4.47402  | 0.85795  | 1.23998  |
| H  | 2.59560  | -0.56529 | 3.22762  |
| C  | 7.75120  | -0.13947 | 3.49335  |
| H  | 6.76410  | 0.78227  | 1.76607  |
| H  | 5.08092  | -0.66049 | 3.87420  |
| H  | 8.45999  | -0.72981 | 2.90519  |
| H  | 8.29436  | 0.76003  | 3.79806  |
| H  | 7.47775  | -0.70345 | 4.38509  |
| C  | -3.01154 | -3.93001 | -1.40643 |
| H  | -3.38741 | -3.83556 | -2.43785 |
| H  | -2.62893 | -4.94398 | -1.28610 |
| O  | -4.03107 | -3.72828 | -0.47508 |
| C  | 3.89649  | -1.03671 | -1.67625 |
| C  | 2.99159  | -0.45719 | -2.54263 |
| Cl | 0.51300  | -0.02818 | -3.47877 |
| Cl | 1.60250  | -3.10396 | 0.81619  |
| H  | 4.19242  | -2.32221 | 0.02597  |
| C  | 5.37420  | -0.77852 | -1.81265 |
| H  | 3.32147  | 0.17993  | -3.35230 |
| F  | 5.83911  | -0.17570 | -0.70781 |
| F  | 6.04917  | -1.91057 | -1.94831 |
| F  | 5.65520  | 0.00161  | -2.84106 |

**Catalyst 4t**

|   |          |          |          |
|---|----------|----------|----------|
| C | -3.28658 | -1.41699 | -0.31689 |
| C | -4.35965 | -2.35812 | -0.89031 |
| C | -1.71441 | -3.03295 | -1.37254 |
| N | -1.96520 | -1.81968 | -0.79111 |
| C | -0.80730 | -1.12990 | -0.72271 |
| N | 0.08173  | -1.96616 | -1.26829 |

---

|    |          |          |          |
|----|----------|----------|----------|
| N  | -0.46331 | -3.15523 | -1.66928 |
| C  | -5.51610 | -2.20760 | 0.08433  |
| C  | -4.82534 | -1.93079 | 1.38659  |
| C  | -3.51823 | -1.51345 | 1.16618  |
| C  | -2.67248 | -1.22598 | 2.21792  |
| C  | -3.15841 | -1.34803 | 3.51140  |
| C  | -4.46635 | -1.74807 | 3.73564  |
| C  | -5.30836 | -2.04563 | 2.67446  |
| C  | 1.48205  | -1.75903 | -1.41500 |
| C  | 1.96228  | -0.52578 | -1.75026 |
| C  | 3.35248  | -0.29890 | -1.79784 |
| C  | 2.34665  | -2.84283 | -1.17623 |
| C  | 3.88784  | 0.97725  | -2.07271 |
| H  | -3.45932 | -0.39377 | -0.67185 |
| H  | -4.61464 | -2.11028 | -1.93075 |
| H  | -6.13392 | -3.10698 | 0.09257  |
| H  | -6.15495 | -1.37034 | -0.21561 |
| H  | -1.64236 | -0.92635 | 2.05250  |
| H  | -2.50990 | -1.13194 | 4.35157  |
| H  | -4.83103 | -1.84037 | 4.75167  |
| H  | -6.32485 | -2.37668 | 2.85599  |
| C  | 5.23910  | 1.17256  | -2.09474 |
| Au | -0.51344 | 0.84528  | 0.10901  |
| C  | -0.36006 | 2.72501  | 0.91055  |
| C  | -1.02718 | 3.72749  | 0.19712  |
| C  | 0.29180  | 3.01404  | 2.09110  |
| C  | -1.01316 | 5.02644  | 0.68179  |
| C  | 0.29708  | 4.32141  | 2.56703  |
| H  | 0.78380  | 2.23528  | 2.66360  |
| C  | -0.34991 | 5.31991  | 1.86250  |
| H  | -1.52532 | 5.81661  | 0.14329  |
| H  | 0.80552  | 4.55340  | 3.49565  |
| H  | -0.34431 | 6.33617  | 2.23766  |
| C  | -1.57569 | 1.89397  | -1.27648 |
| C  | -2.09382 | 1.33442  | -2.42556 |
| C  | -1.68300 | 3.26693  | -1.01822 |

---

|   |          |          |          |
|---|----------|----------|----------|
| C | -2.76863 | 2.14549  | -3.33257 |
| H | -1.97679 | 0.27936  | -2.64570 |
| C | -2.36587 | 4.05465  | -1.93455 |
| C | -2.90868 | 3.49687  | -3.07999 |
| H | -3.17672 | 1.71219  | -4.23800 |
| H | -2.46613 | 5.11984  | -1.75665 |
| H | -3.43597 | 4.12648  | -3.78639 |
| O | 0.86085  | -0.11916 | 1.57490  |
| C | 3.07311  | -0.70548 | 2.09264  |
| C | 2.07757  | 0.05384  | 1.42818  |
| C | 5.46855  | -1.24436 | 2.32309  |
| C | 4.37423  | -0.51735 | 1.77353  |
| C | 6.73444  | -1.01527 | 1.94670  |
| H | 2.44689  | 0.83237  | 0.73594  |
| H | 4.61634  | 0.23990  | 1.02550  |
| H | 2.76052  | -1.45607 | 2.81184  |
| C | 7.91943  | -1.71329 | 2.47515  |
| H | 6.90514  | -0.25038 | 1.18941  |
| H | 5.25405  | -2.00062 | 3.07508  |
| H | 8.47424  | -2.20071 | 1.66799  |
| H | 8.61505  | -1.00015 | 2.92721  |
| H | 7.65475  | -2.46291 | 3.22081  |
| C | -2.83041 | -3.97510 | -1.64359 |
| H | -3.11125 | -3.89740 | -2.70623 |
| H | -2.51299 | -5.00250 | -1.46216 |
| O | -3.91554 | -3.69642 | -0.81134 |
| C | 4.23609  | -1.38020 | -1.54495 |
| C | 3.69348  | -2.65009 | -1.25260 |
| C | 5.62597  | -1.14793 | -1.58943 |
| C | 6.11663  | 0.09846  | -1.85623 |
| H | 7.18687  | 0.26456  | -1.89576 |
| H | 5.64183  | 2.15539  | -2.30780 |
| H | 6.29790  | -1.98132 | -1.41123 |
| H | 3.20612  | 1.79952  | -2.26572 |
| H | 4.37148  | -3.47695 | -1.07051 |
| H | 1.92783  | -3.81208 | -0.93927 |

---

|   |         |         |          |
|---|---------|---------|----------|
| H | 1.28394 | 0.28816 | -1.98912 |
|---|---------|---------|----------|

**Catalyst 4u**

|   |          |          |          |
|---|----------|----------|----------|
| C | -3.03240 | -1.67081 | 0.07413  |
| C | -4.04907 | -2.74865 | -0.33834 |
| C | -1.48807 | -2.97864 | -1.38157 |
| N | -1.79204 | -1.84535 | -0.67533 |
| C | -0.76580 | -0.97856 | -0.80094 |
| N | 0.10328  | -1.63655 | -1.56646 |
| N | -0.32434 | -2.88433 | -1.93701 |
| C | -4.98827 | -2.82123 | 0.85405  |
| C | -4.09023 | -2.49063 | 2.00910  |
| C | -2.93660 | -1.85706 | 1.56318  |
| C | -1.94180 | -1.47890 | 2.44116  |
| C | -2.12014 | -1.73635 | 3.79274  |
| C | -3.27503 | -2.35585 | 4.24412  |
| C | -4.26802 | -2.73963 | 3.35500  |
| C | 1.36765  | -1.14298 | -2.00850 |
| C | 2.55262  | -1.71434 | -1.48861 |
| C | 3.78744  | -1.18424 | -1.95087 |
| C | 3.78436  | -0.11919 | -2.87676 |
| C | 2.61576  | 0.41664  | -3.33394 |
| C | 1.38856  | -0.10752 | -2.89766 |
| C | 2.56738  | -2.74133 | -0.52114 |
| C | 3.75179  | -3.22830 | -0.04681 |
| C | 4.97452  | -2.72120 | -0.51791 |
| C | 4.98973  | -1.72312 | -1.44791 |
| H | -3.41973 | -0.67425 | -0.17244 |
| H | -4.54662 | -2.50704 | -1.28855 |
| H | -5.45291 | -3.80620 | 0.92087  |
| H | -5.79001 | -2.08318 | 0.74644  |
| H | -1.02890 | -1.00545 | 2.09359  |
| H | -1.35002 | -1.45357 | 4.50001  |
| H | -3.39782 | -2.55215 | 5.30258  |
| H | -5.16108 | -3.24067 | 3.71157  |
| H | 4.73746  | 0.26777  | -3.22215 |



---

|    |          |          |          |
|----|----------|----------|----------|
| H  | 2.62453  | 1.23403  | -4.04366 |
| H  | 1.63184  | -3.14580 | -0.15410 |
| H  | 3.74985  | -4.01916 | 0.69353  |
| H  | 5.90545  | -3.12510 | -0.13800 |
| H  | 5.92936  | -1.32330 | -1.81618 |
| Au | -0.53335 | 1.00912  | -0.01203 |
| C  | -0.39966 | 2.90709  | 0.75220  |
| C  | -1.31463 | 3.82287  | 0.22051  |
| C  | 0.47383  | 3.28576  | 1.75035  |
| C  | -1.32716 | 5.12449  | 0.69825  |
| C  | 0.45198  | 4.59504  | 2.22062  |
| H  | 1.16592  | 2.57532  | 2.18871  |
| C  | -0.44318 | 5.50760  | 1.69407  |
| H  | -2.03128 | 5.84642  | 0.29861  |
| H  | 1.13513  | 4.89532  | 3.00659  |
| H  | -0.45874 | 6.52541  | 2.06474  |
| C  | -1.98469 | 1.92039  | -1.10876 |
| C  | -2.70031 | 1.28872  | -2.10412 |
| C  | -2.18040 | 3.27635  | -0.81502 |
| C  | -3.65943 | 2.00545  | -2.81274 |
| H  | -2.52372 | 0.24893  | -2.35591 |
| C  | -3.14560 | 3.96961  | -1.53214 |
| C  | -3.88229 | 3.33742  | -2.51970 |
| H  | -4.22466 | 1.51496  | -3.59625 |
| H  | -3.31958 | 5.01920  | -1.32177 |
| H  | -4.63100 | 3.89361  | -3.07072 |
| O  | 1.16890  | 0.22302  | 1.18410  |
| C  | 3.46509  | -0.00163 | 1.57484  |
| C  | 2.33640  | 0.43855  | 0.83694  |
| C  | 5.91825  | -0.04472 | 1.82422  |
| C  | 4.71095  | 0.31646  | 1.15840  |
| C  | 7.12294  | 0.32822  | 1.37243  |
| H  | 2.54451  | 1.00494  | -0.09050 |
| H  | 4.81147  | 0.90777  | 0.24755  |
| H  | 3.29346  | -0.58266 | 2.47582  |
| C  | 8.41079  | 0.00660  | 2.01280  |

---

|   |          |          |          |
|---|----------|----------|----------|
| H | 7.16022  | 0.92341  | 0.46017  |
| H | 5.83940  | -0.63720 | 2.73335  |
| H | 9.06399  | -0.53380 | 1.32158  |
| H | 8.94777  | 0.92229  | 2.27730  |
| H | 8.28044  | -0.59335 | 2.91340  |
| C | -2.48559 | -4.07508 | -1.48863 |
| H | -2.98850 | -4.00246 | -2.46642 |
| H | -1.99162 | -5.04634 | -1.44533 |
| O | -3.40400 | -4.00135 | -0.44016 |
| H | 0.45273  | 0.29819  | -3.26630 |

#### **Catalyst 4v**

|   |          |          |          |
|---|----------|----------|----------|
| C | -3.45509 | -1.42845 | -0.44170 |
| C | -4.48322 | -2.30260 | -1.17970 |
| C | -1.82771 | -2.59546 | -1.92482 |
| N | -2.13849 | -1.58701 | -1.05127 |
| C | -1.03705 | -0.82964 | -0.86997 |
| N | -0.12197 | -1.42285 | -1.63517 |
| N | -0.59180 | -2.52560 | -2.29775 |
| C | -5.58317 | -2.49847 | -0.14946 |
| C | -4.83518 | -2.47423 | 1.15048  |
| C | -3.58512 | -1.89127 | 0.98287  |
| C | -2.69988 | -1.77911 | 2.03559  |
| C | -3.08879 | -2.25446 | 3.27958  |
| C | -4.34000 | -2.82441 | 3.45499  |
| C | -5.22186 | -2.94037 | 2.39079  |
| C | 1.23274  | -0.99992 | -1.78582 |
| C | 2.27829  | -1.81418 | -1.24670 |
| C | 3.61113  | -1.35362 | -1.36675 |
| C | 1.47735  | 0.18235  | -2.38838 |
| C | 2.01591  | -3.02444 | -0.58373 |
| C | 3.03680  | -3.77649 | -0.06495 |
| C | 4.35526  | -3.33981 | -0.19711 |
| C | 4.63034  | -2.15621 | -0.83164 |
| H | -3.72816 | -0.37020 | -0.53405 |
| H | -4.82299 | -1.83978 | -2.11734 |

---

|    |          |          |          |
|----|----------|----------|----------|
| H  | -6.12248 | -3.42906 | -0.33341 |
| H  | -6.30681 | -1.67892 | -0.20997 |
| H  | -1.71271 | -1.34701 | 1.90356  |
| H  | -2.40823 | -2.18197 | 4.11915  |
| H  | -4.62774 | -3.19307 | 4.43234  |
| H  | -6.19281 | -3.40281 | 2.52963  |
| H  | 0.99417  | -3.37043 | -0.48995 |
| H  | 2.82037  | -4.71177 | 0.43688  |
| H  | 5.16652  | -3.93795 | 0.20097  |
| H  | 5.66254  | -1.84098 | -0.91740 |
| Au | -0.74341 | 0.94459  | 0.30896  |
| C  | -0.54860 | 2.66042  | 1.41733  |
| C  | -1.28411 | 3.75332  | 0.94235  |
| C  | 0.20217  | 2.76909  | 2.56934  |
| C  | -1.23935 | 4.95429  | 1.63390  |
| C  | 0.24022  | 3.97989  | 3.25383  |
| H  | 0.75182  | 1.92142  | 2.96362  |
| C  | -0.47573 | 5.06561  | 2.78449  |
| H  | -1.80349 | 5.81040  | 1.27980  |
| H  | 0.82845  | 4.06687  | 4.15984  |
| H  | -0.44542 | 6.00626  | 3.32110  |
| C  | -1.93140 | 2.18697  | -0.77900 |
| C  | -2.55216 | 1.81791  | -1.95426 |
| C  | -2.03844 | 3.48959  | -0.27512 |
| C  | -3.32560 | 2.75003  | -2.63878 |
| H  | -2.44146 | 0.82094  | -2.36576 |
| C  | -2.81928 | 4.40104  | -0.97262 |
| C  | -3.46226 | 4.03238  | -2.14214 |
| H  | -3.81557 | 2.46512  | -3.56227 |
| H  | -2.92169 | 5.41434  | -0.59979 |
| H  | -4.06750 | 4.75630  | -2.67419 |
| O  | 0.68836  | -0.25976 | 1.51310  |
| C  | 2.87577  | -0.82082 | 2.14191  |
| C  | 1.90473  | -0.04331 | 1.46097  |
| C  | 5.26065  | -1.22320 | 2.62796  |
| C  | 4.18700  | -0.52220 | 2.00663  |

---

|   |          |          |          |
|---|----------|----------|----------|
| C | 6.53978  | -0.86308 | 2.45912  |
| H | 2.28941  | 0.80522  | 0.86596  |
| H | 4.45754  | 0.32384  | 1.37267  |
| H | 2.53617  | -1.65399 | 2.74948  |
| C | 7.70179  | -1.52825 | 3.07560  |
| H | 6.74415  | -0.00543 | 1.81814  |
| H | 5.01437  | -2.07441 | 3.25951  |
| H | 8.40105  | -1.87702 | 2.31009  |
| H | 8.26421  | -0.82365 | 3.69523  |
| H | 7.40676  | -2.37649 | 3.69343  |
| C | -2.88200 | -3.54348 | -2.37017 |
| H | -3.23821 | -3.23772 | -3.36703 |
| H | -2.47407 | -4.55067 | -2.46205 |
| O | -3.92873 | -3.57411 | -1.44691 |
| H | 0.65581  | 0.76906  | -2.78810 |
| C | 3.88084  | -0.07912 | -1.99755 |
| C | 2.80362  | 0.68185  | -2.50539 |
| C | 3.04450  | 1.92325  | -3.11456 |
| C | 4.31699  | 2.41568  | -3.22056 |
| C | 5.38684  | 1.67299  | -2.71531 |
| C | 5.17263  | 0.45634  | -2.11845 |
| H | 2.20053  | 2.48598  | -3.49885 |
| H | 4.49580  | 3.37381  | -3.69270 |
| H | 6.39598  | 2.05819  | -2.79957 |
| H | 6.02592  | -0.09639 | -1.74585 |

**Catalyst 4w**

|   |          |          |          |
|---|----------|----------|----------|
| C | -3.50707 | -1.58878 | -0.52791 |
| C | -4.45778 | -2.52925 | -1.28781 |
| C | -1.76774 | -2.65654 | -1.95869 |
| N | -2.16760 | -1.66627 | -1.10130 |
| C | -1.12204 | -0.84188 | -0.88786 |
| N | -0.14746 | -1.37931 | -1.62022 |
| N | -0.52704 | -2.51172 | -2.29182 |
| C | -5.56955 | -2.79090 | -0.28506 |
| C | -4.85963 | -2.71282 | 1.03393  |

---

|    |          |          |          |
|----|----------|----------|----------|
| C  | -3.64365 | -2.05456 | 0.89537  |
| C  | -2.79344 | -1.88522 | 1.96940  |
| C  | -3.18586 | -2.37757 | 3.20580  |
| C  | -4.40516 | -3.02006 | 3.35290  |
| C  | -5.24988 | -3.19535 | 2.26684  |
| C  | 1.18620  | -0.88208 | -1.72400 |
| C  | 2.25208  | -1.65190 | -1.15450 |
| C  | 3.55742  | -1.10414 | -1.23466 |
| C  | 1.38643  | 0.32078  | -2.30523 |
| C  | 2.06126  | -2.87083 | -0.50750 |
| C  | 3.13573  | -3.55393 | 0.03401  |
| C  | 4.41469  | -3.04005 | -0.05658 |
| C  | 4.64942  | -1.81740 | -0.68136 |
| H  | -3.84386 | -0.54992 | -0.63344 |
| H  | -4.80248 | -2.09192 | -2.23583 |
| H  | -6.04342 | -3.75502 | -0.47661 |
| H  | -6.34216 | -2.01964 | -0.37021 |
| H  | -1.82924 | -1.39761 | 1.86096  |
| H  | -2.53279 | -2.26093 | 4.06205  |
| H  | -4.69590 | -3.40015 | 4.32498  |
| H  | -6.19391 | -3.71595 | 2.38356  |
| H  | 1.06785  | -3.29620 | -0.43834 |
| H  | 2.97043  | -4.50561 | 0.52470  |
| H  | 5.25500  | -3.58265 | 0.36429  |
| C  | 5.95739  | -1.25044 | -0.76894 |
| Au | -1.00325 | 0.94298  | 0.30467  |
| C  | -0.96402 | 2.66195  | 1.42328  |
| C  | -1.75610 | 3.70439  | 0.92716  |
| C  | -0.26117 | 2.81502  | 2.60010  |
| C  | -1.82216 | 4.89937  | 1.62739  |
| C  | -0.33277 | 4.02004  | 3.29202  |
| H  | 0.33502  | 2.00606  | 3.00790  |
| C  | -1.10948 | 5.05503  | 2.80523  |
| H  | -2.43345 | 5.71588  | 1.25812  |
| H  | 0.21732  | 4.14197  | 4.21781  |
| H  | -1.16591 | 5.99065  | 3.34838  |

---

|   |          |          |          |
|---|----------|----------|----------|
| C | -2.22521 | 2.11103  | -0.82725 |
| C | -2.77939 | 1.70549  | -2.02340 |
| C | -2.44413 | 3.39827  | -0.31947 |
| C | -3.59560 | 2.58419  | -2.72879 |
| H | -2.58478 | 0.72049  | -2.43253 |
| C | -3.26411 | 4.25649  | -1.03894 |
| C | -3.83920 | 3.85045  | -2.23133 |
| H | -4.03380 | 2.27125  | -3.66903 |
| H | -3.45258 | 5.25704  | -0.66538 |
| H | -4.47684 | 4.53280  | -2.78023 |
| O | 0.41255  | -0.19058 | 1.58595  |
| C | 2.59439  | -0.70046 | 2.27461  |
| C | 1.62511  | 0.05591  | 1.56985  |
| C | 4.96797  | -1.04405 | 2.84553  |
| C | 3.90173  | -0.36449 | 2.18984  |
| C | 6.24202  | -0.64399 | 2.73571  |
| H | 2.00386  | 0.91846  | 0.99116  |
| H | 4.17537  | 0.49341  | 1.57317  |
| H | 2.25841  | -1.54869 | 2.86314  |
| C | 7.39777  | -1.29543 | 3.37794  |
| H | 6.44768  | 0.23161  | 2.12084  |
| H | 4.72117  | -1.91451 | 3.45011  |
| H | 8.12590  | -1.61577 | 2.62625  |
| H | 7.92827  | -0.59144 | 4.02554  |
| H | 7.10300  | -2.16139 | 3.97085  |
| C | -2.74870 | -3.66801 | -2.43086 |
| H | -3.09641 | -3.38443 | -3.43721 |
| H | -2.27766 | -4.64835 | -2.51018 |
| O | -3.81602 | -3.76302 | -1.53560 |
| H | 0.54507  | 0.86659  | -2.72148 |
| C | 3.77571  | 0.16029  | -1.83741 |
| C | 2.68996  | 0.89074  | -2.37886 |
| C | 2.92210  | 2.13341  | -2.96351 |
| C | 4.20099  | 2.65556  | -3.01634 |
| C | 5.26708  | 1.95224  | -2.48642 |
| C | 5.08068  | 0.70602  | -1.89190 |

---

|   |         |          |          |
|---|---------|----------|----------|
| H | 2.08640 | 2.68611  | -3.37860 |
| H | 4.36905 | 3.62168  | -3.47637 |
| H | 6.26892 | 2.36564  | -2.53323 |
| C | 6.16351 | -0.04585 | -1.34216 |
| H | 7.16247 | 0.37235  | -1.40779 |
| H | 6.78844 | -1.82117 | -0.36660 |

**Catalyst 4x**

|   |          |          |          |
|---|----------|----------|----------|
| C | -3.02018 | -1.65376 | 0.19946  |
| C | -4.09744 | -2.66729 | -0.22284 |
| C | -1.65056 | -2.80389 | -1.53530 |
| N | -1.86508 | -1.75158 | -0.68584 |
| C | -0.82051 | -0.90361 | -0.78701 |
| N | -0.02521 | -1.49446 | -1.67619 |
| N | -0.52383 | -2.67773 | -2.15686 |
| C | -4.90174 | -2.87597 | 1.05011  |
| C | -3.87638 | -2.69138 | 2.12959  |
| C | -2.76746 | -2.01465 | 1.63688  |
| C | -1.67436 | -1.74818 | 2.43633  |
| C | -1.70926 | -2.16277 | 3.75997  |
| C | -2.81906 | -2.82534 | 4.26091  |
| C | -3.90991 | -3.09716 | 3.44849  |
| C | 1.25965  | -1.03481 | -2.10514 |
| C | 2.40123  | -1.64175 | -1.52549 |
| C | 3.67680  | -1.19495 | -1.95802 |
| C | 3.74791  | -0.16196 | -2.91578 |
| C | 2.62002  | 0.38981  | -3.44241 |
| C | 1.33426  | -0.05201 | -3.05994 |
| C | 2.33412  | -2.65891 | -0.54925 |
| C | 3.47645  | -3.21876 | -0.05004 |
| C | 4.73885  | -2.78885 | -0.49105 |
| C | 4.83364  | -1.79371 | -1.42017 |
| H | -3.41284 | -0.63289 | 0.11369  |
| H | -4.69174 | -2.30896 | -1.07591 |
| H | -5.37505 | -3.85903 | 1.05091  |
| H | -5.69619 | -2.12576 | 1.12154  |

---

|    |          |          |          |
|----|----------|----------|----------|
| H  | -0.79606 | -1.24002 | 2.04851  |
| H  | -0.86204 | -1.96863 | 4.40634  |
| H  | -2.82944 | -3.14407 | 5.29629  |
| H  | -4.76737 | -3.63227 | 3.84109  |
| H  | 4.72582  | 0.17537  | -3.24380 |
| H  | 2.69394  | 1.16763  | -4.19417 |
| C  | 0.12589  | 0.54168  | -3.70395 |
| H  | 1.36911  | -3.00415 | -0.19501 |
| H  | 3.40742  | -4.00726 | 0.68987  |
| H  | 5.63458  | -3.24707 | -0.08874 |
| H  | 5.80314  | -1.44889 | -1.76632 |
| Au | -0.53554 | 1.02439  | 0.12391  |
| C  | -0.31602 | 2.89300  | 0.94589  |
| C  | -1.21768 | 3.85248  | 0.47136  |
| C  | 0.61490  | 3.22332  | 1.90926  |
| C  | -1.15426 | 5.14735  | 0.96307  |
| C  | 0.66766  | 4.52562  | 2.39637  |
| H  | 1.29624  | 2.48201  | 2.31142  |
| C  | -0.21051 | 5.48149  | 1.92049  |
| H  | -1.84600 | 5.90223  | 0.60503  |
| H  | 1.39609  | 4.78615  | 3.15529  |
| H  | -0.16668 | 6.49423  | 2.30264  |
| C  | -2.04735 | 1.99614  | -0.83646 |
| C  | -2.88432 | 1.40409  | -1.75991 |
| C  | -2.16789 | 3.35423  | -0.51316 |
| C  | -3.87396 | 2.16489  | -2.37344 |
| H  | -2.78164 | 0.35838  | -2.02795 |
| C  | -3.16238 | 4.09418  | -1.13791 |
| C  | -4.01004 | 3.50406  | -2.05952 |
| H  | -4.53216 | 1.70287  | -3.09953 |
| H  | -3.27567 | 5.14619  | -0.89977 |
| H  | -4.78050 | 4.09610  | -2.53829 |
| O  | 1.17860  | 0.15473  | 1.21341  |
| C  | 3.47632  | -0.08365 | 1.57772  |
| C  | 2.34313  | 0.43096  | 0.89987  |
| C  | 5.93013  | -0.18475 | 1.78277  |



---

|   |          |          |          |
|---|----------|----------|----------|
| C | 4.72006  | 0.26314  | 1.17841  |
| C | 7.13553  | 0.19940  | 1.34205  |
| H | 2.53998  | 1.12912  | 0.06537  |
| H | 4.81598  | 0.94097  | 0.32930  |
| H | 3.31101  | -0.76324 | 2.40818  |
| C | 8.42614  | -0.21506 | 1.92033  |
| H | 7.17147  | 0.87628  | 0.48875  |
| H | 5.85315  | -0.85941 | 2.63302  |
| H | 9.04787  | -0.70811 | 1.16738  |
| H | 8.99603  | 0.65705  | 2.25394  |
| H | 8.29712  | -0.89134 | 2.76544  |
| C | -2.69002 | -3.85562 | -1.68330 |
| H | -3.28671 | -3.64221 | -2.58477 |
| H | -2.22654 | -4.83329 | -1.81927 |
| O | -3.49566 | -3.90413 | -0.54384 |
| H | 0.38049  | 0.95972  | -4.67764 |
| H | -0.66372 | -0.19763 | -3.85013 |
| H | -0.29471 | 1.35281  | -3.10167 |

**Catalyst 4y**

|   |          |          |          |
|---|----------|----------|----------|
| C | -3.03757 | -1.62627 | 0.24645  |
| C | -4.10344 | -2.65527 | -0.16566 |
| C | -1.59224 | -2.91775 | -1.31983 |
| N | -1.83352 | -1.80326 | -0.56026 |
| C | -0.77862 | -0.97071 | -0.67598 |
| N | 0.05000  | -1.63647 | -1.48030 |
| N | -0.43802 | -2.84771 | -1.89654 |
| C | -4.99063 | -2.75329 | 1.06481  |
| C | -4.03154 | -2.50184 | 2.19062  |
| C | -2.88129 | -1.88016 | 1.71994  |
| C | -1.83712 | -1.56833 | 2.56620  |
| C | -1.96084 | -1.88286 | 3.91184  |
| C | -3.11112 | -2.49179 | 4.38864  |
| C | -4.15463 | -2.80712 | 3.53106  |
| C | 1.33693  | -1.21281 | -1.91251 |
| C | 2.48317  | -1.77554 | -1.29828 |

---

|    |          |          |          |
|----|----------|----------|----------|
| C  | 3.76024  | -1.35313 | -1.75227 |
| C  | 3.84153  | -0.38485 | -2.77533 |
| C  | 2.72320  | 0.13929  | -3.34816 |
| C  | 1.45540  | -0.29271 | -2.92189 |
| C  | 2.41019  | -2.72920 | -0.26106 |
| C  | 3.55107  | -3.24845 | 0.28269  |
| C  | 4.81530  | -2.83984 | -0.17316 |
| C  | 4.91452  | -1.90837 | -1.16552 |
| H  | -3.40765 | -0.61052 | 0.06046  |
| H  | -4.63493 | -2.35593 | -1.08059 |
| H  | -5.48308 | -3.72590 | 1.10981  |
| H  | -5.77210 | -1.98729 | 1.02680  |
| H  | -0.92885 | -1.10055 | 2.19861  |
| H  | -1.15208 | -1.65234 | 4.59452  |
| H  | -3.19095 | -2.73365 | 5.44173  |
| H  | -5.04486 | -3.29907 | 3.90690  |
| H  | 4.82203  | -0.06850 | -3.11552 |
| H  | 2.78437  | 0.87065  | -4.14356 |
| Cl | 0.06533  | 0.34609  | -3.71113 |
| H  | 1.44290  | -3.05401 | 0.10420  |
| H  | 3.47955  | -3.98833 | 1.07089  |
| H  | 5.70932  | -3.26643 | 0.26588  |
| H  | 5.88541  | -1.58220 | -1.52479 |
| Au | -0.52078 | 1.00982  | 0.13434  |
| C  | -0.34693 | 2.90340  | 0.90733  |
| C  | -1.28419 | 3.82500  | 0.42762  |
| C  | 0.58072  | 3.27877  | 1.85724  |
| C  | -1.26046 | 5.12798  | 0.90079  |
| C  | 0.59403  | 4.58901  | 2.32533  |
| H  | 1.29009  | 2.56672  | 2.26358  |
| C  | -0.32028 | 5.50772  | 1.84475  |
| H  | -1.97974 | 5.85369  | 0.53670  |
| H  | 1.32060  | 4.88494  | 3.07299  |
| H  | -0.30718 | 6.52691  | 2.21168  |
| C  | -2.04176 | 1.92990  | -0.86518 |
| C  | -2.82785 | 1.30585  | -1.81056 |

---

|   |          |          |          |
|---|----------|----------|----------|
| C | -2.21486 | 3.28377  | -0.55204 |
| C | -3.83205 | 2.02824  | -2.44645 |
| H | -2.66426 | 0.27142  | -2.09034 |
| C | -3.22525 | 3.98392  | -1.19681 |
| C | -4.03075 | 3.35985  | -2.13353 |
| H | -4.45006 | 1.54272  | -3.19234 |
| H | -3.38016 | 5.03246  | -0.96703 |
| H | -4.81332 | 3.92085  | -2.62979 |
| O | 1.21594  | 0.20911  | 1.26811  |
| C | 3.51683  | 0.03648  | 1.65906  |
| C | 2.37612  | 0.49021  | 0.94848  |
| C | 5.97295  | -0.00578 | 1.87152  |
| C | 4.75487  | 0.38145  | 1.24169  |
| C | 7.17018  | 0.38967  | 1.41840  |
| H | 2.56814  | 1.13948  | 0.07341  |
| H | 4.83964  | 1.00923  | 0.35361  |
| H | 3.36087  | -0.58931 | 2.53245  |
| C | 8.46787  | 0.04222  | 2.02422  |
| H | 7.19294  | 1.02612  | 0.53403  |
| H | 5.90892  | -0.63873 | 2.75427  |
| H | 9.11172  | -0.46421 | 1.29933  |
| H | 9.00703  | 0.94628  | 2.32208  |
| H | 8.35229  | -0.59850 | 2.89837  |
| C | -2.63368 | -3.97086 | -1.44168 |
| H | -3.17392 | -3.82719 | -2.39119 |
| H | -2.17429 | -4.95930 | -1.47069 |
| O | -3.50405 | -3.92055 | -0.35151 |

### 7.3 Cartesian coordinates of the substrates

#### 3b

|   |          |          |          |
|---|----------|----------|----------|
| H | -4.48088 | -1.60787 | -0.00006 |
| C | -4.59711 | -0.50599 | -0.00005 |
| C | -3.33662 | 0.25172  | -0.00003 |
| O | -5.68659 | 0.00203  | -0.00007 |

---

|   |          |          |          |
|---|----------|----------|----------|
| C | -2.16056 | -0.38313 | -0.00002 |
| C | -0.87768 | 0.29124  | 0.00000  |
| C | 0.28755  | -0.35584 | 0.00001  |
| C | 1.56213  | 0.40151  | 0.00003  |
| O | 2.61341  | -0.42567 | 0.00002  |
| O | 1.65289  | 1.60006  | 0.00005  |
| C | 3.90101  | 0.20752  | 0.00004  |
| C | 4.94472  | -0.88128 | 0.00002  |
| H | -3.40982 | 1.33371  | -0.00002 |
| H | -2.14843 | -1.47080 | -0.00003 |
| H | -0.86765 | 1.37700  | 0.00001  |
| H | 0.34994  | -1.43694 | -0.00001 |
| H | 3.97231  | 0.84764  | 0.88061  |
| H | 3.97232  | 0.84769  | -0.88049 |
| H | 5.93991  | -0.43679 | 0.00004  |
| H | 4.84702  | -1.50979 | 0.88481  |
| H | 4.84703  | -1.50974 | -0.88482 |

**3c**

|   |          |          |          |
|---|----------|----------|----------|
| C | 4.07910  | -0.35382 | -0.00003 |
| C | 2.77111  | 0.31919  | -0.00003 |
| O | 5.13203  | 0.22612  | -0.00003 |
| C | 1.63913  | -0.39076 | -0.00002 |
| C | 0.31558  | 0.20005  | -0.00001 |
| C | -0.80596 | -0.51982 | -0.00001 |
| C | -2.12528 | 0.15526  | -0.00000 |
| O | -3.12184 | -0.73855 | 0.00003  |
| O | -2.29594 | 1.34454  | 0.00002  |
| C | -4.43572 | -0.18314 | 0.00005  |
| H | 4.03695  | -1.46096 | -0.00002 |
| H | 2.77354  | 1.40359  | -0.00002 |
| H | 1.69725  | -1.47693 | -0.00002 |
| H | 0.23659  | 1.28298  | -0.00001 |
| H | -0.80004 | -1.60259 | -0.00001 |
| H | -5.11621 | -1.02887 | 0.00009  |
| H | -4.58493 | 0.43209  | 0.88652  |

---

|   |          |         |          |
|---|----------|---------|----------|
| H | -4.58498 | 0.43205 | -0.88643 |
|---|----------|---------|----------|

**3d**

|   |          |          |          |
|---|----------|----------|----------|
| C | 5.30497  | 0.43197  | -0.00003 |
| C | 4.01699  | -0.27733 | -0.00003 |
| O | 6.37464  | -0.11697 | -0.00004 |
| C | 2.86513  | 0.40054  | -0.00001 |
| C | 1.55850  | -0.22669 | -0.00001 |
| C | 0.41680  | 0.46070  | 0.00000  |
| C | -0.88609 | -0.25472 | 0.00000  |
| O | -1.89501 | 0.61763  | 0.00002  |
| O | -0.99560 | -1.45304 | -0.00001 |
| C | -3.28211 | 0.16258  | 0.00002  |
| C | -3.56814 | -0.63688 | 1.26374  |
| C | -3.56815 | -0.63686 | -1.26371 |
| C | -4.06705 | 1.46449  | 0.00004  |
| H | 5.23098  | 1.53748  | -0.00002 |
| H | 4.04945  | -1.36126 | -0.00003 |
| H | 2.89318  | 1.48793  | -0.00001 |
| H | 1.50972  | -1.31136 | -0.00002 |
| H | 0.39276  | 1.54323  | 0.00001  |
| H | -3.28546 | -0.05885 | 2.14491  |
| H | -4.63833 | -0.84122 | 1.31848  |
| H | -3.02896 | -1.58102 | 1.26637  |
| H | -4.63835 | -0.84120 | -1.31844 |
| H | -3.28549 | -0.05881 | -2.14487 |
| H | -3.02898 | -1.58100 | -1.26636 |
| H | -3.82574 | 2.05266  | -0.88570 |
| H | -5.13641 | 1.25301  | 0.00004  |
| H | -3.82573 | 2.05264  | 0.88578  |

**3e**

|   |         |         |          |
|---|---------|---------|----------|
| C | 6.86400 | 3.10481 | -0.27058 |
| C | 6.14703 | 1.97707 | 0.34296  |
| O | 7.68178 | 3.77309 | 0.30383  |
| C | 5.24876 | 1.27837 | -0.35783 |

---

|   |          |          |          |
|---|----------|----------|----------|
| C | 4.50092  | 0.15698  | 0.17509  |
| C | 3.60810  | -0.52843 | -0.53873 |
| C | 2.87454  | -1.66493 | 0.06921  |
| O | 2.02927  | -2.20946 | -0.81328 |
| O | 3.01815  | -2.05110 | 1.19865  |
| C | 1.23572  | -3.31199 | -0.34589 |
| C | 0.01940  | -2.83622 | 0.42479  |
| C | -0.90398 | -1.94162 | -0.39312 |
| C | -3.05663 | -0.58695 | -0.40892 |
| C | -2.13944 | -1.50771 | 0.38564  |
| C | -4.29750 | -0.16269 | 0.36645  |
| C | -5.20952 | 0.76920  | -0.42118 |
| C | -6.45265 | 1.18934  | 0.35244  |
| C | -7.36556 | 2.12104  | -0.43508 |
| C | -8.60526 | 2.53085  | 0.34930  |
| H | 6.59910  | 3.31037  | -1.32645 |
| H | 6.38073  | 1.74602  | 1.37654  |
| H | 5.05466  | 1.55509  | -1.39186 |
| H | 4.67815  | -0.13645 | 1.20547  |
| H | 3.38463  | -0.28797 | -1.57086 |
| H | 1.86213  | -3.95863 | 0.26770  |
| H | 0.94324  | -3.83954 | -1.25343 |
| H | 0.35233  | -2.31638 | 1.32644  |
| H | -0.52589 | -3.72509 | 0.75697  |
| H | -1.21310 | -2.47032 | -1.30162 |
| H | -0.35431 | -1.05616 | -0.72499 |
| H | -3.36122 | -1.08802 | -1.33428 |
| H | -2.49776 | 0.30442  | -0.71372 |
| H | -1.82750 | -1.00145 | 1.30544  |
| H | -2.70018 | -2.39459 | 0.70033  |
| H | -3.99234 | 0.33004  | 1.29602  |
| H | -4.86043 | -1.05397 | 0.66410  |
| H | -5.51186 | 0.27812  | -1.35266 |
| H | -4.64748 | 1.66220  | -0.71546 |
| H | -6.15150 | 1.68098  | 1.28414  |
| H | -7.01535 | 0.29669  | 0.64708  |

---

|   |          |         |          |
|---|----------|---------|----------|
| H | -7.66392 | 1.62839 | -1.36538 |
| H | -6.80243 | 3.01235 | -0.72743 |
| H | -9.24928 | 3.19077 | -0.23275 |
| H | -9.19209 | 1.65500 | 0.63330  |
| H | -8.32957 | 3.05508 | 1.26650  |

**3f**

|   |          |          |          |
|---|----------|----------|----------|
| C | -5.72519 | -0.94361 | -0.09904 |
| C | -4.59474 | -0.03659 | 0.15013  |
| O | -6.86544 | -0.69058 | 0.18630  |
| C | -3.35155 | -0.38740 | -0.19226 |
| C | -2.18802 | 0.44989  | 0.02186  |
| C | -0.95221 | 0.08535  | -0.31892 |
| C | 0.19091  | 0.99538  | -0.06640 |
| O | 1.34324  | 0.44123  | -0.45916 |
| O | 0.10625  | 2.08808  | 0.42707  |
| C | 2.51978  | 1.23676  | -0.25255 |
| C | 3.71802  | 0.42176  | -0.68331 |
| C | 3.87972  | -0.91825 | 0.03801  |
| C | 3.92547  | -0.75037 | 1.55358  |
| C | 5.13737  | -1.62117 | -0.46232 |
| H | -5.45731 | -1.90483 | -0.58059 |
| H | -4.81782 | 0.91540  | 0.61926  |
| H | -3.18672 | -1.35597 | -0.65921 |
| H | -2.33259 | 1.42215  | 0.48328  |
| H | -0.73762 | -0.86985 | -0.78194 |
| H | 2.56675  | 1.52072  | 0.79958  |
| H | 2.42682  | 2.15458  | -0.83557 |
| H | 4.60960  | 1.03365  | -0.50693 |
| H | 3.66199  | 0.24728  | -1.76124 |
| H | 3.01442  | -1.53829 | -0.21291 |
| H | 4.72349  | -0.05908 | 1.83975  |
| H | 2.98574  | -0.36646 | 1.95257  |
| H | 4.12309  | -1.70651 | 2.04042  |
| H | 6.02665  | -1.03766 | -0.20875 |
| H | 5.24546  | -2.60714 | -0.00795 |

---

|   |         |          |          |
|---|---------|----------|----------|
| H | 5.11814 | -1.74844 | -1.54621 |
|---|---------|----------|----------|

**3g**

|   |          |          |          |
|---|----------|----------|----------|
| C | -5.95976 | 0.63722  | -0.51049 |
| C | -4.68184 | 0.48273  | 0.20088  |
| O | -6.93312 | 1.15989  | -0.03654 |
| C | -3.63840 | -0.10622 | -0.39073 |
| C | -2.34932 | -0.29073 | 0.24530  |
| C | -1.31120 | -0.86817 | -0.35887 |
| C | -0.02074 | -1.01416 | 0.35554  |
| O | 0.89819  | -1.58901 | -0.43054 |
| O | 0.17972  | -0.67041 | 1.49007  |
| C | 2.21421  | -1.74000 | 0.13436  |
| C | 3.01166  | -0.47129 | 0.01254  |
| C | 3.63997  | -0.15982 | -1.18965 |
| C | 4.35916  | 1.01811  | -1.32327 |
| C | 4.45798  | 1.89393  | -0.25020 |
| C | 3.83704  | 1.58784  | 0.95253  |
| C | 3.11493  | 0.40992  | 1.08356  |
| H | -5.97485 | 0.23136  | -1.54130 |
| H | -4.63014 | 0.86693  | 1.21367  |
| H | -3.74623 | -0.47285 | -1.40907 |
| H | -2.22489 | 0.06349  | 1.26410  |
| H | -1.36397 | -1.23883 | -1.37480 |
| H | 2.66569  | -2.54190 | -0.44641 |
| H | 2.11818  | -2.04683 | 1.17492  |
| H | 3.56411  | -0.84745 | -2.02449 |
| H | 4.84636  | 1.25075  | -2.26134 |
| H | 5.02022  | 2.81339  | -0.35127 |
| H | 3.91255  | 2.26903  | 1.79023  |
| H | 2.61243  | 0.17310  | 2.01277  |

**3h**

|   |         |          |          |
|---|---------|----------|----------|
| C | 6.98934 | -0.04461 | -0.27758 |
| C | 5.62458 | 0.49139  | -0.16148 |
| O | 7.96795 | 0.63738  | -0.42665 |



---

|   |          |          |          |
|---|----------|----------|----------|
| C | 4.58186  | -0.32821 | 0.00276  |
| C | 3.21074  | 0.12469  | 0.12773  |
| C | 2.18047  | -0.70437 | 0.29461  |
| C | 0.80425  | -0.16967 | 0.42412  |
| O | -0.07920 | -1.16173 | 0.59167  |
| O | 0.51202  | 0.99650  | 0.39082  |
| C | -1.45022 | -0.77171 | 0.73596  |
| C | -2.09287 | -0.48661 | -0.61514 |
| C | -3.53362 | -0.09438 | -0.42698 |
| C | -4.55373 | -1.03326 | -0.54468 |
| C | -5.87688 | -0.67498 | -0.32608 |
| C | -6.19533 | 0.63063  | 0.01827  |
| C | -5.18461 | 1.57516  | 0.14110  |
| C | -3.86406 | 1.21336  | -0.07916 |
| H | 7.06655  | -1.14803 | -0.21726 |
| H | 5.51018  | 1.56856  | -0.21440 |
| H | 4.75571  | -1.40097 | 0.04900  |
| H | 3.01651  | 1.19215  | 0.08578  |
| H | 2.30407  | -1.77898 | 0.34548  |
| H | -1.50730 | 0.10653  | 1.37931  |
| H | -1.93690 | -1.61286 | 1.22693  |
| H | -2.01748 | -1.37844 | -1.23987 |
| H | -1.54103 | 0.31900  | -1.10148 |
| H | -4.30881 | -2.05381 | -0.81764 |
| H | -6.65937 | -1.41600 | -0.42880 |
| H | -7.22658 | 0.91243  | 0.18683  |
| H | -5.42631 | 2.59692  | 0.40507  |
| H | -3.07500 | 1.95192  | 0.01369  |

**3i**

|   |         |          |          |
|---|---------|----------|----------|
| C | 5.75847 | -0.67152 | 0.00000  |
| C | 4.55304 | 0.17364  | 0.00003  |
| O | 6.87869 | -0.23697 | 0.00005  |
| C | 3.33465 | -0.37479 | -0.00002 |
| C | 2.10772 | 0.39655  | -0.00000 |
| C | 0.89498 | -0.15798 | -0.00005 |

---

|   |          |          |          |
|---|----------|----------|----------|
| C | -0.30820 | 0.69884  | -0.00003 |
| O | -1.43134 | -0.04777 | -0.00007 |
| O | -0.32418 | 1.89804  | -0.00000 |
| C | -2.63457 | 0.69337  | -0.00007 |
| C | -3.76620 | -0.30636 | 0.00002  |
| F | -4.93222 | 0.34660  | -0.00001 |
| F | -3.73638 | -1.09196 | -1.07619 |
| F | -3.73635 | -1.09179 | 1.07635  |
| H | 5.56800  | -1.76267 | -0.00007 |
| H | 4.70414  | 1.24757  | 0.00010  |
| H | 3.24081  | -1.45822 | -0.00009 |
| H | 2.18422  | 1.47970  | 0.00006  |
| H | 0.74364  | -1.22981 | -0.00010 |
| H | -2.71048 | 1.32042  | -0.88892 |
| H | -2.71042 | 1.32051  | 0.88871  |

### 3j

|   |          |          |          |
|---|----------|----------|----------|
| C | -6.18353 | 0.33468  | -0.30968 |
| C | -4.90526 | -0.24045 | 0.13406  |
| O | -7.26009 | -0.11157 | -0.01407 |
| C | -3.74474 | 0.31309  | -0.23087 |
| C | -2.44697 | -0.19282 | 0.16992  |
| C | -1.29832 | 0.38100  | -0.18738 |
| C | -0.00434 | -0.18257 | 0.27009  |
| O | 1.01643  | 0.57053  | -0.15163 |
| O | 0.11184  | -1.17590 | 0.93809  |
| C | 2.34196  | 0.15516  | 0.23072  |
| C | 2.84432  | -0.93425 | -0.70317 |
| C | 4.28884  | -1.29791 | -0.36098 |
| C | 5.19221  | -0.06747 | -0.40225 |
| C | 4.66603  | 1.02705  | 0.52321  |
| C | 3.22191  | 1.38969  | 0.18140  |
| H | -6.09556 | 1.23251  | -0.95282 |
| H | -4.95087 | -1.12207 | 0.76392  |
| H | -3.75772 | 1.19828  | -0.86287 |
| H | -2.41215 | -1.08005 | 0.79478  |

---

|   |          |          |          |
|---|----------|----------|----------|
| H | -1.26424 | 1.26939  | -0.80575 |
| H | 2.28927  | -0.23538 | 1.25065  |
| H | 2.19335  | -1.80636 | -0.63143 |
| H | 2.78952  | -0.55551 | -1.72909 |
| H | 4.65071  | -2.06262 | -1.05004 |
| H | 4.32178  | -1.73672 | 0.64178  |
| H | 5.23133  | 0.31622  | -1.42727 |
| H | 6.21300  | -0.33787 | -0.12570 |
| H | 5.29537  | 1.91648  | 0.46457  |
| H | 4.71369  | 0.67451  | 1.55897  |
| H | 3.17153  | 1.81048  | -0.82786 |
| H | 2.83279  | 2.14293  | 0.86870  |

**3k**

|   |          |          |          |
|---|----------|----------|----------|
| C | -7.31378 | -1.07696 | -0.00002 |
| C | -6.24225 | -0.06959 | 0.00001  |
| O | -8.48646 | -0.81173 | -0.00010 |
| C | -4.95908 | -0.44247 | 0.00007  |
| C | -3.84424 | 0.48381  | 0.00007  |
| C | -2.57132 | 0.08943  | 0.00010  |
| C | -1.47400 | 1.08721  | 0.00000  |
| O | -0.28166 | 0.48327  | 0.00005  |
| O | -1.62437 | 2.27949  | -0.00001 |
| C | 0.86358  | 1.34593  | -0.00009 |
| C | 2.11915  | 0.49717  | -0.00003 |
| C | 2.18080  | -0.39279 | -1.25118 |
| C | 3.47460  | -1.21342 | -1.25294 |
| C | 3.51885  | -2.09466 | 0.00054  |
| C | 3.47505  | -1.21262 | 1.25348  |
| C | 2.18124  | -0.39201 | 1.25165  |
| C | 3.33690  | 1.43498  | -0.00053 |
| C | 4.63416  | 0.61896  | -0.00052 |
| C | 4.67985  | -0.26486 | 1.25119  |
| C | 4.67939  | -0.26565 | -1.25170 |
| H | -6.96668 | -2.12908 | -0.00004 |
| H | -6.54248 | 0.97255  | -0.00002 |

---

|   |          |          |          |
|---|----------|----------|----------|
| H | -4.71954 | -1.50367 | 0.00009  |
| H | -4.05867 | 1.54826  | 0.00002  |
| H | -2.29168 | -0.95700 | 0.00013  |
| H | 0.81893  | 1.98713  | 0.88431  |
| H | 0.81885  | 1.98686  | -0.88468 |
| H | 1.31200  | -1.05570 | -1.27063 |
| H | 2.13342  | 0.23581  | -2.14724 |
| H | 3.50226  | -1.84275 | -2.14563 |
| H | 4.43109  | -2.69833 | 0.00057  |
| H | 2.67088  | -2.78601 | 0.00092  |
| H | 3.50304  | -1.84138 | 2.14656  |
| H | 2.13417  | 0.23715  | 2.14734  |
| H | 1.31246  | -1.05492 | 1.27182  |
| H | 3.30314  | 2.08371  | 0.88136  |
| H | 3.30281  | 2.08318  | -0.88279 |
| H | 5.48845  | 1.29995  | -0.00090 |
| H | 4.66836  | 0.35803  | 2.15047  |
| H | 5.60932  | -0.84131 | 1.26584  |
| H | 5.60885  | -0.84211 | -1.26634 |
| H | 4.66756  | 0.35668  | -2.15137 |

### 3l

|   |          |          |          |
|---|----------|----------|----------|
| C | 7.01605  | 0.38504  | -0.00033 |
| C | 5.71709  | -0.30367 | -0.00024 |
| O | 8.07715  | -0.18040 | -0.00046 |
| C | 4.57657  | 0.39299  | -0.00011 |
| C | 3.25884  | -0.21064 | -0.00002 |
| C | 2.13110  | 0.49912  | 0.00005  |
| C | 0.81231  | -0.18737 | 0.00010  |
| O | -0.17425 | 0.71071  | 0.00005  |
| O | 0.67582  | -1.38273 | 0.00025  |
| C | -1.56718 | 0.30427  | 0.00007  |
| C | -1.92027 | -0.49155 | -1.25661 |
| C | -3.42989 | -0.77465 | -1.25341 |
| C | -4.20733 | 0.54608  | -1.25171 |
| C | -3.84152 | 1.35068  | -0.00011 |

---

|   |          |          |          |
|---|----------|----------|----------|
| C | -2.33471 | 1.62554  | -0.00010 |
| C | -1.92032 | -0.49126 | 1.25691  |
| C | -3.42994 | -0.77434 | 1.25373  |
| C | -4.20738 | 0.54639  | 1.25167  |
| C | -3.78932 | -1.58154 | 0.00025  |
| H | 6.95945  | 1.49164  | -0.00026 |
| H | 5.73214  | -1.38794 | -0.00029 |
| H | 4.62319  | 1.47980  | -0.00008 |
| H | 3.18948  | -1.29418 | -0.00003 |
| H | 2.12961  | 1.58194  | 0.00004  |
| H | -1.35933 | -1.42565 | -1.27403 |
| H | -1.64066 | 0.09287  | -2.13807 |
| H | -3.68302 | -1.35072 | -2.14599 |
| H | -5.28267 | 0.34738  | -1.26723 |
| H | -3.96884 | 1.12245  | -2.15027 |
| H | -4.37972 | 2.30109  | -0.00023 |
| H | -2.04647 | 2.20254  | -0.88286 |
| H | -2.04652 | 2.20272  | 0.88255  |
| H | -1.64074 | 0.09335  | 2.13825  |
| H | -1.35941 | -1.42536 | 1.27456  |
| H | -3.68311 | -1.35020 | 2.14644  |
| H | -5.28273 | 0.34769  | 1.26720  |
| H | -3.96893 | 1.12298  | 2.15011  |
| H | -3.24786 | -2.53140 | 0.00037  |
| H | -4.85836 | -1.81209 | 0.00025  |

**3m**

|   |          |          |          |
|---|----------|----------|----------|
| H | 6.74196  | 1.72791  | -0.08133 |
| C | 6.92394  | 0.64409  | 0.06035  |
| O | 8.04063  | 0.21376  | 0.17581  |
| C | 5.71347  | -0.19008 | 0.09243  |
| C | 4.50438  | 0.36110  | -0.04808 |
| C | 3.26342  | -0.38775 | -0.03375 |
| C | 2.07014  | 0.18171  | -0.19909 |
| C | 0.83381  | -0.63893 | -0.19237 |
| O | -0.23611 | 0.12309  | -0.44048 |

---

|           |          |          |          |
|-----------|----------|----------|----------|
| O         | 0.79831  | -1.82557 | -0.00219 |
| C         | -2.43688 | 0.34767  | -1.34064 |
| C         | -3.78958 | -0.36301 | -1.47272 |
| C         | -4.40166 | -0.56932 | -0.08234 |
| C         | -4.59556 | 0.79172  | 0.59698  |
| C         | -2.63152 | 1.70663  | -0.65733 |
| C         | -3.24361 | 1.50149  | 0.73349  |
| C         | -1.51801 | -0.53272 | -0.49880 |
| C         | -2.09869 | -0.72324 | 0.90369  |
| C         | -2.29670 | 0.63994  | 1.57731  |
| C         | -3.45302 | -1.43066 | 0.75959  |
| H         | 5.85129  | -1.25678 | 0.23146  |
| H         | 4.42967  | 1.43763  | -0.18632 |
| H         | 3.31111  | -1.46262 | 0.11249  |
| H         | 1.95599  | 1.24753  | -0.35466 |
| H         | -1.98457 | 0.48332  | -2.32590 |
| H         | -3.66242 | -1.32766 | -1.97271 |
| H         | -4.45665 | 0.24028  | -2.09425 |
| H         | -5.36585 | -1.07374 | -0.17906 |
| H         | -5.04730 | 0.65447  | 1.58388  |
| H         | -5.28165 | 1.40731  | 0.00750  |
| H         | -3.28909 | 2.32928  | -1.27042 |
| H         | -1.67351 | 2.22436  | -0.57473 |
| H         | -3.38518 | 2.47099  | 1.21672  |
| H         | -1.37182 | -1.50555 | -0.97343 |
| H         | -1.41340 | -1.34290 | 1.48537  |
| H         | -1.33493 | 1.14457  | 1.69674  |
| H         | -2.71275 | 0.49153  | 2.57772  |
| H         | -3.31746 | -2.41008 | 0.29182  |
| H         | -3.87959 | -1.60196 | 1.75161  |
| <b>3n</b> |          |          |          |
| C         | -5.76743 | 0.46440  | -0.49390 |
| C         | -4.47963 | 0.38826  | 0.21266  |
| O         | -6.77196 | 0.91552  | -0.01158 |
| C         | -3.40257 | -0.12842 | -0.38645 |

---

|   |          |          |          |
|---|----------|----------|----------|
| C | -2.10283 | -0.23702 | 0.24541  |
| C | -1.03548 | -0.75531 | -0.36187 |
| C | 0.26182  | -0.83226 | 0.34952  |
| O | 1.20036  | -1.39244 | -0.42673 |
| O | 0.45721  | -0.45333 | 1.47346  |
| C | 2.51266  | -1.48618 | 0.15615  |
| C | 3.25040  | -0.20285 | 0.08183  |
| C | 3.37022  | 0.84765  | 0.92830  |
| C | 4.20817  | 1.79918  | 0.26832  |
| C | 4.52655  | 1.24786  | -0.92556 |
| O | 3.95413  | 0.03281  | -1.05578 |
| H | -5.75848 | 0.06930  | -1.52891 |
| H | -4.44998 | 0.76592  | 1.22878  |
| H | -3.49003 | -0.49352 | -1.40727 |
| H | -1.99619 | 0.12338  | 1.26402  |
| H | -1.07052 | -1.13101 | -1.37672 |
| H | 3.02263  | -2.24927 | -0.42716 |
| H | 2.41817  | -1.80348 | 1.19266  |
| H | 2.89757  | 0.92904  | 1.89250  |
| H | 4.52895  | 2.75908  | 0.63464  |
| H | 5.12860  | 1.57829  | -1.75392 |

### 3o

|   |          |          |          |
|---|----------|----------|----------|
| C | -5.35485 | -0.65888 | -0.18459 |
| C | -4.15053 | 0.15350  | 0.04639  |
| O | -6.47657 | -0.25393 | -0.03341 |
| C | -2.93288 | -0.36352 | -0.14196 |
| C | -1.70233 | 0.37393  | 0.06447  |
| C | -0.49303 | -0.15414 | -0.12223 |
| C | 0.72126  | 0.66409  | 0.10847  |
| O | 1.83119  | -0.04915 | -0.11813 |
| O | 0.72482  | 1.81565  | 0.45200  |
| C | 3.06851  | 0.65565  | 0.07151  |
| C | 4.19280  | -0.31976 | -0.09790 |
| C | 4.16022  | -1.52154 | 0.79778  |

---

|   |          |          |          |
|---|----------|----------|----------|
| C | 5.16153  | -0.08351 | -0.97216 |
| H | -5.16309 | -1.69847 | -0.51618 |
| H | -4.29996 | 1.17702  | 0.37227  |
| H | -2.84301 | -1.39676 | -0.46992 |
| H | -1.77168 | 1.40828  | 0.38762  |
| H | -0.35090 | -1.17835 | -0.44385 |
| H | 3.06523  | 1.08413  | 1.07760  |
| H | 3.12738  | 1.47385  | -0.64642 |
| H | 4.12739  | -1.21680 | 1.84716  |
| H | 3.26305  | -2.11316 | 0.60801  |
| H | 5.03457  | -2.15127 | 0.64407  |
| H | 6.00369  | -0.75655 | -1.07405 |
| H | 5.14771  | 0.79263  | -1.60866 |

### 3p

|   |          |          |          |
|---|----------|----------|----------|
| C | 6.00604  | 0.33644  | -0.45711 |
| C | 4.66467  | -0.24590 | -0.30517 |
| O | 6.97361  | -0.28777 | -0.80369 |
| C | 3.63289  | 0.50784  | 0.08593  |
| C | 2.28349  | 0.00533  | 0.25791  |
| C | 1.26954  | 0.77836  | 0.64868  |
| C | -0.11997 | 0.29697  | 0.82860  |
| O | -0.25061 | -1.01669 | 0.59828  |
| O | -1.02341 | 1.01917  | 1.15501  |
| C | -1.58619 | -1.54496 | 0.68492  |
| C | -2.35799 | -1.25381 | -0.56877 |
| C | -3.43085 | -0.51331 | -0.57242 |
| C | -4.48840 | 0.24548  | -0.53971 |
| C | -5.87120 | -0.31773 | -0.34822 |
| C | -4.37807 | 1.73968  | -0.69115 |
| H | 6.07707  | 1.41769  | -0.22662 |
| H | 4.55821  | -1.30285 | -0.52361 |
| H | 3.79816  | 1.56308  | 0.29174  |
| H | 2.10673  | -1.04527 | 0.05539  |
| H | 1.40340  | 1.83255  | 0.85891  |
| H | -2.08877 | -1.12043 | 1.55188  |



---

|   |          |          |          |
|---|----------|----------|----------|
| H | -1.43921 | -2.61502 | 0.82378  |
| H | -1.97272 | -1.67272 | -1.49387 |
| H | -6.50516 | -0.04975 | -1.19691 |
| H | -5.85585 | -1.40091 | -0.25054 |
| H | -6.32825 | 0.11100  | 0.54681  |
| H | -3.34051 | 2.05665  | -0.76459 |
| H | -4.92045 | 2.06894  | -1.58099 |
| H | -4.83314 | 2.23308  | 0.17079  |

### 3q

|   |          |          |          |
|---|----------|----------|----------|
| H | 3.91710  | -2.02141 | 0.00003  |
| C | 4.18531  | -0.94758 | 0.00003  |
| O | 5.33526  | -0.59579 | 0.00003  |
| C | 3.04043  | -0.00778 | 0.00002  |
| C | 1.81528  | -0.55688 | 0.00001  |
| C | 0.55589  | 0.15802  | 0.00000  |
| C | -0.62819 | -0.45664 | -0.00000 |
| C | -1.87778 | 0.33891  | -0.00001 |
| O | -2.95577 | -0.45461 | -0.00002 |
| O | -1.93349 | 1.54024  | -0.00001 |
| C | -4.22147 | 0.22008  | -0.00002 |
| C | -5.30098 | -0.83327 | -0.00002 |
| C | 3.38345  | 1.44476  | 0.00001  |
| H | 1.74743  | -1.64238 | 0.00002  |
| H | 0.55799  | 1.24206  | 0.00000  |
| H | -0.72386 | -1.53527 | -0.00000 |
| H | -4.27237 | 0.86232  | -0.88043 |
| H | -4.27237 | 0.86233  | 0.88038  |
| H | -5.22462 | -1.46472 | 0.88477  |
| H | -5.22462 | -1.46474 | -0.88479 |
| H | -6.28064 | -0.35546 | -0.00002 |
| H | 3.99533  | 1.67818  | -0.87291 |
| H | 2.50573  | 2.08452  | 0.00001  |
| H | 3.99533  | 1.67819  | 0.87293  |

### 3r

---

|   |          |          |          |
|---|----------|----------|----------|
| C | 4.17350  | -0.28475 | -0.00000 |
| C | 2.86243  | 0.42551  | -0.00001 |
| O | 4.24146  | -1.49003 | 0.00002  |
| C | 1.71192  | -0.25093 | 0.00001  |
| C | 0.41102  | 0.38680  | 0.00001  |
| C | -0.73709 | -0.29102 | 0.00002  |
| C | -2.02965 | 0.43312  | 0.00001  |
| O | -3.06099 | -0.42006 | 0.00002  |
| O | -2.15348 | 1.62941  | -0.00001 |
| C | -4.36322 | 0.18028  | -0.00000 |
| C | -5.37903 | -0.93488 | -0.00002 |
| C | 5.40036  | 0.58944  | -0.00003 |
| H | 2.86930  | 1.51057  | -0.00003 |
| H | 1.75489  | -1.33642 | 0.00003  |
| H | 0.36842  | 1.47204  | -0.00001 |
| H | -0.76966 | -1.37318 | 0.00004  |
| H | -4.45155 | 0.81858  | -0.88049 |
| H | -4.45158 | 0.81858  | 0.88049  |
| H | -6.38552 | -0.51663 | -0.00005 |
| H | -5.26440 | -1.56069 | -0.88469 |
| H | -5.26444 | -1.56069 | 0.88465  |
| H | 5.39037  | 1.23834  | -0.87860 |
| H | 5.39039  | 1.23837  | 0.87852  |
| H | 6.29629  | -0.02481 | -0.00003 |

**3s**

|   |          |          |          |
|---|----------|----------|----------|
| C | 7.05482  | -0.42866 | -0.09362 |
| C | 5.75559  | 0.13638  | 0.30310  |
| O | 8.11225  | -0.03038 | 0.31654  |
| C | 4.61751  | -0.35536 | -0.19507 |
| C | 3.30318  | 0.15091  | 0.14618  |
| C | 2.17457  | -0.34170 | -0.36429 |
| C | 0.86861  | 0.23216  | 0.03367  |
| O | -0.13089 | -0.40832 | -0.61830 |
| O | 0.71189  | 1.12618  | 0.81273  |
| C | -1.45278 | -0.03345 | -0.40122 |

---

|   |          |          |          |
|---|----------|----------|----------|
| C | -2.33673 | -1.07651 | -0.11838 |
| C | -3.65268 | -0.72338 | 0.03476  |
| C | -4.08216 | 0.58899  | -0.08748 |
| C | -3.21279 | 1.61041  | -0.37171 |
| C | -1.86321 | 1.27885  | -0.53009 |
| O | -5.44031 | 0.63377  | 0.07101  |
| C | -5.79843 | -0.64556 | 0.57324  |
| O | -4.72530 | -1.53190 | 0.27524  |
| H | 7.00110  | -1.26796 | -0.81469 |
| H | 5.77007  | 0.96051  | 1.00793  |
| H | 4.66319  | -1.18295 | -0.89940 |
| H | 3.23772  | 0.97354  | 0.85192  |
| H | 2.16617  | -1.15962 | -1.07357 |
| H | -1.98956 | -2.09586 | -0.03454 |
| H | -3.55690 | 2.62982  | -0.47052 |
| H | -1.13565 | 2.04906  | -0.73676 |
| H | -6.70272 | -0.99160 | 0.07780  |
| H | -5.92741 | -0.58816 | 1.65945  |

#### 7.4 Cartesian coordinates of the TS with the model catalyst

##### TS 3b

|   |          |          |          |
|---|----------|----------|----------|
| C | -1.76989 | -0.79241 | 0.17039  |
| C | -0.41417 | -0.43678 | -0.38820 |
| C | 0.69505  | -0.74342 | 0.42912  |
| C | 1.99828  | -0.81000 | -0.03667 |
| C | 3.09534  | -1.26246 | 0.73696  |
| C | 4.36288  | -1.38237 | 0.24138  |
| O | -2.64425 | -1.01093 | -0.81325 |
| O | -1.99614 | -0.85385 | 1.36216  |
| C | -4.00375 | -1.39507 | -0.42222 |
| C | -4.86331 | -0.17125 | -0.16242 |
| O | 4.66638  | -1.03669 | -1.00974 |

---

|   |          |          |          |
|---|----------|----------|----------|
| C | -0.23978 | 1.97533  | 1.10032  |
| C | -0.75293 | 1.67932  | -0.29066 |
| C | 0.22786  | 2.11114  | -1.19210 |
| C | 1.43362  | 2.39037  | -0.49614 |
| C | 1.20883  | 2.23907  | 0.85310  |
| H | -0.31968 | -0.50802 | -1.46568 |
| H | 0.48793  | -0.97704 | 1.47023  |
| H | 2.19408  | -0.55548 | -1.07635 |
| H | 2.93752  | -1.56116 | 1.76800  |
| H | 5.16867  | -1.76877 | 0.86214  |
| H | -4.49590 | 0.39052  | 0.70023  |
| H | -4.89260 | 0.48346  | -1.03806 |
| H | 5.59664  | -1.21398 | -1.20934 |
| H | -0.46939 | 1.22675  | 1.86197  |
| H | -0.70761 | 2.91343  | 1.44394  |
| H | -1.80750 | 1.66010  | -0.54000 |
| H | 0.10005  | 2.17412  | -2.26743 |
| H | 2.37307  | 2.66877  | -0.95766 |
| H | 1.94462  | 2.37050  | 1.63804  |
| H | -3.93599 | -2.03708 | 0.45777  |
| H | -4.36266 | -1.97405 | -1.27399 |
| H | -5.88735 | -0.48918 | 0.05579  |

**TS 3c**

|   |          |          |          |
|---|----------|----------|----------|
| C | -2.12163 | -0.81191 | 0.13125  |
| C | -0.76431 | -0.44415 | -0.41079 |
| C | 0.33790  | -0.74623 | 0.41812  |
| C | 1.64663  | -0.80250 | -0.03359 |
| C | 2.73798  | -1.25057 | 0.75025  |
| C | 4.01156  | -1.36115 | 0.26761  |
| O | -2.99365 | -1.01228 | -0.86062 |
| O | -2.36636 | -0.89369 | 1.31695  |
| C | -4.33153 | -1.40019 | -0.45664 |
| O | 4.32591  | -1.00971 | -0.97895 |
| C | -0.62979 | 1.96226  | 1.08784  |
| C | -1.12063 | 1.66672  | -0.31147 |

---

|   |          |          |          |
|---|----------|----------|----------|
| C | -0.13057 | 2.11109  | -1.19730 |
| C | 1.06277  | 2.39648  | -0.48343 |
| C | 0.82013  | 2.23738  | 0.86213  |
| H | -0.65738 | -0.51208 | -1.48735 |
| H | 0.12089  | -0.98584 | 1.45584  |
| H | 1.85199  | -0.54288 | -1.07017 |
| H | 2.57115  | -1.55374 | 1.77856  |
| H | 4.81305  | -1.74471 | 0.89566  |
| H | 5.25934  | -1.18037 | -1.16955 |
| H | -0.86436 | 1.21055  | 1.84488  |
| H | -1.10936 | 2.89614  | 1.42675  |
| H | -2.17130 | 1.64279  | -0.57667 |
| H | -0.24421 | 2.17857  | -2.27394 |
| H | 2.00633  | 2.68464  | -0.93031 |
| H | 1.54385  | 2.37079  | 1.65789  |
| H | -4.29720 | -2.34813 | 0.08289  |
| H | -4.89334 | -1.50093 | -1.38291 |
| H | -4.76769 | -0.63277 | 0.18545  |

**TS 3d**

|   |          |          |          |
|---|----------|----------|----------|
| C | 1.31324  | -0.29474 | -0.35822 |
| C | -0.05725 | -0.19531 | 0.27732  |
| C | -1.14647 | -0.62300 | -0.50989 |
| C | -2.39712 | -0.92298 | 0.00679  |
| C | -3.45209 | -1.49410 | -0.74795 |
| C | -4.65726 | -1.84364 | -0.20795 |
| O | 2.24304  | -0.42828 | 0.58066  |
| O | 1.46544  | -0.24169 | -1.56371 |
| C | 3.69901  | -0.59300 | 0.24648  |
| C | 4.19482  | 0.66389  | -0.47000 |
| C | 3.88268  | -1.86235 | -0.58631 |
| C | 4.33293  | -0.73537 | 1.62900  |
| O | -4.94449 | -1.62894 | 1.07737  |
| C | -0.70597 | 2.25190  | -1.04220 |
| C | -0.06046 | 1.96559  | 0.29512  |
| C | -1.03440 | 2.17494  | 1.27709  |

---

|   |          |          |          |
|---|----------|----------|----------|
| C | -2.31466 | 2.29447  | 0.67031  |
| C | -2.15968 | 2.26397  | -0.69586 |
| H | -0.08837 | -0.33525 | 1.35201  |
| H | -0.96213 | -0.75724 | -1.57303 |
| H | -2.57260 | -0.76891 | 1.06990  |
| H | -3.30542 | -1.69860 | -1.80393 |
| H | -5.42709 | -2.31295 | -0.81755 |
| H | 4.01148  | 1.55622  | 0.13915  |
| H | 5.27625  | 0.58464  | -0.62298 |
| H | 3.71983  | 0.78635  | -1.44523 |
| H | 3.42311  | -1.76994 | -1.57203 |
| H | 4.95334  | -2.04789 | -0.72135 |
| H | 3.45468  | -2.72765 | -0.06941 |
| H | 4.14550  | 0.15372  | 2.23936  |
| H | 3.93467  | -1.60935 | 2.15342  |
| H | 5.41537  | -0.85925 | 1.52669  |
| H | -5.82760 | -1.96525 | 1.30109  |
| H | -0.41386 | 1.59060  | -1.86192 |
| H | -0.41359 | 3.26982  | -1.35349 |
| H | 0.99960  | 2.09668  | 0.48057  |
| H | -0.84783 | 2.19351  | 2.34610  |
| H | -3.25363 | 2.38759  | 1.20353  |
| H | -2.95764 | 2.32279  | -1.42779 |

**TS 3e**

|   |          |          |          |
|---|----------|----------|----------|
| H | -7.07419 | -1.72730 | -1.94451 |
| C | -7.39177 | -1.17913 | -1.06060 |
| C | -6.50484 | -0.47777 | -0.29041 |
| O | -8.69402 | -1.29087 | -0.86650 |
| C | -5.13540 | -0.42025 | -0.63811 |
| C | -4.17938 | 0.32124  | 0.03724  |
| C | -2.85441 | 0.49267  | -0.42084 |
| C | -2.09920 | 1.66176  | 0.16514  |
| O | -1.18333 | 2.10824  | -0.69412 |
| C | -0.38156 | 3.26593  | -0.27970 |
| O | -2.32704 | 2.10156  | 1.27427  |

---

|   |          |          |          |
|---|----------|----------|----------|
| C | 0.89003  | 2.83484  | 0.43811  |
| C | 1.84754  | 1.99220  | -0.41400 |
| C | 3.12428  | 1.59115  | 0.33547  |
| C | 4.08648  | 0.74460  | -0.50666 |
| C | 5.36550  | 0.34738  | 0.24094  |
| C | 6.32784  | -0.50027 | -0.59989 |
| C | 7.60889  | -0.89365 | 0.14580  |
| C | 8.57266  | -1.74006 | -0.69483 |
| C | 9.85039  | -2.12553 | 0.05629  |
| C | -2.33697 | -1.15755 | 1.82133  |
| C | -3.31980 | -2.23314 | 1.49724  |
| C | -3.00421 | -2.80674 | 0.28693  |
| C | -1.92660 | -2.08504 | -0.29119 |
| C | -1.61610 | -0.97454 | 0.50449  |
| H | -6.85550 | 0.06596  | 0.58480  |
| H | -4.82770 | -0.95956 | -1.53392 |
| H | -4.46002 | 0.85693  | 0.94010  |
| H | -2.61208 | 0.25260  | -1.44999 |
| H | -1.00562 | 3.90036  | 0.35170  |
| H | -0.16352 | 3.77689  | -1.21956 |
| H | 0.61788  | 2.30320  | 1.35872  |
| H | 1.39512  | 3.75477  | 0.76083  |
| H | 2.11621  | 2.55545  | -1.31823 |
| H | 1.33079  | 1.08886  | -0.76713 |
| H | 2.85386  | 1.03814  | 1.24669  |
| H | 3.64150  | 2.49814  | 0.67719  |
| H | 4.35500  | 1.29931  | -1.41652 |
| H | 3.56862  | -0.16351 | -0.84872 |
| H | 5.09682  | -0.20456 | 1.15311  |
| H | 5.88276  | 1.25592  | 0.57941  |
| H | 6.59431  | 0.05210  | -1.51210 |
| H | 5.81067  | -1.40996 | -0.93781 |
| H | 7.34364  | -1.44612 | 1.05875  |
| H | 8.12593  | 0.01586  | 0.48312  |
| H | 8.83671  | -1.18760 | -1.60675 |
| H | 8.05620  | -2.64962 | -1.03086 |

---

|   |          |          |          |
|---|----------|----------|----------|
| H | 10.51780 | -2.72435 | -0.57128 |
| H | 10.40493 | -1.23646 | 0.37679  |
| H | 9.62243  | -2.71264 | 0.95315  |
| H | -1.61417 | -1.55955 | 2.55135  |
| H | -2.74622 | -0.24984 | 2.27053  |
| H | -4.10906 | -2.55620 | 2.16630  |
| H | -3.49348 | -3.66502 | -0.15721 |
| H | -1.44777 | -2.32842 | -1.23364 |
| H | -0.67641 | -0.44129 | 0.41667  |
| H | -8.99047 | -0.79248 | -0.08685 |

**TS 3f**

|   |          |          |          |
|---|----------|----------|----------|
| C | -0.73913 | -0.46036 | -0.87180 |
| C | 0.45706  | -0.07364 | -0.03719 |
| C | 1.58071  | 0.40570  | -0.74451 |
| C | 2.61444  | 1.11566  | -0.15620 |
| C | 3.66791  | 1.72858  | -0.87844 |
| C | 4.64346  | 2.48058  | -0.28765 |
| O | -1.86447 | -0.36768 | -0.16464 |
| O | -0.64853 | -0.81948 | -2.02849 |
| C | -3.10825 | -0.69884 | -0.86871 |
| O | 4.69531  | 2.65731  | 1.03283  |
| C | 1.79602  | -2.53324 | -0.51948 |
| C | 0.86521  | -2.08535 | 0.58481  |
| C | 1.65698  | -1.82301 | 1.70952  |
| C | 3.02711  | -1.78762 | 1.33790  |
| C | 3.13177  | -2.12430 | 0.00783  |
| H | 0.23306  | 0.32758  | 0.94464  |
| H | 1.59339  | 0.23395  | -1.81768 |
| H | 2.59677  | 1.26691  | 0.92134  |
| H | 3.70412  | 1.63240  | -1.95853 |
| H | 5.41374  | 2.96238  | -0.88637 |
| H | 5.42690  | 3.23956  | 1.28249  |
| H | 1.54792  | -2.18233 | -1.52372 |
| H | 1.76515  | -3.63496 | -0.56575 |
| H | -0.16445 | -2.41498 | 0.66023  |



---

|   |          |          |          |
|---|----------|----------|----------|
| H | 1.27629  | -1.62687 | 2.70611  |
| H | 3.84814  | -1.53052 | 1.99583  |
| H | 4.05062  | -2.16974 | -0.56529 |
| H | -3.16739 | -0.06614 | -1.75723 |
| C | -4.26200 | -0.48734 | 0.09493  |
| H | -3.03633 | -1.73850 | -1.20076 |
| C | -4.48173 | 0.96223  | 0.57488  |
| H | -5.16839 | -0.84598 | -0.41160 |
| H | -4.11508 | -1.14387 | 0.96157  |
| C | -5.55780 | 0.99224  | 1.66971  |
| H | -3.53887 | 1.31163  | 1.01837  |
| C | -4.85058 | 1.91051  | -0.57580 |
| H | -4.07127 | 1.96405  | -1.34328 |
| H | -5.77928 | 1.59194  | -1.06378 |
| H | -5.00697 | 2.92730  | -0.20265 |
| H | -5.29137 | 0.34767  | 2.51426  |
| H | -5.69868 | 2.00692  | 2.05463  |
| H | -6.52376 | 0.64947  | 1.28068  |

**TS 3g**

|   |          |          |          |
|---|----------|----------|----------|
| C | -0.34599 | -1.29863 | 0.11642  |
| C | 0.92617  | -0.69048 | -0.41859 |
| C | 2.06561  | -0.78268 | 0.41129  |
| C | 3.36063  | -0.59232 | -0.03886 |
| C | 4.51721  | -0.82443 | 0.74694  |
| C | 5.78873  | -0.69425 | 0.26619  |
| O | -1.18056 | -1.59647 | -0.88000 |
| O | -0.55275 | -1.45443 | 1.30339  |
| O | 6.03393  | -0.29317 | -0.98205 |
| C | 0.59052  | 1.68881  | 1.09272  |
| C | 0.16340  | 1.30113  | -0.30550 |
| C | 1.04495  | 1.93315  | -1.19271 |
| C | 2.15857  | 2.45249  | -0.48155 |
| C | 1.95485  | 2.25033  | 0.86417  |
| H | 1.04561  | -0.73175 | -1.49525 |
| H | 1.89489  | -1.06127 | 1.44786  |

---

|   |          |          |          |
|---|----------|----------|----------|
| H | 3.51525  | -0.30044 | -1.07576 |
| H | 4.40898  | -1.15076 | 1.77598  |
| H | 6.64735  | -0.91767 | 0.89605  |
| H | 6.98321  | -0.28605 | -1.16969 |
| H | 0.51498  | 0.90439  | 1.84915  |
| H | -0.06815 | 2.50480  | 1.43488  |
| H | -0.86446 | 1.07226  | -0.56500 |
| H | 0.91834  | 1.97554  | -2.26920 |
| H | 3.02493  | 2.92242  | -0.93061 |
| H | 2.63895  | 2.52682  | 1.65819  |
| C | -2.52340 | -2.07784 | -0.50211 |
| H | -2.41939 | -2.72962 | 0.36568  |
| H | -2.83113 | -2.65951 | -1.37130 |
| C | -5.15803 | 1.24587  | 0.24310  |
| C | -4.58171 | 0.56014  | 1.31385  |
| C | -3.72630 | -0.51634 | 1.07626  |
| C | -3.44709 | -0.92061 | -0.23662 |
| C | -4.03088 | -0.22660 | -1.30677 |
| C | -4.88059 | 0.85272  | -1.06857 |
| H | -5.82942 | 2.07858  | 0.42929  |
| H | -4.80427 | 0.85788  | 2.33396  |
| H | -3.27425 | -1.04989 | 1.90669  |
| H | -3.82953 | -0.54317 | -2.32711 |
| H | -5.33682 | 1.37721  | -1.90247 |

**TS 3h**

|   |          |          |          |
|---|----------|----------|----------|
| C | -0.22574 | -1.59227 | 0.30910  |
| C | 0.95869  | -0.89903 | -0.31188 |
| C | 2.13591  | -0.85821 | 0.46278  |
| C | 3.38463  | -0.54795 | -0.05105 |
| C | 4.59227  | -0.64557 | 0.68396  |
| C | 5.82116  | -0.39550 | 0.14333  |
| O | -1.05317 | -2.05094 | -0.63517 |
| O | -0.37243 | -1.69007 | 1.51050  |
| O | 5.96813  | 0.00470  | -1.12061 |
| C | 0.48760  | 1.51142  | 1.14519  |

---

|   |          |          |          |
|---|----------|----------|----------|
| C | 0.03035  | 1.06204  | -0.22256 |
| C | 0.83265  | 1.71939  | -1.16125 |
| C | 1.93324  | 2.33900  | -0.51027 |
| C | 1.79635  | 2.16502  | 0.84773  |
| H | 1.02583  | -0.95693 | -1.39193 |
| H | 2.04150  | -1.12125 | 1.51306  |
| H | 3.46170  | -0.26544 | -1.09896 |
| H | 4.56371  | -0.96010 | 1.72197  |
| H | 6.72533  | -0.51777 | 0.73613  |
| H | 6.90238  | 0.10518  | -1.35177 |
| H | 0.49943  | 0.74143  | 1.92020  |
| H | -0.22031 | 2.28141  | 1.49519  |
| H | -0.98497 | 0.74525  | -0.43282 |
| H | 0.66238  | 1.71968  | -2.23251 |
| H | 2.74509  | 2.85620  | -1.00692 |
| H | 2.48806  | 2.51539  | 1.60514  |
| C | -2.28999 | -2.69636 | -0.20417 |
| H | -2.30278 | -2.72067 | 0.88560  |
| H | -2.24468 | -3.71844 | -0.58739 |
| C | -3.48106 | -1.94210 | -0.79002 |
| H | -4.38289 | -2.47892 | -0.46715 |
| H | -3.45125 | -2.01543 | -1.88174 |
| C | -3.73089 | 2.22878  | 0.36521  |
| C | -3.65971 | 1.87332  | -0.98258 |
| C | -3.57220 | 0.52718  | -1.34760 |
| C | -3.56042 | -0.48401 | -0.37708 |
| C | -3.63573 | -0.11313 | 0.97430  |
| C | -3.71914 | 1.23013  | 1.34271  |
| H | -3.81276 | 3.27298  | 0.65168  |
| H | -3.68390 | 2.64018  | -1.75127 |
| H | -3.52835 | 0.25668  | -2.39958 |
| H | -3.64009 | -0.87744 | 1.74684  |
| H | -3.79143 | 1.49559  | 2.39334  |

**TS 3i**

|   |          |          |         |
|---|----------|----------|---------|
| C | -0.84609 | -0.98531 | 0.37551 |
|---|----------|----------|---------|

---

|   |          |          |          |
|---|----------|----------|----------|
| C | 0.43920  | -0.53189 | -0.25716 |
| C | 1.62246  | -0.79219 | 0.47095  |
| C | 2.88934  | -0.77270 | -0.08901 |
| C | 4.06436  | -1.17260 | 0.59410  |
| C | 5.29681  | -1.21083 | 0.00539  |
| O | -1.78736 | -1.18891 | -0.57142 |
| O | -0.99969 | -1.12558 | 1.56703  |
| O | 5.48677  | -0.82856 | -1.25704 |
| C | 0.60505  | 1.83990  | 1.28150  |
| C | -0.03439 | 1.53243  | -0.05406 |
| C | 0.81752  | 2.05073  | -1.04261 |
| C | 2.06937  | 2.39202  | -0.47159 |
| C | 2.00095  | 2.19521  | 0.89029  |
| H | 0.46089  | -0.57570 | -1.33999 |
| H | 1.50768  | -1.06079 | 1.51789  |
| H | 2.99387  | -0.49144 | -1.13500 |
| H | 4.00040  | -1.49569 | 1.62787  |
| H | 6.16671  | -1.55931 | 0.55836  |
| H | 6.40815  | -0.94844 | -1.52812 |
| H | 0.50131  | 1.07314  | 2.05181  |
| H | 0.12000  | 2.74456  | 1.68586  |
| H | -1.10863 | 1.46382  | -0.18321 |
| H | 0.56958  | 2.13011  | -2.09570 |
| H | 2.93432  | 2.74263  | -1.02114 |
| H | 2.80768  | 2.35734  | 1.59587  |
| C | -3.12123 | -1.46703 | -0.11471 |
| C | -3.94946 | -0.19857 | -0.25518 |
| F | -4.05696 | 0.18615  | -1.53655 |
| F | -5.17590 | -0.39708 | 0.24188  |
| H | -3.11428 | -1.78778 | 0.92726  |
| H | -3.53240 | -2.24387 | -0.75951 |
| F | -3.37119 | 0.82434  | 0.42674  |

**TS 3j**

|   |          |          |          |
|---|----------|----------|----------|
| C | -0.57758 | -0.29590 | 0.48058  |
| C | 0.76709  | -0.27105 | -0.20690 |

---

|   |          |          |          |
|---|----------|----------|----------|
| C | 1.88236  | -0.60050 | 0.59303  |
| C | 3.11947  | -0.95360 | 0.08011  |
| C | 4.19835  | -1.43035 | 0.86528  |
| C | 5.39170  | -1.83046 | 0.33468  |
| O | -1.55166 | -0.52904 | -0.39617 |
| O | -0.70309 | -0.11073 | 1.67549  |
| O | 5.64168  | -1.75905 | -0.97328 |
| C | 1.39384  | 2.31107  | 0.79946  |
| C | 0.74828  | 1.85635  | -0.49003 |
| C | 1.71529  | 1.96630  | -1.49618 |
| C | 2.99410  | 2.17893  | -0.91578 |
| C | 2.84433  | 2.30731  | 0.44579  |
| H | 0.76233  | -0.54388 | -1.25606 |
| H | 1.72694  | -0.61086 | 1.66875  |
| H | 3.26676  | -0.91978 | -0.99763 |
| H | 4.08194  | -1.51609 | 1.94057  |
| H | 6.18064  | -2.22334 | 0.97272  |
| H | 6.51805  | -2.11097 | -1.18441 |
| H | 1.11549  | 1.74889  | 1.69403  |
| H | 1.08593  | 3.35359  | 0.98701  |
| H | -0.31331 | 1.95252  | -0.68630 |
| H | 1.52356  | 1.85595  | -2.55809 |
| H | 3.92918  | 2.22490  | -1.46040 |
| H | 3.64389  | 2.46363  | 1.16070  |
| H | -2.88110 | -1.00875 | 1.12637  |
| C | -5.18779 | -1.57952 | -0.40868 |
| C | -3.70425 | -1.52351 | -0.81571 |
| C | -2.93581 | -0.59369 | 0.11578  |
| C | -3.52948 | 0.81321  | 0.16051  |
| C | -5.01384 | 0.75586  | 0.56646  |
| C | -5.81260 | -0.17750 | -0.35495 |
| H | -5.27623 | -2.05712 | 0.57654  |
| H | -5.73303 | -2.21756 | -1.11158 |
| H | -3.61326 | -1.14716 | -1.84281 |
| H | -3.25591 | -2.52259 | -0.79618 |
| H | -2.96249 | 1.43312  | 0.86340  |

---

|   |          |          |          |
|---|----------|----------|----------|
| H | -3.43718 | 1.26282  | -0.83739 |
| H | -5.09196 | 0.40276  | 1.60346  |
| H | -5.43426 | 1.76679  | 0.55115  |
| H | -5.84059 | 0.24738  | -1.36771 |
| H | -6.85163 | -0.24151 | -0.01502 |

**TS 3k**

|   |          |          |          |
|---|----------|----------|----------|
| C | -0.52470 | -0.95308 | -0.42212 |
| C | -1.75382 | -0.37358 | 0.23526  |
| C | -2.58083 | 0.42729  | -0.58143 |
| C | -3.53432 | 1.30054  | -0.08457 |
| C | -4.26292 | 2.21909  | -0.88026 |
| C | -5.15119 | 3.11837  | -0.36257 |
| O | 0.43061  | -1.16450 | 0.48335  |
| O | -0.47198 | -1.19351 | -1.61150 |
| O | -5.42849 | 3.16569  | 0.94096  |
| C | -3.46692 | -2.38084 | -0.82195 |
| C | -2.70632 | -2.28412 | 0.48113  |
| C | -3.63288 | -1.94990 | 1.47574  |
| C | -4.85766 | -1.54850 | 0.87907  |
| C | -4.76080 | -1.71770 | -0.48287 |
| H | -1.65325 | -0.13602 | 1.28808  |
| H | -2.41489 | 0.37092  | -1.65410 |
| H | -3.70235 | 1.33219  | 0.99010  |
| H | -4.10062 | 2.24608  | -1.95270 |
| H | -5.66244 | 3.83003  | -1.00761 |
| H | -6.05182 | 3.87773  | 1.14326  |
| H | -3.66625 | -3.44702 | -1.02303 |
| H | -2.94754 | -2.00043 | -1.70456 |
| H | -1.80872 | -2.85595 | 0.68568  |
| H | -3.42930 | -1.94994 | 2.54115  |
| H | -5.71925 | -1.16725 | 1.41327  |
| H | -5.53187 | -1.48436 | -1.20802 |
| C | 1.72475  | -1.68160 | 0.02289  |
| H | 4.01767  | -1.68764 | -1.40593 |
| C | 5.45964  | 0.31120  | 1.04845  |

---

|   |         |          |          |
|---|---------|----------|----------|
| C | 5.28355 | -0.24117 | -0.38072 |
| C | 4.13658 | -1.27332 | -0.39576 |
| C | 2.81172 | -0.60614 | 0.05983  |
| C | 3.00647 | -0.04383 | 1.48914  |
| C | 4.15162 | 0.99053  | 1.50282  |
| H | 6.28623 | 1.03177  | 1.07250  |
| H | 5.72510 | -0.49988 | 1.73867  |
| H | 2.07431 | 0.41900  | 1.83649  |
| H | 3.23252 | -0.86573 | 2.18243  |
| C | 3.81073 | 2.14677  | 0.54061  |
| H | 4.27160 | 1.37986  | 2.52101  |
| H | 2.89194 | 2.65217  | 0.86700  |
| H | 4.60976 | 2.89793  | 0.55901  |
| C | 3.63598 | 1.59537  | -0.88935 |
| H | 3.38874 | 2.41486  | -1.57506 |
| C | 2.48939 | 0.56247  | -0.90242 |
| H | 2.33348 | 0.17745  | -1.91830 |
| H | 1.55370 | 1.04977  | -0.59721 |
| C | 4.94360 | 0.91455  | -1.34302 |
| H | 5.76204 | 1.64461  | -1.35643 |
| H | 4.83792 | 0.53602  | -2.36781 |
| H | 6.20862 | -0.73233 | -0.70467 |
| H | 4.37897 | -2.11359 | 0.26896  |
| H | 1.59075 | -2.08460 | -0.98296 |
| H | 1.95390 | -2.49158 | 0.72072  |

**TS 3I**

|   |          |          |          |
|---|----------|----------|----------|
| C | 0.13095  | -0.10537 | -0.33367 |
| C | 1.50703  | -0.11379 | 0.29888  |
| C | 2.55592  | -0.62609 | -0.49458 |
| C | 3.78195  | -1.01994 | 0.01450  |
| C | 4.78693  | -1.67077 | -0.74404 |
| C | 5.96551  | -2.10536 | -0.20859 |
| O | -0.80392 | -0.17653 | 0.60594  |
| O | -0.01712 | -0.02880 | -1.53882 |
| O | 6.27354  | -1.90727 | 1.07421  |

---

|   |          |          |          |
|---|----------|----------|----------|
| C | 2.30410  | 2.27371  | -1.02659 |
| C | 1.67264  | 2.02836  | 0.32489  |
| C | 2.68253  | 2.16743  | 1.28342  |
| C | 3.95201  | 2.20204  | 0.64625  |
| C | 3.76183  | 2.18709  | -0.71591 |
| H | 1.52934  | -0.26134 | 1.37251  |
| H | 2.35365  | -0.74647 | -1.55565 |
| H | 3.97664  | -0.87625 | 1.07548  |
| H | 4.62017  | -1.86761 | -1.79789 |
| H | 6.69473  | -2.63176 | -0.82096 |
| H | 7.12767  | -2.30395 | 1.29643  |
| H | 2.07468  | 3.30941  | -1.32908 |
| H | 1.94650  | 1.63653  | -1.83880 |
| H | 0.63020  | 2.23477  | 0.53707  |
| H | 2.52303  | 2.19501  | 2.35596  |
| H | 4.90762  | 2.22882  | 1.15532  |
| H | 4.54380  | 2.19209  | -1.46642 |
| C | -2.69697 | 1.08334  | -0.41892 |
| C | -2.26047 | -0.21421 | 0.27668  |
| C | -4.47090 | -0.37658 | 1.44959  |
| C | -4.93166 | 0.91659  | 0.74579  |
| C | -4.23128 | 1.03475  | -0.62267 |
| H | -2.18890 | 1.18595  | -1.38152 |
| H | -2.42487 | 1.94340  | 0.20665  |
| H | -6.01956 | 0.90249  | 0.61031  |
| H | -4.70044 | 1.79084  | 1.36773  |
| C | -4.58861 | -0.18689 | -1.49536 |
| H | -4.54697 | 1.95595  | -1.12547 |
| H | -5.67075 | -0.21680 | -1.66896 |
| H | -4.11013 | -0.10348 | -2.47911 |
| C | -4.13333 | -1.48056 | -0.78793 |
| H | -4.38011 | -2.34922 | -1.40873 |
| C | -4.83510 | -1.59780 | 0.58017  |
| H | -4.53378 | -2.52525 | 1.08320  |
| H | -5.92152 | -1.64892 | 0.44195  |
| H | -4.95222 | -0.45908 | 2.43058  |



---

|   |          |          |          |
|---|----------|----------|----------|
| C | -2.59950 | -1.43945 | -0.58423 |
| H | -2.08879 | -1.37786 | -1.54852 |
| H | -2.25528 | -2.34851 | -0.07595 |
| C | -2.93919 | -0.33088 | 1.64724  |
| H | -2.58620 | -1.23699 | 2.15320  |
| H | -2.65480 | 0.52535  | 2.27059  |

**TS 3m**

|   |          |          |          |
|---|----------|----------|----------|
| C | -0.15379 | 0.22494  | -0.67305 |
| C | -1.44057 | 0.01495  | 0.09033  |
| C | -2.52404 | -0.51107 | -0.64718 |
| C | -3.65009 | -1.07066 | -0.06737 |
| C | -4.67196 | -1.73201 | -0.79346 |
| C | -5.74580 | -2.33108 | -0.19948 |
| O | 0.89257  | 0.20088  | 0.14885  |
| O | -0.13243 | 0.41160  | -1.87407 |
| O | -5.93137 | -2.29789 | 1.12104  |
| C | -2.58026 | 2.43711  | -0.85544 |
| C | -1.78586 | 2.10665  | 0.38825  |
| C | -2.69419 | 2.04480  | 1.45229  |
| C | -4.02299 | 2.02242  | 0.95228  |
| C | -3.98197 | 2.17233  | -0.41485 |
| H | -1.32698 | -0.25093 | 1.13515  |
| H | -2.42964 | -0.50019 | -1.72988 |
| H | -3.74029 | -1.05674 | 1.01690  |
| H | -4.60225 | -1.80108 | -1.87399 |
| H | -6.48859 | -2.85842 | -0.79449 |
| H | -6.71971 | -2.79647 | 1.37858  |
| H | -2.26149 | 1.93384  | -1.77124 |
| H | -2.47670 | 3.51794  | -1.05007 |
| H | -0.74930 | 2.39338  | 0.52202  |
| H | -2.42122 | 1.97352  | 2.49965  |
| H | -4.91623 | 1.90080  | 1.55260  |
| H | -4.83884 | 2.18025  | -1.07858 |
| H | 2.10350  | 1.07047  | -1.29072 |
| C | 2.98948  | -1.91348 | 0.27238  |

---

|   |         |          |          |
|---|---------|----------|----------|
| C | 2.81090 | -0.95001 | -0.91990 |
| C | 2.23436 | 0.39267  | -0.44270 |
| C | 3.12758 | 1.01525  | 0.63706  |
| C | 3.30602 | 0.04024  | 1.82093  |
| C | 3.92995 | -1.27882 | 1.31854  |
| H | 3.40454 | -2.86184 | -0.08936 |
| H | 2.01800 | -2.14423 | 0.72583  |
| H | 3.95188 | 0.50401  | 2.57606  |
| H | 2.34070 | -0.15443 | 2.30268  |
| C | 5.30179 | -0.98987 | 0.67361  |
| H | 4.05611 | -1.96738 | 2.16232  |
| H | 5.98318 | -0.55633 | 1.41620  |
| H | 5.76099 | -1.92518 | 0.32991  |
| C | 5.12470 | -0.02000 | -0.51354 |
| H | 6.09818 | 0.18762  | -0.97239 |
| C | 4.50248 | 1.29995  | -0.01168 |
| H | 4.39347 | 2.00943  | -0.84195 |
| H | 5.15772 | 1.77527  | 0.72756  |
| H | 2.67502 | 1.95395  | 0.98084  |
| C | 4.18701 | -0.65527 | -1.56128 |
| H | 4.61484 | -1.59031 | -1.94119 |
| H | 4.06928 | 0.01294  | -2.42384 |
| H | 2.13727 | -1.38098 | -1.66939 |

**TS 3n**

|   |          |          |          |
|---|----------|----------|----------|
| C | -0.61187 | -1.17602 | 0.13883  |
| C | 0.68376  | -0.62776 | -0.40267 |
| C | 1.82398  | -0.78277 | 0.41644  |
| C | 3.12322  | -0.66054 | -0.04573 |
| C | 4.27330  | -0.95361 | 0.72886  |
| C | 5.54523  | -0.88908 | 0.23562  |
| O | -1.46071 | -1.44543 | -0.85520 |
| O | -0.82566 | -1.31855 | 1.32595  |
| O | 5.79836  | -0.49970 | -1.01450 |
| C | 0.49409  | 1.76366  | 1.11899  |
| C | 0.02560  | 1.40180  | -0.27268 |

---

|   |          |          |          |
|---|----------|----------|----------|
| C | 0.92507  | 1.98708  | -1.17342 |
| C | 2.07610  | 2.44449  | -0.47909 |
| C | 1.88310  | 2.25152  | 0.86937  |
| H | 0.79142  | -0.66909 | -1.48054 |
| H | 1.64873  | -1.05419 | 1.45421  |
| H | 3.28341  | -0.37637 | -1.08395 |
| H | 4.15832  | -1.27484 | 1.75876  |
| H | 6.39727  | -1.15749 | 0.85680  |
| H | 6.74474  | -0.54166 | -1.21208 |
| H | 0.38859  | 0.98274  | 1.87542  |
| H | -0.11403 | 2.61337  | 1.47230  |
| H | -1.01615 | 1.22542  | -0.51621 |
| H | 0.78394  | 2.03742  | -2.24773 |
| H | 2.95924  | 2.86800  | -0.94145 |
| H | 2.59310  | 2.49017  | 1.65281  |
| C | -2.81122 | -1.89743 | -0.45726 |
| H | -2.70839 | -2.57976 | 0.38597  |
| H | -3.16775 | -2.42781 | -1.33988 |
| C | -3.68999 | -0.76140 | -0.10909 |
| C | -4.07284 | -0.20058 | 1.07765  |
| C | -4.94931 | 0.88155  | 0.75243  |
| C | -5.03120 | 0.90401  | -0.60805 |
| O | -4.27022 | -0.08368 | -1.15188 |
| H | -3.76882 | -0.53126 | 2.06021  |
| H | -5.45889 | 1.54266  | 1.43787  |
| H | -5.57113 | 1.52200  | -1.30869 |

**TS 3o**

|   |          |          |          |
|---|----------|----------|----------|
| C | -1.14470 | -0.94191 | -0.34787 |
| C | 0.15591  | -0.51053 | 0.28217  |
| C | 1.32822  | -0.76037 | -0.46533 |
| C | 2.60149  | -0.75909 | 0.07870  |
| C | 3.76648  | -1.15191 | -0.62639 |
| C | 5.00536  | -1.20822 | -0.05434 |
| O | -2.05137 | -1.21977 | 0.59183  |
| O | -1.30447 | -0.99858 | -1.55012 |

---

|   |          |          |          |
|---|----------|----------|----------|
| O | 5.21369  | -0.85228 | 1.21382  |
| C | 0.29593  | 1.88950  | -1.22438 |
| C | -0.31094 | 1.56565  | 0.12181  |
| C | 0.56326  | 2.06523  | 1.09681  |
| C | 1.80189  | 2.41819  | 0.49976  |
| C | 1.69948  | 2.24678  | -0.86195 |
| H | 0.19287  | -0.57174 | 1.36389  |
| H | 1.19726  | -1.00626 | -1.51597 |
| H | 2.72088  | -0.49727 | 1.12823  |
| H | 3.68767  | -1.45454 | -1.66532 |
| H | 5.86661  | -1.54997 | -0.62474 |
| H | 6.13785  | -0.98277 | 1.46951  |
| H | -0.20182 | 2.79433  | -1.61220 |
| H | 0.17574  | 1.12550  | -1.99531 |
| H | -1.38138 | 1.48551  | 0.27667  |
| H | 0.34370  | 2.12457  | 2.15744  |
| H | 2.68039  | 2.75807  | 1.03437  |
| H | 2.48781  | 2.42265  | -1.58475 |
| C | -3.41075 | -1.55351 | 0.12585  |
| H | -3.73860 | -2.32935 | 0.82107  |
| H | -3.33790 | -1.95768 | -0.88293 |
| C | -4.28211 | -0.32577 | 0.18985  |
| C | -4.66430 | 0.27818  | -0.94089 |
| H | -4.36390 | -0.09460 | -1.91546 |
| C | -4.68289 | 0.14365  | 1.56518  |
| H | -5.30510 | 1.15515  | -0.92683 |
| H | -3.80513 | 0.30735  | 2.20162  |
| H | -5.25599 | 1.07248  | 1.52232  |
| H | -5.29783 | -0.61156 | 2.07028  |

**TS 3p**

|   |          |          |          |
|---|----------|----------|----------|
| C | 0.25407  | -1.18579 | 0.25515  |
| C | -0.97531 | -0.54503 | -0.34119 |
| C | -2.20443 | -0.84132 | 0.28879  |
| C | -3.43956 | -0.63349 | -0.30082 |
| C | -4.66944 | -1.06120 | 0.25892  |

---

|   |          |          |          |
|---|----------|----------|----------|
| C | -5.87266 | -0.90346 | -0.36744 |
| O | 1.22829  | -1.26979 | -0.64790 |
| O | 0.31317  | -1.54021 | 1.41633  |
| O | -5.97912 | -0.29000 | -1.54705 |
| C | -1.00738 | 1.52696  | 1.59678  |
| C | -0.38007 | 1.42589  | 0.22407  |
| C | -1.18490 | 2.16797  | -0.65009 |
| C | -2.41459 | 2.49205  | -0.01838 |
| C | -2.36882 | 2.05455  | 1.28519  |
| H | -0.94864 | -0.39326 | -1.41424 |
| H | -2.15195 | -1.29756 | 1.27392  |
| H | -3.47792 | -0.16284 | -1.28129 |
| H | -4.67431 | -1.56664 | 1.21893  |
| H | -6.78866 | -1.27898 | 0.08399  |
| H | -6.89336 | -0.29226 | -1.86411 |
| H | -0.45974 | 2.29660  | 2.16645  |
| H | -0.97145 | 0.61961  | 2.20410  |
| H | 0.68513  | 1.29313  | 0.06996  |
| H | -0.92697 | 2.41371  | -1.67465 |
| H | -3.24923 | 2.99375  | -0.49242 |
| H | -3.16604 | 2.14568  | 2.01388  |
| C | 2.51341  | -1.83226 | -0.18215 |
| C | 3.30689  | -0.82391 | 0.59799  |
| H | 3.01633  | -2.11739 | -1.10446 |
| H | 2.28136  | -2.71587 | 0.41641  |
| C | 4.38747  | -0.24700 | 0.12289  |
| C | 5.48132  | 0.30569  | -0.34031 |
| H | 2.96357  | -0.61208 | 1.60997  |
| C | 6.83788  | -0.33719 | -0.13984 |
| C | 5.45266  | 1.61746  | -1.09558 |
| H | 6.06680  | 2.36547  | -0.58050 |
| H | 5.87710  | 1.48904  | -2.09833 |
| H | 4.43921  | 2.01120  | -1.19626 |
| H | 6.76877  | -1.27349 | 0.41652  |
| H | 7.30962  | -0.54050 | -1.10851 |
| H | 7.50230  | 0.34323  | 0.40562  |

---

**TS 3q**

|   |          |          |          |
|---|----------|----------|----------|
| H | 3.85274  | -0.66119 | -1.96606 |
| C | 4.00530  | -0.99076 | -0.94168 |
| C | 2.98010  | -0.95852 | -0.02440 |
| C | 1.72802  | -0.50578 | -0.52028 |
| C | 0.53841  | -0.46173 | 0.18966  |
| C | -0.70783 | -0.15262 | -0.40412 |
| C | -1.92962 | -0.60698 | 0.35787  |
| O | 5.24842  | -1.39808 | -0.75452 |
| C | -4.20671 | -1.26388 | 0.15128  |
| H | 1.69622  | -0.21562 | -1.57010 |
| H | 0.51999  | -0.73769 | 1.23898  |
| H | -0.80118 | -0.18414 | -1.48415 |
| H | -4.50460 | -0.53101 | 0.90626  |
| H | -3.99628 | -2.20741 | 0.66143  |
| C | 0.95121  | 2.51973  | 0.77218  |
| C | 0.98959  | 2.76071  | -0.58259 |
| C | -0.27982 | 2.45111  | -1.13508 |
| C | -1.10928 | 1.90060  | -0.14667 |
| C | -0.43633 | 2.15644  | 1.18456  |
| H | 1.77495  | 2.65448  | 1.46382  |
| H | 1.84387  | 3.12514  | -1.13995 |
| H | -0.55238 | 2.57296  | -2.17795 |
| H | -2.18639 | 1.85129  | -0.26041 |
| H | -0.90541 | 3.04647  | 1.63699  |
| H | -0.52487 | 1.35807  | 1.92469  |
| H | 5.39612  | -1.71626 | 0.15105  |
| C | 3.13976  | -1.40329 | 1.40885  |
| H | 2.56113  | -2.31027 | 1.61147  |
| H | 4.17818  | -1.61635 | 1.67999  |
| H | 2.79396  | -0.62745 | 2.09918  |
| O | -1.94204 | -0.75472 | 1.56333  |
| O | -2.96145 | -0.79842 | -0.46443 |
| C | -5.23117 | -1.41509 | -0.95226 |
| H | -6.17475 | -1.76383 | -0.52312 |

---

|   |          |          |          |
|---|----------|----------|----------|
| H | -5.41661 | -0.46172 | -1.45426 |
| H | -4.90389 | -2.14536 | -1.69679 |

**TS 3r**

|   |          |          |          |
|---|----------|----------|----------|
| C | -2.03264 | -0.84997 | 0.15003  |
| C | -0.75131 | -0.30404 | -0.43316 |
| C | 0.41983  | -0.55056 | 0.32216  |
| C | 1.70192  | -0.49945 | -0.20443 |
| C | 2.86228  | -0.90558 | 0.49018  |
| C | 4.11843  | -0.90414 | -0.07106 |
| O | -2.90885 | -1.13253 | -0.81644 |
| O | -2.20927 | -0.99135 | 1.34333  |
| O | 4.26217  | -0.45113 | -1.32396 |
| C | -0.78031 | 1.98495  | 1.18009  |
| C | -1.29009 | 1.70442  | -0.21783 |
| C | -0.38793 | 2.31018  | -1.10787 |
| C | 0.79817  | 2.66902  | -0.42078 |
| C | 0.62848  | 2.40382  | 0.92019  |
| H | -0.69349 | -0.33061 | -1.51562 |
| H | 0.28122  | -0.85283 | 1.35685  |
| H | 1.82750  | -0.17928 | -1.23686 |
| H | 2.77136  | -1.26749 | 1.50844  |
| C | 5.34507  | -1.38341 | 0.63472  |
| H | 5.18022  | -0.53045 | -1.62238 |
| H | -0.91911 | 1.18313  | 1.90809  |
| H | -1.33084 | 2.85661  | 1.57248  |
| H | -2.34570 | 1.60791  | -0.44668 |
| H | -0.55172 | 2.42863  | -2.17355 |
| H | 1.69134  | 3.07351  | -0.88093 |
| H | 1.36999  | 2.55628  | 1.69588  |
| C | -4.19548 | -1.69883 | -0.40378 |
| H | -4.02048 | -2.35629 | 0.44956  |
| H | -4.50579 | -2.28995 | -1.26642 |
| C | -5.19426 | -0.60383 | -0.07587 |
| H | -6.16284 | -1.05656 | 0.15722  |
| H | -5.33285 | 0.07109  | -0.92524 |

---

|   |          |          |         |
|---|----------|----------|---------|
| H | -4.87443 | -0.02883 | 0.79707 |
| H | 5.12033  | -1.72187 | 1.64603 |
| H | 5.79858  | -2.21745 | 0.08426 |
| H | 6.09124  | -0.58111 | 0.69285 |

**TS 3s**

|   |          |          |          |
|---|----------|----------|----------|
| C | 0.09904  | -0.11013 | -0.25880 |
| C | 1.48845  | -0.09214 | 0.31526  |
| C | 2.50633  | -0.63006 | -0.51549 |
| C | 3.73871  | -1.04352 | -0.04830 |
| C | 4.70493  | -1.71891 | -0.83852 |
| C | 5.89395  | -2.17023 | -0.34472 |
| O | -0.79384 | -0.15231 | 0.74309  |
| O | -0.12619 | -0.06275 | -1.45067 |
| O | 6.25313  | -1.96956 | 0.92600  |
| C | 2.22024  | 2.25492  | -1.05507 |
| C | 1.66331  | 1.99509  | 0.32938  |
| C | 2.72650  | 2.16370  | 1.23213  |
| C | 3.95627  | 2.20385  | 0.52825  |
| C | 3.69220  | 2.17701  | -0.82285 |
| H | 1.54710  | -0.25405 | 1.38555  |
| H | 2.26241  | -0.76048 | -1.56646 |
| H | 3.97615  | -0.89440 | 1.00328  |
| H | 4.49530  | -1.92021 | -1.88389 |
| H | 7.10763  | -2.38057 | 1.11786  |
| H | 1.96824  | 3.29203  | -1.33360 |
| H | 1.82641  | 1.62320  | -1.85448 |
| H | 0.63960  | 2.23016  | 0.59867  |
| H | 2.62447  | 2.20196  | 2.31135  |
| H | 4.93830  | 2.24207  | 0.98343  |
| H | 4.43277  | 2.17728  | -1.61431 |
| H | 6.59113  | -2.71271 | -0.97978 |
| C | -2.86390 | -0.19258 | -0.63744 |
| C | -2.19026 | -0.20366 | 0.59929  |
| C | -2.85579 | -0.26964 | 1.82415  |
| C | -4.25561 | -0.32254 | 1.87454  |



---

|   |          |          |          |
|---|----------|----------|----------|
| H | -2.34886 | -0.14628 | -1.58357 |
| H | -2.27194 | -0.28142 | 2.73707  |
| H | -4.78790 | -0.37283 | 2.81653  |
| C | -4.92487 | -0.31019 | 0.66495  |
| C | -4.24086 | -0.24790 | -0.55135 |
| O | -5.13431 | -0.24774 | -1.58303 |
| C | -6.43974 | -0.32881 | -0.98760 |
| O | -6.26837 | -0.35123 | 0.43912  |
| H | -7.02562 | 0.55182  | -1.27023 |
| H | -6.93202 | -1.25241 | -1.31030 |

---

## Functional dependence on geometry optimization

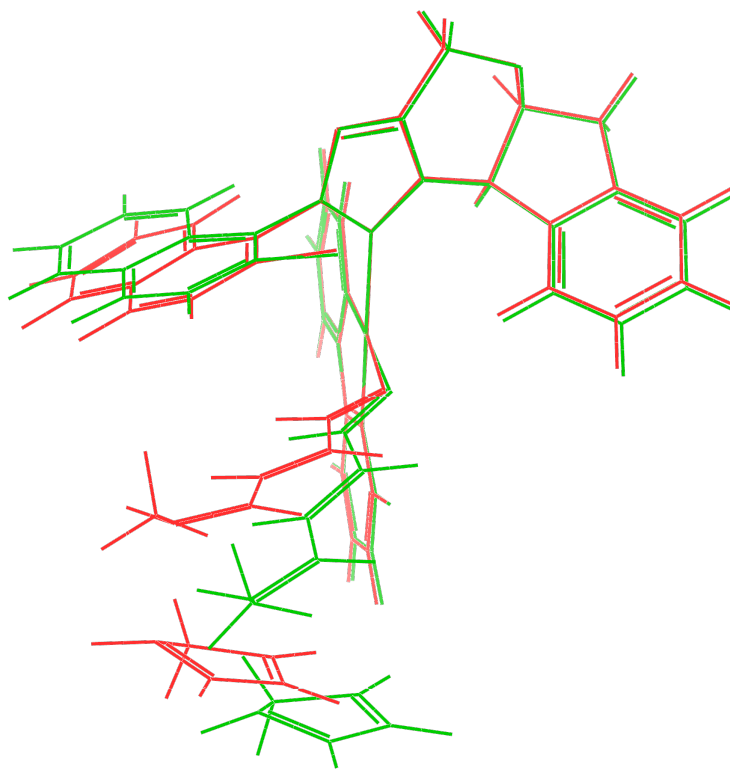

M06/lanl2dz-6-31G(d) (red) and B3LYP/lanl2dz-6-31G(d) (green) optimized geometry comparison shows that the largest difference is position of the aldehyde relative to the catalyst aromatic substituent. This suggests that the B3LYP method does not capture the important  $\pi$ - $\pi$  stereocontrolling interaction in the lowest energy TS leading to a reduction in the predicted enantioselectivity with this method.

## 8. Parameters Collected

The parameters calculated and considered for the systems are reported in Tables S2-S11. Sterimol parameters L, B1 and B5, respectively, represent the length, minimum and maximum widths of the considered substituent and are calculated using the Bondi radii.<sup>24, 25</sup> IR stretching frequencies, intensities, NBO charges have been found to be useful descriptors of electronic and steric properties, hence these have been calculated.<sup>26</sup> Interaction energies have been calculated using the equation  $E_{int} = E_{SC} - E_{Cat} - E_{Sub}$ .  $E_{SC}$  is the energy of the ground state substrate-catalyst complex and this can be dissected into two parts, the catalyst contribution,  $E_{Cat}$  and the substrate,  $E_{Sub}$ . The difference between these represents,  $E_{int}$ , which is the interaction energy calculated upon complex formation, since the energy to distort the aromatic group and substrate in these isolated forms is both small and consistent as shown below. The parameters are defined as shown in Figure S3.

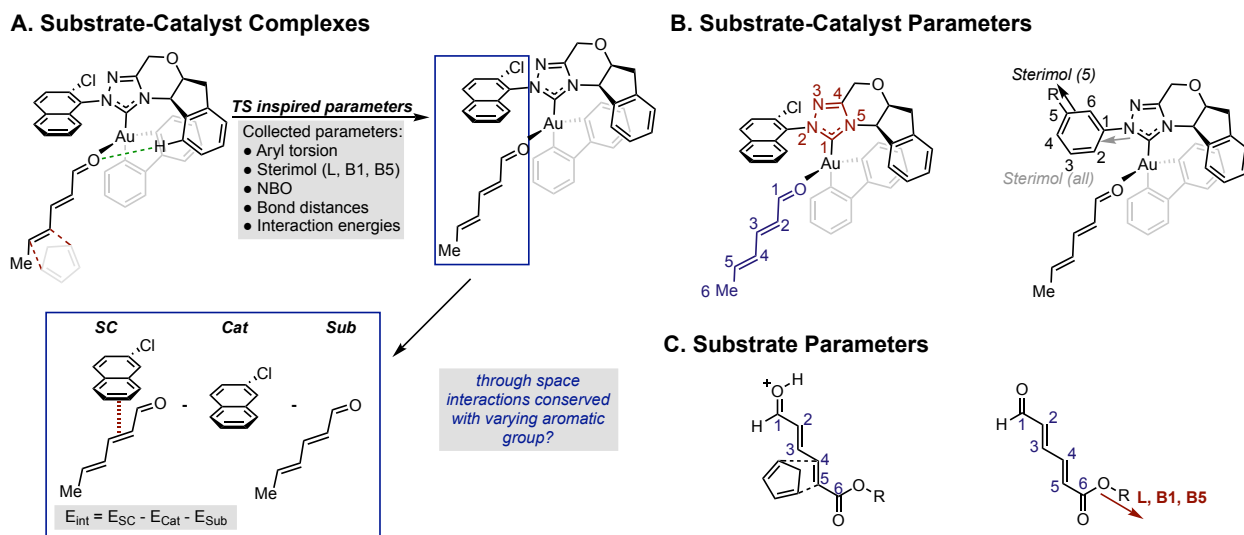

**Figure S3.** Numbering and definition of parameters collected.

## 8.1 Select examples of RMSD and Distortion energies

| Fragment      | RMSD   | Distortion Energy |
|---------------|--------|-------------------|
| Sub <b>4g</b> | 0.0324 | 2.23              |
| Cat <b>4g</b> | 0.0244 | 0.65              |
| Sub <b>4k</b> | 0.0383 | 2.05              |
| Cat <b>4k</b> | 0.0820 | 1.25              |
| Sub <b>4l</b> | 0.0300 | 2.30              |
| Cat <b>4l</b> | 0.2298 | 1.57              |
| Sub <b>4o</b> | 0.0275 | 2.14              |
| Cat <b>4o</b> | 0.0188 | 0.62              |
| Sub <b>4p</b> | 0.0349 | 2.13              |
| Cat <b>4p</b> | 0.0193 | 0.63              |

Distortion energies quoted in kcal mol<sup>-1</sup>,  $E_{dis}$ , are calculated as  $E_{dis} = E_g - E_{frag}$ .  $E_g$  is the ground state of either the aldehyde (sub) or aromatic substituent (cat) and  $E_{frag}$  is the distorted aldehyde (sub) or aromatic substituent (cat). Since RMSDs and distortion energies are small and consistent  $E_{int} = E_{sc} - E_{cat} - E_{sub}$  accurately reflects the changes in interaction energy on complex formation.

## 8.2 Catalyst Parameter Tables

**Table S2.** Interaction energies in kcal mol<sup>-1</sup> and aryl torsion as descriptors.

| catalyst  | interaction energies | aryl torsion |
|-----------|----------------------|--------------|
| <b>4g</b> | -2.72                | 134.9        |
| <b>4h</b> | -4.83                | 139.2        |
| <b>4i</b> | -6.44                | 138.5        |
| <b>4j</b> | -2.97                | 133.9        |
| <b>4k</b> | -3.66                | 113.1        |
| <b>4l</b> | -4.52                | 94.0         |
| <b>4m</b> | -5.41                | 99.8         |
| <b>4n</b> | -4.09                | 97.0         |
| <b>4o</b> | -2.52                | 110.9        |
| <b>4p</b> | -2.69                | 97.2         |
| <b>4q</b> | -2.71                | 95.4         |
| <b>4r</b> | -2.22                | 100.6        |
| <b>4s</b> | -4.38                | 99.4         |
| <b>4t</b> | -5.25                | 139.6        |
| <b>4u</b> | -4.87                | 110.6        |
| <b>4v</b> | -5.28                | 111.2        |
| <b>4w</b> | -6.51                | 111.6        |
| <b>4x</b> | -4.91                | 99.9         |
| <b>4y</b> | -4.54                | 102.5        |

**Table S3.** NBO charges on the triazole.

| <b>catalyst</b> | <b>Au</b> | <b>C1</b> | <b>N2</b> | <b>N3</b> | <b>C4</b> | <b>N5</b> |
|-----------------|-----------|-----------|-----------|-----------|-----------|-----------|
| <b>4g</b>       | 1.022     | 0.127     | -0.207    | -0.250    | 0.352     | -0.369    |
| <b>4h</b>       | 1.018     | 0.133     | -0.211    | -0.250    | 0.356     | -0.370    |
| <b>4i</b>       | 1.013     | 0.136     | -0.214    | -0.252    | 0.359     | -0.369    |
| <b>4j</b>       | 1.030     | 0.126     | -0.200    | -0.249    | 0.349     | -0.370    |
| <b>4k</b>       | 1.028     | 0.145     | -0.198    | -0.232    | 0.343     | -0.373    |
| <b>4l</b>       | 1.036     | 0.139     | -0.218    | -0.253    | 0.347     | -0.380    |
| <b>4m</b>       | 1.033     | 0.137     | -0.216    | -0.251    | 0.347     | -0.378    |
| <b>4n</b>       | 1.028     | 0.136     | -0.217    | -0.251    | 0.347     | -0.376    |
| <b>4o</b>       | 1.013     | 0.143     | -0.211    | -0.237    | 0.351     | -0.368    |
| <b>4p</b>       | 1.023     | 0.148     | -0.220    | -0.239    | 0.352     | -0.373    |
| <b>4q</b>       | 1.024     | 0.149     | -0.225    | -0.240    | 0.353     | -0.374    |
| <b>4r</b>       | 1.022     | 0.148     | -0.231    | -0.245    | 0.358     | -0.374    |
| <b>4s</b>       | 1.020     | 0.150     | -0.226    | -0.240    | 0.354     | -0.374    |
| <b>4t</b>       | 1.023     | 0.128     | -0.204    | -0.252    | 0.353     | -0.370    |
| <b>4u</b>       | 1.026     | 0.132     | -0.219    | -0.247    | 0.348     | -0.373    |
| <b>4v</b>       | 1.029     | 0.134     | -0.216    | -0.247    | 0.348     | -0.374    |
| <b>4w</b>       | 1.029     | 0.135     | -0.217    | -0.247    | 0.348     | -0.374    |
| <b>4x</b>       | 1.031     | 0.139     | -0.219    | -0.248    | 0.347     | -0.376    |
| <b>4y</b>       | 1.023     | 0.144     | -0.221    | -0.244    | 0.349     | -0.375    |

**Table S4.** NBO charges on the aromatic substituents.

| <b>catalyst</b> | <b>C1</b> | <b>C2</b> | <b>C3</b> | <b>C4</b> | <b>C5</b> | <b>C6</b> |
|-----------------|-----------|-----------|-----------|-----------|-----------|-----------|
| <b>4g</b>       | 0.121     | -0.198    | -0.184    | -0.197    | -0.195    | -0.218    |
| <b>4h</b>       | 0.164     | -0.230    | -0.005    | -0.243    | -0.017    | -0.255    |
| <b>4i</b>       | 0.143     | -0.156    | -0.117    | -0.154    | -0.128    | -0.180    |
| <b>4j</b>       | 0.113     | -0.198    | -0.021    | 0.299     | -0.017    | -0.234    |
| <b>4k</b>       | -0.006    | 0.346     | -0.335    | -0.142    | -0.329    | 0.348     |
| <b>4l</b>       | 0.093     | 0.034     | -0.221    | -0.174    | -0.217    | 0.033     |
| <b>4m</b>       | 0.101     | 0.019     | -0.221    | -0.172    | -0.208    | 0.023     |
| <b>4n</b>       | 0.099     | 0.014     | -0.212    | -0.173    | -0.205    | 0.017     |
| <b>4o</b>       | -0.027    | 0.432     | -0.291    | -0.150    | -0.288    | 0.434     |
| <b>4p</b>       | 0.066     | -0.021    | -0.223    | -0.161    | -0.219    | -0.019    |
| <b>4q</b>       | 0.057     | -0.086    | -0.225    | -0.163    | -0.219    | -0.083    |
| <b>4r</b>       | 0.181     | -0.129    | -0.150    | -0.180    | -0.154    | -0.133    |
| <b>4s</b>       | 0.084     | -0.019    | -0.201    | -0.100    | -0.200    | -0.017    |
| <b>4t</b>       | 0.130     | -0.207    | -0.149    | -0.059    | -0.057    | -0.193    |
| <b>4u</b>       | 0.138     | -0.062    | -0.056    | -0.158    | -0.203    | -0.184    |
| <b>4v</b>       | 0.135     | -0.066    | -0.026    | -0.028    | -0.068    | -0.150    |
| <b>4w</b>       | 0.138     | -0.061    | -0.012    | -0.015    | -0.064    | -0.149    |
| <b>4x</b>       | 0.120     | -0.049    | -0.065    | -0.149    | -0.200    | 0.023     |
| <b>4y</b>       | 0.104     | -0.044    | -0.063    | -0.142    | -0.220    | -0.020    |

**Table S5.** NBO charges on the substrate.

| <b>catalyst</b> | <b>O</b> | <b>C1</b> | <b>C2</b> | <b>C3</b> | <b>C4</b> | <b>C5</b> | <b>C6</b> |
|-----------------|----------|-----------|-----------|-----------|-----------|-----------|-----------|
| <b>4g</b>       | -0.629   | 0.418     | -0.347    | -0.034    | -0.284    | -0.012    | -0.648    |
| <b>4h</b>       | -0.634   | 0.412     | -0.353    | -0.032    | -0.287    | -0.01     | -0.648    |
| <b>4i</b>       | -0.637   | 0.409     | -0.355    | -0.034    | -0.293    | -0.006    | -0.649    |
| <b>4j</b>       | -0.627   | 0.419     | -0.350    | -0.038    | -0.289    | -0.011    | -0.649    |
| <b>4k</b>       | -0.620   | 0.421     | -0.349    | -0.043    | -0.287    | -0.017    | -0.647    |
| <b>4l</b>       | -0.634   | 0.425     | -0.353    | -0.034    | -0.283    | -0.012    | -0.647    |
| <b>4m</b>       | -0.631   | 0.423     | -0.354    | -0.032    | -0.288    | -0.011    | -0.648    |
| <b>4n</b>       | -0.635   | 0.422     | -0.353    | -0.034    | -0.286    | -0.01     | -0.648    |
| <b>4o</b>       | -0.626   | 0.413     | -0.348    | -0.037    | -0.286    | -0.011    | -0.648    |
| <b>4p</b>       | -0.624   | 0.417     | -0.348    | -0.04     | -0.285    | -0.011    | -0.648    |
| <b>4q</b>       | -0.624   | 0.419     | -0.348    | -0.039    | -0.285    | -0.012    | -0.647    |
| <b>4r</b>       | -0.624   | 0.414     | -0.352    | -0.038    | -0.287    | -0.009    | -0.648    |
| <b>4s</b>       | -0.630   | 0.412     | -0.356    | -0.033    | -0.291    | -0.001    | -0.649    |
| <b>4t</b>       | -0.630   | 0.417     | -0.35     | -0.032    | -0.286    | -0.015    | -0.648    |
| <b>4u</b>       | -0.631   | 0.421     | -0.349    | -0.032    | -0.282    | -0.022    | -0.645    |
| <b>4v</b>       | -0.630   | 0.421     | -0.346    | -0.032    | -0.28     | -0.024    | -0.646    |
| <b>4w</b>       | -0.632   | 0.419     | -0.347    | -0.03     | -0.284    | -0.02     | -0.647    |
| <b>4x</b>       | -0.633   | 0.422     | -0.348    | -0.029    | -0.282    | -0.021    | -0.645    |
| <b>4y</b>       | -0.629   | 0.421     | -0.349    | -0.032    | -0.282    | -0.021    | -0.646    |

**Table S6.** Sterimol parameters calculated using Bondi radii for the whole aromatic substituent and individual substituents at positions 1-3.

| <b>catalyst</b> | <b>L(all)</b> | <b>B1(all)</b> | <b>B5(all)</b> | <b>L(2)</b> | <b>B1(2)</b> | <b>B5(2)</b> | <b>L(3)</b> | <b>B1(3)</b> | <b>B5(3)</b> |
|-----------------|---------------|----------------|----------------|-------------|--------------|--------------|-------------|--------------|--------------|
| <b>4g</b>       | 6.75          | 1.70           | 3.25           | 2.57        | 1.09         | 1.09         | 2.57        | 1.09         | 1.09         |
| <b>4h</b>       | 6.76          | 1.70           | 4.45           | 2.57        | 1.09         | 1.09         | 3.87        | 1.75         | 1.75         |
| <b>4i</b>       | 7.39          | 2.43           | 4.94           | 2.57        | 1.09         | 1.09         | 3.88        | 2.07         | 2.72         |
| <b>4j</b>       | 8.59          | 3.17           | 5.78           | 2.57        | 1.09         | 1.09         | 4.74        | 2.82         | 3.28         |
| <b>4k</b>       | 6.74          | 1.90           | 5.41           | 4.56        | 1.52         | 3.13         | 2.57        | 1.09         | 1.09         |
| <b>4l</b>       | 6.74          | 3.01           | 5.67           | 4.70        | 2.00         | 3.26         | 2.57        | 1.09         | 1.09         |
| <b>4m</b>       | 6.75          | 2.01           | 5.75           | 4.74        | 1.70         | 3.23         | 2.57        | 1.09         | 1.09         |
| <b>4n</b>       | 6.74          | 1.93           | 4.46           | 3.59        | 1.70         | 2.11         | 2.57        | 1.09         | 1.09         |
| <b>4o</b>       | 6.76          | 1.70           | 3.80           | 3.19        | 1.47         | 1.47         | 2.57        | 1.09         | 1.09         |
| <b>4p</b>       | 6.76          | 1.74           | 4.45           | 3.87        | 1.75         | 1.75         | 2.57        | 1.09         | 1.09         |
| <b>4q</b>       | 6.76          | 1.84           | 4.69           | 4.13        | 1.85         | 1.85         | 2.57        | 1.09         | 1.09         |
| <b>4r</b>       | 6.76          | 2.41           | 5.00           | 3.91        | 2.07         | 2.72         | 2.57        | 1.09         | 1.09         |
| <b>4s</b>       | 8.10          | 2.32           | 4.45           | 3.87        | 1.75         | 1.75         | 2.57        | 1.09         | 1.09         |
| <b>4t</b>       | 8.87          | 1.70           | 4.42           | 2.57        | 1.09         | 1.09         | 2.57        | 1.09         | 1.09         |
| <b>4u</b>       | 6.84          | 1.70           | 5.69           | 6.69        | 2.24         | 9.85         | 7.00        | 1.97         | 10.94        |
| <b>4v</b>       | 8.83          | 1.70           | 5.70           | 6.65        | 2.18         | 9.63         | 6.86        | 2.21         | 10.96        |
| <b>4w</b>       | 8.92          | 1.70           | 5.71           | 6.52        | 2.30         | 9.65         | 6.96        | 2.24         | 10.84        |
| <b>4x</b>       | 6.77          | 1.76           | 5.70           | 7.54        | 2.33         | 9.91         | 7.06        | 2.02         | 10.95        |
| <b>4y</b>       | 6.80          | 1.70           | 5.69           | 7.39        | 2.33         | 10.07        | 6.98        | 2.02         | 10.96        |

**Table S7.** Sterimol parameters calculated using Bondi radii for the substituents at positions 4-6.

| <b>catalyst</b> | <b>L(4)</b> | <b>B1(4)</b> | <b>B5(4)</b> | <b>L(5)</b> | <b>B1(5)</b> | <b>B5(5)</b> | <b>L(6)</b> | <b>B1(6)</b> | <b>B5(6)</b> |
|-----------------|-------------|--------------|--------------|-------------|--------------|--------------|-------------|--------------|--------------|
| <b>4g</b>       | 2.57        | 1.09         | 1.09         | 2.57        | 1.09         | 1.09         | 2.57        | 1.09         | 1.09         |
| <b>4h</b>       | 2.57        | 1.09         | 1.09         | 3.88        | 1.75         | 1.75         | 2.57        | 1.09         | 1.09         |
| <b>4i</b>       | 2.57        | 1.09         | 1.09         | 3.87        | 2.07         | 2.72         | 2.57        | 1.09         | 1.09         |
| <b>4j</b>       | 4.51        | 1.40         | 3.16         | 4.70        | 2.82         | 3.27         | 2.57        | 1.09         | 1.09         |
| <b>4k</b>       | 2.57        | 1.09         | 1.09         | 2.57        | 1.09         | 1.09         | 4.56        | 1.39         | 3.14         |
| <b>4l</b>       | 2.57        | 1.09         | 1.09         | 2.57        | 1.09         | 1.09         | 4.67        | 1.97         | 3.26         |
| <b>4m</b>       | 2.57        | 1.09         | 1.09         | 2.57        | 1.09         | 1.09         | 4.67        | 1.70         | 3.25         |
| <b>4n</b>       | 2.57        | 1.09         | 1.09         | 2.57        | 1.09         | 1.09         | 3.59        | 1.70         | 2.11         |
| <b>4o</b>       | 2.57        | 1.09         | 1.09         | 2.57        | 1.09         | 1.09         | 3.19        | 1.47         | 1.47         |
| <b>4p</b>       | 2.57        | 1.09         | 1.09         | 2.57        | 1.09         | 1.09         | 3.87        | 1.75         | 1.75         |
| <b>4q</b>       | 2.57        | 1.09         | 1.09         | 2.57        | 1.09         | 1.09         | 4.13        | 1.85         | 1.85         |
| <b>4r</b>       | 2.57        | 1.09         | 1.09         | 2.57        | 1.09         | 1.09         | 3.90        | 2.08         | 2.72         |
| <b>4s</b>       | 3.88        | 2.07         | 2.73         | 2.57        | 1.09         | 1.09         | 3.87        | 1.75         | 1.75         |
| <b>4t</b>       | 4.68        | 2.78         | 10.23        | 5.30        | 2.03         | 9.97         | 2.57        | 1.09         | 1.09         |
| <b>4u</b>       | 2.57        | 1.09         | 1.09         | 2.57        | 1.09         | 1.09         | 2.57        | 1.09         | 1.09         |
| <b>4v</b>       | 4.75        | 2.93         | 10.01        | 4.68        | 2.10         | 9.59         | 2.57        | 1.09         | 1.09         |
| <b>4w</b>       | 4.80        | 3.00         | 9.98         | 4.67        | 2.26         | 9.54         | 2.57        | 1.09         | 1.09         |
| <b>4x</b>       | 2.57        | 1.09         | 1.09         | 2.57        | 1.09         | 1.09         | 3.59        | 1.70         | 2.11         |
| <b>4y</b>       | 2.57        | 1.09         | 1.09         | 2.57        | 1.09         | 1.09         | 3.87        | 1.75         | 1.75         |

### 8.3 Substrate Parameter Tables

**Table S8.** NBO charges on the substrate.

| <b>substrate</b> | <b>H</b> | <b>C1</b> | <b>O</b> | <b>C2</b> | <b>C3</b> | <b>C4</b> | <b>C5</b> | <b>C6</b> | <b>O(carbonyl)</b> | <b>O(ester)</b> |
|------------------|----------|-----------|----------|-----------|-----------|-----------|-----------|-----------|--------------------|-----------------|
| <b>3b</b>        | 0.105    | 0.387     | -0.498   | -0.271    | -0.163    | -0.160    | -0.270    | 0.750     | -0.591             | -0.497          |
| <b>3c</b>        | 0.105    | 0.387     | -0.497   | -0.270    | -0.164    | -0.158    | -0.272    | 0.746     | -0.590             | -0.489          |
| <b>3d</b>        | 0.105    | 0.387     | -0.499   | -0.273    | -0.161    | -0.163    | -0.265    | 0.760     | -0.603             | -0.516          |
| <b>3e</b>        | 0.105    | 0.386     | -0.499   | -0.270    | -0.162    | -0.160    | -0.269    | 0.749     | -0.597             | -0.495          |
| <b>3f</b>        | 0.105    | 0.388     | -0.499   | -0.270    | -0.162    | -0.159    | -0.269    | 0.752     | -0.591             | -0.503          |
| <b>3g</b>        | 0.105    | 0.387     | -0.499   | -0.269    | -0.162    | -0.157    | -0.269    | 0.755     | -0.599             | -0.488          |
| <b>3h</b>        | 0.105    | 0.387     | -0.497   | -0.270    | -0.164    | -0.158    | -0.271    | 0.750     | -0.598             | -0.492          |
| <b>3i</b>        | 0.107    | 0.386     | -0.492   | -0.260    | -0.170    | -0.144    | -0.283    | 0.751     | -0.580             | -0.483          |
| <b>3j</b>        | 0.104    | 0.388     | -0.500   | -0.272    | -0.161    | -0.161    | -0.266    | 0.755     | -0.598             | -0.498          |
| <b>3k</b>        | 0.105    | 0.387     | -0.499   | -0.272    | -0.162    | -0.161    | -0.268    | 0.753     | -0.590             | -0.501          |
| <b>3l</b>        | 0.104    | 0.387     | -0.500   | -0.274    | -0.160    | -0.165    | -0.263    | 0.761     | -0.602             | -0.513          |
| <b>3m</b>        | 0.105    | 0.387     | -0.499   | -0.272    | -0.161    | -0.162    | -0.266    | 0.756     | -0.595             | -0.509          |
| <b>3n</b>        | 0.105    | 0.387     | -0.498   | -0.269    | -0.163    | -0.156    | -0.270    | 0.754     | -0.597             | -0.484          |
| <b>3o</b>        | 0.105    | 0.387     | -0.498   | -0.269    | -0.164    | -0.158    | -0.270    | 0.751     | -0.589             | -0.495          |
| <b>3p</b>        | 0.106    | 0.387     | -0.500   | -0.274    | -0.160    | -0.171    | -0.257    | 0.749     | -0.577             | -0.502          |
| <b>3q</b>        | 0.109    | 0.399     | -0.510   | -0.079    | -0.174    | -0.159    | -0.274    | 0.750     | -0.595             | -0.498          |
| <b>3r</b>        | -0.701   | 0.535     | -0.530   | -0.287    | -0.147    | -0.155    | -0.275    | 0.750     | -0.596             | -0.497          |
| <b>3s</b>        | 0.105    | 0.388     | -0.497   | -0.266    | -0.165    | -0.153    | -0.275    | 0.754     | -0.569             | -0.490          |

**Table S9.** Sterimol parameters calculated using Bondi radii and polarizability parameters.

| substrate | L    | B1   | B5    | polarizability |
|-----------|------|------|-------|----------------|
| 3b        | 4.47 | 1.70 | 3.24  | 119.79         |
| 3c        | 3.53 | 1.70 | 2.13  | 106.51         |
| 3d        | 4.55 | 2.83 | 3.25  | 143.81         |
| 3e        | 5.19 | 1.70 | 13.40 | 216.19         |
| 3f        | 4.55 | 1.70 | 5.81  | 156.16         |
| 3g        | 5.06 | 1.70 | 6.11  | 171.38         |
| 3h        | 8.85 | 1.70 | 3.78  | 187.24         |
| 3i        | 5.06 | 1.70 | 3.83  | 120.08         |
| 3j        | 6.54 | 2.00 | 3.68  | 164.35         |
| 3k        | 6.59 | 1.70 | 6.47  | 212.61         |
| 3l        | 6.69 | 3.17 | 3.79  | 200.24         |
| 3m        | 6.59 | 1.99 | 5.01  | 200.20         |
| 3n        | 4.92 | 1.70 | 5.48  | 151.52         |
| 3o        | 4.84 | 1.70 | 4.54  | 144.72         |
| 3p        | 7.00 | 1.70 | 6.25  | 171.19         |
| 3q        | 4.47 | 1.70 | 3.24  | 132.95         |
| 3r        | 4.47 | 1.70 | 3.24  | 130.92         |
| 3s        | 7.69 | 1.83 | 3.87  | 184.66         |

**Table S10.** NBO charges from model *exo* TS.

| substrate | H      | C1    | O      | H2    | C2     | C3     | C4     | C5     | C6    | O(carbonyl) | O(ester) |
|-----------|--------|-------|--------|-------|--------|--------|--------|--------|-------|-------------|----------|
| 3b        | 0.200  | 0.295 | -0.632 | 0.511 | -0.383 | -0.033 | -0.285 | -0.149 | 0.750 | -0.587      | -0.490   |
| 3c        | 0.200  | 0.296 | -0.631 | 0.512 | -0.383 | -0.033 | -0.284 | -0.152 | 0.746 | -0.578      | -0.485   |
| 3d        | 0.199  | 0.293 | -0.633 | 0.511 | -0.383 | -0.031 | -0.287 | -0.138 | 0.761 | -0.596      | -0.520   |
| 3e        | 0.198  | 0.318 | -0.592 | 0.500 | -0.394 | -0.028 | -0.299 | -0.149 | 0.753 | -0.589      | -0.491   |
| 3f        | 0.199  | 0.293 | -0.632 | 0.511 | -0.381 | -0.033 | -0.285 | -0.147 | 0.752 | -0.582      | -0.498   |
| 3g        | 0.199  | 0.291 | -0.633 | 0.510 | -0.382 | -0.036 | -0.285 | -0.150 | 0.755 | -0.587      | -0.488   |
| 3h        | 0.199  | 0.291 | -0.633 | 0.510 | -0.382 | -0.033 | -0.285 | -0.146 | 0.757 | -0.586      | -0.494   |
| 3i        | 0.201  | 0.295 | -0.631 | 0.512 | -0.383 | -0.038 | -0.281 | -0.168 | 0.760 | -0.564      | -0.487   |
| 3j        | 0.199  | 0.292 | -0.632 | 0.511 | -0.382 | -0.033 | -0.286 | -0.144 | 0.755 | -0.591      | -0.497   |
| 3k        | 0.199  | 0.292 | -0.632 | 0.510 | -0.381 | -0.033 | -0.285 | -0.147 | 0.756 | -0.589      | -0.497   |
| 3l        | 0.199  | 0.290 | -0.633 | 0.510 | -0.381 | -0.033 | -0.287 | -0.137 | 0.762 | -0.596      | -0.515   |
| 3m        | 0.199  | 0.290 | -0.633 | 0.510 | -0.381 | -0.035 | -0.285 | -0.145 | 0.756 | -0.590      | -0.507   |
| 3n        | 0.200  | 0.292 | -0.633 | 0.511 | -0.382 | -0.036 | -0.285 | -0.150 | 0.753 | -0.586      | -0.485   |
| 3o        | 0.200  | 0.292 | -0.633 | 0.511 | -0.382 | -0.036 | -0.284 | -0.150 | 0.756 | -0.586      | -0.492   |
| 3p        | 0.199  | 0.291 | -0.633 | 0.510 | -0.381 | -0.035 | -0.286 | -0.147 | 0.751 | -0.590      | -0.486   |
| 3q        | 0.198  | 0.320 | -0.596 | 0.499 | -0.199 | -0.022 | -0.311 | -0.155 | 0.755 | -0.584      | -0.495   |
| 3r        | -0.690 | 0.478 | -0.636 | 0.504 | -0.378 | -0.033 | -0.284 | -0.169 | 0.757 | -0.590      | -0.491   |
| 3s        | 0.199  | 0.286 | -0.635 | 0.510 | -0.380 | -0.044 | -0.281 | -0.158 | 0.753 | -0.579      | -0.473   |



---

**Table S11.** Sterimol parameters calculated using Bondi radii from model *exo* TS.

| <b>substrate</b> | <b>L</b> | <b>B1</b> | <b>B5</b> |
|------------------|----------|-----------|-----------|
| <b>3b</b>        | 4.59     | 1.70      | 3.25      |
| <b>3c</b>        | 3.55     | 1.70      | 2.14      |
| <b>3d</b>        | 4.59     | 2.83      | 3.26      |
| <b>3e</b>        | 5.48     | 1.70      | 13.48     |
| <b>3f</b>        | 4.80     | 1.70      | 5.84      |
| <b>3g</b>        | 5.08     | 1.70      | 6.14      |
| <b>3h</b>        | 4.55     | 1.70      | 7.21      |
| <b>3i</b>        | 5.12     | 1.70      | 3.84      |
| <b>3j</b>        | 6.58     | 2.00      | 3.70      |
| <b>3k</b>        | 6.81     | 1.70      | 6.48      |
| <b>3l</b>        | 6.74     | 3.19      | 3.79      |
| <b>3m</b>        | 6.66     | 2.02      | 5.04      |
| <b>3n</b>        | 5.01     | 1.70      | 5.44      |
| <b>3o</b>        | 4.65     | 1.70      | 4.53      |
| <b>3p</b>        | 6.78     | 1.70      | 6.43      |
| <b>3q</b>        | 4.50     | 1.70      | 3.25      |
| <b>3r</b>        | 4.59     | 1.70      | 3.25      |
| <b>3s</b>        | 7.90     | 1.84      | 3.56      |

## 9. Model development

Measured  $\Delta\Delta G^\ddagger$  values were calculated using the formula  $\Delta\Delta G^\ddagger = -RT\ln(er)$  where R is the gas constant, T is temperature (298.15 K or 273.15 for catalyst 4s) and er is the enantiomeric ratio. Linear regression models were developed using an in-house script implemented in MATLAB® (version R2018b), to obtain the predicted  $\Delta\Delta G^\ddagger$ .<sup>27</sup> A good linear correlation ( $R^2$  close to 1.0 and intercept close to 0.0) between the predicted  $\Delta\Delta G^\ddagger$  and the measured  $\Delta\Delta G^\ddagger$  indicates that the obtained model adequately approximates the system under study.

### Catalyst Model

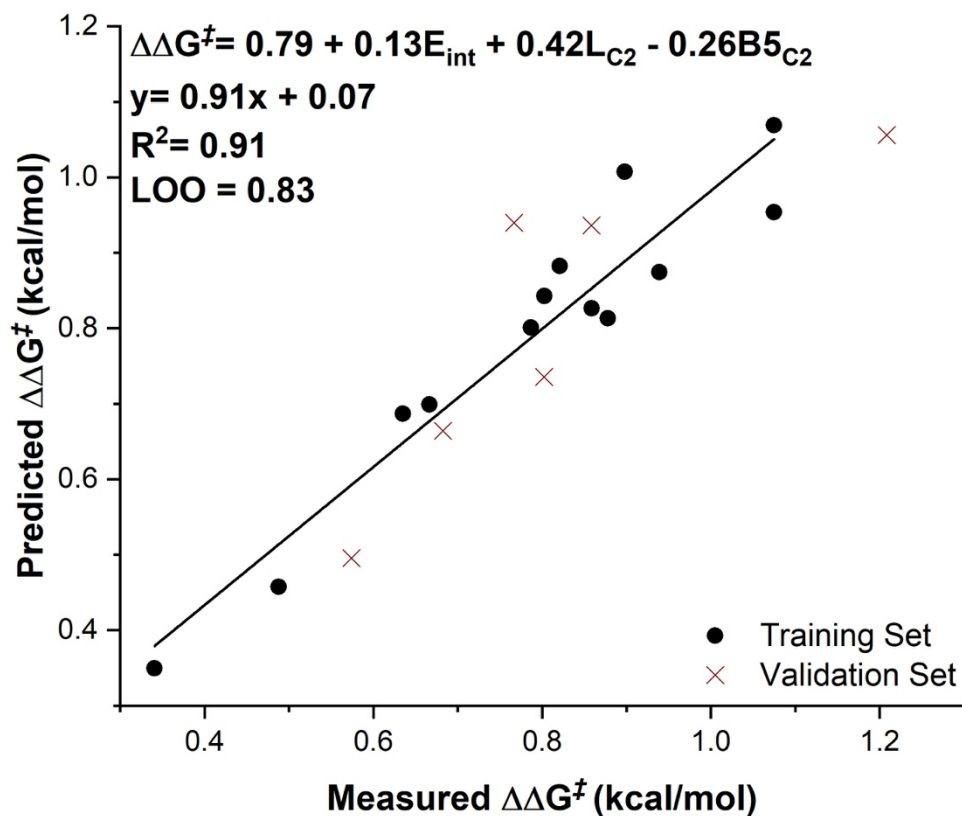

---

### Training Set

| measured $\Delta\Delta G^\ddagger$ | predicted $\Delta\Delta G^\ddagger$ | LOO  |
|------------------------------------|-------------------------------------|------|
| 0.63                               | 0.69                                | 0.73 |
| 0.82                               | 0.88                                | 0.90 |
| 0.88                               | 0.81                                | 0.78 |
| 0.86                               | 0.83                                | 0.81 |
| 1.07                               | 0.95                                | 0.92 |
| 0.90                               | 1.01                                | 1.05 |
| 0.79                               | 0.80                                | 0.80 |
| 0.34                               | 0.35                                | 0.36 |
| 0.94                               | 0.87                                | 0.84 |
| 0.49                               | 0.46                                | 0.44 |
| 0.80                               | 0.84                                | 0.86 |
| 0.67                               | 0.70                                | 0.71 |
| 1.07                               | 1.07                                | 1.07 |

### Prediction Set

| measured $\Delta\Delta G^\ddagger$ | predicted $\Delta\Delta G^\ddagger$ |
|------------------------------------|-------------------------------------|
| 0.86                               | 0.94                                |
| 0.80                               | 0.74                                |
| 0.77                               | 0.94                                |
| 0.57                               | 0.50                                |
| 0.68                               | 0.66                                |
| 1.21                               | 1.06                                |

**Substrate Model**

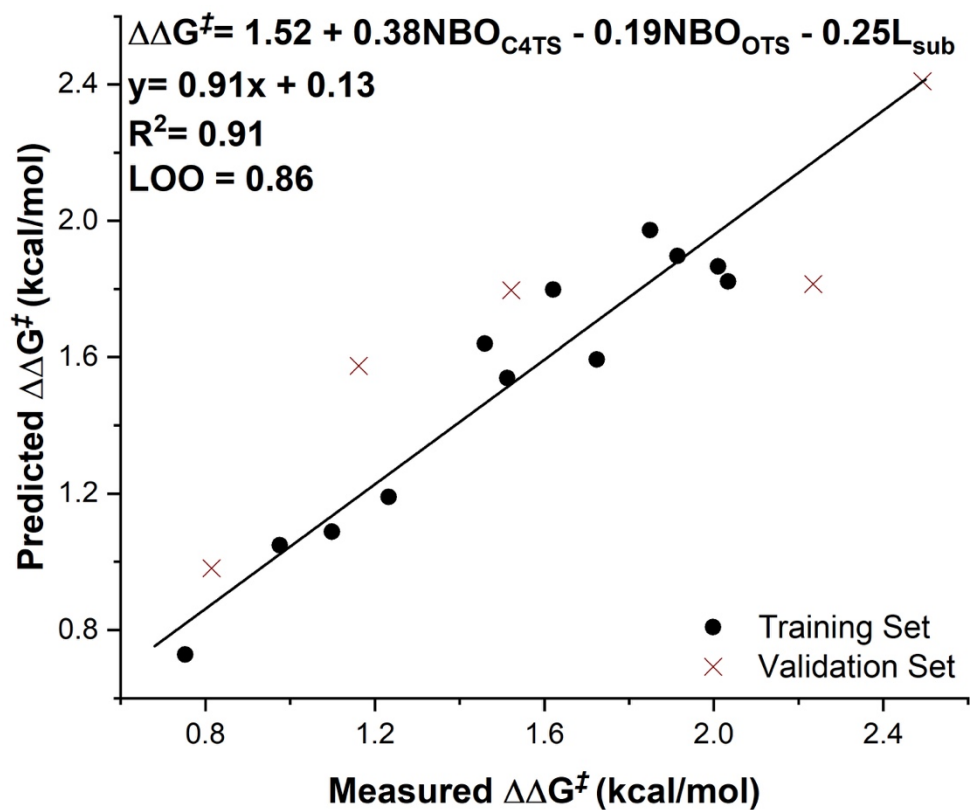

Training Set

| measured $\Delta\Delta G^\ddagger$ | predicted $\Delta\Delta G^\ddagger$ | LOO  |
|------------------------------------|-------------------------------------|------|
| 1.85                               | 1.97                                | 2.01 |
| 1.46                               | 1.64                                | 1.67 |
| 1.10                               | 1.09                                | 1.07 |
| 0.98                               | 1.05                                | 1.07 |
| 1.51                               | 1.54                                | 1.54 |
| 1.91                               | 1.90                                | 1.84 |
| 1.62                               | 1.80                                | 1.85 |
| 1.23                               | 1.19                                | 1.17 |
| 1.72                               | 1.59                                | 1.56 |
| 2.03                               | 1.82                                | 1.78 |
| 2.01                               | 1.87                                | 1.83 |
| 0.75                               | 0.73                                | 0.65 |

Prediction Set

| measured $\Delta\Delta G^\ddagger$ | predicted $\Delta\Delta G^\ddagger$ |
|------------------------------------|-------------------------------------|
| 1.52                               | 1.80                                |
| 2.49                               | 2.41                                |
| 1.16                               | 1.57                                |
| 2.23                               | 1.81                                |
| 0.82                               | 0.98                                |

## 10. $^1\text{H}$ and $^{13}\text{C}$ NMR Spectra of Isolated New Compounds.

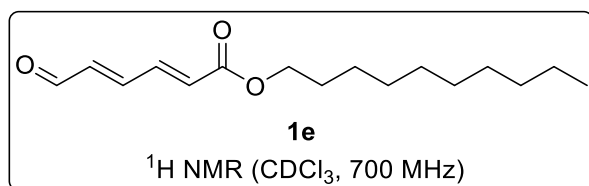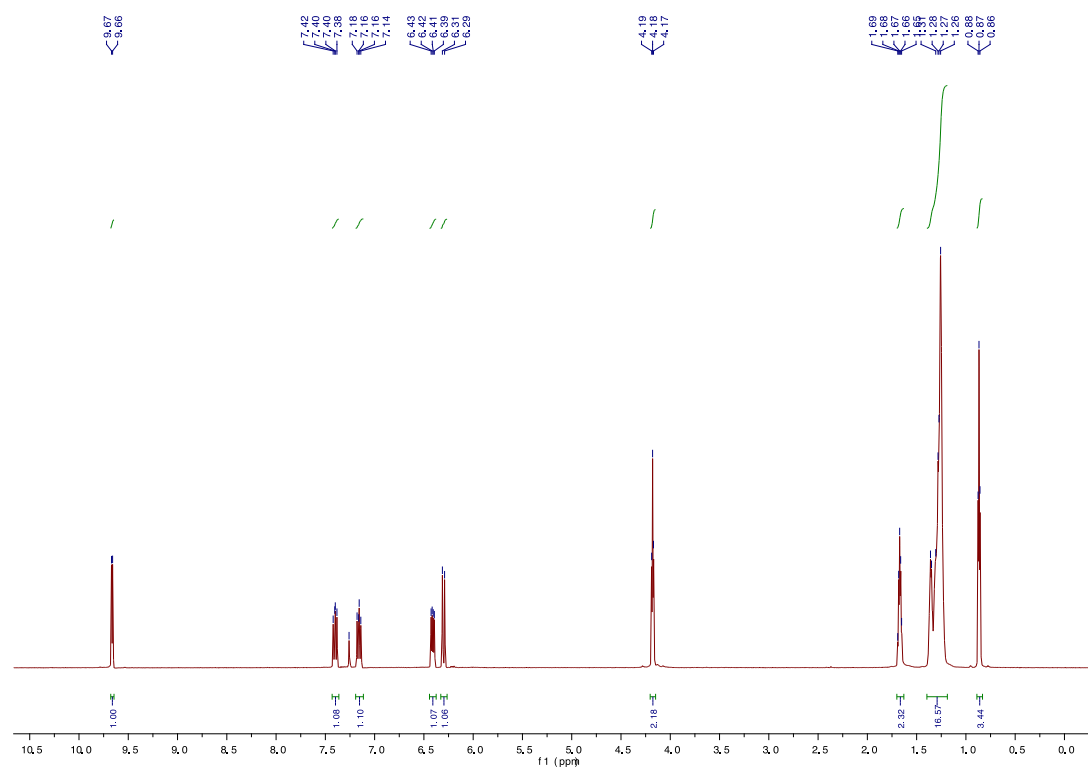

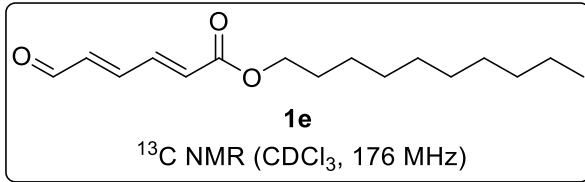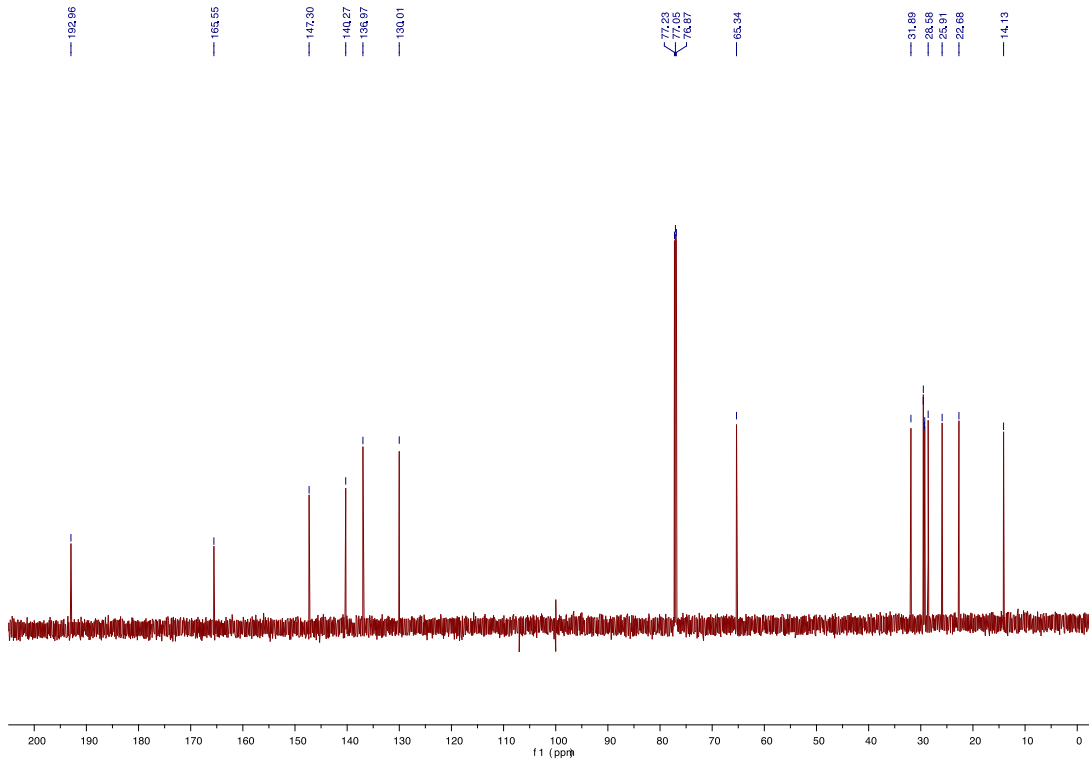

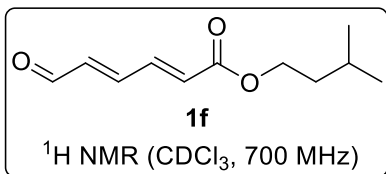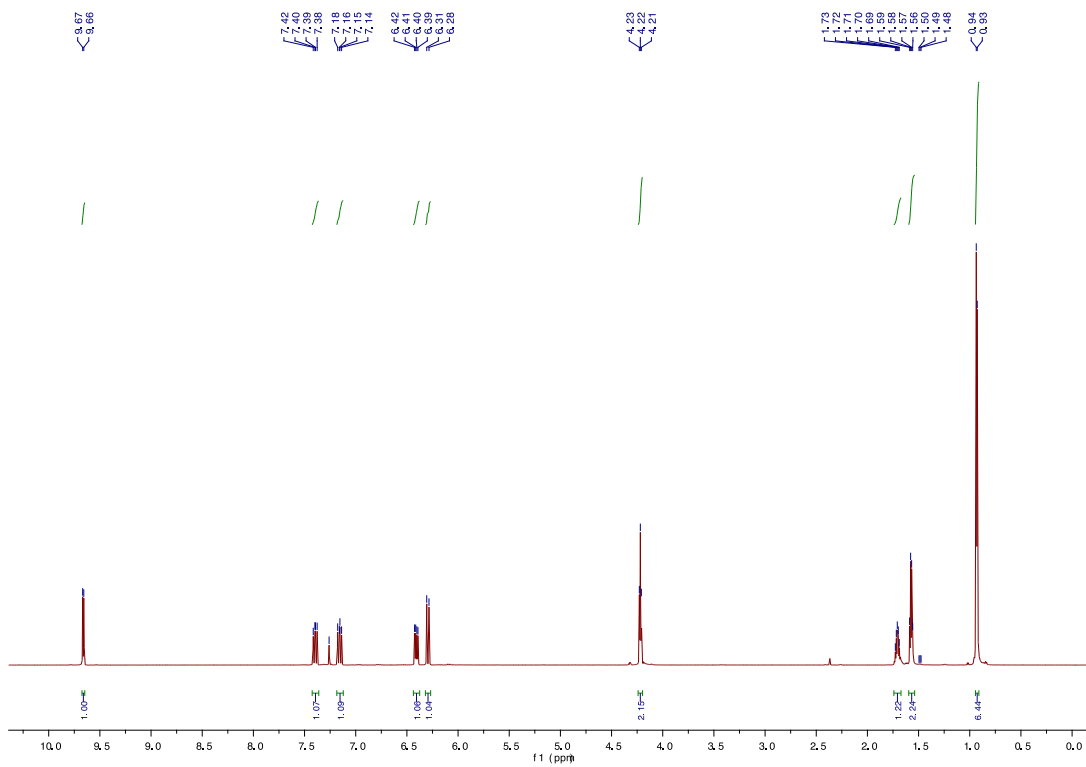

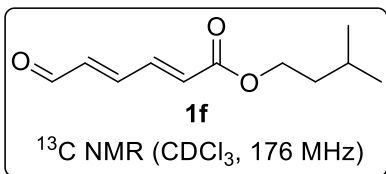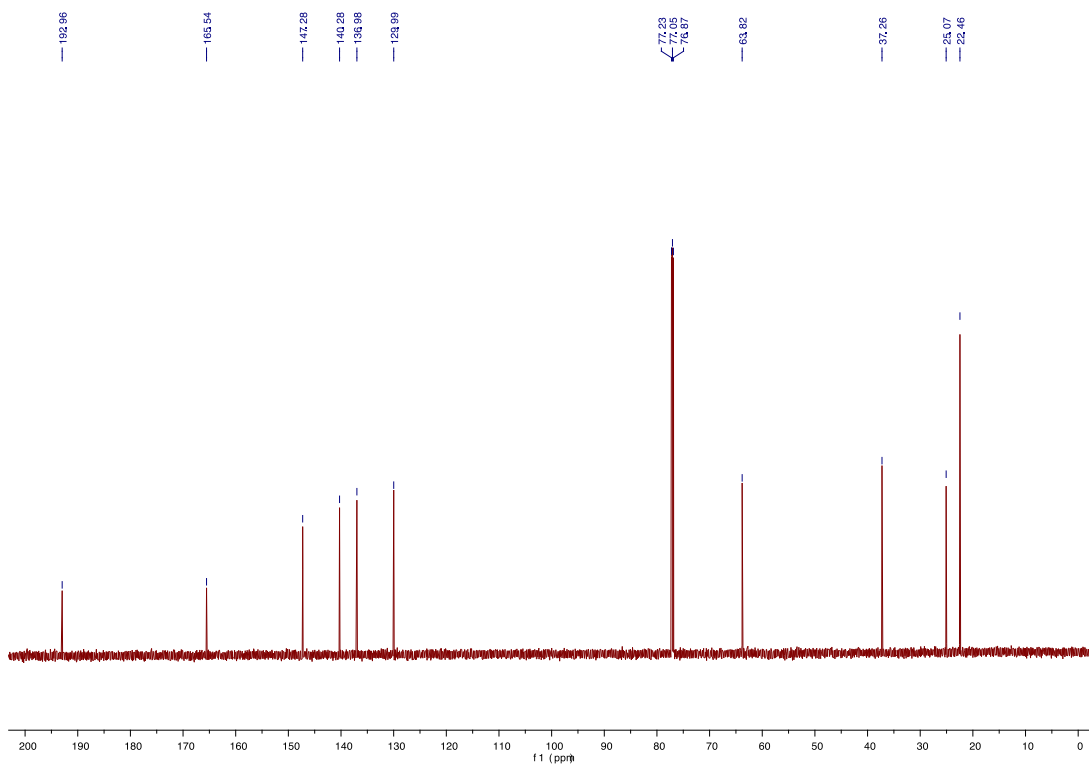



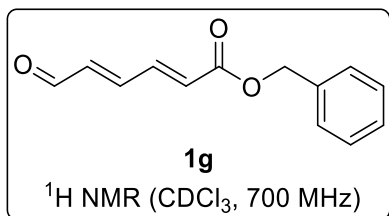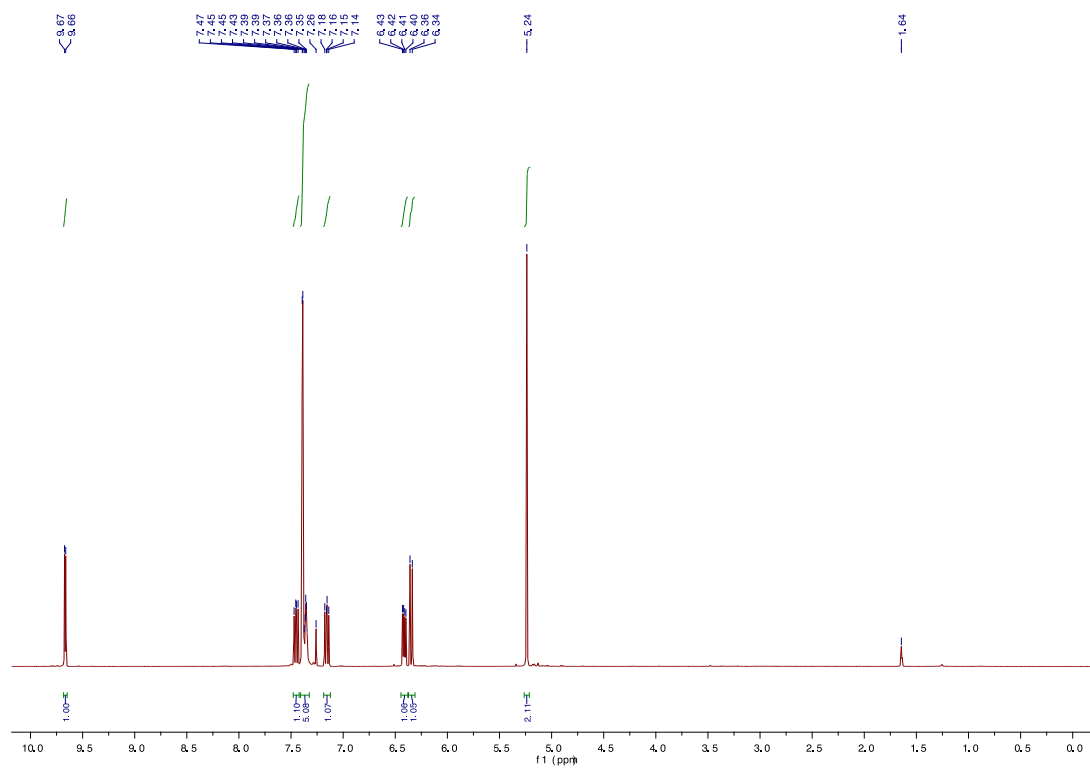

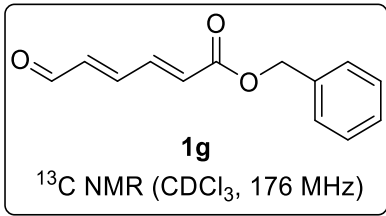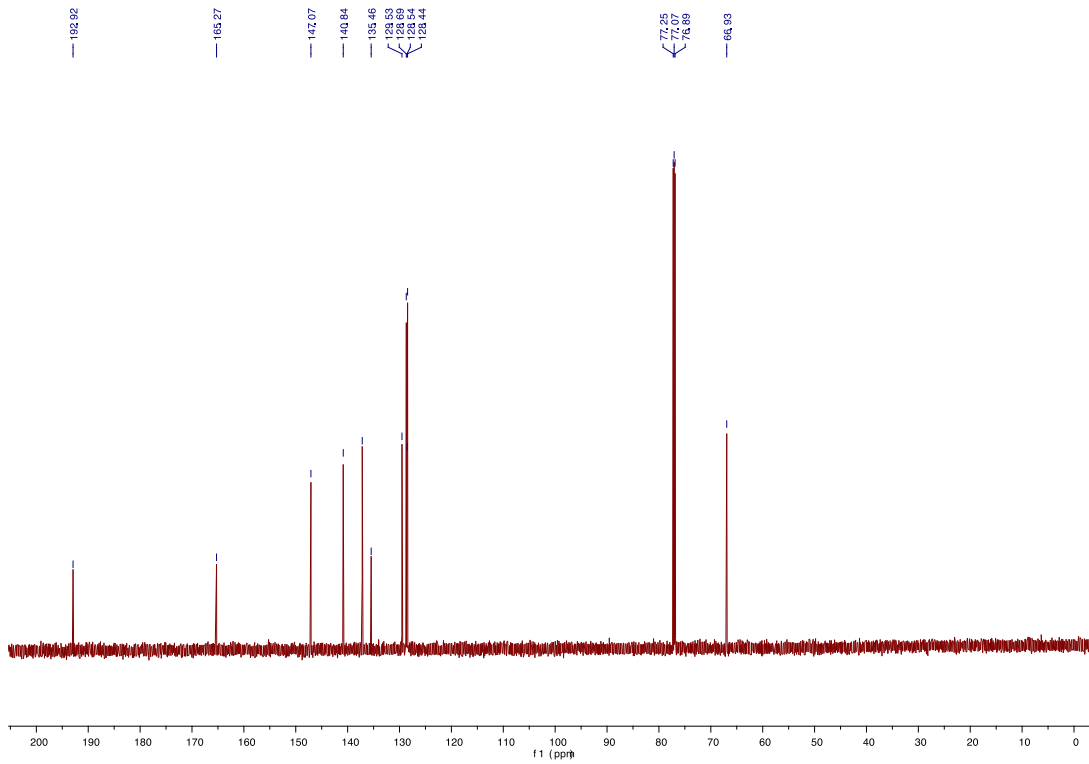

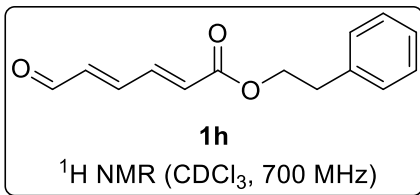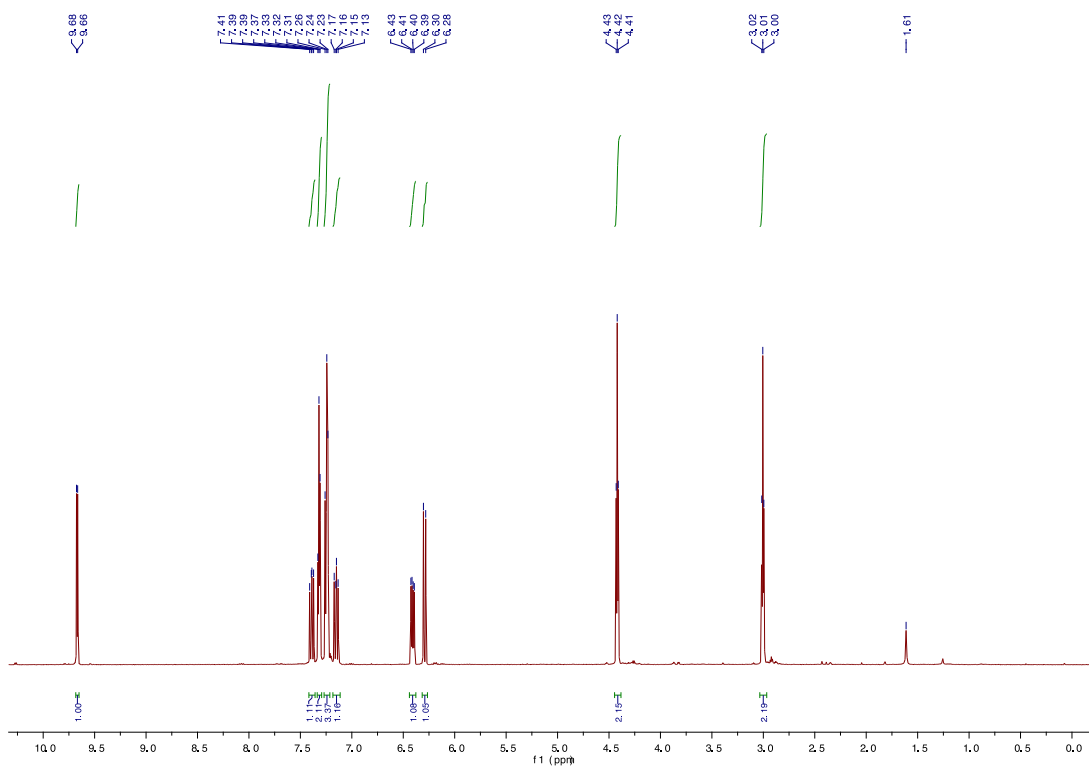

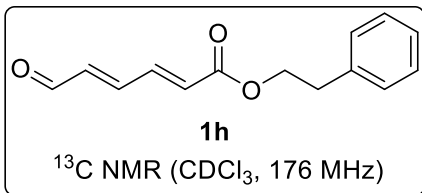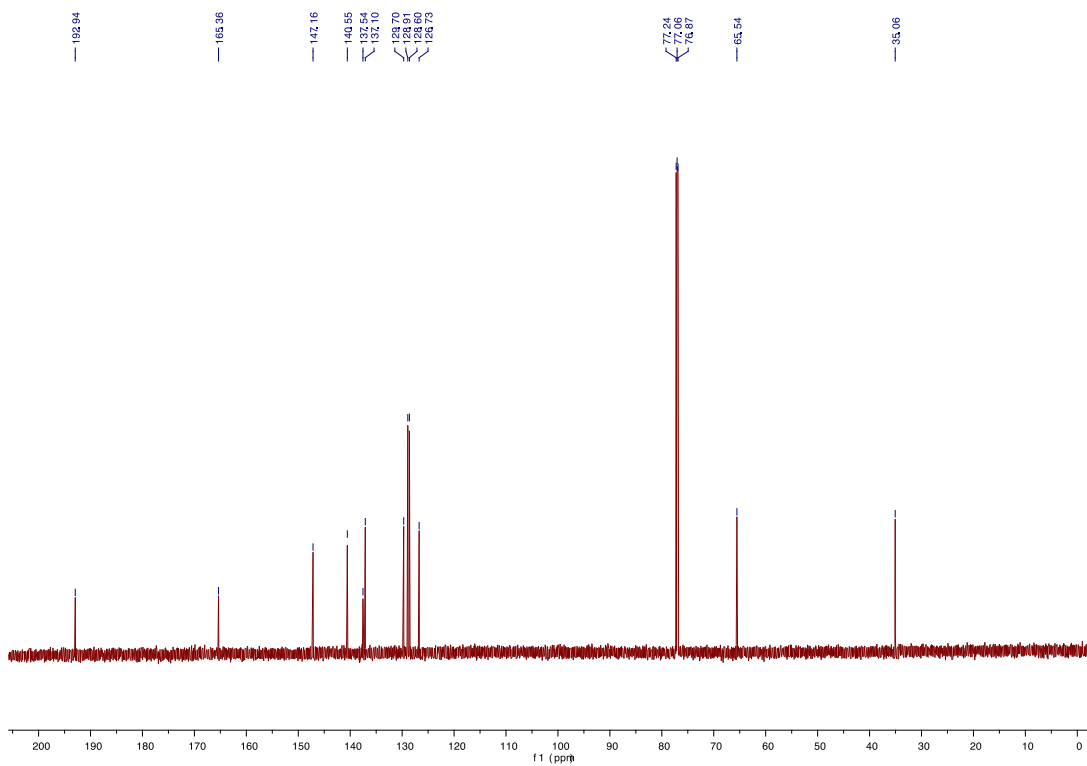

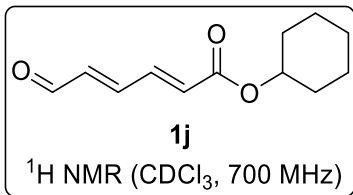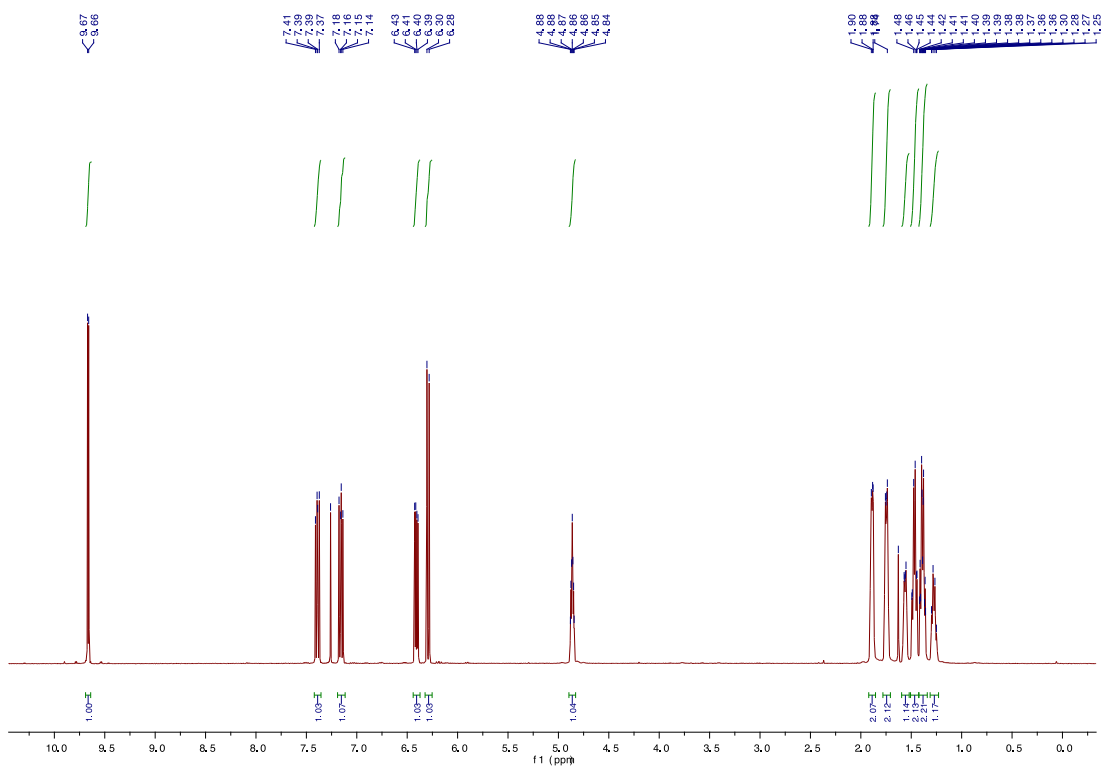

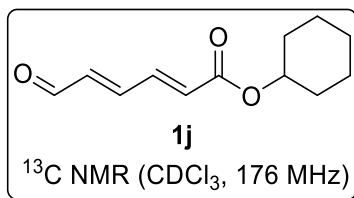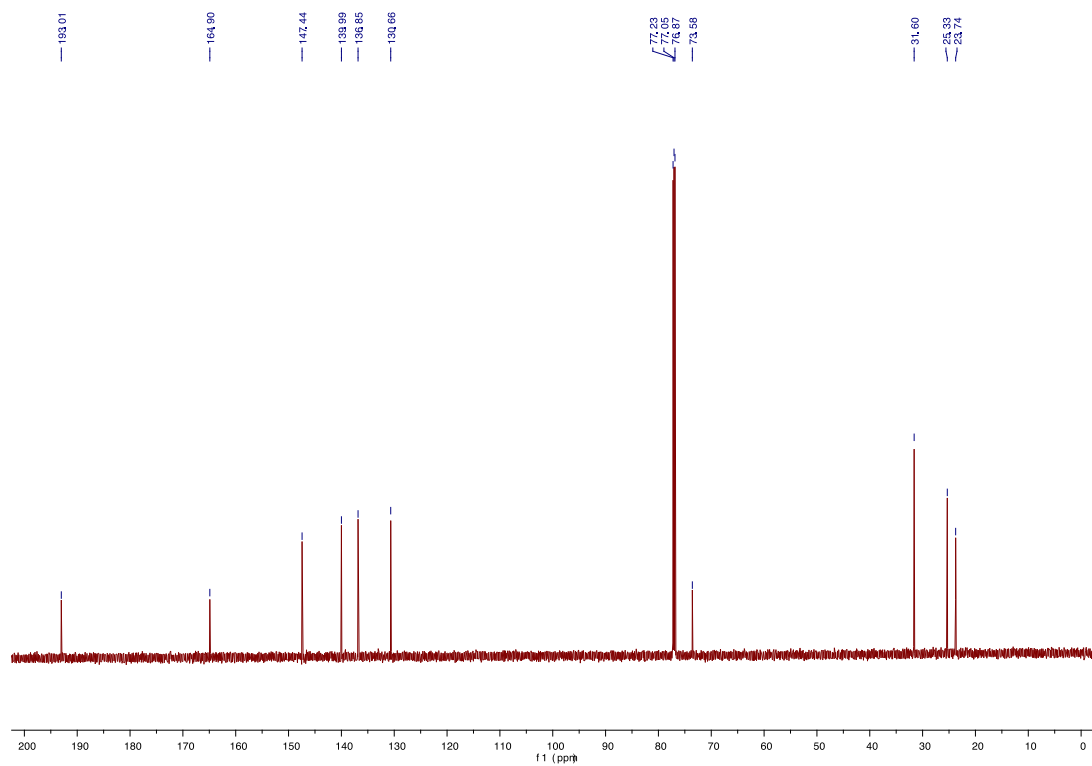

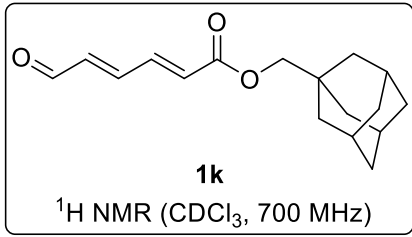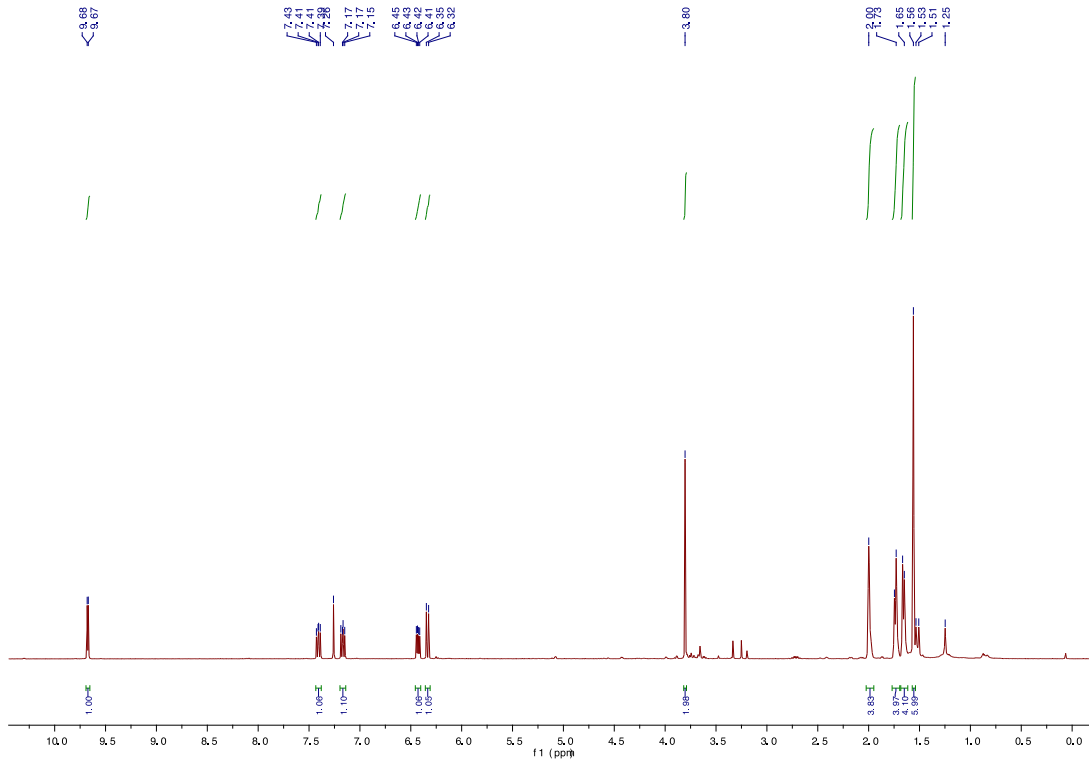

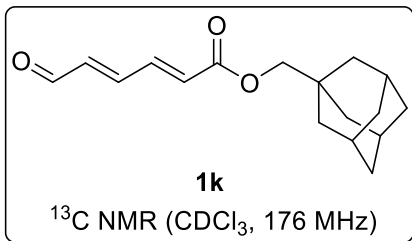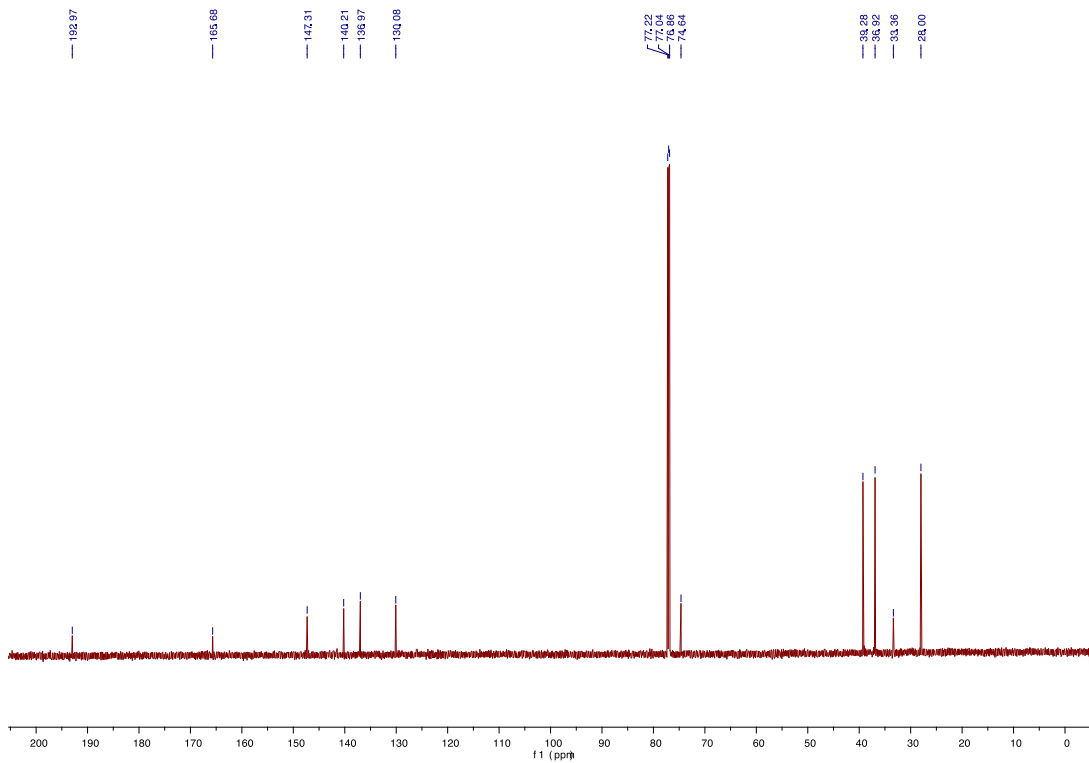



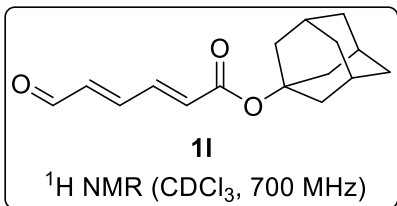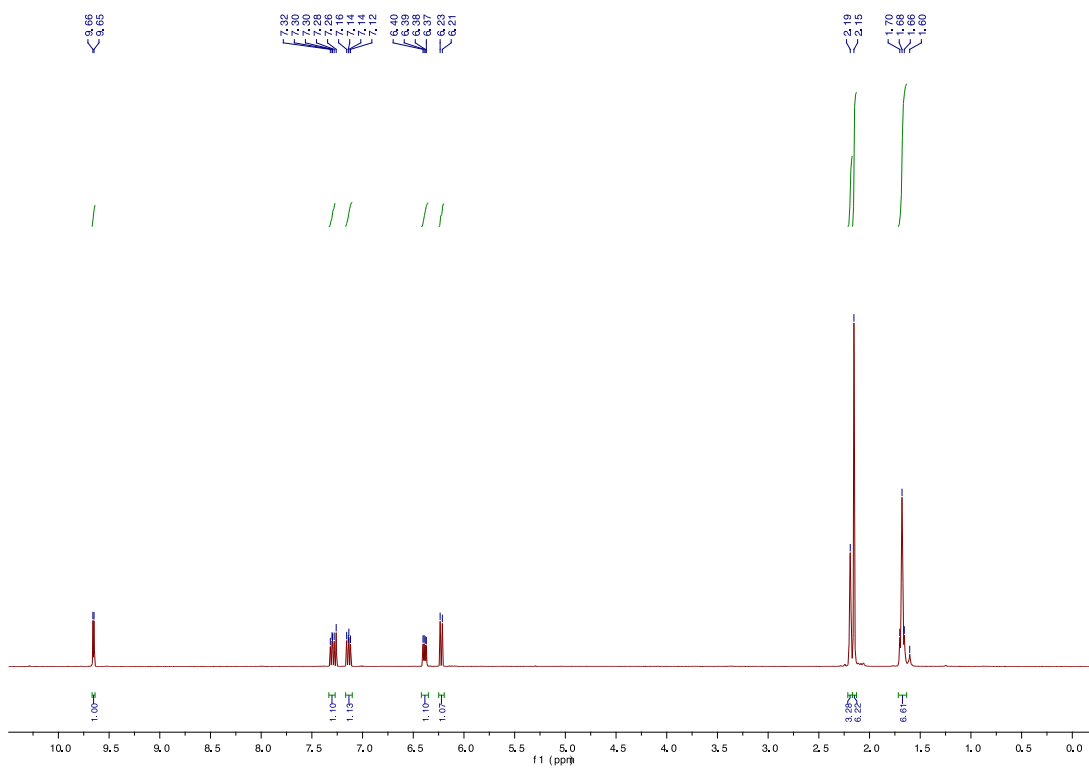

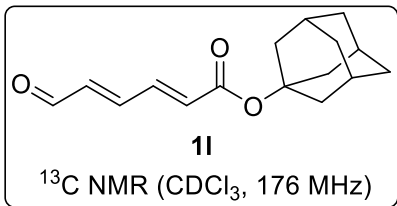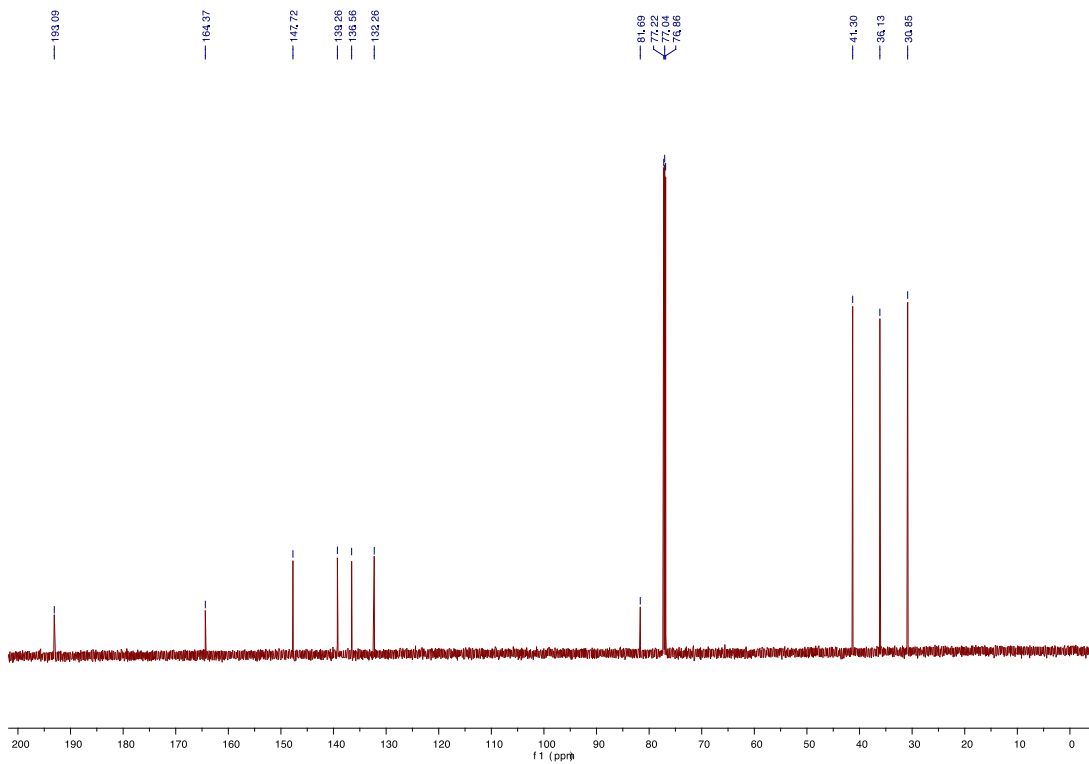

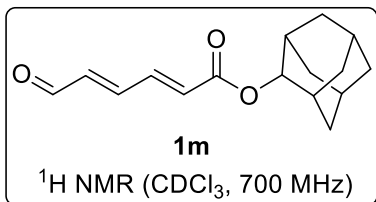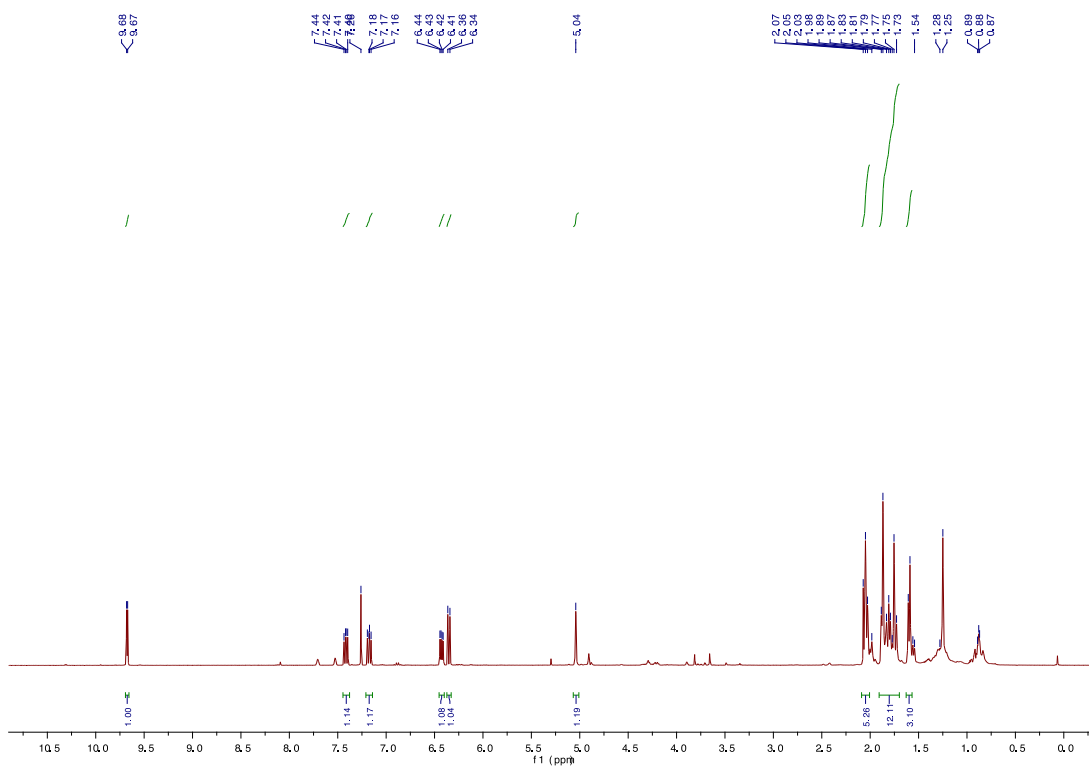

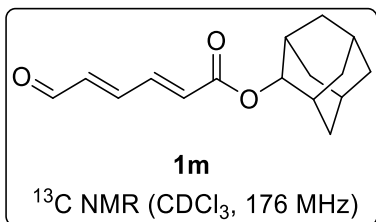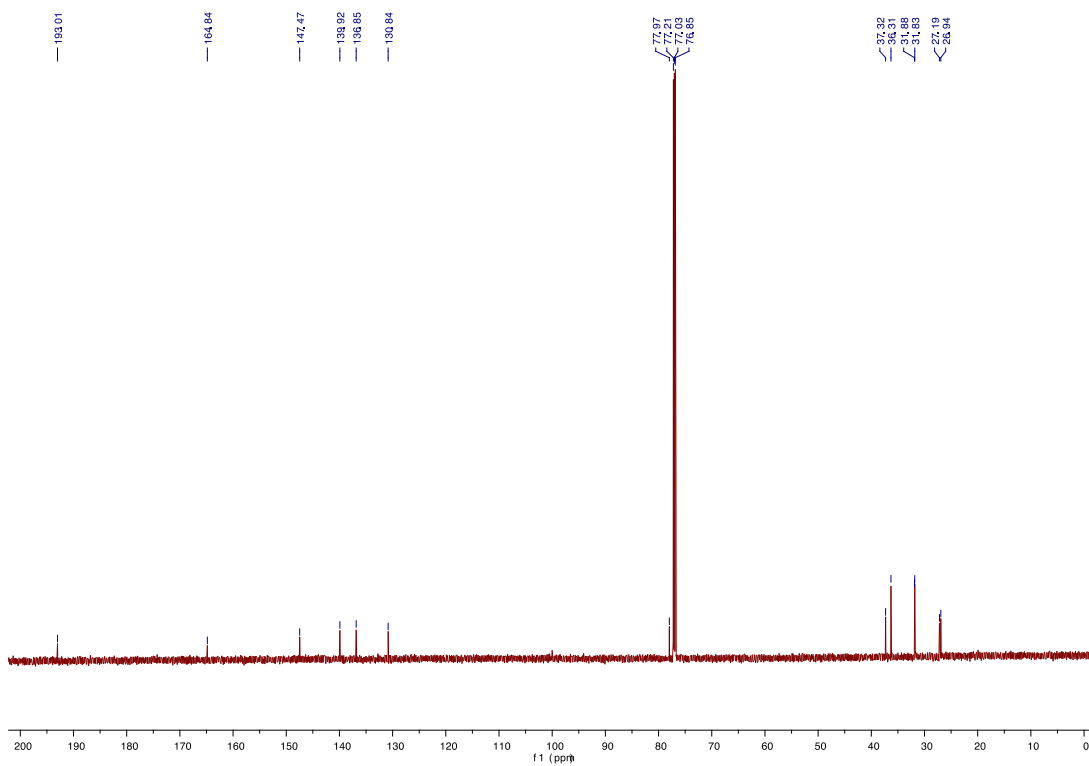

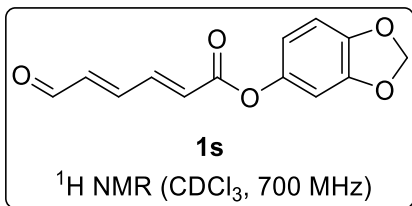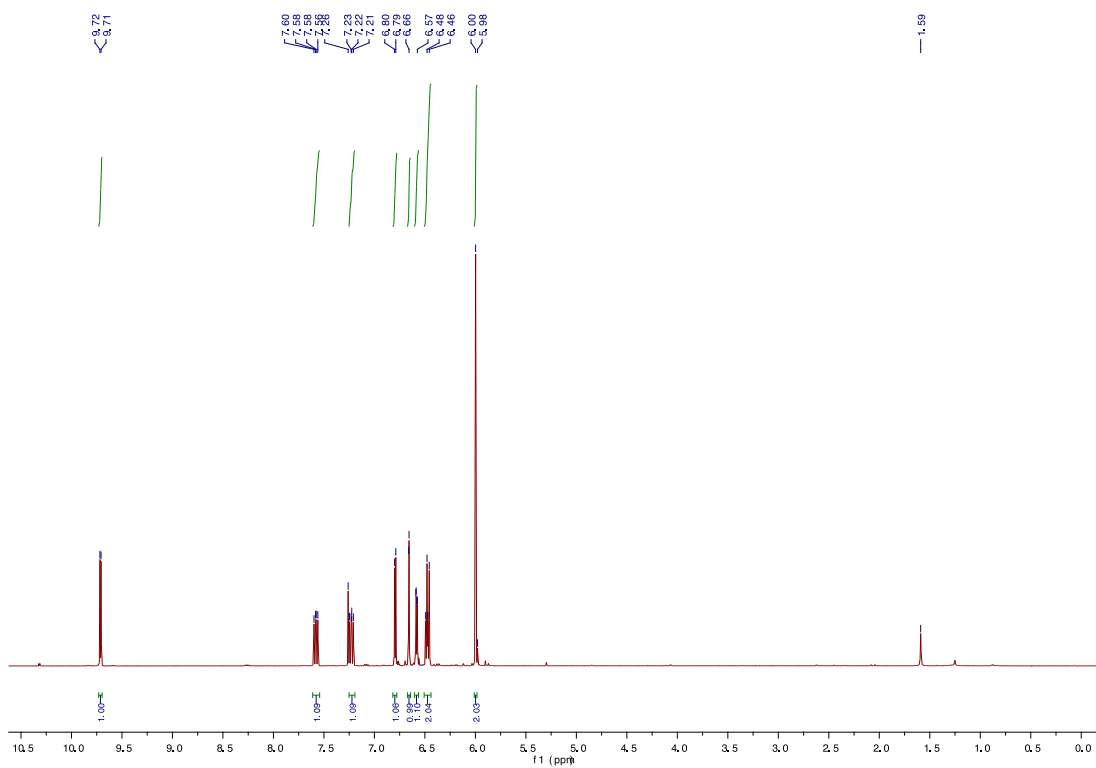

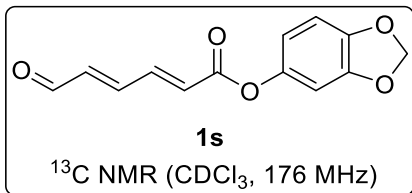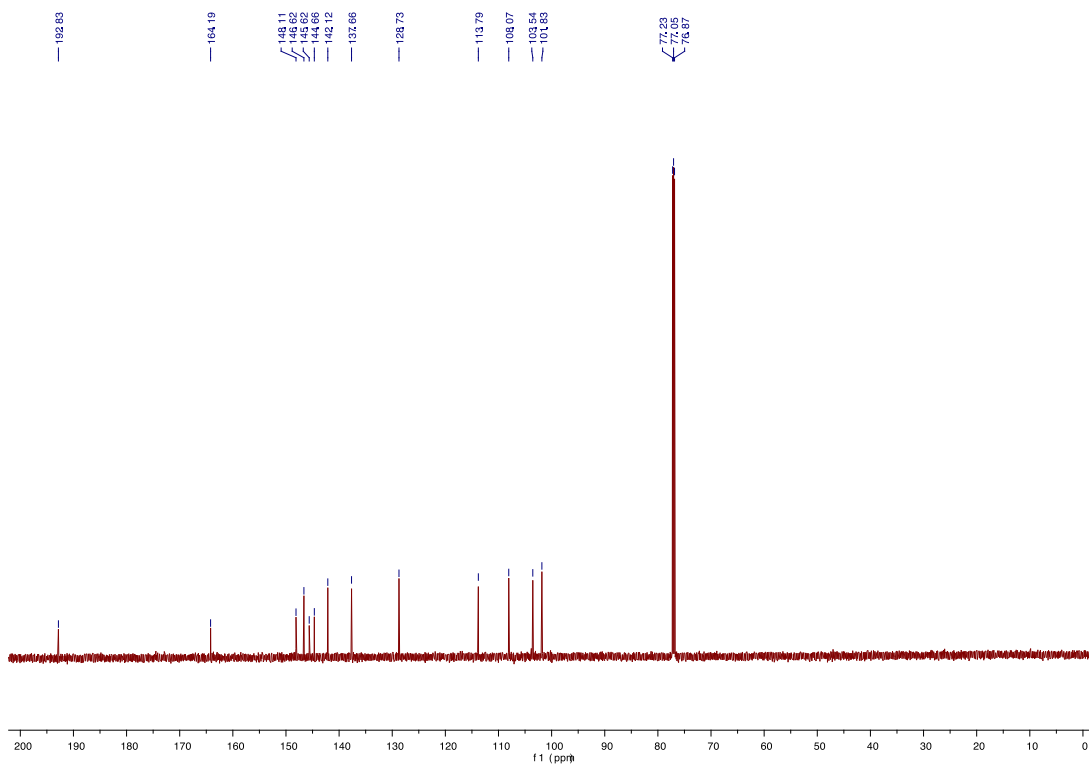

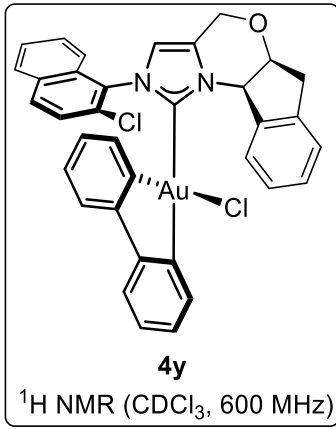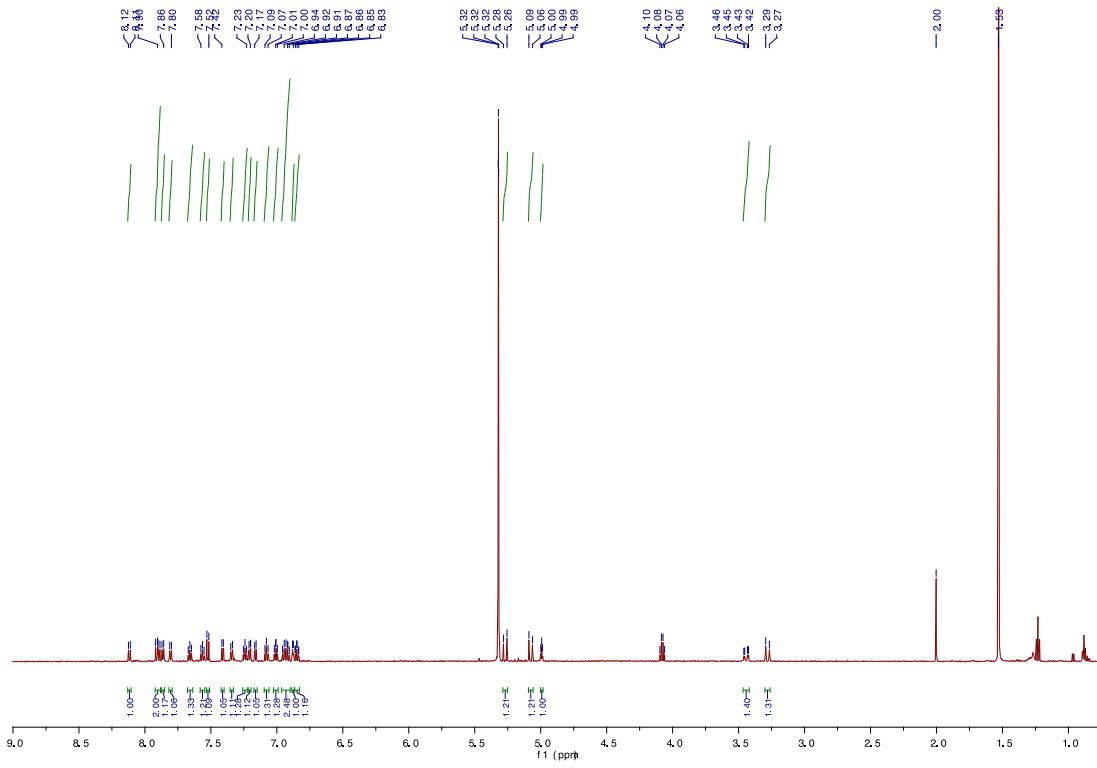

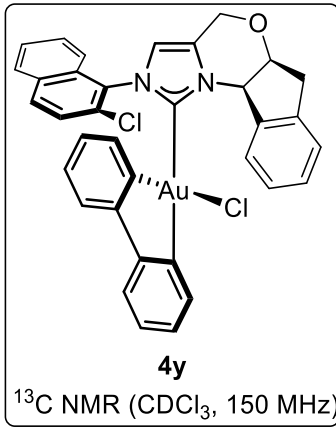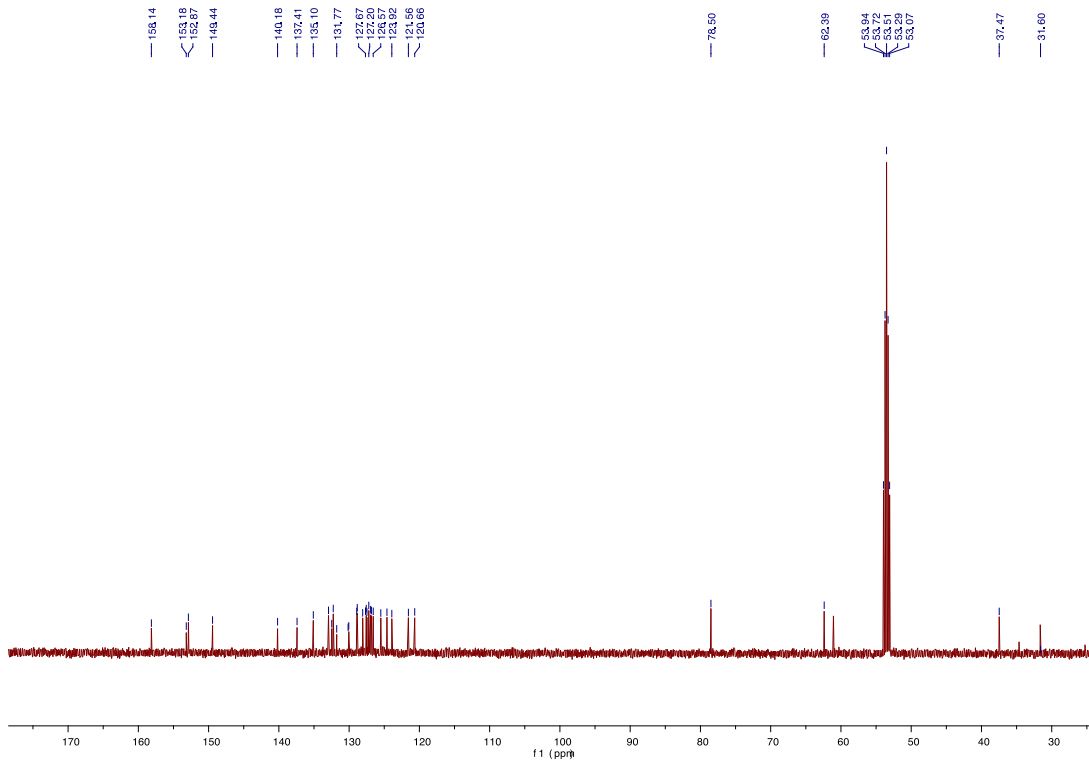



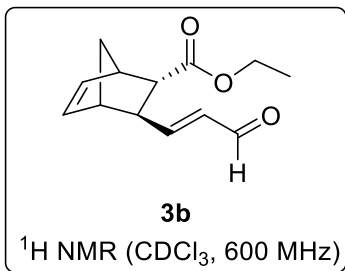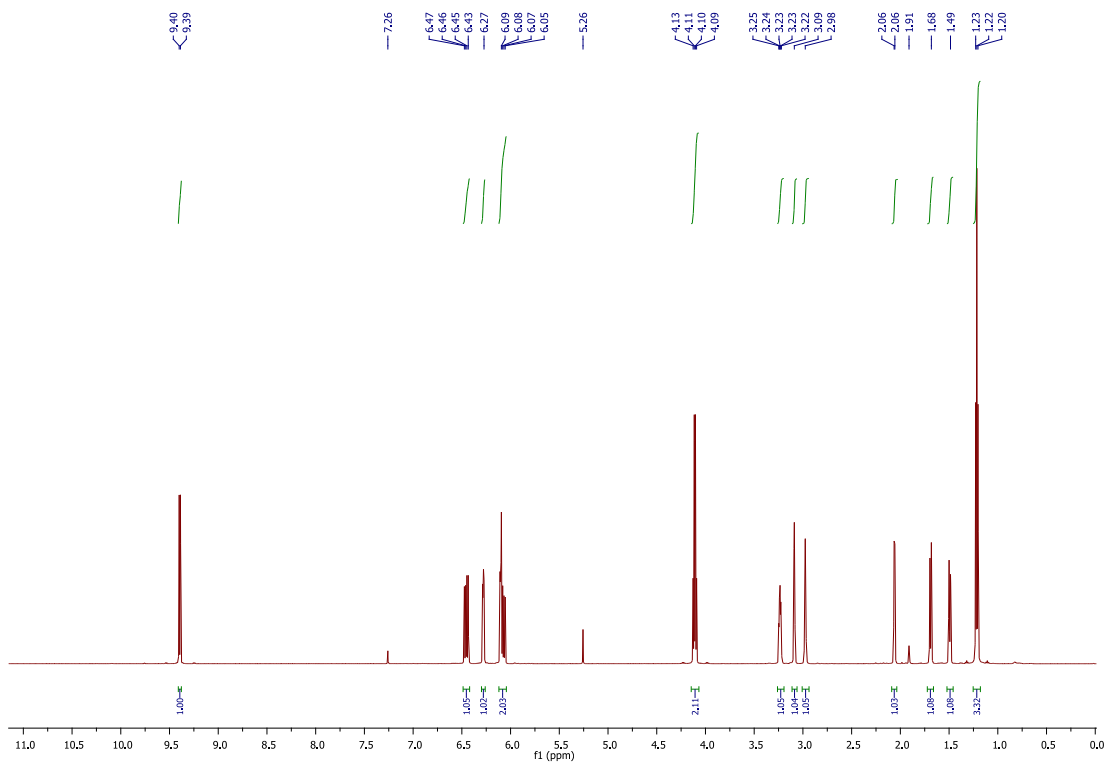

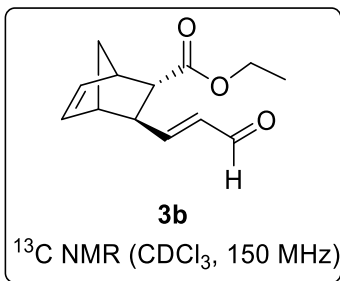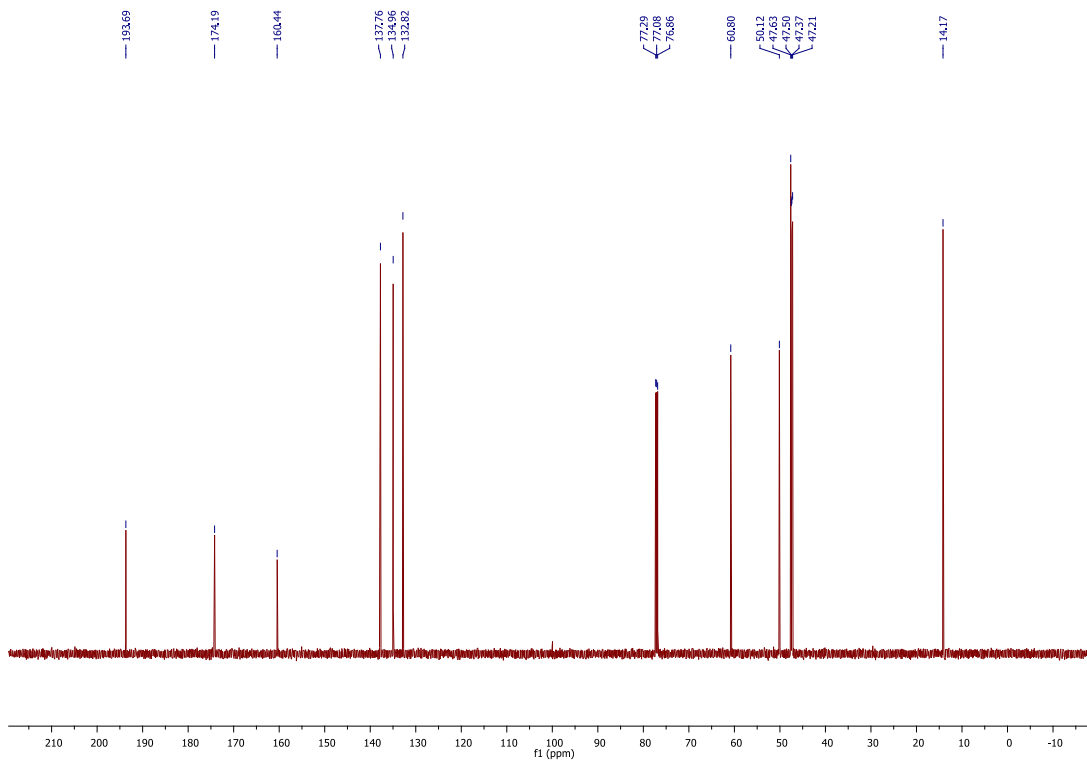

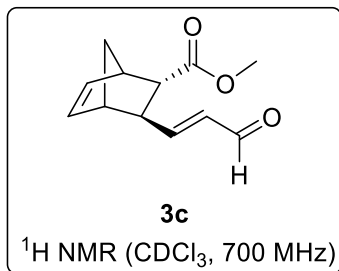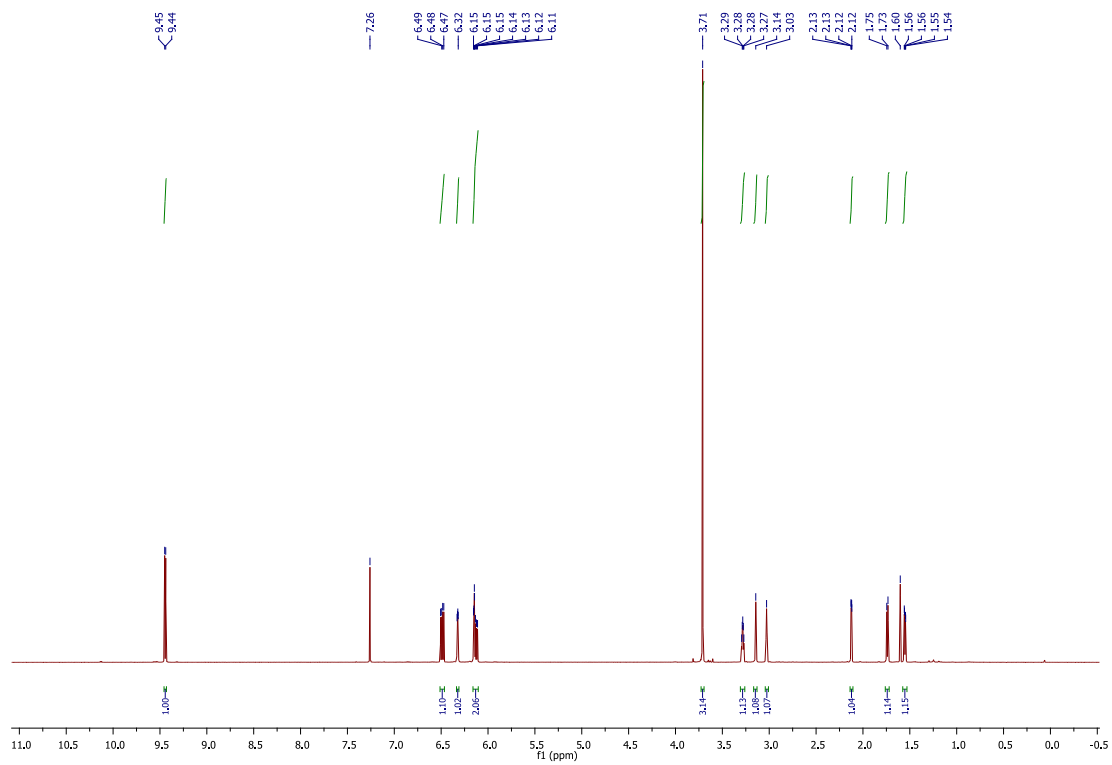

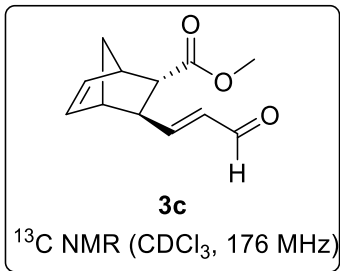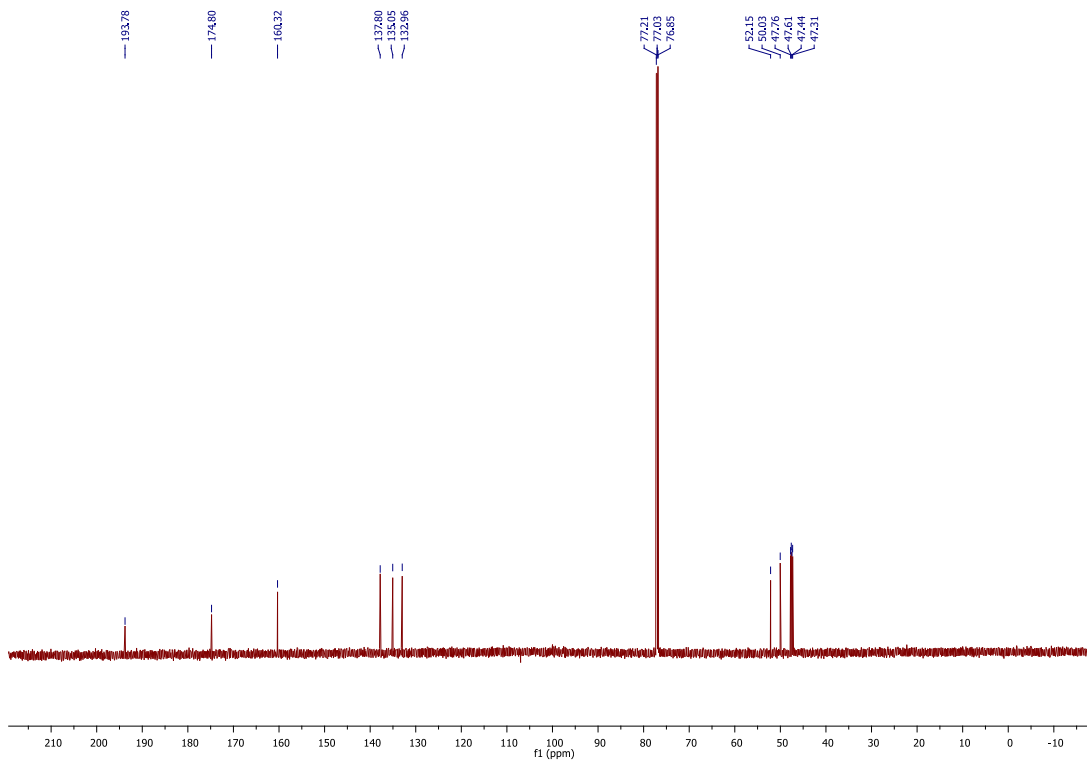

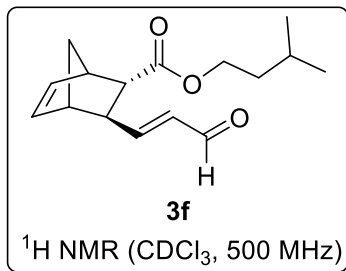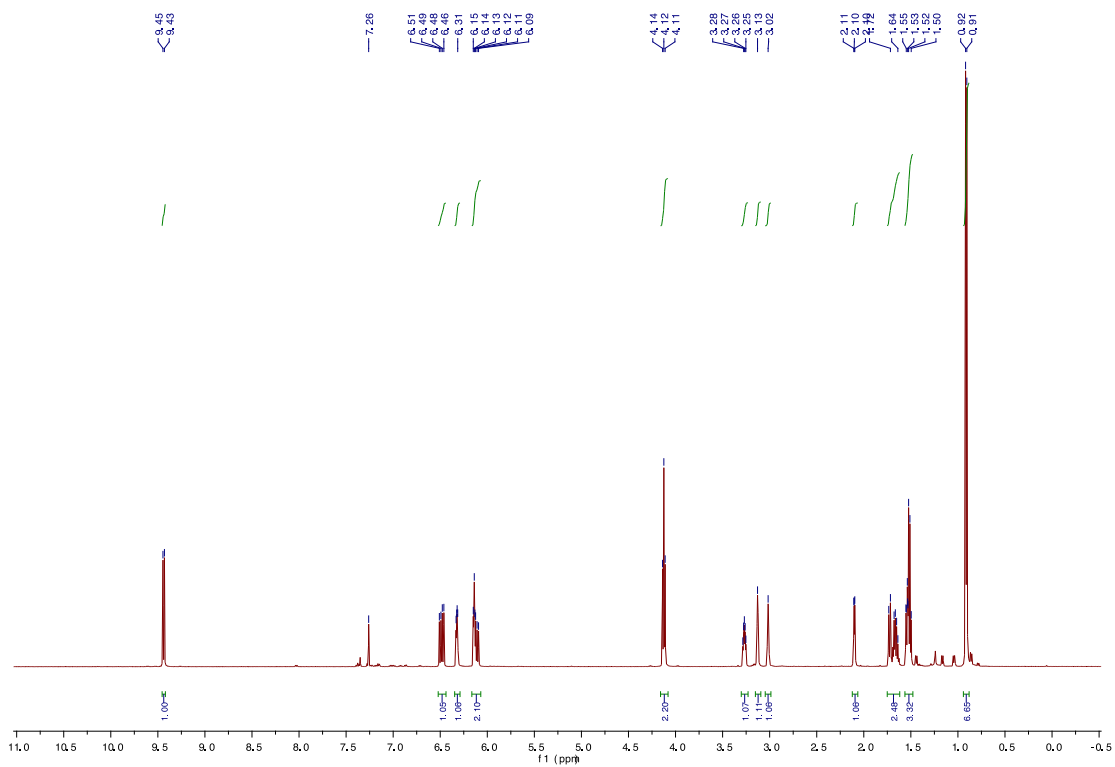

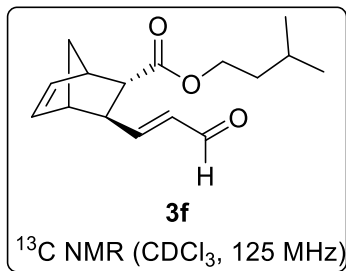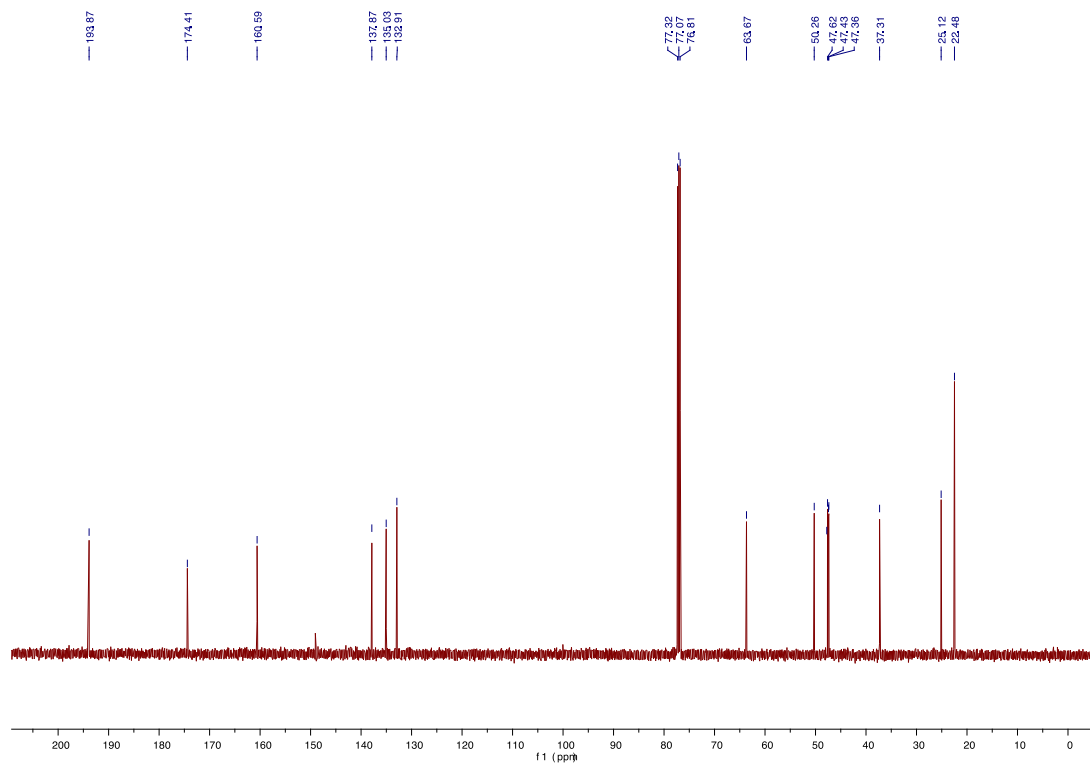

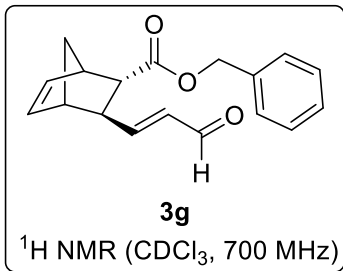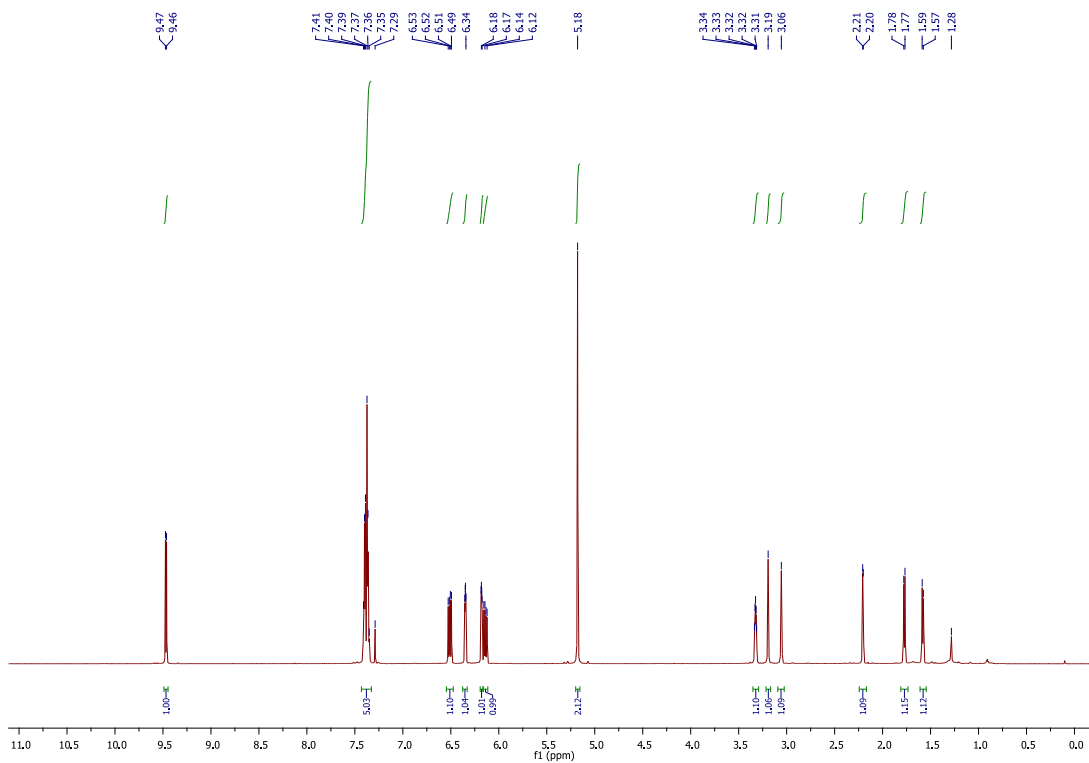

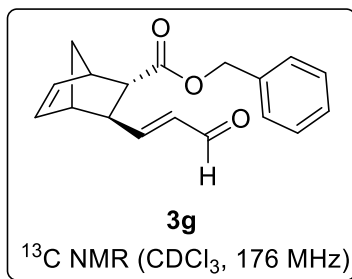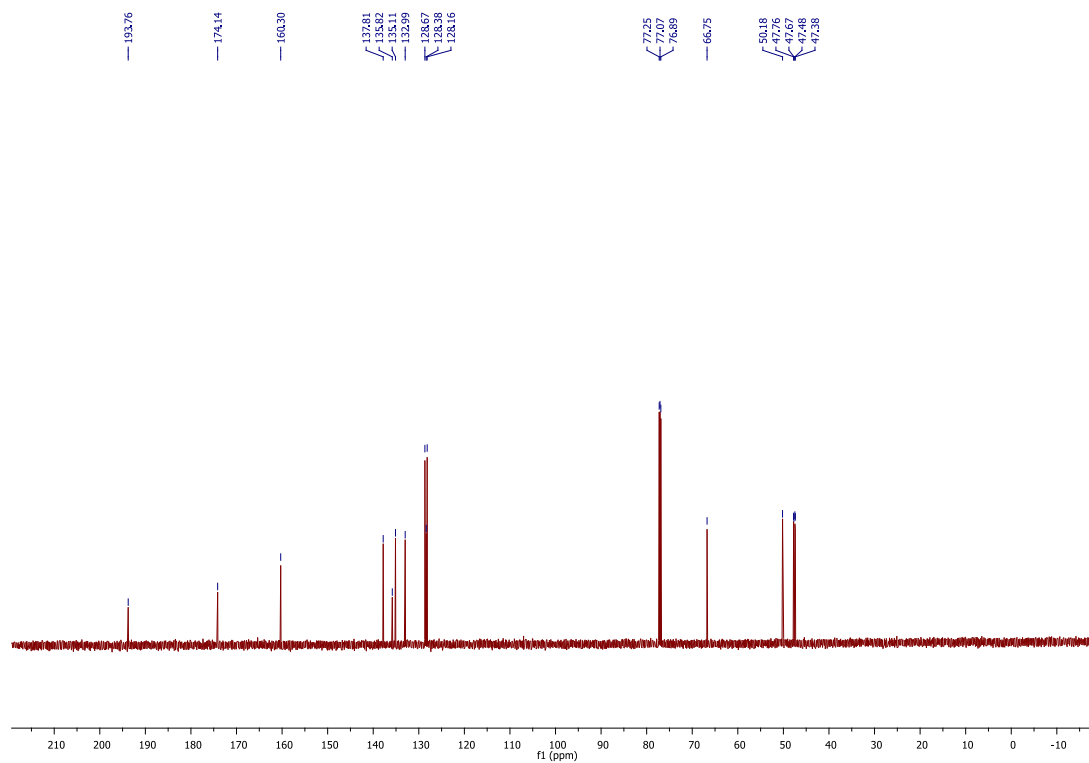



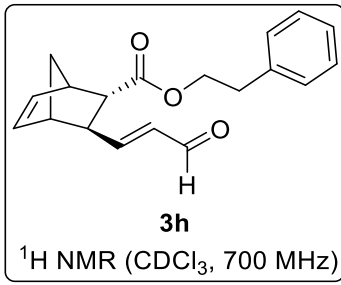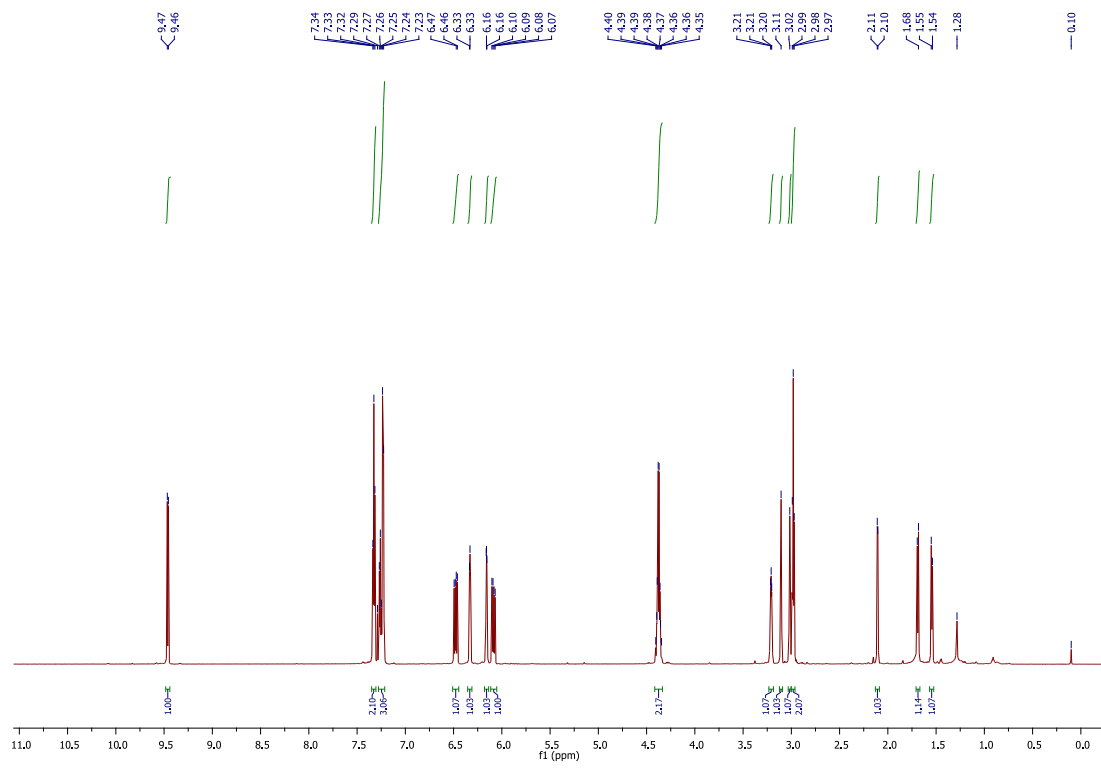

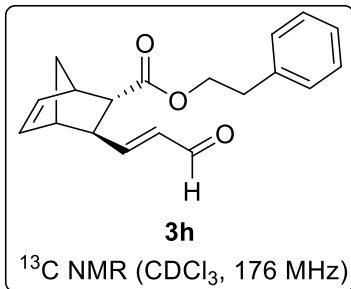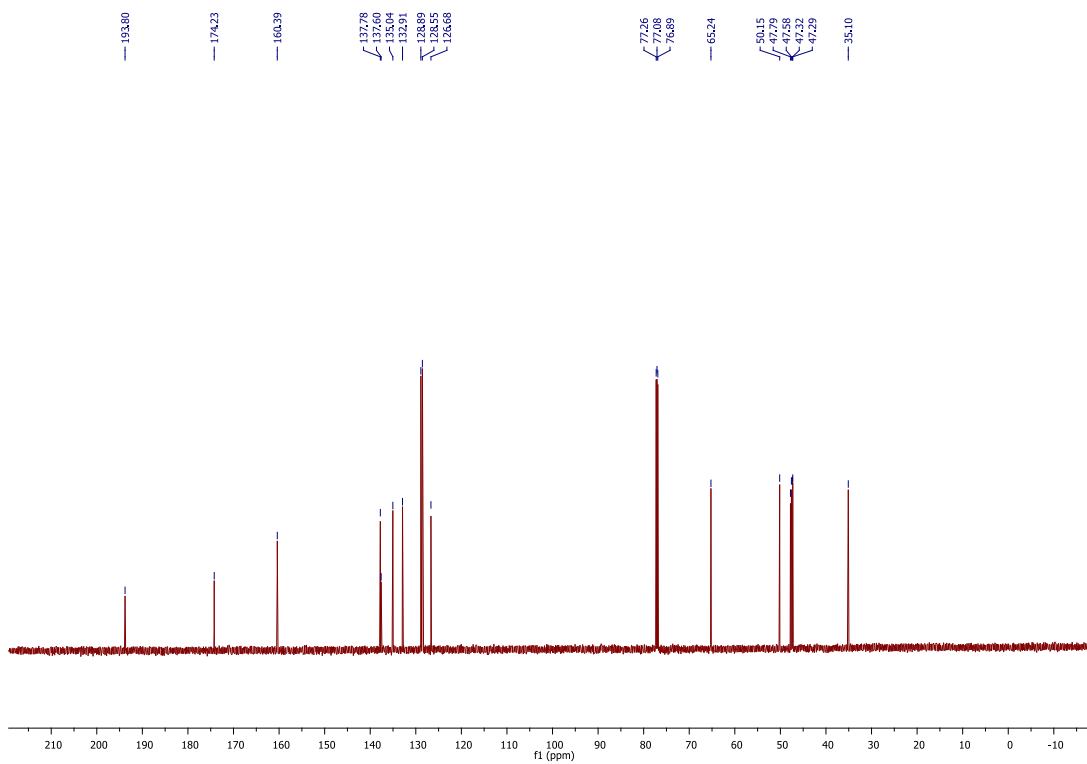

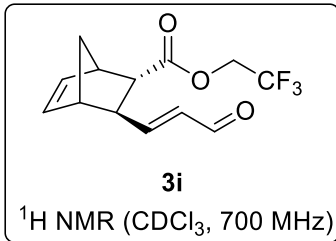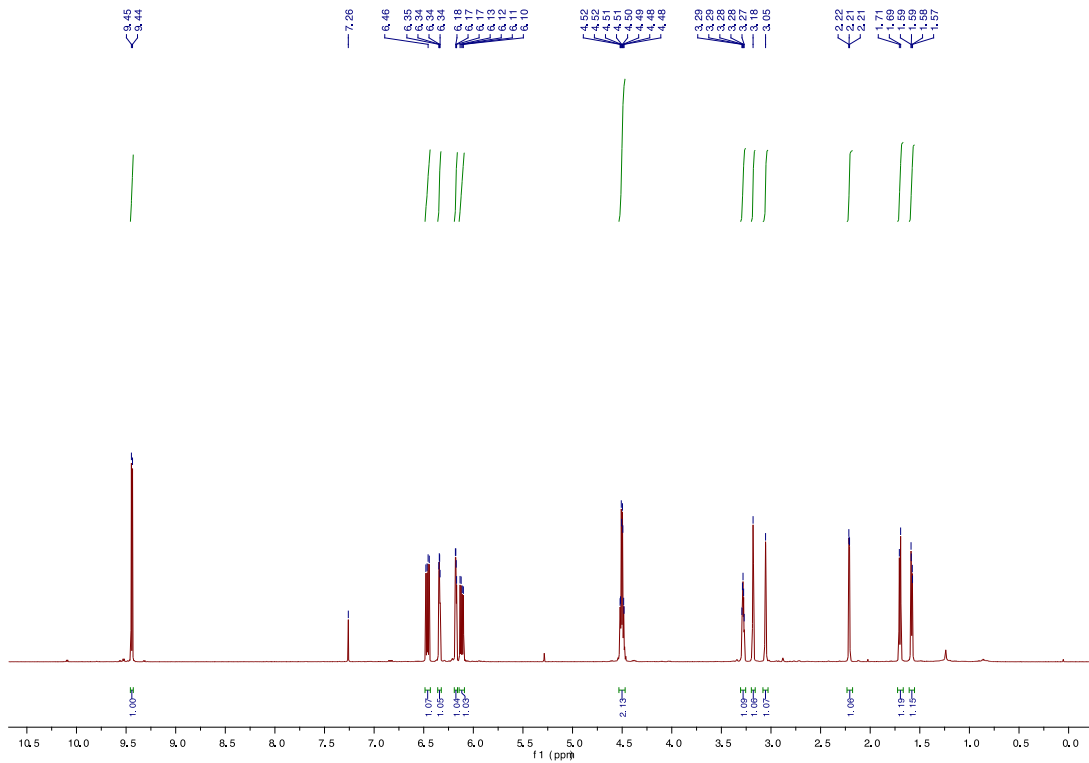

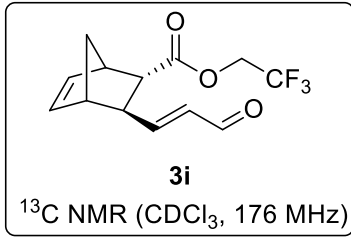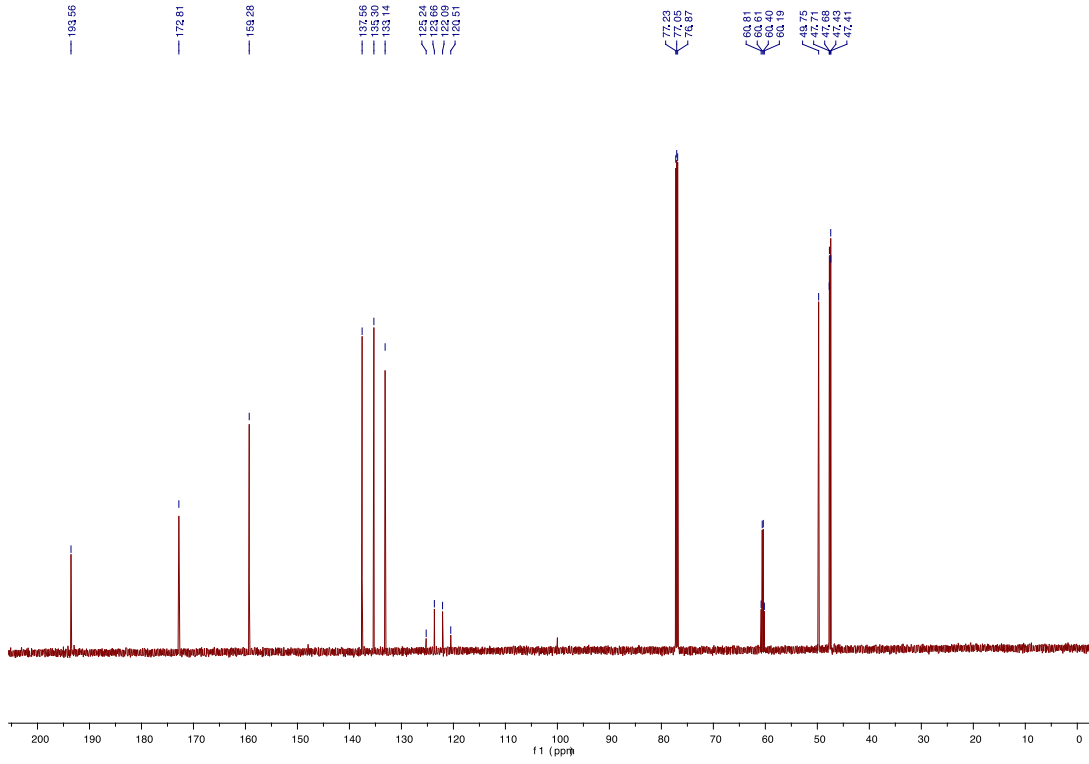

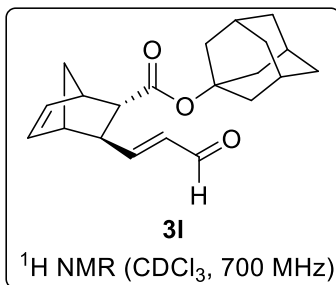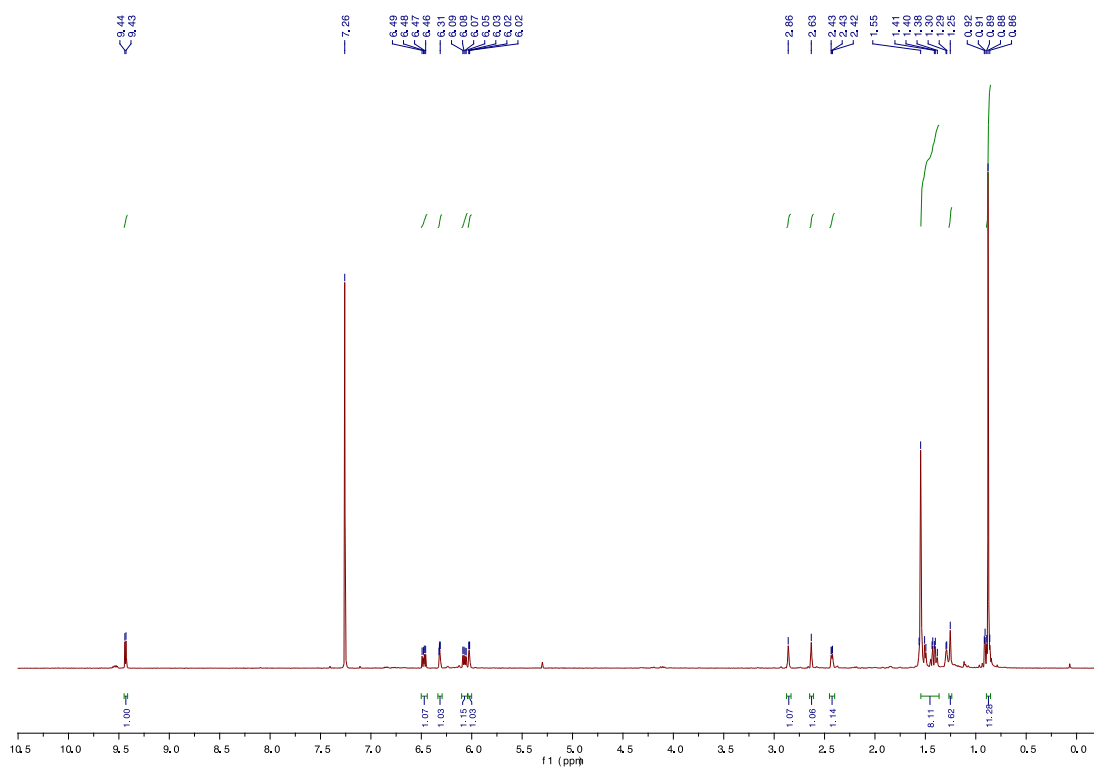

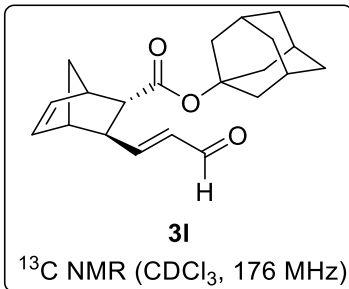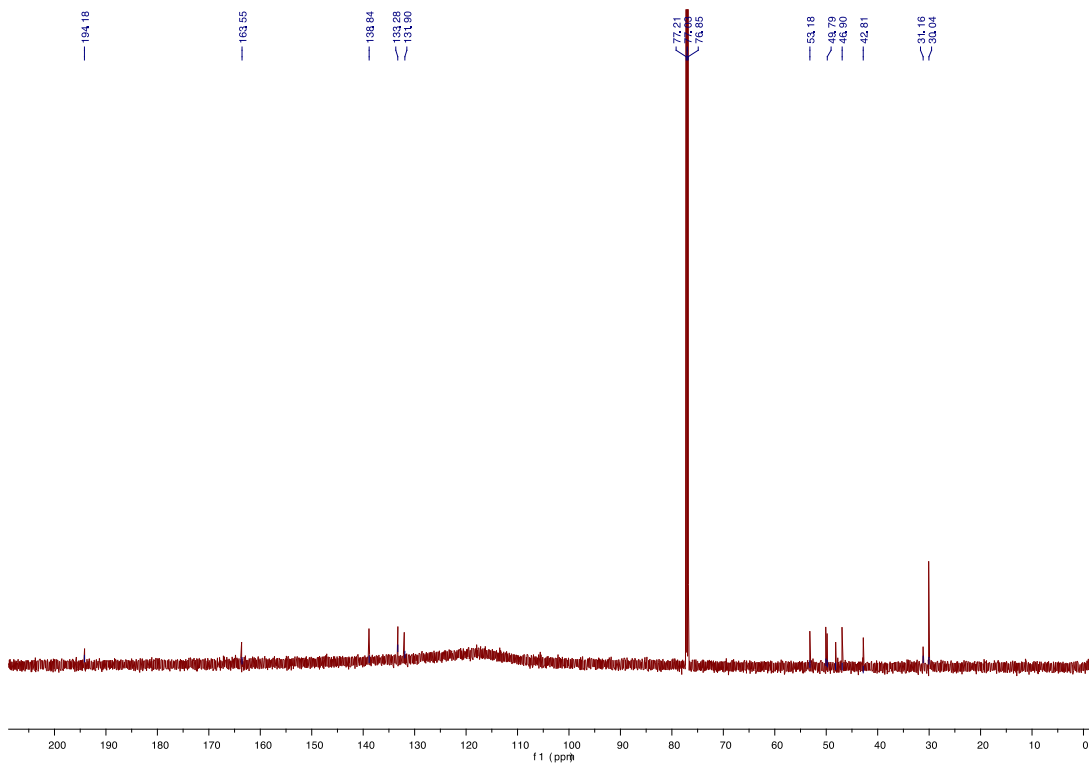

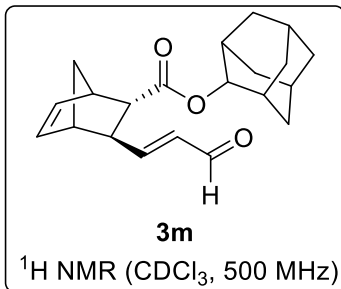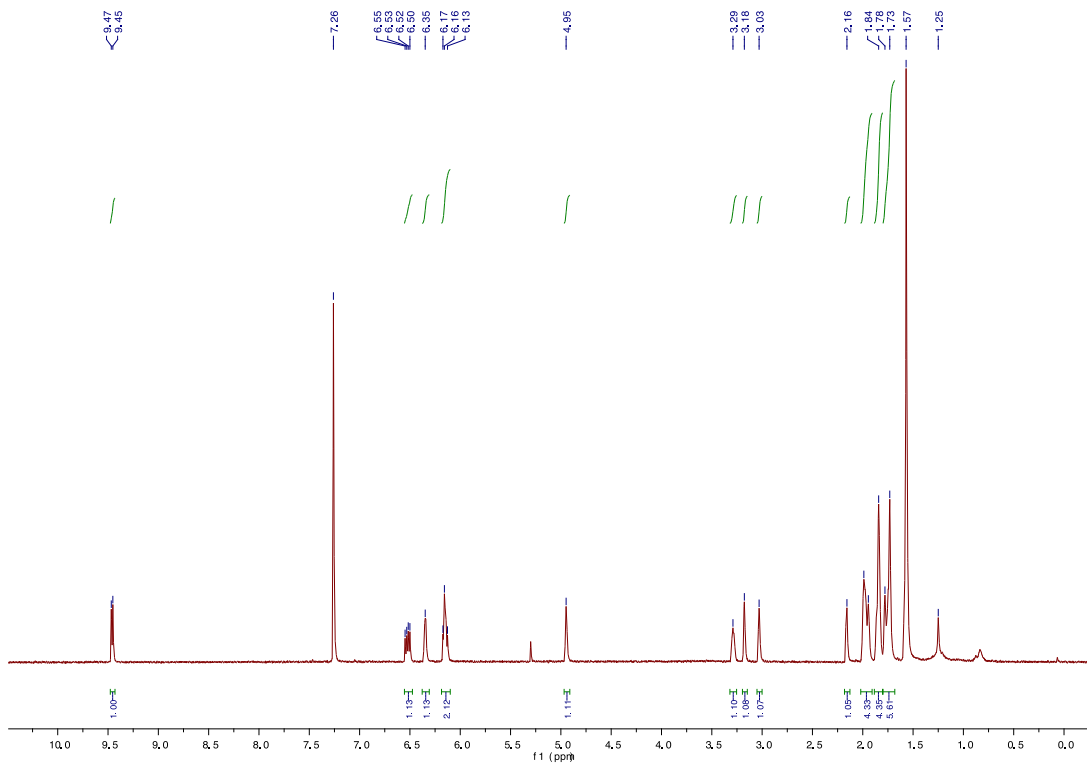

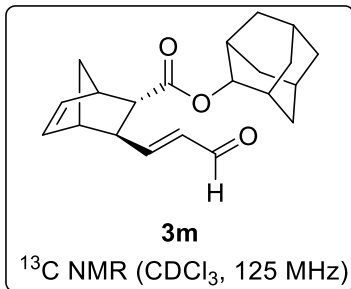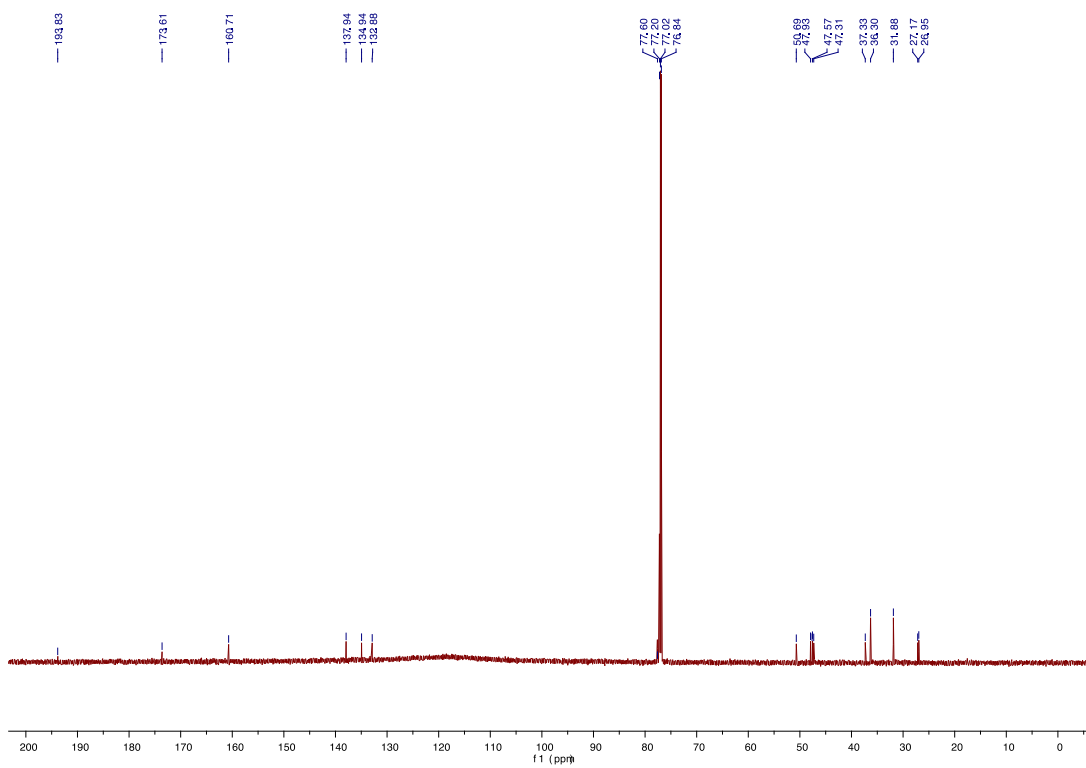



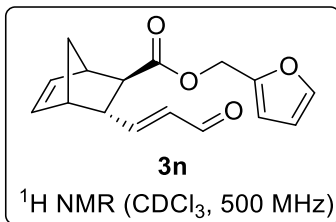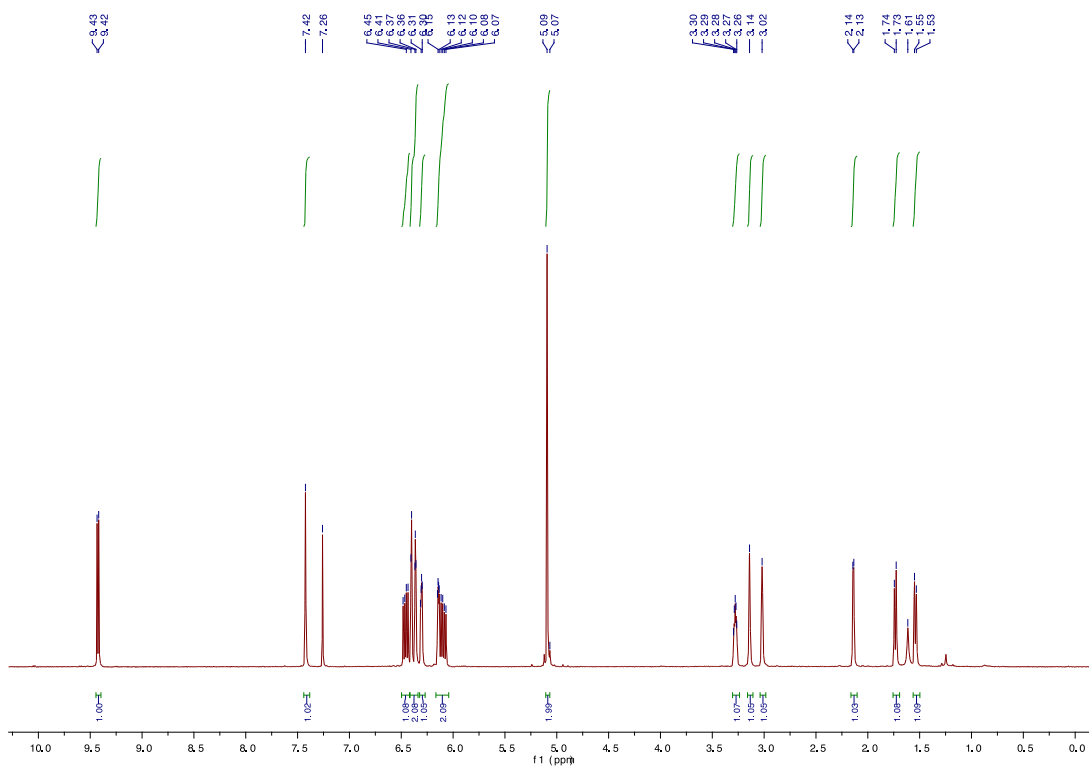

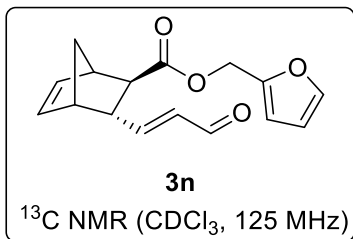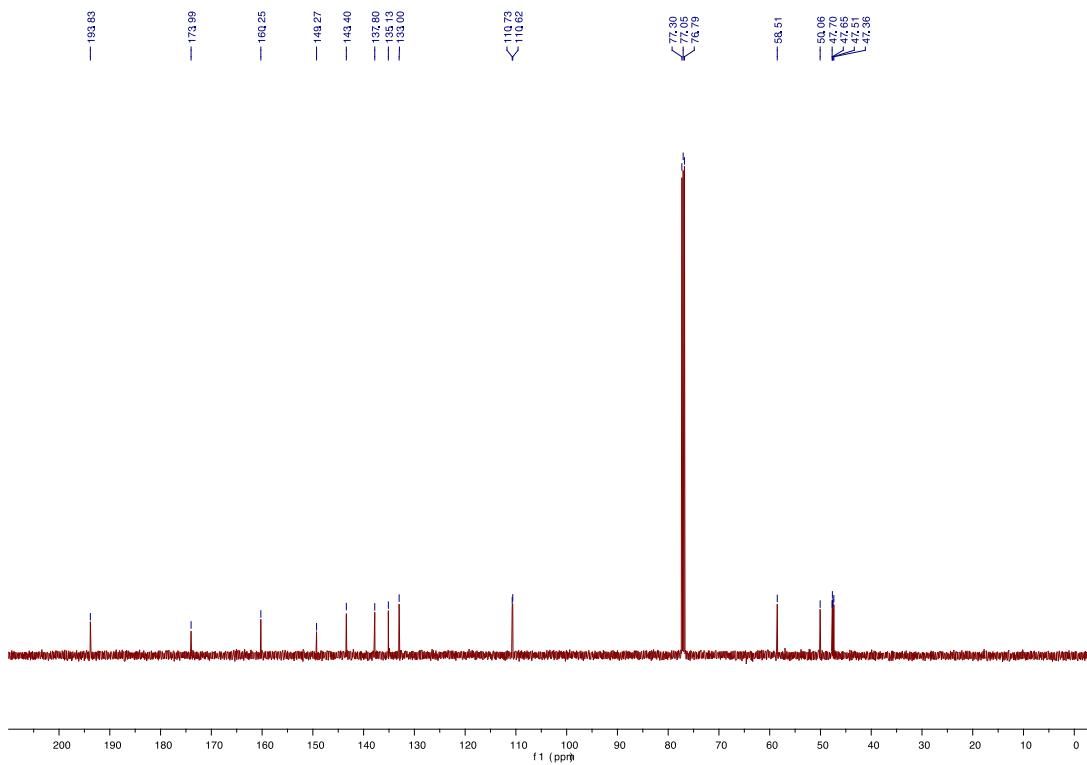

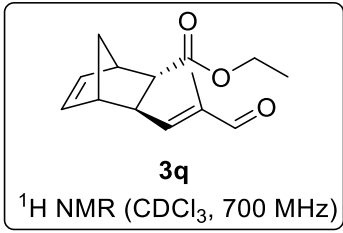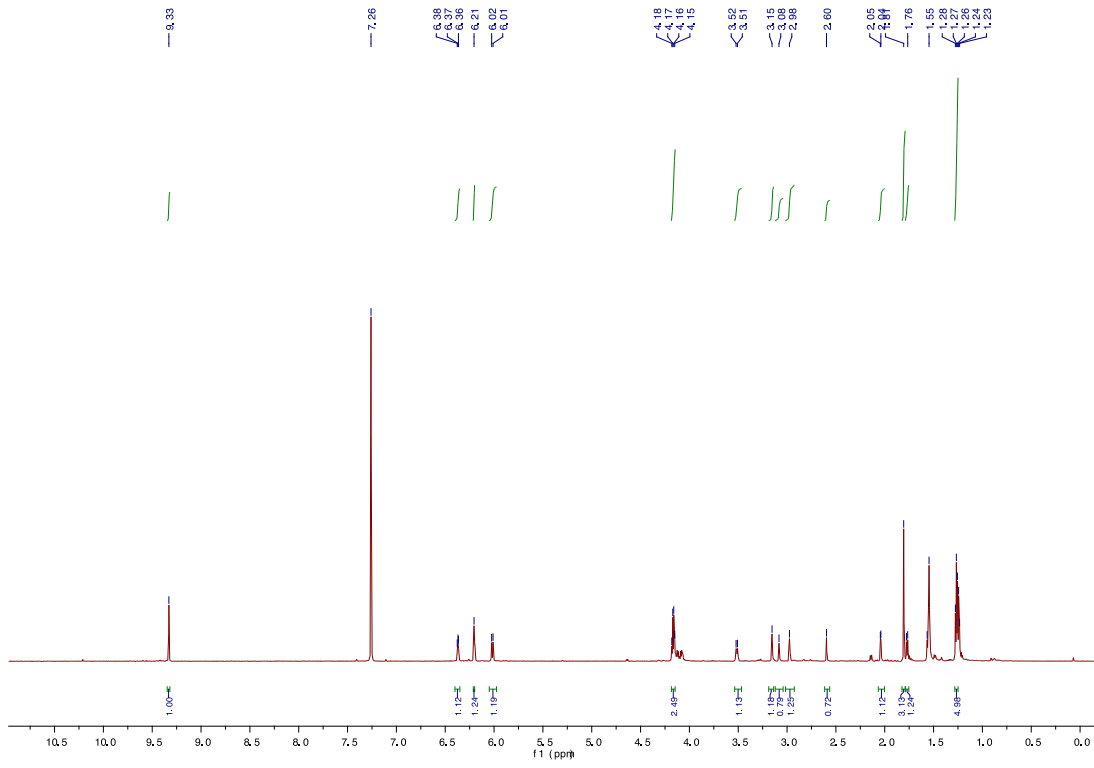

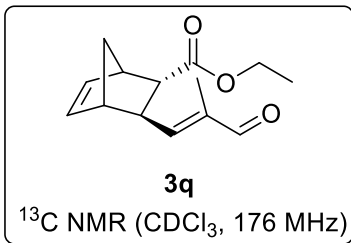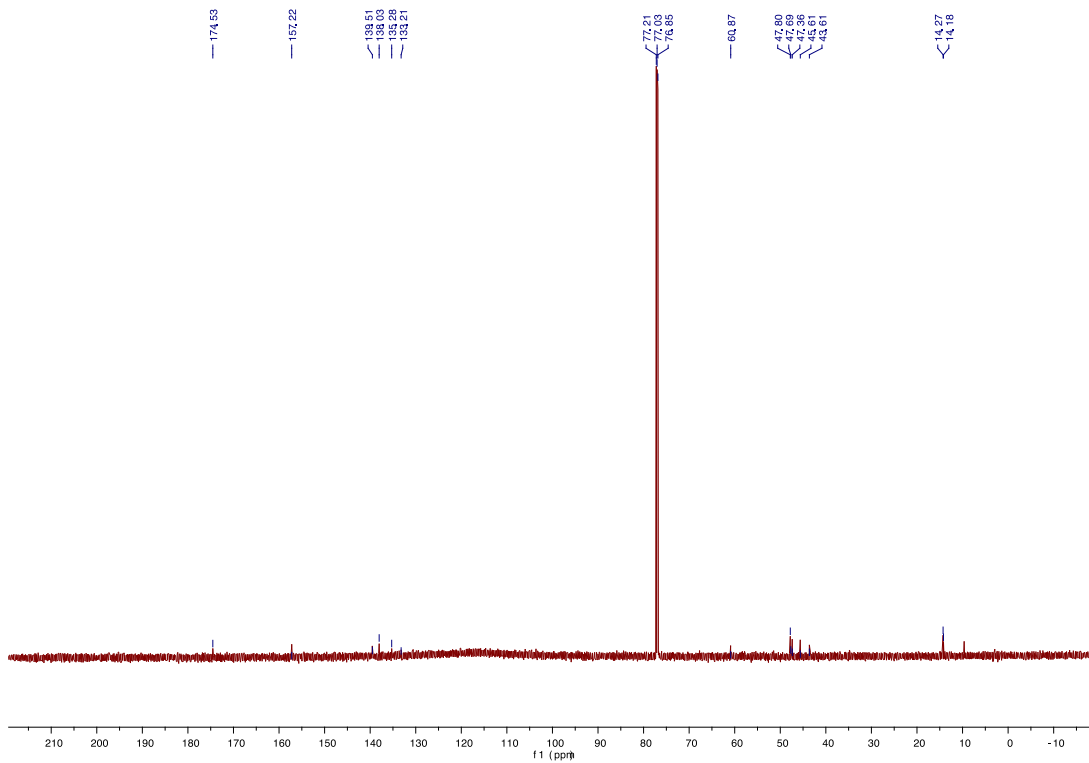

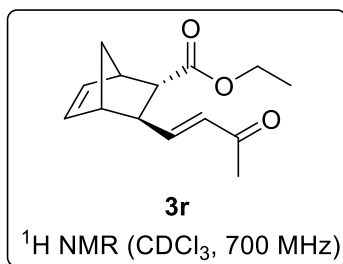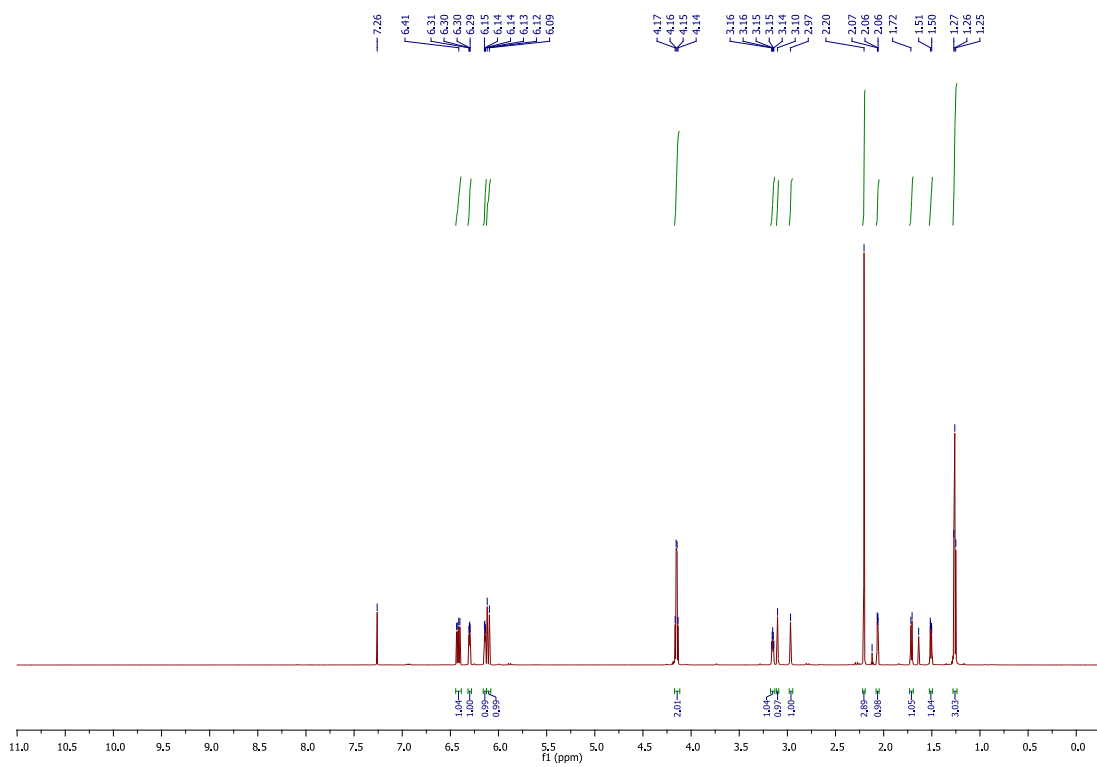

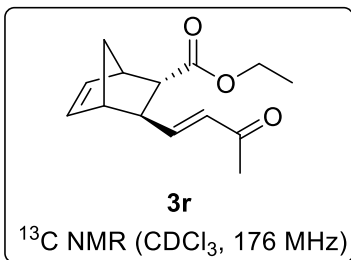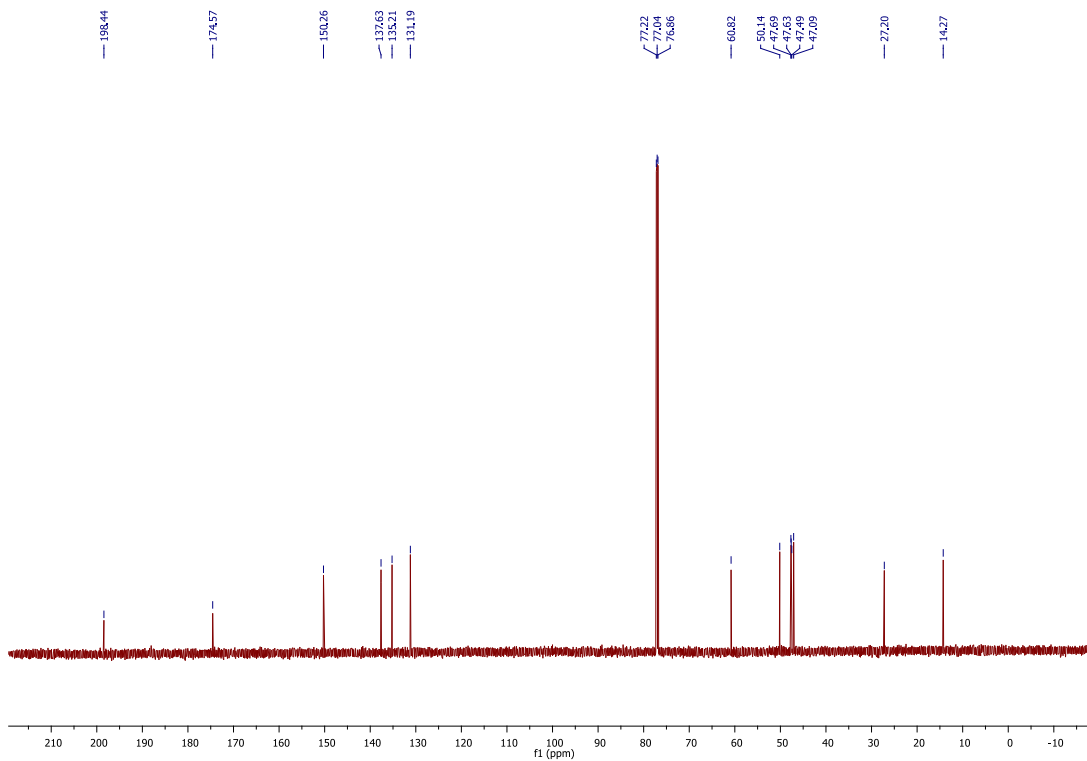

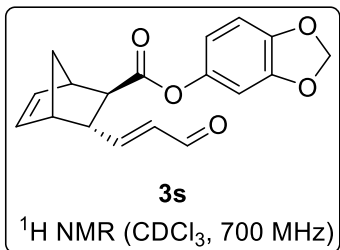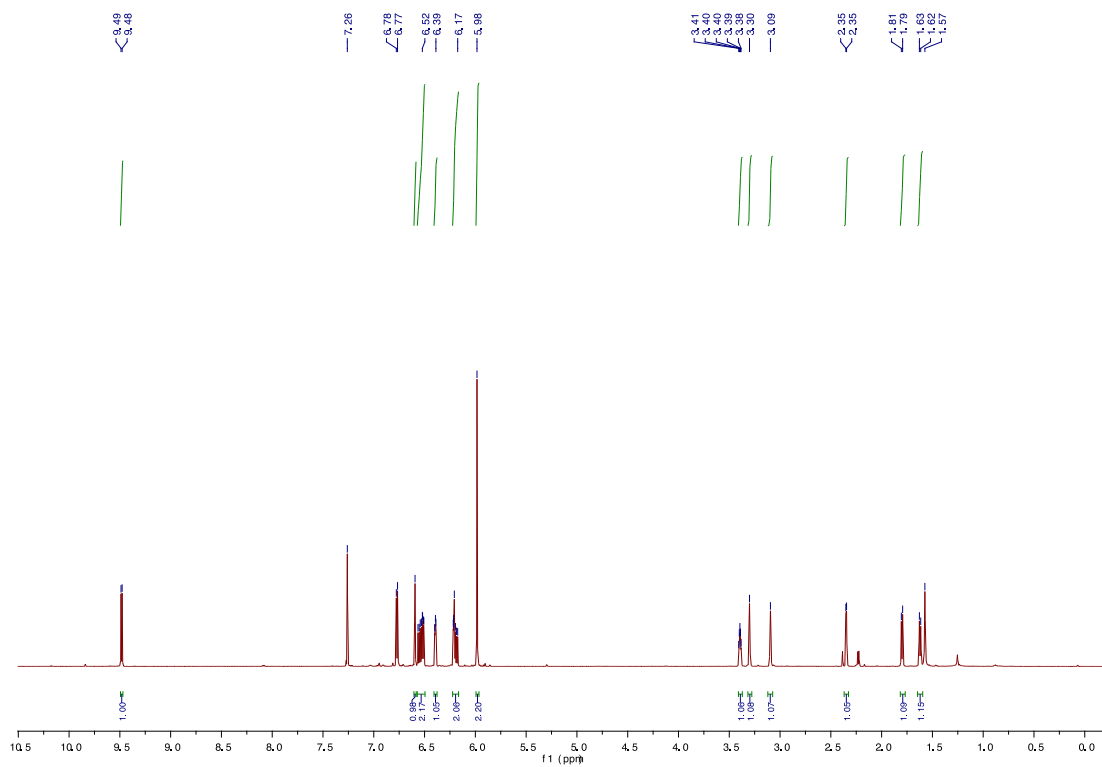

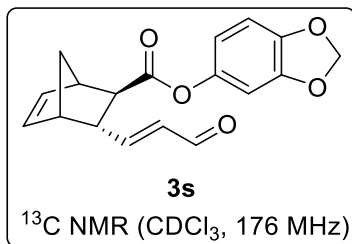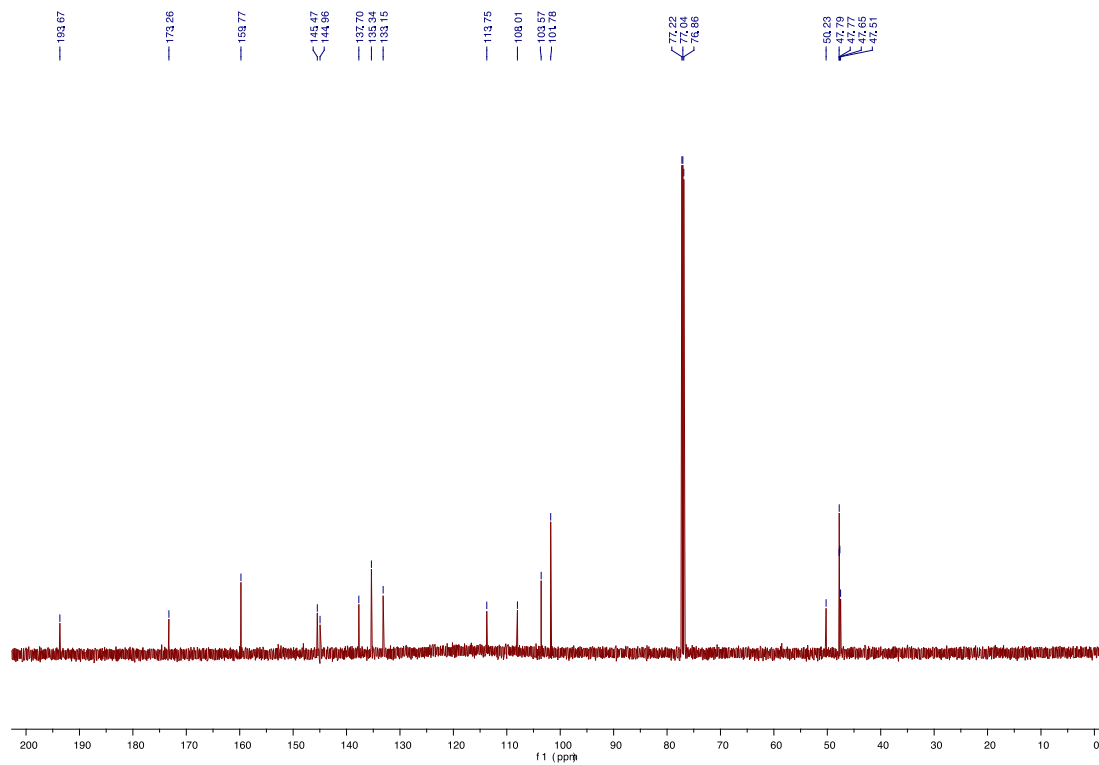



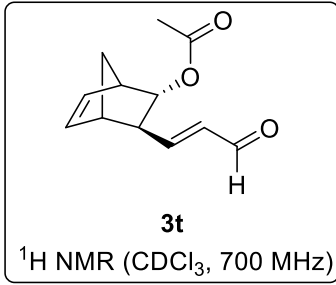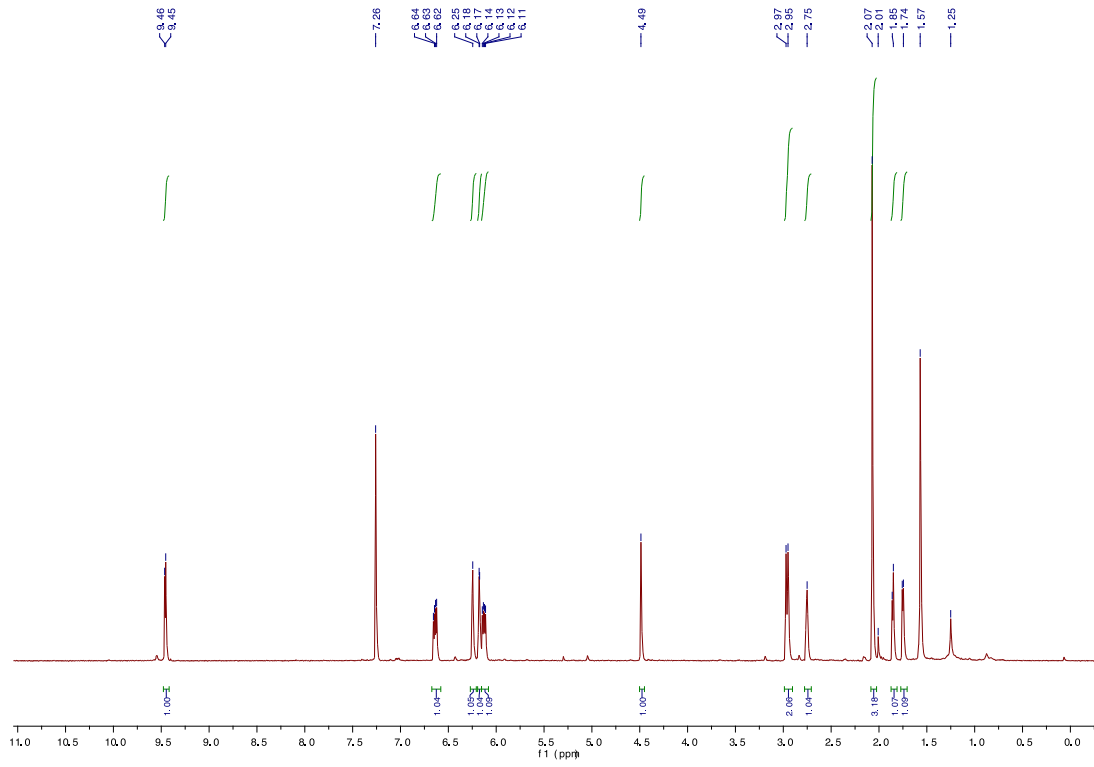

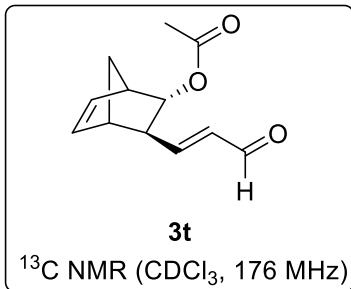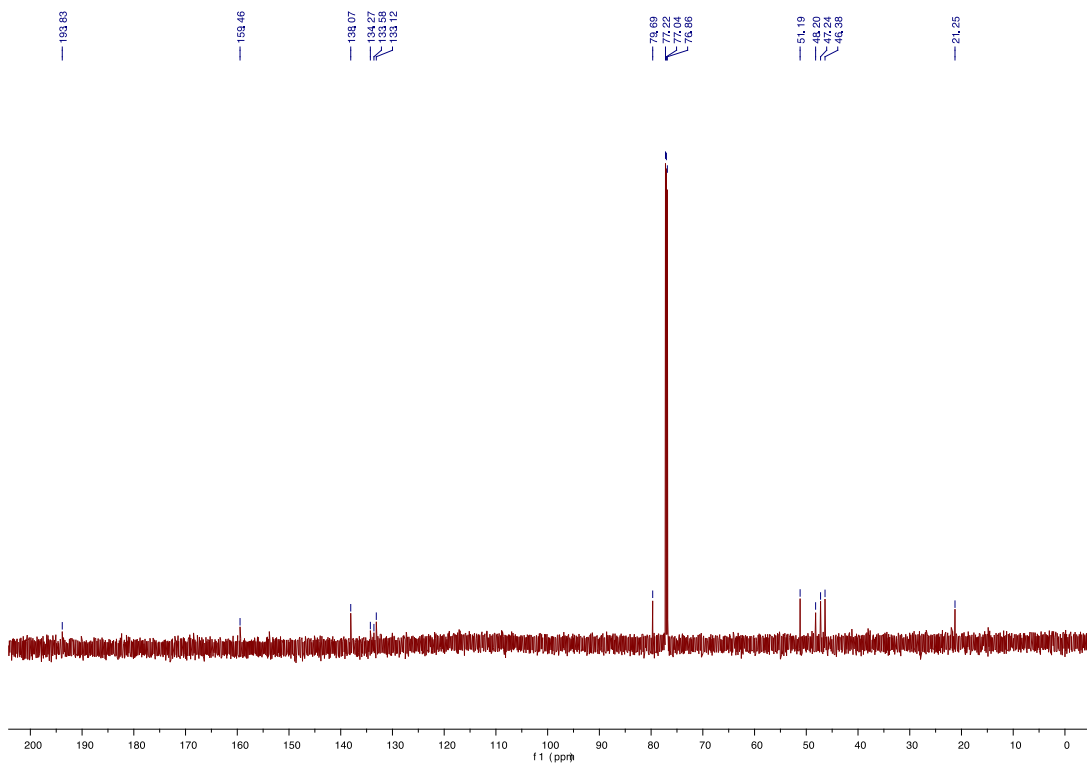

---

## 11. Crystal data and structure refinement for 4z-NTf<sub>2</sub>.

|                                 |                                                                                                 |
|---------------------------------|-------------------------------------------------------------------------------------------------|
| Identification code             | ch_mh_0306                                                                                      |
| Empirical formula               | C <sub>48</sub> H <sub>55</sub> Au F <sub>6</sub> N <sub>4</sub> O <sub>11</sub> S <sub>2</sub> |
| Formula weight                  | 1239.04                                                                                         |
| Temperature                     | 100(2) K                                                                                        |
| Wavelength                      | 0.71073 Å                                                                                       |
| Crystal system                  | orthorhombic                                                                                    |
| Space group                     | P 2 <sub>1</sub> 2 <sub>1</sub> 2 <sub>1</sub>                                                  |
| Unit cell dimensions            | a = 9.1199(2) Å    α = 90°<br>b = 23.4191(6) Å    β = 90°<br>c = 23.6083(7) Å    γ = 90°        |
| Volume                          | 5042.3(2) Å <sup>3</sup>                                                                        |
| Z                               | 4                                                                                               |
| Density                         | 1.632 Mg/m <sup>3</sup>                                                                         |
| Absorption coefficient          | 3.086 mm <sup>-1</sup>                                                                          |
| F(000)                          | 2496                                                                                            |
| Crystal size                    | 0.3 × 0.1 × 0.05 mm <sup>3</sup>                                                                |
| Theta range for data collection | 3.316° to 29.698°                                                                               |
| Index ranges                    | -12 ≤ h ≤ 10, -32 ≤ k ≤ 32, -32 ≤ l ≤ 32                                                        |
| Reflections collected           | 148806                                                                                          |
| Independent reflections         | 13136 [R(int) = 0.1034]                                                                         |
| Completeness to theta = 25.242° | 99.7%                                                                                           |
| Absorption correction           | Semi-empirical from equivalents                                                                 |
| Max. and min. transmission      | n/a                                                                                             |
| Refinement method               | Full-matrix least-squares on F <sup>2</sup>                                                     |
| Data / restraints / parameters  | 13136 / 0 / 669                                                                                 |

---

|                                      |                                  |
|--------------------------------------|----------------------------------|
| Goodness-of-fit on $F^2$             | 1.033                            |
| Final R indices [ $I > 2\sigma(I)$ ] | $R_1 = 0.0309$ , $wR_2 = 0.0512$ |
| R indices (all data)                 | $R_1 = 0.0424$ , $wR_2 = 0.0529$ |
| Absolute structure parameter         | -0.009(3)                        |
| Extinction coefficient               | n/a                              |
| Largest diff. peak and hole          | 0.623 and -0.718 $\text{\AA}^3$  |

## 12. References

- (1) E. Wenkert, M. Guo, R. Lavilla, B. Porter, K. Ramachandran, J.-H. Sheu, *J. Org. Chem.* 1990, **55**, 6203.
- (2) E. J. J. Grabowski, R. L. Autrey, *Tetrahedron* 1969, **25**, 4315.
- (3) C.-Y. Wu, T. Horibe, C. B. Jacobsen, F. D. Toste, *Nature* 2015, **517**, 449.
- (4) (a) P. T. Bohan, F. D. Toste, *J. Am. Chem. Soc.* 2017, **139**, 11016. (b) F. Liu, X. Bugaut, M. Schedler, R. Fröhlich, F. Glorius, *Angew. Chem. Int. Ed.* **2011**, *50*, 12626.
- (5) N. Zhao, L. Qiu, X. Wang, Z. An, X. Wan, *Tetrahedron Lett.* 2014, **55**, 1040.
- (6) M. Diaz, J. Ibarzo, J. M. Jiménez, R. M. Ortuño, *Tetrahedron Asymmetry* 1993, **4**, 669.
- (7) Y. Zhao, D. Truhlar, *Theor. Chem. Acc.* 2008, **120**, 215.
- (8) F. Weigend, R. Ahlrichs, *Phys. Chem. Chem. Phys.* 2005, **7**, 3297.
- (9) M. J. Frisch, G. W. Trucks, H. B. Schlegel, G. E. Scuseria, M. A. Robb, J. R. Cheeseman, G. Scalmani, V. Barone, B. Mennucci, G. A. Petersson, H. Nakatsuji, M. Caricato, X. Li, H. P. Hratchian, A. F. Izmaylov, J. Bloino, G. Zheng, J. L. Sonnenberg, M. Had, and D. J. F. Gaussian Inc.: Wallingford CT 2016.
- (10) E. D. Glendening, J. K. Badenhoop, A. E. Reed, J. E. Carpenter, J. A. Bohmann, C. M. Morales, C. R. Landis, F. Weinhold, Theoretical Chemistry Institute, University of Wisconsin: Madison, WI.

- 
- (11) T. Piou, F. Romanov-Michailidis, M. Romanova-Michaelides, K. E. Jackson, N. Semakul, T. D. Taggart, B. S. Newell, C. D. Rithner, R. S. Paton, T. Rovis, *J. Am. Chem. Soc.* 2017, **139**, 1296.
- (12) The MathWorks, Inc.: Natick, Massachusetts, United States.
- (13) A. D. Becke, *Phys. Rev. A* 1988, **38**, 3098.
- (14) C. Lee, W. Yang, R. G. Parr, *Phys. Rev. B* 1988, **37**, 785.
- (15) R. Krishnan, J. S. Binkley, R. Seeger, J. A. Pople, *J. Chem. Phys.* 1980, **72**, 650.
- (16) P. M. W. Gill, B. G. Johnson, J. A. Pople, M. J. Frisch, *Chem. Phys. Lett.* **1992**, 197, 499.
- (17) P. J. Hay, W. R. Wadt, *J. Chem. Phys.* 1985, **82**, 270.
- (18) P. J. Hay, W. R. Wadt, *J. Chem. Phys.* 1985, **82**, 284.
- (19) J. Tomasi, B. Mennucci, R. Cammi, *Chem. Rev.* 2005, **105**, 2999.
- (20) Schrödinger, LLC: New York, NY 2017.
- (21) G. A. Kaminski, R. A. Friesner, J. Tirado-Rives, W. L. Jorgensen, *J. Phys. Chem. B* 2001, **105**, 6474.
- (22) W. L. Jorgensen, D. S. Maxwell, J. Tirado-Rives, *J. Am. Chem. Soc.* 1996, **118**, 11225.
- (23) W. L. Jorgensen, J. Tirado-Rives, *J. Am. Chem. Soc.* 1988, **110**, 1657.
- (24) A. Verloop, J. Tipker, *Pharmacochem. Libr.* 1977, **10**, 97.
- (25) A. Verloop, J. Tipker, *Pharmacochem. Libr.* 1977, **2**, 63.
- (26) C. B. Santiago, J.-Y. Guo, M. S. Sigman, *Chem. Sci.* 2018, **9**, 2398.
- (27) J.-Y. Guo, Y. Minko, C. B. Santiago, M. S. Sigman, *ACS Catal.* 2017, **7**, 4144.
